# Supplementary material for: A zebrafish screen reveals Renin-angiotensin system inhibitors as neuroprotective via mitochondrial restoration in dopamine neurons
Source: PubMed Central journal article supplement (PMC8457844; doi:10.7554/elife.69795), 2021-09-22

Danio rerio (zebrafish)  
nuclear target - 10.7 kb  
FWD 5' AGAGCGGATTGCTGGATTACAC 3'  
REV 5' GTCCTTGCAGGTTGGCAAATGG 3'

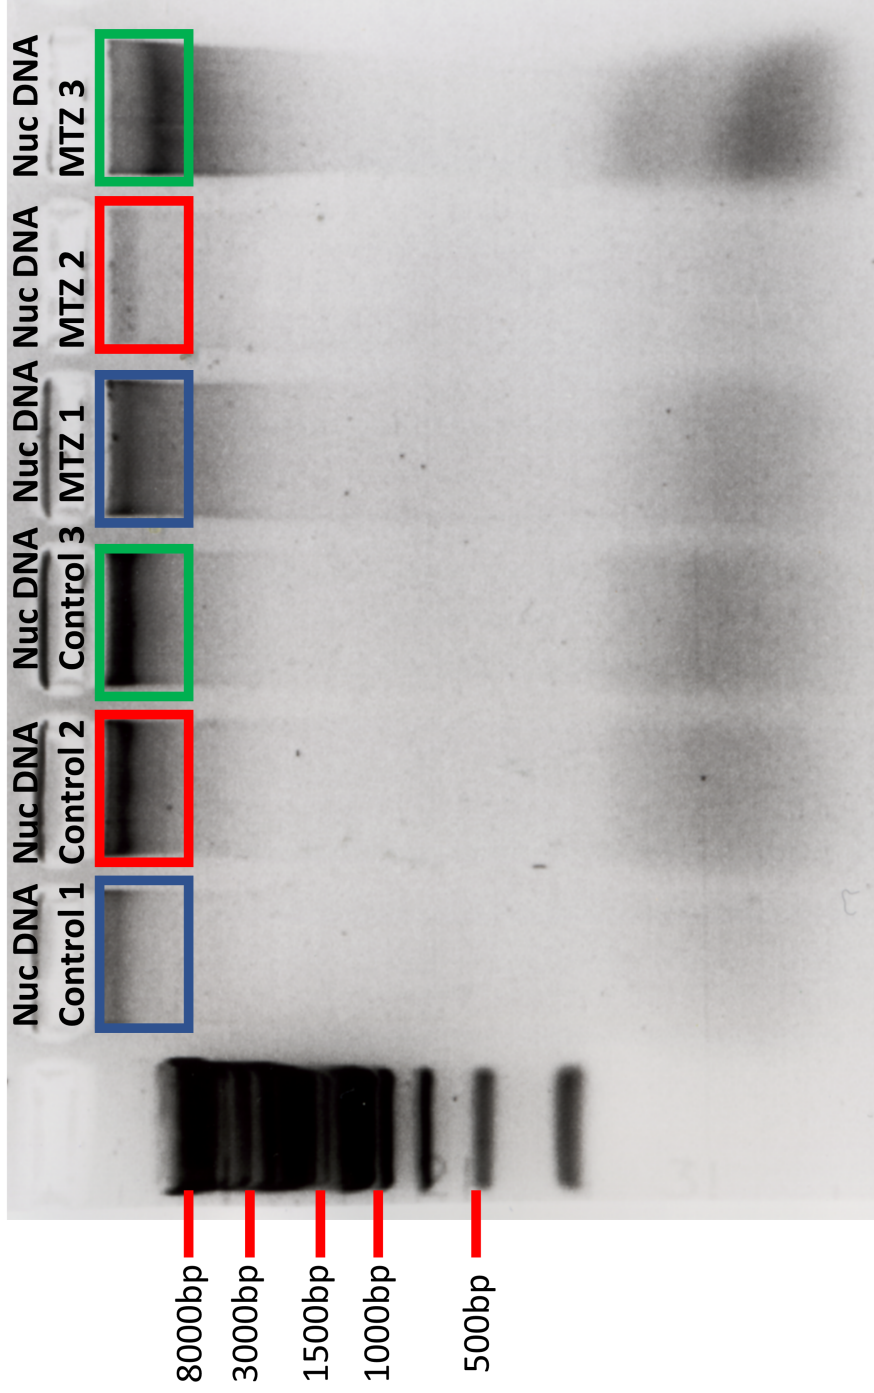

Supplement: elife-69795-fig1-data3.pdf [file elife-69795-fig1-data3.pdf]
