# Supplementary material for: A zebrafish screen reveals Renin-angiotensin system inhibitors as neuroprotective via mitochondrial restoration in dopamine neurons
Source: PubMed Central journal article supplement (PMC8457844; doi:10.7554/elife.69795), 2021-09-22

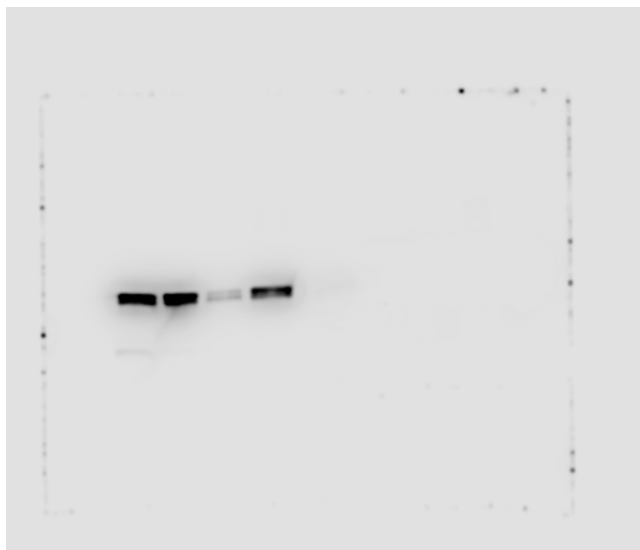

Supplement: elife-69795-fig2-figsupp3-data4.pdf [file elife-69795-fig2-figsupp3-data4.pdf]
