# Supplementary material for: A zebrafish screen reveals Renin-angiotensin system inhibitors as neuroprotective via mitochondrial restoration in dopamine neurons
Source: PubMed Central journal article supplement (PMC8457844; doi:10.7554/elife.69795), 2021-09-22
Supplement: elife-69795-fig3-data2.pdf [file elife-69795-fig3-data2.pdf]

Experiment Information

Name Jeffrey 12/4/2018 2:08:31 PM  
 Date 12/4/2018 2:08:31 PM  
 Model Type LE-SH800SZFCPL  
 Serial Number 1800024  
 Investigator  
 Operator  
 Memo

Sample Group Information

Name Sample Group - 1  
 Species  
 Cell Type  
 Memo

Measurement Settings

## Parameter Settings

| Parameter | Marker | Fluorochrome         | Acquisition Select |        |       |
|-----------|--------|----------------------|--------------------|--------|-------|
|           |        |                      | Area               | Height | Width |
| FSC       | ---    | ---                  | ✓                  | ✓      | ✓     |
| BSC       | ---    | ---                  | ✓                  |        |       |
| FL1       |        | Brilliant Violet 421 |                    |        |       |
| FL2       |        | EGFP                 | ✓                  |        |       |
| FL3       |        | mCherry              | ✓                  |        |       |
| FL4       |        | APC                  |                    |        |       |
| FL5       |        | PerCP-Cy5.5          |                    |        |       |
| FL6       |        | live/dead            | ✓                  |        |       |

Compensation Settings

## Spillover Matrix (%)

| Fluorochrome | Detector |         |           |
|--------------|----------|---------|-----------|
|              | EGFP     | mCherry | live/dead |
| EGFP         | 100.00   | 4.66    | 0.00      |
| mCherry      | 26.06    | 100.00  | 0.00      |
| live/dead    | 0.00     | 0.00    | 100.00    |

## Negative Value

| Parameter | Detector |         |           |
|-----------|----------|---------|-----------|
|           | EGFP     | mCherry | live/dead |
| Area      | 0        | 0       | 0         |
| Height    | 0        | 0       | 0         |

Tube Information

Name DM MTZ\$~\$IsNew  
 Sample ID1  
 Sample ID2  
 Sample ID3  
 Sample ID4

Basic Information

Description  
 Model Type LE-SH800SZFCPL  
 Serial Number 1800024  
 Chip Type Sorting Chip  
 Chip ID 00040347-0000-7027  
 Nozzle Size 100 µm

Sample Stop Condition

None

Recording Setting

Type Gated Event Count  
 Target Gate Singlets  
 Value 30,000

Instrument Setting

| Laser                                                                                       | Threshold   |
|---------------------------------------------------------------------------------------------|-------------|
|  405nm Off | Channel FSC |
|  488nm On  | Value 2.50% |
|  561nm On  |             |
|  638nm On  |             |

## Sensor Gain

|           |           |
|-----------|-----------|
| FSC 16    | BSC 42.5% |
| FL1 40.0% | FL2 40.0% |
| FL3 40.0% | FL4 40.0% |
| FL5 40.0% | FL6 42.0% |

Sample Pressure 8

## AD Advanced Setting

Forward Window Extension 50  
 Back Window Extension

Auto Parameters

|                          |                                     |
|--------------------------|-------------------------------------|
| Droplet Clock            | 23,100 Hz                           |
| Droplet Drive            | 31.09                               |
| Sort Delay               | 20                                  |
| Sort Phase               | 213 deg                             |
| Charge                   | 50.0 %                              |
| Deflection Left          | 1,040                               |
| Deflection Right         | 1,088                               |
| Enabled Control Breakoff | <input checked="" type="checkbox"/> |

Sorting Setting

Sorting Method 2 Way Tubes

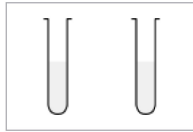

| Collection Tube | Sort Gate | Sort Mode | Cell Size  | Stop Count |
|-----------------|-----------|-----------|------------|------------|
| Left            | H         | Purity    | Large Cell | 0          |
| Right           | G         | Purity    | Large Cell | 0          |

## Worksheet

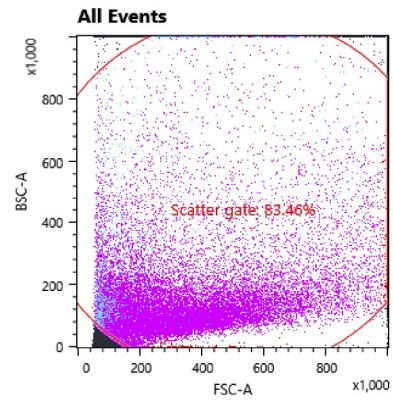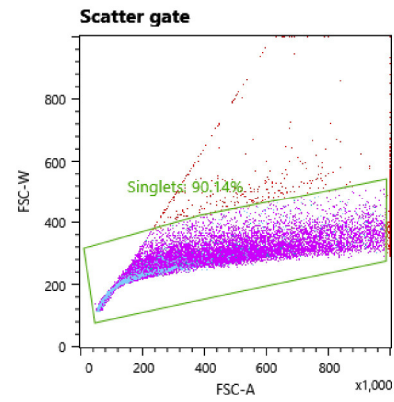

## Gates and Statistics

| Name         | Events | %Parent | %Total  |
|--------------|--------|---------|---------|
| All Events   | 39,877 | 0.00%   | 100.00% |
| Scatter gate | 33,280 | 83.46%  | 83.46%  |
| Singlets     | 30,000 | 90.14%  | 75.23%  |
| F            | 29,975 | 99.92%  | 75.17%  |
| G            | 109    | 0.36%   | 0.27%   |
| H            | 1,361  | 4.54%   | 3.41%   |

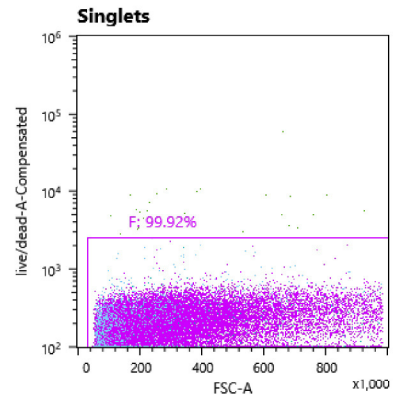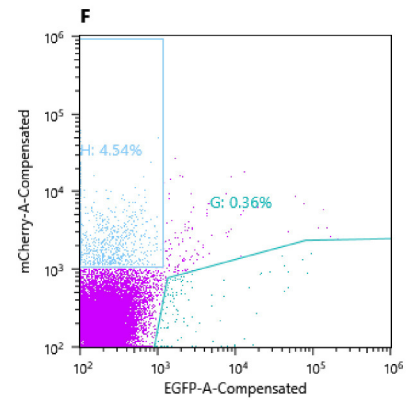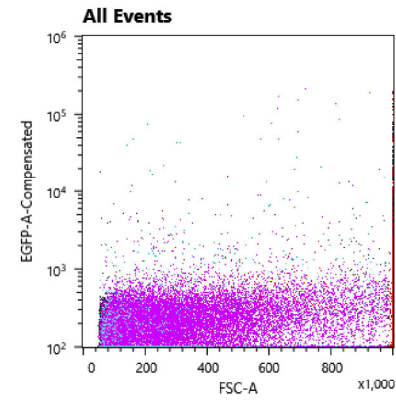

Gates and Statistics

| Name           | Events | %Parent | %Total  |
|----------------|--------|---------|---------|
| ■ All Events   | 39,877 | 0.00%   | 100.00% |
| ■ Scatter gate | 33,280 | 83.46%  | 83.46%  |
| ■ Singlets     | 30,000 | 90.14%  | 75.23%  |
| ■ F            | 29,975 | 99.92%  | 75.17%  |
| ■ G            | 109    | 0.36%   | 0.27%   |
| ■ H            | 1,361  | 4.54%   | 3.41%   |

Recording Result

Total Record Count: 39,877  
Start Time: 12/4/2018 2:26:29 PM  
End Time: 12/4/2018 2:26:47 PM

Sorting Result

Sorting Method

2 Way Tubes

Start Time

12/4/2018 2:25:01 PM

End Time

12/4/2018 2:31:00 PM

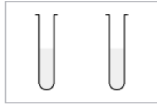

| Collection Tube | Sort Gate | Sort Mode | Elapsed Time | Total Event | Target Ratio | Sorted Count | Sort Rate | Sort Efficiency | Aborted Count | Abort Rate |
|-----------------|-----------|-----------|--------------|-------------|--------------|--------------|-----------|-----------------|---------------|------------|
| Left            | H         | Purity    | 00:05:59     | 811,953     | 3.84%        | 25,709       | 71.52eps  | 82.53%          | 5,442         | 15.14eps   |
| Right           | G         | Purity    | 00:05:59     | 811,953     | 0.24%        | 1,631        | 4.54eps   | 82.63%          | 338           | 0.94eps    |

Experiment Information

Name Jeffrey 12/4/2018 2:08:31 PM  
 Date 12/4/2018 2:08:31 PM  
 Model Type LE-SH800SZFCPL  
 Serial Number 1800024  
 Investigator  
 Operator  
 Memo

Sample Group Information

Name Sample Group - 1  
 Species  
 Cell Type  
 Memo

Measurement Settings

Parameter Settings

| Parameter | Marker | Fluorochrome         | Acquisition Select |        |       |
|-----------|--------|----------------------|--------------------|--------|-------|
|           |        |                      | Area               | Height | Width |
| FSC       | ---    | ---                  | ✓                  | ✓      | ✓     |
| BSC       | ---    | ---                  | ✓                  |        |       |
| FL1       |        | Brilliant Violet 421 |                    |        |       |
| FL2       |        | EGFP                 | ✓                  |        |       |
| FL3       |        | mCherry              | ✓                  |        |       |
| FL4       |        | APC                  |                    |        |       |
| FL5       |        | PerCP-Cy5.5          |                    |        |       |
| FL6       |        | live/dead            | ✓                  |        |       |

Compensation Settings

Spillover Matrix (%)

| Fluorochrome | Detector |         |           |
|--------------|----------|---------|-----------|
|              | EGFP     | mCherry | live/dead |
| EGFP         | 100.00   | 4.66    | 0.00      |
| mCherry      | 26.06    | 100.00  | 0.00      |
| live/dead    | 0.00     | 0.00    | 100.00    |

Negative Value

| Parameter | Detector |         |           |
|-----------|----------|---------|-----------|
|           | EGFP     | mCherry | live/dead |
| Area      | 0        | 0       | 0         |
| Height    | 0        | 0       | 0         |

Tube Information

Name DM  
 Sample ID1  
 Sample ID2  
 Sample ID3  
 Sample ID4

Basic Information

Description  
 Model Type LE-SH800SZFCPL  
 Serial Number 1800024  
 Chip Type Sorting Chip  
 Chip ID 00040347-0000-7027  
 Nozzle Size 100 µm

Sample Stop Condition

None

Recording Setting

Type Gated Event Count  
 Target Gate Singlets  
 Value 10,000

Instrument Setting

| Laser                                                                                       | Threshold   |
|---------------------------------------------------------------------------------------------|-------------|
|  405nm Off | Channel FSC |
|  488nm On  | Value 4.00% |
|  561nm On  |             |
|  638nm On  |             |

## Sensor Gain

|           |           |
|-----------|-----------|
| FSC 16    | BSC 42.5% |
| FL1 40.0% | FL2 40.0% |
| FL3 40.0% | FL4 40.0% |
| FL5 40.0% | FL6 42.0% |

Sample Pressure 8

## AD Advanced Setting

Forward Window Extension 50  
 Back Window Extension

Auto Parameters

|                          |                                     |
|--------------------------|-------------------------------------|
| Droplet Clock            | 23,100 Hz                           |
| Droplet Drive            | 30.90                               |
| Sort Delay               | 20                                  |
| Sort Phase               | 213 deg                             |
| Charge                   | 50.0 %                              |
| Deflection Left          | 1,160                               |
| Deflection Right         | 968                                 |
| Enabled Control Breakoff | <input checked="" type="checkbox"/> |



Sorting Setting

Sorting Method 2 Way Tubes



| Collection Tube | Sort Gate | Sort Mode | Cell Size    | Stop Count |
|-----------------|-----------|-----------|--------------|------------|
| Left            | H         | Purity    | Regular Cell | 0          |
| Right           | G         | Purity    | Regular Cell | 0          |

## Worksheet

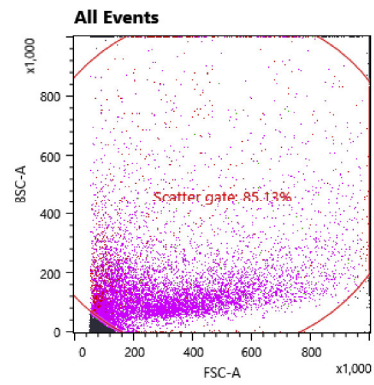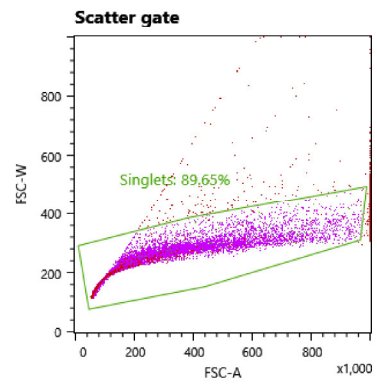

## Gates and Statistics

| Name         | Events | %Parent | %Total  |
|--------------|--------|---------|---------|
| All Events   | 13,103 | 0.00%   | 100.00% |
| Scatter gate | 11,154 | 85.13%  | 85.13%  |
| Singlets     | 10,000 | 89.65%  | 76.32%  |
| F            | 9,987  | 99.87%  | 76.22%  |
| G            | 74     | 0.74%   | 0.56%   |
| H            | 510    | 5.11%   | 3.89%   |

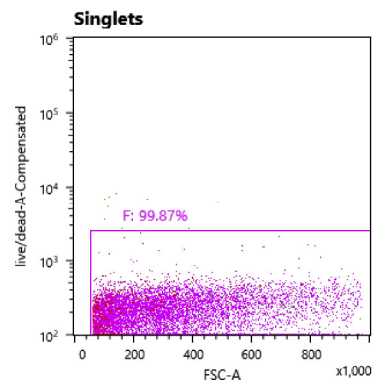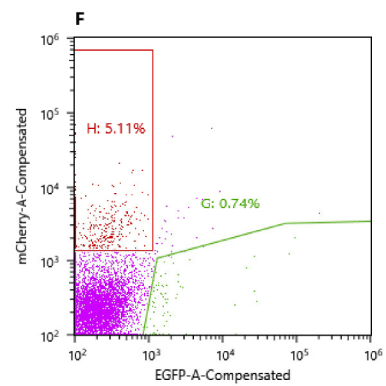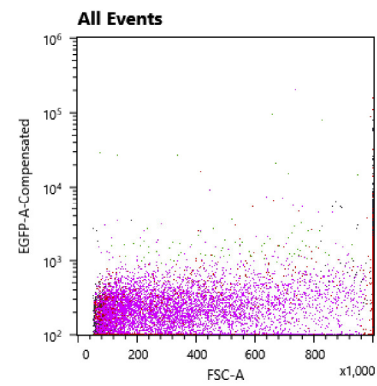

Gates and Statistics

| Name           | Events | %Parent | %Total  |
|----------------|--------|---------|---------|
| ■ All Events   | 13,103 | 0.00%   | 100.00% |
| ■ Scatter gate | 11,154 | 85.13%  | 85.13%  |
| ■ Singlets     | 10,000 | 89.65%  | 76.32%  |
| ■ F            | 9,987  | 99.87%  | 76.22%  |
| ■ G            | 74     | 0.74%   | 0.56%   |
| ■ H            | 510    | 5.11%   | 3.89%   |

Recording Result

Total Record Count: 13,103  
Start Time: 12/4/2018 2:15:46 PM  
End Time: 12/4/2018 2:15:57 PM

Sorting Result

Sorting Method

2 Way Tubes

Start Time

12/4/2018 2:14:53 PM

End Time

12/4/2018 2:21:25 PM



| Collection Tube | Sort Gate | Sort Mode | Elapsed Time | Total Event | Target Ratio | Sorted Count | Sort Rate | Sort Efficiency | Aborted Count | Abort Rate |
|-----------------|-----------|-----------|--------------|-------------|--------------|--------------|-----------|-----------------|---------------|------------|
| Left            | H         | Purity    | 00:06:32     | 805,596     | 3.15%        | 21,074       | 53.75eps  | 83.02%          | 4,309         | 10.99eps   |
| Right           | G         | Purity    | 00:06:32     | 805,596     | 0.48%        | 3,203        | 8.17eps   | 82.66%          | 672           | 1.71eps    |

Experiment Information

Name Jeffrey 12/4/2018 2:08:31 PM  
 Date 12/4/2018 2:08:31 PM  
 Model Type LE-SH800SZFCPL  
 Serial Number 1800024  
 Investigator  
 Operator  
 Memo

Sample Group Information

Name Sample Group - 1  
 Species  
 Cell Type  
 Memo

Measurement Settings

| Parameter Settings |                      |      | Acquisition Select |       |  |
|--------------------|----------------------|------|--------------------|-------|--|
| Marker             | Fluorochrome         | Area | Height             | Width |  |
| FSC                | ---                  | ✓    | ✓                  | ✓     |  |
| BSC                | ---                  | ✓    |                    |       |  |
| FL1                | Brilliant Violet 421 |      |                    |       |  |
| FL2                | EGFP                 | ✓    |                    |       |  |
| FL3                | mCherry              | ✓    |                    |       |  |
| FL4                | APC                  |      |                    |       |  |
| FL5                | PerCP-Cy5.5          |      |                    |       |  |
| FL6                | live/dead            | ✓    |                    |       |  |

Compensation Settings

Spillover Matrix (%)

|              |           | Detector |         |           |
|--------------|-----------|----------|---------|-----------|
|              |           | EGFP     | mCherry | live/dead |
| Fluorochrome | EGFP      | 100.00   | 4.66    | 0.00      |
|              | mCherry   | 26.06    | 100.00  | 0.00      |
|              | live/dead | 0.00     | 0.00    | 100.00    |

Negative Value

|        |   | Detector |         |           |
|--------|---|----------|---------|-----------|
|        |   | EGFP     | mCherry | live/dead |
| Area   | 0 | 0        | 0       |           |
| Height | 0 | 0        | 0       |           |

Tube Information

Name Homo - 1\$~\$IsNew  
 Sample ID1  
 Sample ID2  
 Sample ID3  
 Sample ID4

Basic Information

Description  
 Model Type LE-SH800SZFCPL  
 Serial Number 1800024  
 Chip Type Sorting Chip  
 Chip ID 00040347-0000-7027  
 Nozzle Size 100 µm

Sample Stop Condition

None

Recording Setting

Type Gated Event Count  
 Target Gate Singlets  
 Value 30,000

Instrument Setting

| Laser                                                                                       | Threshold   |
|---------------------------------------------------------------------------------------------|-------------|
|  405nm Off | Channel FSC |
|  488nm On  | Value 2.50% |
|  561nm On  |             |
|  638nm On  |             |

## Sensor Gain

|     |       |     |       |
|-----|-------|-----|-------|
| FSC | 16    | BSC | 42.5% |
| FL1 | 40.0% | FL2 | 40.0% |
| FL3 | 40.0% | FL4 | 40.0% |
| FL5 | 40.0% | FL6 | 42.0% |

Sample Pressure 8

## AD Advanced Setting

Forward Window Extension 50  
 Back Window Extension

Auto Parameters

|                          |                                     |
|--------------------------|-------------------------------------|
| Droplet Clock            | 23,100 Hz                           |
| Droplet Drive            | 31.31                               |
| Sort Delay               | 20                                  |
| Sort Phase               | 213 deg                             |
| Charge                   | 50.0 %                              |
| Deflection Left          | 1,040                               |
| Deflection Right         | 1,088                               |
| Enabled Control Breakoff | <input checked="" type="checkbox"/> |

Sorting Setting

Sorting Method 2 Way Tubes



| Collection Tube | Sort Gate | Sort Mode | Cell Size  | Stop Count |
|-----------------|-----------|-----------|------------|------------|
| Left            | H         | Purity    | Large Cell | 0          |
| Right           | G         | Purity    | Large Cell | 0          |

## Worksheet

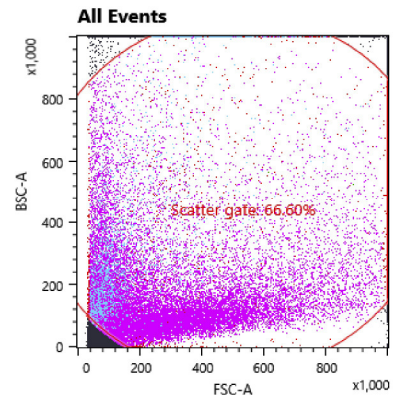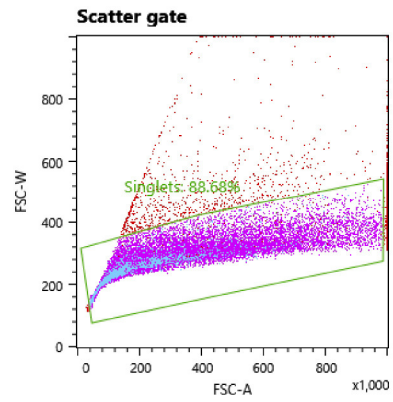

## Gates and Statistics

| Name         | Events | %Parent | %Total  |
|--------------|--------|---------|---------|
| All Events   | 50,792 | 0.00%   | 100.00% |
| Scatter gate | 33,828 | 66.60%  | 66.60%  |
| Singlets     | 30,000 | 88.68%  | 59.06%  |
| F            | 29,994 | 99.98%  | 59.05%  |
| G            | 99     | 0.33%   | 0.19%   |
| H            | 2,057  | 6.86%   | 4.05%   |

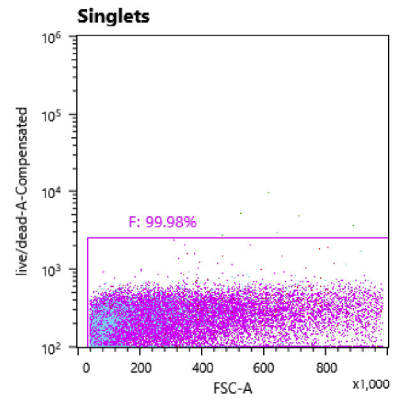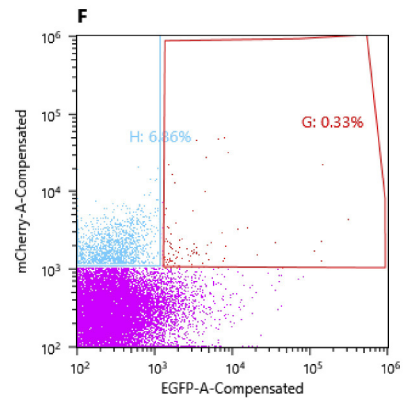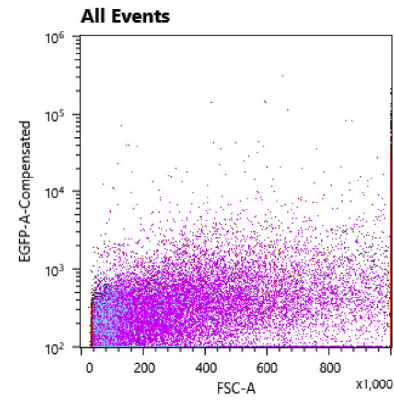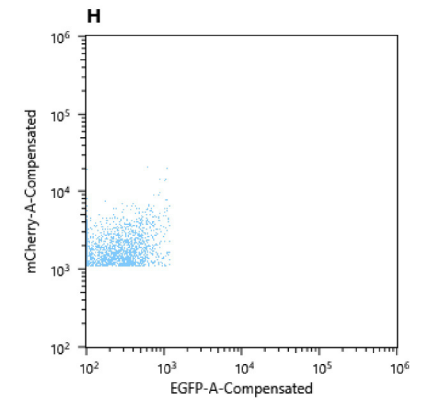



Gates and Statistics

| Name           | Events | %Parent | %Total  |
|----------------|--------|---------|---------|
| ■ All Events   | 50,792 | 0.00%   | 100.00% |
| ■ Scatter gate | 33,828 | 66.60%  | 66.60%  |
| ■ Singlets     | 30,000 | 88.68%  | 59.06%  |
| ■ F            | 29,994 | 99.98%  | 59.05%  |
| ■ G            | 99     | 0.33%   | 0.19%   |
| ■ H            | 2,057  | 6.86%   | 4.05%   |

Recording Result

Total Record Count: 50,792  
Start Time: 12/4/2018 2:41:14 PM  
End Time: 12/4/2018 2:41:23 PM

Sorting Result

Sorting Method

2 Way Tubes

Start Time

12/4/2018 2:38:03 PM

End Time

12/4/2018 2:46:43 PM



| Collection Tube | Sort Gate | Sort Mode | Elapsed Time | Total Event | Target Ratio | Sorted Count | Sort Rate | Sort Efficiency | Aborted Count | Abort Rate |
|-----------------|-----------|-----------|--------------|-------------|--------------|--------------|-----------|-----------------|---------------|------------|
| Left            | H         | Purity    | 00:08:39     | 3,205,799   | 3.85%        | 75,409       | 145.03eps | 61.17%          | 47,877        | 92.08eps   |
| Right           | G         | Purity    | 00:08:39     | 3,205,799   | 0.21%        | 3,964        | 7.62eps   | 58.33%          | 2,832         | 5.45eps    |

Experiment Information

Name Jeffrey 12/4/2018 2:08:31 PM  
 Date 12/4/2018 2:08:31 PM  
 Model Type LE-SH800SZFCPL  
 Serial Number 1800024  
 Investigator  
 Operator  
 Memo

Sample Group Information

Name Sample Group - 1  
 Species  
 Cell Type  
 Memo

Measurement Settings

Parameter Settings

| Parameter | Marker | Fluorochrome         | Acquisition Select |        |       |
|-----------|--------|----------------------|--------------------|--------|-------|
|           |        |                      | Area               | Height | Width |
| FSC       | ---    | ---                  | ✓                  | ✓      | ✓     |
| BSC       | ---    | ---                  | ✓                  |        |       |
| FL1       |        | Brilliant Violet 421 |                    |        |       |
| FL2       |        | EGFP                 | ✓                  |        |       |
| FL3       |        | mCherry              | ✓                  |        |       |
| FL4       |        | APC                  |                    |        |       |
| FL5       |        | PerCP-Cy5.5          |                    |        |       |
| FL6       |        | live/dead            | ✓                  |        |       |

Compensation Settings

Spillover Matrix (%)

| Fluorochrome | Detector |         |           |
|--------------|----------|---------|-----------|
|              | EGFP     | mCherry | live/dead |
| EGFP         | 100.00   | 4.66    | 0.00      |
| mCherry      | 26.06    | 100.00  | 0.00      |
| live/dead    | 0.00     | 0.00    | 100.00    |

Negative Value

| Parameter | Detector |         |           |
|-----------|----------|---------|-----------|
|           | EGFP     | mCherry | live/dead |
| Area      | 0        | 0       | 0         |
| Height    | 0        | 0       | 0         |

Tube Information

Name Homo - MTZ\$~\$IsNew  
 Sample ID1  
 Sample ID2  
 Sample ID3  
 Sample ID4

Basic Information

Description  
 Model Type LE-SH800SZFCPL  
 Serial Number 1800024  
 Chip Type Sorting Chip  
 Chip ID 00040347-0000-7027  
 Nozzle Size 100 µm

Sample Stop Condition

None

Recording Setting

Type Gated Event Count  
 Target Gate Singlets  
 Value 30,000

Instrument Setting

| Laser                                                                                       | Threshold   |
|---------------------------------------------------------------------------------------------|-------------|
|  405nm Off | Channel FSC |
|  488nm On  | Value 2.50% |
|  561nm On  |             |
|  638nm On  |             |

## Sensor Gain

|     |       |     |       |
|-----|-------|-----|-------|
| FSC | 16    | BSC | 39.5% |
| FL1 | 40.0% | FL2 | 40.0% |
| FL3 | 40.0% | FL4 | 40.0% |
| FL5 | 40.0% | FL6 | 42.0% |

Sample Pressure 8

## AD Advanced Setting

Forward Window Extension 50  
 Back Window Extension

Auto Parameters

|                          |                                     |
|--------------------------|-------------------------------------|
| Droplet Clock            | 23,100 Hz                           |
| Droplet Drive            | 31.48                               |
| Sort Delay               | 20                                  |
| Sort Phase               | 213 deg                             |
| Charge                   | 50.0 %                              |
| Deflection Left          | 1,040                               |
| Deflection Right         | 1,088                               |
| Enabled Control Breakoff | <input checked="" type="checkbox"/> |

Sorting Setting

Sorting Method 2 Way Tubes



| Collection Tube | Sort Gate | Sort Mode | Cell Size  | Stop Count |
|-----------------|-----------|-----------|------------|------------|
| Left            | H         | Purity    | Large Cell | 0          |
| Right           | G         | Purity    | Large Cell | 0          |

## Worksheet

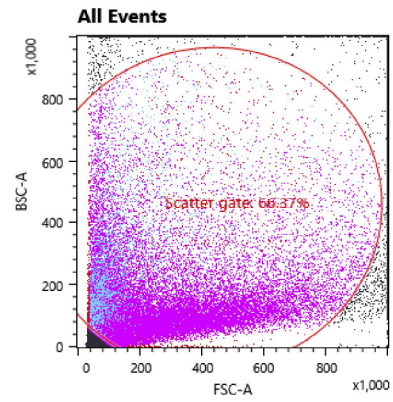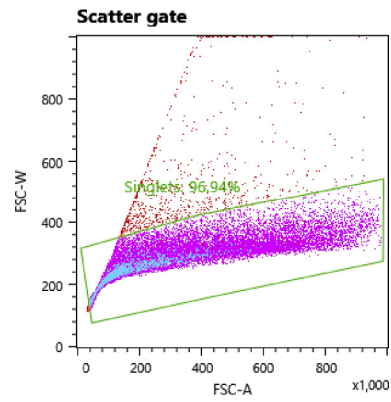

## Gates and Statistics

| Name         | Events | %Parent | %Total  |
|--------------|--------|---------|---------|
| All Events   | 58,660 | 0.00%   | 100.00% |
| Scatter gate | 38,935 | 66.37%  | 66.37%  |
| Singlets     | 37,744 | 96.94%  | 64.34%  |
| F            | 37,742 | 99.99%  | 64.34%  |
| G            | 97     | 0.26%   | 0.17%   |
| H            | 2,405  | 6.37%   | 4.10%   |

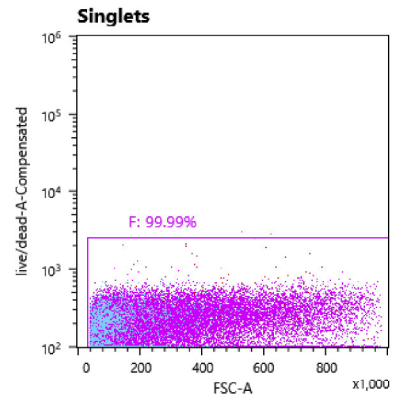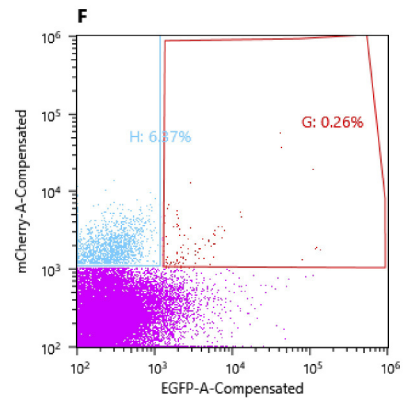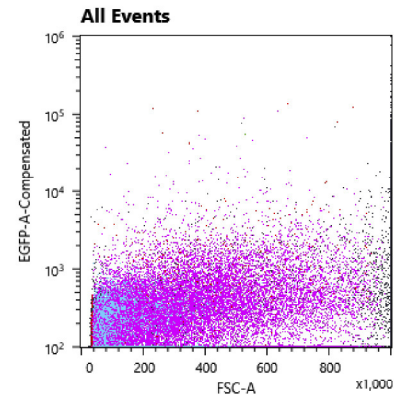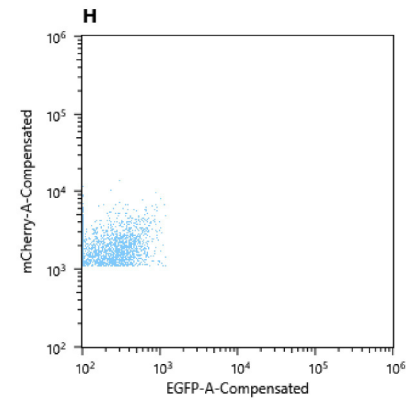

Gates and Statistics

| Name           | Events | %Parent | %Total  |
|----------------|--------|---------|---------|
| ■ All Events   | 58,660 | 0.00%   | 100.00% |
| ■ Scatter gate | 38,935 | 66.37%  | 66.37%  |
| ■ Singlets     | 37,744 | 96.94%  | 64.34%  |
| ■ F            | 37,742 | 99.99%  | 64.34%  |
| ■ G            | 97     | 0.26%   | 0.17%   |
| ■ H            | 2,405  | 6.37%   | 4.10%   |

Recording Result

Total Record Count: 58,660  
Start Time: 12/4/2018 2:50:08 PM  
End Time: 12/4/2018 2:50:19 PM

Sorting Result

Sorting Method

2 Way Tubes

Start Time

12/4/2018 2:49:05 PM

End Time

12/4/2018 2:56:31 PM



| Collection Tube | Sort Gate | Sort Mode | Elapsed Time | Total Event | Target Ratio | Sorted Count | Sort Rate | Sort Efficiency | Aborted Count | Abort Rate |
|-----------------|-----------|-----------|--------------|-------------|--------------|--------------|-----------|-----------------|---------------|------------|
| Left            | H         | Purity    | 00:07:26     | 2,468,291   | 4.43%        | 72,067       | 161.42eps | 65.91%          | 37,277        | 83.50eps   |
| Right           | G         | Purity    | 00:07:26     | 2,468,291   | 0.24%        | 3,909        | 8.76eps   | 65.15%          | 2,091         | 4.68eps    |



Experiment Information

Name Jeffrey 12/4/2018 2:08:31 PM  
 Date 12/4/2018 2:08:31 PM  
 Model Type LE-SH800SZFCPL  
 Serial Number 1800024  
 Investigator  
 Operator  
 Memo

Sample Group Information

Name Sample Group - 1  
 Species  
 Cell Type  
 Memo

Measurement Settings

Parameter Settings

| Parameter | Marker | Fluorochrome         | Acquisition Select |        |       |
|-----------|--------|----------------------|--------------------|--------|-------|
|           |        |                      | Area               | Height | Width |
| FSC       | ---    | ---                  | ✓                  | ✓      | ✓     |
| BSC       | ---    | ---                  | ✓                  |        |       |
| FL1       |        | Brilliant Violet 421 |                    |        |       |
| FL2       |        | EGFP                 | ✓                  |        |       |
| FL3       |        | mCherry              | ✓                  |        |       |
| FL4       |        | APC                  |                    |        |       |
| FL5       |        | PerCP-Cy5.5          |                    |        |       |
| FL6       |        | live/dead            | ✓                  |        |       |

Compensation Settings

Spillover Matrix (%)

| Fluorochrome | Detector |         |           |
|--------------|----------|---------|-----------|
|              | EGFP     | mCherry | live/dead |
| EGFP         | 100.00   | 4.66    | 0.00      |
| mCherry      | 26.06    | 100.00  | 0.00      |
| live/dead    | 0.00     | 0.00    | 100.00    |

Negative Value

| Parameter | Detector |         |           |
|-----------|----------|---------|-----------|
|           | EGFP     | mCherry | live/dead |
| Area      | 0        | 0       | 0         |
| Height    | 0        | 0       | 0         |

Tube Information

Name Homo\$~\$IsNew  
 Sample ID1  
 Sample ID2  
 Sample ID3  
 Sample ID4

Basic Information

Description  
 Model Type LE-SH800SZFCPL  
 Serial Number 1800024  
 Chip Type Sorting Chip  
 Chip ID 00040347-0000-7027  
 Nozzle Size 100 µm

Sample Stop Condition

None

Recording Setting

Type Gated Event Count  
 Target Gate Singlets  
 Value 30,000

Instrument Setting

| Laser                                                                                       | Threshold   |
|---------------------------------------------------------------------------------------------|-------------|
|  405nm Off | Channel FSC |
|  488nm On  | Value 2.50% |
|  561nm On  |             |
|  638nm On  |             |

## Sensor Gain

|           |           |
|-----------|-----------|
| FSC 16    | BSC 42.5% |
| FL1 40.0% | FL2 40.0% |
| FL3 40.0% | FL4 40.0% |
| FL5 40.0% | FL6 42.0% |

Sample Pressure 8

## AD Advanced Setting

Forward Window Extension 50  
 Back Window Extension

Auto Parameters

|                          |                                     |
|--------------------------|-------------------------------------|
| Droplet Clock            | 23,100 Hz                           |
| Droplet Drive            | 31.28                               |
| Sort Delay               | 20                                  |
| Sort Phase               | 213 deg                             |
| Charge                   | 50.0 %                              |
| Deflection Left          | 1,040                               |
| Deflection Right         | 1,088                               |
| Enabled Control Breakoff | <input checked="" type="checkbox"/> |

Sorting Setting

Sorting Method 2 Way Tubes



| Collection Tube | Sort Gate | Sort Mode | Cell Size  | Stop Count |
|-----------------|-----------|-----------|------------|------------|
| Left            | H         | Purity    | Large Cell | 0          |
| Right           | G         | Purity    | Large Cell | 0          |

## Worksheet

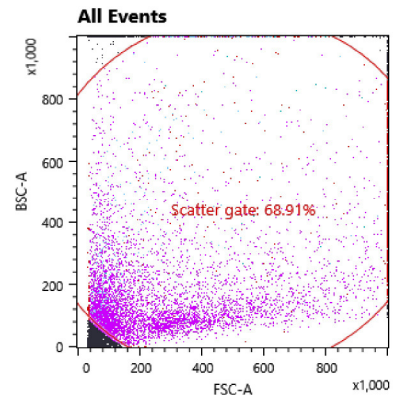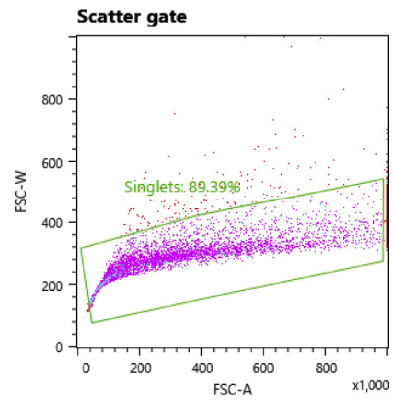

## Gates and Statistics

| Name         | Events | %Parent | %Total  |
|--------------|--------|---------|---------|
| All Events   | 10,000 | 0.00%   | 100.00% |
| Scatter gate | 6,891  | 68.91%  | 68.91%  |
| Singlets     | 6,160  | 89.39%  | 61.60%  |
| F            | 6,160  | 100.00% | 61.60%  |
| G            | 19     | 0.31%   | 0.19%   |
| H            | 285    | 4.63%   | 2.85%   |

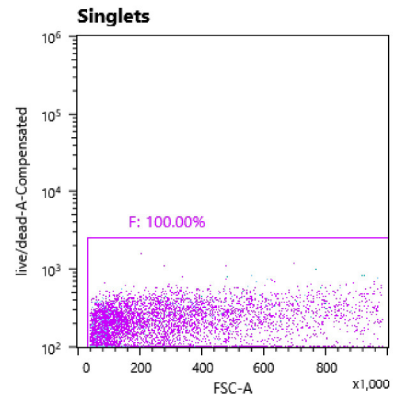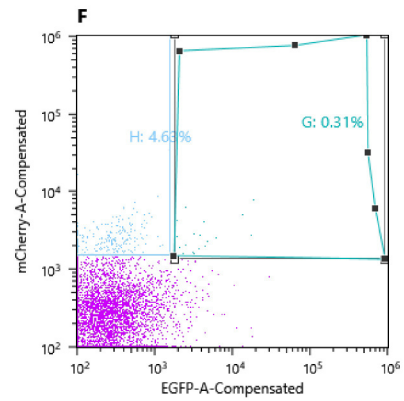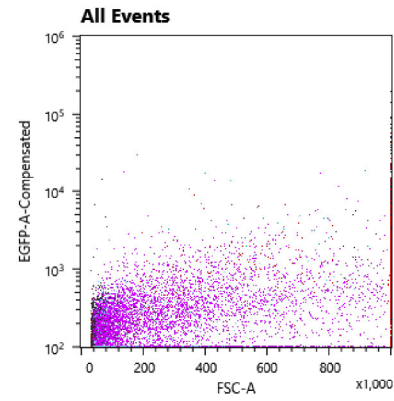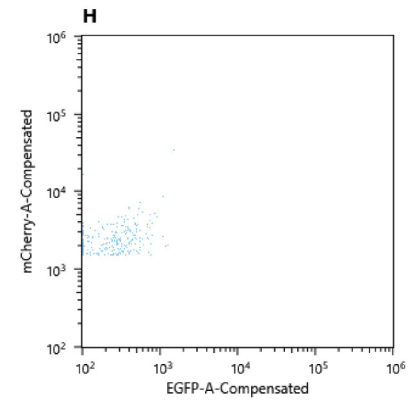

Gates and Statistics

| Name           | Events | %Parent | %Total  |
|----------------|--------|---------|---------|
| ■ All Events   | 10,000 | 0.00%   | 100.00% |
| ■ Scatter gate | 6,891  | 68.91%  | 68.91%  |
| ■ Singlets     | 6,160  | 89.39%  | 61.60%  |
| ■ F            | 6,160  | 100.00% | 61.60%  |
| ■ G            | 19     | 0.31%   | 0.19%   |
| ■ H            | 285    | 4.63%   | 2.85%   |

Sorting Result

Sorting Method

2 Way Tubes

Start Time

12/4/2018 2:35:24 PM

End Time

12/4/2018 2:36:06 PM



| Collection Tube | Sort Gate | Sort Mode | Elapsed Time | Total Event | Target Ratio | Sorted Count | Sort Rate   | Sort Efficiency | Aborted Count | Abort Rate |
|-----------------|-----------|-----------|--------------|-------------|--------------|--------------|-------------|-----------------|---------------|------------|
| Left            | H         | Purity    | 00:00:41     | 138,740     | 6.25%        | 6,454        | 154.96eps   | 74.48%          | 2,211         | 53.09eps   |
| Right           | G         | Purity    | 00:00:41     | 138,740     | 49.99%       | 58,395       | 1,402.07eps | 84.20%          | 10,956        | 263.06eps  |
