# Supplementary material for: A zebrafish screen reveals Renin-angiotensin system inhibitors as neuroprotective via mitochondrial restoration in dopamine neurons
Source: PubMed Central journal article supplement (PMC8457844; doi:10.7554/elife.69795), 2021-09-22
Supplement: elife-69795-fig7-data4.pdf [file elife-69795-fig7-data4.pdf]

## **PPMI Data and Publications Committee (DPC) review approval letter**

**David Bresnahan** <[dbresnahan@michaeljfox.org](mailto:dbresnahan@michaeljfox.org)>

Thank you for submitting your manuscript entitled “A Zebrafish Screen Reveals Renin-Angiotensin System Inhibitors as Neuroprotective via Mitochondrial Restoration in Dopamine Neurons” to the PPMI Data and Publications Committee (DPC) for review. The DPC has reviewed your submission and have the following comments:

- No comments

The DPC did not have any other comments. Please consider this manuscript approved. We wish you luck with the publications process. Please email [ppmi@michaeljfox.org](mailto:ppmi@michaeljfox.org) with subject "Upcoming Publication from PPMI Analysis" when this manuscript has been accepted. Additionally, please send us a link to the article when it is published, as we would like to list it on our PPMI data publications website.

Best,  
David

**David Bresnahan**  
Research Cohorts Officer

**THE MICHAEL J. FOX FOUNDATION FOR PARKINSON'S RESEARCH**  
**Here. Until Parkinson's isn't.**  
Get involved at [MICHAELJFOX.ORG](http://MICHAELJFOX.ORG)
