# Supplementary material for: A zebrafish screen reveals Renin-angiotensin system inhibitors as neuroprotective via mitochondrial restoration in dopamine neurons
Source: eLife journal article supplement (doi:10.7554/elife.69795), 2021-09-22

Danio rerio (zebrafish)  
mitochondrial target - 10.3 kb  
FWD 5' TTAAGCCCCGAATCCAGGTGAGC 3'  
REV 5' GAGATGTTCTCGGGTGTGGGATGG 3'

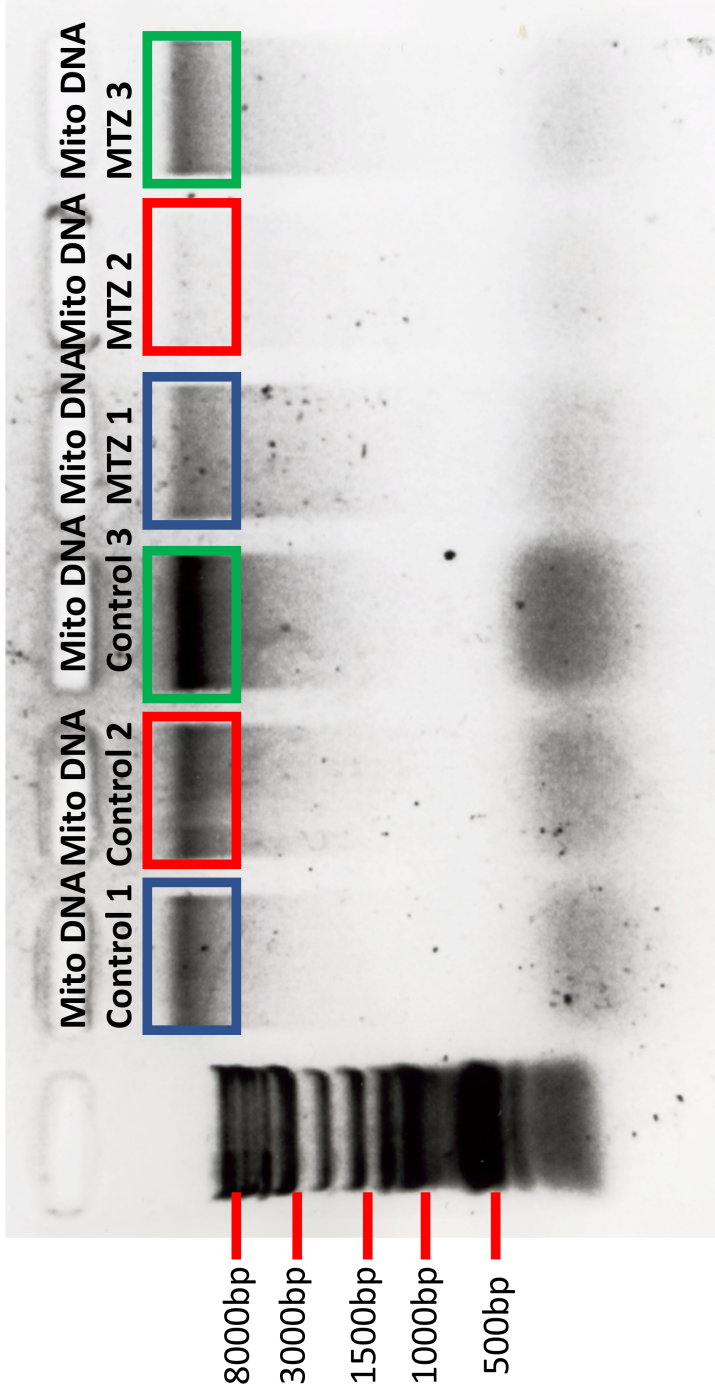

Supplement: fig1-data2 [file elife-69795-fig1-data2-v1.pdf]
