# Supplementary material for: A zebrafish screen reveals Renin-angiotensin system inhibitors as neuroprotective via mitochondrial restoration in dopamine neurons
Source: eLife journal article supplement (doi:10.7554/elife.69795), 2021-09-22

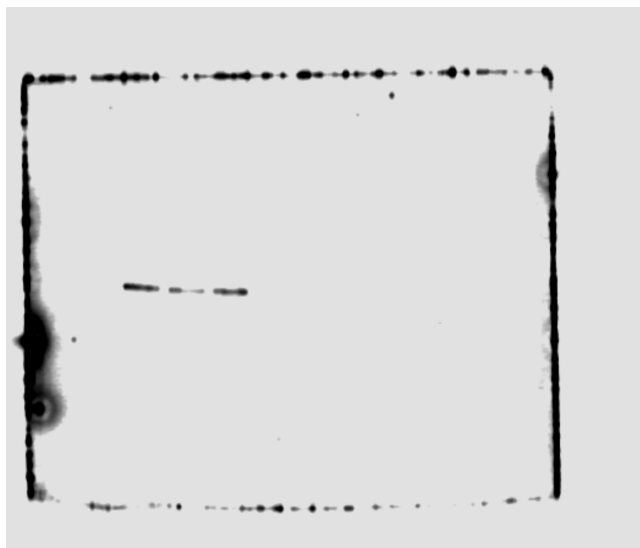

Supplement: fig2-figsupp3-data3 [file elife-69795-fig2-figsupp3-data3-v1.pdf]
