# Supplementary material for: A zebrafish screen reveals Renin-angiotensin system inhibitors as neuroprotective via mitochondrial restoration in dopamine neurons
Source: eLife journal article supplement (doi:10.7554/elife.69795), 2021-09-22
Supplement: fig5-data4 [file elife-69795-fig5-data4-v1.cys]

Archive with 39 entries (39 files):
- CytoscapeSession-2021_03_12-09_32/3.0.0.version
- CytoscapeSession-2021_03_12-09_32/networks/35-From+cyREST.xgmml
- CytoscapeSession-2021_03_12-09_32/views/1162-2294-ColorByPValue.xgmml
- CytoscapeSession-2021_03_12-09_32/views/51-3396-ColorByCluster.xgmml
- CytoscapeSession-2021_03_12-09_32/tables/51-ColorByCluster/LOCAL_ATTRS-org.cytoscape.model.CyNetwork-ColorByCluster+default+network.cytable
- CytoscapeSession-2021_03_12-09_32/tables/51-ColorByCluster/HIDDEN-org.cytoscape.model.CyEdge-51+hidden+edge.cytable
- CytoscapeSession-2021_03_12-09_32/tables/51-ColorByCluster/LOCAL_ATTRS-org.cytoscape.model.CyEdge-ColorByCluster+default+edge.cytable
- CytoscapeSession-2021_03_12-09_32/tables/35-From+cyREST/HIDDEN-org.cytoscape.model.CyNode-35+hidden+node.cytable
- CytoscapeSession-2021_03_12-09_32/tables/51-ColorByCluster/HIDDEN-org.cytoscape.model.CyNetwork-51+hidden+network.cytable
- CytoscapeSession-2021_03_12-09_32/tables/1162-ColorByPValue/HIDDEN-org.cytoscape.model.CyNode-1162+hidden+node.cytable
- CytoscapeSession-2021_03_12-09_32/tables/1162-ColorByPValue/HIDDEN-org.cytoscape.model.CyEdge-1162+hidden+edge.cytable
- CytoscapeSession-2021_03_12-09_32/tables/51-ColorByCluster/LOCAL_ATTRS-org.cytoscape.model.CyNode-ColorByCluster+default+node.cytable
- CytoscapeSession-2021_03_12-09_32/tables/1162-ColorByPValue/LOCAL_ATTRS-org.cytoscape.model.CyNetwork-ColorByPValue+default+network.cytable
- CytoscapeSession-2021_03_12-09_32/tables/35-From+cyREST/SHARED_ATTRS-org.cytoscape.model.CyNetwork-35+shared+network.cytable
- CytoscapeSession-2021_03_12-09_32/tables/1162-ColorByPValue/LOCAL_ATTRS-org.cytoscape.model.CyNode-ColorByPValue+default+node.cytable
- CytoscapeSession-2021_03_12-09_32/tables/35-From+cyREST/LOCAL_ATTRS-org.cytoscape.model.CyEdge-35+default+edge.cytable
- CytoscapeSession-2021_03_12-09_32/tables/51-ColorByCluster/HIDDEN-org.cytoscape.model.CyNode-51+hidden+node.cytable
- CytoscapeSession-2021_03_12-09_32/tables/35-From+cyREST/HIDDEN-org.cytoscape.model.CyNetwork-35+hidden+network.cytable
- CytoscapeSession-2021_03_12-09_32/tables/35-From+cyREST/HIDDEN-org.cytoscape.model.CyEdge-35+hidden+edge.cytable
- CytoscapeSession-2021_03_12-09_32/tables/35-From+cyREST/LOCAL_ATTRS-org.cytoscape.model.CyNode-35+default+node.cytable
- CytoscapeSession-2021_03_12-09_32/tables/35-From+cyREST/SHARED_ATTRS-org.cytoscape.model.CyEdge-35+shared+edge.cytable
- CytoscapeSession-2021_03_12-09_32/tables/35-From+cyREST/SHARED_ATTRS-org.cytoscape.model.CyNode-35+shared+node.cytable
- CytoscapeSession-2021_03_12-09_32/tables/35-From+cyREST/LOCAL_ATTRS-org.cytoscape.model.CyNetwork-35+default+network.cytable
- CytoscapeSession-2021_03_12-09_32/tables/1162-ColorByPValue/HIDDEN-org.cytoscape.model.CyNetwork-1162+hidden+network.cytable
- CytoscapeSession-2021_03_12-09_32/tables/1162-ColorByPValue/LOCAL_ATTRS-org.cytoscape.model.CyEdge-ColorByPValue+default+edge.cytable
- CytoscapeSession-2021_03_12-09_32/tables/cytables.xml
- CytoscapeSession-2021_03_12-09_32/session_vizmap.xml
- CytoscapeSession-2021_03_12-09_32/properties/session_bookmarks.xml
- CytoscapeSession-2021_03_12-09_32/properties/groupSettings.props
- CytoscapeSession-2021_03_12-09_32/session_thumbnail.png
- CytoscapeSession-2021_03_12-09_32/apps/org.cytoscape.ding.customgraphicsmgr/image_metadata.props
- CytoscapeSession-2021_03_12-09_32/apps/org.cytoscape.swing-application/session_state.xml
- CytoscapeSession-2021_03_12-09_32/apps/org.cytoscape.swing-application/network_list.xml
- CytoscapeSession-2021_03_12-09_32/apps/org.cytoscape.filter/filters.json
- CytoscapeSession-2021_03_12-09_32/apps/org.cytoscape.filter/filterChains.json
- CytoscapeSession-2021_03_12-09_32/apps/org.cytoscape.browser/UnassignedTables.props
- CytoscapeSession-2021_03_12-09_32/apps/org.cytoscape.browser/EdgeTable.props
- CytoscapeSession-2021_03_12-09_32/apps/org.cytoscape.browser/NetworkTable.props
- CytoscapeSession-2021_03_12-09_32/apps/org.cytoscape.browser/NodeTable.props
