# Supplementary material for: A zebrafish screen reveals Renin-angiotensin system inhibitors as neuroprotective via mitochondrial restoration in dopamine neurons
Source: eLife journal article supplement (doi:10.7554/elife.69795), 2021-09-22
Supplement: fig5-data4 [file elife-69795-fig5-data4-v1.cys › CytoscapeSession-2021_03_12-09_32/apps/org.cytoscape.browser/EdgeTable.props]

ColorByPValue default edge	0	SUID	false
ColorByPValue default edge	1	selected	false
ColorByPValue default edge	2	shared name	true
ColorByPValue default edge	3	shared interaction	true
ColorByPValue default edge	4	Gene_A	true
ColorByPValue default edge	5	Name_A	true
ColorByPValue default edge	6	Gene_B	true
ColorByPValue default edge	7	Name_B	true
ColorByPValue default edge	8	TYPE	true
ColorByPValue default edge	9	SCORE	true
ColorByPValue default edge	10	source	true
ColorByPValue default edge	11	target	true
ColorByPValue default edge	12	name	true
ColorByPValue default edge	13	interaction	true
ColorByPValue default edge	14	source_original	true
ColorByPValue default edge	15	target_original	true
ColorByPValue default edge	16	BEND_MAP_ID	true
