# Supplementary material for: A zebrafish screen reveals Renin-angiotensin system inhibitors as neuroprotective via mitochondrial restoration in dopamine neurons
Source: eLife journal article supplement (doi:10.7554/elife.69795), 2021-09-22
Supplement: fig5-data4 [file elife-69795-fig5-data4-v1.cys › CytoscapeSession-2021_03_12-09_32/apps/org.cytoscape.browser/NetworkTable.props]

ColorByPValue default network	0	SUID	false
ColorByPValue default network	1	selected	false
ColorByPValue default network	2	shared name	true
ColorByPValue default network	3	name	true
ColorByPValue default network	4	__Annotations	true
