# Supplementary material for: A zebrafish screen reveals Renin-angiotensin system inhibitors as neuroprotective via mitochondrial restoration in dopamine neurons
Source: eLife journal article supplement (doi:10.7554/elife.69795), 2021-09-22
Supplement: fig5-data4 [file elife-69795-fig5-data4-v1.cys › CytoscapeSession-2021_03_12-09_32/apps/org.cytoscape.browser/NodeTable.props]

ColorByPValue default node	0	SUID	false
ColorByPValue default node	1	selected	false
ColorByPValue default node	2	shared name	true
ColorByPValue default node	3	canonicalName	true
ColorByPValue default node	4	Description	true
ColorByPValue default node	5	Category	true
ColorByPValue default node	6	LogP	true
ColorByPValue default node	7	Log(q-value)	true
ColorByPValue default node	8	GROUP_ID	true
ColorByPValue default node	9	Hits	true
ColorByPValue default node	10	Enrichment	true
ColorByPValue default node	11	Z-score	true
ColorByPValue default node	12	#GeneInGOAndHitList	true
ColorByPValue default node	13	#GeneInGO	true
ColorByPValue default node	14	#GeneInHitList	true
ColorByPValue default node	15	#TotalGeneInLibrary	true
ColorByPValue default node	16	%InGO	true
ColorByPValue default node	17	STDV %InGO	true
ColorByPValue default node	18	BestLogPInGroup	true
ColorByPValue default node	19	BestEnrichmentInGroup	true
ColorByPValue default node	20	FirstInGroupByEnrichment	true
ColorByPValue default node	21	FirstInGroupByLogP	true
ColorByPValue default node	22	GeneID	true
ColorByPValue default node	23	_RANK_	true
ColorByPValue default node	24	_PATTERN_	true
ColorByPValue default node	25	CLUSTER_LABEL	true
ColorByPValue default node	26	#COUNT_001	true
ColorByPValue default node	27	_MEMBER_MyList	true
ColorByPValue default node	28	_LogP_MyList	true
ColorByPValue default node	29	Gene	true
ColorByPValue default node	30	GiniIndex	true
ColorByPValue default node	31	CategoryID	true
ColorByPValue default node	32	PARENT_GO	true
ColorByPValue default node	33	EvidenceCutoff	true
ColorByPValue default node	34	id	true
ColorByPValue default node	35	name	true
ColorByPValue default node	36	STDV_InGO	true
ColorByPValue default node	37	Log_q_value_	true
ColorByPValue default node	38	Symbol	true
ColorByPValue default node	39	Z_score	true
ColorByPValue default node	40	_InGO	true
