# Supplementary material for: A zebrafish screen reveals Renin-angiotensin system inhibitors as neuroprotective via mitochondrial restoration in dopamine neurons
Source: eLife journal article supplement (doi:10.7554/elife.69795), 2021-09-22
Supplement: fig5-data4 [file elife-69795-fig5-data4-v1.cys › CytoscapeSession-2021_03_12-09_32/networks/35-From+cyREST.xgmml]

<?xml version="1.0" encoding="UTF-8" standalone="yes"?>
<graph id="35" label="From cyREST" cy:view="0" cy:registered="0" cy:documentVersion="3.0" xmlns:dc="http://purl.org/dc/elements/1.1/" xmlns:xlink="http://www.w3.org/1999/xlink" xmlns:rdf="http://www.w3.org/1999/02/22-rdf-syntax-ns#" xmlns:cy="http://www.cytoscape.org" xmlns="http://www.cs.rpi.edu/XGMML">
  <att>
    <graph id="51" label="ColorByCluster" cy:registered="1">
      <node id="229" label="169"/>
      <node id="228" label="168"/>
      <node id="227" label="167"/>
      <node id="226" label="166"/>
      <node id="225" label="165"/>
      <node id="224" label="164"/>
      <node id="223" label="163"/>
      <node id="222" label="162"/>
      <node id="221" label="161"/>
      <node id="220" label="160"/>
      <node id="219" label="159"/>
      <node id="218" label="158"/>
      <node id="217" label="157"/>
      <node id="216" label="156"/>
      <node id="215" label="155"/>
      <node id="214" label="154"/>
      <node id="213" label="153"/>
      <node id="212" label="152"/>
      <node id="211" label="151"/>
      <node id="210" label="150"/>
      <node id="209" label="149"/>
      <node id="208" label="148"/>
      <node id="207" label="147"/>
      <node id="206" label="146"/>
      <node id="205" label="145"/>
      <node id="204" label="144"/>
      <node id="203" label="143"/>
      <node id="202" label="142"/>
      <node id="201" label="141"/>
      <node id="200" label="140"/>
      <node id="199" label="139"/>
      <node id="198" label="138"/>
      <node id="197" label="137"/>
      <node id="196" label="136"/>
      <node id="195" label="135"/>
      <node id="194" label="134"/>
      <node id="193" label="133"/>
      <node id="192" label="132"/>
      <node id="191" label="131"/>
      <node id="190" label="130"/>
      <node id="189" label="129"/>
      <node id="188" label="128"/>
      <node id="187" label="127"/>
      <node id="186" label="126"/>
      <node id="185" label="125"/>
      <node id="184" label="124"/>
      <node id="183" label="123"/>
      <node id="182" label="122"/>
      <node id="181" label="121"/>
      <node id="180" label="120"/>
      <node id="179" label="119"/>
      <node id="178" label="118"/>
      <node id="177" label="117"/>
      <node id="176" label="116"/>
      <node id="175" label="115"/>
      <node id="174" label="114"/>
      <node id="173" label="113"/>
      <node id="172" label="112"/>
      <node id="171" label="111"/>
      <node id="170" label="110"/>
      <node id="169" label="109"/>
      <node id="168" label="108"/>
      <node id="167" label="107"/>
      <node id="166" label="106"/>
      <node id="165" label="105"/>
      <node id="164" label="104"/>
      <node id="163" label="103"/>
      <node id="162" label="102"/>
      <node id="161" label="101"/>
      <node id="160" label="100"/>
      <node id="159" label="99"/>
      <node id="158" label="98"/>
      <node id="157" label="97"/>
      <node id="156" label="96"/>
      <node id="155" label="95"/>
      <node id="154" label="94"/>
      <node id="153" label="93"/>
      <node id="152" label="92"/>
      <node id="151" label="91"/>
      <node id="150" label="90"/>
      <node id="149" label="89"/>
      <node id="148" label="88"/>
      <node id="147" label="87"/>
      <node id="146" label="86"/>
      <node id="145" label="85"/>
      <node id="144" label="84"/>
      <node id="143" label="83"/>
      <node id="142" label="82"/>
      <node id="141" label="81"/>
      <node id="140" label="80"/>
      <node id="139" label="79"/>
      <node id="138" label="78"/>
      <node id="137" label="77"/>
      <node id="136" label="76"/>
      <node id="135" label="75"/>
      <node id="134" label="74"/>
      <node id="133" label="73"/>
      <node id="132" label="72"/>
      <node id="131" label="71"/>
      <node id="130" label="70"/>
      <node id="129" label="69"/>
      <node id="128" label="68"/>
      <node id="127" label="67"/>
      <node id="126" label="66"/>
      <node id="125" label="65"/>
      <node id="124" label="64"/>
      <node id="123" label="63"/>
      <node id="122" label="62"/>
      <node id="121" label="61"/>
      <node id="120" label="60"/>
      <node id="119" label="59"/>
      <node id="118" label="58"/>
      <node id="117" label="57"/>
      <node id="116" label="56"/>
      <node id="115" label="55"/>
      <node id="114" label="54"/>
      <node id="113" label="53"/>
      <node id="112" label="52"/>
      <node id="111" label="51"/>
      <node id="110" label="50"/>
      <node id="109" label="49"/>
      <node id="108" label="48"/>
      <node id="107" label="47"/>
      <node id="106" label="46"/>
      <node id="105" label="45"/>
      <node id="104" label="44"/>
      <node id="103" label="43"/>
      <node id="102" label="42"/>
      <node id="101" label="41"/>
      <node id="100" label="40"/>
      <node id="99" label="39"/>
      <node id="98" label="38"/>
      <node id="97" label="37"/>
      <node id="96" label="36"/>
      <node id="95" label="35"/>
      <node id="94" label="34"/>
      <node id="93" label="33"/>
      <node id="92" label="32"/>
      <node id="91" label="31"/>
      <node id="90" label="30"/>
      <node id="89" label="29"/>
      <node id="88" label="28"/>
      <node id="87" label="27"/>
      <node id="86" label="26"/>
      <node id="85" label="25"/>
      <node id="84" label="24"/>
      <node id="83" label="23"/>
      <node id="82" label="22"/>
      <node id="81" label="21"/>
      <node id="80" label="20"/>
      <node id="79" label="19"/>
      <node id="78" label="18"/>
      <node id="77" label="17"/>
      <node id="76" label="16"/>
      <node id="75" label="15"/>
      <node id="74" label="14"/>
      <node id="73" label="13"/>
      <node id="72" label="12"/>
      <node id="71" label="11"/>
      <node id="70" label="10"/>
      <node id="69" label="9"/>
      <node id="68" label="8"/>
      <node id="67" label="7"/>
      <node id="66" label="6"/>
      <node id="65" label="5"/>
      <node id="64" label="4"/>
      <node id="63" label="3"/>
      <node id="62" label="2"/>
      <node id="61" label="1"/>
      <edge id="1161" label="1161" source="229" target="163" cy:directed="1"/>
      <edge id="1160" label="1160" source="229" target="162" cy:directed="1"/>
      <edge id="1159" label="1159" source="229" target="161" cy:directed="1"/>
      <edge id="1158" label="1158" source="229" target="160" cy:directed="1"/>
      <edge id="1157" label="1157" source="229" target="159" cy:directed="1"/>
      <edge id="1156" label="1156" source="228" target="150" cy:directed="1"/>
      <edge id="1155" label="1155" source="228" target="76" cy:directed="1"/>
      <edge id="1154" label="1154" source="228" target="73" cy:directed="1"/>
      <edge id="1153" label="1153" source="228" target="71" cy:directed="1"/>
      <edge id="1152" label="1152" source="228" target="70" cy:directed="1"/>
      <edge id="1151" label="1151" source="228" target="215" cy:directed="1"/>
      <edge id="1150" label="1150" source="227" target="172" cy:directed="1"/>
      <edge id="1149" label="1149" source="227" target="164" cy:directed="1"/>
      <edge id="1148" label="1148" source="227" target="184" cy:directed="1"/>
      <edge id="1147" label="1147" source="227" target="183" cy:directed="1"/>
      <edge id="1146" label="1146" source="227" target="87" cy:directed="1"/>
      <edge id="1145" label="1145" source="227" target="86" cy:directed="1"/>
      <edge id="1144" label="1144" source="227" target="182" cy:directed="1"/>
      <edge id="1143" label="1143" source="227" target="181" cy:directed="1"/>
      <edge id="1142" label="1142" source="227" target="85" cy:directed="1"/>
      <edge id="1141" label="1141" source="227" target="84" cy:directed="1"/>
      <edge id="1140" label="1140" source="227" target="212" cy:directed="1"/>
      <edge id="1139" label="1139" source="227" target="83" cy:directed="1"/>
      <edge id="1138" label="1138" source="227" target="82" cy:directed="1"/>
      <edge id="1137" label="1137" source="227" target="81" cy:directed="1"/>
      <edge id="1136" label="1136" source="227" target="80" cy:directed="1"/>
      <edge id="1135" label="1135" source="226" target="138" cy:directed="1"/>
      <edge id="1134" label="1134" source="225" target="124" cy:directed="1"/>
      <edge id="1133" label="1133" source="225" target="123" cy:directed="1"/>
      <edge id="1132" label="1132" source="225" target="122" cy:directed="1"/>
      <edge id="1131" label="1131" source="225" target="121" cy:directed="1"/>
      <edge id="1130" label="1130" source="225" target="96" cy:directed="1"/>
      <edge id="1129" label="1129" source="225" target="93" cy:directed="1"/>
      <edge id="1128" label="1128" source="225" target="92" cy:directed="1"/>
      <edge id="1127" label="1127" source="225" target="91" cy:directed="1"/>
      <edge id="1126" label="1126" source="225" target="89" cy:directed="1"/>
      <edge id="1125" label="1125" source="225" target="222" cy:directed="1"/>
      <edge id="1124" label="1124" source="224" target="188" cy:directed="1"/>
      <edge id="1123" label="1123" source="223" target="200" cy:directed="1"/>
      <edge id="1122" label="1122" source="223" target="199" cy:directed="1"/>
      <edge id="1121" label="1121" source="223" target="198" cy:directed="1"/>
      <edge id="1120" label="1120" source="223" target="197" cy:directed="1"/>
      <edge id="1119" label="1119" source="223" target="196" cy:directed="1"/>
      <edge id="1118" label="1118" source="223" target="194" cy:directed="1"/>
      <edge id="1117" label="1117" source="223" target="193" cy:directed="1"/>
      <edge id="1116" label="1116" source="223" target="192" cy:directed="1"/>
      <edge id="1115" label="1115" source="222" target="122" cy:directed="1"/>
      <edge id="1114" label="1114" source="222" target="121" cy:directed="1"/>
      <edge id="1113" label="1113" source="222" target="93" cy:directed="1"/>
      <edge id="1112" label="1112" source="221" target="209" cy:directed="1"/>
      <edge id="1111" label="1111" source="221" target="208" cy:directed="1"/>
      <edge id="1110" label="1110" source="221" target="207" cy:directed="1"/>
      <edge id="1109" label="1109" source="221" target="206" cy:directed="1"/>
      <edge id="1108" label="1108" source="221" target="205" cy:directed="1"/>
      <edge id="1107" label="1107" source="221" target="204" cy:directed="1"/>
      <edge id="1106" label="1106" source="221" target="202" cy:directed="1"/>
      <edge id="1105" label="1105" source="221" target="201" cy:directed="1"/>
      <edge id="1104" label="1104" source="220" target="131" cy:directed="1"/>
      <edge id="1103" label="1103" source="220" target="130" cy:directed="1"/>
      <edge id="1102" label="1102" source="220" target="97" cy:directed="1"/>
      <edge id="1101" label="1101" source="220" target="67" cy:directed="1"/>
      <edge id="1100" label="1100" source="220" target="63" cy:directed="1"/>
      <edge id="1099" label="1099" source="220" target="62" cy:directed="1"/>
      <edge id="1098" label="1098" source="220" target="210" cy:directed="1"/>
      <edge id="1097" label="1097" source="219" target="145" cy:directed="1"/>
      <edge id="1096" label="1096" source="219" target="141" cy:directed="1"/>
      <edge id="1095" label="1095" source="219" target="140" cy:directed="1"/>
      <edge id="1094" label="1094" source="219" target="96" cy:directed="1"/>
      <edge id="1093" label="1093" source="219" target="139" cy:directed="1"/>
      <edge id="1092" label="1092" source="219" target="95" cy:directed="1"/>
      <edge id="1091" label="1091" source="219" target="92" cy:directed="1"/>
      <edge id="1090" label="1090" source="219" target="91" cy:directed="1"/>
      <edge id="1089" label="1089" source="219" target="90" cy:directed="1"/>
      <edge id="1088" label="1088" source="219" target="89" cy:directed="1"/>
      <edge id="1087" label="1087" source="219" target="225" cy:directed="1"/>
      <edge id="1086" label="1086" source="217" target="120" cy:directed="1"/>
      <edge id="1085" label="1085" source="217" target="119" cy:directed="1"/>
      <edge id="1084" label="1084" source="217" target="118" cy:directed="1"/>
      <edge id="1083" label="1083" source="217" target="117" cy:directed="1"/>
      <edge id="1082" label="1082" source="217" target="116" cy:directed="1"/>
      <edge id="1081" label="1081" source="217" target="95" cy:directed="1"/>
      <edge id="1080" label="1080" source="217" target="94" cy:directed="1"/>
      <edge id="1079" label="1079" source="217" target="93" cy:directed="1"/>
      <edge id="1078" label="1078" source="217" target="92" cy:directed="1"/>
      <edge id="1077" label="1077" source="217" target="91" cy:directed="1"/>
      <edge id="1076" label="1076" source="217" target="90" cy:directed="1"/>
      <edge id="1075" label="1075" source="217" target="89" cy:directed="1"/>
      <edge id="1074" label="1074" source="217" target="225" cy:directed="1"/>
      <edge id="1073" label="1073" source="215" target="75" cy:directed="1"/>
      <edge id="1072" label="1072" source="215" target="73" cy:directed="1"/>
      <edge id="1071" label="1071" source="215" target="70" cy:directed="1"/>
      <edge id="1070" label="1070" source="214" target="133" cy:directed="1"/>
      <edge id="1069" label="1069" source="214" target="131" cy:directed="1"/>
      <edge id="1068" label="1068" source="214" target="130" cy:directed="1"/>
      <edge id="1067" label="1067" source="213" target="156" cy:directed="1"/>
      <edge id="1066" label="1066" source="213" target="68" cy:directed="1"/>
      <edge id="1065" label="1065" source="213" target="67" cy:directed="1"/>
      <edge id="1064" label="1064" source="213" target="62" cy:directed="1"/>
      <edge id="1063" label="1063" source="213" target="61" cy:directed="1"/>
      <edge id="1062" label="1062" source="212" target="186" cy:directed="1"/>
      <edge id="1061" label="1061" source="211" target="114" cy:directed="1"/>
      <edge id="1060" label="1060" source="211" target="109" cy:directed="1"/>
      <edge id="1059" label="1059" source="211" target="108" cy:directed="1"/>
      <edge id="1058" label="1058" source="211" target="107" cy:directed="1"/>
      <edge id="1057" label="1057" source="211" target="106" cy:directed="1"/>
      <edge id="1056" label="1056" source="209" target="208" cy:directed="1"/>
      <edge id="1055" label="1055" source="209" target="201" cy:directed="1"/>
      <edge id="1054" label="1054" source="207" target="209" cy:directed="1"/>
      <edge id="1053" label="1053" source="207" target="208" cy:directed="1"/>
      <edge id="1052" label="1052" source="207" target="206" cy:directed="1"/>
      <edge id="1051" label="1051" source="207" target="205" cy:directed="1"/>
      <edge id="1050" label="1050" source="207" target="204" cy:directed="1"/>
      <edge id="1049" label="1049" source="207" target="201" cy:directed="1"/>
      <edge id="1048" label="1048" source="206" target="209" cy:directed="1"/>
      <edge id="1047" label="1047" source="206" target="208" cy:directed="1"/>
      <edge id="1046" label="1046" source="206" target="205" cy:directed="1"/>
      <edge id="1045" label="1045" source="206" target="201" cy:directed="1"/>
      <edge id="1044" label="1044" source="205" target="209" cy:directed="1"/>
      <edge id="1043" label="1043" source="205" target="208" cy:directed="1"/>
      <edge id="1042" label="1042" source="205" target="201" cy:directed="1"/>
      <edge id="1041" label="1041" source="204" target="209" cy:directed="1"/>
      <edge id="1040" label="1040" source="204" target="208" cy:directed="1"/>
      <edge id="1039" label="1039" source="204" target="206" cy:directed="1"/>
      <edge id="1038" label="1038" source="204" target="205" cy:directed="1"/>
      <edge id="1037" label="1037" source="204" target="201" cy:directed="1"/>
      <edge id="1036" label="1036" source="203" target="209" cy:directed="1"/>
      <edge id="1035" label="1035" source="203" target="208" cy:directed="1"/>
      <edge id="1034" label="1034" source="203" target="207" cy:directed="1"/>
      <edge id="1033" label="1033" source="203" target="206" cy:directed="1"/>
      <edge id="1032" label="1032" source="203" target="205" cy:directed="1"/>
      <edge id="1031" label="1031" source="203" target="204" cy:directed="1"/>
      <edge id="1030" label="1030" source="203" target="202" cy:directed="1"/>
      <edge id="1029" label="1029" source="203" target="201" cy:directed="1"/>
      <edge id="1028" label="1028" source="203" target="221" cy:directed="1"/>
      <edge id="1027" label="1027" source="202" target="209" cy:directed="1"/>
      <edge id="1026" label="1026" source="202" target="208" cy:directed="1"/>
      <edge id="1025" label="1025" source="202" target="207" cy:directed="1"/>
      <edge id="1024" label="1024" source="202" target="206" cy:directed="1"/>
      <edge id="1023" label="1023" source="202" target="205" cy:directed="1"/>
      <edge id="1022" label="1022" source="202" target="204" cy:directed="1"/>
      <edge id="1021" label="1021" source="202" target="201" cy:directed="1"/>
      <edge id="1020" label="1020" source="201" target="208" cy:directed="1"/>
      <edge id="1019" label="1019" source="200" target="199" cy:directed="1"/>
      <edge id="1018" label="1018" source="200" target="198" cy:directed="1"/>
      <edge id="1017" label="1017" source="200" target="197" cy:directed="1"/>
      <edge id="1016" label="1016" source="200" target="196" cy:directed="1"/>
      <edge id="1015" label="1015" source="200" target="194" cy:directed="1"/>
      <edge id="1014" label="1014" source="200" target="193" cy:directed="1"/>
      <edge id="1013" label="1013" source="200" target="192" cy:directed="1"/>
      <edge id="1012" label="1012" source="199" target="197" cy:directed="1"/>
      <edge id="1011" label="1011" source="199" target="194" cy:directed="1"/>
      <edge id="1010" label="1010" source="199" target="193" cy:directed="1"/>
      <edge id="1009" label="1009" source="199" target="192" cy:directed="1"/>
      <edge id="1008" label="1008" source="199" target="93" cy:directed="1"/>
      <edge id="1007" label="1007" source="198" target="199" cy:directed="1"/>
      <edge id="1006" label="1006" source="198" target="197" cy:directed="1"/>
      <edge id="1005" label="1005" source="198" target="196" cy:directed="1"/>
      <edge id="1004" label="1004" source="198" target="194" cy:directed="1"/>
      <edge id="1003" label="1003" source="198" target="193" cy:directed="1"/>
      <edge id="1002" label="1002" source="198" target="192" cy:directed="1"/>
      <edge id="1001" label="1001" source="197" target="194" cy:directed="1"/>
      <edge id="1000" label="1000" source="197" target="192" cy:directed="1"/>
      <edge id="999" label="999" source="196" target="199" cy:directed="1"/>
      <edge id="998" label="998" source="196" target="197" cy:directed="1"/>
      <edge id="997" label="997" source="196" target="194" cy:directed="1"/>
      <edge id="996" label="996" source="196" target="193" cy:directed="1"/>
      <edge id="995" label="995" source="196" target="192" cy:directed="1"/>
      <edge id="994" label="994" source="195" target="200" cy:directed="1"/>
      <edge id="993" label="993" source="195" target="199" cy:directed="1"/>
      <edge id="992" label="992" source="195" target="197" cy:directed="1"/>
      <edge id="991" label="991" source="195" target="194" cy:directed="1"/>
      <edge id="990" label="990" source="195" target="193" cy:directed="1"/>
      <edge id="989" label="989" source="195" target="192" cy:directed="1"/>
      <edge id="988" label="988" source="194" target="192" cy:directed="1"/>
      <edge id="987" label="987" source="193" target="197" cy:directed="1"/>
      <edge id="986" label="986" source="193" target="194" cy:directed="1"/>
      <edge id="985" label="985" source="193" target="112" cy:directed="1"/>
      <edge id="984" label="984" source="193" target="111" cy:directed="1"/>
      <edge id="983" label="983" source="193" target="110" cy:directed="1"/>
      <edge id="982" label="982" source="193" target="192" cy:directed="1"/>
      <edge id="981" label="981" source="193" target="93" cy:directed="1"/>
      <edge id="980" label="980" source="192" target="112" cy:directed="1"/>
      <edge id="979" label="979" source="192" target="111" cy:directed="1"/>
      <edge id="978" label="978" source="192" target="110" cy:directed="1"/>
      <edge id="977" label="977" source="191" target="189" cy:directed="1"/>
      <edge id="976" label="976" source="191" target="188" cy:directed="1"/>
      <edge id="975" label="975" source="191" target="224" cy:directed="1"/>
      <edge id="974" label="974" source="190" target="191" cy:directed="1"/>
      <edge id="973" label="973" source="190" target="189" cy:directed="1"/>
      <edge id="972" label="972" source="190" target="188" cy:directed="1"/>
      <edge id="971" label="971" source="190" target="224" cy:directed="1"/>
      <edge id="970" label="970" source="189" target="188" cy:directed="1"/>
      <edge id="969" label="969" source="189" target="224" cy:directed="1"/>
      <edge id="968" label="968" source="187" target="184" cy:directed="1"/>
      <edge id="967" label="967" source="187" target="183" cy:directed="1"/>
      <edge id="966" label="966" source="187" target="182" cy:directed="1"/>
      <edge id="965" label="965" source="187" target="181" cy:directed="1"/>
      <edge id="964" label="964" source="187" target="180" cy:directed="1"/>
      <edge id="963" label="963" source="187" target="179" cy:directed="1"/>
      <edge id="962" label="962" source="187" target="81" cy:directed="1"/>
      <edge id="961" label="961" source="185" target="187" cy:directed="1"/>
      <edge id="960" label="960" source="185" target="186" cy:directed="1"/>
      <edge id="959" label="959" source="185" target="164" cy:directed="1"/>
      <edge id="958" label="958" source="185" target="184" cy:directed="1"/>
      <edge id="957" label="957" source="185" target="183" cy:directed="1"/>
      <edge id="956" label="956" source="185" target="181" cy:directed="1"/>
      <edge id="955" label="955" source="185" target="212" cy:directed="1"/>
      <edge id="954" label="954" source="184" target="186" cy:directed="1"/>
      <edge id="953" label="953" source="184" target="183" cy:directed="1"/>
      <edge id="952" label="952" source="184" target="182" cy:directed="1"/>
      <edge id="951" label="951" source="184" target="181" cy:directed="1"/>
      <edge id="950" label="950" source="184" target="180" cy:directed="1"/>
      <edge id="949" label="949" source="184" target="212" cy:directed="1"/>
      <edge id="948" label="948" source="183" target="186" cy:directed="1"/>
      <edge id="947" label="947" source="183" target="182" cy:directed="1"/>
      <edge id="946" label="946" source="183" target="180" cy:directed="1"/>
      <edge id="945" label="945" source="183" target="212" cy:directed="1"/>
      <edge id="944" label="944" source="182" target="186" cy:directed="1"/>
      <edge id="943" label="943" source="182" target="180" cy:directed="1"/>
      <edge id="942" label="942" source="182" target="212" cy:directed="1"/>
      <edge id="941" label="941" source="181" target="186" cy:directed="1"/>
      <edge id="940" label="940" source="181" target="183" cy:directed="1"/>
      <edge id="939" label="939" source="181" target="182" cy:directed="1"/>
      <edge id="938" label="938" source="181" target="180" cy:directed="1"/>
      <edge id="937" label="937" source="181" target="212" cy:directed="1"/>
      <edge id="936" label="936" source="180" target="186" cy:directed="1"/>
      <edge id="935" label="935" source="179" target="186" cy:directed="1"/>
      <edge id="934" label="934" source="179" target="184" cy:directed="1"/>
      <edge id="933" label="933" source="179" target="183" cy:directed="1"/>
      <edge id="932" label="932" source="179" target="182" cy:directed="1"/>
      <edge id="931" label="931" source="179" target="181" cy:directed="1"/>
      <edge id="930" label="930" source="179" target="180" cy:directed="1"/>
      <edge id="929" label="929" source="179" target="212" cy:directed="1"/>
      <edge id="928" label="928" source="179" target="81" cy:directed="1"/>
      <edge id="927" label="927" source="177" target="178" cy:directed="1"/>
      <edge id="926" label="926" source="176" target="178" cy:directed="1"/>
      <edge id="925" label="925" source="176" target="177" cy:directed="1"/>
      <edge id="924" label="924" source="175" target="178" cy:directed="1"/>
      <edge id="923" label="923" source="175" target="177" cy:directed="1"/>
      <edge id="922" label="922" source="175" target="176" cy:directed="1"/>
      <edge id="921" label="921" source="175" target="173" cy:directed="1"/>
      <edge id="920" label="920" source="175" target="218" cy:directed="1"/>
      <edge id="919" label="919" source="174" target="178" cy:directed="1"/>
      <edge id="918" label="918" source="174" target="177" cy:directed="1"/>
      <edge id="917" label="917" source="174" target="176" cy:directed="1"/>
      <edge id="916" label="916" source="174" target="175" cy:directed="1"/>
      <edge id="915" label="915" source="174" target="173" cy:directed="1"/>
      <edge id="914" label="914" source="174" target="218" cy:directed="1"/>
      <edge id="913" label="913" source="173" target="218" cy:directed="1"/>
      <edge id="912" label="912" source="172" target="168" cy:directed="1"/>
      <edge id="911" label="911" source="172" target="166" cy:directed="1"/>
      <edge id="910" label="910" source="172" target="216" cy:directed="1"/>
      <edge id="909" label="909" source="171" target="172" cy:directed="1"/>
      <edge id="908" label="908" source="171" target="169" cy:directed="1"/>
      <edge id="907" label="907" source="171" target="168" cy:directed="1"/>
      <edge id="906" label="906" source="171" target="167" cy:directed="1"/>
      <edge id="905" label="905" source="171" target="166" cy:directed="1"/>
      <edge id="904" label="904" source="171" target="165" cy:directed="1"/>
      <edge id="903" label="903" source="171" target="164" cy:directed="1"/>
      <edge id="902" label="902" source="171" target="216" cy:directed="1"/>
      <edge id="901" label="901" source="171" target="227" cy:directed="1"/>
      <edge id="900" label="900" source="170" target="172" cy:directed="1"/>
      <edge id="899" label="899" source="170" target="171" cy:directed="1"/>
      <edge id="898" label="898" source="170" target="168" cy:directed="1"/>
      <edge id="897" label="897" source="170" target="167" cy:directed="1"/>
      <edge id="896" label="896" source="170" target="166" cy:directed="1"/>
      <edge id="895" label="895" source="170" target="165" cy:directed="1"/>
      <edge id="894" label="894" source="170" target="129" cy:directed="1"/>
      <edge id="893" label="893" source="170" target="164" cy:directed="1"/>
      <edge id="892" label="892" source="170" target="124" cy:directed="1"/>
      <edge id="891" label="891" source="170" target="121" cy:directed="1"/>
      <edge id="890" label="890" source="170" target="216" cy:directed="1"/>
      <edge id="889" label="889" source="169" target="172" cy:directed="1"/>
      <edge id="888" label="888" source="169" target="216" cy:directed="1"/>
      <edge id="887" label="887" source="168" target="166" cy:directed="1"/>
      <edge id="886" label="886" source="168" target="216" cy:directed="1"/>
      <edge id="885" label="885" source="167" target="172" cy:directed="1"/>
      <edge id="884" label="884" source="167" target="169" cy:directed="1"/>
      <edge id="883" label="883" source="167" target="168" cy:directed="1"/>
      <edge id="882" label="882" source="167" target="166" cy:directed="1"/>
      <edge id="881" label="881" source="167" target="165" cy:directed="1"/>
      <edge id="880" label="880" source="167" target="164" cy:directed="1"/>
      <edge id="879" label="879" source="167" target="112" cy:directed="1"/>
      <edge id="878" label="878" source="167" target="111" cy:directed="1"/>
      <edge id="877" label="877" source="167" target="110" cy:directed="1"/>
      <edge id="876" label="876" source="167" target="216" cy:directed="1"/>
      <edge id="875" label="875" source="167" target="83" cy:directed="1"/>
      <edge id="874" label="874" source="166" target="216" cy:directed="1"/>
      <edge id="873" label="873" source="165" target="172" cy:directed="1"/>
      <edge id="872" label="872" source="165" target="168" cy:directed="1"/>
      <edge id="871" label="871" source="165" target="166" cy:directed="1"/>
      <edge id="870" label="870" source="165" target="164" cy:directed="1"/>
      <edge id="869" label="869" source="165" target="216" cy:directed="1"/>
      <edge id="868" label="868" source="164" target="172" cy:directed="1"/>
      <edge id="867" label="867" source="164" target="197" cy:directed="1"/>
      <edge id="866" label="866" source="164" target="168" cy:directed="1"/>
      <edge id="865" label="865" source="164" target="166" cy:directed="1"/>
      <edge id="864" label="864" source="164" target="194" cy:directed="1"/>
      <edge id="863" label="863" source="164" target="192" cy:directed="1"/>
      <edge id="862" label="862" source="164" target="216" cy:directed="1"/>
      <edge id="861" label="861" source="163" target="162" cy:directed="1"/>
      <edge id="860" label="860" source="163" target="160" cy:directed="1"/>
      <edge id="859" label="859" source="163" target="159" cy:directed="1"/>
      <edge id="858" label="858" source="162" target="159" cy:directed="1"/>
      <edge id="857" label="857" source="161" target="163" cy:directed="1"/>
      <edge id="856" label="856" source="161" target="162" cy:directed="1"/>
      <edge id="855" label="855" source="161" target="160" cy:directed="1"/>
      <edge id="854" label="854" source="161" target="159" cy:directed="1"/>
      <edge id="853" label="853" source="160" target="162" cy:directed="1"/>
      <edge id="852" label="852" source="160" target="159" cy:directed="1"/>
      <edge id="851" label="851" source="158" target="163" cy:directed="1"/>
      <edge id="850" label="850" source="158" target="162" cy:directed="1"/>
      <edge id="849" label="849" source="158" target="161" cy:directed="1"/>
      <edge id="848" label="848" source="158" target="160" cy:directed="1"/>
      <edge id="847" label="847" source="158" target="159" cy:directed="1"/>
      <edge id="846" label="846" source="158" target="157" cy:directed="1"/>
      <edge id="845" label="845" source="158" target="229" cy:directed="1"/>
      <edge id="844" label="844" source="157" target="163" cy:directed="1"/>
      <edge id="843" label="843" source="157" target="162" cy:directed="1"/>
      <edge id="842" label="842" source="157" target="161" cy:directed="1"/>
      <edge id="841" label="841" source="157" target="160" cy:directed="1"/>
      <edge id="840" label="840" source="157" target="159" cy:directed="1"/>
      <edge id="839" label="839" source="157" target="229" cy:directed="1"/>
      <edge id="838" label="838" source="155" target="156" cy:directed="1"/>
      <edge id="837" label="837" source="155" target="213" cy:directed="1"/>
      <edge id="836" label="836" source="154" target="156" cy:directed="1"/>
      <edge id="835" label="835" source="154" target="155" cy:directed="1"/>
      <edge id="834" label="834" source="154" target="213" cy:directed="1"/>
      <edge id="833" label="833" source="153" target="150" cy:directed="1"/>
      <edge id="832" label="832" source="153" target="228" cy:directed="1"/>
      <edge id="831" label="831" source="153" target="78" cy:directed="1"/>
      <edge id="830" label="830" source="153" target="71" cy:directed="1"/>
      <edge id="829" label="829" source="152" target="153" cy:directed="1"/>
      <edge id="828" label="828" source="152" target="151" cy:directed="1"/>
      <edge id="827" label="827" source="152" target="150" cy:directed="1"/>
      <edge id="826" label="826" source="152" target="149" cy:directed="1"/>
      <edge id="825" label="825" source="152" target="148" cy:directed="1"/>
      <edge id="824" label="824" source="151" target="153" cy:directed="1"/>
      <edge id="823" label="823" source="151" target="150" cy:directed="1"/>
      <edge id="822" label="822" source="151" target="228" cy:directed="1"/>
      <edge id="821" label="821" source="149" target="153" cy:directed="1"/>
      <edge id="820" label="820" source="149" target="151" cy:directed="1"/>
      <edge id="819" label="819" source="149" target="150" cy:directed="1"/>
      <edge id="818" label="818" source="149" target="147" cy:directed="1"/>
      <edge id="817" label="817" source="149" target="228" cy:directed="1"/>
      <edge id="816" label="816" source="149" target="76" cy:directed="1"/>
      <edge id="815" label="815" source="149" target="71" cy:directed="1"/>
      <edge id="814" label="814" source="148" target="153" cy:directed="1"/>
      <edge id="813" label="813" source="148" target="151" cy:directed="1"/>
      <edge id="812" label="812" source="148" target="150" cy:directed="1"/>
      <edge id="811" label="811" source="148" target="149" cy:directed="1"/>
      <edge id="810" label="810" source="148" target="147" cy:directed="1"/>
      <edge id="809" label="809" source="148" target="228" cy:directed="1"/>
      <edge id="808" label="808" source="148" target="76" cy:directed="1"/>
      <edge id="807" label="807" source="148" target="71" cy:directed="1"/>
      <edge id="806" label="806" source="147" target="153" cy:directed="1"/>
      <edge id="805" label="805" source="147" target="151" cy:directed="1"/>
      <edge id="804" label="804" source="147" target="150" cy:directed="1"/>
      <edge id="803" label="803" source="147" target="228" cy:directed="1"/>
      <edge id="802" label="802" source="147" target="78" cy:directed="1"/>
      <edge id="801" label="801" source="147" target="76" cy:directed="1"/>
      <edge id="800" label="800" source="147" target="74" cy:directed="1"/>
      <edge id="799" label="799" source="147" target="73" cy:directed="1"/>
      <edge id="798" label="798" source="147" target="71" cy:directed="1"/>
      <edge id="797" label="797" source="147" target="70" cy:directed="1"/>
      <edge id="796" label="796" source="147" target="215" cy:directed="1"/>
      <edge id="795" label="795" source="145" target="140" cy:directed="1"/>
      <edge id="794" label="794" source="144" target="146" cy:directed="1"/>
      <edge id="793" label="793" source="144" target="145" cy:directed="1"/>
      <edge id="792" label="792" source="144" target="141" cy:directed="1"/>
      <edge id="791" label="791" source="144" target="87" cy:directed="1"/>
      <edge id="790" label="790" source="144" target="140" cy:directed="1"/>
      <edge id="789" label="789" source="143" target="146" cy:directed="1"/>
      <edge id="788" label="788" source="143" target="145" cy:directed="1"/>
      <edge id="787" label="787" source="143" target="129" cy:directed="1"/>
      <edge id="786" label="786" source="143" target="144" cy:directed="1"/>
      <edge id="785" label="785" source="143" target="124" cy:directed="1"/>
      <edge id="784" label="784" source="143" target="142" cy:directed="1"/>
      <edge id="783" label="783" source="143" target="141" cy:directed="1"/>
      <edge id="782" label="782" source="143" target="123" cy:directed="1"/>
      <edge id="781" label="781" source="143" target="122" cy:directed="1"/>
      <edge id="780" label="780" source="143" target="121" cy:directed="1"/>
      <edge id="779" label="779" source="143" target="140" cy:directed="1"/>
      <edge id="778" label="778" source="143" target="173" cy:directed="1"/>
      <edge id="777" label="777" source="143" target="139" cy:directed="1"/>
      <edge id="776" label="776" source="143" target="218" cy:directed="1"/>
      <edge id="775" label="775" source="143" target="219" cy:directed="1"/>
      <edge id="774" label="774" source="142" target="145" cy:directed="1"/>
      <edge id="773" label="773" source="142" target="128" cy:directed="1"/>
      <edge id="772" label="772" source="142" target="144" cy:directed="1"/>
      <edge id="771" label="771" source="142" target="141" cy:directed="1"/>
      <edge id="770" label="770" source="142" target="140" cy:directed="1"/>
      <edge id="769" label="769" source="142" target="139" cy:directed="1"/>
      <edge id="768" label="768" source="142" target="219" cy:directed="1"/>
      <edge id="767" label="767" source="141" target="145" cy:directed="1"/>
      <edge id="766" label="766" source="141" target="140" cy:directed="1"/>
      <edge id="765" label="765" source="139" target="145" cy:directed="1"/>
      <edge id="764" label="764" source="139" target="144" cy:directed="1"/>
      <edge id="763" label="763" source="139" target="141" cy:directed="1"/>
      <edge id="762" label="762" source="139" target="140" cy:directed="1"/>
      <edge id="761" label="761" source="137" target="136" cy:directed="1"/>
      <edge id="760" label="760" source="137" target="135" cy:directed="1"/>
      <edge id="759" label="759" source="137" target="133" cy:directed="1"/>
      <edge id="758" label="758" source="137" target="131" cy:directed="1"/>
      <edge id="757" label="757" source="137" target="100" cy:directed="1"/>
      <edge id="756" label="756" source="137" target="130" cy:directed="1"/>
      <edge id="755" label="755" source="137" target="214" cy:directed="1"/>
      <edge id="754" label="754" source="137" target="97" cy:directed="1"/>
      <edge id="753" label="753" source="137" target="67" cy:directed="1"/>
      <edge id="752" label="752" source="137" target="63" cy:directed="1"/>
      <edge id="751" label="751" source="137" target="62" cy:directed="1"/>
      <edge id="750" label="750" source="137" target="210" cy:directed="1"/>
      <edge id="749" label="749" source="136" target="131" cy:directed="1"/>
      <edge id="748" label="748" source="135" target="136" cy:directed="1"/>
      <edge id="747" label="747" source="135" target="133" cy:directed="1"/>
      <edge id="746" label="746" source="135" target="132" cy:directed="1"/>
      <edge id="745" label="745" source="135" target="131" cy:directed="1"/>
      <edge id="744" label="744" source="135" target="130" cy:directed="1"/>
      <edge id="743" label="743" source="135" target="214" cy:directed="1"/>
      <edge id="742" label="742" source="135" target="97" cy:directed="1"/>
      <edge id="741" label="741" source="135" target="68" cy:directed="1"/>
      <edge id="740" label="740" source="135" target="62" cy:directed="1"/>
      <edge id="739" label="739" source="134" target="137" cy:directed="1"/>
      <edge id="738" label="738" source="134" target="136" cy:directed="1"/>
      <edge id="737" label="737" source="134" target="135" cy:directed="1"/>
      <edge id="736" label="736" source="134" target="133" cy:directed="1"/>
      <edge id="735" label="735" source="134" target="132" cy:directed="1"/>
      <edge id="734" label="734" source="134" target="131" cy:directed="1"/>
      <edge id="733" label="733" source="134" target="100" cy:directed="1"/>
      <edge id="732" label="732" source="134" target="130" cy:directed="1"/>
      <edge id="731" label="731" source="134" target="214" cy:directed="1"/>
      <edge id="730" label="730" source="134" target="97" cy:directed="1"/>
      <edge id="729" label="729" source="134" target="68" cy:directed="1"/>
      <edge id="728" label="728" source="134" target="62" cy:directed="1"/>
      <edge id="727" label="727" source="133" target="136" cy:directed="1"/>
      <edge id="726" label="726" source="133" target="131" cy:directed="1"/>
      <edge id="725" label="725" source="133" target="130" cy:directed="1"/>
      <edge id="724" label="724" source="133" target="62" cy:directed="1"/>
      <edge id="723" label="723" source="132" target="133" cy:directed="1"/>
      <edge id="722" label="722" source="132" target="214" cy:directed="1"/>
      <edge id="721" label="721" source="131" target="210" cy:directed="1"/>
      <edge id="720" label="720" source="130" target="131" cy:directed="1"/>
      <edge id="719" label="719" source="130" target="63" cy:directed="1"/>
      <edge id="718" label="718" source="130" target="62" cy:directed="1"/>
      <edge id="717" label="717" source="130" target="210" cy:directed="1"/>
      <edge id="716" label="716" source="129" target="146" cy:directed="1"/>
      <edge id="715" label="715" source="129" target="128" cy:directed="1"/>
      <edge id="714" label="714" source="129" target="127" cy:directed="1"/>
      <edge id="713" label="713" source="129" target="125" cy:directed="1"/>
      <edge id="712" label="712" source="129" target="119" cy:directed="1"/>
      <edge id="711" label="711" source="129" target="144" cy:directed="1"/>
      <edge id="710" label="710" source="129" target="124" cy:directed="1"/>
      <edge id="709" label="709" source="129" target="123" cy:directed="1"/>
      <edge id="708" label="708" source="129" target="122" cy:directed="1"/>
      <edge id="707" label="707" source="129" target="121" cy:directed="1"/>
      <edge id="706" label="706" source="129" target="95" cy:directed="1"/>
      <edge id="705" label="705" source="129" target="94" cy:directed="1"/>
      <edge id="704" label="704" source="129" target="93" cy:directed="1"/>
      <edge id="703" label="703" source="129" target="92" cy:directed="1"/>
      <edge id="702" label="702" source="129" target="91" cy:directed="1"/>
      <edge id="701" label="701" source="129" target="90" cy:directed="1"/>
      <edge id="700" label="700" source="129" target="89" cy:directed="1"/>
      <edge id="699" label="699" source="129" target="222" cy:directed="1"/>
      <edge id="698" label="698" source="129" target="88" cy:directed="1"/>
      <edge id="697" label="697" source="129" target="225" cy:directed="1"/>
      <edge id="696" label="696" source="128" target="145" cy:directed="1"/>
      <edge id="695" label="695" source="128" target="125" cy:directed="1"/>
      <edge id="694" label="694" source="128" target="124" cy:directed="1"/>
      <edge id="693" label="693" source="128" target="141" cy:directed="1"/>
      <edge id="692" label="692" source="128" target="123" cy:directed="1"/>
      <edge id="691" label="691" source="128" target="121" cy:directed="1"/>
      <edge id="690" label="690" source="128" target="140" cy:directed="1"/>
      <edge id="689" label="689" source="128" target="93" cy:directed="1"/>
      <edge id="688" label="688" source="128" target="92" cy:directed="1"/>
      <edge id="687" label="687" source="128" target="91" cy:directed="1"/>
      <edge id="686" label="686" source="128" target="90" cy:directed="1"/>
      <edge id="685" label="685" source="128" target="89" cy:directed="1"/>
      <edge id="684" label="684" source="128" target="222" cy:directed="1"/>
      <edge id="683" label="683" source="128" target="225" cy:directed="1"/>
      <edge id="682" label="682" source="127" target="145" cy:directed="1"/>
      <edge id="681" label="681" source="127" target="128" cy:directed="1"/>
      <edge id="680" label="680" source="127" target="125" cy:directed="1"/>
      <edge id="679" label="679" source="127" target="124" cy:directed="1"/>
      <edge id="678" label="678" source="127" target="142" cy:directed="1"/>
      <edge id="677" label="677" source="127" target="141" cy:directed="1"/>
      <edge id="676" label="676" source="127" target="118" cy:directed="1"/>
      <edge id="675" label="675" source="127" target="123" cy:directed="1"/>
      <edge id="674" label="674" source="127" target="121" cy:directed="1"/>
      <edge id="673" label="673" source="127" target="140" cy:directed="1"/>
      <edge id="672" label="672" source="127" target="139" cy:directed="1"/>
      <edge id="671" label="671" source="127" target="95" cy:directed="1"/>
      <edge id="670" label="670" source="127" target="94" cy:directed="1"/>
      <edge id="669" label="669" source="127" target="93" cy:directed="1"/>
      <edge id="668" label="668" source="127" target="92" cy:directed="1"/>
      <edge id="667" label="667" source="127" target="91" cy:directed="1"/>
      <edge id="666" label="666" source="127" target="90" cy:directed="1"/>
      <edge id="665" label="665" source="127" target="89" cy:directed="1"/>
      <edge id="664" label="664" source="127" target="222" cy:directed="1"/>
      <edge id="663" label="663" source="127" target="225" cy:directed="1"/>
      <edge id="662" label="662" source="126" target="129" cy:directed="1"/>
      <edge id="661" label="661" source="126" target="128" cy:directed="1"/>
      <edge id="660" label="660" source="126" target="124" cy:directed="1"/>
      <edge id="659" label="659" source="126" target="123" cy:directed="1"/>
      <edge id="658" label="658" source="126" target="122" cy:directed="1"/>
      <edge id="657" label="657" source="126" target="121" cy:directed="1"/>
      <edge id="656" label="656" source="126" target="225" cy:directed="1"/>
      <edge id="655" label="655" source="125" target="124" cy:directed="1"/>
      <edge id="654" label="654" source="125" target="123" cy:directed="1"/>
      <edge id="653" label="653" source="125" target="121" cy:directed="1"/>
      <edge id="652" label="652" source="125" target="93" cy:directed="1"/>
      <edge id="651" label="651" source="125" target="222" cy:directed="1"/>
      <edge id="650" label="650" source="125" target="225" cy:directed="1"/>
      <edge id="649" label="649" source="124" target="146" cy:directed="1"/>
      <edge id="648" label="648" source="124" target="144" cy:directed="1"/>
      <edge id="647" label="647" source="124" target="122" cy:directed="1"/>
      <edge id="646" label="646" source="124" target="121" cy:directed="1"/>
      <edge id="645" label="645" source="124" target="93" cy:directed="1"/>
      <edge id="644" label="644" source="124" target="92" cy:directed="1"/>
      <edge id="643" label="643" source="124" target="222" cy:directed="1"/>
      <edge id="642" label="642" source="123" target="146" cy:directed="1"/>
      <edge id="641" label="641" source="123" target="144" cy:directed="1"/>
      <edge id="640" label="640" source="123" target="124" cy:directed="1"/>
      <edge id="639" label="639" source="123" target="122" cy:directed="1"/>
      <edge id="638" label="638" source="123" target="121" cy:directed="1"/>
      <edge id="637" label="637" source="123" target="93" cy:directed="1"/>
      <edge id="636" label="636" source="123" target="92" cy:directed="1"/>
      <edge id="635" label="635" source="123" target="91" cy:directed="1"/>
      <edge id="634" label="634" source="123" target="89" cy:directed="1"/>
      <edge id="633" label="633" source="123" target="222" cy:directed="1"/>
      <edge id="632" label="632" source="121" target="146" cy:directed="1"/>
      <edge id="631" label="631" source="121" target="144" cy:directed="1"/>
      <edge id="630" label="630" source="121" target="122" cy:directed="1"/>
      <edge id="629" label="629" source="121" target="93" cy:directed="1"/>
      <edge id="628" label="628" source="121" target="92" cy:directed="1"/>
      <edge id="627" label="627" source="119" target="124" cy:directed="1"/>
      <edge id="626" label="626" source="118" target="119" cy:directed="1"/>
      <edge id="625" label="625" source="118" target="116" cy:directed="1"/>
      <edge id="624" label="624" source="117" target="120" cy:directed="1"/>
      <edge id="623" label="623" source="117" target="96" cy:directed="1"/>
      <edge id="622" label="622" source="117" target="116" cy:directed="1"/>
      <edge id="621" label="621" source="116" target="120" cy:directed="1"/>
      <edge id="620" label="620" source="116" target="119" cy:directed="1"/>
      <edge id="619" label="619" source="116" target="93" cy:directed="1"/>
      <edge id="618" label="618" source="116" target="92" cy:directed="1"/>
      <edge id="617" label="617" source="116" target="91" cy:directed="1"/>
      <edge id="616" label="616" source="116" target="89" cy:directed="1"/>
      <edge id="615" label="615" source="116" target="225" cy:directed="1"/>
      <edge id="614" label="614" source="115" target="120" cy:directed="1"/>
      <edge id="613" label="613" source="115" target="119" cy:directed="1"/>
      <edge id="612" label="612" source="115" target="118" cy:directed="1"/>
      <edge id="611" label="611" source="115" target="117" cy:directed="1"/>
      <edge id="610" label="610" source="115" target="116" cy:directed="1"/>
      <edge id="609" label="609" source="115" target="95" cy:directed="1"/>
      <edge id="608" label="608" source="115" target="94" cy:directed="1"/>
      <edge id="607" label="607" source="115" target="93" cy:directed="1"/>
      <edge id="606" label="606" source="115" target="92" cy:directed="1"/>
      <edge id="605" label="605" source="115" target="91" cy:directed="1"/>
      <edge id="604" label="604" source="115" target="90" cy:directed="1"/>
      <edge id="603" label="603" source="115" target="89" cy:directed="1"/>
      <edge id="602" label="602" source="115" target="88" cy:directed="1"/>
      <edge id="601" label="601" source="115" target="217" cy:directed="1"/>
      <edge id="600" label="600" source="115" target="225" cy:directed="1"/>
      <edge id="599" label="599" source="114" target="112" cy:directed="1"/>
      <edge id="598" label="598" source="114" target="111" cy:directed="1"/>
      <edge id="597" label="597" source="114" target="110" cy:directed="1"/>
      <edge id="596" label="596" source="113" target="114" cy:directed="1"/>
      <edge id="595" label="595" source="113" target="112" cy:directed="1"/>
      <edge id="594" label="594" source="113" target="111" cy:directed="1"/>
      <edge id="593" label="593" source="113" target="110" cy:directed="1"/>
      <edge id="592" label="592" source="113" target="109" cy:directed="1"/>
      <edge id="591" label="591" source="112" target="111" cy:directed="1"/>
      <edge id="590" label="590" source="110" target="112" cy:directed="1"/>
      <edge id="589" label="589" source="110" target="111" cy:directed="1"/>
      <edge id="588" label="588" source="109" target="114" cy:directed="1"/>
      <edge id="587" label="587" source="109" target="112" cy:directed="1"/>
      <edge id="586" label="586" source="109" target="111" cy:directed="1"/>
      <edge id="585" label="585" source="109" target="110" cy:directed="1"/>
      <edge id="584" label="584" source="108" target="114" cy:directed="1"/>
      <edge id="583" label="583" source="108" target="113" cy:directed="1"/>
      <edge id="582" label="582" source="108" target="112" cy:directed="1"/>
      <edge id="581" label="581" source="108" target="111" cy:directed="1"/>
      <edge id="580" label="580" source="108" target="110" cy:directed="1"/>
      <edge id="579" label="579" source="108" target="109" cy:directed="1"/>
      <edge id="578" label="578" source="107" target="114" cy:directed="1"/>
      <edge id="577" label="577" source="107" target="113" cy:directed="1"/>
      <edge id="576" label="576" source="107" target="112" cy:directed="1"/>
      <edge id="575" label="575" source="107" target="111" cy:directed="1"/>
      <edge id="574" label="574" source="107" target="110" cy:directed="1"/>
      <edge id="573" label="573" source="107" target="109" cy:directed="1"/>
      <edge id="572" label="572" source="107" target="108" cy:directed="1"/>
      <edge id="571" label="571" source="106" target="114" cy:directed="1"/>
      <edge id="570" label="570" source="106" target="113" cy:directed="1"/>
      <edge id="569" label="569" source="106" target="112" cy:directed="1"/>
      <edge id="568" label="568" source="106" target="111" cy:directed="1"/>
      <edge id="567" label="567" source="106" target="110" cy:directed="1"/>
      <edge id="566" label="566" source="106" target="109" cy:directed="1"/>
      <edge id="565" label="565" source="106" target="108" cy:directed="1"/>
      <edge id="564" label="564" source="106" target="107" cy:directed="1"/>
      <edge id="563" label="563" source="105" target="104" cy:directed="1"/>
      <edge id="562" label="562" source="105" target="103" cy:directed="1"/>
      <edge id="561" label="561" source="105" target="101" cy:directed="1"/>
      <edge id="560" label="560" source="105" target="99" cy:directed="1"/>
      <edge id="559" label="559" source="105" target="98" cy:directed="1"/>
      <edge id="558" label="558" source="105" target="97" cy:directed="1"/>
      <edge id="557" label="557" source="105" target="211" cy:directed="1"/>
      <edge id="556" label="556" source="105" target="67" cy:directed="1"/>
      <edge id="555" label="555" source="105" target="66" cy:directed="1"/>
      <edge id="554" label="554" source="105" target="65" cy:directed="1"/>
      <edge id="553" label="553" source="104" target="101" cy:directed="1"/>
      <edge id="552" label="552" source="104" target="99" cy:directed="1"/>
      <edge id="551" label="551" source="104" target="98" cy:directed="1"/>
      <edge id="550" label="550" source="104" target="97" cy:directed="1"/>
      <edge id="549" label="549" source="104" target="211" cy:directed="1"/>
      <edge id="548" label="548" source="104" target="67" cy:directed="1"/>
      <edge id="547" label="547" source="104" target="62" cy:directed="1"/>
      <edge id="546" label="546" source="103" target="104" cy:directed="1"/>
      <edge id="545" label="545" source="103" target="101" cy:directed="1"/>
      <edge id="544" label="544" source="103" target="99" cy:directed="1"/>
      <edge id="543" label="543" source="103" target="98" cy:directed="1"/>
      <edge id="542" label="542" source="103" target="97" cy:directed="1"/>
      <edge id="541" label="541" source="103" target="211" cy:directed="1"/>
      <edge id="540" label="540" source="103" target="67" cy:directed="1"/>
      <edge id="539" label="539" source="103" target="62" cy:directed="1"/>
      <edge id="538" label="538" source="102" target="105" cy:directed="1"/>
      <edge id="537" label="537" source="102" target="104" cy:directed="1"/>
      <edge id="536" label="536" source="102" target="103" cy:directed="1"/>
      <edge id="535" label="535" source="102" target="101" cy:directed="1"/>
      <edge id="534" label="534" source="102" target="100" cy:directed="1"/>
      <edge id="533" label="533" source="102" target="99" cy:directed="1"/>
      <edge id="532" label="532" source="102" target="98" cy:directed="1"/>
      <edge id="531" label="531" source="102" target="97" cy:directed="1"/>
      <edge id="530" label="530" source="102" target="211" cy:directed="1"/>
      <edge id="529" label="529" source="102" target="67" cy:directed="1"/>
      <edge id="528" label="528" source="102" target="62" cy:directed="1"/>
      <edge id="527" label="527" source="101" target="98" cy:directed="1"/>
      <edge id="526" label="526" source="101" target="211" cy:directed="1"/>
      <edge id="525" label="525" source="101" target="67" cy:directed="1"/>
      <edge id="524" label="524" source="101" target="62" cy:directed="1"/>
      <edge id="523" label="523" source="100" target="135" cy:directed="1"/>
      <edge id="522" label="522" source="100" target="133" cy:directed="1"/>
      <edge id="521" label="521" source="100" target="104" cy:directed="1"/>
      <edge id="520" label="520" source="100" target="103" cy:directed="1"/>
      <edge id="519" label="519" source="100" target="131" cy:directed="1"/>
      <edge id="518" label="518" source="100" target="101" cy:directed="1"/>
      <edge id="517" label="517" source="100" target="130" cy:directed="1"/>
      <edge id="516" label="516" source="100" target="99" cy:directed="1"/>
      <edge id="515" label="515" source="100" target="98" cy:directed="1"/>
      <edge id="514" label="514" source="100" target="97" cy:directed="1"/>
      <edge id="513" label="513" source="100" target="220" cy:directed="1"/>
      <edge id="512" label="512" source="100" target="67" cy:directed="1"/>
      <edge id="511" label="511" source="100" target="65" cy:directed="1"/>
      <edge id="510" label="510" source="100" target="63" cy:directed="1"/>
      <edge id="509" label="509" source="100" target="62" cy:directed="1"/>
      <edge id="508" label="508" source="100" target="210" cy:directed="1"/>
      <edge id="507" label="507" source="99" target="101" cy:directed="1"/>
      <edge id="506" label="506" source="99" target="98" cy:directed="1"/>
      <edge id="505" label="505" source="99" target="97" cy:directed="1"/>
      <edge id="504" label="504" source="99" target="211" cy:directed="1"/>
      <edge id="503" label="503" source="99" target="67" cy:directed="1"/>
      <edge id="502" label="502" source="99" target="62" cy:directed="1"/>
      <edge id="501" label="501" source="98" target="211" cy:directed="1"/>
      <edge id="500" label="500" source="98" target="62" cy:directed="1"/>
      <edge id="499" label="499" source="97" target="133" cy:directed="1"/>
      <edge id="498" label="498" source="97" target="131" cy:directed="1"/>
      <edge id="497" label="497" source="97" target="101" cy:directed="1"/>
      <edge id="496" label="496" source="97" target="130" cy:directed="1"/>
      <edge id="495" label="495" source="97" target="214" cy:directed="1"/>
      <edge id="494" label="494" source="97" target="98" cy:directed="1"/>
      <edge id="493" label="493" source="97" target="211" cy:directed="1"/>
      <edge id="492" label="492" source="97" target="67" cy:directed="1"/>
      <edge id="491" label="491" source="97" target="63" cy:directed="1"/>
      <edge id="490" label="490" source="97" target="62" cy:directed="1"/>
      <edge id="489" label="489" source="97" target="210" cy:directed="1"/>
      <edge id="488" label="488" source="96" target="120" cy:directed="1"/>
      <edge id="487" label="487" source="96" target="93" cy:directed="1"/>
      <edge id="486" label="486" source="96" target="92" cy:directed="1"/>
      <edge id="485" label="485" source="96" target="91" cy:directed="1"/>
      <edge id="484" label="484" source="96" target="89" cy:directed="1"/>
      <edge id="483" label="483" source="95" target="128" cy:directed="1"/>
      <edge id="482" label="482" source="95" target="124" cy:directed="1"/>
      <edge id="481" label="481" source="95" target="123" cy:directed="1"/>
      <edge id="480" label="480" source="95" target="121" cy:directed="1"/>
      <edge id="479" label="479" source="95" target="96" cy:directed="1"/>
      <edge id="478" label="478" source="95" target="116" cy:directed="1"/>
      <edge id="477" label="477" source="95" target="94" cy:directed="1"/>
      <edge id="476" label="476" source="95" target="93" cy:directed="1"/>
      <edge id="475" label="475" source="95" target="92" cy:directed="1"/>
      <edge id="474" label="474" source="95" target="91" cy:directed="1"/>
      <edge id="473" label="473" source="95" target="90" cy:directed="1"/>
      <edge id="472" label="472" source="95" target="89" cy:directed="1"/>
      <edge id="471" label="471" source="95" target="225" cy:directed="1"/>
      <edge id="470" label="470" source="94" target="199" cy:directed="1"/>
      <edge id="469" label="469" source="94" target="128" cy:directed="1"/>
      <edge id="468" label="468" source="94" target="125" cy:directed="1"/>
      <edge id="467" label="467" source="94" target="124" cy:directed="1"/>
      <edge id="466" label="466" source="94" target="123" cy:directed="1"/>
      <edge id="465" label="465" source="94" target="193" cy:directed="1"/>
      <edge id="464" label="464" source="94" target="121" cy:directed="1"/>
      <edge id="463" label="463" source="94" target="96" cy:directed="1"/>
      <edge id="462" label="462" source="94" target="116" cy:directed="1"/>
      <edge id="461" label="461" source="94" target="93" cy:directed="1"/>
      <edge id="460" label="460" source="94" target="92" cy:directed="1"/>
      <edge id="459" label="459" source="94" target="91" cy:directed="1"/>
      <edge id="458" label="458" source="94" target="90" cy:directed="1"/>
      <edge id="457" label="457" source="94" target="89" cy:directed="1"/>
      <edge id="456" label="456" source="94" target="222" cy:directed="1"/>
      <edge id="455" label="455" source="94" target="225" cy:directed="1"/>
      <edge id="454" label="454" source="93" target="92" cy:directed="1"/>
      <edge id="453" label="453" source="91" target="124" cy:directed="1"/>
      <edge id="452" label="452" source="91" target="121" cy:directed="1"/>
      <edge id="451" label="451" source="91" target="93" cy:directed="1"/>
      <edge id="450" label="450" source="91" target="92" cy:directed="1"/>
      <edge id="449" label="449" source="91" target="89" cy:directed="1"/>
      <edge id="448" label="448" source="90" target="124" cy:directed="1"/>
      <edge id="447" label="447" source="90" target="123" cy:directed="1"/>
      <edge id="446" label="446" source="90" target="121" cy:directed="1"/>
      <edge id="445" label="445" source="90" target="96" cy:directed="1"/>
      <edge id="444" label="444" source="90" target="116" cy:directed="1"/>
      <edge id="443" label="443" source="90" target="93" cy:directed="1"/>
      <edge id="442" label="442" source="90" target="92" cy:directed="1"/>
      <edge id="441" label="441" source="90" target="91" cy:directed="1"/>
      <edge id="440" label="440" source="90" target="89" cy:directed="1"/>
      <edge id="439" label="439" source="90" target="225" cy:directed="1"/>
      <edge id="438" label="438" source="89" target="124" cy:directed="1"/>
      <edge id="437" label="437" source="89" target="121" cy:directed="1"/>
      <edge id="436" label="436" source="89" target="93" cy:directed="1"/>
      <edge id="435" label="435" source="89" target="92" cy:directed="1"/>
      <edge id="434" label="434" source="88" target="128" cy:directed="1"/>
      <edge id="433" label="433" source="88" target="127" cy:directed="1"/>
      <edge id="432" label="432" source="88" target="120" cy:directed="1"/>
      <edge id="431" label="431" source="88" target="125" cy:directed="1"/>
      <edge id="430" label="430" source="88" target="124" cy:directed="1"/>
      <edge id="429" label="429" source="88" target="123" cy:directed="1"/>
      <edge id="428" label="428" source="88" target="117" cy:directed="1"/>
      <edge id="427" label="427" source="88" target="121" cy:directed="1"/>
      <edge id="426" label="426" source="88" target="96" cy:directed="1"/>
      <edge id="425" label="425" source="88" target="116" cy:directed="1"/>
      <edge id="424" label="424" source="88" target="95" cy:directed="1"/>
      <edge id="423" label="423" source="88" target="94" cy:directed="1"/>
      <edge id="422" label="422" source="88" target="93" cy:directed="1"/>
      <edge id="421" label="421" source="88" target="92" cy:directed="1"/>
      <edge id="420" label="420" source="88" target="91" cy:directed="1"/>
      <edge id="419" label="419" source="88" target="219" cy:directed="1"/>
      <edge id="418" label="418" source="88" target="90" cy:directed="1"/>
      <edge id="417" label="417" source="88" target="89" cy:directed="1"/>
      <edge id="416" label="416" source="88" target="222" cy:directed="1"/>
      <edge id="415" label="415" source="88" target="217" cy:directed="1"/>
      <edge id="414" label="414" source="88" target="225" cy:directed="1"/>
      <edge id="413" label="413" source="87" target="86" cy:directed="1"/>
      <edge id="412" label="412" source="87" target="81" cy:directed="1"/>
      <edge id="411" label="411" source="86" target="81" cy:directed="1"/>
      <edge id="410" label="410" source="85" target="187" cy:directed="1"/>
      <edge id="409" label="409" source="85" target="164" cy:directed="1"/>
      <edge id="408" label="408" source="85" target="87" cy:directed="1"/>
      <edge id="407" label="407" source="85" target="86" cy:directed="1"/>
      <edge id="406" label="406" source="85" target="84" cy:directed="1"/>
      <edge id="405" label="405" source="85" target="81" cy:directed="1"/>
      <edge id="404" label="404" source="84" target="87" cy:directed="1"/>
      <edge id="403" label="403" source="84" target="86" cy:directed="1"/>
      <edge id="402" label="402" source="84" target="81" cy:directed="1"/>
      <edge id="401" label="401" source="83" target="87" cy:directed="1"/>
      <edge id="400" label="400" source="83" target="86" cy:directed="1"/>
      <edge id="399" label="399" source="83" target="85" cy:directed="1"/>
      <edge id="398" label="398" source="83" target="84" cy:directed="1"/>
      <edge id="397" label="397" source="83" target="81" cy:directed="1"/>
      <edge id="396" label="396" source="82" target="184" cy:directed="1"/>
      <edge id="395" label="395" source="82" target="183" cy:directed="1"/>
      <edge id="394" label="394" source="82" target="87" cy:directed="1"/>
      <edge id="393" label="393" source="82" target="86" cy:directed="1"/>
      <edge id="392" label="392" source="82" target="181" cy:directed="1"/>
      <edge id="391" label="391" source="82" target="85" cy:directed="1"/>
      <edge id="390" label="390" source="82" target="180" cy:directed="1"/>
      <edge id="389" label="389" source="82" target="84" cy:directed="1"/>
      <edge id="388" label="388" source="82" target="83" cy:directed="1"/>
      <edge id="387" label="387" source="82" target="81" cy:directed="1"/>
      <edge id="386" label="386" source="82" target="80" cy:directed="1"/>
      <edge id="385" label="385" source="81" target="186" cy:directed="1"/>
      <edge id="384" label="384" source="81" target="184" cy:directed="1"/>
      <edge id="383" label="383" source="81" target="183" cy:directed="1"/>
      <edge id="382" label="382" source="81" target="182" cy:directed="1"/>
      <edge id="381" label="381" source="81" target="181" cy:directed="1"/>
      <edge id="380" label="380" source="81" target="180" cy:directed="1"/>
      <edge id="379" label="379" source="80" target="186" cy:directed="1"/>
      <edge id="378" label="378" source="80" target="184" cy:directed="1"/>
      <edge id="377" label="377" source="80" target="183" cy:directed="1"/>
      <edge id="376" label="376" source="80" target="87" cy:directed="1"/>
      <edge id="375" label="375" source="80" target="86" cy:directed="1"/>
      <edge id="374" label="374" source="80" target="182" cy:directed="1"/>
      <edge id="373" label="373" source="80" target="181" cy:directed="1"/>
      <edge id="372" label="372" source="80" target="85" cy:directed="1"/>
      <edge id="371" label="371" source="80" target="84" cy:directed="1"/>
      <edge id="370" label="370" source="80" target="212" cy:directed="1"/>
      <edge id="369" label="369" source="80" target="83" cy:directed="1"/>
      <edge id="368" label="368" source="80" target="81" cy:directed="1"/>
      <edge id="367" label="367" source="79" target="87" cy:directed="1"/>
      <edge id="366" label="366" source="79" target="86" cy:directed="1"/>
      <edge id="365" label="365" source="79" target="85" cy:directed="1"/>
      <edge id="364" label="364" source="79" target="84" cy:directed="1"/>
      <edge id="363" label="363" source="79" target="83" cy:directed="1"/>
      <edge id="362" label="362" source="79" target="82" cy:directed="1"/>
      <edge id="361" label="361" source="79" target="81" cy:directed="1"/>
      <edge id="360" label="360" source="79" target="80" cy:directed="1"/>
      <edge id="359" label="359" source="79" target="227" cy:directed="1"/>
      <edge id="358" label="358" source="78" target="77" cy:directed="1"/>
      <edge id="357" label="357" source="78" target="76" cy:directed="1"/>
      <edge id="356" label="356" source="78" target="75" cy:directed="1"/>
      <edge id="355" label="355" source="78" target="73" cy:directed="1"/>
      <edge id="354" label="354" source="78" target="71" cy:directed="1"/>
      <edge id="353" label="353" source="78" target="70" cy:directed="1"/>
      <edge id="352" label="352" source="78" target="215" cy:directed="1"/>
      <edge id="351" label="351" source="77" target="76" cy:directed="1"/>
      <edge id="350" label="350" source="77" target="75" cy:directed="1"/>
      <edge id="349" label="349" source="77" target="73" cy:directed="1"/>
      <edge id="348" label="348" source="77" target="70" cy:directed="1"/>
      <edge id="347" label="347" source="77" target="215" cy:directed="1"/>
      <edge id="346" label="346" source="76" target="75" cy:directed="1"/>
      <edge id="345" label="345" source="76" target="73" cy:directed="1"/>
      <edge id="344" label="344" source="76" target="70" cy:directed="1"/>
      <edge id="343" label="343" source="76" target="215" cy:directed="1"/>
      <edge id="342" label="342" source="75" target="73" cy:directed="1"/>
      <edge id="341" label="341" source="75" target="70" cy:directed="1"/>
      <edge id="340" label="340" source="74" target="78" cy:directed="1"/>
      <edge id="339" label="339" source="74" target="77" cy:directed="1"/>
      <edge id="338" label="338" source="74" target="76" cy:directed="1"/>
      <edge id="337" label="337" source="74" target="75" cy:directed="1"/>
      <edge id="336" label="336" source="74" target="73" cy:directed="1"/>
      <edge id="335" label="335" source="74" target="71" cy:directed="1"/>
      <edge id="334" label="334" source="74" target="70" cy:directed="1"/>
      <edge id="333" label="333" source="74" target="215" cy:directed="1"/>
      <edge id="332" label="332" source="73" target="70" cy:directed="1"/>
      <edge id="331" label="331" source="72" target="149" cy:directed="1"/>
      <edge id="330" label="330" source="72" target="148" cy:directed="1"/>
      <edge id="329" label="329" source="72" target="147" cy:directed="1"/>
      <edge id="328" label="328" source="72" target="228" cy:directed="1"/>
      <edge id="327" label="327" source="72" target="78" cy:directed="1"/>
      <edge id="326" label="326" source="72" target="77" cy:directed="1"/>
      <edge id="325" label="325" source="72" target="76" cy:directed="1"/>
      <edge id="324" label="324" source="72" target="75" cy:directed="1"/>
      <edge id="323" label="323" source="72" target="74" cy:directed="1"/>
      <edge id="322" label="322" source="72" target="73" cy:directed="1"/>
      <edge id="321" label="321" source="72" target="71" cy:directed="1"/>
      <edge id="320" label="320" source="72" target="70" cy:directed="1"/>
      <edge id="319" label="319" source="72" target="215" cy:directed="1"/>
      <edge id="318" label="318" source="71" target="77" cy:directed="1"/>
      <edge id="317" label="317" source="71" target="76" cy:directed="1"/>
      <edge id="316" label="316" source="71" target="75" cy:directed="1"/>
      <edge id="315" label="315" source="71" target="73" cy:directed="1"/>
      <edge id="314" label="314" source="71" target="70" cy:directed="1"/>
      <edge id="313" label="313" source="71" target="215" cy:directed="1"/>
      <edge id="312" label="312" source="69" target="105" cy:directed="1"/>
      <edge id="311" label="311" source="69" target="131" cy:directed="1"/>
      <edge id="310" label="310" source="69" target="100" cy:directed="1"/>
      <edge id="309" label="309" source="69" target="97" cy:directed="1"/>
      <edge id="308" label="308" source="69" target="220" cy:directed="1"/>
      <edge id="307" label="307" source="69" target="68" cy:directed="1"/>
      <edge id="306" label="306" source="69" target="67" cy:directed="1"/>
      <edge id="305" label="305" source="69" target="66" cy:directed="1"/>
      <edge id="304" label="304" source="69" target="65" cy:directed="1"/>
      <edge id="303" label="303" source="69" target="63" cy:directed="1"/>
      <edge id="302" label="302" source="69" target="62" cy:directed="1"/>
      <edge id="301" label="301" source="69" target="210" cy:directed="1"/>
      <edge id="300" label="300" source="68" target="133" cy:directed="1"/>
      <edge id="299" label="299" source="68" target="131" cy:directed="1"/>
      <edge id="298" label="298" source="68" target="130" cy:directed="1"/>
      <edge id="297" label="297" source="68" target="67" cy:directed="1"/>
      <edge id="296" label="296" source="68" target="65" cy:directed="1"/>
      <edge id="295" label="295" source="68" target="63" cy:directed="1"/>
      <edge id="294" label="294" source="68" target="62" cy:directed="1"/>
      <edge id="293" label="293" source="68" target="210" cy:directed="1"/>
      <edge id="292" label="292" source="67" target="133" cy:directed="1"/>
      <edge id="291" label="291" source="67" target="98" cy:directed="1"/>
      <edge id="290" label="290" source="67" target="63" cy:directed="1"/>
      <edge id="289" label="289" source="67" target="62" cy:directed="1"/>
      <edge id="288" label="288" source="67" target="210" cy:directed="1"/>
      <edge id="287" label="287" source="66" target="131" cy:directed="1"/>
      <edge id="286" label="286" source="66" target="100" cy:directed="1"/>
      <edge id="285" label="285" source="66" target="97" cy:directed="1"/>
      <edge id="284" label="284" source="66" target="220" cy:directed="1"/>
      <edge id="283" label="283" source="66" target="68" cy:directed="1"/>
      <edge id="282" label="282" source="66" target="67" cy:directed="1"/>
      <edge id="281" label="281" source="66" target="65" cy:directed="1"/>
      <edge id="280" label="280" source="66" target="63" cy:directed="1"/>
      <edge id="279" label="279" source="66" target="62" cy:directed="1"/>
      <edge id="278" label="278" source="66" target="210" cy:directed="1"/>
      <edge id="277" label="277" source="65" target="131" cy:directed="1"/>
      <edge id="276" label="276" source="65" target="130" cy:directed="1"/>
      <edge id="275" label="275" source="65" target="97" cy:directed="1"/>
      <edge id="274" label="274" source="65" target="220" cy:directed="1"/>
      <edge id="273" label="273" source="65" target="67" cy:directed="1"/>
      <edge id="272" label="272" source="65" target="63" cy:directed="1"/>
      <edge id="271" label="271" source="65" target="62" cy:directed="1"/>
      <edge id="270" label="270" source="65" target="210" cy:directed="1"/>
      <edge id="269" label="269" source="64" target="105" cy:directed="1"/>
      <edge id="268" label="268" source="64" target="100" cy:directed="1"/>
      <edge id="267" label="267" source="64" target="97" cy:directed="1"/>
      <edge id="266" label="266" source="64" target="69" cy:directed="1"/>
      <edge id="265" label="265" source="64" target="68" cy:directed="1"/>
      <edge id="264" label="264" source="64" target="67" cy:directed="1"/>
      <edge id="263" label="263" source="64" target="66" cy:directed="1"/>
      <edge id="262" label="262" source="64" target="65" cy:directed="1"/>
      <edge id="261" label="261" source="64" target="63" cy:directed="1"/>
      <edge id="260" label="260" source="64" target="62" cy:directed="1"/>
      <edge id="259" label="259" source="64" target="61" cy:directed="1"/>
      <edge id="258" label="258" source="64" target="210" cy:directed="1"/>
      <edge id="257" label="257" source="63" target="131" cy:directed="1"/>
      <edge id="256" label="256" source="63" target="62" cy:directed="1"/>
      <edge id="255" label="255" source="63" target="210" cy:directed="1"/>
      <edge id="254" label="254" source="62" target="131" cy:directed="1"/>
      <edge id="253" label="253" source="62" target="210" cy:directed="1"/>
      <edge id="252" label="252" source="61" target="137" cy:directed="1"/>
      <edge id="251" label="251" source="61" target="135" cy:directed="1"/>
      <edge id="250" label="250" source="61" target="134" cy:directed="1"/>
      <edge id="249" label="249" source="61" target="133" cy:directed="1"/>
      <edge id="248" label="248" source="61" target="104" cy:directed="1"/>
      <edge id="247" label="247" source="61" target="103" cy:directed="1"/>
      <edge id="246" label="246" source="61" target="131" cy:directed="1"/>
      <edge id="245" label="245" source="61" target="102" cy:directed="1"/>
      <edge id="244" label="244" source="61" target="101" cy:directed="1"/>
      <edge id="243" label="243" source="61" target="100" cy:directed="1"/>
      <edge id="242" label="242" source="61" target="130" cy:directed="1"/>
      <edge id="241" label="241" source="61" target="99" cy:directed="1"/>
      <edge id="240" label="240" source="61" target="98" cy:directed="1"/>
      <edge id="239" label="239" source="61" target="97" cy:directed="1"/>
      <edge id="238" label="238" source="61" target="220" cy:directed="1"/>
      <edge id="237" label="237" source="61" target="69" cy:directed="1"/>
      <edge id="236" label="236" source="61" target="68" cy:directed="1"/>
      <edge id="235" label="235" source="61" target="67" cy:directed="1"/>
      <edge id="234" label="234" source="61" target="66" cy:directed="1"/>
      <edge id="233" label="233" source="61" target="65" cy:directed="1"/>
      <edge id="232" label="232" source="61" target="63" cy:directed="1"/>
      <edge id="231" label="231" source="61" target="62" cy:directed="1"/>
      <edge id="230" label="230" source="61" target="210" cy:directed="1"/>
    </graph>
  </att>
  <att>
    <graph id="1162" label="ColorByPValue" cy:registered="1">
      <node id="1340" label="169"/>
      <node id="1339" label="168"/>
      <node id="1338" label="167"/>
      <node id="1337" label="166"/>
      <node id="1336" label="165"/>
      <node id="1335" label="164"/>
      <node id="1334" label="163"/>
      <node id="1333" label="162"/>
      <node id="1332" label="161"/>
      <node id="1322" label="151"/>
      <node id="1321" label="150"/>
      <node id="1320" label="149"/>
      <node id="1319" label="148"/>
      <node id="1318" label="147"/>
      <node id="1317" label="146"/>
      <node id="1316" label="145"/>
      <node id="1315" label="144"/>
      <node id="1314" label="143"/>
      <node id="1313" label="142"/>
      <node id="1312" label="141"/>
      <node id="1311" label="140"/>
      <node id="1310" label="139"/>
      <node id="1309" label="138"/>
      <node id="1308" label="137"/>
      <node id="1307" label="136"/>
      <node id="1306" label="135"/>
      <node id="1305" label="134"/>
      <node id="1304" label="133"/>
      <node id="1303" label="132"/>
      <node id="1302" label="131"/>
      <node id="1301" label="130"/>
      <node id="1300" label="129"/>
      <node id="1299" label="128"/>
      <node id="1298" label="127"/>
      <node id="1297" label="126"/>
      <node id="1296" label="125"/>
      <node id="1295" label="124"/>
      <node id="1294" label="123"/>
      <node id="1293" label="122"/>
      <node id="1292" label="121"/>
      <node id="1291" label="120"/>
      <node id="1290" label="119"/>
      <node id="1289" label="118"/>
      <node id="1288" label="117"/>
      <node id="1287" label="116"/>
      <node id="1286" label="115"/>
      <node id="1285" label="114"/>
      <node id="1284" label="113"/>
      <node id="1283" label="112"/>
      <node id="1282" label="111"/>
      <node id="1281" label="110"/>
      <node id="1280" label="109"/>
      <node id="1279" label="108"/>
      <node id="1278" label="107"/>
      <node id="1277" label="106"/>
      <node id="1276" label="105"/>
      <node id="1275" label="104"/>
      <node id="1274" label="103"/>
      <node id="1273" label="102"/>
      <node id="1272" label="101"/>
      <node id="1271" label="100"/>
      <node id="1270" label="99"/>
      <node id="1269" label="98"/>
      <node id="1268" label="97"/>
      <node id="1267" label="96"/>
      <node id="1266" label="95"/>
      <node id="1265" label="94"/>
      <node id="1264" label="93"/>
      <node id="1262" label="91"/>
      <node id="1261" label="90"/>
      <node id="1260" label="89"/>
      <node id="1259" label="88"/>
      <node id="1258" label="87"/>
      <node id="1257" label="86"/>
      <node id="1256" label="85"/>
      <node id="1255" label="84"/>
      <node id="1247" label="76"/>
      <node id="1246" label="75"/>
      <node id="1245" label="74"/>
      <node id="1237" label="66"/>
      <node id="1236" label="65"/>
      <node id="1235" label="64"/>
      <node id="1234" label="63"/>
      <node id="1233" label="62"/>
      <node id="1232" label="61"/>
      <node id="1231" label="60"/>
      <node id="1230" label="59"/>
      <node id="1229" label="58"/>
      <node id="1228" label="57"/>
      <node id="1227" label="56"/>
      <node id="1226" label="55"/>
      <node id="1225" label="54"/>
      <node id="1224" label="53"/>
      <node id="1223" label="52"/>
      <node id="1222" label="51"/>
      <node id="1221" label="50"/>
      <node id="1220" label="49"/>
      <node id="1219" label="48"/>
      <node id="1218" label="47"/>
      <node id="1217" label="46"/>
      <node id="1216" label="45"/>
      <node id="1215" label="44"/>
      <node id="1214" label="43"/>
      <node id="1209" label="38"/>
      <node id="1208" label="37"/>
      <node id="1207" label="36"/>
      <node id="1206" label="35"/>
      <node id="1205" label="34"/>
      <node id="1204" label="33"/>
      <node id="1203" label="32"/>
      <node id="1202" label="31"/>
      <node id="1201" label="30"/>
      <node id="1191" label="20"/>
      <node id="1190" label="19"/>
      <node id="1189" label="18"/>
      <node id="1188" label="17"/>
      <node id="1187" label="16"/>
      <node id="1185" label="14"/>
      <node id="1184" label="13"/>
      <node id="1183" label="12"/>
      <node id="1182" label="11"/>
      <node id="1181" label="10"/>
      <node id="1179" label="8"/>
      <node id="1178" label="7"/>
      <node id="1176" label="5"/>
      <node id="1174" label="3"/>
      <edge id="2272" label="2272" source="1340" target="1191" cy:directed="1"/>
      <edge id="2271" label="2271" source="1340" target="1339" cy:directed="1"/>
      <edge id="2270" label="2270" source="1340" target="1338" cy:directed="1"/>
      <edge id="2269" label="2269" source="1340" target="1336" cy:directed="1"/>
      <edge id="2268" label="2268" source="1340" target="1335" cy:directed="1"/>
      <edge id="2267" label="2267" source="1340" target="1334" cy:directed="1"/>
      <edge id="2266" label="2266" source="1340" target="1333" cy:directed="1"/>
      <edge id="2265" label="2265" source="1340" target="1332" cy:directed="1"/>
      <edge id="2264" label="2264" source="1340" target="1181" cy:directed="1"/>
      <edge id="2263" label="2263" source="1340" target="1304" cy:directed="1"/>
      <edge id="2262" label="2262" source="1340" target="1303" cy:directed="1"/>
      <edge id="2261" label="2261" source="1340" target="1302" cy:directed="1"/>
      <edge id="2260" label="2260" source="1340" target="1271" cy:directed="1"/>
      <edge id="2259" label="2259" source="1340" target="1301" cy:directed="1"/>
      <edge id="2258" label="2258" source="1340" target="1300" cy:directed="1"/>
      <edge id="2257" label="2257" source="1340" target="1299" cy:directed="1"/>
      <edge id="2256" label="2256" source="1340" target="1270" cy:directed="1"/>
      <edge id="2255" label="2255" source="1340" target="1298" cy:directed="1"/>
      <edge id="2254" label="2254" source="1340" target="1297" cy:directed="1"/>
      <edge id="2253" label="2253" source="1340" target="1268" cy:directed="1"/>
      <edge id="2252" label="2252" source="1340" target="1267" cy:directed="1"/>
      <edge id="2251" label="2251" source="1340" target="1266" cy:directed="1"/>
      <edge id="2250" label="2250" source="1340" target="1264" cy:directed="1"/>
      <edge id="2249" label="2249" source="1339" target="1191" cy:directed="1"/>
      <edge id="2248" label="2248" source="1339" target="1270" cy:directed="1"/>
      <edge id="2247" label="2247" source="1338" target="1191" cy:directed="1"/>
      <edge id="2246" label="2246" source="1338" target="1339" cy:directed="1"/>
      <edge id="2245" label="2245" source="1338" target="1270" cy:directed="1"/>
      <edge id="2244" label="2244" source="1337" target="1191" cy:directed="1"/>
      <edge id="2243" label="2243" source="1337" target="1340" cy:directed="1"/>
      <edge id="2242" label="2242" source="1337" target="1339" cy:directed="1"/>
      <edge id="2241" label="2241" source="1337" target="1338" cy:directed="1"/>
      <edge id="2240" label="2240" source="1337" target="1336" cy:directed="1"/>
      <edge id="2239" label="2239" source="1337" target="1335" cy:directed="1"/>
      <edge id="2238" label="2238" source="1337" target="1334" cy:directed="1"/>
      <edge id="2237" label="2237" source="1337" target="1333" cy:directed="1"/>
      <edge id="2236" label="2236" source="1337" target="1332" cy:directed="1"/>
      <edge id="2235" label="2235" source="1337" target="1304" cy:directed="1"/>
      <edge id="2234" label="2234" source="1337" target="1301" cy:directed="1"/>
      <edge id="2233" label="2233" source="1337" target="1296" cy:directed="1"/>
      <edge id="2232" label="2232" source="1336" target="1191" cy:directed="1"/>
      <edge id="2231" label="2231" source="1336" target="1339" cy:directed="1"/>
      <edge id="2230" label="2230" source="1336" target="1338" cy:directed="1"/>
      <edge id="2229" label="2229" source="1336" target="1334" cy:directed="1"/>
      <edge id="2228" label="2228" source="1336" target="1181" cy:directed="1"/>
      <edge id="2227" label="2227" source="1336" target="1304" cy:directed="1"/>
      <edge id="2226" label="2226" source="1336" target="1271" cy:directed="1"/>
      <edge id="2225" label="2225" source="1336" target="1270" cy:directed="1"/>
      <edge id="2224" label="2224" source="1335" target="1191" cy:directed="1"/>
      <edge id="2223" label="2223" source="1335" target="1339" cy:directed="1"/>
      <edge id="2222" label="2222" source="1335" target="1338" cy:directed="1"/>
      <edge id="2221" label="2221" source="1335" target="1336" cy:directed="1"/>
      <edge id="2220" label="2220" source="1335" target="1334" cy:directed="1"/>
      <edge id="2219" label="2219" source="1335" target="1333" cy:directed="1"/>
      <edge id="2218" label="2218" source="1335" target="1181" cy:directed="1"/>
      <edge id="2217" label="2217" source="1335" target="1304" cy:directed="1"/>
      <edge id="2216" label="2216" source="1335" target="1301" cy:directed="1"/>
      <edge id="2215" label="2215" source="1335" target="1270" cy:directed="1"/>
      <edge id="2214" label="2214" source="1334" target="1191" cy:directed="1"/>
      <edge id="2213" label="2213" source="1334" target="1339" cy:directed="1"/>
      <edge id="2212" label="2212" source="1334" target="1338" cy:directed="1"/>
      <edge id="2211" label="2211" source="1334" target="1303" cy:directed="1"/>
      <edge id="2210" label="2210" source="1334" target="1268" cy:directed="1"/>
      <edge id="2209" label="2209" source="1333" target="1191" cy:directed="1"/>
      <edge id="2208" label="2208" source="1333" target="1339" cy:directed="1"/>
      <edge id="2207" label="2207" source="1333" target="1338" cy:directed="1"/>
      <edge id="2206" label="2206" source="1333" target="1336" cy:directed="1"/>
      <edge id="2205" label="2205" source="1333" target="1334" cy:directed="1"/>
      <edge id="2204" label="2204" source="1333" target="1271" cy:directed="1"/>
      <edge id="2203" label="2203" source="1333" target="1270" cy:directed="1"/>
      <edge id="2202" label="2202" source="1333" target="1268" cy:directed="1"/>
      <edge id="2201" label="2201" source="1332" target="1191" cy:directed="1"/>
      <edge id="2200" label="2200" source="1332" target="1339" cy:directed="1"/>
      <edge id="2199" label="2199" source="1332" target="1338" cy:directed="1"/>
      <edge id="2198" label="2198" source="1332" target="1336" cy:directed="1"/>
      <edge id="2197" label="2197" source="1332" target="1335" cy:directed="1"/>
      <edge id="2196" label="2196" source="1332" target="1334" cy:directed="1"/>
      <edge id="2195" label="2195" source="1332" target="1333" cy:directed="1"/>
      <edge id="2194" label="2194" source="1332" target="1181" cy:directed="1"/>
      <edge id="2193" label="2193" source="1332" target="1304" cy:directed="1"/>
      <edge id="2192" label="2192" source="1332" target="1301" cy:directed="1"/>
      <edge id="2191" label="2191" source="1332" target="1270" cy:directed="1"/>
      <edge id="2190" label="2190" source="1332" target="1296" cy:directed="1"/>
      <edge id="2143" label="2143" source="1322" target="1174" cy:directed="1"/>
      <edge id="2142" label="2142" source="1322" target="1321" cy:directed="1"/>
      <edge id="2141" label="2141" source="1322" target="1320" cy:directed="1"/>
      <edge id="2140" label="2140" source="1322" target="1319" cy:directed="1"/>
      <edge id="2139" label="2139" source="1322" target="1318" cy:directed="1"/>
      <edge id="2138" label="2138" source="1322" target="1317" cy:directed="1"/>
      <edge id="2137" label="2137" source="1322" target="1316" cy:directed="1"/>
      <edge id="2136" label="2136" source="1322" target="1315" cy:directed="1"/>
      <edge id="2135" label="2135" source="1322" target="1314" cy:directed="1"/>
      <edge id="2134" label="2134" source="1321" target="1320" cy:directed="1"/>
      <edge id="2133" label="2133" source="1321" target="1318" cy:directed="1"/>
      <edge id="2132" label="2132" source="1321" target="1189" cy:directed="1"/>
      <edge id="2131" label="2131" source="1321" target="1317" cy:directed="1"/>
      <edge id="2130" label="2130" source="1321" target="1316" cy:directed="1"/>
      <edge id="2129" label="2129" source="1321" target="1220" cy:directed="1"/>
      <edge id="2128" label="2128" source="1321" target="1219" cy:directed="1"/>
      <edge id="2127" label="2127" source="1321" target="1315" cy:directed="1"/>
      <edge id="2126" label="2126" source="1321" target="1314" cy:directed="1"/>
      <edge id="2125" label="2125" source="1321" target="1218" cy:directed="1"/>
      <edge id="2124" label="2124" source="1321" target="1217" cy:directed="1"/>
      <edge id="2123" label="2123" source="1321" target="1215" cy:directed="1"/>
      <edge id="2122" label="2122" source="1320" target="1221" cy:directed="1"/>
      <edge id="2121" label="2121" source="1320" target="1220" cy:directed="1"/>
      <edge id="2120" label="2120" source="1320" target="1219" cy:directed="1"/>
      <edge id="2119" label="2119" source="1320" target="1218" cy:directed="1"/>
      <edge id="2118" label="2118" source="1320" target="1217" cy:directed="1"/>
      <edge id="2117" label="2117" source="1320" target="1215" cy:directed="1"/>
      <edge id="2116" label="2116" source="1319" target="1321" cy:directed="1"/>
      <edge id="2115" label="2115" source="1319" target="1320" cy:directed="1"/>
      <edge id="2114" label="2114" source="1319" target="1318" cy:directed="1"/>
      <edge id="2113" label="2113" source="1319" target="1317" cy:directed="1"/>
      <edge id="2112" label="2112" source="1319" target="1221" cy:directed="1"/>
      <edge id="2111" label="2111" source="1319" target="1316" cy:directed="1"/>
      <edge id="2110" label="2110" source="1319" target="1220" cy:directed="1"/>
      <edge id="2109" label="2109" source="1319" target="1315" cy:directed="1"/>
      <edge id="2108" label="2108" source="1319" target="1314" cy:directed="1"/>
      <edge id="2107" label="2107" source="1319" target="1218" cy:directed="1"/>
      <edge id="2106" label="2106" source="1319" target="1217" cy:directed="1"/>
      <edge id="2105" label="2105" source="1318" target="1320" cy:directed="1"/>
      <edge id="2104" label="2104" source="1318" target="1317" cy:directed="1"/>
      <edge id="2103" label="2103" source="1318" target="1316" cy:directed="1"/>
      <edge id="2102" label="2102" source="1318" target="1315" cy:directed="1"/>
      <edge id="2101" label="2101" source="1318" target="1314" cy:directed="1"/>
      <edge id="2100" label="2100" source="1317" target="1320" cy:directed="1"/>
      <edge id="2099" label="2099" source="1317" target="1315" cy:directed="1"/>
      <edge id="2098" label="2098" source="1317" target="1314" cy:directed="1"/>
      <edge id="2097" label="2097" source="1316" target="1320" cy:directed="1"/>
      <edge id="2096" label="2096" source="1316" target="1317" cy:directed="1"/>
      <edge id="2095" label="2095" source="1316" target="1315" cy:directed="1"/>
      <edge id="2094" label="2094" source="1316" target="1314" cy:directed="1"/>
      <edge id="2093" label="2093" source="1316" target="1237" cy:directed="1"/>
      <edge id="2092" label="2092" source="1316" target="1214" cy:directed="1"/>
      <edge id="2091" label="2091" source="1315" target="1320" cy:directed="1"/>
      <edge id="2090" label="2090" source="1314" target="1320" cy:directed="1"/>
      <edge id="2089" label="2089" source="1314" target="1315" cy:directed="1"/>
      <edge id="2088" label="2088" source="1313" target="1176" cy:directed="1"/>
      <edge id="2087" label="2087" source="1313" target="1184" cy:directed="1"/>
      <edge id="2086" label="2086" source="1313" target="1179" cy:directed="1"/>
      <edge id="2085" label="2085" source="1313" target="1312" cy:directed="1"/>
      <edge id="2084" label="2084" source="1313" target="1311" cy:directed="1"/>
      <edge id="2083" label="2083" source="1313" target="1182" cy:directed="1"/>
      <edge id="2082" label="2082" source="1313" target="1310" cy:directed="1"/>
      <edge id="2081" label="2081" source="1313" target="1309" cy:directed="1"/>
      <edge id="2080" label="2080" source="1313" target="1308" cy:directed="1"/>
      <edge id="2079" label="2079" source="1313" target="1307" cy:directed="1"/>
      <edge id="2078" label="2078" source="1313" target="1306" cy:directed="1"/>
      <edge id="2077" label="2077" source="1313" target="1285" cy:directed="1"/>
      <edge id="2076" label="2076" source="1313" target="1305" cy:directed="1"/>
      <edge id="2075" label="2075" source="1313" target="1280" cy:directed="1"/>
      <edge id="2074" label="2074" source="1313" target="1284" cy:directed="1"/>
      <edge id="2073" label="2073" source="1313" target="1278" cy:directed="1"/>
      <edge id="2072" label="2072" source="1313" target="1277" cy:directed="1"/>
      <edge id="2071" label="2071" source="1313" target="1276" cy:directed="1"/>
      <edge id="2070" label="2070" source="1313" target="1281" cy:directed="1"/>
      <edge id="2069" label="2069" source="1313" target="1274" cy:directed="1"/>
      <edge id="2068" label="2068" source="1313" target="1273" cy:directed="1"/>
      <edge id="2067" label="2067" source="1312" target="1309" cy:directed="1"/>
      <edge id="2066" label="2066" source="1312" target="1308" cy:directed="1"/>
      <edge id="2065" label="2065" source="1312" target="1280" cy:directed="1"/>
      <edge id="2064" label="2064" source="1312" target="1277" cy:directed="1"/>
      <edge id="2063" label="2063" source="1311" target="1176" cy:directed="1"/>
      <edge id="2062" label="2062" source="1311" target="1312" cy:directed="1"/>
      <edge id="2061" label="2061" source="1311" target="1310" cy:directed="1"/>
      <edge id="2060" label="2060" source="1311" target="1309" cy:directed="1"/>
      <edge id="2059" label="2059" source="1311" target="1308" cy:directed="1"/>
      <edge id="2058" label="2058" source="1311" target="1285" cy:directed="1"/>
      <edge id="2057" label="2057" source="1311" target="1305" cy:directed="1"/>
      <edge id="2056" label="2056" source="1311" target="1280" cy:directed="1"/>
      <edge id="2055" label="2055" source="1311" target="1278" cy:directed="1"/>
      <edge id="2054" label="2054" source="1311" target="1277" cy:directed="1"/>
      <edge id="2053" label="2053" source="1310" target="1312" cy:directed="1"/>
      <edge id="2052" label="2052" source="1310" target="1309" cy:directed="1"/>
      <edge id="2051" label="2051" source="1310" target="1308" cy:directed="1"/>
      <edge id="2050" label="2050" source="1310" target="1280" cy:directed="1"/>
      <edge id="2049" label="2049" source="1310" target="1277" cy:directed="1"/>
      <edge id="2048" label="2048" source="1308" target="1309" cy:directed="1"/>
      <edge id="2047" label="2047" source="1307" target="1176" cy:directed="1"/>
      <edge id="2046" label="2046" source="1307" target="1179" cy:directed="1"/>
      <edge id="2045" label="2045" source="1307" target="1312" cy:directed="1"/>
      <edge id="2044" label="2044" source="1307" target="1311" cy:directed="1"/>
      <edge id="2043" label="2043" source="1307" target="1310" cy:directed="1"/>
      <edge id="2042" label="2042" source="1307" target="1309" cy:directed="1"/>
      <edge id="2041" label="2041" source="1307" target="1308" cy:directed="1"/>
      <edge id="2040" label="2040" source="1307" target="1285" cy:directed="1"/>
      <edge id="2039" label="2039" source="1307" target="1305" cy:directed="1"/>
      <edge id="2038" label="2038" source="1307" target="1280" cy:directed="1"/>
      <edge id="2037" label="2037" source="1307" target="1208" cy:directed="1"/>
      <edge id="2036" label="2036" source="1307" target="1278" cy:directed="1"/>
      <edge id="2035" label="2035" source="1307" target="1277" cy:directed="1"/>
      <edge id="2034" label="2034" source="1307" target="1276" cy:directed="1"/>
      <edge id="2033" label="2033" source="1307" target="1273" cy:directed="1"/>
      <edge id="2032" label="2032" source="1307" target="1202" cy:directed="1"/>
      <edge id="2031" label="2031" source="1306" target="1176" cy:directed="1"/>
      <edge id="2030" label="2030" source="1306" target="1312" cy:directed="1"/>
      <edge id="2029" label="2029" source="1306" target="1311" cy:directed="1"/>
      <edge id="2028" label="2028" source="1306" target="1310" cy:directed="1"/>
      <edge id="2027" label="2027" source="1306" target="1309" cy:directed="1"/>
      <edge id="2026" label="2026" source="1306" target="1308" cy:directed="1"/>
      <edge id="2025" label="2025" source="1306" target="1307" cy:directed="1"/>
      <edge id="2024" label="2024" source="1306" target="1285" cy:directed="1"/>
      <edge id="2023" label="2023" source="1306" target="1305" cy:directed="1"/>
      <edge id="2022" label="2022" source="1306" target="1280" cy:directed="1"/>
      <edge id="2021" label="2021" source="1306" target="1278" cy:directed="1"/>
      <edge id="2020" label="2020" source="1306" target="1277" cy:directed="1"/>
      <edge id="2019" label="2019" source="1306" target="1273" cy:directed="1"/>
      <edge id="2018" label="2018" source="1305" target="1312" cy:directed="1"/>
      <edge id="2017" label="2017" source="1305" target="1310" cy:directed="1"/>
      <edge id="2016" label="2016" source="1305" target="1309" cy:directed="1"/>
      <edge id="2015" label="2015" source="1305" target="1308" cy:directed="1"/>
      <edge id="2014" label="2014" source="1305" target="1281" cy:directed="1"/>
      <edge id="2013" label="2013" source="1304" target="1191" cy:directed="1"/>
      <edge id="2012" label="2012" source="1304" target="1339" cy:directed="1"/>
      <edge id="2011" label="2011" source="1304" target="1338" cy:directed="1"/>
      <edge id="2010" label="2010" source="1304" target="1334" cy:directed="1"/>
      <edge id="2009" label="2009" source="1304" target="1190" cy:directed="1"/>
      <edge id="2008" label="2008" source="1304" target="1303" cy:directed="1"/>
      <edge id="2007" label="2007" source="1304" target="1187" cy:directed="1"/>
      <edge id="2006" label="2006" source="1304" target="1271" cy:directed="1"/>
      <edge id="2005" label="2005" source="1304" target="1300" cy:directed="1"/>
      <edge id="2004" label="2004" source="1304" target="1270" cy:directed="1"/>
      <edge id="2003" label="2003" source="1304" target="1268" cy:directed="1"/>
      <edge id="2002" label="2002" source="1303" target="1339" cy:directed="1"/>
      <edge id="2001" label="2001" source="1303" target="1190" cy:directed="1"/>
      <edge id="2000" label="2000" source="1302" target="1339" cy:directed="1"/>
      <edge id="1999" label="1999" source="1302" target="1334" cy:directed="1"/>
      <edge id="1998" label="1998" source="1302" target="1190" cy:directed="1"/>
      <edge id="1997" label="1997" source="1302" target="1304" cy:directed="1"/>
      <edge id="1996" label="1996" source="1302" target="1303" cy:directed="1"/>
      <edge id="1995" label="1995" source="1302" target="1300" cy:directed="1"/>
      <edge id="1994" label="1994" source="1301" target="1191" cy:directed="1"/>
      <edge id="1993" label="1993" source="1301" target="1339" cy:directed="1"/>
      <edge id="1992" label="1992" source="1301" target="1338" cy:directed="1"/>
      <edge id="1991" label="1991" source="1301" target="1336" cy:directed="1"/>
      <edge id="1990" label="1990" source="1301" target="1334" cy:directed="1"/>
      <edge id="1989" label="1989" source="1301" target="1181" cy:directed="1"/>
      <edge id="1988" label="1988" source="1301" target="1304" cy:directed="1"/>
      <edge id="1987" label="1987" source="1301" target="1303" cy:directed="1"/>
      <edge id="1986" label="1986" source="1301" target="1302" cy:directed="1"/>
      <edge id="1985" label="1985" source="1301" target="1271" cy:directed="1"/>
      <edge id="1984" label="1984" source="1301" target="1300" cy:directed="1"/>
      <edge id="1983" label="1983" source="1301" target="1270" cy:directed="1"/>
      <edge id="1982" label="1982" source="1301" target="1298" cy:directed="1"/>
      <edge id="1981" label="1981" source="1301" target="1297" cy:directed="1"/>
      <edge id="1980" label="1980" source="1301" target="1268" cy:directed="1"/>
      <edge id="1979" label="1979" source="1301" target="1266" cy:directed="1"/>
      <edge id="1978" label="1978" source="1300" target="1339" cy:directed="1"/>
      <edge id="1977" label="1977" source="1300" target="1334" cy:directed="1"/>
      <edge id="1976" label="1976" source="1300" target="1190" cy:directed="1"/>
      <edge id="1975" label="1975" source="1300" target="1303" cy:directed="1"/>
      <edge id="1974" label="1974" source="1299" target="1339" cy:directed="1"/>
      <edge id="1973" label="1973" source="1299" target="1334" cy:directed="1"/>
      <edge id="1972" label="1972" source="1299" target="1190" cy:directed="1"/>
      <edge id="1971" label="1971" source="1299" target="1304" cy:directed="1"/>
      <edge id="1970" label="1970" source="1299" target="1303" cy:directed="1"/>
      <edge id="1969" label="1969" source="1299" target="1302" cy:directed="1"/>
      <edge id="1968" label="1968" source="1299" target="1301" cy:directed="1"/>
      <edge id="1967" label="1967" source="1299" target="1300" cy:directed="1"/>
      <edge id="1966" label="1966" source="1299" target="1298" cy:directed="1"/>
      <edge id="1965" label="1965" source="1299" target="1297" cy:directed="1"/>
      <edge id="1964" label="1964" source="1299" target="1296" cy:directed="1"/>
      <edge id="1963" label="1963" source="1298" target="1339" cy:directed="1"/>
      <edge id="1962" label="1962" source="1298" target="1334" cy:directed="1"/>
      <edge id="1961" label="1961" source="1298" target="1190" cy:directed="1"/>
      <edge id="1960" label="1960" source="1298" target="1304" cy:directed="1"/>
      <edge id="1959" label="1959" source="1298" target="1303" cy:directed="1"/>
      <edge id="1958" label="1958" source="1298" target="1302" cy:directed="1"/>
      <edge id="1957" label="1957" source="1298" target="1300" cy:directed="1"/>
      <edge id="1956" label="1956" source="1298" target="1297" cy:directed="1"/>
      <edge id="1955" label="1955" source="1297" target="1339" cy:directed="1"/>
      <edge id="1954" label="1954" source="1297" target="1334" cy:directed="1"/>
      <edge id="1953" label="1953" source="1297" target="1190" cy:directed="1"/>
      <edge id="1952" label="1952" source="1297" target="1304" cy:directed="1"/>
      <edge id="1951" label="1951" source="1297" target="1303" cy:directed="1"/>
      <edge id="1950" label="1950" source="1297" target="1302" cy:directed="1"/>
      <edge id="1949" label="1949" source="1297" target="1300" cy:directed="1"/>
      <edge id="1948" label="1948" source="1296" target="1336" cy:directed="1"/>
      <edge id="1947" label="1947" source="1296" target="1335" cy:directed="1"/>
      <edge id="1946" label="1946" source="1296" target="1334" cy:directed="1"/>
      <edge id="1945" label="1945" source="1296" target="1190" cy:directed="1"/>
      <edge id="1944" label="1944" source="1296" target="1304" cy:directed="1"/>
      <edge id="1943" label="1943" source="1296" target="1303" cy:directed="1"/>
      <edge id="1942" label="1942" source="1296" target="1302" cy:directed="1"/>
      <edge id="1941" label="1941" source="1296" target="1300" cy:directed="1"/>
      <edge id="1940" label="1940" source="1296" target="1298" cy:directed="1"/>
      <edge id="1939" label="1939" source="1296" target="1297" cy:directed="1"/>
      <edge id="1938" label="1938" source="1295" target="1294" cy:directed="1"/>
      <edge id="1937" label="1937" source="1295" target="1293" cy:directed="1"/>
      <edge id="1936" label="1936" source="1295" target="1292" cy:directed="1"/>
      <edge id="1935" label="1935" source="1295" target="1291" cy:directed="1"/>
      <edge id="1934" label="1934" source="1295" target="1290" cy:directed="1"/>
      <edge id="1933" label="1933" source="1295" target="1289" cy:directed="1"/>
      <edge id="1932" label="1932" source="1295" target="1288" cy:directed="1"/>
      <edge id="1931" label="1931" source="1295" target="1287" cy:directed="1"/>
      <edge id="1930" label="1930" source="1294" target="1293" cy:directed="1"/>
      <edge id="1929" label="1929" source="1294" target="1292" cy:directed="1"/>
      <edge id="1928" label="1928" source="1294" target="1291" cy:directed="1"/>
      <edge id="1927" label="1927" source="1294" target="1290" cy:directed="1"/>
      <edge id="1926" label="1926" source="1294" target="1289" cy:directed="1"/>
      <edge id="1925" label="1925" source="1294" target="1288" cy:directed="1"/>
      <edge id="1924" label="1924" source="1294" target="1287" cy:directed="1"/>
      <edge id="1923" label="1923" source="1293" target="1292" cy:directed="1"/>
      <edge id="1922" label="1922" source="1293" target="1291" cy:directed="1"/>
      <edge id="1921" label="1921" source="1293" target="1290" cy:directed="1"/>
      <edge id="1920" label="1920" source="1293" target="1289" cy:directed="1"/>
      <edge id="1919" label="1919" source="1293" target="1288" cy:directed="1"/>
      <edge id="1918" label="1918" source="1293" target="1287" cy:directed="1"/>
      <edge id="1917" label="1917" source="1292" target="1291" cy:directed="1"/>
      <edge id="1916" label="1916" source="1292" target="1290" cy:directed="1"/>
      <edge id="1915" label="1915" source="1292" target="1289" cy:directed="1"/>
      <edge id="1914" label="1914" source="1292" target="1287" cy:directed="1"/>
      <edge id="1913" label="1913" source="1291" target="1290" cy:directed="1"/>
      <edge id="1912" label="1912" source="1291" target="1289" cy:directed="1"/>
      <edge id="1911" label="1911" source="1289" target="1290" cy:directed="1"/>
      <edge id="1910" label="1910" source="1288" target="1292" cy:directed="1"/>
      <edge id="1909" label="1909" source="1288" target="1291" cy:directed="1"/>
      <edge id="1908" label="1908" source="1288" target="1290" cy:directed="1"/>
      <edge id="1907" label="1907" source="1288" target="1289" cy:directed="1"/>
      <edge id="1906" label="1906" source="1288" target="1287" cy:directed="1"/>
      <edge id="1905" label="1905" source="1287" target="1291" cy:directed="1"/>
      <edge id="1904" label="1904" source="1287" target="1290" cy:directed="1"/>
      <edge id="1903" label="1903" source="1287" target="1289" cy:directed="1"/>
      <edge id="1902" label="1902" source="1286" target="1176" cy:directed="1"/>
      <edge id="1901" label="1901" source="1286" target="1184" cy:directed="1"/>
      <edge id="1900" label="1900" source="1286" target="1313" cy:directed="1"/>
      <edge id="1899" label="1899" source="1286" target="1312" cy:directed="1"/>
      <edge id="1898" label="1898" source="1286" target="1311" cy:directed="1"/>
      <edge id="1897" label="1897" source="1286" target="1310" cy:directed="1"/>
      <edge id="1896" label="1896" source="1286" target="1309" cy:directed="1"/>
      <edge id="1895" label="1895" source="1286" target="1308" cy:directed="1"/>
      <edge id="1894" label="1894" source="1286" target="1307" cy:directed="1"/>
      <edge id="1893" label="1893" source="1286" target="1306" cy:directed="1"/>
      <edge id="1892" label="1892" source="1286" target="1285" cy:directed="1"/>
      <edge id="1891" label="1891" source="1286" target="1284" cy:directed="1"/>
      <edge id="1890" label="1890" source="1286" target="1283" cy:directed="1"/>
      <edge id="1889" label="1889" source="1286" target="1282" cy:directed="1"/>
      <edge id="1888" label="1888" source="1286" target="1281" cy:directed="1"/>
      <edge id="1887" label="1887" source="1285" target="1176" cy:directed="1"/>
      <edge id="1886" label="1886" source="1285" target="1312" cy:directed="1"/>
      <edge id="1885" label="1885" source="1285" target="1310" cy:directed="1"/>
      <edge id="1884" label="1884" source="1285" target="1309" cy:directed="1"/>
      <edge id="1883" label="1883" source="1285" target="1308" cy:directed="1"/>
      <edge id="1882" label="1882" source="1285" target="1282" cy:directed="1"/>
      <edge id="1881" label="1881" source="1285" target="1281" cy:directed="1"/>
      <edge id="1880" label="1880" source="1284" target="1285" cy:directed="1"/>
      <edge id="1879" label="1879" source="1284" target="1305" cy:directed="1"/>
      <edge id="1878" label="1878" source="1284" target="1281" cy:directed="1"/>
      <edge id="1877" label="1877" source="1283" target="1285" cy:directed="1"/>
      <edge id="1876" label="1876" source="1283" target="1282" cy:directed="1"/>
      <edge id="1875" label="1875" source="1282" target="1277" cy:directed="1"/>
      <edge id="1874" label="1874" source="1280" target="1309" cy:directed="1"/>
      <edge id="1873" label="1873" source="1280" target="1308" cy:directed="1"/>
      <edge id="1872" label="1872" source="1280" target="1279" cy:directed="1"/>
      <edge id="1871" label="1871" source="1280" target="1257" cy:directed="1"/>
      <edge id="1870" label="1870" source="1280" target="1255" cy:directed="1"/>
      <edge id="1869" label="1869" source="1278" target="1179" cy:directed="1"/>
      <edge id="1868" label="1868" source="1278" target="1312" cy:directed="1"/>
      <edge id="1867" label="1867" source="1278" target="1310" cy:directed="1"/>
      <edge id="1866" label="1866" source="1278" target="1309" cy:directed="1"/>
      <edge id="1865" label="1865" source="1278" target="1308" cy:directed="1"/>
      <edge id="1864" label="1864" source="1278" target="1280" cy:directed="1"/>
      <edge id="1863" label="1863" source="1278" target="1279" cy:directed="1"/>
      <edge id="1862" label="1862" source="1278" target="1277" cy:directed="1"/>
      <edge id="1861" label="1861" source="1278" target="1257" cy:directed="1"/>
      <edge id="1860" label="1860" source="1278" target="1255" cy:directed="1"/>
      <edge id="1859" label="1859" source="1277" target="1179" cy:directed="1"/>
      <edge id="1858" label="1858" source="1277" target="1309" cy:directed="1"/>
      <edge id="1857" label="1857" source="1277" target="1308" cy:directed="1"/>
      <edge id="1856" label="1856" source="1277" target="1280" cy:directed="1"/>
      <edge id="1855" label="1855" source="1277" target="1279" cy:directed="1"/>
      <edge id="1854" label="1854" source="1277" target="1257" cy:directed="1"/>
      <edge id="1853" label="1853" source="1277" target="1255" cy:directed="1"/>
      <edge id="1852" label="1852" source="1276" target="1176" cy:directed="1"/>
      <edge id="1851" label="1851" source="1276" target="1179" cy:directed="1"/>
      <edge id="1850" label="1850" source="1276" target="1308" cy:directed="1"/>
      <edge id="1849" label="1849" source="1276" target="1280" cy:directed="1"/>
      <edge id="1848" label="1848" source="1276" target="1278" cy:directed="1"/>
      <edge id="1847" label="1847" source="1276" target="1277" cy:directed="1"/>
      <edge id="1846" label="1846" source="1275" target="1176" cy:directed="1"/>
      <edge id="1845" label="1845" source="1275" target="1280" cy:directed="1"/>
      <edge id="1844" label="1844" source="1275" target="1279" cy:directed="1"/>
      <edge id="1843" label="1843" source="1275" target="1278" cy:directed="1"/>
      <edge id="1842" label="1842" source="1275" target="1277" cy:directed="1"/>
      <edge id="1841" label="1841" source="1275" target="1273" cy:directed="1"/>
      <edge id="1840" label="1840" source="1275" target="1272" cy:directed="1"/>
      <edge id="1839" label="1839" source="1274" target="1176" cy:directed="1"/>
      <edge id="1838" label="1838" source="1274" target="1179" cy:directed="1"/>
      <edge id="1837" label="1837" source="1274" target="1312" cy:directed="1"/>
      <edge id="1836" label="1836" source="1274" target="1311" cy:directed="1"/>
      <edge id="1835" label="1835" source="1274" target="1310" cy:directed="1"/>
      <edge id="1834" label="1834" source="1274" target="1309" cy:directed="1"/>
      <edge id="1833" label="1833" source="1274" target="1308" cy:directed="1"/>
      <edge id="1832" label="1832" source="1274" target="1307" cy:directed="1"/>
      <edge id="1831" label="1831" source="1274" target="1306" cy:directed="1"/>
      <edge id="1830" label="1830" source="1274" target="1262" cy:directed="1"/>
      <edge id="1829" label="1829" source="1274" target="1261" cy:directed="1"/>
      <edge id="1828" label="1828" source="1274" target="1280" cy:directed="1"/>
      <edge id="1827" label="1827" source="1274" target="1278" cy:directed="1"/>
      <edge id="1826" label="1826" source="1274" target="1283" cy:directed="1"/>
      <edge id="1825" label="1825" source="1274" target="1260" cy:directed="1"/>
      <edge id="1824" label="1824" source="1274" target="1259" cy:directed="1"/>
      <edge id="1823" label="1823" source="1274" target="1277" cy:directed="1"/>
      <edge id="1822" label="1822" source="1274" target="1276" cy:directed="1"/>
      <edge id="1821" label="1821" source="1274" target="1273" cy:directed="1"/>
      <edge id="1820" label="1820" source="1274" target="1256" cy:directed="1"/>
      <edge id="1819" label="1819" source="1273" target="1176" cy:directed="1"/>
      <edge id="1818" label="1818" source="1273" target="1179" cy:directed="1"/>
      <edge id="1817" label="1817" source="1273" target="1312" cy:directed="1"/>
      <edge id="1816" label="1816" source="1273" target="1311" cy:directed="1"/>
      <edge id="1815" label="1815" source="1273" target="1310" cy:directed="1"/>
      <edge id="1814" label="1814" source="1273" target="1309" cy:directed="1"/>
      <edge id="1813" label="1813" source="1273" target="1308" cy:directed="1"/>
      <edge id="1812" label="1812" source="1273" target="1261" cy:directed="1"/>
      <edge id="1811" label="1811" source="1273" target="1280" cy:directed="1"/>
      <edge id="1810" label="1810" source="1273" target="1278" cy:directed="1"/>
      <edge id="1809" label="1809" source="1273" target="1260" cy:directed="1"/>
      <edge id="1808" label="1808" source="1273" target="1277" cy:directed="1"/>
      <edge id="1807" label="1807" source="1273" target="1276" cy:directed="1"/>
      <edge id="1806" label="1806" source="1273" target="1256" cy:directed="1"/>
      <edge id="1805" label="1805" source="1272" target="1176" cy:directed="1"/>
      <edge id="1804" label="1804" source="1272" target="1313" cy:directed="1"/>
      <edge id="1803" label="1803" source="1272" target="1179" cy:directed="1"/>
      <edge id="1802" label="1802" source="1272" target="1312" cy:directed="1"/>
      <edge id="1801" label="1801" source="1272" target="1311" cy:directed="1"/>
      <edge id="1800" label="1800" source="1272" target="1310" cy:directed="1"/>
      <edge id="1799" label="1799" source="1272" target="1309" cy:directed="1"/>
      <edge id="1798" label="1798" source="1272" target="1308" cy:directed="1"/>
      <edge id="1797" label="1797" source="1272" target="1307" cy:directed="1"/>
      <edge id="1796" label="1796" source="1272" target="1306" cy:directed="1"/>
      <edge id="1795" label="1795" source="1272" target="1280" cy:directed="1"/>
      <edge id="1794" label="1794" source="1272" target="1279" cy:directed="1"/>
      <edge id="1793" label="1793" source="1272" target="1278" cy:directed="1"/>
      <edge id="1792" label="1792" source="1272" target="1277" cy:directed="1"/>
      <edge id="1791" label="1791" source="1272" target="1257" cy:directed="1"/>
      <edge id="1790" label="1790" source="1272" target="1282" cy:directed="1"/>
      <edge id="1789" label="1789" source="1272" target="1276" cy:directed="1"/>
      <edge id="1788" label="1788" source="1272" target="1274" cy:directed="1"/>
      <edge id="1787" label="1787" source="1272" target="1273" cy:directed="1"/>
      <edge id="1786" label="1786" source="1272" target="1255" cy:directed="1"/>
      <edge id="1785" label="1785" source="1271" target="1191" cy:directed="1"/>
      <edge id="1784" label="1784" source="1271" target="1339" cy:directed="1"/>
      <edge id="1783" label="1783" source="1271" target="1338" cy:directed="1"/>
      <edge id="1782" label="1782" source="1271" target="1270" cy:directed="1"/>
      <edge id="1781" label="1781" source="1270" target="1191" cy:directed="1"/>
      <edge id="1780" label="1780" source="1269" target="1187" cy:directed="1"/>
      <edge id="1779" label="1779" source="1269" target="1268" cy:directed="1"/>
      <edge id="1778" label="1778" source="1268" target="1339" cy:directed="1"/>
      <edge id="1777" label="1777" source="1268" target="1271" cy:directed="1"/>
      <edge id="1776" label="1776" source="1268" target="1270" cy:directed="1"/>
      <edge id="1775" label="1775" source="1268" target="1265" cy:directed="1"/>
      <edge id="1774" label="1774" source="1267" target="1339" cy:directed="1"/>
      <edge id="1773" label="1773" source="1267" target="1333" cy:directed="1"/>
      <edge id="1772" label="1772" source="1267" target="1304" cy:directed="1"/>
      <edge id="1771" label="1771" source="1267" target="1187" cy:directed="1"/>
      <edge id="1770" label="1770" source="1267" target="1271" cy:directed="1"/>
      <edge id="1769" label="1769" source="1267" target="1301" cy:directed="1"/>
      <edge id="1768" label="1768" source="1267" target="1270" cy:directed="1"/>
      <edge id="1767" label="1767" source="1267" target="1269" cy:directed="1"/>
      <edge id="1766" label="1766" source="1267" target="1268" cy:directed="1"/>
      <edge id="1765" label="1765" source="1267" target="1266" cy:directed="1"/>
      <edge id="1764" label="1764" source="1267" target="1265" cy:directed="1"/>
      <edge id="1763" label="1763" source="1267" target="1264" cy:directed="1"/>
      <edge id="1762" label="1762" source="1266" target="1339" cy:directed="1"/>
      <edge id="1761" label="1761" source="1266" target="1333" cy:directed="1"/>
      <edge id="1760" label="1760" source="1266" target="1304" cy:directed="1"/>
      <edge id="1759" label="1759" source="1266" target="1187" cy:directed="1"/>
      <edge id="1758" label="1758" source="1266" target="1271" cy:directed="1"/>
      <edge id="1757" label="1757" source="1266" target="1270" cy:directed="1"/>
      <edge id="1756" label="1756" source="1266" target="1269" cy:directed="1"/>
      <edge id="1755" label="1755" source="1266" target="1268" cy:directed="1"/>
      <edge id="1754" label="1754" source="1266" target="1265" cy:directed="1"/>
      <edge id="1753" label="1753" source="1265" target="1270" cy:directed="1"/>
      <edge id="1752" label="1752" source="1264" target="1191" cy:directed="1"/>
      <edge id="1751" label="1751" source="1264" target="1339" cy:directed="1"/>
      <edge id="1750" label="1750" source="1264" target="1338" cy:directed="1"/>
      <edge id="1749" label="1749" source="1264" target="1334" cy:directed="1"/>
      <edge id="1748" label="1748" source="1264" target="1304" cy:directed="1"/>
      <edge id="1747" label="1747" source="1264" target="1187" cy:directed="1"/>
      <edge id="1746" label="1746" source="1264" target="1271" cy:directed="1"/>
      <edge id="1745" label="1745" source="1264" target="1301" cy:directed="1"/>
      <edge id="1744" label="1744" source="1264" target="1270" cy:directed="1"/>
      <edge id="1743" label="1743" source="1264" target="1268" cy:directed="1"/>
      <edge id="1742" label="1742" source="1264" target="1266" cy:directed="1"/>
      <edge id="1741" label="1741" source="1264" target="1265" cy:directed="1"/>
      <edge id="1740" label="1740" source="1262" target="1261" cy:directed="1"/>
      <edge id="1739" label="1739" source="1262" target="1260" cy:directed="1"/>
      <edge id="1738" label="1738" source="1262" target="1257" cy:directed="1"/>
      <edge id="1737" label="1737" source="1262" target="1256" cy:directed="1"/>
      <edge id="1736" label="1736" source="1260" target="1261" cy:directed="1"/>
      <edge id="1735" label="1735" source="1260" target="1256" cy:directed="1"/>
      <edge id="1734" label="1734" source="1259" target="1182" cy:directed="1"/>
      <edge id="1733" label="1733" source="1259" target="1262" cy:directed="1"/>
      <edge id="1732" label="1732" source="1259" target="1261" cy:directed="1"/>
      <edge id="1731" label="1731" source="1259" target="1260" cy:directed="1"/>
      <edge id="1730" label="1730" source="1259" target="1257" cy:directed="1"/>
      <edge id="1729" label="1729" source="1259" target="1273" cy:directed="1"/>
      <edge id="1728" label="1728" source="1259" target="1256" cy:directed="1"/>
      <edge id="1727" label="1727" source="1258" target="1182" cy:directed="1"/>
      <edge id="1726" label="1726" source="1258" target="1183" cy:directed="1"/>
      <edge id="1725" label="1725" source="1258" target="1262" cy:directed="1"/>
      <edge id="1724" label="1724" source="1258" target="1228" cy:directed="1"/>
      <edge id="1723" label="1723" source="1258" target="1261" cy:directed="1"/>
      <edge id="1722" label="1722" source="1258" target="1280" cy:directed="1"/>
      <edge id="1721" label="1721" source="1258" target="1279" cy:directed="1"/>
      <edge id="1720" label="1720" source="1258" target="1278" cy:directed="1"/>
      <edge id="1719" label="1719" source="1258" target="1260" cy:directed="1"/>
      <edge id="1718" label="1718" source="1258" target="1259" cy:directed="1"/>
      <edge id="1717" label="1717" source="1258" target="1277" cy:directed="1"/>
      <edge id="1716" label="1716" source="1258" target="1257" cy:directed="1"/>
      <edge id="1715" label="1715" source="1258" target="1272" cy:directed="1"/>
      <edge id="1714" label="1714" source="1258" target="1256" cy:directed="1"/>
      <edge id="1713" label="1713" source="1258" target="1255" cy:directed="1"/>
      <edge id="1712" label="1712" source="1257" target="1261" cy:directed="1"/>
      <edge id="1711" label="1711" source="1257" target="1314" cy:directed="1"/>
      <edge id="1710" label="1710" source="1257" target="1260" cy:directed="1"/>
      <edge id="1709" label="1709" source="1257" target="1256" cy:directed="1"/>
      <edge id="1708" label="1708" source="1257" target="1255" cy:directed="1"/>
      <edge id="1707" label="1707" source="1256" target="1261" cy:directed="1"/>
      <edge id="1668" label="1668" source="1247" target="1188" cy:directed="1"/>
      <edge id="1667" label="1667" source="1247" target="1246" cy:directed="1"/>
      <edge id="1666" label="1666" source="1247" target="1245" cy:directed="1"/>
      <edge id="1665" label="1665" source="1246" target="1188" cy:directed="1"/>
      <edge id="1664" label="1664" source="1246" target="1245" cy:directed="1"/>
      <edge id="1640" label="1640" source="1237" target="1185" cy:directed="1"/>
      <edge id="1639" label="1639" source="1237" target="1209" cy:directed="1"/>
      <edge id="1638" label="1638" source="1237" target="1207" cy:directed="1"/>
      <edge id="1637" label="1637" source="1237" target="1235" cy:directed="1"/>
      <edge id="1636" label="1636" source="1237" target="1233" cy:directed="1"/>
      <edge id="1635" label="1635" source="1237" target="1204" cy:directed="1"/>
      <edge id="1634" label="1634" source="1237" target="1229" cy:directed="1"/>
      <edge id="1633" label="1633" source="1236" target="1185" cy:directed="1"/>
      <edge id="1632" label="1632" source="1236" target="1237" cy:directed="1"/>
      <edge id="1631" label="1631" source="1236" target="1235" cy:directed="1"/>
      <edge id="1630" label="1630" source="1236" target="1233" cy:directed="1"/>
      <edge id="1629" label="1629" source="1236" target="1229" cy:directed="1"/>
      <edge id="1628" label="1628" source="1235" target="1185" cy:directed="1"/>
      <edge id="1627" label="1627" source="1234" target="1318" cy:directed="1"/>
      <edge id="1626" label="1626" source="1234" target="1185" cy:directed="1"/>
      <edge id="1625" label="1625" source="1234" target="1291" cy:directed="1"/>
      <edge id="1624" label="1624" source="1234" target="1290" cy:directed="1"/>
      <edge id="1623" label="1623" source="1234" target="1289" cy:directed="1"/>
      <edge id="1622" label="1622" source="1234" target="1237" cy:directed="1"/>
      <edge id="1621" label="1621" source="1234" target="1236" cy:directed="1"/>
      <edge id="1620" label="1620" source="1234" target="1235" cy:directed="1"/>
      <edge id="1619" label="1619" source="1234" target="1233" cy:directed="1"/>
      <edge id="1618" label="1618" source="1234" target="1232" cy:directed="1"/>
      <edge id="1617" label="1617" source="1234" target="1229" cy:directed="1"/>
      <edge id="1616" label="1616" source="1233" target="1185" cy:directed="1"/>
      <edge id="1615" label="1615" source="1233" target="1235" cy:directed="1"/>
      <edge id="1614" label="1614" source="1232" target="1185" cy:directed="1"/>
      <edge id="1613" label="1613" source="1232" target="1229" cy:directed="1"/>
      <edge id="1612" label="1612" source="1231" target="1185" cy:directed="1"/>
      <edge id="1611" label="1611" source="1231" target="1280" cy:directed="1"/>
      <edge id="1610" label="1610" source="1231" target="1277" cy:directed="1"/>
      <edge id="1609" label="1609" source="1231" target="1237" cy:directed="1"/>
      <edge id="1608" label="1608" source="1231" target="1272" cy:directed="1"/>
      <edge id="1607" label="1607" source="1231" target="1236" cy:directed="1"/>
      <edge id="1606" label="1606" source="1231" target="1235" cy:directed="1"/>
      <edge id="1605" label="1605" source="1231" target="1234" cy:directed="1"/>
      <edge id="1604" label="1604" source="1231" target="1233" cy:directed="1"/>
      <edge id="1603" label="1603" source="1231" target="1230" cy:directed="1"/>
      <edge id="1602" label="1602" source="1231" target="1229" cy:directed="1"/>
      <edge id="1601" label="1601" source="1230" target="1174" cy:directed="1"/>
      <edge id="1600" label="1600" source="1230" target="1185" cy:directed="1"/>
      <edge id="1599" label="1599" source="1230" target="1237" cy:directed="1"/>
      <edge id="1598" label="1598" source="1230" target="1236" cy:directed="1"/>
      <edge id="1597" label="1597" source="1230" target="1235" cy:directed="1"/>
      <edge id="1596" label="1596" source="1230" target="1234" cy:directed="1"/>
      <edge id="1595" label="1595" source="1230" target="1233" cy:directed="1"/>
      <edge id="1594" label="1594" source="1230" target="1232" cy:directed="1"/>
      <edge id="1593" label="1593" source="1230" target="1229" cy:directed="1"/>
      <edge id="1592" label="1592" source="1229" target="1185" cy:directed="1"/>
      <edge id="1591" label="1591" source="1229" target="1235" cy:directed="1"/>
      <edge id="1590" label="1590" source="1229" target="1233" cy:directed="1"/>
      <edge id="1589" label="1589" source="1228" target="1183" cy:directed="1"/>
      <edge id="1588" label="1588" source="1227" target="1183" cy:directed="1"/>
      <edge id="1587" label="1587" source="1227" target="1228" cy:directed="1"/>
      <edge id="1586" label="1586" source="1227" target="1226" cy:directed="1"/>
      <edge id="1585" label="1585" source="1227" target="1225" cy:directed="1"/>
      <edge id="1584" label="1584" source="1227" target="1224" cy:directed="1"/>
      <edge id="1583" label="1583" source="1227" target="1223" cy:directed="1"/>
      <edge id="1582" label="1582" source="1226" target="1183" cy:directed="1"/>
      <edge id="1581" label="1581" source="1226" target="1228" cy:directed="1"/>
      <edge id="1580" label="1580" source="1226" target="1225" cy:directed="1"/>
      <edge id="1579" label="1579" source="1226" target="1224" cy:directed="1"/>
      <edge id="1578" label="1578" source="1226" target="1223" cy:directed="1"/>
      <edge id="1577" label="1577" source="1225" target="1224" cy:directed="1"/>
      <edge id="1576" label="1576" source="1225" target="1223" cy:directed="1"/>
      <edge id="1575" label="1575" source="1224" target="1223" cy:directed="1"/>
      <edge id="1574" label="1574" source="1222" target="1320" cy:directed="1"/>
      <edge id="1573" label="1573" source="1222" target="1189" cy:directed="1"/>
      <edge id="1572" label="1572" source="1222" target="1221" cy:directed="1"/>
      <edge id="1571" label="1571" source="1222" target="1220" cy:directed="1"/>
      <edge id="1570" label="1570" source="1222" target="1219" cy:directed="1"/>
      <edge id="1569" label="1569" source="1222" target="1218" cy:directed="1"/>
      <edge id="1568" label="1568" source="1222" target="1217" cy:directed="1"/>
      <edge id="1567" label="1567" source="1222" target="1215" cy:directed="1"/>
      <edge id="1566" label="1566" source="1221" target="1215" cy:directed="1"/>
      <edge id="1565" label="1565" source="1220" target="1189" cy:directed="1"/>
      <edge id="1564" label="1564" source="1220" target="1221" cy:directed="1"/>
      <edge id="1563" label="1563" source="1220" target="1219" cy:directed="1"/>
      <edge id="1562" label="1562" source="1220" target="1218" cy:directed="1"/>
      <edge id="1561" label="1561" source="1220" target="1215" cy:directed="1"/>
      <edge id="1560" label="1560" source="1219" target="1189" cy:directed="1"/>
      <edge id="1559" label="1559" source="1219" target="1221" cy:directed="1"/>
      <edge id="1558" label="1558" source="1219" target="1215" cy:directed="1"/>
      <edge id="1557" label="1557" source="1218" target="1189" cy:directed="1"/>
      <edge id="1556" label="1556" source="1218" target="1221" cy:directed="1"/>
      <edge id="1555" label="1555" source="1218" target="1219" cy:directed="1"/>
      <edge id="1554" label="1554" source="1218" target="1215" cy:directed="1"/>
      <edge id="1553" label="1553" source="1217" target="1189" cy:directed="1"/>
      <edge id="1552" label="1552" source="1217" target="1221" cy:directed="1"/>
      <edge id="1551" label="1551" source="1217" target="1220" cy:directed="1"/>
      <edge id="1550" label="1550" source="1217" target="1219" cy:directed="1"/>
      <edge id="1549" label="1549" source="1217" target="1218" cy:directed="1"/>
      <edge id="1548" label="1548" source="1217" target="1215" cy:directed="1"/>
      <edge id="1547" label="1547" source="1216" target="1189" cy:directed="1"/>
      <edge id="1546" label="1546" source="1216" target="1220" cy:directed="1"/>
      <edge id="1545" label="1545" source="1216" target="1218" cy:directed="1"/>
      <edge id="1544" label="1544" source="1216" target="1217" cy:directed="1"/>
      <edge id="1543" label="1543" source="1216" target="1237" cy:directed="1"/>
      <edge id="1542" label="1542" source="1216" target="1215" cy:directed="1"/>
      <edge id="1541" label="1541" source="1216" target="1214" cy:directed="1"/>
      <edge id="1540" label="1540" source="1214" target="1320" cy:directed="1"/>
      <edge id="1539" label="1539" source="1214" target="1222" cy:directed="1"/>
      <edge id="1538" label="1538" source="1214" target="1221" cy:directed="1"/>
      <edge id="1537" label="1537" source="1214" target="1220" cy:directed="1"/>
      <edge id="1536" label="1536" source="1214" target="1219" cy:directed="1"/>
      <edge id="1535" label="1535" source="1214" target="1218" cy:directed="1"/>
      <edge id="1534" label="1534" source="1214" target="1217" cy:directed="1"/>
      <edge id="1524" label="1524" source="1209" target="1291" cy:directed="1"/>
      <edge id="1523" label="1523" source="1209" target="1290" cy:directed="1"/>
      <edge id="1522" label="1522" source="1209" target="1289" cy:directed="1"/>
      <edge id="1521" label="1521" source="1208" target="1308" cy:directed="1"/>
      <edge id="1520" label="1520" source="1208" target="1209" cy:directed="1"/>
      <edge id="1519" label="1519" source="1208" target="1291" cy:directed="1"/>
      <edge id="1518" label="1518" source="1208" target="1290" cy:directed="1"/>
      <edge id="1517" label="1517" source="1208" target="1289" cy:directed="1"/>
      <edge id="1516" label="1516" source="1208" target="1207" cy:directed="1"/>
      <edge id="1515" label="1515" source="1208" target="1204" cy:directed="1"/>
      <edge id="1514" label="1514" source="1207" target="1209" cy:directed="1"/>
      <edge id="1513" label="1513" source="1206" target="1209" cy:directed="1"/>
      <edge id="1512" label="1512" source="1206" target="1208" cy:directed="1"/>
      <edge id="1511" label="1511" source="1206" target="1207" cy:directed="1"/>
      <edge id="1510" label="1510" source="1206" target="1204" cy:directed="1"/>
      <edge id="1509" label="1509" source="1206" target="1202" cy:directed="1"/>
      <edge id="1508" label="1508" source="1206" target="1201" cy:directed="1"/>
      <edge id="1507" label="1507" source="1205" target="1209" cy:directed="1"/>
      <edge id="1506" label="1506" source="1205" target="1208" cy:directed="1"/>
      <edge id="1505" label="1505" source="1205" target="1207" cy:directed="1"/>
      <edge id="1504" label="1504" source="1205" target="1204" cy:directed="1"/>
      <edge id="1503" label="1503" source="1205" target="1202" cy:directed="1"/>
      <edge id="1502" label="1502" source="1204" target="1209" cy:directed="1"/>
      <edge id="1501" label="1501" source="1204" target="1207" cy:directed="1"/>
      <edge id="1500" label="1500" source="1203" target="1209" cy:directed="1"/>
      <edge id="1499" label="1499" source="1203" target="1208" cy:directed="1"/>
      <edge id="1498" label="1498" source="1203" target="1207" cy:directed="1"/>
      <edge id="1497" label="1497" source="1203" target="1205" cy:directed="1"/>
      <edge id="1496" label="1496" source="1203" target="1204" cy:directed="1"/>
      <edge id="1495" label="1495" source="1203" target="1202" cy:directed="1"/>
      <edge id="1494" label="1494" source="1202" target="1308" cy:directed="1"/>
      <edge id="1493" label="1493" source="1202" target="1209" cy:directed="1"/>
      <edge id="1492" label="1492" source="1202" target="1208" cy:directed="1"/>
      <edge id="1491" label="1491" source="1202" target="1207" cy:directed="1"/>
      <edge id="1490" label="1490" source="1202" target="1204" cy:directed="1"/>
      <edge id="1489" label="1489" source="1201" target="1209" cy:directed="1"/>
      <edge id="1488" label="1488" source="1201" target="1208" cy:directed="1"/>
      <edge id="1487" label="1487" source="1201" target="1207" cy:directed="1"/>
      <edge id="1486" label="1486" source="1201" target="1205" cy:directed="1"/>
      <edge id="1485" label="1485" source="1201" target="1204" cy:directed="1"/>
      <edge id="1484" label="1484" source="1201" target="1203" cy:directed="1"/>
      <edge id="1483" label="1483" source="1201" target="1202" cy:directed="1"/>
      <edge id="1445" label="1445" source="1190" target="1295" cy:directed="1"/>
      <edge id="1444" label="1444" source="1190" target="1294" cy:directed="1"/>
      <edge id="1443" label="1443" source="1190" target="1293" cy:directed="1"/>
      <edge id="1442" label="1442" source="1190" target="1292" cy:directed="1"/>
      <edge id="1441" label="1441" source="1190" target="1287" cy:directed="1"/>
      <edge id="1440" label="1440" source="1189" target="1215" cy:directed="1"/>
      <edge id="1439" label="1439" source="1188" target="1340" cy:directed="1"/>
      <edge id="1438" label="1438" source="1188" target="1339" cy:directed="1"/>
      <edge id="1437" label="1437" source="1188" target="1334" cy:directed="1"/>
      <edge id="1436" label="1436" source="1188" target="1333" cy:directed="1"/>
      <edge id="1435" label="1435" source="1188" target="1245" cy:directed="1"/>
      <edge id="1434" label="1434" source="1187" target="1271" cy:directed="1"/>
      <edge id="1433" label="1433" source="1187" target="1270" cy:directed="1"/>
      <edge id="1432" label="1432" source="1187" target="1268" cy:directed="1"/>
      <edge id="1428" label="1428" source="1184" target="1176" cy:directed="1"/>
      <edge id="1427" label="1427" source="1184" target="1312" cy:directed="1"/>
      <edge id="1426" label="1426" source="1184" target="1311" cy:directed="1"/>
      <edge id="1425" label="1425" source="1184" target="1310" cy:directed="1"/>
      <edge id="1424" label="1424" source="1184" target="1309" cy:directed="1"/>
      <edge id="1423" label="1423" source="1184" target="1308" cy:directed="1"/>
      <edge id="1422" label="1422" source="1184" target="1307" cy:directed="1"/>
      <edge id="1421" label="1421" source="1184" target="1306" cy:directed="1"/>
      <edge id="1420" label="1420" source="1184" target="1285" cy:directed="1"/>
      <edge id="1419" label="1419" source="1184" target="1284" cy:directed="1"/>
      <edge id="1418" label="1418" source="1184" target="1283" cy:directed="1"/>
      <edge id="1417" label="1417" source="1184" target="1282" cy:directed="1"/>
      <edge id="1416" label="1416" source="1184" target="1281" cy:directed="1"/>
      <edge id="1415" label="1415" source="1182" target="1176" cy:directed="1"/>
      <edge id="1414" label="1414" source="1182" target="1312" cy:directed="1"/>
      <edge id="1413" label="1413" source="1182" target="1311" cy:directed="1"/>
      <edge id="1412" label="1412" source="1182" target="1310" cy:directed="1"/>
      <edge id="1411" label="1411" source="1182" target="1309" cy:directed="1"/>
      <edge id="1410" label="1410" source="1182" target="1306" cy:directed="1"/>
      <edge id="1409" label="1409" source="1182" target="1262" cy:directed="1"/>
      <edge id="1408" label="1408" source="1182" target="1305" cy:directed="1"/>
      <edge id="1407" label="1407" source="1182" target="1261" cy:directed="1"/>
      <edge id="1406" label="1406" source="1182" target="1260" cy:directed="1"/>
      <edge id="1405" label="1405" source="1182" target="1256" cy:directed="1"/>
      <edge id="1404" label="1404" source="1181" target="1191" cy:directed="1"/>
      <edge id="1403" label="1403" source="1181" target="1339" cy:directed="1"/>
      <edge id="1402" label="1402" source="1181" target="1338" cy:directed="1"/>
      <edge id="1401" label="1401" source="1181" target="1334" cy:directed="1"/>
      <edge id="1400" label="1400" source="1181" target="1304" cy:directed="1"/>
      <edge id="1399" label="1399" source="1181" target="1271" cy:directed="1"/>
      <edge id="1398" label="1398" source="1181" target="1270" cy:directed="1"/>
      <edge id="1389" label="1389" source="1179" target="1308" cy:directed="1"/>
      <edge id="1388" label="1388" source="1179" target="1280" cy:directed="1"/>
      <edge id="1387" label="1387" source="1179" target="1279" cy:directed="1"/>
      <edge id="1386" label="1386" source="1178" target="1209" cy:directed="1"/>
      <edge id="1385" label="1385" source="1178" target="1208" cy:directed="1"/>
      <edge id="1384" label="1384" source="1178" target="1207" cy:directed="1"/>
      <edge id="1383" label="1383" source="1178" target="1205" cy:directed="1"/>
      <edge id="1382" label="1382" source="1178" target="1204" cy:directed="1"/>
      <edge id="1381" label="1381" source="1178" target="1203" cy:directed="1"/>
      <edge id="1380" label="1380" source="1178" target="1202" cy:directed="1"/>
      <edge id="1379" label="1379" source="1178" target="1201" cy:directed="1"/>
      <edge id="1377" label="1377" source="1176" target="1179" cy:directed="1"/>
      <edge id="1376" label="1376" source="1176" target="1312" cy:directed="1"/>
      <edge id="1375" label="1375" source="1176" target="1310" cy:directed="1"/>
      <edge id="1374" label="1374" source="1176" target="1309" cy:directed="1"/>
      <edge id="1373" label="1373" source="1176" target="1308" cy:directed="1"/>
      <edge id="1372" label="1372" source="1176" target="1305" cy:directed="1"/>
      <edge id="1371" label="1371" source="1176" target="1280" cy:directed="1"/>
      <edge id="1370" label="1370" source="1176" target="1279" cy:directed="1"/>
      <edge id="1369" label="1369" source="1176" target="1278" cy:directed="1"/>
      <edge id="1368" label="1368" source="1176" target="1277" cy:directed="1"/>
      <edge id="1366" label="1366" source="1174" target="1321" cy:directed="1"/>
      <edge id="1365" label="1365" source="1174" target="1320" cy:directed="1"/>
      <edge id="1364" label="1364" source="1174" target="1319" cy:directed="1"/>
      <edge id="1363" label="1363" source="1174" target="1318" cy:directed="1"/>
      <edge id="1362" label="1362" source="1174" target="1189" cy:directed="1"/>
      <edge id="1361" label="1361" source="1174" target="1317" cy:directed="1"/>
      <edge id="1360" label="1360" source="1174" target="1316" cy:directed="1"/>
      <edge id="1359" label="1359" source="1174" target="1220" cy:directed="1"/>
      <edge id="1358" label="1358" source="1174" target="1219" cy:directed="1"/>
      <edge id="1357" label="1357" source="1174" target="1315" cy:directed="1"/>
      <edge id="1356" label="1356" source="1174" target="1314" cy:directed="1"/>
      <edge id="1355" label="1355" source="1174" target="1218" cy:directed="1"/>
      <edge id="1354" label="1354" source="1174" target="1217" cy:directed="1"/>
      <edge id="1353" label="1353" source="1174" target="1237" cy:directed="1"/>
      <edge id="1352" label="1352" source="1174" target="1229" cy:directed="1"/>
    </graph>
  </att>
</graph>
