# Supplementary material for: A zebrafish screen reveals Renin-angiotensin system inhibitors as neuroprotective via mitochondrial restoration in dopamine neurons
Source: eLife journal article supplement (doi:10.7554/elife.69795), 2021-09-22
Supplement: fig5-data4 [file elife-69795-fig5-data4-v1.cys › CytoscapeSession-2021_03_12-09_32/session_vizmap.xml]

<?xml version="1.0" encoding="UTF-8" standalone="yes"?>
<vizmap id="VizMap-2021_03_12-09_32" documentVersion="3.0">
    <visualStyle name="size_rank_0">
        <network>
            <visualProperty default="0.0" name="NETWORK_CENTER_Z_LOCATION"/>
            <visualProperty default="0.0" name="NETWORK_CENTER_X_LOCATION"/>
            <visualProperty default="550.0" name="NETWORK_SIZE"/>
            <visualProperty default="400.0" name="NETWORK_HEIGHT"/>
            <visualProperty default="" name="NETWORK_TITLE"/>
            <visualProperty default="#EBEBEB" name="NETWORK_BACKGROUND_PAINT"/>
            <visualProperty default="1.0" name="NETWORK_SCALE_FACTOR"/>
            <visualProperty default="550.0" name="NETWORK_WIDTH"/>
            <visualProperty default="true" name="NETWORK_EDGE_SELECTION"/>
            <visualProperty default="0.0" name="NETWORK_CENTER_Y_LOCATION"/>
            <visualProperty default="true" name="NETWORK_NODE_SELECTION"/>
            <visualProperty default="0.0" name="NETWORK_DEPTH"/>
        </network>
        <node>
            <dependency value="true" name="nodeCustomGraphicsSizeSync"/>
            <dependency value="true" name="nodeSizeLocked"/>
            <visualProperty default="org.cytoscape.ding.customgraphics.NullCustomGraphics,0,[ Remove Graphics ]," name="NODE_CUSTOMGRAPHICS_2"/>
            <visualProperty default="9" name="NODE_LABEL_FONT_SIZE"/>
            <visualProperty default="" name="NODE_LABEL">
                <passthroughMapping attributeName="name" attributeType="string"/>
            </visualProperty>
            <visualProperty default="0.0" name="NODE_BORDER_WIDTH"/>
            <visualProperty default="50.0" name="NODE_WIDTH"/>
            <visualProperty default="50.0" name="NODE_CUSTOMGRAPHICS_SIZE_1"/>
            <visualProperty default="DefaultVisualizableVisualProperty(id=NODE_CUSTOMPAINT_8, name=Node Custom Paint 8)" name="NODE_CUSTOMPAINT_8"/>
            <visualProperty default="0.0" name="NODE_DEPTH"/>
            <visualProperty default="255" name="NODE_BORDER_TRANSPARENCY"/>
            <visualProperty default="DefaultVisualizableVisualProperty(id=NODE_CUSTOMPAINT_1, name=Node Custom Paint 1)" name="NODE_CUSTOMPAINT_1"/>
            <visualProperty default="DefaultVisualizableVisualProperty(id=NODE_CUSTOMPAINT_6, name=Node Custom Paint 6)" name="NODE_CUSTOMPAINT_6"/>
            <visualProperty default="DefaultVisualizableVisualProperty(id=NODE_CUSTOMPAINT_9, name=Node Custom Paint 9)" name="NODE_CUSTOMPAINT_9"/>
            <visualProperty default="50.0" name="NODE_CUSTOMGRAPHICS_SIZE_9"/>
            <visualProperty default="C,C,c,0.00,0.00" name="NODE_LABEL_POSITION"/>
            <visualProperty default="50.0" name="NODE_CUSTOMGRAPHICS_SIZE_5"/>
            <visualProperty default="org.cytoscape.ding.customgraphics.NullCustomGraphics,0,[ Remove Graphics ]," name="NODE_CUSTOMGRAPHICS_8"/>
            <visualProperty default="C,C,c,0.00,0.00" name="NODE_CUSTOMGRAPHICS_POSITION_3"/>
            <visualProperty default="true" name="NODE_NESTED_NETWORK_IMAGE_VISIBLE"/>
            <visualProperty default="50.0" name="NODE_CUSTOMGRAPHICS_SIZE_8"/>
            <visualProperty default="50.0" name="NODE_CUSTOMGRAPHICS_SIZE_4"/>
            <visualProperty default="true" name="NODE_VISIBLE"/>
            <visualProperty default="#787878" name="NODE_PAINT"/>
            <visualProperty default="org.cytoscape.ding.customgraphics.NullCustomGraphics,0,[ Remove Graphics ]," name="NODE_CUSTOMGRAPHICS_3"/>
            <visualProperty default="C,C,c,0.00,0.00" name="NODE_CUSTOMGRAPHICS_POSITION_7"/>
            <visualProperty default="SOLID" name="NODE_BORDER_STROKE"/>
            <visualProperty default="50.0" name="NODE_CUSTOMGRAPHICS_SIZE_2"/>
            <visualProperty default="org.cytoscape.ding.customgraphics.NullCustomGraphics,0,[ Remove Graphics ]," name="NODE_CUSTOMGRAPHICS_7"/>
            <visualProperty default="12.0" name="NODE_SIZE">
                <continuousMapping attributeName="diffusion_output_rank" attributeType="float">
                    <continuousMappingPoint attrValue="0.0" equalValue="39.11245096536507" greaterValue="39.11245096536507" lesserValue="1.0"/>
                    <continuousMappingPoint attrValue="99.0" equalValue="13.821692732043733" greaterValue="1.0" lesserValue="13.821692732043733"/>
                </continuousMapping>
            </visualProperty>
            <visualProperty default="false" name="NODE_SELECTED"/>
            <visualProperty default="50.0" name="NODE_CUSTOMGRAPHICS_SIZE_3"/>
            <visualProperty default="50.0" name="NODE_HEIGHT"/>
            <visualProperty default="DefaultVisualizableVisualProperty(id=NODE_CUSTOMPAINT_4, name=Node Custom Paint 4)" name="NODE_CUSTOMPAINT_4"/>
            <visualProperty default="C,C,c,0.00,0.00" name="NODE_CUSTOMGRAPHICS_POSITION_4"/>
            <visualProperty default="DefaultVisualizableVisualProperty(id=NODE_CUSTOMPAINT_3, name=Node Custom Paint 3)" name="NODE_CUSTOMPAINT_3"/>
            <visualProperty default="ROUND_RECTANGLE" name="COMPOUND_NODE_SHAPE"/>
            <visualProperty default="10.0" name="COMPOUND_NODE_PADDING"/>
            <visualProperty default="org.cytoscape.ding.customgraphics.NullCustomGraphics,0,[ Remove Graphics ]," name="NODE_CUSTOMGRAPHICS_4"/>
            <visualProperty default="#CCCCFF" name="NODE_FILL_COLOR"/>
            <visualProperty default="C,C,c,0.00,0.00" name="NODE_CUSTOMGRAPHICS_POSITION_9"/>
            <visualProperty default="DefaultVisualizableVisualProperty(id=NODE_CUSTOMPAINT_5, name=Node Custom Paint 5)" name="NODE_CUSTOMPAINT_5"/>
            <visualProperty default="SansSerif.plain,plain,12" name="NODE_LABEL_FONT_FACE"/>
            <visualProperty default="50.0" name="NODE_CUSTOMGRAPHICS_SIZE_6"/>
            <visualProperty default="org.cytoscape.ding.customgraphics.NullCustomGraphics,0,[ Remove Graphics ]," name="NODE_CUSTOMGRAPHICS_5"/>
            <visualProperty default="C,C,c,0.00,0.00" name="NODE_CUSTOMGRAPHICS_POSITION_1"/>
            <visualProperty default="0.0" name="NODE_Z_LOCATION"/>
            <visualProperty default="0.0" name="NODE_X_LOCATION"/>
            <visualProperty default="RECTANGLE" name="NODE_SHAPE"/>
            <visualProperty default="org.cytoscape.ding.customgraphics.NullCustomGraphics,0,[ Remove Graphics ]," name="NODE_CUSTOMGRAPHICS_6"/>
            <visualProperty default="DefaultVisualizableVisualProperty(id=NODE_CUSTOMPAINT_2, name=Node Custom Paint 2)" name="NODE_CUSTOMPAINT_2"/>
            <visualProperty default="C,C,c,0.00,0.00" name="NODE_CUSTOMGRAPHICS_POSITION_8"/>
            <visualProperty default="C,C,c,0.00,0.00" name="NODE_CUSTOMGRAPHICS_POSITION_5"/>
            <visualProperty default="C,C,c,0.00,0.00" name="NODE_CUSTOMGRAPHICS_POSITION_6"/>
            <visualProperty default="" name="NODE_TOOLTIP"/>
            <visualProperty default="#333333" name="NODE_LABEL_COLOR"/>
            <visualProperty default="0.0" name="NODE_Y_LOCATION"/>
            <visualProperty default="#FFFF00" name="NODE_SELECTED_PAINT"/>
            <visualProperty default="255" name="NODE_LABEL_TRANSPARENCY"/>
            <visualProperty default="#000000" name="NODE_BORDER_PAINT"/>
            <visualProperty default="C,C,c,0.00,0.00" name="NODE_CUSTOMGRAPHICS_POSITION_2"/>
            <visualProperty default="DefaultVisualizableVisualProperty(id=NODE_CUSTOMPAINT_7, name=Node Custom Paint 7)" name="NODE_CUSTOMPAINT_7"/>
            <visualProperty default="200.0" name="NODE_LABEL_WIDTH"/>
            <visualProperty default="org.cytoscape.ding.customgraphics.NullCustomGraphics,0,[ Remove Graphics ]," name="NODE_CUSTOMGRAPHICS_1"/>
            <visualProperty default="255" name="NODE_TRANSPARENCY"/>
            <visualProperty default="org.cytoscape.ding.customgraphics.NullCustomGraphics,0,[ Remove Graphics ]," name="NODE_CUSTOMGRAPHICS_9"/>
            <visualProperty default="50.0" name="NODE_CUSTOMGRAPHICS_SIZE_7"/>
        </node>
        <edge>
            <dependency value="false" name="arrowColorMatchesEdge"/>
            <visualProperty default="#000000" name="EDGE_SOURCE_ARROW_UNSELECTED_PAINT"/>
            <visualProperty default="#404040" name="EDGE_UNSELECTED_PAINT"/>
            <visualProperty default="#808080" name="EDGE_PAINT"/>
            <visualProperty default="" name="EDGE_TOOLTIP"/>
            <visualProperty default="#FFFF00" name="EDGE_SOURCE_ARROW_SELECTED_PAINT"/>
            <visualProperty default="255" name="EDGE_TRANSPARENCY"/>
            <visualProperty default="NONE" name="EDGE_TARGET_ARROW_SHAPE"/>
            <visualProperty default="SOLID" name="EDGE_LINE_TYPE"/>
            <visualProperty default="10" name="EDGE_LABEL_FONT_SIZE"/>
            <visualProperty default="2.0" name="EDGE_WIDTH"/>
            <visualProperty default="true" name="EDGE_VISIBLE"/>
            <visualProperty default="255" name="EDGE_LABEL_TRANSPARENCY"/>
            <visualProperty default="SansSerif.plain,plain,10" name="EDGE_LABEL_FONT_FACE"/>
            <visualProperty default="#4C4C4C" name="EDGE_STROKE_UNSELECTED_PAINT"/>
            <visualProperty default="" name="EDGE_BEND"/>
            <visualProperty default="#000000" name="EDGE_TARGET_ARROW_UNSELECTED_PAINT"/>
            <visualProperty default="NONE" name="EDGE_SOURCE_ARROW_SHAPE"/>
            <visualProperty default="#FF0000" name="EDGE_STROKE_SELECTED_PAINT"/>
            <visualProperty default="true" name="EDGE_CURVED"/>
            <visualProperty default="#FFFF00" name="EDGE_TARGET_ARROW_SELECTED_PAINT"/>
            <visualProperty default="false" name="EDGE_SELECTED"/>
            <visualProperty default="#FF0000" name="EDGE_SELECTED_PAINT"/>
            <visualProperty default="" name="EDGE_LABEL"/>
            <visualProperty default="#000000" name="EDGE_LABEL_COLOR"/>
            <visualProperty default="200.0" name="EDGE_LABEL_WIDTH"/>
        </edge>
    </visualStyle>
    <visualStyle name="default">
        <network>
            <visualProperty default="0.0" name="NETWORK_CENTER_Z_LOCATION"/>
            <visualProperty default="0.0" name="NETWORK_CENTER_X_LOCATION"/>
            <visualProperty default="550.0" name="NETWORK_SIZE"/>
            <visualProperty default="400.0" name="NETWORK_HEIGHT"/>
            <visualProperty default="" name="NETWORK_TITLE"/>
            <visualProperty default="#FFFFFF" name="NETWORK_BACKGROUND_PAINT"/>
            <visualProperty default="1.0" name="NETWORK_SCALE_FACTOR"/>
            <visualProperty default="550.0" name="NETWORK_WIDTH"/>
            <visualProperty default="true" name="NETWORK_EDGE_SELECTION"/>
            <visualProperty default="0.0" name="NETWORK_CENTER_Y_LOCATION"/>
            <visualProperty default="true" name="NETWORK_NODE_SELECTION"/>
            <visualProperty default="0.0" name="NETWORK_DEPTH"/>
        </network>
        <node>
            <dependency value="true" name="nodeCustomGraphicsSizeSync"/>
            <dependency value="false" name="nodeSizeLocked"/>
            <visualProperty default="org.cytoscape.ding.customgraphics.NullCustomGraphics,0,[ Remove Graphics ]," name="NODE_CUSTOMGRAPHICS_2"/>
            <visualProperty default="12" name="NODE_LABEL_FONT_SIZE"/>
            <visualProperty default="" name="NODE_LABEL">
                <passthroughMapping attributeName="name" attributeType="string"/>
            </visualProperty>
            <visualProperty default="0.0" name="NODE_BORDER_WIDTH"/>
            <visualProperty default="75.0" name="NODE_WIDTH"/>
            <visualProperty default="50.0" name="NODE_CUSTOMGRAPHICS_SIZE_1"/>
            <visualProperty default="DefaultVisualizableVisualProperty(id=NODE_CUSTOMPAINT_8, name=Node Custom Paint 8)" name="NODE_CUSTOMPAINT_8"/>
            <visualProperty default="0.0" name="NODE_DEPTH"/>
            <visualProperty default="255" name="NODE_BORDER_TRANSPARENCY"/>
            <visualProperty default="DefaultVisualizableVisualProperty(id=NODE_CUSTOMPAINT_1, name=Node Custom Paint 1)" name="NODE_CUSTOMPAINT_1"/>
            <visualProperty default="DefaultVisualizableVisualProperty(id=NODE_CUSTOMPAINT_6, name=Node Custom Paint 6)" name="NODE_CUSTOMPAINT_6"/>
            <visualProperty default="DefaultVisualizableVisualProperty(id=NODE_CUSTOMPAINT_9, name=Node Custom Paint 9)" name="NODE_CUSTOMPAINT_9"/>
            <visualProperty default="50.0" name="NODE_CUSTOMGRAPHICS_SIZE_9"/>
            <visualProperty default="C,C,c,0.00,0.00" name="NODE_LABEL_POSITION"/>
            <visualProperty default="50.0" name="NODE_CUSTOMGRAPHICS_SIZE_5"/>
            <visualProperty default="org.cytoscape.ding.customgraphics.NullCustomGraphics,0,[ Remove Graphics ]," name="NODE_CUSTOMGRAPHICS_8"/>
            <visualProperty default="C,C,c,0.00,0.00" name="NODE_CUSTOMGRAPHICS_POSITION_3"/>
            <visualProperty default="true" name="NODE_NESTED_NETWORK_IMAGE_VISIBLE"/>
            <visualProperty default="50.0" name="NODE_CUSTOMGRAPHICS_SIZE_8"/>
            <visualProperty default="50.0" name="NODE_CUSTOMGRAPHICS_SIZE_4"/>
            <visualProperty default="true" name="NODE_VISIBLE"/>
            <visualProperty default="#1E90FF" name="NODE_PAINT"/>
            <visualProperty default="org.cytoscape.ding.customgraphics.NullCustomGraphics,0,[ Remove Graphics ]," name="NODE_CUSTOMGRAPHICS_3"/>
            <visualProperty default="C,C,c,0.00,0.00" name="NODE_CUSTOMGRAPHICS_POSITION_7"/>
            <visualProperty default="SOLID" name="NODE_BORDER_STROKE"/>
            <visualProperty default="50.0" name="NODE_CUSTOMGRAPHICS_SIZE_2"/>
            <visualProperty default="org.cytoscape.ding.customgraphics.NullCustomGraphics,0,[ Remove Graphics ]," name="NODE_CUSTOMGRAPHICS_7"/>
            <visualProperty default="35.0" name="NODE_SIZE"/>
            <visualProperty default="false" name="NODE_SELECTED"/>
            <visualProperty default="50.0" name="NODE_CUSTOMGRAPHICS_SIZE_3"/>
            <visualProperty default="35.0" name="NODE_HEIGHT"/>
            <visualProperty default="DefaultVisualizableVisualProperty(id=NODE_CUSTOMPAINT_4, name=Node Custom Paint 4)" name="NODE_CUSTOMPAINT_4"/>
            <visualProperty default="C,C,c,0.00,0.00" name="NODE_CUSTOMGRAPHICS_POSITION_4"/>
            <visualProperty default="DefaultVisualizableVisualProperty(id=NODE_CUSTOMPAINT_3, name=Node Custom Paint 3)" name="NODE_CUSTOMPAINT_3"/>
            <visualProperty default="ROUND_RECTANGLE" name="COMPOUND_NODE_SHAPE"/>
            <visualProperty default="10.0" name="COMPOUND_NODE_PADDING"/>
            <visualProperty default="org.cytoscape.ding.customgraphics.NullCustomGraphics,0,[ Remove Graphics ]," name="NODE_CUSTOMGRAPHICS_4"/>
            <visualProperty default="#89D0F5" name="NODE_FILL_COLOR"/>
            <visualProperty default="C,C,c,0.00,0.00" name="NODE_CUSTOMGRAPHICS_POSITION_9"/>
            <visualProperty default="DefaultVisualizableVisualProperty(id=NODE_CUSTOMPAINT_5, name=Node Custom Paint 5)" name="NODE_CUSTOMPAINT_5"/>
            <visualProperty default="SansSerif.plain,plain,12" name="NODE_LABEL_FONT_FACE"/>
            <visualProperty default="50.0" name="NODE_CUSTOMGRAPHICS_SIZE_6"/>
            <visualProperty default="org.cytoscape.ding.customgraphics.NullCustomGraphics,0,[ Remove Graphics ]," name="NODE_CUSTOMGRAPHICS_5"/>
            <visualProperty default="C,C,c,0.00,0.00" name="NODE_CUSTOMGRAPHICS_POSITION_1"/>
            <visualProperty default="0.0" name="NODE_Z_LOCATION"/>
            <visualProperty default="0.0" name="NODE_X_LOCATION"/>
            <visualProperty default="ROUND_RECTANGLE" name="NODE_SHAPE"/>
            <visualProperty default="org.cytoscape.ding.customgraphics.NullCustomGraphics,0,[ Remove Graphics ]," name="NODE_CUSTOMGRAPHICS_6"/>
            <visualProperty default="DefaultVisualizableVisualProperty(id=NODE_CUSTOMPAINT_2, name=Node Custom Paint 2)" name="NODE_CUSTOMPAINT_2"/>
            <visualProperty default="C,C,c,0.00,0.00" name="NODE_CUSTOMGRAPHICS_POSITION_8"/>
            <visualProperty default="C,C,c,0.00,0.00" name="NODE_CUSTOMGRAPHICS_POSITION_5"/>
            <visualProperty default="C,C,c,0.00,0.00" name="NODE_CUSTOMGRAPHICS_POSITION_6"/>
            <visualProperty default="" name="NODE_TOOLTIP"/>
            <visualProperty default="#000000" name="NODE_LABEL_COLOR"/>
            <visualProperty default="0.0" name="NODE_Y_LOCATION"/>
            <visualProperty default="#FFFF00" name="NODE_SELECTED_PAINT"/>
            <visualProperty default="255" name="NODE_LABEL_TRANSPARENCY"/>
            <visualProperty default="#CCCCCC" name="NODE_BORDER_PAINT"/>
            <visualProperty default="C,C,c,0.00,0.00" name="NODE_CUSTOMGRAPHICS_POSITION_2"/>
            <visualProperty default="DefaultVisualizableVisualProperty(id=NODE_CUSTOMPAINT_7, name=Node Custom Paint 7)" name="NODE_CUSTOMPAINT_7"/>
            <visualProperty default="200.0" name="NODE_LABEL_WIDTH"/>
            <visualProperty default="org.cytoscape.ding.customgraphics.NullCustomGraphics,0,[ Remove Graphics ]," name="NODE_CUSTOMGRAPHICS_1"/>
            <visualProperty default="255" name="NODE_TRANSPARENCY"/>
            <visualProperty default="org.cytoscape.ding.customgraphics.NullCustomGraphics,0,[ Remove Graphics ]," name="NODE_CUSTOMGRAPHICS_9"/>
            <visualProperty default="50.0" name="NODE_CUSTOMGRAPHICS_SIZE_7"/>
        </node>
        <edge>
            <dependency value="false" name="arrowColorMatchesEdge"/>
            <visualProperty default="#000000" name="EDGE_SOURCE_ARROW_UNSELECTED_PAINT"/>
            <visualProperty default="#404040" name="EDGE_UNSELECTED_PAINT"/>
            <visualProperty default="#323232" name="EDGE_PAINT"/>
            <visualProperty default="" name="EDGE_TOOLTIP"/>
            <visualProperty default="#FFFF00" name="EDGE_SOURCE_ARROW_SELECTED_PAINT"/>
            <visualProperty default="255" name="EDGE_TRANSPARENCY"/>
            <visualProperty default="NONE" name="EDGE_TARGET_ARROW_SHAPE"/>
            <visualProperty default="SOLID" name="EDGE_LINE_TYPE"/>
            <visualProperty default="10" name="EDGE_LABEL_FONT_SIZE"/>
            <visualProperty default="2.0" name="EDGE_WIDTH"/>
            <visualProperty default="true" name="EDGE_VISIBLE"/>
            <visualProperty default="255" name="EDGE_LABEL_TRANSPARENCY"/>
            <visualProperty default="Dialog.plain,plain,10" name="EDGE_LABEL_FONT_FACE"/>
            <visualProperty default="#848484" name="EDGE_STROKE_UNSELECTED_PAINT"/>
            <visualProperty default="" name="EDGE_BEND"/>
            <visualProperty default="#000000" name="EDGE_TARGET_ARROW_UNSELECTED_PAINT"/>
            <visualProperty default="NONE" name="EDGE_SOURCE_ARROW_SHAPE"/>
            <visualProperty default="#FF0000" name="EDGE_STROKE_SELECTED_PAINT"/>
            <visualProperty default="true" name="EDGE_CURVED"/>
            <visualProperty default="#FFFF00" name="EDGE_TARGET_ARROW_SELECTED_PAINT"/>
            <visualProperty default="false" name="EDGE_SELECTED"/>
            <visualProperty default="#FF0000" name="EDGE_SELECTED_PAINT"/>
            <visualProperty default="" name="EDGE_LABEL"/>
            <visualProperty default="#000000" name="EDGE_LABEL_COLOR"/>
            <visualProperty default="200.0" name="EDGE_LABEL_WIDTH"/>
        </edge>
    </visualStyle>
    <visualStyle name="size_rank">
        <network>
            <visualProperty default="0.0" name="NETWORK_CENTER_Z_LOCATION"/>
            <visualProperty default="0.0" name="NETWORK_CENTER_X_LOCATION"/>
            <visualProperty default="550.0" name="NETWORK_SIZE"/>
            <visualProperty default="400.0" name="NETWORK_HEIGHT"/>
            <visualProperty default="" name="NETWORK_TITLE"/>
            <visualProperty default="#EBEBEB" name="NETWORK_BACKGROUND_PAINT"/>
            <visualProperty default="1.0" name="NETWORK_SCALE_FACTOR"/>
            <visualProperty default="550.0" name="NETWORK_WIDTH"/>
            <visualProperty default="true" name="NETWORK_EDGE_SELECTION"/>
            <visualProperty default="0.0" name="NETWORK_CENTER_Y_LOCATION"/>
            <visualProperty default="true" name="NETWORK_NODE_SELECTION"/>
            <visualProperty default="0.0" name="NETWORK_DEPTH"/>
        </network>
        <node>
            <dependency value="true" name="nodeCustomGraphicsSizeSync"/>
            <dependency value="true" name="nodeSizeLocked"/>
            <visualProperty default="org.cytoscape.ding.customgraphics.NullCustomGraphics,0,[ Remove Graphics ]," name="NODE_CUSTOMGRAPHICS_2"/>
            <visualProperty default="9" name="NODE_LABEL_FONT_SIZE"/>
            <visualProperty default="" name="NODE_LABEL">
                <passthroughMapping attributeName="name" attributeType="string"/>
            </visualProperty>
            <visualProperty default="0.0" name="NODE_BORDER_WIDTH"/>
            <visualProperty default="50.0" name="NODE_WIDTH"/>
            <visualProperty default="50.0" name="NODE_CUSTOMGRAPHICS_SIZE_1"/>
            <visualProperty default="DefaultVisualizableVisualProperty(id=NODE_CUSTOMPAINT_8, name=Node Custom Paint 8)" name="NODE_CUSTOMPAINT_8"/>
            <visualProperty default="0.0" name="NODE_DEPTH"/>
            <visualProperty default="255" name="NODE_BORDER_TRANSPARENCY"/>
            <visualProperty default="DefaultVisualizableVisualProperty(id=NODE_CUSTOMPAINT_1, name=Node Custom Paint 1)" name="NODE_CUSTOMPAINT_1"/>
            <visualProperty default="DefaultVisualizableVisualProperty(id=NODE_CUSTOMPAINT_6, name=Node Custom Paint 6)" name="NODE_CUSTOMPAINT_6"/>
            <visualProperty default="DefaultVisualizableVisualProperty(id=NODE_CUSTOMPAINT_9, name=Node Custom Paint 9)" name="NODE_CUSTOMPAINT_9"/>
            <visualProperty default="50.0" name="NODE_CUSTOMGRAPHICS_SIZE_9"/>
            <visualProperty default="C,C,c,0.00,0.00" name="NODE_LABEL_POSITION"/>
            <visualProperty default="50.0" name="NODE_CUSTOMGRAPHICS_SIZE_5"/>
            <visualProperty default="org.cytoscape.ding.customgraphics.NullCustomGraphics,0,[ Remove Graphics ]," name="NODE_CUSTOMGRAPHICS_8"/>
            <visualProperty default="C,C,c,0.00,0.00" name="NODE_CUSTOMGRAPHICS_POSITION_3"/>
            <visualProperty default="true" name="NODE_NESTED_NETWORK_IMAGE_VISIBLE"/>
            <visualProperty default="50.0" name="NODE_CUSTOMGRAPHICS_SIZE_8"/>
            <visualProperty default="50.0" name="NODE_CUSTOMGRAPHICS_SIZE_4"/>
            <visualProperty default="true" name="NODE_VISIBLE"/>
            <visualProperty default="#787878" name="NODE_PAINT"/>
            <visualProperty default="org.cytoscape.ding.customgraphics.NullCustomGraphics,0,[ Remove Graphics ]," name="NODE_CUSTOMGRAPHICS_3"/>
            <visualProperty default="C,C,c,0.00,0.00" name="NODE_CUSTOMGRAPHICS_POSITION_7"/>
            <visualProperty default="SOLID" name="NODE_BORDER_STROKE"/>
            <visualProperty default="50.0" name="NODE_CUSTOMGRAPHICS_SIZE_2"/>
            <visualProperty default="org.cytoscape.ding.customgraphics.NullCustomGraphics,0,[ Remove Graphics ]," name="NODE_CUSTOMGRAPHICS_7"/>
            <visualProperty default="12.0" name="NODE_SIZE">
                <continuousMapping attributeName="diffusion_output_rank" attributeType="float">
                    <continuousMappingPoint attrValue="0.0" equalValue="39.11245096536507" greaterValue="39.11245096536507" lesserValue="1.0"/>
                    <continuousMappingPoint attrValue="99.0" equalValue="13.821692732043733" greaterValue="1.0" lesserValue="13.821692732043733"/>
                </continuousMapping>
            </visualProperty>
            <visualProperty default="false" name="NODE_SELECTED"/>
            <visualProperty default="50.0" name="NODE_CUSTOMGRAPHICS_SIZE_3"/>
            <visualProperty default="50.0" name="NODE_HEIGHT"/>
            <visualProperty default="DefaultVisualizableVisualProperty(id=NODE_CUSTOMPAINT_4, name=Node Custom Paint 4)" name="NODE_CUSTOMPAINT_4"/>
            <visualProperty default="C,C,c,0.00,0.00" name="NODE_CUSTOMGRAPHICS_POSITION_4"/>
            <visualProperty default="DefaultVisualizableVisualProperty(id=NODE_CUSTOMPAINT_3, name=Node Custom Paint 3)" name="NODE_CUSTOMPAINT_3"/>
            <visualProperty default="ROUND_RECTANGLE" name="COMPOUND_NODE_SHAPE"/>
            <visualProperty default="10.0" name="COMPOUND_NODE_PADDING"/>
            <visualProperty default="org.cytoscape.ding.customgraphics.NullCustomGraphics,0,[ Remove Graphics ]," name="NODE_CUSTOMGRAPHICS_4"/>
            <visualProperty default="#CCCCFF" name="NODE_FILL_COLOR"/>
            <visualProperty default="C,C,c,0.00,0.00" name="NODE_CUSTOMGRAPHICS_POSITION_9"/>
            <visualProperty default="DefaultVisualizableVisualProperty(id=NODE_CUSTOMPAINT_5, name=Node Custom Paint 5)" name="NODE_CUSTOMPAINT_5"/>
            <visualProperty default="SansSerif.plain,plain,12" name="NODE_LABEL_FONT_FACE"/>
            <visualProperty default="50.0" name="NODE_CUSTOMGRAPHICS_SIZE_6"/>
            <visualProperty default="org.cytoscape.ding.customgraphics.NullCustomGraphics,0,[ Remove Graphics ]," name="NODE_CUSTOMGRAPHICS_5"/>
            <visualProperty default="C,C,c,0.00,0.00" name="NODE_CUSTOMGRAPHICS_POSITION_1"/>
            <visualProperty default="0.0" name="NODE_Z_LOCATION"/>
            <visualProperty default="0.0" name="NODE_X_LOCATION"/>
            <visualProperty default="RECTANGLE" name="NODE_SHAPE"/>
            <visualProperty default="org.cytoscape.ding.customgraphics.NullCustomGraphics,0,[ Remove Graphics ]," name="NODE_CUSTOMGRAPHICS_6"/>
            <visualProperty default="DefaultVisualizableVisualProperty(id=NODE_CUSTOMPAINT_2, name=Node Custom Paint 2)" name="NODE_CUSTOMPAINT_2"/>
            <visualProperty default="C,C,c,0.00,0.00" name="NODE_CUSTOMGRAPHICS_POSITION_8"/>
            <visualProperty default="C,C,c,0.00,0.00" name="NODE_CUSTOMGRAPHICS_POSITION_5"/>
            <visualProperty default="C,C,c,0.00,0.00" name="NODE_CUSTOMGRAPHICS_POSITION_6"/>
            <visualProperty default="" name="NODE_TOOLTIP"/>
            <visualProperty default="#333333" name="NODE_LABEL_COLOR"/>
            <visualProperty default="0.0" name="NODE_Y_LOCATION"/>
            <visualProperty default="#FFFF00" name="NODE_SELECTED_PAINT"/>
            <visualProperty default="255" name="NODE_LABEL_TRANSPARENCY"/>
            <visualProperty default="#000000" name="NODE_BORDER_PAINT"/>
            <visualProperty default="C,C,c,0.00,0.00" name="NODE_CUSTOMGRAPHICS_POSITION_2"/>
            <visualProperty default="DefaultVisualizableVisualProperty(id=NODE_CUSTOMPAINT_7, name=Node Custom Paint 7)" name="NODE_CUSTOMPAINT_7"/>
            <visualProperty default="200.0" name="NODE_LABEL_WIDTH"/>
            <visualProperty default="org.cytoscape.ding.customgraphics.NullCustomGraphics,0,[ Remove Graphics ]," name="NODE_CUSTOMGRAPHICS_1"/>
            <visualProperty default="255" name="NODE_TRANSPARENCY"/>
            <visualProperty default="org.cytoscape.ding.customgraphics.NullCustomGraphics,0,[ Remove Graphics ]," name="NODE_CUSTOMGRAPHICS_9"/>
            <visualProperty default="50.0" name="NODE_CUSTOMGRAPHICS_SIZE_7"/>
        </node>
        <edge>
            <dependency value="false" name="arrowColorMatchesEdge"/>
            <visualProperty default="#000000" name="EDGE_SOURCE_ARROW_UNSELECTED_PAINT"/>
            <visualProperty default="#404040" name="EDGE_UNSELECTED_PAINT"/>
            <visualProperty default="#808080" name="EDGE_PAINT"/>
            <visualProperty default="" name="EDGE_TOOLTIP"/>
            <visualProperty default="#FFFF00" name="EDGE_SOURCE_ARROW_SELECTED_PAINT"/>
            <visualProperty default="255" name="EDGE_TRANSPARENCY"/>
            <visualProperty default="NONE" name="EDGE_TARGET_ARROW_SHAPE"/>
            <visualProperty default="SOLID" name="EDGE_LINE_TYPE"/>
            <visualProperty default="10" name="EDGE_LABEL_FONT_SIZE"/>
            <visualProperty default="2.0" name="EDGE_WIDTH"/>
            <visualProperty default="true" name="EDGE_VISIBLE"/>
            <visualProperty default="255" name="EDGE_LABEL_TRANSPARENCY"/>
            <visualProperty default="SansSerif.plain,plain,10" name="EDGE_LABEL_FONT_FACE"/>
            <visualProperty default="#4C4C4C" name="EDGE_STROKE_UNSELECTED_PAINT"/>
            <visualProperty default="" name="EDGE_BEND"/>
            <visualProperty default="#000000" name="EDGE_TARGET_ARROW_UNSELECTED_PAINT"/>
            <visualProperty default="NONE" name="EDGE_SOURCE_ARROW_SHAPE"/>
            <visualProperty default="#FF0000" name="EDGE_STROKE_SELECTED_PAINT"/>
            <visualProperty default="true" name="EDGE_CURVED"/>
            <visualProperty default="#FFFF00" name="EDGE_TARGET_ARROW_SELECTED_PAINT"/>
            <visualProperty default="false" name="EDGE_SELECTED"/>
            <visualProperty default="#FF0000" name="EDGE_SELECTED_PAINT"/>
            <visualProperty default="" name="EDGE_LABEL"/>
            <visualProperty default="#000000" name="EDGE_LABEL_COLOR"/>
            <visualProperty default="200.0" name="EDGE_LABEL_WIDTH"/>
        </edge>
    </visualStyle>
    <visualStyle name="ColorByCluster">
        <network>
            <visualProperty default="false" name="NETWORK_FORCE_HIGH_DETAIL"/>
            <visualProperty default="false" name="NETWORK_NODE_LABEL_SELECTION"/>
            <visualProperty default="0.0" name="NETWORK_CENTER_Z_LOCATION"/>
            <visualProperty default="0.0" name="NETWORK_CENTER_X_LOCATION"/>
            <visualProperty default="550.0" name="NETWORK_SIZE"/>
            <visualProperty default="400.0" name="NETWORK_HEIGHT"/>
            <visualProperty default="" name="NETWORK_TITLE"/>
            <visualProperty default="#FFFFFF" name="NETWORK_BACKGROUND_PAINT"/>
            <visualProperty default="1.0" name="NETWORK_SCALE_FACTOR"/>
            <visualProperty default="550.0" name="NETWORK_WIDTH"/>
            <visualProperty default="false" name="NETWORK_ANNOTATION_SELECTION"/>
            <visualProperty default="true" name="NETWORK_EDGE_SELECTION"/>
            <visualProperty default="0.0" name="NETWORK_CENTER_Y_LOCATION"/>
            <visualProperty default="true" name="NETWORK_NODE_SELECTION"/>
            <visualProperty default="0.0" name="NETWORK_DEPTH"/>
        </network>
        <node>
            <dependency value="true" name="nodeCustomGraphicsSizeSync"/>
            <dependency value="true" name="nodeSizeLocked"/>
            <visualProperty default="org.cytoscape.ding.customgraphics.NullCustomGraphics,0,[ Remove Graphics ]," name="NODE_CUSTOMGRAPHICS_2"/>
            <visualProperty default="26" name="NODE_LABEL_FONT_SIZE"/>
            <visualProperty default="" name="NODE_LABEL"/>
            <visualProperty default="4.0" name="NODE_BORDER_WIDTH"/>
            <visualProperty default="70.0" name="NODE_WIDTH"/>
            <visualProperty default="50.0" name="NODE_CUSTOMGRAPHICS_SIZE_1"/>
            <visualProperty default="DefaultVisualizableVisualProperty(id=NODE_CUSTOMPAINT_8, name=Node Custom Paint 8)" name="NODE_CUSTOMPAINT_8"/>
            <visualProperty default="0.0" name="NODE_DEPTH"/>
            <visualProperty default="255" name="NODE_BORDER_TRANSPARENCY"/>
            <visualProperty default="DefaultVisualizableVisualProperty(id=NODE_CUSTOMPAINT_1, name=Node Custom Paint 1)" name="NODE_CUSTOMPAINT_1"/>
            <visualProperty default="DefaultVisualizableVisualProperty(id=NODE_CUSTOMPAINT_6, name=Node Custom Paint 6)" name="NODE_CUSTOMPAINT_6"/>
            <visualProperty default="DefaultVisualizableVisualProperty(id=NODE_CUSTOMPAINT_9, name=Node Custom Paint 9)" name="NODE_CUSTOMPAINT_9"/>
            <visualProperty default="50.0" name="NODE_CUSTOMGRAPHICS_SIZE_9"/>
            <visualProperty default="E,W,c,0.00,0.00" name="NODE_LABEL_POSITION"/>
            <visualProperty default="50.0" name="NODE_CUSTOMGRAPHICS_SIZE_5"/>
            <visualProperty default="org.cytoscape.ding.customgraphics.NullCustomGraphics,0,[ Remove Graphics ]," name="NODE_CUSTOMGRAPHICS_8"/>
            <visualProperty default="C,C,c,0.00,0.00" name="NODE_CUSTOMGRAPHICS_POSITION_3"/>
            <visualProperty default="true" name="NODE_NESTED_NETWORK_IMAGE_VISIBLE"/>
            <visualProperty default="50.0" name="NODE_CUSTOMGRAPHICS_SIZE_8"/>
            <visualProperty default="50.0" name="NODE_CUSTOMGRAPHICS_SIZE_4"/>
            <visualProperty default="true" name="NODE_VISIBLE"/>
            <visualProperty default="#1E90FF" name="NODE_PAINT"/>
            <visualProperty default="org.cytoscape.ding.customgraphics.NullCustomGraphics,0,[ Remove Graphics ]," name="NODE_CUSTOMGRAPHICS_3"/>
            <visualProperty default="C,C,c,0.00,0.00" name="NODE_CUSTOMGRAPHICS_POSITION_7"/>
            <visualProperty default="SOLID" name="NODE_BORDER_STROKE"/>
            <visualProperty default="50.0" name="NODE_CUSTOMGRAPHICS_SIZE_2"/>
            <visualProperty default="org.cytoscape.ding.customgraphics.NullCustomGraphics,0,[ Remove Graphics ]," name="NODE_CUSTOMGRAPHICS_7"/>
            <visualProperty default="10.0" name="NODE_SIZE">
                <continuousMapping attributeName="#GeneInGOAndHitList" attributeType="float">
                    <continuousMappingPoint attrValue="5.0" equalValue="10.0" greaterValue="10.0" lesserValue="10.0"/>
                    <continuousMappingPoint attrValue="20.0" equalValue="30.0" greaterValue="30.0" lesserValue="30.0"/>
                </continuousMapping>
            </visualProperty>
            <visualProperty default="false" name="NODE_SELECTED"/>
            <visualProperty default="50.0" name="NODE_CUSTOMGRAPHICS_SIZE_3"/>
            <visualProperty default="30.0" name="NODE_HEIGHT"/>
            <visualProperty default="DefaultVisualizableVisualProperty(id=NODE_CUSTOMPAINT_4, name=Node Custom Paint 4)" name="NODE_CUSTOMPAINT_4"/>
            <visualProperty default="C,C,c,0.00,0.00" name="NODE_CUSTOMGRAPHICS_POSITION_4"/>
            <visualProperty default="DefaultVisualizableVisualProperty(id=NODE_CUSTOMPAINT_3, name=Node Custom Paint 3)" name="NODE_CUSTOMPAINT_3"/>
            <visualProperty default="ROUND_RECTANGLE" name="COMPOUND_NODE_SHAPE"/>
            <visualProperty default="10.0" name="COMPOUND_NODE_PADDING"/>
            <visualProperty default="org.cytoscape.ding.customgraphics.NullCustomGraphics,0,[ Remove Graphics ]," name="NODE_CUSTOMGRAPHICS_4"/>
            <visualProperty default="#0099CC" name="NODE_FILL_COLOR">
                <discreteMapping attributeName="GROUP_ID" attributeType="float">
                    <discreteMappingEntry attributeValue="0.0" value="#BCBDDC"/>
                    <discreteMappingEntry attributeValue="2.0" value="#377EB8"/>
                    <discreteMappingEntry attributeValue="8.0" value="#F781BF"/>
                    <discreteMappingEntry attributeValue="9.0" value="#999999"/>
                    <discreteMappingEntry attributeValue="10.0" value="#8DD3C7"/>
                    <discreteMappingEntry attributeValue="11.0" value="#FFFFB3"/>
                    <discreteMappingEntry attributeValue="3.0" value="#4DAF4A"/>
                    <discreteMappingEntry attributeValue="12.0" value="#BEBADA"/>
                    <discreteMappingEntry attributeValue="13.0" value="#FB8072"/>
                    <discreteMappingEntry attributeValue="14.0" value="#80B1D3"/>
                    <discreteMappingEntry attributeValue="15.0" value="#FDB462"/>
                    <discreteMappingEntry attributeValue="1.0" value="#E41A1C"/>
                    <discreteMappingEntry attributeValue="4.0" value="#984EA3"/>
                    <discreteMappingEntry attributeValue="16.0" value="#B3DE69"/>
                    <discreteMappingEntry attributeValue="17.0" value="#FCCDE5"/>
                    <discreteMappingEntry attributeValue="18.0" value="#D9D9D9"/>
                    <discreteMappingEntry attributeValue="19.0" value="#BC80BD"/>
                    <discreteMappingEntry attributeValue="5.0" value="#FF7F00"/>
                    <discreteMappingEntry attributeValue="20.0" value="#CCEBC5"/>
                    <discreteMappingEntry attributeValue="6.0" value="#FFFF33"/>
                    <discreteMappingEntry attributeValue="7.0" value="#A65628"/>
                </discreteMapping>
            </visualProperty>
            <visualProperty default="C,C,c,0.00,0.00" name="NODE_CUSTOMGRAPHICS_POSITION_9"/>
            <visualProperty default="DefaultVisualizableVisualProperty(id=NODE_CUSTOMPAINT_5, name=Node Custom Paint 5)" name="NODE_CUSTOMPAINT_5"/>
            <visualProperty default="Dialog.plain,plain,12" name="NODE_LABEL_FONT_FACE"/>
            <visualProperty default="50.0" name="NODE_CUSTOMGRAPHICS_SIZE_6"/>
            <visualProperty default="org.cytoscape.ding.customgraphics.NullCustomGraphics,0,[ Remove Graphics ]," name="NODE_CUSTOMGRAPHICS_5"/>
            <visualProperty default="C,C,c,0.00,0.00" name="NODE_CUSTOMGRAPHICS_POSITION_1"/>
            <visualProperty default="0.0" name="NODE_Z_LOCATION"/>
            <visualProperty default="0.0" name="NODE_X_LOCATION"/>
            <visualProperty default="ELLIPSE" name="NODE_SHAPE"/>
            <visualProperty default="org.cytoscape.ding.customgraphics.NullCustomGraphics,0,[ Remove Graphics ]," name="NODE_CUSTOMGRAPHICS_6"/>
            <visualProperty default="DefaultVisualizableVisualProperty(id=NODE_CUSTOMPAINT_2, name=Node Custom Paint 2)" name="NODE_CUSTOMPAINT_2"/>
            <visualProperty default="C,C,c,0.00,0.00" name="NODE_CUSTOMGRAPHICS_POSITION_8"/>
            <visualProperty default="C,C,c,0.00,0.00" name="NODE_CUSTOMGRAPHICS_POSITION_5"/>
            <visualProperty default="C,C,c,0.00,0.00" name="NODE_CUSTOMGRAPHICS_POSITION_6"/>
            <visualProperty default="" name="NODE_TOOLTIP">
                <passthroughMapping attributeName="Description" attributeType="string"/>
            </visualProperty>
            <visualProperty default="#000000" name="NODE_LABEL_COLOR"/>
            <visualProperty default="0.0" name="NODE_Y_LOCATION"/>
            <visualProperty default="#FFFF00" name="NODE_SELECTED_PAINT"/>
            <visualProperty default="255" name="NODE_LABEL_TRANSPARENCY"/>
            <visualProperty default="#006699" name="NODE_BORDER_PAINT"/>
            <visualProperty default="C,C,c,0.00,0.00" name="NODE_CUSTOMGRAPHICS_POSITION_2"/>
            <visualProperty default="DefaultVisualizableVisualProperty(id=NODE_CUSTOMPAINT_7, name=Node Custom Paint 7)" name="NODE_CUSTOMPAINT_7"/>
            <visualProperty default="200.0" name="NODE_LABEL_WIDTH"/>
            <visualProperty default="org.cytoscape.ding.customgraphics.NullCustomGraphics,0,[ Remove Graphics ]," name="NODE_CUSTOMGRAPHICS_1"/>
            <visualProperty default="255" name="NODE_TRANSPARENCY"/>
            <visualProperty default="org.cytoscape.ding.customgraphics.NullCustomGraphics,0,[ Remove Graphics ]," name="NODE_CUSTOMGRAPHICS_9"/>
            <visualProperty default="50.0" name="NODE_CUSTOMGRAPHICS_SIZE_7"/>
        </node>
        <edge>
            <dependency value="false" name="arrowColorMatchesEdge"/>
            <visualProperty default="#000000" name="EDGE_SOURCE_ARROW_UNSELECTED_PAINT"/>
            <visualProperty default="#404040" name="EDGE_UNSELECTED_PAINT"/>
            <visualProperty default="#323232" name="EDGE_PAINT"/>
            <visualProperty default="" name="EDGE_TOOLTIP"/>
            <visualProperty default="#FFFF00" name="EDGE_SOURCE_ARROW_SELECTED_PAINT"/>
            <visualProperty default="100" name="EDGE_TRANSPARENCY"/>
            <visualProperty default="NONE" name="EDGE_TARGET_ARROW_SHAPE"/>
            <visualProperty default="SOLID" name="EDGE_LINE_TYPE"/>
            <visualProperty default="10" name="EDGE_LABEL_FONT_SIZE"/>
            <visualProperty default="3.0" name="EDGE_WIDTH">
                <continuousMapping attributeName="SCORE" attributeType="float">
                    <continuousMappingPoint attrValue="0.3" equalValue="2.0" greaterValue="2.0" lesserValue="2.0"/>
                    <continuousMappingPoint attrValue="1.0" equalValue="5.0" greaterValue="5.0" lesserValue="5.0"/>
                </continuousMapping>
            </visualProperty>
            <visualProperty default="true" name="EDGE_VISIBLE"/>
            <visualProperty default="255" name="EDGE_LABEL_TRANSPARENCY"/>
            <visualProperty default="Dialog.plain,plain,10" name="EDGE_LABEL_FONT_FACE"/>
            <visualProperty default="#54278F" name="EDGE_STROKE_UNSELECTED_PAINT"/>
            <visualProperty default="" name="EDGE_BEND">
                <discreteMapping attributeName="BEND_MAP_ID" attributeType="long">
                    <discreteMappingEntry attributeValue="3429364" value="0.9991651303675204,-0.04085391361492718,0.3652931844904641|0.9908130348882752,-0.13523878842804504,0.4718989846706778|0.9986954044163208,0.051063579954029034,0.6143571838909891"/>
                    <discreteMappingEntry attributeValue="3429365" value="0.7642448471115835,-0.6449262079210244,0.35887240335938336|0.8858870969154372,-0.46390090700357417,0.6633162901388165|0.8358334816616121,-0.5489830515903269,0.8258053106652828"/>
                    <discreteMappingEntry attributeValue="3429366" value="0.8700204622614682,0.4930156135928569,0.29164987138949844|0.9868538289899389,0.1616153464492046,0.3890281654445406|0.9770992946184942,0.21278385384244045,0.6093877989522216"/>
                    <discreteMappingEntry attributeValue="3429367" value="0.09214817021997775,-0.9957453061526879,0.3118005212188116|0.42897271414301735,-0.9033174472580352,0.4950826801545072|0.8073303635626841,-0.590099723834662,0.6153105708487672"/>
                    <discreteMappingEntry attributeValue="3429360" value="0.4917290067974492,0.8707482896187589,0.26524327086299965|0.7434195750434367,0.6688253400120512,0.4911934399028792|0.8871436522872346,0.4614933804579067,0.688534020152142"/>
                    <discreteMappingEntry attributeValue="3429361" value="0.9957304848911618,0.09230818738558264,0.14337908249056674|0.9979531697163118,-0.06394897226043789,0.49200074402078975|0.9992568780915319,-0.03854467001759711,0.7582735466416851"/>
                    <discreteMappingEntry attributeValue="3429362" value="0.30168667968572427,0.9534071256814705,0.8043675691409918|0.7126415009067713,0.7015283965637773,0.9831440356927292|0.909951021010693,0.4147157331975691,1.0059104968186523"/>
                    <discreteMappingEntry attributeValue="3429363" value="0.4014754688095401,-0.915869776739117,0.10908247824489294|0.8240527408546866,-0.5665130892484999,0.31523937978936356|0.9514373509006994,-0.30784243910003617,0.5429688951147708"/>
                    <discreteMappingEntry attributeValue="3429372" value="-0.026908859711786668,0.9996378910730682,0.48025301837969214|0.7611415702896861,0.648585776884562,0.44767191569299125|0.9985470859303364,-0.05388615016897611,0.8292974888044095"/>
                    <discreteMappingEntry attributeValue="3429373" value="-0.82549548037025,0.5644087276861425,0.38523324352726196|-0.07585848806193234,0.9971185936431822,0.3619463112754724|0.6512636376435337,0.7588515495690261,0.652787684692728"/>
                    <discreteMappingEntry attributeValue="3429374" value="-0.5003705383920243,0.8658113676253482,0.024041445787739063|0.0851659100056436,0.9963667837563186,0.10687512323537447|0.9548123855935851,0.2972091995835376,0.18656977747946146"/>
                    <discreteMappingEntry attributeValue="3429375" value="0.587113055054701,0.8095049478442585,0.1959220809511577|0.852287806184544,0.5230731262731217,0.380704334932654|0.9451759348429283,0.3265615595776646,0.6480841195590716"/>
                    <discreteMappingEntry attributeValue="3429368" value="0.9987242696751981,-0.050495872719878265,0.2563221732910506|0.9791168957342893,-0.20329806808636644,0.42197359666698925|0.9887135297210542,-0.14981841057271328,0.6259615474884327"/>
                    <discreteMappingEntry attributeValue="3429369" value="0.9990384293410212,0.0438430918141669,0.12196945885113045|0.9870155597488214,0.16062467062603059,0.7244183761917549|0.9993918897883839,0.034869049674499955,1.1349564043167786"/>
                    <discreteMappingEntry attributeValue="3429370" value="0.4562533192478502,0.8898499360427685,0.3128374994370049|0.9953979287570752,0.0958277800333734,0.29730028191780905|0.9990389615964096,0.043830961800622646,0.6089081661938018"/>
                    <discreteMappingEntry attributeValue="3429371" value="0.9979962710838326,-0.06327276588521573,0.49102928210059005|0.97485597930235,0.2228358580176362,0.636905760504962|0.9490306678926675,-0.31518374228249363,0.6420704026417791"/>
                    <discreteMappingEntry attributeValue="3429356" value="0.9999999999999999,1.4901161193847656E-8,0.25|0.9999999999999999,1.4901161193847656E-8,0.5|0.9999999999999999,1.4901161193847656E-8,0.75"/>
                    <discreteMappingEntry attributeValue="3429357" value="0.12870956430268163,-0.9916823322299404,0.31491990658297714|0.24478905180215504,-0.9695763611587289,0.4479405706289206|0.8781363686318227,-0.478410407585491,0.3604590072461889"/>
                    <discreteMappingEntry attributeValue="3429358" value="-0.996399678394752,0.08478019164188556,0.17817547422274377|0.5929646579364225,0.8052284858587291,0.36479010408146795|0.9256927076883368,0.37827636845649704,0.6449378299470178"/>
                    <discreteMappingEntry attributeValue="3429359" value="0.8045110725627511,0.5939376517143291,0.5511548202550592|0.5301127792019269,0.8479271438790064,0.7882358009508103|0.7842314220403854,0.620468433269989,0.8901051642285202"/>
                    <discreteMappingEntry attributeValue="3429354" value="0.21010335734352337,0.9776791801163507,0.2524633565087802|0.8473673234539085,0.5310071742853943,0.26563207443632336|0.9141445039692959,0.40538848758040713,0.5117974110205549"/>
                    <discreteMappingEntry attributeValue="3429355" value="0.9290379701157704,0.3699843916750664,0.13048213867727648|0.9962668334743022,-0.0863272640542196,0.30509444453963425|0.9890007453720799,0.14791053259815645,0.48961050859521793"/>
                    <discreteMappingEntry attributeValue="3429428" value="0.700647359248224,-0.7135077280439857,0.4390082339292744|0.7754295359846157,-0.6314341095654269,0.629941397307768|0.9867133713115545,-0.1624706831246378,0.9834992213138761"/>
                    <discreteMappingEntry attributeValue="3429429" value="0.890601718839878,-0.4547841008648552,0.2429782950545884|0.9399836761513499,-0.341219414115015,0.33302014073311714|0.9797955481886057,0.20000170936716927,0.5424310801886589"/>
                    <discreteMappingEntry attributeValue="3429430" value="0.9773872928633085,-0.21145703996162724,0.3142749938659547|0.994478800781229,0.10493767100869311,0.4049781147498951|0.9924239384889241,-0.12286059707706229,0.6743143362986481"/>
                    <discreteMappingEntry attributeValue="3429431" value="0.9608934570438197,0.2769183349118961,0.2720743985817198|0.9970623743053375,0.0765938753726631,0.4740281014635791|0.9987807574731351,0.0493659650102221,0.7550923522695542"/>
                    <discreteMappingEntry attributeValue="3429424" value="0.8937375220745397,-0.4485902825921017,0.5200532166924186|0.9692352697965713,-0.24613612449692895,0.9624842466734087|0.9384655792316431,-0.3453727791784069,1.2146676617741397"/>
                    <discreteMappingEntry attributeValue="3429425" value="0.9801237515253755,0.19838707542535144,0.36163313165474603|0.9958704022503774,-0.09078624301991775,0.4594000919655378|0.998857949787873,-0.04777861598630665,0.7316919276138731"/>
                    <discreteMappingEntry attributeValue="3429426" value="0.21504140222764265,0.97660493308603,0.5755436135157693|0.6418990139572074,0.7667891860744809,0.975438306173472|0.9584433549714069,0.28528290399383166,0.6721609694296913"/>
                    <discreteMappingEntry attributeValue="3429427" value="0.9827700333580348,-0.1848325229321051,0.3346045495063242|0.9553964582338073,-0.2953262731188964,0.5667971578648215|0.9693433553188101,-0.24571011273301524,0.8186997872159023"/>
                    <discreteMappingEntry attributeValue="3429436" value="0.9724109161846304,0.2332745380125481,0.3073327538626806|0.9798365740866153,0.19980062082537398,0.595020909454367|0.9902321543407095,0.13942840639466975,0.9133311660179513"/>
                    <discreteMappingEntry attributeValue="3429437" value="0.9606943729374496,-0.27760821638834904,0.1508288559175432|0.5420259164268975,-0.840361770859183,0.6022345624774413|0.8823537604663039,-0.4705866991224597,0.8211381675313496"/>
                    <discreteMappingEntry attributeValue="3429438" value="0.6246889542323695,-0.7808736840616852,0.5977228396519657|0.8111650871474199,-0.5848172375991655,0.8359079747089625|0.9441840682323864,-0.32941834389745245,0.8048996819576171"/>
                    <discreteMappingEntry attributeValue="3429439" value="1.0,0.0,0.25|1.0,0.0,0.5|1.0,0.0,0.7499999999999999"/>
                    <discreteMappingEntry attributeValue="3429432" value="0.6578655336672693,-0.7531354058950349,0.27862947872734833|0.7193710165133997,-0.6946260437101952,0.38397086690876836|0.9794190653808851,-0.20183729677250822,0.5905246294499524"/>
                    <discreteMappingEntry attributeValue="3429433" value="0.6893112849077765,0.7244652872973212,0.3376148479237383|0.8254343307130172,0.5644981538325465,0.1723113169741794|0.8480809315591001,0.529866712981528,0.45869703044242083"/>
                    <discreteMappingEntry attributeValue="3429434" value="0.9263240953473886,0.3767275811230738,0.35607145597208706|0.7666087516722632,0.6421144927966463,0.4784840383389728|0.9930616176339693,0.1175951681924228,0.4681856673039151"/>
                    <discreteMappingEntry attributeValue="3429435" value="0.9938033016095815,0.11115303733994468,0.23581806121512033|0.9149573700007162,0.40355050623357236,0.30248719981538785|0.975045232372124,0.22200629456929963,0.5278013267139033"/>
                    <discreteMappingEntry attributeValue="3429412" value="0.8708015663054408,0.49163465309108445,0.5200955251114556|0.9384411575366663,0.3454391318904704,0.8518314761829308|0.9921904693831514,0.1247320025704782,0.9445013814170378"/>
                    <discreteMappingEntry attributeValue="3429413" value="0.9939132323613113,0.11016572305889848,0.5183727286144382|0.9734270000133296,0.2289975450633679,0.796472289163725|0.9962147061416049,0.086926746558213,0.9484107130377671"/>
                    <discreteMappingEntry attributeValue="3429414" value="0.9583777121692071,0.2855033464205218,0.5608331124777284|0.9495554596754445,0.31359915337984456,1.0021053300552372|0.9942757109002728,0.10684479731721702,1.025749337018271"/>
                    <discreteMappingEntry attributeValue="3429415" value="0.6538946839702994,0.7565855815936372,0.739399060625927|0.8417622206178702,0.539848463867845,1.0008044308045898|0.9821457180243955,0.18812173868626805,1.0259716815648805"/>
                    <discreteMappingEntry attributeValue="3429408" value="0.8296609543157767,-0.5582675889605582,0.16410630010464378|0.9632437715933616,-0.2686288079983154,0.4269200631285704|0.9873644270203331,0.15846604764052546,0.5969217783322113"/>
                    <discreteMappingEntry attributeValue="3429409" value="0.8623052445232904,0.5063888478902635,0.3023335189575419|0.968386336547747,0.24945521278905705,0.4980327215319228|0.9956002895708858,0.09370199254214626,0.6378044609231313"/>
                    <discreteMappingEntry attributeValue="3429410" value="0.9932600043381663,-0.11590756568121797,0.37020766016933077|0.9446762378518805,-0.3280042768593381,0.5266791042065153|0.9751387985247256,-0.2215949539401892,0.6645955783591808"/>
                    <discreteMappingEntry attributeValue="3429411" value="0.9997738349724183,0.02126684989704912,0.4336634918143689|0.999828594766054,-0.01851434816939959,0.7999698012219971|0.9989335477669251,-0.04617106394468668,0.9347287482275888"/>
                    <discreteMappingEntry attributeValue="3429420" value="1.0,0.0,0.25|1.0,0.0,0.5|1.0,0.0,0.7499999999999999"/>
                    <discreteMappingEntry attributeValue="3429421" value="0.7076717782522043,0.706541332312104,0.5826768741822604|0.7790454390065286,0.6269674664311738,0.892394777689225|0.9077380474641483,0.41953740856564337,0.9330327936871284"/>
                    <discreteMappingEntry attributeValue="3429422" value="0.2633325147446487,-0.9647051293935672,0.16091864218255328|0.7855992755659158,-0.6187356287060801,0.4642174788545524|0.9194842719630691,-0.3931267907590943,0.7982467475463105"/>
                    <discreteMappingEntry attributeValue="3429423" value="0.9676794621563172,-0.2521833827215043,0.4292364499451425|0.9993715747196293,0.03544651805760771,0.5815294005559482|0.9919232061539748,-0.12683987185904616,0.7738565117668977"/>
                    <discreteMappingEntry attributeValue="3429416" value="0.6817570129043447,0.7315786870567959,0.3948112014310803|-0.4800071517195881,-0.8772645748564387,0.24667225992658853|0.7537933403177467,-0.6571115583313184,0.6147365964928266"/>
                    <discreteMappingEntry attributeValue="3429417" value="-0.6352231109150478,0.772328686091232,0.20402568745326308|0.0320513454615526,0.9994862236439801,0.809290233375148|0.739606470608415,0.6730395743447511,0.6575739307095909"/>
                    <discreteMappingEntry attributeValue="3429418" value="0.9734517611907362,0.22889226425253859,0.4945638039744329|0.8292649201099193,0.5588556989734373,0.7170875998151243|0.9607285092942744,0.27749005645103975,0.8090128771524341"/>
                    <discreteMappingEntry attributeValue="3429419" value="0.7529091897044584,0.6581244198922995,0.28102703285304054|0.9085415456319694,0.4177945187058729,0.4975536124080845|0.9862078651069747,0.1655114703008322,0.7290583281182831"/>
                    <discreteMappingEntry attributeValue="3429396" value="0.7714670415373243,-0.6362692856186352,0.552486757990597|0.9545319907068196,-0.29810850158503704,0.7932258635411664|0.9901404906166779,-0.14007786706458827,0.9739801949692415"/>
                    <discreteMappingEntry attributeValue="3429397" value="0.970683442798642,-0.24036150664483574,0.5084174606740129|0.9699174288560908,-0.24343414140417954,0.8600055417220971|0.9778451905878303,-0.20932936546086867,1.0640695648812266"/>
                    <discreteMappingEntry attributeValue="3429398" value="0.9627263230625751,-0.2704774054933503,0.4317323698548064|0.9973528120203097,-0.07271429264718754,0.7070901109731077|0.9999906654468435,0.004320766040786462,0.91236829009707"/>
                    <discreteMappingEntry attributeValue="3429399" value="0.9861525427595518,-0.165840774265168,0.43398646866889273|0.9839905059071615,-0.17822088621867055,0.721280978540142|0.9959198296021443,-0.09024241245243744,0.9178285663849814"/>
                    <discreteMappingEntry attributeValue="3429392" value="0.9119332444699144,-0.4103385890098265,0.29231993772773646|0.7351586943903001,-0.6778950464949197,0.5182069735065772|0.8560654162120297,-0.5168674909159255,0.7365602276774151"/>
                    <discreteMappingEntry attributeValue="3429393" value="0.9755444727100692,0.21980214231174616,0.3839577881338276|0.9681970742381977,0.25018877959771485,0.6802201082524202|0.9998635027198454,-0.016521983198205362,0.8436080860361342"/>
                    <discreteMappingEntry attributeValue="3429394" value="0.9321147740024787,0.3621630131395366,0.5834118770541294|0.992229617994849,0.12442019600449136,0.28617725285809653|0.9941654302946279,0.10786610777763962,0.7645738012653338"/>
                    <discreteMappingEntry attributeValue="3429395" value="0.8094300213166286,0.5872163490497878,0.13206498781505924|0.9949239005060325,-0.10063017540411176,0.5549099634576259|0.9915555284225572,-0.12968282096971556,0.8701529546077722"/>
                    <discreteMappingEntry attributeValue="3429404" value="0.9850929121580662,0.17202312174803872,0.3431199814798542|0.9927238883238038,0.12041296255498408,0.6964033904489695|0.9977312515033546,0.06732272850642439,0.9030025026907417"/>
                    <discreteMappingEntry attributeValue="3429405" value="0.9999999999999998,2.1073424255447017E-8,0.25|0.9999999999999998,2.1073424255447017E-8,0.5|1.0,0.0,0.7499999999999999"/>
                    <discreteMappingEntry attributeValue="3429406" value="0.9991519407639586,0.04117522638207221,0.1641353866393152|0.9991272483906498,0.041770103223822054,0.42308790676381486|0.9999394060928873,0.011008366936278137,0.5963054351650773"/>
                    <discreteMappingEntry attributeValue="3429407" value="0.7386864207807282,0.6740492354080353,0.3918318518285836|0.838714916357893,0.5445707383607502,0.5749683321751698|0.9602839621714089,0.27902457238813244,0.6272252760705458"/>
                    <discreteMappingEntry attributeValue="3429400" value="0.5925272788355532,0.8055503856592302,0.2570228578879774|0.7684533236966659,0.6399058440892279,0.6677742659884268|0.9763833190655965,0.21604539858661553,0.9039722373522937"/>
                    <discreteMappingEntry attributeValue="3429401" value="0.9552484432242626,-0.29580468508396335,0.3957869224311277|0.9656787588171802,-0.25973935929949127,0.8573634944747657|0.9848656889499875,-0.17331928550818135,0.9745904368443818"/>
                    <discreteMappingEntry attributeValue="3429402" value="0.7028044768199533,-0.7113830665413899,0.44874969344256377|0.7822249438949787,-0.6229960972177093,0.656784470984439|0.9014660718766545,-0.4328497675351973,0.765657478053624"/>
                    <discreteMappingEntry attributeValue="3429403" value="0.8464037969794999,-0.532541653261682,0.16455069295137154|0.774891243404981,-0.6320945822377237,0.3935937554109314|0.9101231999099558,-0.41433773782466715,0.5798861016131912"/>
                    <discreteMappingEntry attributeValue="3429380" value="0.9817316313922877,0.19027086987722888,0.46939036039208765|0.9729242511590652,0.2311242122897819,0.6826382762840092|0.9983284832162155,0.057794805988173104,0.8601496492359646"/>
                    <discreteMappingEntry attributeValue="3429381" value="0.8560594111780819,0.5168774366650528,0.19955073853408845|0.9968786952488838,0.07894850827522316,0.35658512950816074|0.9999268800714851,0.012092746193724026,0.6763115387798387"/>
                    <discreteMappingEntry attributeValue="3429382" value="1.0,0.0,0.25|1.0,0.0,0.5|1.0,0.0,0.75"/>
                    <discreteMappingEntry attributeValue="3429383" value="0.960426327748855,-0.2785341432694546,0.39644150959748664|0.9776779707934325,-0.21010898463710695,0.5656903199259952|0.9984379822415854,-0.05587124141588012,0.812628157612348"/>
                    <discreteMappingEntry attributeValue="3429376" value="-0.43410688586424856,0.9008613720463567,0.3111893405138945|0.4356018233383298,0.9001394622525569,0.2863800667175858|0.9444984977746256,0.32851573432862485,0.524571942630102"/>
                    <discreteMappingEntry attributeValue="3429377" value="0.9996279918665636,0.027274124675623835,0.342822457252772|0.9279960388826489,-0.37259005866785166,0.6103378664045063|0.98892114067078,-0.14844183215793122,0.8729589886456318"/>
                    <discreteMappingEntry attributeValue="3429378" value="0.9999813277010413,0.006110994130469165,0.010913041513572488|0.9998536037729895,0.01711055294739905,0.4078398433189317|0.9999999797127418,2.01431169389941E-4,0.7378440433457883"/>
                    <discreteMappingEntry attributeValue="3429379" value="0.8856616173017937,0.4643312391368592,0.4068707420356805|0.8668470026655226,0.4985742411815911,0.5579030561651643|0.9384158531242932,0.3455078676455935,0.703716186785628"/>
                    <discreteMappingEntry attributeValue="3429388" value="0.993350426228853,-0.11513005997981667,0.4799992004967299|0.9906569387050512,-0.13637752672466377,0.8953187943951757|0.9854219440478114,-0.1701281640088793,1.042509674409124"/>
                    <discreteMappingEntry attributeValue="3429389" value="0.9950595990669439,-0.09927937502186919,0.204765690136896|0.8644621326692937,-0.5026979422882656,0.3748127132008515|0.9693521913384961,-0.2456752513934921,0.6341796736734271"/>
                    <discreteMappingEntry attributeValue="3429390" value="0.9884710539358506,0.1514099584933198,0.16862321893394955|0.9686838738127996,-0.24829730690248752,0.330771973507447|0.999939728790689,0.010979015711949973,0.5537388931724314"/>
                    <discreteMappingEntry attributeValue="3429391" value="0.8962615464111908,-0.4435259185488722,0.1933699953916014|0.6618759237369674,-0.7496134080826837,0.33918984233851757|0.9730959454328099,-0.23040026254808377,0.5704976321039593"/>
                    <discreteMappingEntry attributeValue="3429384" value="0.7167342648814264,-0.6973463942294972,0.4794371288470156|0.7595108022242152,-0.6504946896821903,0.6921728444714246|0.8982343173733175,-0.43951690649267444,0.8072541624050447"/>
                    <discreteMappingEntry attributeValue="3429385" value="0.9006697041390856,0.43450441199832707,0.25917399750787945|0.9977431244995696,0.06714653761614503,0.4921511311317006|0.9705740104249644,0.2408030113756909,0.6972387553134494"/>
                    <discreteMappingEntry attributeValue="3429386" value="0.859768492269508,-0.5106839920152353,0.3742966255492246|0.9178289059144291,-0.39697619508973336,0.5258577858643295|0.9557547649547116,-0.29416462952973127,0.7729566998447533"/>
                    <discreteMappingEntry attributeValue="3429387" value="0.9985719280146834,0.05342382035232895,0.34830447081085175|0.985742979275396,0.16825807204786997,0.47817739391315345|0.9998716739309191,-0.016019852389511036,0.6613399899048533"/>
                    <discreteMappingEntry attributeValue="3429492" value="0.999534856107977,0.03049707240385113,0.1478995648715928|0.9714162567582473,-0.2373825101093065,0.5203676774512944|0.9693561811766795,-0.2456595082926049,0.8181192909888689"/>
                    <discreteMappingEntry attributeValue="3429493" value="0.82018234507237,-0.5721021943950118,0.31625867554051856|0.9637338819897091,-0.2668651432934722,0.6150457307244069|0.9536742779441207,-0.30084110687829874,0.7465648074598015"/>
                    <discreteMappingEntry attributeValue="3429494" value="0.9175496353932409,0.3976212602335679,0.2620228334719293|0.970553554000254,0.24088544750041677,0.5024266246579313|0.9926909404837883,0.12068428514687389,0.7405550599435874"/>
                    <discreteMappingEntry attributeValue="3429495" value="0.9898508817394578,0.14210992899730107,0.275436830612584|0.9766114444407039,0.215011828947716,0.4372385514623416|0.9999526907915093,0.009727084805851757,0.67786078632273"/>
                    <discreteMappingEntry attributeValue="3429488" value="0.9930849605880631,0.11739787499697446,0.5783104494133623|0.9937057317770382,0.11202195603300684,0.9987322438022355|0.9922890458041584,0.12394534915466876,0.9917852425821038"/>
                    <discreteMappingEntry attributeValue="3429489" value="0.9723761169195781,0.23341955197541375,0.4233167074861866|0.9864720833363411,0.16392934086995828,0.7716938396713073|0.9999974815526398,0.0022443013117328017,0.8884955975952716"/>
                    <discreteMappingEntry attributeValue="3429490" value="0.9499037217737653,0.3125426680636568,0.30421089609799745|0.9700665822873465,0.2428390947301252,0.5727208333616935|0.9929232801293588,0.1187575672416492,0.8047216708275775"/>
                    <discreteMappingEntry attributeValue="3429491" value="0.9880745960152043,0.1539759484769969,0.5002298485436684|0.9815889982279664,0.19100533646423953,0.743576856461117|0.9686310450281798,0.24850331709580137,0.8804816153243319"/>
                    <discreteMappingEntry attributeValue="3429500" value="0.9762515249565992,-0.2166401625274377,0.45776722042331935|0.9921218542691241,-0.12527659909813488,0.7809211457802513|0.9975022038010541,-0.07063535525528447,0.9593303478659697"/>
                    <discreteMappingEntry attributeValue="3429501" value="0.8605493836327478,-0.5093670173159014,0.5211972977371687|0.8785812058192972,-0.4775929907160591,0.7687061057763039|0.9122260925590322,-0.4096871441166784,0.9049403470509055"/>
                    <discreteMappingEntry attributeValue="3429502" value="0.12990077496524563,-0.9915269984541161,0.058147026122013216|0.7933587278855724,-0.6087544076947503,0.36047162225728174|0.9577282062666297,-0.2876746129245749,0.8065747698382859"/>
                    <discreteMappingEntry attributeValue="3429503" value="0.3822905960608019,-0.9240421528066113,0.3062319057210505|0.7749696071525295,-0.6319985031547575,0.4907308204921811|0.9603569191191602,-0.27877336296704314,0.8060379742360387"/>
                    <discreteMappingEntry attributeValue="3429496" value="0.5535955033750037,0.8327856979097181,0.5049843892495774|0.6429944647772752,0.7658708234851263,0.6858539352059656|0.9006726518437717,0.43449830174663295,0.7635389691697494"/>
                    <discreteMappingEntry attributeValue="3429497" value="0.9668940097461503,0.25517831788185197,0.22938181738106928|0.9140433199768319,-0.4056165790567873,0.3988303500624346|0.879833468853441,-0.47528209211511535,0.597478415106854"/>
                    <discreteMappingEntry attributeValue="3429498" value="0.9102574242850721,0.41404277742028817,0.3043712920429637|0.9133140739598731,0.40725594201536147,0.5117576837544264|0.981815729704308,0.18983643724321544,0.7056577220638407"/>
                    <discreteMappingEntry attributeValue="3429499" value="0.9838690068484827,-0.17889040601155887,0.2493881488102887|0.9711137948461503,-0.23861684236346145,0.4603493252444893|0.988728439981887,-0.149719978529868,0.7094839876510016"/>
                    <discreteMappingEntry attributeValue="3429476" value="0.9818253298619133,0.18978677941717953,0.3292364125632074|0.9714900114758048,0.23708048760440115,0.5627393822857011|0.9543443396114439,0.2987086899499192,0.7383682636458969"/>
                    <discreteMappingEntry attributeValue="3429477" value="0.9610962269002586,-0.2762137625790695,0.29248670368089275|0.9662610252205368,-0.2575648095912117,0.49982992555457023|0.985181560377025,-0.17151470226511278,0.6699596180412322"/>
                    <discreteMappingEntry attributeValue="3429478" value="0.8784046087201368,-0.47791771611776784,0.3732895826046933|0.9134783177405453,-0.40688740828133685,0.6175818487528187|0.9470488275487607,-0.32108957977255764,0.8239773357265672"/>
                    <discreteMappingEntry attributeValue="3429479" value="0.8732069550852661,0.4873495804766,0.3545554736854538|0.8617165394460227,0.5073899936391841,0.6041526724831738|0.9066519822637396,0.4218793465639574,0.6856258827472034"/>
                    <discreteMappingEntry attributeValue="3429472" value="0.9521727970456926,0.305560083397983,0.22710240538780938|0.9777086700886106,0.20996608400777578,0.4574251134599442|0.9753015211314839,0.22087766496097697,0.6079477025512376"/>
                    <discreteMappingEntry attributeValue="3429473" value="0.9626929324013638,0.27059622670034267,0.42846150026362756|0.9894874404870033,0.14461882698486758,0.6613653539064995|0.9946519832499622,0.10328326203658053,0.8346286595594496"/>
                    <discreteMappingEntry attributeValue="3429474" value="0.8030554019543736,-0.5959043726907023,0.37251332599252496|0.9121935459334604,-0.40975960605864986,0.5034882166519676|0.9729694308014982,-0.2309339445075335,0.7246720645105397"/>
                    <discreteMappingEntry attributeValue="3429475" value="0.999993129604027,0.0037068510549667054,0.38799001987708304|0.999394579778001,-0.03479186557735733,0.5161633424004974|0.9963984204839288,-0.08479497424453782,0.6943438760447612"/>
                    <discreteMappingEntry attributeValue="3429484" value="0.6892693925923986,0.7245051445195582,0.5191301440428479|0.8457535778991512,0.5335736926337209,0.48846339818257156|0.9797800167489589,0.20007778182349453,0.6348654099511026"/>
                    <discreteMappingEntry attributeValue="3429485" value="0.9637921546831468,0.2666546128819398,0.5795622748842922|0.9435428973197085,0.3312503598753214,0.9058737717133346|0.9956896845670603,0.09274724818962528,0.8860185506753435"/>
                    <discreteMappingEntry attributeValue="3429486" value="1.0,0.0,0.25|1.0,0.0,0.5|1.0,0.0,0.75"/>
                    <discreteMappingEntry attributeValue="3429487" value="0.5986435320312947,-0.801015556376464,0.34249272063046615|0.9654360742913706,-0.2606399556032559,0.5937493888437732|0.9996936110735278,0.02475245399490867,0.8622942838038886"/>
                    <discreteMappingEntry attributeValue="3429480" value="0.6901539052000286,-0.7236626196903844,0.3622102706356995|0.833577246060534,-0.5524029098856522,0.5406388983432913|0.961869190070605,-0.2735098923127248,0.6166153499588937"/>
                    <discreteMappingEntry attributeValue="3429481" value="0.9729778977186132,0.23089826883514708,0.38351412958315856|0.9137956928381079,0.4061741396870588,0.38623427185245396|0.9830164707937218,0.18351735108227754,0.4301549411816263"/>
                    <discreteMappingEntry attributeValue="3429482" value="0.9046202241460009,-0.4262185473041256,0.3307083395851868|0.9989709775643822,0.045354007364978285,0.5252144490552211|0.959708746500388,0.2809966581485518,0.6659542796321086"/>
                    <discreteMappingEntry attributeValue="3429483" value="0.9993228644076727,0.03679419345554664,0.4329201202944122|0.9999410347480926,0.010859421113202997,0.7435450285689812|0.998721574035837,-0.050549159789063394,0.9165581162285461"/>
                    <discreteMappingEntry attributeValue="3429460" value="0.5523597006883944,0.8336058787313267,0.7070009203576118|0.45602514219214535,0.8899668924677107,0.7515956048362638|0.8456202532809153,0.5337849634835369,0.7259510866327152"/>
                    <discreteMappingEntry attributeValue="3429461" value="0.9012765142408556,0.43324432469202956,0.20244208269184752|0.8676884509888136,0.49710839061580236,0.5021556831824199|0.9075802371816063,0.41987868852488724,0.7156172308399539"/>
                    <discreteMappingEntry attributeValue="3429462" value="0.43442210571127193,0.9007094060069455,0.6384619152639207|0.576983909837791,0.8167555128606698,0.935167996112457|0.787733168722277,0.6160166027752504,1.0364772597378025"/>
                    <discreteMappingEntry attributeValue="3429463" value="0.6044768275038209,0.7966227243877216,0.42016253507599766|0.7983651872931444,0.6021735860351087,0.6797855658470705|0.8871807430991491,0.4614220725908565,0.8567853192286193"/>
                    <discreteMappingEntry attributeValue="3429456" value="0.9713372869277582,0.23770543751420978,0.44644472385115175|0.9626627671843211,0.2707035217300019,0.5563721963611995|0.9998406217530377,0.017853041547564095,0.7293090223334858"/>
                    <discreteMappingEntry attributeValue="3429457" value="0.9418906959790573,0.3359195094484497,0.1873227541748548|0.9322117410630257,0.3619133457393389,0.44204356564175024|0.9601817166190751,0.2793762177968019,0.7628513486900156"/>
                    <discreteMappingEntry attributeValue="3429458" value="0.9993662366007989,0.035596701284753535,0.37524620147918486|0.9616714515303775,0.27420433860801113,0.49532223939972764|0.974961573388115,0.22237340312315082,0.6524117728971618"/>
                    <discreteMappingEntry attributeValue="3429459" value="0.9999686752609178,0.007915080348618618,0.15181936452103875|0.9948436640447014,-0.10142033380990892,0.37304569076991223|0.9878348610791855,0.1555065504622435,0.5374440323071643"/>
                    <discreteMappingEntry attributeValue="3429468" value="0.9139782685541226,0.40576313855599083,0.5845131336835319|0.9251932637404714,0.37949627762239585,0.6849880010846897|0.995289187028015,0.09695067913693471,0.7686583184676323"/>
                    <discreteMappingEntry attributeValue="3429469" value="0.5666192543140771,0.8239797452853796,0.40569754279344505|0.6360227510315679,0.7716703053573049,0.6255178129488055|0.8081624617107757,0.5889596212658208,0.6454144847043636"/>
                    <discreteMappingEntry attributeValue="3429470" value="0.49392085694264737,0.8695068643070282,0.3755601998559878|0.6584947203364457,0.7525853461827609,0.7461411003235113|0.8340193359787562,0.5517352147666076,0.8895104492822132"/>
                    <discreteMappingEntry attributeValue="3429471" value="0.9161474333194002,0.40084146544771937,0.3249375909363668|0.8889875994317521,0.4579312700139298,0.6610890866717208|0.9153040927011669,0.4027634763536706,0.9139304000108017"/>
                    <discreteMappingEntry attributeValue="3429464" value="0.9540820515102578,0.2995453871886158,0.3652440895717508|0.9928472515062,0.11939152053887418,0.5206289066026887|0.9740442749105699,0.22635757224785336,0.6835072036770788"/>
                    <discreteMappingEntry attributeValue="3429465" value="0.9350381661504725,-0.35454707422563975,0.48271664511214635|0.9274361099247513,-0.3739816332490735,0.8869965807162677|0.976432335893741,-0.2158237554605436,0.983301094338788"/>
                    <discreteMappingEntry attributeValue="3429466" value="-0.9927911975394516,0.11985673985296666,0.4119851892604978|-0.011378607949401428,0.9999352615450331,0.20214882571223314|0.9461976899230979,0.3235891400900114,0.4477798837526016"/>
                    <discreteMappingEntry attributeValue="3429467" value="0.9943249959972569,-0.10638516031409218,0.396923906894443|0.944970319097877,-0.3271560728827398,0.516682343374179|0.9799487531369216,-0.19924969567202003,0.7209644500786512"/>
                    <discreteMappingEntry attributeValue="3429444" value="0.9894703424431686,0.1447357641545404,0.34298186391147945|0.8839279742699431,0.4676230707557475,0.643874853694475|0.9426689230834947,0.33372938356189785,0.8402856738798107"/>
                    <discreteMappingEntry attributeValue="3429445" value="0.9960827232695447,0.08842628796872334,0.4886516678076815|0.9450242471623402,0.32700026341771055,0.8024915943434384|0.9999217051926786,0.01251333227265451,0.9063390835311027"/>
                    <discreteMappingEntry attributeValue="3429446" value="0.12002463010414692,-0.9927709142437458,0.42778034835259526|0.8646355657522143,-0.5023995804500121,0.7523003870982441|0.958775264088058,-0.2841654324031595,1.1531798163798928"/>
                    <discreteMappingEntry attributeValue="3429447" value="0.9565411204603415,0.29159747061398616,0.38451520505615844|0.8059279105009072,0.5920136848719307,0.5205357654055348|0.9449347457117557,0.32725880636991195,0.586715990734166"/>
                    <discreteMappingEntry attributeValue="3429440" value="0.9607116178236742,-0.2775485315735224,0.32982752503144386|0.998400924114923,0.056529591600044296,0.5989022597662272|0.9953888553373981,0.09592198220483361,0.8959333168073749"/>
                    <discreteMappingEntry attributeValue="3429441" value="0.8298308652496752,0.5580149953889908,0.07696710333297503|0.9890166384047424,-0.14780422510396313,0.3523280664839503|0.9861400531988791,-0.16591502486788803,0.5260082454594847"/>
                    <discreteMappingEntry attributeValue="3429442" value="0.9261934529107144,0.37704865440063334,0.27494599807266745|0.7319566208750262,0.6813512347953977,0.5079384890651178|0.9765597387246293,0.21524654864151418,0.6875795648046408"/>
                    <discreteMappingEntry attributeValue="3429443" value="0.8383709466981788,0.5451001336749052,0.4768349907616246|0.9653750353060867,0.26086594489847054,0.6233942028809304|0.9989489801521747,-0.04583595807802068,0.897922342311333"/>
                    <discreteMappingEntry attributeValue="3429452" value="0.9934384764690024,-0.11436779909986618,0.3697883101709572|0.9696782005806445,0.2443853254978364,0.5156014397333092|0.9723850642937149,0.2333822759733653,0.6222294844238275"/>
                    <discreteMappingEntry attributeValue="3429453" value="0.8138380457812717,0.5810917614619232,0.6207431627131966|0.7612127793580448,0.6485022008767592,0.9003388197467261|0.8502114155093821,0.5264414012380988,1.147233767160551"/>
                    <discreteMappingEntry attributeValue="3429454" value="0.9928000062430319,-0.11978375350537254,0.46266475783464606|0.9787292520859603,-0.20515616274257226,0.6756994284706836|0.9873824914781841,-0.15835345124857128,0.8528623191223218"/>
                    <discreteMappingEntry attributeValue="3429455" value="0.7279512520151318,-0.685628889917572,0.5732501646099954|0.7639017316428635,-0.6453325843261245,0.98039677897201|0.9266159759893776,-0.3760090863812378,1.0496255946195903"/>
                    <discreteMappingEntry attributeValue="3429448" value="1.0,0.0,0.25|1.0,0.0,0.5|1.0,0.0,0.7499999999999999"/>
                    <discreteMappingEntry attributeValue="3429449" value="0.9159795434566977,-0.40122496927392187,0.3729592667774578|0.9999034596374351,0.01389501367715043,0.5388474053006082|0.9886839654614671,0.15001338753387497,0.659257265914819"/>
                    <discreteMappingEntry attributeValue="3429450" value="0.6302237179246027,-0.776413591692785,0.3976240283809269|0.8739713603738938,-0.48597742874150596,0.5709938377916474|0.9421139842922938,-0.3352927684888233,0.7006095703128365"/>
                    <discreteMappingEntry attributeValue="3429451" value="0.5031434402822924,-0.8642029151194176,0.5407167705297797|0.8205812162217602,-0.5715299358598961,0.7701705547672211|0.8917820383065624,-0.4524652430339736,0.9302266803259194"/>
                    <discreteMappingEntry attributeValue="3429556" value="0.948690654614477,-0.3162056954691916,0.39356837733609557|0.993313421255471,-0.11544889412095426,0.6429515889111088|0.9987528871268183,0.04992665075733522,0.8658389670316974"/>
                    <discreteMappingEntry attributeValue="3429557" value="0.9999891553862684,0.004657156842699615,0.27505042936589547|0.9825780011337324,0.18585067039975667,0.45716694684785986|0.996032981742876,0.08898482612443315,0.603359454809046"/>
                    <discreteMappingEntry attributeValue="3429558" value="0.9516749156822806,0.30710723674495877,0.3518480786103616|0.9339374314619603,0.357436531588807,0.6799588637400689|0.9697354457590961,0.24415807428468794,1.011088763188039"/>
                    <discreteMappingEntry attributeValue="3429559" value="0.8235626413335025,0.567225330710631,0.2185282067104955|0.7987907456485378,0.6016089632529198,0.41727196330189914|0.956939021609478,0.29028900930123935,0.672533133862438"/>
                    <discreteMappingEntry attributeValue="3429552" value="0.5046928261784727,0.8632989929358112,0.23953544437474525|0.5897899209288999,0.8075567157609934,0.2528058646782933|0.9642570373827137,0.26496861296748303,0.6545727208934637"/>
                    <discreteMappingEntry attributeValue="3429553" value="0.8376132645288858,-0.5462636900666772,0.29728458273279607|0.9862652598187025,-0.1651691171943086,0.5018962041021497|0.9799281267294702,-0.19935111347687895,0.6458148681399305"/>
                    <discreteMappingEntry attributeValue="3429554" value="0.9073587364023575,-0.4203571380080479,0.23599343859923214|0.9382163691187785,-0.34604919407155976,0.4618387067104054|0.9991858734575135,-0.04034340445408345,0.6900666775096189"/>
                    <discreteMappingEntry attributeValue="3429555" value="1.0,0.0,0.25|1.0,0.0,0.5|1.0,0.0,0.75"/>
                    <discreteMappingEntry attributeValue="3429564" value="0.9938682965236165,-0.11057038104865452,0.3074004380565455|0.9991405627649074,0.041450402143093826,0.5648347164940521|0.999616002095114,0.027710076784104743,0.8488414817369305"/>
                    <discreteMappingEntry attributeValue="3429565" value="0.8671140527819964,-0.49810964602984875,0.31277909369527657|0.952373111684158,-0.3049351671110343,0.47571681102446384|0.9999685294288273,0.007933482964533693,0.8754793982048763"/>
                    <discreteMappingEntry attributeValue="3429566" value="0.9905664245996403,-0.13703342094498394,0.4445218951756375|0.967184535889092,-0.2540749368532867,0.7999120096893018|0.9612574631097371,-0.27565211701677955,0.6893350113725223"/>
                    <discreteMappingEntry attributeValue="3429567" value="0.36315383429993325,-0.9317291949022831,0.27060465650840193|0.28436967862148826,-0.9587147051551423,0.2632902711984882|0.827040870476298,-0.5621417957791497,0.3252660863300867"/>
                    <discreteMappingEntry attributeValue="3429560" value="0.9996182111075848,0.02763027365177772,0.40249843085847986|0.9723656531633273,0.23346313745055294,0.6611653030995712|0.9905716684768888,0.13699550945528347,0.8765119151579307"/>
                    <discreteMappingEntry attributeValue="3429561" value="0.761011923651628,-0.6487378916481207,0.48727418977799597|0.8877622416607154,-0.46030229445609067,0.8004187736481262|0.9536362941541544,-0.3009614900148042,1.0674095507846857"/>
                    <discreteMappingEntry attributeValue="3429562" value="0.999983200135042,0.005796503056191566,0.23456803156481287|0.9965234649287174,-0.08331256715804308,0.4981158848799419|0.9991695985842827,-0.040744487540321755,0.7251984904475322"/>
                    <discreteMappingEntry attributeValue="3429563" value="0.8918236059421719,0.45238330637226404,0.2171900848157394|0.927426110838043,0.37400642900332864,0.49150017698097853|0.9802703830292601,0.19766126619969773,0.7388162102224471"/>
                    <discreteMappingEntry attributeValue="3429540" value="0.9141927612085373,-0.4052796508016536,0.5250993991261257|0.9580597116059655,-0.2865686462219729,0.8520949938399328|0.9751825527670761,-0.2214023233362487,0.8153785856416387"/>
                    <discreteMappingEntry attributeValue="3429541" value="0.9436480193331793,-0.33095077520466337,0.21816959294464028|0.9351435386335959,-0.35426905333635383,0.4532692714552703|0.9456963148374724,-0.3250515037695169,0.7460952072764016"/>
                    <discreteMappingEntry attributeValue="3429542" value="0.9743381229779302,-0.22508936472397745,0.2363607137406528|0.9770974798881031,-0.2127921868779911,0.47412157436796376|0.9957808061937059,-0.0917637511014732,0.7512497725903187"/>
                    <discreteMappingEntry attributeValue="3429543" value="0.9742149884235883,0.22562171068145823,0.28751391201046933|0.9982412663675473,-0.05928215685107541,0.49623006073769316|0.9974017551951622,-0.07203984129361893,0.71165249481286"/>
                    <discreteMappingEntry attributeValue="3429536" value="0.5652246635566641,-0.8249370156001341,0.15115528169146566|0.9446531793408947,-0.32807067952064767,0.281340801336252|0.9864351363378174,-0.16415152085250853,0.5587210329110984"/>
                    <discreteMappingEntry attributeValue="3429537" value="0.9429363699051875,0.33297297534488807,0.5268233733692941|0.9708976843606719,0.23949464817211485,0.7306600860419616|0.9920984875105162,0.12546151234281414,0.8508557250838448"/>
                    <discreteMappingEntry attributeValue="3429538" value="0.8455688516335772,0.5338663851068669,0.26442191951063776|0.8747591811995471,0.4845579169790727,0.4894144436636088|0.9836073258893563,0.18032367691678666,0.6464477189752622"/>
                    <discreteMappingEntry attributeValue="3429539" value="0.9782383380648131,-0.20748434625337997,0.3761928911441555|0.9969388526227956,-0.07818519125220502,0.7156066084060189|0.996970064360732,0.07778618623224766,0.8623716116089386"/>
                    <discreteMappingEntry attributeValue="3429548" value="0.9887805385489938,0.14937552204682572,0.36927458584537054|0.9997427942275313,-0.022679184071036907,0.5616257257641324|0.9999356838143174,0.011341438832592516,0.7784010435209919"/>
                    <discreteMappingEntry attributeValue="3429549" value="0.6127111358990025,-0.7903069428679936,0.2979490286630174|0.6963898919203835,-0.7176636527170069,0.5804106303653614|0.9328111716493086,-0.36036553393220633,0.5877650507653558"/>
                    <discreteMappingEntry attributeValue="3429550" value="-0.3004640597814559,-0.9537931373099965,0.20044450788510387|-0.04848983171127938,-0.9988236762415135,0.24973822015388014|0.8601505870056692,-0.5100401628046588,0.43403295789692753"/>
                    <discreteMappingEntry attributeValue="3429551" value="0.6028957414460352,-0.797819982794512,0.28136233047136033|0.7935881898144574,-0.6084552448512649,0.6870282281842983|0.9960981490951087,-0.08825235050296686,0.914011670028744"/>
                    <discreteMappingEntry attributeValue="3429544" value="0.9429472070420181,-0.3329422843852332,0.1926887361857688|0.9841265137511819,-0.17746832092501702,0.42363270178311574|0.9931792887651905,-0.11659717135449908,0.7223628994529084"/>
                    <discreteMappingEntry attributeValue="3429545" value="0.5725030215530041,0.8199026102609264,0.35433660675990336|0.6293633263927875,0.7771111911379257,0.640686720097927|0.9184617458882763,0.3955098245807041,0.7834084829225564"/>
                    <discreteMappingEntry attributeValue="3429546" value="0.8246137800427366,0.5656961320034187,0.2229686236015751|0.9825307099553057,0.18610052121024007,0.504881132964961|0.9965575865700437,0.08290341759957733,0.7267370160789209"/>
                    <discreteMappingEntry attributeValue="3429547" value="0.9979660158996898,0.06374818514514803,0.2393569831289847|0.9984455221198393,0.05573633786715389,0.4961821932256409|0.9990748361684239,0.043005484941307646,0.7573745809900188"/>
                    <discreteMappingEntry attributeValue="3429524" value="0.9016954566412514,0.43237171909425937,0.3269726568152348|0.874777241942577,0.4845253109790428,0.5241970723479104|0.9568841682101541,0.29046977231505783,0.8039341504968914"/>
                    <discreteMappingEntry attributeValue="3429525" value="0.9490245177338369,0.31520226004909657,0.23693272896959466|0.9758129711924296,0.2186070567310272,0.46678276134104263|0.9957339196401962,0.09227112916818186,0.7352807564656216"/>
                    <discreteMappingEntry attributeValue="3429526" value="0.7172120530137746,0.6968549856403172,0.22209620061277421|0.9964683118891284,0.08396965762006335,0.367520939724639|0.9953790039814723,-0.09602415546544628,0.7338061478055125"/>
                    <discreteMappingEntry attributeValue="3429527" value="0.8090805738709165,0.5876977326693616,0.4028023904370514|0.81542843415861,0.5788579003223826,0.6854963076006882|0.9241114120848317,0.3821231451437852,0.9470623293558317"/>
                    <discreteMappingEntry attributeValue="3429520" value="0.9977859808274079,-0.06650666481103704,0.36278367830750907|0.9999433973726047,0.010639645244701491,0.6133854685806134|0.9999916958419375,0.004075321725459595,0.8189784628064743"/>
                    <discreteMappingEntry attributeValue="3429521" value="0.8908871858134483,-0.4542246384261806,0.33294741362691244|0.9221505108830022,-0.38683127494841746,0.5856441721656868|0.9893521618409317,-0.14554140256530082,0.7683864672162041"/>
                    <discreteMappingEntry attributeValue="3429522" value="0.4644138087314616,-0.8856183231277103,0.17547854105838334|0.9248922932165707,-0.3802292018619729,0.3413528032334116|0.9622137171416311,-0.2722953590212019,0.6693074868628"/>
                    <discreteMappingEntry attributeValue="3429523" value="0.8780438512318276,-0.4785801869216696,0.3234899135175957|0.9930577180676251,-0.11762809437511605,0.5806880179669471|0.9999998867767016,4.758640393932233E-4,0.807801854576624"/>
                    <discreteMappingEntry attributeValue="3429532" value="0.9123367443239329,-0.4094406733049451,0.46525759994099597|0.9485085192485508,-0.31675162022146225,0.7303133851460222|0.9999494674258534,0.010052989344073802,0.7839802916131344"/>
                    <discreteMappingEntry attributeValue="3429533" value="0.956134423982068,0.2929282561933535,0.19331213632045174|0.9814877174992277,0.19152509077965793,0.36983579132670485|0.9898475505980594,0.14213312975876607,0.5079179671648307"/>
                    <discreteMappingEntry attributeValue="3429534" value="0.36215344562735524,-0.9321184912983081,0.08578974431787033|0.8842550885190978,-0.46700421671338516,0.23164434677259657|0.9920672294312924,-0.12570844159609715,0.588570593458297"/>
                    <discreteMappingEntry attributeValue="3429535" value="0.7946797000641104,0.6070289732014573,0.4115611751125133|0.932410313618919,0.3614014486095332,0.678158697883539|0.9764624887681873,0.21568729222797914,0.8045940572638606"/>
                    <discreteMappingEntry attributeValue="3429528" value="0.9910298748875657,0.13364051436722302,0.2651684322830816|0.9981944662769293,0.06006502721314812,0.48571063102194484|0.9902947893798565,0.13898284112474346,0.7348577997010087"/>
                    <discreteMappingEntry attributeValue="3429529" value="0.9958910159988296,-0.0905598379681578,0.3174788680517134|0.988581798474877,-0.15068519411069423,0.5949973909726425|0.9905702789847205,-0.13700555606300424,0.7455800818841811"/>
                    <discreteMappingEntry attributeValue="3429530" value="0.9694346276387773,-0.24534975592990754,0.42164536157705657|0.9773399513596539,-0.2116757413505604,0.6249509405528166|0.9908041360707021,-0.13530396869711442,0.7390417534264109"/>
                    <discreteMappingEntry attributeValue="3429531" value="0.5420216423279667,0.8403645275998349,0.3964238250316575|0.5150867987501048,0.8571380225805929,0.6254196207536242|0.8758942176249186,0.48250318085089533,0.6404274534285344"/>
                    <discreteMappingEntry attributeValue="3429508" value="0.8743588947679097,-0.48527984003071806,0.32788818728616964|0.8520399284945966,-0.5234768001076291,0.605229681136059|0.9925626740064089,-0.12173470404632916,0.7940965987658513"/>
                    <discreteMappingEntry attributeValue="3429509" value="0.9016435994453282,-0.4324798487551443,0.34924015045148216|0.919632190332333,-0.39278064425905157,0.7264728284585482|0.9633603266394639,-0.2682105163059521,0.8392289270424089"/>
                    <discreteMappingEntry attributeValue="3429510" value="0.640886144833431,-0.767635948455088,0.2546822000810238|0.9437521830459097,-0.330653620872477,0.3993473975521142|0.9949991980333408,-0.09988291101589225,0.6949666845021054"/>
                    <discreteMappingEntry attributeValue="3429511" value="0.9612745494055571,0.2755925265045174,0.3209463175374052|0.9360357215197976,0.35190499859892843,0.6129130595726822|0.989378603610027,0.1453615448413815,0.755095480035666"/>
                    <discreteMappingEntry attributeValue="3429504" value="0.9720725854801684,-0.23468039662038392,0.31487693850881043|0.9864098897340206,-0.1643031631920622,0.49822588210325197|0.9999956916823234,0.0029354074319641074,0.7909699730537934"/>
                    <discreteMappingEntry attributeValue="3429505" value="0.6727967582692683,-0.7398273596335592,0.20907959732566278|0.7990368395155901,-0.6012820711587342,0.5001915842993052|0.9458834026656114,-0.32450668492609636,0.6888861581272399"/>
                    <discreteMappingEntry attributeValue="3429506" value="0.9065004920555696,0.42220475826666165,0.5852858977115221|0.8214370789979548,0.5702991541702546,0.7894064208197501|0.9995492496623735,0.030021617201380153,0.8655582217060691"/>
                    <discreteMappingEntry attributeValue="3429507" value="0.9153650484154321,-0.40262492240224484,0.18235820239512687|0.9757256604822908,-0.2189964279991739,0.450778709904121|0.9998078408185701,-0.01960309765595184,0.7038223460600297"/>
                    <discreteMappingEntry attributeValue="3429516" value="0.9947997938600753,0.10184974293512786,0.30302079917289393|0.9966018807020673,0.08236923807528104,0.439060032408251|0.9999452990849679,-0.010459389937952555,0.6505535220141442"/>
                    <discreteMappingEntry attributeValue="3429517" value="1.0,0.0,0.25|1.0,0.0,0.5|0.9999999999999999,1.4901161193847656E-8,0.75"/>
                    <discreteMappingEntry attributeValue="3429518" value="0.8810875272095459,0.47295324229332414,0.33939407470306165|0.8902701571511337,0.4554328131416266,0.4987043674688008|0.9775683729112046,0.21061831896523167,0.7389737695273684"/>
                    <discreteMappingEntry attributeValue="3429519" value="1.0,0.0,0.25|1.0,0.0,0.5|1.0,0.0,0.75"/>
                    <discreteMappingEntry attributeValue="3429512" value="0.8075708258690468,-0.5897706004924166,0.24371570921364452|0.8945258762257775,-0.44701617058279336,0.5196075239059914|0.9737063156460637,-0.2278069596631503,0.730784951147785"/>
                    <discreteMappingEntry attributeValue="3429513" value="0.9971906493288273,0.07490533286189852,0.21405962032108589|0.991907411465134,0.1269633296685994,0.46053713226631293|0.999931520082328,0.011702783679316809,0.6873438282161674"/>
                    <discreteMappingEntry attributeValue="3429514" value="0.9534393182792914,-0.30158492395860914,0.3430904313353632|0.949933536544842,-0.31245203815531314,0.5067118222256949|0.9995897793071047,0.02864041034576403,0.7015043666233529"/>
                    <discreteMappingEntry attributeValue="3429515" value="0.6934331074321841,0.7205210097678936,0.4387367180151138|0.7323180960794897,0.6809627054064791,0.7369952028197537|0.9030907761896321,0.4294497059740615,0.8265966077191127"/>
                    <discreteMappingEntry attributeValue="3429620" value="0.7857635898623149,-0.6185269443174548,0.5154522258381932|0.9207269754614277,-0.39020742773254785,0.7033955496130764|0.9974625005747331,-0.07119381958569601,0.6808001816707537"/>
                    <discreteMappingEntry attributeValue="3429621" value="0.9734075429434498,0.22908023777880968,0.33390010502555534|0.9985002675859378,-0.0547468321531997,0.52582344219969|0.9765161321136651,-0.21544429377861704,0.6768082299316796"/>
                    <discreteMappingEntry attributeValue="3429622" value="0.9204335405050265,-0.39089908865765066,0.47001317812775684|0.8190192361936077,-0.5737660592478779,0.652114646081074|0.8654614064644858,-0.5009756021210157,0.8536850234729451"/>
                    <discreteMappingEntry attributeValue="3429623" value="0.9873623812434118,-0.15847879386637043,0.46657499250779166|0.9899417644988152,-0.14147544981717597,0.7261433114239839|0.9962369419891067,-0.08667153752064859,0.8734047679697917"/>
                    <discreteMappingEntry attributeValue="3429616" value="0.7418218988136424,-0.6705969508136181,0.3908720087444225|0.8884673412680689,-0.45893984736569643,0.5228348317190493|0.9825125656771175,-0.18619628966917628,0.749308426250065"/>
                    <discreteMappingEntry attributeValue="3429617" value="0.9999999999999999,1.4901161193847656E-8,0.25|0.9999999999999999,1.4901161193847656E-8,0.5|1.0,0.0,0.7499999999999999"/>
                    <discreteMappingEntry attributeValue="3429618" value="0.8380995712059969,0.5455172854679531,0.47942483676458353|0.9698234062386883,0.2438084508617125,0.5488726925702849|0.9964420795395045,0.08428037804250663,0.8177964981326951"/>
                    <discreteMappingEntry attributeValue="3429619" value="0.9225616471835101,0.38584972093555886,0.36753568431554473|0.9738225666956137,0.227309499569127,0.5387641575561929|0.9985767317728153,-0.05333395505607083,0.6012290679242214"/>
                    <discreteMappingEntry attributeValue="3429628" value="0.9601442935361656,-0.2795048042340909,0.3463893113566295|0.9901712278300256,-0.13986042891961772,0.4651868121677905|0.9931751207193162,-0.11663266945488135,0.6624831227754824"/>
                    <discreteMappingEntry attributeValue="3429629" value="0.3554059817759303,0.934712034863084,0.5802597560723355|0.8156662238679644,0.5785227836835606,0.6980494932045906|0.9637043816392908,0.2669716554416069,0.9081882898495512"/>
                    <discreteMappingEntry attributeValue="3429630" value="0.9626566623556753,-0.27072523048698555,0.40823599500755314|0.7933296428949939,-0.6087923108122354,0.7120524036440516|0.9439174070369362,-0.3301816601397887,0.9155602980650736"/>
                    <discreteMappingEntry attributeValue="3429631" value="0.9522467295300414,-0.30532960239606666,0.44761708437120473|0.9954278863797511,-0.09551608774202033,0.7164703736539217|0.9977285438481088,-0.06736284428921019,0.9435295105111169"/>
                    <discreteMappingEntry attributeValue="3429624" value="0.24986965699895558,-0.9682794816122173,0.5927762394709577|0.5111062641690871,-0.8595175313669404,0.776211084145462|0.8363497530039821,-0.5481962154650268,0.8258543174670844"/>
                    <discreteMappingEntry attributeValue="3429625" value="0.8971712278636129,0.44168290423526374,0.49065050930822357|0.8287934468284868,0.5595546644378512,0.7665147118969584|0.9063878109446603,0.4224466074795096,0.9013131325662994"/>
                    <discreteMappingEntry attributeValue="3429626" value="0.7932221208331659,0.6089323993851324,0.720328948499883|0.9304718314621068,0.36636344093748324,1.0295168022528056|0.9760516524746757,0.21753889698501006,1.1715797717073522"/>
                    <discreteMappingEntry attributeValue="3429627" value="0.4531166400970392,0.8914512384124946,0.4574000076681907|0.23669885909768232,0.9715830639229235,1.244792176604104|0.5822674943642278,0.8129972724473337,1.2642153129881728"/>
                    <discreteMappingEntry attributeValue="3429604" value="0.9426076109076923,-0.33390251849737906,0.3481633592094381|0.9730715342283315,-0.2305033389661007,0.6421495864440094|0.9941154664737345,-0.10832561708898435,0.8180159392149083"/>
                    <discreteMappingEntry attributeValue="3429605" value="0.8873967542429664,-0.4610065081525947,0.3720383039799197|0.921425249783664,-0.38855567047864886,0.5457555821122831|0.9868383925555856,-0.16170957602537941,0.7613480571143487"/>
                    <discreteMappingEntry attributeValue="3429606" value="0.32604049111215155,0.9453558050572002,0.2127669092343679|0.8508238663553043,0.5254509952794945,0.4101398924031069|0.9908819857439295,0.1347326624399856,0.6660414089441516"/>
                    <discreteMappingEntry attributeValue="3429607" value="0.9804700278135187,-0.19666856525474002,0.2878387942853307|0.9798465616617388,-0.19975163478597202,0.5750455675530791|0.9815667639719534,-0.1911195643193744,0.8657172142620757"/>
                    <discreteMappingEntry attributeValue="3429600" value="0.9946120201847023,0.10366739749846793,0.3368357922013579|0.9988908068041112,0.04708668688952016,0.6377633821504849|0.9988970434752648,0.04695419615300672,0.838529221893067"/>
                    <discreteMappingEntry attributeValue="3429601" value="0.8729473547577132,0.48781442764796445,0.24181572057748332|0.9480005901032417,0.3182685676655889,0.5358533354660729|0.9902550882622473,0.13926543063778907,0.7971151000805062"/>
                    <discreteMappingEntry attributeValue="3429602" value="0.952494496141805,0.30455579918886616,0.34075965014261905|0.9727831934721459,0.23171719508515876,0.5372999881049423|0.9977418499317584,0.06716547397846968,0.7545537912335144"/>
                    <discreteMappingEntry attributeValue="3429603" value="0.9952399430726,0.0974548906563848,0.24616899406866852|0.9854891577815568,-0.16973838662776874,0.4130770753774338|0.997347632427258,-0.07278530134404257,0.7023238540222513"/>
                    <discreteMappingEntry attributeValue="3429612" value="0.9826741477926575,0.18534162851333302,0.2891717764065249|0.9813890154199821,0.19203020703263865,0.5804550401249409|0.9945033482252333,0.10470477720142607,0.8418038308923548"/>
                    <discreteMappingEntry attributeValue="3429613" value="0.08944145758552811,0.9959920811256363,0.7001241520573259|0.4132302177038652,0.9106265904180572,0.843671941563252|0.7130595404857988,0.7011034814648843,0.8606098847672833"/>
                    <discreteMappingEntry attributeValue="3429614" value="0.7319102162317581,-0.6814010826052311,0.3389836219648159|0.8981466325724846,-0.4396960613863926,0.5499795448165408|0.9867016119091192,-0.16254208395349776,0.6966431270328901"/>
                    <discreteMappingEntry attributeValue="3429615" value="0.5452174411039881,-0.8382946629413903,0.2251487259933438|0.4636190768262235,-0.8860346221242149,0.5383320331070098|0.6905481950512766,-0.7232863819479971,0.7990153228736045"/>
                    <discreteMappingEntry attributeValue="3429608" value="0.988335872804219,-0.1522898635114061,0.31827305374536036|0.9987322438626783,-0.05033790886617768,0.6175210282039454|0.9994027118618588,-0.034557481435463784,0.8048687897114468"/>
                    <discreteMappingEntry attributeValue="3429609" value="0.94346366750581,-0.3314759540245512,0.22408091968865662|0.9429365307682486,-0.3329725198011689,0.447921653553311|0.9809645164135052,-0.19418706840986558,0.7259541779414327"/>
                    <discreteMappingEntry attributeValue="3429610" value="0.9496400787647608,0.31334281674175807,0.21931239222480417|0.9502692766010562,0.31142944939119893,0.43850416925101604|0.9721219132573118,0.2344759812111756,0.6356866642700676"/>
                    <discreteMappingEntry attributeValue="3429611" value="0.9998130922351379,0.01933340619786351,0.21433526616317627|0.9998142987182086,0.019270912760343064,0.42793177030457197|0.9998425663421446,0.017743802590034247,0.6429429919680913"/>
                    <discreteMappingEntry attributeValue="3429588" value="0.5638689585053659,0.8258642731309267,0.495130542915379|0.7069626580197819,0.7072508749839798,0.7542018977817444|0.8697855186067551,0.4934299865451816,0.8782502737033354"/>
                    <discreteMappingEntry attributeValue="3429589" value="0.8131582205624693,0.5820427031856671,0.3463857244328951|0.9075331204419308,0.41998051776354095,0.5314286608017676|0.9697261224313076,0.24419510124967816,0.7567559998458975"/>
                    <discreteMappingEntry attributeValue="3429590" value="0.898651048073178,0.43866421531392186,0.49613834190739897|0.961138962145277,0.2760650203236543,0.763031427629813|0.9999220656619663,0.012484494475403597,0.8859554158205009"/>
                    <discreteMappingEntry attributeValue="3429591" value="0.8971722283732354,-0.4416808719378768,0.4032764343986749|0.8150450209277982,-0.579397630182248,0.6276594089089476|0.9672048583937726,-0.2539975627825636,0.871053670609271"/>
                    <discreteMappingEntry attributeValue="3429584" value="0.9545467671054579,0.2980611840017392,0.5593733526295706|0.9757190547910282,0.21902585718974502,0.816753091712348|0.9865172206421844,0.1636574879937355,0.8403251311349869"/>
                    <discreteMappingEntry attributeValue="3429585" value="0.8332140012061864,-0.5529506562017783,0.3588770955723189|0.9973577372562777,-0.07264670629173528,0.6145154922400325|0.9944136380769467,-0.1055533817865218,0.6612416691051836"/>
                    <discreteMappingEntry attributeValue="3429586" value="0.9999767847949732,0.00681394680841023,0.38845273271503694|0.9986086554336739,0.052732848329574145,0.6714436148484627|0.9997646733050621,0.02169327110470848,0.7294771437451418"/>
                    <discreteMappingEntry attributeValue="3429587" value="0.8927669892331843,0.4505187043126127,0.6003430105337337|0.894209778209913,0.447648157098606,0.9518290475297474|0.8955207068650736,0.44501984627191515,0.8915103182096182"/>
                    <discreteMappingEntry attributeValue="3429596" value="-0.07306306916167131,0.9973273223594533,0.2093928434129994|0.18490916772026583,0.9827556154471968,0.5370858748523107|0.6172328074962504,0.7867805674711956,0.7138772845047264"/>
                    <discreteMappingEntry attributeValue="3429597" value="0.44374416027739344,0.8961535137573868,0.37283358909243597|0.9559704131082275,0.29346306285746565,0.34030489582700724|0.9080342382773906,-0.41889595619437414,0.5876213781772126"/>
                    <discreteMappingEntry attributeValue="3429598" value="0.8575791066004304,-0.5143520933391909,0.5339940856176429|0.887445585940348,-0.4609124992826648,0.8338746180187172|0.9844594781265104,-0.17561189004984507,0.9473878043949513"/>
                    <discreteMappingEntry attributeValue="3429599" value="0.03882580682431754,0.9992459940997716,0.2223974742466292|0.9277493217515944,0.373203960307841,0.5182740890216506|0.9817304267261446,-0.19027708543096292,1.086962810487718"/>
                    <discreteMappingEntry attributeValue="3429592" value="1.0,0.0,0.25|1.0,0.0,0.5|1.0,0.0,0.75"/>
                    <discreteMappingEntry attributeValue="3429593" value="0.9993533908169072,-0.03595553174060852,0.30449580740350835|0.979391958128805,-0.20196879054107625,0.48068064759228496|0.985997393008996,-0.16676072972814504,0.6540157403745215"/>
                    <discreteMappingEntry attributeValue="3429594" value="1.0,0.0,0.25|1.0,0.0,0.5|1.0,0.0,0.7500000000000001"/>
                    <discreteMappingEntry attributeValue="3429595" value="0.8188491820402194,-0.5740087256062085,0.32594422567673687|0.8991292040009244,-0.4376833038998221,0.5685551487545955|0.9340308277799159,-0.35719240299419186,0.8392551078276077"/>
                    <discreteMappingEntry attributeValue="3429572" value="0.8362529437714864,0.5483438830091234,0.3428632545161118|0.6260826509832094,0.779756701887093,0.26481519793461467|0.9827140284492638,0.18513005776755842,0.46233174529106186"/>
                    <discreteMappingEntry attributeValue="3429573" value="0.8837098263282238,0.4680351940302572,0.6930546501181287|0.9304866950157181,0.3663256889691548,0.6463536385093183|0.9992145891904423,-0.03962580912707917,0.843467438873853"/>
                    <discreteMappingEntry attributeValue="3429574" value="-0.9999423276259473,0.010739712379889563,0.48431813934368717|-0.9882230049042363,0.1530205625987623,0.6594973387477896|-0.05953245864641803,0.9982263703026045,0.07704033603416932"/>
                    <discreteMappingEntry attributeValue="3429575" value="0.9847244852715197,-0.17411975220158288,0.4634091058096589|0.9940414158857482,-0.1090030435531821,0.8245827842330243|0.9996678917236866,0.025770259151190578,1.3714258342052392"/>
                    <discreteMappingEntry attributeValue="3429568" value="0.9999220790027625,0.012483425923724875,0.26950198590378516|0.9881661758591862,-0.15338712099727242,0.5164315533896434|0.9976637969993883,-0.06831506537187278,0.896908336523626"/>
                    <discreteMappingEntry attributeValue="3429569" value="-0.4285433073267978,0.9035212414467131,0.2997060689894638|0.8046381029461482,-0.593765545722572,0.2838409804106419|0.996191701484074,-0.08718998735098898,0.793771208686165"/>
                    <discreteMappingEntry attributeValue="3429570" value="0.2684155009828534,-0.9633032330642952,0.1819016828319405|0.8414071338356887,-0.5404017349439317,0.7729812913977722|0.8012782388100914,-0.5982918886374761,0.8557421138314932"/>
                    <discreteMappingEntry attributeValue="3429571" value="0.9999886621431092,0.004761888830554797,0.6293325439455416|0.9702815144346819,0.2419788890509669,0.7977485129396132|0.9717988523330436,0.23581134536781567,0.7579498642849318"/>
                    <discreteMappingEntry attributeValue="3429580" value="0.917358690725773,-0.3980615939146799,0.4386827127671821|0.9550391592213436,-0.2964796862413832,0.5439836734291704|0.9770180742175821,-0.21315647457247733,0.7180263819346511"/>
                    <discreteMappingEntry attributeValue="3429581" value="0.8000057691969538,-0.5999923076603486,0.4226951880619028|0.7143806229194767,-0.699757333364346,0.396998864186212|0.9972610655537562,-0.0739619302789406,0.5102050867872389"/>
                    <discreteMappingEntry attributeValue="3429582" value="-0.19488430194160167,-0.9808262378508921,0.20657571649825843|-0.17265450132403917,-0.9849824481545584,0.46694266449131977|0.4800531198973201,-0.8772394211826376,0.5794082530719352"/>
                    <discreteMappingEntry attributeValue="3429583" value="0.9875485726394895,0.1573143880187282,0.6965533482601375|0.9676616584061399,0.252251689490237,0.8928099298211337|0.9673292229406442,0.2535235185245139,0.8686592010365168"/>
                    <discreteMappingEntry attributeValue="3429576" value="0.9144420839793959,-0.40471678374811626,0.599261282332564|0.960830498970893,-0.27713670317614875,0.9397303474325572|0.9391053769579043,-0.3436292929433584,0.8357751891567222"/>
                    <discreteMappingEntry attributeValue="3429577" value="0.7713820861053244,-0.6363722788084014,0.26736024641679895|0.917563382527665,-0.3975895358839187,0.5196870312600144|0.9954784268283737,-0.09498790301562705,0.9024608073422528"/>
                    <discreteMappingEntry attributeValue="3429578" value="0.8388302256195819,0.5443931048305088,0.2366434718666694|0.9944035729707221,-0.10564816166437405,0.5224096838628661|0.9874918248649729,-0.15767021223061034,0.7176110092005096"/>
                    <discreteMappingEntry attributeValue="3429579" value="0.12008618409421702,-0.9927634705153539,0.29666269359838066|0.17668613536180489,-0.9842672449954382,0.705878908383196|0.7674061316090154,-0.6411613129072017,0.8751955655591716"/>
                    <discreteMappingEntry attributeValue="3429684" value="0.9573437653368037,-0.2889514058985542,0.2509399971895608|0.9794387684477386,-0.2017416636730676,0.47374296525493265|0.9926204127791906,-0.12126300397924077,0.7032744008749157"/>
                    <discreteMappingEntry attributeValue="3429685" value="0.9159322218489859,0.40133298516167343,0.36463485589831945|0.947188075977247,0.32067857540927336,0.5951266731868071|0.9933205559879442,0.11538749088095022,0.691346894898739"/>
                    <discreteMappingEntry attributeValue="3429686" value="0.9174439464108554,0.39786505902639346,0.5043024909302091|0.9342660049884125,0.3565768247138218,0.7078875865992037|0.9855543208323643,0.16935961941577807,0.9525699954574858"/>
                    <discreteMappingEntry attributeValue="3429687" value="0.9765247073008859,0.2154054224733423,0.3273939622154597|0.9642389595962627,0.265034391724389,0.6147273341805024|0.9811519671111333,0.19323772259565064,0.8235990267552614"/>
                    <discreteMappingEntry attributeValue="3429680" value="1.0,0.0,0.25|1.0,0.0,0.5|1.0,0.0,0.75"/>
                    <discreteMappingEntry attributeValue="3429681" value="1.0,0.0,0.25|1.0,0.0,0.5|1.0,0.0,0.75"/>
                    <discreteMappingEntry attributeValue="3429682" value="0.9971663416945722,-0.07522823267539723,0.3387878350224843|0.9937964429321213,0.11121434266974255,0.49204269294565967|0.9985823794589902,-0.05322810755626494,0.7849164187964389"/>
                    <discreteMappingEntry attributeValue="3429683" value="0.9260582398161177,0.37738062545482365,0.3317758030629981|0.9959981659990248,-0.08937367244652668,0.5804806073938881|0.9989492311799025,-0.04583048685189423,0.7081278616851776"/>
                    <discreteMappingEntry attributeValue="3429692" value="0.8507139652758584,0.5256289083418315,0.4338231410104025|0.917914319878451,0.3967786553761188,0.7251258017060556|0.9807662032936616,0.19518620462762232,0.9559006191024183"/>
                    <discreteMappingEntry attributeValue="3429693" value="0.9943585604429112,-0.10607098224255965,0.4442998810363643|0.9702207135060829,-0.24222255692595496,0.8499226365408622|0.9947722718073782,-0.10211820231079162,1.0333855481141099"/>
                    <discreteMappingEntry attributeValue="3429694" value="0.9511022154557701,0.30887631141789723,0.32796427451667276|0.9855736688115617,0.16924698917652287,0.6367478518667247|0.9954170765976914,0.09562867570820877,0.8570431824570934"/>
                    <discreteMappingEntry attributeValue="3429695" value="0.7252306847717773,0.6885059577559652,0.3594013666118458|0.821587574541618,0.5700823250714069,0.6834854271630258|0.9548991414570589,0.2969303447688899,0.7172450489440401"/>
                    <discreteMappingEntry attributeValue="3429688" value="0.9037058645944698,-0.4281538395221534,0.4797978211642721|0.9708419470697821,-0.23972049100933027,0.6961208326080541|0.9961573695773746,0.08758136238199317,0.8222172055723881"/>
                    <discreteMappingEntry attributeValue="3429689" value="0.8196309645688574,-0.5728918588354388,0.308794700192494|0.9217423250174275,-0.38780289616178354,0.4489161716977177|0.9967205450042866,-0.08092067205824362,0.6565781635937448"/>
                    <discreteMappingEntry attributeValue="3429690" value="0.8987420631452763,0.4384777120143876,0.3048616473338686|0.9520452490267952,0.30595725813503344,0.44711001332798606|0.9987704141259933,0.04957479063588467,0.7980324758453562"/>
                    <discreteMappingEntry attributeValue="3429691" value="0.9997838226139569,0.02079201864716133,0.43645932841378454|0.9997603863544743,-0.02188994920853654,0.6179533005613747|0.9763345478623928,-0.2162656945757625,0.8317330107580171"/>
                    <discreteMappingEntry attributeValue="3429668" value="0.432850143109134,0.9014658915402192,0.40878108932326|0.591527086952863,0.8062851266153059,0.7373079872659898|0.6513159680604305,0.7588066352829977,0.811109402656499"/>
                    <discreteMappingEntry attributeValue="3429669" value="0.9823464537401502,-0.18707069472301371,0.31618772801842926|0.9890433284467752,-0.14762552101491225,0.4589574626788438|0.9909428076826612,-0.13428459294351072,0.7008713862961587"/>
                    <discreteMappingEntry attributeValue="3429670" value="0.8534900337405558,0.5211091654399729,0.6456185910825755|0.8490903533226956,0.5282476425828515,0.7947530814152066|0.9512051755615575,0.3085590931813655,0.8455185448868476"/>
                    <discreteMappingEntry attributeValue="3429671" value="0.7425287550502321,-0.6698141891028828,0.5072114981007364|0.750414639734019,-0.6609673732287112,0.6633006634502607|0.8693492857051335,-0.4941981580742427,0.6840634299092141"/>
                    <discreteMappingEntry attributeValue="3429664" value="0.9970489262565261,0.07676873485155541,0.2918115591935882|0.9991409918010262,-0.04144005915610701,0.5512077218066121|0.9867169627262571,-0.16244887032008004,0.658222510677943"/>
                    <discreteMappingEntry attributeValue="3429665" value="0.8421695455619929,0.5392128119100161,0.24714853295382172|0.9155282647318316,0.4022536469407348,0.46902569678275796|0.9498796273435568,0.3126158882041437,0.6084937537864782"/>
                    <discreteMappingEntry attributeValue="3429666" value="0.6112737247064176,-0.7914192526616615,0.15408790656504368|0.9766583173139436,-0.2147988156892311,0.4234511889560341|0.9976907971662695,-0.06791960872777213,0.7099252779333588"/>
                    <discreteMappingEntry attributeValue="3429667" value="0.4239134011452972,0.9057027262459942,0.6128559382073887|0.5717896479877357,0.8204002672196428,1.1141195170403009|0.5911842258638718,0.8065365528540753,0.9437719189727454"/>
                    <discreteMappingEntry attributeValue="3429676" value="1.0,0.0,0.25|1.0,0.0,0.5|1.0,0.0,0.75"/>
                    <discreteMappingEntry attributeValue="3429677" value="0.9197809118046676,0.39243225438255497,0.2449577561514717|0.613128527254496,0.7899831701161315,0.42832261305434394|0.8071790583595869,0.5903066726251115,0.5474259251481639"/>
                    <discreteMappingEntry attributeValue="3429678" value="0.5026662639871594,0.8644805533088593,0.3564375745060307|0.48448529535220414,0.8747994047708809,0.6242125390752064|0.6905253311249987,0.723308210291236,0.693202548621161"/>
                    <discreteMappingEntry attributeValue="3429679" value="0.2379110700391937,0.9712869415125511,0.10991401450033111|0.9914544166183156,0.13045359239222024,0.41245834198244485|0.8806236004168153,-0.4738164986457576,0.8841749535502885"/>
                    <discreteMappingEntry attributeValue="3429672" value="0.297160595420427,0.9548275134962216,0.30207392562390284|0.9974022754451052,0.07203263799783079,0.37584582210986234|0.9983881383243519,0.05675495796170364,0.6284648949182287"/>
                    <discreteMappingEntry attributeValue="3429673" value="0.9134057547664464,0.4070502759605236,0.32732009258522093|0.9959350952823629,0.09007378078503603,0.4558181529479578|0.9943032572665332,-0.1065881446933111,0.628999323376228"/>
                    <discreteMappingEntry attributeValue="3429674" value="0.7893298967288024,0.6139693104138823,0.5147294326406044|0.9385083824327459,0.34525644976375275,0.6816765689226032|0.9722722961496413,-0.23385162419770414,0.7481528151257473"/>
                    <discreteMappingEntry attributeValue="3429675" value="0.7747578677714959,-0.6322580535874298,0.4778117692799499|0.9555679173835308,-0.29477102175638253,0.6483491068989193|0.949232953622643,-0.31457399726746843,1.07853167022405"/>
                    <discreteMappingEntry attributeValue="3429652" value="0.9735332541893339,-0.22854540683970395,1.0083877137034485|0.9813229562521745,-0.19236750123784646,1.1151697083900876|0.9956305341576124,-0.09338008060088324,0.785411006950172"/>
                    <discreteMappingEntry attributeValue="3429653" value="0.7560829209196425,0.6544758335443882,0.30743195378950494|0.8343547716655078,0.5512278249499007,0.5770754949632888|0.8871861219889213,0.4614117303994978,0.7517068746107665"/>
                    <discreteMappingEntry attributeValue="3429654" value="1.0,0.0,0.25|1.0,0.0,0.5|1.0,0.0,0.75"/>
                    <discreteMappingEntry attributeValue="3429655" value="0.970041752455378,0.24293826066163202,0.7228100344794529|0.9619827182670077,0.27311032524534656,0.8043980945284303|0.996979626725817,0.07766353001023493,1.1370266735191201"/>
                    <discreteMappingEntry attributeValue="3429648" value="0.6126799488820895,-0.7903311206309923,0.267303225324432|0.9990988244298354,0.042444540554950706,0.25565214745143866|0.9930071693793366,0.11805406202768896,0.477258711383741"/>
                    <discreteMappingEntry attributeValue="3429649" value="0.8878362999691205,0.4601594337369841,0.2285119824695264|0.9696634983217873,0.24444365408484864,0.4204708756282814|0.9719251161804994,0.23529039193626838,0.5289890157696839"/>
                    <discreteMappingEntry attributeValue="3429650" value="0.8119178136014317,0.5837717567308912,0.3331968678118918|0.8931573586447997,0.44974429701625407,0.6394199494497063|0.9863370943981739,0.16473960123227166,0.6612665257770711"/>
                    <discreteMappingEntry attributeValue="3429651" value="0.6455526139581794,-0.7637157996347606,0.4810466178315934|0.9923077634850719,0.1237954059214422,0.23683530856560508|0.9773118298809793,-0.2118055409442627,0.6283184266465893"/>
                    <discreteMappingEntry attributeValue="3429660" value="0.9073114917295791,-0.42045910261932234,0.34797540097482693|0.7978039673759789,-0.6029169342779717,0.5189168538660776|0.9055149665239134,-0.4243143238227953,0.6601397531298867"/>
                    <discreteMappingEntry attributeValue="3429661" value="0.9873691406874449,0.1584366751043985,0.36342755440593366|0.9999905364368624,0.004350521430372646,0.6545405888578826|0.9982300542808297,-0.05947065436407985,0.8033160903386078"/>
                    <discreteMappingEntry attributeValue="3429662" value="0.8723723826574519,-0.4888419233009382,0.15020269794107924|0.9869963885224433,-0.1607424307507328,0.5014676061731385|0.9988382130128469,-0.04818946176606085,0.8090064407809857"/>
                    <discreteMappingEntry attributeValue="3429663" value="0.8808136658952612,0.47346307772850793,0.3694421117593001|0.9392727842910776,0.34317143921090915,0.6021652829448139|0.9519658406306356,0.30620424274070285,0.8298216122961645"/>
                    <discreteMappingEntry attributeValue="3429656" value="0.9147982753072383,-0.4039110242304636,0.3288166697888616|0.8457029576811406,-0.5336539209725447,0.5951083905693576|0.981821563755825,-0.18980626160394848,0.6446696031877615"/>
                    <discreteMappingEntry attributeValue="3429657" value="0.8434866411395833,-0.5371501523960166,0.26761181164285974|0.7289794372463497,-0.6845355944521769,0.47334640428928443|0.9384226138732096,-0.3454895045748467,0.4967622392025758"/>
                    <discreteMappingEntry attributeValue="3429658" value="0.9025752025596205,0.43053223308419075,0.38455927474176216|0.9818883528592706,0.1894604510691046,0.5741967982929176|0.9976356372226886,0.06872507070407535,0.7834267348947139"/>
                    <discreteMappingEntry attributeValue="3429659" value="0.9994077788704869,-0.03441063110667836,0.33866929749144226|0.9495550609754377,-0.3136003606119303,0.4880304932019872|0.9999759455581143,0.006936015077492704,0.7167914745632847"/>
                    <discreteMappingEntry attributeValue="3429636" value="0.9860048129888934,-0.1667168520658224,0.5230466002303494|0.9661338861365398,-0.25804130300924205,0.8166450549822641|0.9685941409201096,-0.24864711978069398,1.0157254162416902"/>
                    <discreteMappingEntry attributeValue="3429637" value="0.6663389634620513,-0.7456489695374888,0.20826766783524378|0.8977276515368663,-0.4405508638807814,0.4383861996497213|0.9559917735956573,-0.2933934709863691,0.7113041024776715"/>
                    <discreteMappingEntry attributeValue="3429638" value="1.0,0.0,0.25|1.0,0.0,0.5|1.0,0.0,0.75"/>
                    <discreteMappingEntry attributeValue="3429639" value="1.0,0.0,0.25|1.0,0.0,0.5|1.0,0.0,0.75"/>
                    <discreteMappingEntry attributeValue="3429632" value="0.9216128030376473,0.3881106044378211,0.43650503909696187|0.9588857664707463,0.2837923305161882,0.6730238730884851|0.9555809357275272,0.29472881649764665,0.8399105659455387"/>
                    <discreteMappingEntry attributeValue="3429633" value="0.9775142904179778,-0.21086918226387993,0.3619177487802032|0.9999585614915109,0.009103587195622561,0.597252725900963|0.9998283791641102,0.01852598764083497,0.7629985869788534"/>
                    <discreteMappingEntry attributeValue="3429634" value="0.743745550574699,-0.6684628306797153,0.28293902991001285|0.8446661618785607,-0.5352934475382088,0.46503324940160307|0.9605435829318855,-0.2781295117177896,0.8363560055380818"/>
                    <discreteMappingEntry attributeValue="3429635" value="0.5746439215687715,-0.8184035455715375,0.2556752276059173|0.7245940497983132,-0.689175930366753,0.41456867123624025|0.8971686069542077,-0.44168822793441787,0.7341621178852458"/>
                    <discreteMappingEntry attributeValue="3429644" value="0.5958509304377491,-0.8030950558286788,0.2174432475985565|0.8894205616743456,-0.45708977725485356,0.44674535182840175|0.9701341135384249,-0.24256916899930714,0.5510994074658531"/>
                    <discreteMappingEntry attributeValue="3429645" value="0.8092547773385591,-0.5874578328311906,0.3093445546434218|0.9441510325828033,-0.32951301593840915,0.5068009722999586|0.9929076336637574,-0.11888831318610603,0.6276198654397439"/>
                    <discreteMappingEntry attributeValue="3429646" value="0.9640963165307719,-0.2655528053924449,0.3697809747935091|0.9740373146844444,-0.22638752086260536,0.570648786705876|0.9925747056793024,-0.12163656376947776,0.6536284871479422"/>
                    <discreteMappingEntry attributeValue="3429647" value="1.0,0.0,0.25|1.0,0.0,0.5|1.0,0.0,0.7500000000000001"/>
                    <discreteMappingEntry attributeValue="3429640" value="0.6396667598739747,-0.7686523507492388,0.2968361315177264|0.7808554329181076,-0.6247117678435992,0.5416045354416626|0.9226488373862761,-0.38564118409442866,0.6416066623922795"/>
                    <discreteMappingEntry attributeValue="3429641" value="0.6327671002585037,0.7743421703810562,0.1464679543935143|0.875116223103522,0.48391279799259984,0.3801271372859096|0.9860815545076596,0.16626234648818608,0.6164908886265749"/>
                    <discreteMappingEntry attributeValue="3429642" value="1.0,0.0,0.25|1.0,0.0,0.5|1.0,0.0,0.7499999999999999"/>
                    <discreteMappingEntry attributeValue="3429643" value="0.27338857663099214,0.9619036782171488,0.25439053674344614|0.5654118818252323,0.8248087074533401,0.4722933397509111|0.8323817647018201,0.5542026685174691,0.6159645746057243"/>
                    <discreteMappingEntry attributeValue="3429748" value="0.9811817503224163,-0.19308643876316006,0.380059750487875|0.9977868856250868,0.0664930889235115,0.4818957609889031|0.9949410537525718,0.100460437773892,0.7804555502307554"/>
                    <discreteMappingEntry attributeValue="3429749" value="0.5910089761063387,0.8066649801260354,0.1978370269797426|0.9389634203595955,-0.3440169984559043,0.32686830849386017|0.9656132654796135,-0.25998273313779424,0.7066364549862035"/>
                    <discreteMappingEntry attributeValue="3429750" value="0.9994115497467473,-0.03430093632548354,0.4673478409577066|0.9958919992029207,-0.09054902497326948,0.829213887644902|0.982696311070904,-0.18522408106841015,0.8573605027938774"/>
                    <discreteMappingEntry attributeValue="3429751" value="0.9033891535049579,-0.4288216847707164,0.25278291890587035|0.8837648069409674,-0.4679313689127869,0.8662910477414364|0.9553109908286165,-0.2956026231312013,0.9075123286247702"/>
                    <discreteMappingEntry attributeValue="3429744" value="0.9701143723700724,0.24264810842250673,0.4314880476176289|0.9397610687124354,0.34183202560974496,0.6577623120384353|0.9723159466851603,0.2336700661653959,0.8017259736038195"/>
                    <discreteMappingEntry attributeValue="3429745" value="0.3058394885291347,-0.9520830884204579,0.3604947925509114|0.39377883182656037,-0.9192052173510056,0.5533945810965274|0.8971974340707807,-0.44162966872347603,0.6185692353638974"/>
                    <discreteMappingEntry attributeValue="3429746" value="0.31900498914590425,0.9477530358168321,0.6112627363416803|0.5810398203299874,0.8138751299744305,0.8161732176347597|0.8353834095012233,0.5496676806308622,0.8349606951537966"/>
                    <discreteMappingEntry attributeValue="3429747" value="-0.8531728003150839,-0.521628385733098,0.17184264128852747|-0.4423213362039228,-0.8968566415758854,0.21363137904138227|0.9425824743554668,-0.33397347056005167,0.4238381607093671"/>
                    <discreteMappingEntry attributeValue="3429756" value="0.775404322072536,-0.6314650721229409,0.3605737284403865|0.9114606952028567,-0.411387166912539,0.7445734871206682|0.9677762732156786,-0.25181160616773046,0.9222307643437848"/>
                    <discreteMappingEntry attributeValue="3429757" value="0.9844418486200871,-0.1757106902993256,0.32400166609044445|0.9761349539383355,0.21716480308697275,0.414837861529607|0.9895732506742174,0.1440304882657226,0.7374302214623021"/>
                    <discreteMappingEntry attributeValue="3429758" value="0.6488958992051435,-0.7608771990240925,0.3088145596230566|0.8252131036271179,-0.5648215059663536,0.6429880319312957|0.8973183174048961,-0.4413840020318432,0.8117453824250107"/>
                    <discreteMappingEntry attributeValue="3429759" value="0.7860190924835558,-0.6182022211633725,0.5084307352663479|0.854488245198533,-0.5194707295098847,0.5238423018531452|0.9980444364982761,-0.06250842163131687,0.7215231473755118"/>
                    <discreteMappingEntry attributeValue="3429752" value="0.8323374146199832,0.554269274111169,0.36742090444450454|0.8206772176115322,0.5713920759805773,0.5759257970826341|0.9858205006997979,0.1678032788714208,0.8942622704470844"/>
                    <discreteMappingEntry attributeValue="3429753" value="-0.9661634855251531,-0.2579304542660429,0.2877324831506396|0.18457126927238912,-0.9828191321698918,0.3871139990790561|0.8644144281214878,-0.50277996823203,0.7163678980996423"/>
                    <discreteMappingEntry attributeValue="3429754" value="0.8083274289996834,-0.5887331887423725,0.48073190795749654|0.9449941796934082,-0.32708714487974394,0.9477152322145826|0.9952288864635429,-0.09756773825674359,1.06758901318617"/>
                    <discreteMappingEntry attributeValue="3429755" value="0.9999596785309333,0.008980050796772353,0.37900811801496725|0.9546742510121995,-0.29765260700067103,0.5751306965146289|0.9786111945545058,-0.20571856963483656,0.8229173355181769"/>
                    <discreteMappingEntry attributeValue="3429732" value="0.9546467527858699,-0.2977407889345937,0.3103572122802395|0.9809305709350091,-0.1943584703714171,0.43723884144404185|0.9963698829930033,-0.08512964386457195,0.7364013197504082"/>
                    <discreteMappingEntry attributeValue="3429733" value="1.0,0.0,0.25|1.0,0.0,0.5|1.0,0.0,0.75"/>
                    <discreteMappingEntry attributeValue="3429734" value="0.7073628790066294,-0.7068505905801116,0.29332656349558395|0.8401842714370726,-0.5423010142252691,0.53752935965903|0.8732818460266172,-0.48721537065279835,0.89864624415111"/>
                    <discreteMappingEntry attributeValue="3429735" value="0.8323649330995594,-0.5542279478212606,0.3016158934358528|0.8828378035315431,-0.4696779882596166,0.5191641611277835|0.9615266835263125,-0.2747115521176538,0.6735881290535214"/>
                    <discreteMappingEntry attributeValue="3429728" value="0.8040343889007935,-0.5945827961393834,0.44267021505771176|0.9421553682981517,-0.3351764639514148,0.7174245788670126|0.9921889425044055,-0.12474414764625057,0.8964310380725186"/>
                    <discreteMappingEntry attributeValue="3429729" value="0.9914422494959239,-0.13054602986863398,0.5397075110499773|0.9945089596564789,-0.10465146517363257,0.8372115389062088|0.9845559621614767,-0.17507014986081698,0.9627925845021014"/>
                    <discreteMappingEntry attributeValue="3429730" value="1.0,0.0,0.25|1.0,0.0,0.5|1.0,0.0,0.75"/>
                    <discreteMappingEntry attributeValue="3429731" value="0.45245417065452187,-0.891787656035521,0.4217465261489675|0.9706073060800762,-0.24066877110247878,0.4040779316922908|0.9948783206147004,-0.10107980594991973,0.7656996193396602"/>
                    <discreteMappingEntry attributeValue="3429740" value="0.9611354870209454,-0.2760771189160921,0.39860225688526646|0.9821281302823059,-0.18821353752634767,0.6106827568907794|0.997684208769671,0.06801631842165165,0.6946271525479388"/>
                    <discreteMappingEntry attributeValue="3429741" value="0.997616748220403,0.06899872223562545,0.22058801567283048|0.9562038102146837,-0.2927016797541845,0.37039371699993184|0.9640973503118645,-0.26554905219496083,0.6554148049043098"/>
                    <discreteMappingEntry attributeValue="3429742" value="0.761062259198862,0.6486788401228486,0.20242424307279325|0.8987357083648654,0.4384907370856352,0.40287968234319305|0.9980001128631135,0.06321214064728924,0.5248153592719194"/>
                    <discreteMappingEntry attributeValue="3429743" value="0.6986646779120207,-0.7154492769149273,0.36348310151391633|0.7278169174645823,-0.6857714886551886,0.5481544831505666|0.904789451613269,-0.42585918828805375,0.7510754859318759"/>
                    <discreteMappingEntry attributeValue="3429736" value="0.9733458950027585,-0.22934203426602606,0.5072656975403648|0.9671423285452767,-0.2542355528560474,0.6654581270719903|0.9991534857470602,-0.04113771893893937,0.8381859936237693"/>
                    <discreteMappingEntry attributeValue="3429737" value="0.9543543123725221,0.29867682611138496,0.3497914809187823|0.9979667565980099,-0.06373658859123545,0.4943926322629431|0.943071459750071,-0.3325901709384542,0.7495199255636409"/>
                    <discreteMappingEntry attributeValue="3429738" value="0.9335956195252759,0.358328367846053,0.26580889242054667|0.9994003169073693,-0.034626674189846905,0.4301838410210617|0.99958427061521,0.028832029735322645,0.7710353955383734"/>
                    <discreteMappingEntry attributeValue="3429739" value="0.8530947761782303,0.5217559801836632,0.47676375351779593|0.9270665717474067,0.37489674785000526,0.7029226567246138|0.9956893781225575,0.09275053797102553,0.7688403257370452"/>
                    <discreteMappingEntry attributeValue="3429716" value="0.9413936745674711,-0.33730987160822057,0.2545918232103923|0.9791655958527843,-0.20306337901813293,0.455894739628739|0.9977061418069356,-0.06769382985707686,0.6714290737341093"/>
                    <discreteMappingEntry attributeValue="3429717" value="0.8329438040076027,-0.5533575872483762,0.36118132468127034|0.7667830270558837,-0.6419063712248195,0.4904388671808289|0.930690573001632,-0.36580740468980916,0.6717834783563309"/>
                    <discreteMappingEntry attributeValue="3429718" value="0.9928468835444316,-0.11939458043022651,0.1665493637304953|0.9787162673480786,0.20521809868587212,0.33655859043222625|0.9786647746095283,0.20546352216021516,0.8090432345998992"/>
                    <discreteMappingEntry attributeValue="3429719" value="0.9617931484104248,0.27377717156615244,0.30691980457223395|0.9256578072362138,0.3783617632671732,0.544592552900772|0.9982463592702105,0.05919633606710577,0.7470966070497049"/>
                    <discreteMappingEntry attributeValue="3429712" value="0.9999999999999998,2.1073424255447017E-8,0.25|0.9999999999999998,2.1073424255447017E-8,0.5|0.9999999999999999,1.4901161193847656E-8,0.75"/>
                    <discreteMappingEntry attributeValue="3429713" value="0.9759531963723571,-0.21798017912319312,0.23948621371826753|0.9685549198533322,-0.2487998537537859,0.49875637729289635|0.9880556964805635,-0.1540971792483842,0.6753747102904403"/>
                    <discreteMappingEntry attributeValue="3429714" value="0.9540354985232363,-0.29969362281757006,0.3654774421016374|0.9996072020726678,-0.028025730399984138,0.49572516326786104|0.9994837595982846,0.03212809205786122,0.7271781333317827"/>
                    <discreteMappingEntry attributeValue="3429715" value="0.809600798545938,0.586980874470182,0.34097276381060465|0.834754935557424,0.5506216464710781,0.5813625031165502|0.9177894662934049,0.3970673690456911,0.8079116242706671"/>
                    <discreteMappingEntry attributeValue="3429724" value="0.7521560383891815,0.6589850483240814,0.3237626301665623|0.6894451056145426,0.7243379365628672,0.5734227015014839|0.8879581259080263,0.45992430533067696,0.7859779170316814"/>
                    <discreteMappingEntry attributeValue="3429725" value="0.950063660611274,0.31205615005300885,0.3606250793781187|0.9278306082185716,0.3730018263397052,0.65540707204208|0.9625855525269562,0.27097795863570606,0.9034580254786913"/>
                    <discreteMappingEntry attributeValue="3429726" value="0.6578200807650356,0.7531751066931793,0.3280140869195685|0.8645603913712061,0.5025289341640607,0.6187719915134144|0.9896780823136923,0.14330838561609918,0.8021852638191627"/>
                    <discreteMappingEntry attributeValue="3429727" value="0.9411928584685377,0.33786980209516077,0.044541559653976784|0.8339037430983764,0.5519099086323029,0.2913757567807025|0.9491800811315546,0.3147334961250477,0.7486873102531939"/>
                    <discreteMappingEntry attributeValue="3429720" value="0.5912154367857058,-0.8065136745934859,0.1718747284724508|0.9990430999865367,-0.04373653357652812,0.31198560018412247|0.9945915392455617,0.10386370906695176,0.6184682534105395"/>
                    <discreteMappingEntry attributeValue="3429721" value="0.983264714218698,-0.1821826055704061,0.3118663327413433|0.9985505125058293,-0.05382261582593051,0.5462315441342419|0.9987933567156685,0.04911039177859812,0.7424392408231579"/>
                    <discreteMappingEntry attributeValue="3429722" value="0.779085477914725,0.6269177123852735,0.19190619298943754|0.6360156572895581,0.7716761520758117,0.38594756634455724|0.9503854106833347,0.31107486423732345,0.7508778534360425"/>
                    <discreteMappingEntry attributeValue="3429723" value="0.685382890966658,-0.728182870417992,0.1741461814806999|0.8773130544688001,-0.4799185393987443,0.35350413367056616|0.9645937572687845,-0.26374018169040775,0.6395676742767965"/>
                    <discreteMappingEntry attributeValue="3429700" value="1.0,0.0,0.25|1.0,0.0,0.5|1.0,0.0,0.75"/>
                    <discreteMappingEntry attributeValue="3429701" value="0.7320488775074816,0.6812521126132646,0.21337586721359791|0.8647785198932396,0.5021534740806418,0.5972663922846249|0.980654715773288,0.19574557065643075,0.7985614154562806"/>
                    <discreteMappingEntry attributeValue="3429702" value="0.999878350208068,0.015597589082677318,0.14993391401274986|0.9856609043505147,-0.16873820443197077,0.4165938108871633|0.9990641987917077,0.04325189813965546,0.5899785548235191"/>
                    <discreteMappingEntry attributeValue="3429703" value="0.951064607014179,-0.30899209259294186,0.3309134422172764|0.9816352588983818,-0.19076744608949137,0.5621931966324344|0.9952650751730628,-0.09719789164769764,0.780154872885387"/>
                    <discreteMappingEntry attributeValue="3429696" value="0.9603756560259369,0.2787088073828155,0.2716743065102054|0.9922771041894717,0.12404091462641012,0.5123476999641883|0.9950047012009445,0.09982807514932408,0.7035379065231627"/>
                    <discreteMappingEntry attributeValue="3429697" value="0.9605523326260178,-0.27809929213630885,0.2876673685623463|0.9053483710336176,-0.4246696681737171,0.5446462702519346|0.9435104039101636,-0.3313429005023043,0.9471973817138342"/>
                    <discreteMappingEntry attributeValue="3429698" value="0.8599070458552159,-0.5104506562720392,0.28304386852766655|0.779951127647058,-0.6258404257333355,0.5366691108759772|0.9142482807027955,-0.4051543918458523,0.8661827772296323"/>
                    <discreteMappingEntry attributeValue="3429699" value="0.8268350436050331,0.5624444956319361,0.4692794340992511|0.9018599262245292,0.4320285563134535,0.8950469602654367|0.9874700407739002,0.15780658596519934,0.9327202293660581"/>
                    <discreteMappingEntry attributeValue="3429708" value="0.994626767334695,0.10352581176370686,0.25519773457067924|0.9617038901852198,0.27409054635761265,0.5322996102063899|0.9966527965358576,-0.08175086028449154,0.7790878073318152"/>
                    <discreteMappingEntry attributeValue="3429709" value="0.9999999999999999,1.4901161193847656E-8,0.25|0.9999999999999999,1.4901161193847656E-8,0.5|1.0,0.0,0.75"/>
                    <discreteMappingEntry attributeValue="3429710" value="0.9388594700169672,-0.34430058896182475,0.42456193291266686|0.9382271267406086,-0.34602002636850654,0.7567464260666928|0.99242720854106,-0.12283417988247138,0.8504969299995749"/>
                    <discreteMappingEntry attributeValue="3429711" value="0.9121067403738613,-0.4099527950442216,0.35439167048446735|0.98138819015449,-0.19203442458396525,0.6454957449422549|0.9995240619371468,-0.03084881859434296,0.8425849118970486"/>
                    <discreteMappingEntry attributeValue="3429704" value="0.9392015732734581,0.34336628366900135,0.12906212649537246|0.9841337717768689,0.1774280678140686,0.35714973824831636|0.9989030611288711,0.04682600204342544,0.6106642478635229"/>
                    <discreteMappingEntry attributeValue="3429705" value="0.9006382096396693,-0.4345696898508351,0.20912436559015063|0.9335407777556826,-0.35847122097501116,0.5243978248113454|0.9554783779662321,-0.2950611279701514,0.8891379623746456"/>
                    <discreteMappingEntry attributeValue="3429706" value="0.9895371034783395,-0.14427862225464352,0.17344212462532654|0.9998703121008202,0.01610462602510091,0.43937510533014906|0.9990535469416653,0.043497245237806126,0.7612579809080356"/>
                    <discreteMappingEntry attributeValue="3429707" value="1.0,0.0,0.25|1.0,0.0,0.5|1.0,0.0,0.75"/>
                    <discreteMappingEntry attributeValue="3429812" value="0.8598937213687872,0.5104731020832916,0.08934514672441532|0.9629613968762024,-0.2696392926230021,0.34668721379810563|0.9765860114856182,-0.2151273161888374,0.7513353961458946"/>
                    <discreteMappingEntry attributeValue="3429813" value="0.11740782271867897,-0.9930837845642528,0.2951515925908473|0.8266192826513136,-0.5627615494585853,0.2866869579710314|0.911849086204814,-0.41052557044287236,0.5382710846657383"/>
                    <discreteMappingEntry attributeValue="3429814" value="1.0,0.0,0.25|1.0,0.0,0.5|1.0,0.0,0.7500000000000001"/>
                    <discreteMappingEntry attributeValue="3429815" value="0.9785391922899791,-0.20606078994431548,0.31469680691404905|0.9937839456331431,-0.11132596014327514,0.6143435813728143|0.9934297657848458,-0.11444343778769707,0.8842747209952638"/>
                    <discreteMappingEntry attributeValue="3429808" value="0.36945384872193143,-0.9292490805293014,0.7242343493693472|0.6517000547085371,-0.7584767884997469,0.7689062740229899|0.7056167911718039,-0.7085936381427701,0.7462551751193803"/>
                    <discreteMappingEntry attributeValue="3429809" value="0.510098350204111,-0.8601160811884895,0.682050665044112|0.5811446489793461,-0.8138002807585363,0.7491446900613404|0.8453397998109154,-0.5342289985162181,0.7819899069082987"/>
                    <discreteMappingEntry attributeValue="3429810" value="0.9898023773159583,-0.14244737224560255,0.28186358294009145|0.9634256236585754,-0.2679758714475708,0.39469809555635127|0.9934352287384226,-0.1143960064925256,0.6541810591760814"/>
                    <discreteMappingEntry attributeValue="3429811" value="0.8256485510634064,-0.5641847836718902,0.56216195406265|0.843872276623963,-0.5365441088535868,0.8705414136344968|0.8933076607098507,-0.44944568450158057,1.0031814632513674"/>
                    <discreteMappingEntry attributeValue="3429820" value="0.9826165712534692,0.18564663718493746,0.22375554233751171|0.9894699817039102,0.14473823028786692,0.46079282517469433|0.9971891181816579,0.07492571374426486,0.7439650228525427"/>
                    <discreteMappingEntry attributeValue="3429821" value="0.9783628171577579,-0.20689658770297703,0.2474198663420948|0.9784389717714664,-0.20653614337155496,0.4893810170049177|0.992433827031107,-0.12278069459157938,0.7568762854596841"/>
                    <discreteMappingEntry attributeValue="3429822" value="0.9912285903799022,-0.13215854725848072,0.19309192953463347|0.9973922607792982,-0.07217117248292693,0.3981446315339082|0.9998122386978547,-0.01937749596784735,0.6918290076257948"/>
                    <discreteMappingEntry attributeValue="3429823" value="0.77845533897951,-0.6276999961879051,0.184974738915534|0.8071866540184706,-0.5902962862617941,0.3089741375151165|0.9564139155224995,-0.29201442121053045,0.523527551071749"/>
                    <discreteMappingEntry attributeValue="3429816" value="0.9849325578536381,-0.1729388807639562,0.17793159983546758|0.9976321600640731,-0.06877552766712655,0.5314924897911519|0.9995082998301855,-0.03135535951909919,0.82880978810496"/>
                    <discreteMappingEntry attributeValue="3429817" value="0.9755255204186215,0.21988624107018992,0.35938152731114165|0.9846608908636081,0.17447902453786726,0.6415999406554177|0.9917850059738769,0.1279159955806819,0.900717397092175"/>
                    <discreteMappingEntry attributeValue="3429818" value="0.9882302281870893,-0.152973906589632,0.2694271838154105|0.9985063231349062,-0.054636276040835194,0.4822082066959807|0.9989014927636084,-0.046859446802483634,0.7041848821065289"/>
                    <discreteMappingEntry attributeValue="3429819" value="0.8668282285409136,-0.4986068814252584,0.26529937361039846|0.8999486569900578,-0.43599588849184273,0.550856787382921|0.9774792984178023,-0.21103132744841677,0.8874573491420957"/>
                    <discreteMappingEntry attributeValue="3429796" value="0.9965480106244168,-0.08301844686885741,0.42775390063595825|0.999994937091442,0.00318210488244171,0.7400102688013727|0.9853096937804529,-0.17077706913479404,0.7929896741880232"/>
                    <discreteMappingEntry attributeValue="3429797" value="0.9900619209696215,0.1406321181165344,0.2624906009078563|0.9839652017783622,0.17836053848670372,0.5640538217820705|0.9988419871485797,-0.04811117031497419,0.7446567425505323"/>
                    <discreteMappingEntry attributeValue="3429798" value="0.8678701680654609,0.49679107417709173,0.5234741789795188|0.9823528403020452,0.18703715446537497,0.7252426385209902|0.9962791640661939,-0.0861848434909871,1.0569526390731234"/>
                    <discreteMappingEntry attributeValue="3429799" value="0.9869382792412326,0.16109882981683898,0.7895364728952137|0.9842716965320817,0.17666133534494097,0.8472818453936287|0.99711853645194,0.0758592398059796,1.1028537194534465"/>
                    <discreteMappingEntry attributeValue="3429792" value="0.8623775991412514,0.5062656185238842,0.2635326171524562|0.7846332066323715,0.6199602657024095,0.5063682715272819|0.9458944906567859,0.3244743634636481,0.7714651369611489"/>
                    <discreteMappingEntry attributeValue="3429793" value="0.9990772180271829,-0.04295011547207914,0.3779945438799969|0.961949432592908,0.2732275409510951,0.5072331373167659|0.9798620918591052,0.1996754389941298,0.7039061351635716"/>
                    <discreteMappingEntry attributeValue="3429794" value="0.9535743325245126,-0.3011577532630203,0.35145262646413705|0.9967399407913369,-0.08068141317107838,0.6538491751536484|0.999513028544653,-0.031204258835866593,1.1095101096578168"/>
                    <discreteMappingEntry attributeValue="3429795" value="0.9976097495458918,0.06909983799534629,0.2698988185500773|0.9984808334947758,0.05510013741886519,0.6259083039630959|0.9987712009037144,0.04955893708860344,1.1020495190240482"/>
                    <discreteMappingEntry attributeValue="3429804" value="0.8846562056735104,0.46624392517581137,0.6650231309981199|0.9385791106611068,0.3450641288668034,0.9241740250645358|0.996016881737888,0.0891648545848303,0.9801032483307542"/>
                    <discreteMappingEntry attributeValue="3429805" value="0.9987961882435958,0.049052771074257005,0.4238153850934724|0.9999837939613087,0.0056931375134457235,0.6699386574724618|0.9942934969275116,-0.10667915432576576,0.8177607313516229"/>
                    <discreteMappingEntry attributeValue="3429806" value="0.621297678681692,-0.7835746259704567,0.25209623678975795|0.8470114873400894,-0.5315745858427862,0.4320426731425503|0.9650408308957982,-0.2620995892861099,0.6460173893469957"/>
                    <discreteMappingEntry attributeValue="3429807" value="0.9999997816901678,6.60771985456594E-4,0.35609515209632064|0.9962336067092041,-0.08670986600826218,0.589422793134438|0.9806639561058338,-0.19569927234114923,0.6763813000892984"/>
                    <discreteMappingEntry attributeValue="3429800" value="0.9038278791732236,-0.42789620800987793,0.44183957243927235|0.8522843939067573,-0.5230786861486438,0.6735007417203601|0.982605118686477,-0.18570724469210773,0.6840969393262673"/>
                    <discreteMappingEntry attributeValue="3429801" value="0.9248094006743626,0.38043077218375265,0.5191592111858242|0.8322921971711549,0.5543371704369205,0.6770991645732349|0.9621416567106812,0.27254987144011955,0.7360746815685326"/>
                    <discreteMappingEntry attributeValue="3429802" value="0.9617818396589258,0.273816896670553,0.2577866989352223|0.9610323348808586,0.2764359804971944,0.5159313640353946|0.9599442397859493,0.2801911071068741,0.7746789950878149"/>
                    <discreteMappingEntry attributeValue="3429803" value="0.991749802922331,0.12818864381651648,0.2890623403120278|0.9121171520802288,0.40992962918170817,0.5699647389495389|0.9853986370753337,0.17026310830615884,0.6741607749474686"/>
                    <discreteMappingEntry attributeValue="3429780" value="0.5090193831647727,-0.860755056658138,0.08338324420909682|0.9490347606961652,-0.315171418422376,0.3695974711058008|0.9275588773973076,-0.37367703831175725,0.6012063856945434"/>
                    <discreteMappingEntry attributeValue="3429781" value="0.7403028217894969,-0.6722735544780177,0.9109425677244849|0.8140036836214714,-0.5808597103007538,0.938062500713389|0.9974545883189343,-0.07130458780124387,0.8767164955576235"/>
                    <discreteMappingEntry attributeValue="3429782" value="0.8726144965368314,-0.488409603134267,0.8056501662161812|0.9195867914987956,-0.39288692126482216,0.8375983122066903|0.9996268984388575,-0.02731417063558728,0.9067964943823003"/>
                    <discreteMappingEntry attributeValue="3429783" value="0.9998949046870789,0.014497571548968741,0.3799225305928819|0.9984889162543774,0.05495347229392235,0.5913475947087213|0.9982333162052853,0.05941587681587171,0.9235409232444"/>
                    <discreteMappingEntry attributeValue="3429776" value="0.9730222096409512,-0.23071146383619692,0.17611095431019474|0.9998947785009361,0.014506271973319497,0.40114302201450674|0.9918125137878293,0.12770253518966215,0.7185630543015187"/>
                    <discreteMappingEntry attributeValue="3429777" value="0.9519844329147529,0.3061464347138088,0.08967159597297689|0.9506159386720304,-0.31036967819472067,0.2872273097446947|0.9424871915520375,-0.33424226806367996,0.5869160247765008"/>
                    <discreteMappingEntry attributeValue="3429778" value="0.6183048664386596,-0.7859383513598706,0.11816089578087643|0.9774747260798855,-0.21105250501961073,0.4634367271193464|0.9605587003181147,-0.2780772972451621,0.7472932864887357"/>
                    <discreteMappingEntry attributeValue="3429779" value="0.863496302725265,-0.5043551676941532,0.10207903394450489|0.9306461516493186,0.3659204017546896,0.42226483025226547|0.9746471445485376,0.22374749970308497,0.6774305574887762"/>
                    <discreteMappingEntry attributeValue="3429788" value="0.5609620607526503,-0.82784151043309,0.3337939332519099|0.7281859568085727,-0.6853796118260183,0.43254467474776886|0.8898766812010909,-0.4562011532805809,0.5548008605038715"/>
                    <discreteMappingEntry attributeValue="3429789" value="0.9038212760890837,-0.42791015515958525,0.38020109115263745|0.9933427438178786,-0.11519632504714925,0.5091812169354127|0.9956094499222249,0.09360461113409303,0.681775832425674"/>
                    <discreteMappingEntry attributeValue="3429790" value="0.5564507802225894,-0.8308805745651245,0.5257928345876494|0.795624699973977,-0.6057898454012902,0.7051121732311282|0.9048855551967339,-0.42565494475725135,0.9296473551972312"/>
                    <discreteMappingEntry attributeValue="3429791" value="0.4195637258576677,-0.9077258837030218,0.06391035951192223|0.9259205701584698,0.37771827829404037,0.2954664262994048|0.9017118762436014,0.4323374749443357,0.5703120168883945"/>
                    <discreteMappingEntry attributeValue="3429784" value="0.6482166873674579,-0.7614559253288133,0.4267334281863474|0.8434128531168009,-0.5372660041333135,0.5396338143605203|0.9506490574965847,-0.31026822183532626,0.6956947808670881"/>
                    <discreteMappingEntry attributeValue="3429785" value="0.891701017062694,-0.4526248956579356,0.7021704547758251|0.9715377363548137,-0.2368848387688933,0.9097576039475268|0.9682576130350353,-0.24995438543801504,0.8709350219330901"/>
                    <discreteMappingEntry attributeValue="3429786" value="0.8047135929490918,-0.5936632322478489,0.41149618604215493|0.9553960708399472,-0.2953275263560623,0.48561055343938403|0.9918219351788214,-0.12762934183853536,0.6268387366204092"/>
                    <discreteMappingEntry attributeValue="3429787" value="0.7523983443622982,-0.6587083811527469,0.36126975934986505|0.9254172295329663,-0.37894980047960053,0.4828102097781268|0.9845325800003948,-0.17520159507768826,0.6457474809839131"/>
                    <discreteMappingEntry attributeValue="3429764" value="0.35285435173711016,0.9356782601194621,0.7609977924415093|0.6111072458189396,0.7915478091104732,0.9079295454152727|0.9206241122003659,0.39045005318899384,1.0454374111974898"/>
                    <discreteMappingEntry attributeValue="3429765" value="0.37764099530451306,0.9259520930725395,0.0933063805840176|0.9712312110330347,0.23813847802340737,0.37620691644468157|0.9853649073989683,-0.17045820387010593,0.685030493276068"/>
                    <discreteMappingEntry attributeValue="3429766" value="-0.11566678368251358,-0.9932880725915029,0.17622052924036813|0.7873064645743729,-0.6165618629459672,0.5209961598529328|0.9783102784314758,-0.20714487470205084,0.9358354849691094"/>
                    <discreteMappingEntry attributeValue="3429767" value="0.5424908945707497,-0.8400616818471295,0.3906620466845124|0.762907272676391,-0.6465079220686092,0.6380621429230304|0.886062009469373,-0.46356673238606844,0.7886573302964248"/>
                    <discreteMappingEntry attributeValue="3429760" value="0.9269329371958517,-0.375227037860375,0.5282712108407609|0.9531005391932824,-0.3026538653139496,0.5373153887294122|0.9998584667369363,-0.016823985688972556,0.766737585547996"/>
                    <discreteMappingEntry attributeValue="3429761" value="0.9442154897198863,0.3293282693195882,0.3068574121030612|0.8877537939259869,0.4603185868178869,0.494045446070558|0.9757615782417907,0.21883633708113887,0.8077865153763524"/>
                    <discreteMappingEntry attributeValue="3429762" value="0.33535400513804925,-0.9420921882904396,0.12854946091547992|0.9869674147107887,-0.16092023582850584,0.352919762235872|0.9975207525608764,-0.07037292242320825,0.7384130601751505"/>
                    <discreteMappingEntry attributeValue="3429763" value="1.0,0.0,0.25|1.0,0.0,0.5|1.0,0.0,0.75"/>
                    <discreteMappingEntry attributeValue="3429772" value="1.0,0.0,0.25|1.0,0.0,0.5|1.0,0.0,0.75"/>
                    <discreteMappingEntry attributeValue="3429773" value="-0.22908921846206712,-0.9734054293995074,0.12393858011198783|0.5261800913383676,-0.8503731601356824,0.5028465334085095|0.9104782325961237,-0.4135569948249441,0.589813299178233"/>
                    <discreteMappingEntry attributeValue="3429774" value="0.9369920728323043,0.3493506196494027,0.6982582944417094|0.9374808111991175,0.3480369644641853,0.9278192256088222|0.9969842792417976,0.07760378176811641,1.02811771547122"/>
                    <discreteMappingEntry attributeValue="3429775" value="0.6494458553938318,-0.7604078385391448,0.3504342128068518|0.9355278809062141,-0.35325286134315814,0.4903301006233343|0.982968208208646,-0.18377568296998342,0.9088846507907032"/>
                    <discreteMappingEntry attributeValue="3429768" value="0.9906152501443481,0.1366800138332249,0.3965467933168515|0.9939101243822045,0.11019375958079836,0.6692509665970552|0.9999149352103277,0.013043095618991267,0.8617334964001603"/>
                    <discreteMappingEntry attributeValue="3429769" value="1.0,0.0,0.25|1.0,0.0,0.5|1.0,0.0,0.75"/>
                    <discreteMappingEntry attributeValue="3429770" value="0.8915905828661908,-0.4528423926095328,0.5749116719035249|0.9576572028859225,-0.2879108920494518,0.6921341679288395|0.999737698415596,0.02290271526886712,0.9074531026611963"/>
                    <discreteMappingEntry attributeValue="3429771" value="0.9090350177855452,0.4167197336815639,0.169078222668279|0.9564194221314207,-0.29199638519988436,0.5061594735558667|0.9609229395146982,-0.2768160116655676,0.7478870260275935"/>
                    <discreteMappingEntry attributeValue="3429876" value="0.9431291015467984,-0.33242668036054024,0.5563777968957052|0.9490768047390491,-0.3150447884131983,0.7511642755723286|0.9930114952922782,-0.11801766908981813,0.7680283713718558"/>
                    <discreteMappingEntry attributeValue="3429877" value="0.6641915522318813,-0.7475624267870905,0.390908168952614|0.7241878176375794,-0.6896027876867378,0.6875435171498269|0.8776786753785343,-0.4792495621132913,1.150210483432925"/>
                    <discreteMappingEntry attributeValue="3429878" value="0.839514821501363,-0.5433367873423762,0.47400420847121444|0.8446340844668335,-0.5353440607281208,0.6260198931688993|0.9273219195036652,-0.3742646892348221,0.6621758384125681"/>
                    <discreteMappingEntry attributeValue="3429879" value="0.9694444861553545,-0.2453107993199253,0.3708950135593279|0.9882088478055959,-0.15311196268984523,0.366900153244695|0.9975078668254842,-0.07055533729826592,0.5320655561056474"/>
                    <discreteMappingEntry attributeValue="3429872" value="0.3987898248179945,0.9170423521417281,0.5052571840301378|0.7965108213402767,0.6046242729892984,0.8398526799495798|0.9505384793227204,0.3106068243404356,0.9613949381435271"/>
                    <discreteMappingEntry attributeValue="3429873" value="0.8845151076765168,0.466511547865645,0.403078908190432|0.9925881199047687,0.12152705140797469,0.6508817455643057|0.9997729363943316,-0.02130905097501372,0.7580889552998916"/>
                    <discreteMappingEntry attributeValue="3429874" value="0.843861750633032,-0.5365606636891623,0.373831757019668|0.8789648217613926,-0.47688661346903355,0.6607809840659721|0.9742677083705793,-0.22539394940046603,1.1106247831446103"/>
                    <discreteMappingEntry attributeValue="3429875" value="0.9883957810967743,-0.1519005592817138,0.14074629995717403|0.9991115011266766,-0.042145086503636,0.3707332955362465|0.9997159271991651,0.023834112198979844,0.6743176616952754"/>
                    <discreteMappingEntry attributeValue="3429884" value="0.6013565471347615,-0.7989807902685504,0.44643627907483036|0.7953132843629276,-0.6061986305789985,0.542463542220924|0.9645025098172111,-0.26407368016578375,0.7423447087514436"/>
                    <discreteMappingEntry attributeValue="3429885" value="0.9753843347790128,0.22051167648835004,0.23660682688359438|0.9896767410048233,0.143317648299405,0.4790168242711869|0.9974645944471038,0.07116447726552048,0.7278038996312769"/>
                    <discreteMappingEntry attributeValue="3429886" value="0.9941278395251256,0.10821200802640193,0.33610002347743256|0.9999858936597656,0.005311542288250563,0.4447943967974517|0.9997069933468647,0.024205938390645464,0.762759431353798"/>
                    <discreteMappingEntry attributeValue="3429887" value="0.9927579730800133,-0.12013162317251648,0.33545244489217907|0.9893859842382472,-0.145311300981427,0.507964958183417|0.9995658915680881,-0.02946232193316103,0.6987304764297597"/>
                    <discreteMappingEntry attributeValue="3429880" value="0.9973477098629907,-0.07278424026564893,0.42674216391384434|0.9978076322338664,-0.06618103244771327,0.5662283573269602|0.9999807307183632,0.006207913656640289,0.5862466574859849"/>
                    <discreteMappingEntry attributeValue="3429881" value="0.5360088011159477,0.8442123933739923,0.3253272944756845|0.5313420128181283,0.8471574029744295,0.4981540010612654|0.8125542948823942,0.5828855100859647,0.5527760404380341"/>
                    <discreteMappingEntry attributeValue="3429882" value="0.987709727216087,-0.156299375439325,0.21081138218066361|0.9993395651203555,-0.036337770777233595,0.5534746629130274|0.9981428412150954,-0.06091689856728397,0.7947310481655036"/>
                    <discreteMappingEntry attributeValue="3429883" value="0.8189589201213574,0.5738521474680217,0.22734815693578594|0.9585124452352769,0.2850506837899013,0.5290113686767445|0.9863027110360968,0.16494533095194225,0.7710698166797447"/>
                    <discreteMappingEntry attributeValue="3429860" value="0.6272410423936527,0.7788251888176986,0.43483767550328223|0.6599789672536026,0.7512840759545407,0.6533331437310193|0.910443882785329,0.41363261029417664,0.732737684866781"/>
                    <discreteMappingEntry attributeValue="3429861" value="0.9857271972077857,0.1683505054488498,0.17076063719901402|0.9999732181069612,0.007318679444263623,0.35057036872111774|0.9997710227919494,-0.021398644479017476,0.621388366425145"/>
                    <discreteMappingEntry attributeValue="3429862" value="0.5745686511016138,-0.8184563917346311,0.13201927144405334|0.9978434787452699,-0.06563834188595934,0.3225559959842694|0.999532750270696,-0.030566012764154948,0.6799886984961188"/>
                    <discreteMappingEntry attributeValue="3429863" value="0.8224306991339057,-0.5688653136921912,0.1311146892647117|0.7550544144001575,-0.655662131966484,0.2557331640199493|0.9776944105204962,-0.2100324728154659,0.5314934545137748"/>
                    <discreteMappingEntry attributeValue="3429856" value="0.3055770921641184,0.9521673386251609,0.7386239373429643|0.5101242000597374,0.8601007502109349,0.9841395760555056|0.8026661969450976,0.5964285173276793,0.8738255478469354"/>
                    <discreteMappingEntry attributeValue="3429857" value="0.9206034771225311,0.3904987041078438,0.5434074599371416|0.8694555195434445,0.49401123421986987,0.7186162658329415|0.9679045228193128,0.25131819414025386,0.7999262723063819"/>
                    <discreteMappingEntry attributeValue="3429858" value="0.9790822417468599,-0.20346489597948694,0.4775438798655548|0.9948311755007951,-0.10154276070555764,0.49359296573169376|0.9988970084051089,-0.04695494222468885,0.6800529970784865"/>
                    <discreteMappingEntry attributeValue="3429859" value="0.9999848896892308,0.005497307815363307,0.5117155513732785|0.9990809355617943,0.042863553247132376,0.5497891993195235|0.9993614079255853,0.03573200734624331,0.7189489671972907"/>
                    <discreteMappingEntry attributeValue="3429868" value="0.9908205266660151,-0.13518388934070713,0.22702037062327096|0.9999753953867578,0.00701488567956264,0.26383182615622847|0.9956308148966061,0.09337708727691223,0.5890299857611948"/>
                    <discreteMappingEntry attributeValue="3429869" value="0.806055539743281,0.5918398996765661,0.35530685279286817|0.8814382515660584,0.4722992787165464,0.747153174213921|0.9736981960587783,0.22784166210744025,0.9299605567071783"/>
                    <discreteMappingEntry attributeValue="3429870" value="0.9830884735038,-0.18313124600670494,0.2959295064537076|0.957033664298025,-0.289976835971936,0.6400886231537355|0.9571914393057996,-0.28945560716574775,0.9258574371107655"/>
                    <discreteMappingEntry attributeValue="3429871" value="0.5145369861707498,-0.8574681859184757,0.4126573499622457|0.6294497340767404,-0.7770412037149129,0.6467046762503145|0.8429311538924867,-0.538021439905029,0.5788096085802017"/>
                    <discreteMappingEntry attributeValue="3429864" value="0.9957708845732721,0.09187135264141469,0.3281431579531122|0.9972145981249381,-0.07458582497042093,0.5893935655430974|0.9997526244275482,-0.022241626519428806,0.7527278229545656"/>
                    <discreteMappingEntry attributeValue="3429865" value="0.9711330427491649,-0.23853849433738922,0.1618598482123841|0.9747731017794867,0.22319811837736983,0.4577077090893502|0.9990453159462253,0.04368588657572328,0.6025800712208405"/>
                    <discreteMappingEntry attributeValue="3429866" value="0.9707849603406561,0.23995116331535213,0.28883402186916773|0.9918754651030959,0.12721266338897724,0.6193707628644791|0.9941265331249464,0.10822400905979651,0.8996783286042164"/>
                    <discreteMappingEntry attributeValue="3429867" value="0.8482682559458852,0.529566771950928,0.16837809454846164|0.9997796091849258,0.020993643276882887,0.4839363913794983|0.9644725752100688,0.2641829889823684,0.8424833912983076"/>
                    <discreteMappingEntry attributeValue="3429844" value="0.8420846087310035,-0.5393454474994228,0.5371833989165341|0.965952074214528,-0.25872106663480454,0.8115954488183423|0.9533929848366698,-0.3017313647339725,0.7705001492801943"/>
                    <discreteMappingEntry attributeValue="3429845" value="0.9819876914677118,0.18894489621557403,0.5799231351437146|0.9998563026591026,-0.016952109982799994,0.7799554913105204|0.9993472536300093,0.03612570638974188,0.7433286887094123"/>
                    <discreteMappingEntry attributeValue="3429846" value="0.897979326472844,-0.440037645238879,1.0798359445968635|0.9443834801646513,-0.3288462290981935,1.071589569028112|0.9971255586023207,-0.07576688182847428,1.1318504736123565"/>
                    <discreteMappingEntry attributeValue="3429847" value="0.9346782215548962,-0.355494897503433,0.5545842426894697|0.9706848869336069,-0.2403556745298326,0.9442532407278414|0.9959071733406116,-0.09038197878290198,1.067835505683388"/>
                    <discreteMappingEntry attributeValue="3429840" value="0.9996740465584362,0.025530386551746425,0.7590706520573154|0.9964267461139827,0.08446146830774716,0.79190048290952|0.9941331592149448,0.10816312564507904,1.0606607433566375"/>
                    <discreteMappingEntry attributeValue="3429841" value="0.9264265627795949,-0.37647552878824053,0.25301914859568275|0.9956932744553458,-0.09270870080198167,0.5015411656313278|0.9997979692244059,-0.020100267031906073,0.6966096434608395"/>
                    <discreteMappingEntry attributeValue="3429842" value="0.8245415312066398,0.5658014345292965,0.42256033237525276|0.9526336147702419,0.3041203643457346,0.6316700047084672|0.9866843976980014,0.16264654727147504,0.7860163581990979"/>
                    <discreteMappingEntry attributeValue="3429843" value="0.9517578538067955,0.3068501062686513,0.3999535355459094|0.9986496617779198,-0.051950486338882114,0.7033055759792376|0.9997205859790196,0.02363789266761558,0.6400931728526473"/>
                    <discreteMappingEntry attributeValue="3429852" value="0.9826469963618296,0.18548552650024858,0.2781807112924018|0.9955151574829697,-0.09460217345102612,0.41963070724581947|0.9870912295215273,-0.1601589978792311,0.7733710285974706"/>
                    <discreteMappingEntry attributeValue="3429853" value="-0.12686041480688928,0.9919205790561177,0.4078382360119992|0.2567426791579032,0.9664797963221072,0.6590358962803611|0.7725830975597879,0.6349136613468978,0.6340767668256229"/>
                    <discreteMappingEntry attributeValue="3429854" value="0.9955937429316736,-0.09377152571703562,0.2733871370453326|0.9998382566152634,-0.01798501066306998,0.531264539248688|0.9998303931388124,-0.018416974667079773,0.7277228037723698"/>
                    <discreteMappingEntry attributeValue="3429855" value="0.960076800310766,0.27973655017720067,0.31755169746321626|0.8512807174339108,0.5247105298402217,0.4950385963003687|0.9637741862146847,0.26671954931392317,0.6611775397264458"/>
                    <discreteMappingEntry attributeValue="3429848" value="0.9910313893194939,-0.13362928340552377,0.49537286498275224|0.9941023560632485,-0.10844586515629968,0.7616715399634967|0.9932793903416204,-0.11574131813047116,0.7198116017052799"/>
                    <discreteMappingEntry attributeValue="3429849" value="1.0,0.0,0.25|1.0,0.0,0.5|1.0,0.0,0.75"/>
                    <discreteMappingEntry attributeValue="3429850" value="0.7004246083057526,-0.7137263958126623,0.5177931967234076|0.7875766990367624,-0.616216636528386,0.7856745589409737|0.9368432903464655,-0.34974940933875515,0.715007106075192"/>
                    <discreteMappingEntry attributeValue="3429851" value="0.5589115201941739,-0.8292272985100271,0.3050784740663448|0.7680764759600375,-0.6403581240812128,0.6032304053905078|0.9234894429607716,-0.3836238375544509,1.0251029731494734"/>
                    <discreteMappingEntry attributeValue="3429828" value="0.8520696202585654,-0.5234284690694845,0.4213016702028019|0.9506740846803798,-0.3101915290866628,0.5985194138941329|0.9689436432609733,-0.24728165355349713,0.7899952358227232"/>
                    <discreteMappingEntry attributeValue="3429829" value="0.5160275541863196,-0.8565719837354506,0.4043436048445165|0.8118090461185282,-0.5839230023214751,0.5078911515799879|0.8897836207784064,-0.45638263353733016,0.679599687394512"/>
                    <discreteMappingEntry attributeValue="3429830" value="0.7663659927370703,0.6424042070037561,0.24126899880036456|0.8445074642835712,0.5355437823085362,0.38039519937362654|0.8216178148062502,0.5700387411334447,0.4410680218006709"/>
                    <discreteMappingEntry attributeValue="3429831" value="0.9822620320459453,-0.1875134672522758,0.25090803713633675|0.9766672366248487,-0.21475825689267888,0.5158605833733736|0.9786353227598092,-0.20560375737520942,0.7455190510396382"/>
                    <discreteMappingEntry attributeValue="3429824" value="0.8998152163838453,0.43627121881244196,0.32255131774786666|0.9533550198953644,0.30185129789402815,0.5542548415198518|0.9856786345560953,0.1686346031502182,0.7761587779089397"/>
                    <discreteMappingEntry attributeValue="3429825" value="0.9538210477274142,0.3003754465867307,0.34924476882464506|0.948288538928728,0.31740958860188573,0.5720483811968655|0.9937416310118232,0.11170304737992326,0.7764587925408208"/>
                    <discreteMappingEntry attributeValue="3429826" value="0.9627266733967893,-0.2704761585248352,0.4171150436317483|0.9991934856635805,-0.04015442948747035,0.5941620191878876|0.9990944224895624,0.04254803109719466,0.7858162018053902"/>
                    <discreteMappingEntry attributeValue="3429827" value="0.999801907238011,-0.019903423907349928,0.42041402155664437|0.9768715216306308,0.21382710358384394,0.5986769366911304|0.9628903136181157,0.26989302314140456,0.7908167492385885"/>
                    <discreteMappingEntry attributeValue="3429836" value="0.9023397497789053,-0.431025493409546,0.29595274205357375|0.9498995940301544,-0.312555213140571,0.5185451054707855|0.9844181272687034,-0.17584354041243294,0.7327478002375176"/>
                    <discreteMappingEntry attributeValue="3429837" value="0.5480132326447743,0.836469662836749,0.3904828282707111|0.7727324204504444,0.6347319169419461,0.6395189302169072|0.9497559298050912,0.31299149157775324,0.6891903552018603"/>
                    <discreteMappingEntry attributeValue="3429838" value="0.9832941107407002,0.18202387695754554,0.5164326713249303|0.9783363632757561,0.20702164208692708,0.8287622239042416|0.958570592608289,0.28485508418596567,0.8725059276631636"/>
                    <discreteMappingEntry attributeValue="3429839" value="0.9917556329975901,0.12814353053334157,0.6700536185449837|0.9883195006718313,0.1523960780065619,0.8842409722919194|0.9808951638011568,0.19453708549143459,0.9226584522077182"/>
                    <discreteMappingEntry attributeValue="3429832" value="0.5578305157070622,0.8299548877776388,0.3590458220379935|0.8423090682214422,0.5389948363314121,0.5212678686321971|0.9696702067223036,0.24441704153991578,0.6603738425871861"/>
                    <discreteMappingEntry attributeValue="3429833" value="0.9934517049067038,0.1142528337415033,0.2973392122832613|0.9929435091384128,0.11858831164956675,0.567296422501901|0.994803279575109,0.10181569106285941,0.8071735277606968"/>
                    <discreteMappingEntry attributeValue="3429834" value="0.8773002944201869,0.47994186461513594,0.12051533252535426|0.9906141151740587,0.13668823950112427,0.4155718856692136|0.9993198391484083,0.03687626722431943,0.8346453428756737"/>
                    <discreteMappingEntry attributeValue="3429835" value="0.9989674754182395,0.045431080292120236,0.3111349193716883|0.9730073045682703,-0.23077431671828041,0.5135915247243814|0.9993075218231513,0.0372085585271989,0.6735029944601894"/>
                    <discreteMappingEntry attributeValue="3429940" value="0.990468460048125,0.13773971703868026,0.3194157288402756|0.9977539259093422,0.06698584426947889,0.48116327556224564|0.9990554624160288,0.04345322792031462,0.6599542520795895"/>
                    <discreteMappingEntry attributeValue="3429941" value="0.9597668467367579,-0.2807981479728465,0.30142771925695927|0.9565124481566708,-0.2916915091690743,0.48804542714247356|0.9840221088209098,-0.17804631237868862,0.6151153156633642"/>
                    <discreteMappingEntry attributeValue="3429942" value="0.936039538283115,0.3518948461838179,0.22113536969293898|0.9568793283044563,0.2904857157651861,0.438039442882845|0.9865993592960872,0.16316158934182456,0.691172598375241"/>
                    <discreteMappingEntry attributeValue="3429943" value="1.0,0.0,0.25|1.0,0.0,0.5|1.0,0.0,0.7500000000000001"/>
                    <discreteMappingEntry attributeValue="3429936" value="0.9374473052426772,0.3481272036098915,0.39797530424144567|0.9521277930978526,0.30570028722690606,0.604464672397553|0.9974387537299343,0.07152574751567083,0.8305688478811429"/>
                    <discreteMappingEntry attributeValue="3429937" value="1.0,0.0,0.25|1.0,0.0,0.5|1.0,0.0,0.75"/>
                    <discreteMappingEntry attributeValue="3429938" value="0.7603470340367948,0.6495170419869283,0.1309513352074611|0.9087705910178453,0.4172960734311745,0.27239810755475463|0.9862939185403355,0.16499789771494044,0.5142682981649652"/>
                    <discreteMappingEntry attributeValue="3429939" value="0.6248011305547633,0.7807839312239269,0.4658911094535505|0.8524896336394552,0.5227441291274991,0.64230827204515|0.9566055008863641,0.29138619678006106,0.8399194964092733"/>
                    <discreteMappingEntry attributeValue="3429948" value="0.9629141364650031,0.2698080165522465,0.28234465855364754|0.8496069087715492,0.5274164394173284,0.5842231155914662|0.9826612090920035,0.18541021586159107,0.5490847404461021"/>
                    <discreteMappingEntry attributeValue="3429949" value="0.9127374351545883,-0.4085466613098482,0.3770413164515235|0.8578123966223987,-0.5139629288197121,0.6649066014272327|0.9541074043731845,-0.2994646238210192,0.7454678707214288"/>
                    <discreteMappingEntry attributeValue="3429950" value="1.0,0.0,0.25|1.0,0.0,0.5|1.0,0.0,0.7500000000000001"/>
                    <discreteMappingEntry attributeValue="3429951" value="0.8311789306711725,-0.556005022646672,0.2660990587832508|0.9585902267173593,-0.28478900477715385,0.5017585947452996|0.9915398030101925,-0.12980300091488112,0.761132672945262"/>
                    <discreteMappingEntry attributeValue="3429944" value="0.99236341449885,-0.12334850450728453,0.32140224752455676|0.9974604358743195,-0.07122274120961983,0.5061555575122373|0.9992832751689688,-0.03785414069265177,0.6696041161133961"/>
                    <discreteMappingEntry attributeValue="3429945" value="1.0,0.0,0.25|1.0,0.0,0.5|1.0,0.0,0.75"/>
                    <discreteMappingEntry attributeValue="3429946" value="0.6617421044844615,0.749731543389016,0.2558252747527656|0.5321940624689807,0.8466223950928552,0.34753575988410024|0.8793316065292033,0.4762099597433578,0.6526474704925753"/>
                    <discreteMappingEntry attributeValue="3429947" value="0.9010968978742746,0.43361778174027776,0.3360777646138992|0.9604743100955293,0.27836863984026117,0.6083993773077171|0.9868732522055617,0.16149669990813403,0.7314260946095598"/>
                    <discreteMappingEntry attributeValue="3429924" value="0.8942922495634184,0.4474833766418599,0.4857547646504793|0.8855602905156056,0.4645244577650527,0.7231568072687511|0.9436724717362182,0.3308810452220806,0.9187125332777609"/>
                    <discreteMappingEntry attributeValue="3429925" value="0.692593009210211,-0.7213285822654919,0.3913958298169154|0.7202366747065785,-0.6937284284268667,0.39414190329646964|0.9539691576042078,-0.29990472877218566,0.6923069876375584"/>
                    <discreteMappingEntry attributeValue="3429926" value="0.760970425618728,0.6487865683979994,0.3500655281676855|0.8530699226335386,0.5217966146862285,0.4561430153398392|0.9633690668383658,0.2681791212212024,0.6100708267887661"/>
                    <discreteMappingEntry attributeValue="3429927" value="0.7648823611511011,-0.644169988124188,0.33761256284255986|0.9326066568296942,-0.3608944771494029,0.39049973929686016|0.9847235974133454,-0.17412477335899026,0.5759179096021148"/>
                    <discreteMappingEntry attributeValue="3429920" value="1.0,0.0,0.25|1.0,0.0,0.5|1.0,0.0,0.75"/>
                    <discreteMappingEntry attributeValue="3429921" value="0.9972237335981073,0.07446358270088163,0.2410779767945576|0.9978194789197598,-0.06600217790572617,0.49895880217068617|0.9973405995468066,-0.07288160601699345,0.7893873025025205"/>
                    <discreteMappingEntry attributeValue="3429922" value="0.985004200984625,0.17253035687275556,0.24977734499527862|0.9857829997012182,0.16802344330499855,0.49791975032428937|0.9968959820204198,0.07872992462553709,0.7108025115792674"/>
                    <discreteMappingEntry attributeValue="3429923" value="0.8562511812320627,-0.5165596912639403,0.3262469125908279|0.9072304988746194,-0.4206338335318609,0.5694653200975874|0.9776795270486848,-0.21010174294817277,0.8283493612915787"/>
                    <discreteMappingEntry attributeValue="3429932" value="0.9816765007724566,-0.1905551044478867,0.3270103070671012|0.9320619655112005,-0.3622988993185016,0.5357875175722364|0.9962137141186147,-0.08693811478284434,0.7159621711434326"/>
                    <discreteMappingEntry attributeValue="3429933" value="0.9928022806695036,0.11976490094110293,0.28714749279992496|0.9952421981726451,0.09743185811879672,0.5897289050468715|0.9980171682428547,0.06294229017531436,0.861133312909593"/>
                    <discreteMappingEntry attributeValue="3429934" value="0.961299969500684,-0.27550384505117903,0.2237471047740107|0.9807601294812931,-0.19521672167065302,0.44378187197677715|0.9934695905628249,-0.11409720691994626,0.679937498486652"/>
                    <discreteMappingEntry attributeValue="3429935" value="1.0,0.0,0.25|1.0,0.0,0.5|1.0,0.0,0.7500000000000001"/>
                    <discreteMappingEntry attributeValue="3429928" value="0.6535069356850775,-0.756920527540045,0.3512893530957328|0.7482053429268706,-0.663467229647165,0.6055707057638889|0.9516439728411571,-0.30720310700756115,0.8784142996267691"/>
                    <discreteMappingEntry attributeValue="3429929" value="0.9410009905212449,-0.33840380588586183,0.2041542089868101|0.9847531332177254,-0.17395765754307219,0.44319960512402645|0.9923805782306144,-0.12321034027495968,0.6445483191549793"/>
                    <discreteMappingEntry attributeValue="3429930" value="0.9887839002324728,-0.14935326792895884,0.3212094157834831|0.9901467350388446,-0.1400337212671147,0.46783683945094295|0.9978496405433412,-0.06554460212347522,0.6260672239707202"/>
                    <discreteMappingEntry attributeValue="3429931" value="0.9097896642948242,-0.41506959264960747,0.2842080908660569|0.9685129000431562,-0.2489633757201959,0.5290919183892682|0.9928574024069201,-0.11930707642794333,0.7833909016533603"/>
                    <discreteMappingEntry attributeValue="3429908" value="0.9989294256704434,-0.04626016136718596,0.3567709031596565|0.9999880262015756,0.004893613539811205,0.553626662712403|0.9827994494134756,0.18467604672119542,0.7153133539245086"/>
                    <discreteMappingEntry attributeValue="3429909" value="0.8160744823070681,-0.5779467443694538,0.42681327461552204|0.8425652049829322,-0.5385943513926501,0.661751152229918|0.9310875264928857,-0.3647958579937001,0.8434035619805132"/>
                    <discreteMappingEntry attributeValue="3429910" value="0.9999999999999999,1.4901161193847656E-8,0.25|0.9999999999999999,1.4901161193847656E-8,0.5|1.0,0.0,0.7499999999999999"/>
                    <discreteMappingEntry attributeValue="3429911" value="0.8986900680913076,0.43858426956976115,0.30015167366081247|0.7962426834076488,0.6049773459558521,0.5218864344350926|0.9490431111339324,0.3151462727198697,0.6368456907278014"/>
                    <discreteMappingEntry attributeValue="3429904" value="0.7950190528479019,-0.6065844587597221,0.2996002072410762|0.932604366657591,-0.3609003952494282,0.5139826868212934|0.9938162910483439,-0.11103683914320239,0.733785647512603"/>
                    <discreteMappingEntry attributeValue="3429905" value="0.9996283719354065,0.02726019115429155,0.2301703288128745|0.9674366612221708,0.2531132286612037,0.4043160565890761|0.9744320669405918,0.22468232444472797,0.6022133181375113"/>
                    <discreteMappingEntry attributeValue="3429906" value="0.9054951591348962,-0.424356591539791,0.2851739818806376|0.9693198346277998,-0.24580288484298723,0.6006513323789284|0.9959325846534797,-0.09010153619911013,0.7916144787560618"/>
                    <discreteMappingEntry attributeValue="3429907" value="0.9539980619256523,-0.2998127713125298,0.3818512514033969|0.965466617521581,-0.2605267941142277,0.5984199646698266|0.9989060956779449,-0.04676122343827701,0.7607168191241692"/>
                    <discreteMappingEntry attributeValue="3429916" value="0.9272413102824236,-0.3744643541189658,0.34880930612969185|0.9833568506158026,-0.1816846288131446,0.5979875147423575|0.9713377898437107,-0.23770338243604228,0.7284734887102662"/>
                    <discreteMappingEntry attributeValue="3429917" value="0.6112961602560835,-0.791401923459988,0.5742895080983069|0.835824770481781,-0.5489963142399755,0.6192487236437696|0.862616955423925,-0.5058576758488084,0.6045832281191262"/>
                    <discreteMappingEntry attributeValue="3429918" value="0.8523761422780792,0.5229291654470418,0.43651665293716047|0.80928095842204,0.5874217652892207,0.687014694991295|0.8154378834034344,0.578844589082879,0.7353158356354608"/>
                    <discreteMappingEntry attributeValue="3429919" value="0.9903943120510147,0.13827185779108248,0.2823539457822317|0.9988702768339529,0.047520206835222005,0.3839636559606208|0.9967685172857876,0.08032759767285758,0.6390480768769153"/>
                    <discreteMappingEntry attributeValue="3429912" value="0.7414572807708855,-0.671000075105692,0.1483778289254646|0.739834586227587,-0.6727888116054362,0.3977575683130551|0.9990051794849839,-0.04459429741766416,0.6198689934459648"/>
                    <discreteMappingEntry attributeValue="3429913" value="0.9062880085426787,0.4226606742668942,0.23495044648574917|0.9923309389675186,0.12360949626886662,0.38713491490952406|0.9993162839076021,-0.036972485946996356,0.5400633577979638"/>
                    <discreteMappingEntry attributeValue="3429914" value="0.9682283871740617,-0.25006757140884,0.41229676912183455|0.9833892098113438,-0.18150939927899276,0.7048513327635554|0.9898442100234214,-0.14215639233994673,0.8533170078192698"/>
                    <discreteMappingEntry attributeValue="3429915" value="0.9985287305046266,0.05422521882684002,0.3980873259923539|0.9884554332104852,0.1515119023597551,0.6187787796520327|0.9841520142491796,0.17732685315338598,0.8147527852958898"/>
                    <discreteMappingEntry attributeValue="3429892" value="1.0,0.0,0.25|1.0,0.0,0.5|1.0,0.0,0.75"/>
                    <discreteMappingEntry attributeValue="3429893" value="0.8957992245850578,0.4444589398727504,0.2538338438294883|0.9652741646859289,0.2612389461582677,0.6495703828111835|0.9779313167877854,0.20892663699420433,0.93224460914507"/>
                    <discreteMappingEntry attributeValue="3429894" value="0.9049615879991147,-0.42549327168137513,0.3116362638275058|0.9351402594420765,-0.3542777091077082,0.49412316593725414|0.9684527256607788,-0.24919734781937056,0.6783282348817561"/>
                    <discreteMappingEntry attributeValue="3429895" value="0.645036843879623,0.7641514706115633,0.3333260438950564|0.9548837178626761,0.2969799410073905,0.8639017133203499|0.9979319396091016,-0.06427942056378776,0.9835730586650535"/>
                    <discreteMappingEntry attributeValue="3429888" value="0.9797260424749742,-0.2003419119813053,0.4446575965372702|0.9952708545082101,-0.09713869551572817,0.5604871727588286|0.9999981901425595,0.0019025539691053515,0.7242952461212909"/>
                    <discreteMappingEntry attributeValue="3429889" value="0.9989322513737962,-0.04619910351163681,0.3386176481917911|0.9969243638421638,0.07836971850081563,0.7265936536356801|0.9985452026907673,0.053921036555823504,0.8368949893769185"/>
                    <discreteMappingEntry attributeValue="3429890" value="0.9883895641968917,0.15194100627111318,0.20580155299561426|0.9637510734603902,0.266803051714079,0.4708028587833879|0.9853947340073764,0.17028569578955202,0.7746914610147124"/>
                    <discreteMappingEntry attributeValue="3429891" value="0.7981803185868488,-0.6024186077974323,0.22388173955767218|0.8834255421672672,-0.46857156491454965,0.5106021886598879|0.9882286651448597,-0.15298400369322498,0.6871453404187052"/>
                    <discreteMappingEntry attributeValue="3429900" value="0.9848357396413956,-0.1734893827442627,0.32408370995392954|0.9637637048824712,-0.26675742004902686,0.6589300787582895|0.997574691161008,0.06960413461152577,0.7923778810245213"/>
                    <discreteMappingEntry attributeValue="3429901" value="0.9987053394056415,-0.05086890054505134,0.3554579009827364|0.9999980547297853,0.001972444332623383,0.6244990964688587|0.9888084953599473,0.1491903465509651,0.8558458024375469"/>
                    <discreteMappingEntry attributeValue="3429902" value="0.9947052582493916,-0.10276891169517738,0.2804666904637526|0.9987202283940833,-0.050575739208341595,0.5465858457185481|0.9997947067417348,-0.0202618945611852,0.7846822827015442"/>
                    <discreteMappingEntry attributeValue="3429903" value="0.6924532759312994,0.721462722981591,0.2601097907158082|0.907690872650437,0.4196394639533896,0.5173187339532569|0.9862655336474272,0.1651674820875939,0.753814301847889"/>
                    <discreteMappingEntry attributeValue="3429896" value="0.9677328307852503,0.25197850745721573,0.2714278463358397|0.9969175181663321,0.0784567522465777,0.5217874424903618|0.9958568867961951,0.09093437755101337,0.7476644053856326"/>
                    <discreteMappingEntry attributeValue="3429897" value="0.4299258889856822,0.902864181358343,0.05244383111493842|0.9176827081640904,0.39731404095075845,0.2753231324836525|0.9254823565546193,0.3787907175553653,0.8121793042753843"/>
                    <discreteMappingEntry attributeValue="3429898" value="0.8631873240961734,-0.5048837920944658,0.3470799547770227|0.9204393349091146,-0.3908854445385078,0.6897551839438073|0.9926739078822874,-0.12082430471435801,0.7923377034651511"/>
                    <discreteMappingEntry attributeValue="3429899" value="1.0,0.0,0.25|1.0,0.0,0.5|1.0,0.0,0.7499999999999999"/>
                    <discreteMappingEntry attributeValue="3430004" value="0.9340881897944543,0.35704236959570995,0.2669987140113456|0.9291632032674013,0.3696697738439834,0.5267832283169833|0.9684796834695407,0.2490925585133731,0.6398627809591649"/>
                    <discreteMappingEntry attributeValue="3430005" value="0.9394790531442752,-0.3426063465599203,0.4778402295524424|0.977928980299352,-0.20893757319034198,0.6289498947263855|0.9946730548617264,-0.10308013354687215,0.7982039603262191"/>
                    <discreteMappingEntry attributeValue="3430006" value="0.6816867972661427,0.7316441146028778,0.36300425976177664|0.6749690790605325,0.7378460153122578,0.7090959621379671|0.9374055594432829,0.34823959729592197,0.703899069875655"/>
                    <discreteMappingEntry attributeValue="3430007" value="0.9701201078556433,0.24262517662879718,0.4436607803841899|0.9836521737335489,0.18007887468902128,0.6704761959382453|0.9941516360300444,0.10799316913020977,0.8370403787305556"/>
                    <discreteMappingEntry attributeValue="3430000" value="0.3626928653339571,0.9319087323530368,0.577119399943698|0.704611007006256,0.7095937773160288,0.7941294298849125|0.8617436453042742,0.507343956086698,1.0305407576177943"/>
                    <discreteMappingEntry attributeValue="3430001" value="0.7982798366455405,0.6022867277345311,0.3780336665078481|0.9703153960463321,0.2418429907924761,0.5191620989641409|0.9998923465502034,-0.014672944841711064,0.6716112019882197"/>
                    <discreteMappingEntry attributeValue="3430002" value="0.9924088356103483,0.12298253129006839,0.40487137275121715|0.982467908097454,0.18643178258712406,0.5485779265733451|0.9967237558182932,0.08088111391094606,0.6343659030470898"/>
                    <discreteMappingEntry attributeValue="3430003" value="1.0,0.0,0.25|1.0,0.0,0.5|1.0,0.0,0.7500000000000001"/>
                    <discreteMappingEntry attributeValue="3430012" value="0.5543384313645627,0.832291357345657,0.16871324931663811|0.7401775733212963,0.6724114513838957,0.347846943513236|0.8924785122544342,0.4510899080716745,0.6511296539417093"/>
                    <discreteMappingEntry attributeValue="3430013" value="0.8197987033244677,-0.5726518017325374,0.27615111857086294|0.9379688187896885,-0.3467196201230563,0.5011237913150927|0.9814796301169738,-0.19156653065044602,0.7052051426081294"/>
                    <discreteMappingEntry attributeValue="3430014" value="0.9338263631982731,0.35772660426069375,0.3697641452076413|0.9620112440684521,0.273009828185487,0.5559489282495658|0.9687331273732513,0.2481050743730164,0.7649211537725301"/>
                    <discreteMappingEntry attributeValue="3430015" value="0.9639420476023433,0.2661122486173867,0.21800620325005657|0.9662044880192873,0.25777681690056414,0.43946954244309466|0.9665178117620231,0.25659953146245307,0.680984442117422"/>
                    <discreteMappingEntry attributeValue="3430008" value="0.6943829605656009,-0.7196056587299402,0.3340274891941522|0.8181395350810307,-0.5750197397806401,0.5984447328731847|0.9285888064059598,-0.3711102647698592,0.8262153725881214"/>
                    <discreteMappingEntry attributeValue="3430009" value="0.9992065427532519,-0.03982819251602702,0.2518887016074452|0.9998123045791368,-0.019374096421648102,0.5016830726489571|0.999986703800755,0.005156764654411265,0.7363142714294061"/>
                    <discreteMappingEntry attributeValue="3430010" value="0.9739818391978747,0.22662607288819459,0.12542226124824166|0.9995203553078225,0.03096868297690981,0.40448936523335843|0.9983101950979153,-0.058109847388908994,0.7035378068396624"/>
                    <discreteMappingEntry attributeValue="3430011" value="1.0,0.0,0.25|1.0,0.0,0.5|1.0,0.0,0.75"/>
                    <discreteMappingEntry attributeValue="3429988" value="0.9999660569715129,0.008239229626918573,0.2953087533253685|0.9991645340760429,0.04086849452333829,0.4849980932738882|0.9999404804426189,0.010910342441215462,0.6855463921491152"/>
                    <discreteMappingEntry attributeValue="3429989" value="0.8239303445422943,0.5666910863445941,0.24657242140410263|0.9251150385179219,0.3796869309154371,0.4267629872540856|0.9788459210789181,0.204598784911261,0.6739083703275147"/>
                    <discreteMappingEntry attributeValue="3429990" value="0.817014610920777,-0.576616966054565,0.23377286980893278|0.8839535115783516,-0.4675747954801468,0.4619400448430557|0.979229595083453,-0.20275453166994006,0.6670918661484092"/>
                    <discreteMappingEntry attributeValue="3429991" value="0.9662589314225966,0.2575726643998968,0.41020298028465396|0.9624543530434261,0.2714435821819336,0.8294308831357928|0.9973948507605231,0.07213537049460385,0.9626518341338897"/>
                    <discreteMappingEntry attributeValue="3429984" value="0.977109686446136,0.21273612916741172,0.43843425064103875|0.9665767963346434,0.2563772548169147,0.840372568406693|0.9972295415563042,0.07438576105279437,0.9239963402144836"/>
                    <discreteMappingEntry attributeValue="3429985" value="0.7692058778850293,-0.6390010308498113,0.18306368446998234|0.8266436576442958,-0.5627257442808711,0.3932867063175425|0.9811083815499694,-0.1934588939604476,0.5977177153822023"/>
                    <discreteMappingEntry attributeValue="3429986" value="0.9964657408791521,0.08400016222700143,0.3285078322727489|0.95623278450019,-0.29260700922399857,0.6384003342215105|0.9780829327943614,-0.20821569723817815,0.825336932080057"/>
                    <discreteMappingEntry attributeValue="3429987" value="1.0,0.0,0.25|1.0,0.0,0.5|1.0,0.0,0.75"/>
                    <discreteMappingEntry attributeValue="3429996" value="0.9395807290956651,-0.34232740689588137,0.11385402677507807|0.9451108677321398,0.32674982432222016,0.26640291445932257|0.9997775034791594,-0.021093684765337527,0.5917894846486806"/>
                    <discreteMappingEntry attributeValue="3429997" value="0.6958875153881443,0.7181507960915418,0.17408055275193052|0.42547306041507404,0.9049710906217009,0.18723334434138697|0.9151300210081187,0.40315883302946526,0.540262661995054"/>
                    <discreteMappingEntry attributeValue="3429998" value="0.9999999999999999,1.4901161193847656E-8,0.25|0.9999999999999999,1.4901161193847656E-8,0.5|0.9999999999999998,2.1073424255447017E-8,0.75"/>
                    <discreteMappingEntry attributeValue="3429999" value="0.6084104021164052,0.7936225693593613,0.46110636850894315|0.8756976043119922,0.48285992358264485,0.6303426615278243|0.9690556643015816,0.24684229679092748,0.816691527311846"/>
                    <discreteMappingEntry attributeValue="3429992" value="0.9999999999999999,1.4901161193847656E-8,0.25|0.9999999999999999,1.4901161193847656E-8,0.5|1.0,0.0,0.75"/>
                    <discreteMappingEntry attributeValue="3429993" value="0.8567235835954774,-0.5157758246673869,0.07560108886629026|0.970672108511998,-0.24040727475863102,0.2640979496177837|0.9966439492845695,-0.08185864862344451,0.47870810541097136"/>
                    <discreteMappingEntry attributeValue="3429994" value="0.9999999999999999,1.4901161193847656E-8,0.25|0.9999999999999999,1.4901161193847656E-8,0.5|1.0,0.0,0.7499999999999999"/>
                    <discreteMappingEntry attributeValue="3429995" value="-0.1803659229243977,-0.9835995800363226,0.10810511866586271|0.11848425316577411,-0.9929559314248285,0.37717441671764623|0.9910842163692521,-0.1332369170453347,0.375461404044219"/>
                    <discreteMappingEntry attributeValue="3429972" value="0.9999999999999998,2.1073424255447017E-8,0.25|0.9999999999999998,2.1073424255447017E-8,0.5|0.9999999999999999,1.4901161193847656E-8,0.75"/>
                    <discreteMappingEntry attributeValue="3429973" value="0.825892883600405,-0.5638270522227607,0.3017689342330727|0.9003927246115891,-0.4350780866310311,0.5375739886592288|0.9826880574287749,-0.18526786496006506,0.6949134623387488"/>
                    <discreteMappingEntry attributeValue="3429974" value="0.9735509144077952,0.22847016666459075,0.3674171402655531|0.981534070252002,0.19128739878658496,0.7606462991218457|0.9920204714431751,0.1260768981124642,0.9405511025024097"/>
                    <discreteMappingEntry attributeValue="3429975" value="0.9657364299469029,0.259524850204004,0.25179313536322684|0.9756578004784342,0.2192985553203301,0.5178615329221444|0.9720614057088892,0.23472669965570234,0.7457015408460314"/>
                    <discreteMappingEntry attributeValue="3429968" value="0.971627938020213,-0.23651458741183215,0.29725010249908723|0.9996855086869415,0.025077554133746828,0.4980960930342574|0.9846189813122112,0.17471537322085767,0.7190913836181565"/>
                    <discreteMappingEntry attributeValue="3429969" value="0.8598576304392694,0.51053389248449,0.1954243420971008|0.895213033057252,0.44563844699984706,0.3413840151139216|0.9161495765931449,0.400836566830175,0.4616347449357589"/>
                    <discreteMappingEntry attributeValue="3429970" value="0.16762237378336434,-0.9858512767183649,0.1608820715740129|0.699436710456647,-0.714694541790816,0.277186405781257|0.9703806675237842,-0.24158095971349866,0.5774865002460972"/>
                    <discreteMappingEntry attributeValue="3429971" value="0.9379018513437808,-0.3469007311118103,0.37745900529197396|0.9120206213000757,-0.4101443481549197,0.5786266467728436|0.9722643948249556,-0.23388447266901405,0.7832315049836377"/>
                    <discreteMappingEntry attributeValue="3429980" value="1.0,0.0,0.25|1.0,0.0,0.5|1.0,0.0,0.75"/>
                    <discreteMappingEntry attributeValue="3429981" value="0.9985856471681589,0.05316676847194374,0.44086060006172956|0.9920194966831075,-0.12608456765438839,0.7764575454226547|0.9999710238116108,0.007612590699545683,0.8859667802823763"/>
                    <discreteMappingEntry attributeValue="3429982" value="0.8223353888993399,-0.5690030827366153,0.5462910180400181|0.9591136514397578,-0.2830212070179456,0.8741569057170684|0.9999167210844793,0.012905459916783251,0.9097716264442544"/>
                    <discreteMappingEntry attributeValue="3429983" value="1.0,0.0,0.25|1.0,0.0,0.5|1.0,0.0,0.75"/>
                    <discreteMappingEntry attributeValue="3429976" value="0.9669826741843809,-0.25484212333761364,0.4058772513861724|0.9761568472196832,-0.2170663714768551,0.7977201698271578|0.9910210723505333,-0.13370577458434285,0.9184207583131323"/>
                    <discreteMappingEntry attributeValue="3429977" value="0.6948736765291866,-0.7191318193953118,0.22315597893681824|0.9998025669383116,0.019870257762871494,0.5160572331902413|0.9908841243406274,0.13471693334435714,0.9482656629378269"/>
                    <discreteMappingEntry attributeValue="3429978" value="0.9404931643568848,-0.3398126068849914,0.5388644005998264|0.9927184328964569,-0.12045793036410186,0.9510277910384254|0.9970808875362697,-0.07635249642208669,0.902981606117246"/>
                    <discreteMappingEntry attributeValue="3429979" value="0.9987706319842425,0.049570401307602416,0.5683035023526741|0.9969446061288701,0.07811179367132703,0.7609087626308612|0.9967768065910804,0.08022467103134773,0.9189720089052764"/>
                    <discreteMappingEntry attributeValue="3429956" value="0.7293260573140683,0.6841662825093885,0.47406232260408204|0.8380828669556295,0.5455429480026597,0.6683202716322869|0.9565780113341814,0.2914764282612622,0.7831096011540739"/>
                    <discreteMappingEntry attributeValue="3429957" value="0.9160965474042054,0.4009577481906222,0.3153951261005068|0.9721408433291953,0.23439748448138484,0.44273975299691715|0.9919260393760616,0.12681771330425368,0.6566644444608124"/>
                    <discreteMappingEntry attributeValue="3429958" value="1.0,0.0,0.25|1.0,0.0,0.5|1.0,0.0,0.7499999999999999"/>
                    <discreteMappingEntry attributeValue="3429959" value="0.8132651585439746,0.5818932736322391,0.2618213946869036|0.8883208685937388,0.45922329472802814,0.5421960712805112|0.9748285362641825,0.2229558810281338,0.7028810931420822"/>
                    <discreteMappingEntry attributeValue="3429952" value="0.9950050681119121,0.09982441801287442,0.4801932947243372|0.998035901047358,-0.06264455459645572,0.6790261179714825|0.9942838991848489,-0.10676857132027734,0.8262963903581885"/>
                    <discreteMappingEntry attributeValue="3429953" value="0.8592427742894665,-0.5115680353885893,0.3410022464733198|0.9406733125508281,-0.3393135998669256,0.5911785469318035|0.9776301264342702,-0.21033149048136596,0.8241288359665752"/>
                    <discreteMappingEntry attributeValue="3429954" value="0.7465364420168968,-0.6653445278506109,0.274730434580661|0.9123239456329686,-0.4094691908125594,0.5666502066407899|0.9362042334769568,-0.35145644569394907,0.7396266689263823"/>
                    <discreteMappingEntry attributeValue="3429955" value="0.9789333185254782,-0.20418020932669925,0.30745628417645404|0.9999598196481085,0.00896432313798673,0.541821124664479|0.9929431552043323,0.11859127511273866,0.75425194042106"/>
                    <discreteMappingEntry attributeValue="3429964" value="0.918655740128433,-0.39505902233600615,0.27589376004048005|0.9279445731647317,-0.37271821679939926,0.5474776183262051|0.9974279846680928,-0.07167576578556276,0.6858753137673569"/>
                    <discreteMappingEntry attributeValue="3429965" value="0.44367410213147734,-0.8961882007133476,0.41725487550386764|0.6693020458066674,-0.7429904248905296,0.6895286652028847|0.8444895149075605,-0.5355720859148589,0.7047719772505803"/>
                    <discreteMappingEntry attributeValue="3429966" value="0.8349137015741255,0.5503808780506388,0.40445601962562494|0.69008984169271,0.7237237113654149,0.6731696606351519|0.8777729716923955,0.47907683117251765,0.7333217885323311"/>
                    <discreteMappingEntry attributeValue="3429967" value="0.8033176366560605,-0.595550816167119,0.31091604098986797|0.9317413686539773,-0.36312259904722705,0.5199848802277985|0.9764393605692822,-0.2157919718873976,0.7481629329960475"/>
                    <discreteMappingEntry attributeValue="3429960" value="0.9856823357226598,-0.16861296819735333,0.24293897752704327|0.9864414664034994,-0.1641134770812982,0.4874879021979968|0.996438705731216,-0.08432025688231276,0.7724230401251936"/>
                    <discreteMappingEntry attributeValue="3429961" value="0.9999813618761926,0.006105399269105092,0.2707546459497704|0.9996719390096813,-0.02561277721419506,0.47794246144727937|0.9999794082596548,0.006417402642082398,0.6832736053319782"/>
                    <discreteMappingEntry attributeValue="3429962" value="0.9933776467575082,0.11489495603600411,0.6089594855467672|0.9420584800557072,0.33544868483142193,1.0238758662901468|0.9896230886642667,0.14368765563748634,0.9928341312135865"/>
                    <discreteMappingEntry attributeValue="3429963" value="0.8479296743734288,-0.5301087315985004,0.5104469387391956|0.9560820053125456,-0.29309929907378063,0.8398570143749464|0.9995330380631441,-0.030556600273285574,0.8616638097703233"/>
                    <discreteMappingEntry attributeValue="3430068" value="0.9999999999999998,2.1073424255447017E-8,0.25|0.9999999999999998,2.1073424255447017E-8,0.5|1.0,0.0,0.75"/>
                    <discreteMappingEntry attributeValue="3430069" value="0.845369861174145,0.5341814278111948,0.14985964183895306|0.9534911579556195,0.30142098749166746,0.349190344294175|0.9948764190758987,0.10109852010151632,0.6554197107875845"/>
                    <discreteMappingEntry attributeValue="3430070" value="0.9945696959100081,-0.10407266681254025,0.22276430813142328|0.9976150659461301,-0.06902304106092695,0.5247501864019958|0.9993230887055113,-0.03678810106646862,0.8207391915415484"/>
                    <discreteMappingEntry attributeValue="3430071" value="0.9574495721312947,0.28860061820030947,0.38523297900294573|0.946683718743977,0.3221644559306234,0.5548810740133423|0.9970395773910642,0.07689005862820056,0.7627693245662779"/>
                    <discreteMappingEntry attributeValue="3430064" value="0.6840333299378719,0.7294507547011699,0.3833917690873046|0.6665429892695246,0.7454665944599036,0.7180756477250867|0.9378307603408119,0.34709287655982596,0.7247257628649767"/>
                    <discreteMappingEntry attributeValue="3430065" value="0.992832736240906,0.11951216611038254,0.27872686491731485|0.9967280600000309,0.08082805458858217,0.5662596650250801|0.998603418154851,0.052831933993067376,0.8313947167649076"/>
                    <discreteMappingEntry attributeValue="3430066" value="1.0,0.0,0.25|1.0,0.0,0.5|1.0,0.0,0.75"/>
                    <discreteMappingEntry attributeValue="3430067" value="0.9911191695299274,-0.13297665881765502,0.2866972332326387|0.990900076702199,-0.13459954677329364,0.5508551243075558|0.9950602646629773,-0.09927270364428308,0.8036218594898054"/>
                    <discreteMappingEntry attributeValue="3430076" value="0.9752222434423315,0.22122743025064912,0.18420019435339718|0.9509996341355291,0.30919200486767073,0.3057394574822519|0.9846393059854534,0.17460079355055855,0.5702176811950859"/>
                    <discreteMappingEntry attributeValue="3430077" value="0.7433510057787799,-0.6689015489649254,0.10375703946655844|0.8988469135139695,-0.43826273634249424,0.47884853081069456|0.9880200517903011,-0.1543255560828822,0.6622189519032042"/>
                    <discreteMappingEntry attributeValue="3430078" value="0.8855289563069144,-0.46458418778730176,0.4543581808005071|0.9413559929862013,-0.33741501814377334,0.717663854022802|0.9870601709997154,-0.1603503003614665,0.8017442132508437"/>
                    <discreteMappingEntry attributeValue="3430079" value="0.9817237098599301,-0.19031173768019627,0.3482052729305411|0.9397838240136586,0.3417694604880091,0.5851754321545697|0.9980198677218874,0.06289947243329064,0.7606860623441389"/>
                    <discreteMappingEntry attributeValue="3430072" value="0.794685830720439,-0.607020947292732,0.2393641820329029|0.9053299076761523,-0.42470902776735225,0.3795048789591097|0.965450380810481,-0.2605869570659616,0.6021769508627733"/>
                    <discreteMappingEntry attributeValue="3430073" value="0.8346316088668287,0.5508085669997962,0.3700773449843533|0.9680973962784898,0.25057420321894414,0.5128272213060259|0.9977588542962021,-0.06691239551480768,0.6716981493870514"/>
                    <discreteMappingEntry attributeValue="3430074" value="0.9668793770819122,0.25523375594480735,0.5757799450716861|0.9515026028196191,0.30764069436192965,0.7891807537099128|0.9911946089392287,0.13241316856645882,0.8682114441630026"/>
                    <discreteMappingEntry attributeValue="3430075" value="1.0,0.0,0.25|1.0,0.0,0.5|1.0,0.0,0.75"/>
                    <discreteMappingEntry attributeValue="3430052" value="0.9997467405338601,-0.02250455047146065,0.33603620528597655|0.9408956767790221,0.33869650930965617,0.5306523982086373|0.9899349929496971,0.14152282407330322,0.7464385803347874"/>
                    <discreteMappingEntry attributeValue="3430053" value="0.9737067501469548,-0.22780510248511918,0.3301078986224543|0.9764770863274314,-0.21562119533452684,0.31476223194829384|0.9407981037614089,-0.338967443803881,0.6106770225943394"/>
                    <discreteMappingEntry attributeValue="3430054" value="0.48594934633507686,0.8739869751869942,0.4419188850715075|0.6281058772448856,0.7781278859997454,0.5714486974730586|0.9423493680556894,0.33463064492816985,0.6891282406629456"/>
                    <discreteMappingEntry attributeValue="3430055" value="0.9557840784855889,-0.2940693716003992,0.3373207588708001|0.9999989755938502,0.0014313669166867154,0.3904069280393247|0.9998105659569501,0.019463612224949804,0.672906970484377"/>
                    <discreteMappingEntry attributeValue="3430048" value="0.9996164475892858,-0.027694001317552935,0.3746201534570456|0.9911296859336488,-0.13289825303993533,0.5477972780692789|0.9999143522463572,0.013087710714558509,0.7543267109984862"/>
                    <discreteMappingEntry attributeValue="3430049" value="0.9944003847192563,-0.10567816647820438,0.20132909947969277|0.9994610579874422,0.032826720314747405,0.5230998414493176|0.9993252906199019,-0.03672823882857068,0.760944667207789"/>
                    <discreteMappingEntry attributeValue="3430050" value="0.8662764803577384,-0.4995648702411018,0.13304268780038256|0.9237235342018163,-0.383059828697432,0.3478274633025793|0.951539453912182,-0.30752669420475764,0.6348696993759326"/>
                    <discreteMappingEntry attributeValue="3430051" value="0.699842934734619,-0.7142967637488188,0.3329735528370323|0.9194268866425255,-0.3932609821973604,0.5266053348023014|0.978370392680608,-0.2068607616876456,0.7596356015800915"/>
                    <discreteMappingEntry attributeValue="3430060" value="0.8288170045477573,0.5595197699567753,0.32306743586773773|0.957370722774507,0.2888620763863234,0.5243845778952286|0.9816352145315248,0.1907676743886324,0.7735241666428486"/>
                    <discreteMappingEntry attributeValue="3430061" value="0.9331790715554807,-0.3594117699948778,0.34834804387007257|0.9677640176285666,-0.25185870281452555,0.577257287097867|0.9903264710917861,-0.13875691209770352,0.7802630106002996"/>
                    <discreteMappingEntry attributeValue="3430062" value="0.9671449242377009,0.25422567832784265,0.1335353606907775|0.9957627431844787,0.09195955244411533,0.5485068163443595|0.9984236122366913,0.056127448973181594,0.8873429413099632"/>
                    <discreteMappingEntry attributeValue="3430063" value="0.9933758035848398,0.11491089092063381,0.3086692357168292|0.9852354776706698,-0.17120471237395066,0.5102240143250658|0.9884628531476658,-0.15146348717488342,0.7038405665519588"/>
                    <discreteMappingEntry attributeValue="3430056" value="0.8322042411402883,-0.5544692065643653,0.24845900464993811|0.9520272265739416,-0.30601333281726295,0.6081866871004531|0.9509934146969096,-0.30921113369850023,0.8417283417014029"/>
                    <discreteMappingEntry attributeValue="3430057" value="0.905974524482515,-0.42333221113999914,0.26492502047857225|0.8902045650056682,-0.4555610084753402,0.4909448019734736|0.9674900841367322,-0.25290895021153137,0.626994787927507"/>
                    <discreteMappingEntry attributeValue="3430058" value="0.5168803618641079,-0.856057644974466,0.29942009650612483|0.9413083183245148,-0.33754799636951477,0.61979142908459|0.9759064258183654,-0.21818947739619177,0.878683426857675"/>
                    <discreteMappingEntry attributeValue="3430059" value="0.9933302883172289,-0.11530367865602068,0.2799500971444765|0.9968992083229956,-0.07868906178742124,0.5676594692018954|0.9986728381306277,-0.05150303272737557,0.8355613029864395"/>
                    <discreteMappingEntry attributeValue="3430036" value="0.9340362619909833,0.35717819262366945,0.23364803378736487|0.9324860248624336,0.36120605398616573,0.46728760204542963|0.9868430887195782,0.16168091491082923,0.6906027797921396"/>
                    <discreteMappingEntry attributeValue="3430037" value="0.9256600780722666,0.3783562076446551,0.15367162759792805|0.9760707710790822,0.21745309803515292,0.3204518075058112|0.9941714574689926,0.10781054287025471,0.5293504364210758"/>
                    <discreteMappingEntry attributeValue="3430038" value="0.9653622363477545,0.26091330482300457,0.1898296228434643|0.9705261321281509,0.24099590630625048,0.4328383815715787|0.9972472194460902,0.07414838708321071,0.7158560593670332"/>
                    <discreteMappingEntry attributeValue="3430039" value="0.6800829850999193,-0.7331351399145883,0.43446500227802537|0.8392461759851264,-0.5437516492796526,0.5523912302905701|0.9533404713482028,-0.3018972435938867,0.7008798308943591"/>
                    <discreteMappingEntry attributeValue="3430032" value="0.9143126930617725,-0.4050090113887948,0.39031130758815386|0.921786734610576,-0.3876973251080944,0.5585587788673702|0.9897817425672124,-0.14259068020250293,0.7475990495070182"/>
                    <discreteMappingEntry attributeValue="3430033" value="0.9900110046848134,-0.14099010817417787,0.18023833553099092|0.9987058911622887,-0.050858066791205976,0.36689894936942263|0.9997389014938407,0.02285013872799625,0.627752827568478"/>
                    <discreteMappingEntry attributeValue="3430034" value="0.9999285555862916,0.011953397973489162,0.26049220033224485|0.9998757454182322,0.015763683717154805,0.5209312968807034|0.9998921067630033,0.014689276123851392,0.786013628426498"/>
                    <discreteMappingEntry attributeValue="3430035" value="0.9418786172726226,-0.3359533752243198,0.2251198094774673|0.941698628913887,-0.3364575638943273,0.45027592371237907|0.9843659488740365,-0.17613539876276363,0.7068720331671702"/>
                    <discreteMappingEntry attributeValue="3430044" value="0.9907092594545838,-0.13599692360840454,0.3620670813857893|0.9202782101739516,-0.39126463663232863,0.5747236332841835|0.9847131840347917,-0.17418365361899626,0.781131865593395"/>
                    <discreteMappingEntry attributeValue="3430045" value="0.8655269414354033,0.500862369967515,0.18877697033136198|0.8970706285394935,0.44188718855807313,0.3303910613346409|0.9121843517061892,0.4097800733349041,0.4443076242548411"/>
                    <discreteMappingEntry attributeValue="3430046" value="0.9842316119274311,0.1768845218856941,0.2825077996710768|0.9999677668270611,0.008029029013543196,0.498346213281059|0.9982612774181082,-0.058944227941052765,0.7338054096626063"/>
                    <discreteMappingEntry attributeValue="3430047" value="0.6078178126052364,0.7940765118549885,0.3884635932467727|0.8068749301954995,0.5907223095685551,0.6238837597817103|0.9534166782789598,0.3016564893707981,0.7979629441377032"/>
                    <discreteMappingEntry attributeValue="3430040" value="0.3617346831871,0.9322810836756951,0.22988283023680114|0.9027165118376974,0.4302358646784114,0.28781390267412665|0.9934688422669755,0.1141037223087631,0.5341495224066061"/>
                    <discreteMappingEntry attributeValue="3430041" value="0.8558195545596705,0.5172744822947359,0.39245767138250104|0.7762420567946059,0.6304349841682961,0.593737624452412|0.9444419090910622,0.32867838437054214,0.7377836713761792"/>
                    <discreteMappingEntry attributeValue="3430042" value="0.9892588303148886,-0.14617443909253922,0.30327380764460965|0.9942859549702459,-0.10674942505187666,0.509972484118773|0.9980640739764408,-0.06219408522962356,0.7541320525172958"/>
                    <discreteMappingEntry attributeValue="3430043" value="0.8554162301126311,0.5179411870665376,0.32023609202980075|0.9700195349102853,0.2430269571311666,0.5589716163255127|0.9975311510507049,0.0702253706537444,0.7661088900088701"/>
                    <discreteMappingEntry attributeValue="3430020" value="0.8494824700502931,-0.5276168430568275,0.39711615904809777|0.9745271426461021,-0.224269588321787,0.7097160339178263|0.9972477187861581,-0.07414167098065465,0.717590189413434"/>
                    <discreteMappingEntry attributeValue="3430021" value="0.9943013842939055,0.1066056151955577,0.4178552347507301|0.9898616970855406,0.14203457551924967,0.5738255681743595|0.98511006398931,0.1719248726245785,0.826368445725635"/>
                    <discreteMappingEntry attributeValue="3430022" value="0.4717187730561699,-0.8817490567879173,0.4122472968876326|0.7337381614479559,-0.6794323442661333,0.7198530556968264|0.8954257329914349,-0.44521091259845763,0.7645797459219364"/>
                    <discreteMappingEntry attributeValue="3430023" value="0.5747966265761519,-0.8182963021281935,0.3104067233318798|0.8696922549305722,-0.49359434935357244,0.5969289203804159|0.9546732315344618,-0.29765587679659183,0.6786623488874308"/>
                    <discreteMappingEntry attributeValue="3430016" value="0.9132919217821287,0.4073056169604172,0.34269321023243976|0.964828444925163,0.26288033753647644,0.621280418510716|0.9955121888331242,0.09463340786784583,0.7427671587553761"/>
                    <discreteMappingEntry attributeValue="3430017" value="1.0,0.0,0.25|1.0,0.0,0.5|1.0,0.0,0.75"/>
                    <discreteMappingEntry attributeValue="3430018" value="0.9889565959616387,-0.14820543614850368,0.435403585584584|0.9971925895213899,-0.07487949922124748,0.7907197223281461|0.9966249773843082,-0.08208930779174063,0.7823901519330064"/>
                    <discreteMappingEntry attributeValue="3430019" value="0.8908821252227348,-0.45423456380885796,0.24163563517391687|0.9394692297118596,-0.3426332827157996,0.47852392843390884|0.9784617708486677,-0.20642810609916787,0.7240450427481305"/>
                    <discreteMappingEntry attributeValue="3430028" value="0.9418560307606483,0.3360166920255551,0.22840634974454813|0.949954113333956,0.3123894725497285,0.41711098504838107|0.9470901992245613,0.32096752878255586,0.571838348301283"/>
                    <discreteMappingEntry attributeValue="3430029" value="0.9702292560694148,-0.24218833718201613,0.3079394424839188|0.9128328795047199,-0.40833336147701854,0.5483573962074759|0.9714069706388581,-0.237420507526702,0.6627579709731648"/>
                    <discreteMappingEntry attributeValue="3430030" value="0.3365128573098122,-0.9416788714127475,0.44675299103014604|0.6731214010411803,-0.7395320002950234,0.7017063825996926|0.8597199174081883,-0.5107657619806342,0.7291507105506442"/>
                    <discreteMappingEntry attributeValue="3430031" value="0.7522993875670893,-0.6588213957258693,0.1673437618467115|0.8314322158175343,-0.5556261967372894,0.29913567307362166|0.9903244099212242,-0.13877162215013253,0.6706051019986451"/>
                    <discreteMappingEntry attributeValue="3430024" value="0.9999686105274598,0.00792325436809002,0.36799192053891244|0.9998974481369269,0.01432107570196833,0.5024234571551681|0.999945360123841,0.010453552831541325,0.6487351852587335"/>
                    <discreteMappingEntry attributeValue="3430025" value="0.6993471064789807,-0.7147822218406648,0.15599986541671587|0.8097924946153426,-0.5867163843499347,0.2851458913071129|0.9912161369311479,-0.13225191827452618,0.6749355103996931"/>
                    <discreteMappingEntry attributeValue="3430026" value="0.87959522840157,0.4757228543734155,0.4059566622415971|0.715763631398095,0.6983426264863202,0.6559506781937765|0.8707696162888602,0.4916912398529703,0.7197940934746995"/>
                    <discreteMappingEntry attributeValue="3430027" value="0.9171701021727494,0.39849592680531676,0.4051170305667723|0.9128489661887593,0.40829739765042994,0.5503365465512857|0.9932228384968116,0.1162256128757191,0.7259722208259934"/>
                    <discreteMappingEntry attributeValue="3430132" value="0.9660541118601281,-0.2583398013433839,0.33905028826295863|0.9838748744519924,-0.17885813211055346,0.55111229776357|0.9788159500896175,-0.20474212036158893,0.7300548809151525"/>
                    <discreteMappingEntry attributeValue="3430133" value="0.9297848266750457,-0.3681034855646646,0.23054442463551342|0.9579418115044992,-0.28696251631786085,0.5022172376658293|0.9805265675466279,-0.1963864820582825,0.726315413261065"/>
                    <discreteMappingEntry attributeValue="3430134" value="0.9677406946200225,0.25194830417440056,0.2531133164634444|0.9852505995750643,0.17111766722631605,0.4871439478596108|0.995596556711438,0.09374164637090841,0.7259802338960297"/>
                    <discreteMappingEntry attributeValue="3430135" value="0.6639026960974729,0.7478189688116413,0.4533244078465287|0.8406764302895187,0.5415377545062505,0.5091647359430842|0.9770892729254607,0.21282986804956358,0.5389384541216036"/>
                    <discreteMappingEntry attributeValue="3430128" value="-0.5704954839514496,0.8213007383358433,0.19557024379530788|0.9946298634608522,0.10349606133494363,0.35991282128539764|0.9951214394787479,0.09865759316821356,0.8606778504216295"/>
                    <discreteMappingEntry attributeValue="3430129" value="0.936137582554106,0.35163393825078154,0.4469510525301617|0.9863489372960448,-0.16466867915594366,0.7375985787237482|0.9788391150206587,-0.20463134389817636,0.6992618721263674"/>
                    <discreteMappingEntry attributeValue="3430130" value="0.966733204020759,-0.25578684923927875,0.29340290288371373|0.9710931478076863,-0.23870085521622902,0.662121431887577|0.9987141020969208,-0.05069657062111067,0.8535512426855809"/>
                    <discreteMappingEntry attributeValue="3430131" value="0.9803519222884222,0.19725645354562032,0.2896887354726272|0.8365154367341504,0.5479433584828578,0.27638396989563113|0.9723716245619394,0.2334382653867502,0.4819285992837198"/>
                    <discreteMappingEntry attributeValue="3430140" value="-0.41840480372997924,-0.9082606565384617,0.15198753372150295|0.9067533013871857,-0.4216615353852419,0.3568349601204436|0.9882166589542835,-0.153061539797669,0.7179094914536146"/>
                    <discreteMappingEntry attributeValue="3430141" value="0.9992736619427138,0.038107066898396616,0.3495319263667865|0.9989892881990865,-0.04494888278347409,0.5551602669485882|0.9929603293596958,-0.11844739050685935,0.7408566103228845"/>
                    <discreteMappingEntry attributeValue="3430142" value="0.9293756987811729,0.3691352198246689,0.23706449269382462|0.9608151721554901,0.27718983559253396,0.520639610561801|0.9846951971773465,0.17428530820429644,0.759954134167649"/>
                    <discreteMappingEntry attributeValue="3430143" value="0.9580930732790527,0.2864570874227059,0.22670508267460826|0.9036041648612173,0.42836843166305105,0.4214908995785|0.9945082763277143,0.10465795868293347,0.6450235772146276"/>
                    <discreteMappingEntry attributeValue="3430136" value="0.9808497157563746,-0.19476610357205174,0.2824765344563293|0.9993875712532886,0.03499260528244543,0.6177146718446122|0.9989890814188225,-0.04495347824114698,0.7231499064759949"/>
                    <discreteMappingEntry attributeValue="3430137" value="1.0,0.0,0.25|1.0,0.0,0.5|1.0,0.0,0.7500000000000001"/>
                    <discreteMappingEntry attributeValue="3430138" value="0.8655690305317018,-0.5007896298690798,0.311723707094217|0.9976412968011217,-0.06864286501142156,0.5940548646389666|0.9913426150049283,-0.13130049381167833,0.8006239255819556"/>
                    <discreteMappingEntry attributeValue="3430139" value="0.9999999999999998,2.1073424255447017E-8,0.25|0.9999999999999998,2.1073424255447017E-8,0.5|1.0,0.0,0.7499999999999999"/>
                    <discreteMappingEntry attributeValue="3430116" value="0.39551896693279054,-0.9184578089364901,0.4972779673062014|0.7697156203070419,-0.6383869233116745,0.6539299772090845|0.9692230610019288,-0.2461841953132886,0.7244228205987088"/>
                    <discreteMappingEntry attributeValue="3430117" value="0.9609791044865489,0.27662096945139675,0.38487297618184224|0.9774906830884728,0.21097858771740538,0.6039212261031957|0.9920067459249573,0.1261848486918188,0.8020228227459152"/>
                    <discreteMappingEntry attributeValue="3430118" value="0.9901996004311687,0.13965941180584215,0.22898977565374956|0.9985750016226298,0.05336633896347861,0.49103631847534324|0.9999633165418585,0.00856537043021496,0.7506256794457996"/>
                    <discreteMappingEntry attributeValue="3430119" value="0.9955818790182989,-0.09389740236233013,0.4868254490304526|0.9982673685700829,-0.05884097932701525,0.6563924464804657|0.999389978932865,-0.034923774260061345,0.8775321531690775"/>
                    <discreteMappingEntry attributeValue="3430112" value="0.798966085973758,0.6013760832156311,0.21574772755893998|0.9345948875011579,0.3557139247438845,0.46034155414411637|0.9717925571951923,0.23583728666186118,0.7458919549501896"/>
                    <discreteMappingEntry attributeValue="3430113" value="1.0,0.0,0.25|1.0,0.0,0.5|0.9999999999999999,1.4901161193847656E-8,0.75"/>
                    <discreteMappingEntry attributeValue="3430114" value="1.0,0.0,0.25|1.0,0.0,0.5|1.0,0.0,0.75"/>
                    <discreteMappingEntry attributeValue="3430115" value="0.9999999999999999,1.4901161193847656E-8,0.25|0.9999999999999999,1.4901161193847656E-8,0.5|1.0,0.0,0.75"/>
                    <discreteMappingEntry attributeValue="3430124" value="0.6582721960289971,0.7527799917207959,0.40932010255992285|0.7491828934369634,0.6623631875198225,0.5942617050594533|0.938406381364688,0.3455335923091005,0.7553664864004898"/>
                    <discreteMappingEntry attributeValue="3430125" value="0.9634145443270986,-0.2680157006203348,0.11756495783096031|0.9991309144914722,-0.0416823188826451,0.38365630385661925|0.9996676255015701,-0.02578058424575864,0.6622128007316019"/>
                    <discreteMappingEntry attributeValue="3430126" value="0.826613783993405,-0.5627696261456409,0.47888022390738566|0.8518542446518884,-0.5237789093391988,0.685293282018471|0.9634273956385364,-0.2679695007517591,0.8709867280629408"/>
                    <discreteMappingEntry attributeValue="3430127" value="0.9569542624617752,-0.290238763014591,0.40062015448100247|0.9972818376149434,0.0736813162434121,0.37352434651287014|0.9678698721138134,-0.25145160698311425,0.6517639985585938"/>
                    <discreteMappingEntry attributeValue="3430120" value="0.6396591207389304,-0.7686587079162627,0.4036367729051355|0.9146995387330832,-0.4041345739249302,0.5277604879107266|0.9992382784115015,0.03902387675793702,0.5877455482742955"/>
                    <discreteMappingEntry attributeValue="3430121" value="0.8611298397708097,0.5083850893331743,0.4282967612927204|0.8954989380828107,0.4450636492599215,0.6742454715611942|0.926417856942358,0.3764969513001781,0.8961440681100135"/>
                    <discreteMappingEntry attributeValue="3430122" value="0.9999329560405931,0.011579439706711648,0.20186812556795347|0.9966956500289293,-0.08122672721099866,0.42971358428019457|0.9984597188477842,-0.055481436881210856,0.6999991424931707"/>
                    <discreteMappingEntry attributeValue="3430123" value="0.8868273210198816,0.46210096590755995,0.5694133009411942|0.9384284386592017,0.3454736828119516,0.8357122253833045|0.9841448255938149,0.17736674507054495,1.0639080386465505"/>
                    <discreteMappingEntry attributeValue="3430100" value="1.0,0.0,0.25|1.0,0.0,0.5|1.0,0.0,0.75"/>
                    <discreteMappingEntry attributeValue="3430101" value="0.7886848354306747,0.6147977149938747,0.4354104439563364|0.9689835111564399,0.24712538337236334,0.6723778730663484|0.9992915062352772,0.0376362267772818,0.7693572155482848"/>
                    <discreteMappingEntry attributeValue="3430102" value="0.5262225132366762,-0.8503469095392046,0.051244945320240036|0.9854118719617447,0.1701864935793966,0.35595389664900984|0.9919161766617561,0.1268948323483813,0.6680564807315721"/>
                    <discreteMappingEntry attributeValue="3430103" value="0.8391473254878894,-0.5439041883700863,0.05674909612317889|0.8409927931059724,0.5410463214400548,0.37203321928691224|0.8586572653607775,0.5125501932914974,0.7011267655471928"/>
                    <discreteMappingEntry attributeValue="3430096" value="0.9979477257667114,0.06403387101408543,0.5105285213327455|0.9876293865571305,0.15680623332248653,0.733978998862716|0.9957692439469424,0.09188913324944707,0.8797244181296701"/>
                    <discreteMappingEntry attributeValue="3430097" value="0.9845022828918351,-0.17537176221035466,0.1278701714209909|0.994586560044758,0.10391137848347033,0.4852225967850666|0.9986301083576244,-0.05232501009688633,0.8014476695687088"/>
                    <discreteMappingEntry attributeValue="3430098" value="0.6090591730823315,0.7931247844344965,0.2948423842905196|0.925371511380143,0.37906142764205114,0.46297716793534754|0.9846807693754858,0.1743668042435297,0.7260047909333911"/>
                    <discreteMappingEntry attributeValue="3430099" value="0.9997917759101872,0.02040599966563823,0.4092824283671155|0.9998470601934464,0.017488745596034378,0.6921091108957598|0.9998501117630842,0.01731340542319557,0.8596855820445998"/>
                    <discreteMappingEntry attributeValue="3430108" value="0.9999999999999998,2.1073424255447017E-8,0.25|0.9999999999999998,2.1073424255447017E-8,0.5|1.0,0.0,0.7499999999999999"/>
                    <discreteMappingEntry attributeValue="3430109" value="0.8719044397777085,0.4896760642464774,0.2459439555643085|0.9379426199197697,0.34679048680440827,0.5225307198921852|0.9926866147361021,0.12071986134757452,0.7612796736553512"/>
                    <discreteMappingEntry attributeValue="3430110" value="0.9999482362975877,0.010174710086473152,0.3206989784686445|0.9965346418288236,-0.0831787691367114,0.5137035148739131|0.9996111990715054,-0.027882802779260998,0.7388923642372531"/>
                    <discreteMappingEntry attributeValue="3430111" value="0.9517802650071602,-0.30678058469026354,0.2918936915216455|0.9808515943592175,-0.1947566426158065,0.5927747571782391|0.9944521513292262,-0.1051899173717419,0.8135215811501826"/>
                    <discreteMappingEntry attributeValue="3430104" value="0.1429390809627663,-0.989731488401536,0.0456669304332421|0.9685470854185291,-0.2488303504946142,0.32792656055668745|0.9615503736389862,-0.2746286200575716,0.613641774724362"/>
                    <discreteMappingEntry attributeValue="3430105" value="0.9999990233703612,0.0013975901845134837,0.6399364545607216|0.9997565311960954,-0.022065319638534184,0.8044565312055836|0.9994488924916456,0.03319504928785396,1.026043159295926"/>
                    <discreteMappingEntry attributeValue="3430106" value="0.9999999999999999,1.4901161193847656E-8,0.25|0.9999999999999999,1.4901161193847656E-8,0.5|1.0,0.0,0.7499999999999999"/>
                    <discreteMappingEntry attributeValue="3430107" value="0.8862545598495265,-0.46319850512056066,0.2614013394352446|0.9811691624826664,-0.19315039371707995,0.53489022998287|0.9944269735559466,-0.10542767314306412,0.775518793659377"/>
                    <discreteMappingEntry attributeValue="3430084" value="0.870973241802527,0.4913304509838535,0.2960838539451367|0.9971720503094583,0.07515252545078653,0.3640790304451004|0.9999827698757755,0.005870259923701568,0.5869772173967543"/>
                    <discreteMappingEntry attributeValue="3430085" value="0.6950323361551104,0.718978477910688,0.38388179563988334|0.9297546292388537,0.36817975149228643,0.6091481924766704|0.9935545038576257,0.113355405094893,0.7680837606039909"/>
                    <discreteMappingEntry attributeValue="3430086" value="0.13003315475554794,-0.9915096462790061,0.3333450372559938|0.5736609721179954,-0.819092845206596,0.39113732433489445|0.8865739867990718,-0.46258681988487216,0.5818937213262374"/>
                    <discreteMappingEntry attributeValue="3430087" value="0.8860035492554371,0.4636784561598352,0.3872944168096802|0.9235433953303197,0.3834939333832347,0.6311705732223996|0.9836211548503102,0.18024822809376537,0.741854958303466"/>
                    <discreteMappingEntry attributeValue="3430080" value="0.92581837742716,0.37796869184912757,0.4120243498335321|0.8968406433793039,0.4423537728820635,0.7076721837334984|0.9845299555893353,0.17521634212384823,0.7934363260769857"/>
                    <discreteMappingEntry attributeValue="3430081" value="0.7653076193863061,0.6436647013074935,1.318667305530669|0.8438627373623403,0.5365591118332983,1.1234291099873963|0.8258540126591194,0.5638839860953946,0.9979424733940665"/>
                    <discreteMappingEntry attributeValue="3430082" value="0.9986731088339172,0.051497783369761484,0.23942948419786966|0.9986679467345615,0.05159779224903952,0.47876797396431936|0.998782659663106,0.04932746452324727,0.7199088433029507"/>
                    <discreteMappingEntry attributeValue="3430083" value="0.9963563060095285,-0.08528840176159226,0.2362387772029354|0.9999899743301707,0.004477861001036091,0.38622892843093826|0.9923196305868341,-0.12370024556163588,0.7235111140790199"/>
                    <discreteMappingEntry attributeValue="3430092" value="0.9996513593212392,0.026403783956069366,0.28020769340461166|0.9999261414271398,0.012153669842138132,0.5269346901546103|0.9987650140771425,0.04968346460831222,0.7684027311360411"/>
                    <discreteMappingEntry attributeValue="3430093" value="0.9820267406487934,-0.1887418359842553,0.2953620631139323|0.9783787651867458,-0.2068211590521107,0.5478238951075312|0.9869533045400485,-0.1610067534530099,0.7915553037193471"/>
                    <discreteMappingEntry attributeValue="3430094" value="0.9807860139699441,0.1950866340909816,0.2437777728500678|0.9845748443144893,0.17496392754822124,0.4598828242371703|0.9964703807346283,0.08394510300538575,0.6996236395943882"/>
                    <discreteMappingEntry attributeValue="3430095" value="0.9460838770175889,0.3239217461785604,0.22952639306256892|0.8943609250030072,0.4473461029535915,0.4660068364215125|0.998782688214306,0.049326886415060875,0.573939539012728"/>
                    <discreteMappingEntry attributeValue="3430088" value="0.6465339019757305,0.7628852558517805,0.050327790427134894|0.9983914206657655,-0.056697188122468024,0.2053849563999301|0.9907004975498369,-0.13606073700559462,0.4881351072214045"/>
                    <discreteMappingEntry attributeValue="3430089" value="0.8729596012917993,-0.48779251174291594,0.32410711035309675|0.9849038582766172,-0.17310225287913833,0.5023603352674452|0.999582041347866,0.028909213320896944,0.7253530969395598"/>
                    <discreteMappingEntry attributeValue="3430090" value="0.5784017368649407,-0.8157520645340838,0.3549508543309637|0.8562482873646813,-0.5165644881184247,0.5140278350333343|0.965980729714226,-0.258614055729327,0.6306418534148766"/>
                    <discreteMappingEntry attributeValue="3430091" value="0.8926072012114682,-0.4508352075264636,0.24015646428446963|0.9414106525387614,-0.33726248425602184,0.4441816326954096|0.977737101417044,-0.20983364961939996,0.6578192499359732"/>
                    <discreteMappingEntry attributeValue="3430196" value="1.0,0.0,0.25|1.0,0.0,0.5|1.0,0.0,0.75"/>
                    <discreteMappingEntry attributeValue="3430197" value="0.8651226992417229,-0.5015602807806011,0.21089924772906113|0.992079297810592,-0.12561316354444182,0.285470796468339|0.9986918162725655,0.05113370816011884,0.5362202455663834"/>
                    <discreteMappingEntry attributeValue="3430198" value="0.9241512738042138,-0.3820267309051149,0.43664988217468986|0.9695396387002132,-0.24493445855791718,0.6732798445048793|0.9796312948778402,-0.20080469639917825,0.83660673972259"/>
                    <discreteMappingEntry attributeValue="3430199" value="0.9531277589266348,-0.3025681330931774,0.09972087389845458|0.9965618495205524,-0.08285215796933666,0.4699515636114742|0.9806095066631199,0.19597192513702746,0.6402541300867549"/>
                    <discreteMappingEntry attributeValue="3430192" value="1.0,0.0,0.25|1.0,0.0,0.5|1.0,0.0,0.75"/>
                    <discreteMappingEntry attributeValue="3430193" value="0.9578230785213685,0.2873585743489279,0.27689651751719924|0.9842088521582462,0.17701111641178796,0.47347112039603606|0.9743116126147804,0.2252040886040618,0.6435883042344885"/>
                    <discreteMappingEntry attributeValue="3430194" value="0.9817402686295569,-0.1902262993152248,0.23344696208939872|0.991189179889674,-0.13245380202030974,0.44401023443402876|0.9952668779073796,-0.09717943064505594,0.6826766325107909"/>
                    <discreteMappingEntry attributeValue="3430195" value="0.9929315163803597,0.11868868429045572,0.3844410596777963|0.999347302602657,-0.036124351631461084,0.6138292231004413|0.9992563844563987,-0.03855746520618045,0.878530312068871"/>
                    <discreteMappingEntry attributeValue="3430204" value="0.9998986138622441,0.01423945210894256,0.27691415911832756|0.9998639341840795,0.016495851537122012,0.54944629507882|0.9996472009479181,0.026560753697750322,0.8215832528585262"/>
                    <discreteMappingEntry attributeValue="3430205" value="0.6976925974425991,-0.7163972637257902,0.28598898897321445|0.9296923294337361,-0.3683370366825381,0.39100272114937673|0.9732230321875223,-0.22986284958584544,0.7501230449416243"/>
                    <discreteMappingEntry attributeValue="3430206" value="0.5654913574301934,-0.8247542207662579,0.33471053820979696|0.7203300971491923,-0.6936314231211236,0.5657529887054368|0.9558033871853144,-0.29400660714528154,0.7190185926691633"/>
                    <discreteMappingEntry attributeValue="3430207" value="0.8190153839221241,-0.5737715581125432,0.334588360149146|0.9154791770923872,-0.40236535177652344,0.6515875477530921|0.9759152826545637,-0.21814985922815303,0.8309160269375483"/>
                    <discreteMappingEntry attributeValue="3430200" value="0.9650993921986998,-0.26188387345863867,0.4211517500344081|0.9926232364208037,-0.12123988831027994,0.649529710236845|0.9983618506133456,0.05721551572690593,0.7487086581512061"/>
                    <discreteMappingEntry attributeValue="3430201" value="0.9796231465058552,-0.20084444435922957,0.27369413573122126|0.9319281049721901,0.3626430850891032,0.49022928840400937|0.9889443514816578,0.14828711903777492,0.588081679030378"/>
                    <discreteMappingEntry attributeValue="3430202" value="0.8913514507717761,0.4533129065083521,0.3263911602679655|0.8567384537668075,0.5157511239321344,0.5816709511811585|0.9562881131894977,0.29242613524182554,0.6620938628316496"/>
                    <discreteMappingEntry attributeValue="3430203" value="1.0,0.0,0.25|1.0,0.0,0.5|1.0,0.0,0.75"/>
                    <discreteMappingEntry attributeValue="3430180" value="1.0,0.0,0.25|1.0,0.0,0.5|1.0,0.0,0.75"/>
                    <discreteMappingEntry attributeValue="3430181" value="0.9999999999999999,1.4901161193847656E-8,0.25|0.9999999999999999,1.4901161193847656E-8,0.5|1.0,0.0,0.7499999999999999"/>
                    <discreteMappingEntry attributeValue="3430182" value="0.13333306505765044,0.9910712859135474,0.3115922812375588|0.9306048915437777,0.366025321302767,0.5639634776915464|0.9940819666626594,0.10863260816209568,1.048693247847427"/>
                    <discreteMappingEntry attributeValue="3430183" value="0.8899163385363189,0.45612378846768326,0.15906130142508496|0.9624255328746795,0.2715457487623205,0.35021573115165605|0.9809707362119513,0.19415564554187514,0.6732398770729109"/>
                    <discreteMappingEntry attributeValue="3430176" value="0.9499755321412369,-0.3123243319579405,0.24478480286799936|0.9990150970803698,-0.0443715652811485,0.5800798846024535|0.9998731845070629,0.015925291322453943,0.8126270784348728"/>
                    <discreteMappingEntry attributeValue="3430177" value="0.9841799097211654,-0.1771719653366149,0.38632207588305434|0.9670472634504379,-0.2545969172103609,0.5846189219047809|0.9630576897895847,-0.2692951654544656,0.7974125017460226"/>
                    <discreteMappingEntry attributeValue="3430178" value="0.9216072917944523,-0.38812369125228,0.23898336424509192|0.9265723139906082,-0.3761166666688538,0.4868692515563061|0.9337389425561772,-0.3579547277995809,0.7592437246054075"/>
                    <discreteMappingEntry attributeValue="3430179" value="0.9927492838407661,-0.1202034085774859,0.37286271520977493|0.9982881023007855,0.05848815952563817,0.5351028655120423|0.9935351195119431,0.11352517912951739,0.676359345090103"/>
                    <discreteMappingEntry attributeValue="3430188" value="0.9168104002484441,0.39932278922732145,0.140583474328557|0.9118937200850673,-0.410426416388391,0.4312014682375362|0.9988793888276272,-0.04732828515112307,0.683228263599762"/>
                    <discreteMappingEntry attributeValue="3430189" value="0.8969557680423808,0.44212028926017727,0.617906129409533|0.878435989335255,0.4778600345714127,0.8804997196619146|0.9469181791444179,0.32147466775131767,0.9265376423981677"/>
                    <discreteMappingEntry attributeValue="3430190" value="-0.0289540621564279,0.9995807432542114,0.19965434999202475|0.5564346717834262,0.8308913623556756,0.2589703357920197|0.9742803534441683,0.22533928395356742,0.5555345270007281"/>
                    <discreteMappingEntry attributeValue="3430191" value="0.501675928872631,0.8650556412103113,0.5044165798134753|0.8612199080841936,0.5082324959302121,0.6904040131165923|0.9528787471077472,0.3033514353194491,0.8568047425121128"/>
                    <discreteMappingEntry attributeValue="3430184" value="0.9876235058170003,0.15684326813012267,0.4907187261327064|0.9964026449368657,0.084745319415401,0.7459352709766427|0.998295172852444,0.058367352685461435,1.0142877799231371"/>
                    <discreteMappingEntry attributeValue="3430185" value="-0.10147509403962711,-0.994838079935448,0.08065397484642435|0.994002273757784,-0.10935940638260312,0.35190725721850197|0.9992712312105355,-0.03817075418406704,0.6834399402338371"/>
                    <discreteMappingEntry attributeValue="3430186" value="0.9993475061924266,0.03611871906612726,0.33307369850032903|0.9845183167156112,0.17528172765995748,0.46508062781130993|0.9947124725549804,0.10269906009091488,0.7148206325895637"/>
                    <discreteMappingEntry attributeValue="3430187" value="0.9313611176193687,0.3640967846422164,0.4763095059737548|0.9206539223117037,0.39037975784109935,0.7008658569861113|0.9724639059209353,0.2330535382288761,0.7325894613401285"/>
                    <discreteMappingEntry attributeValue="3430164" value="0.9789867961648362,-0.20392364486471273,0.26822906147482684|0.9581172913743805,-0.2863760743662439,0.4784677899141242|0.9963805098172593,-0.08500517429132394,0.6676368710665265"/>
                    <discreteMappingEntry attributeValue="3430165" value="0.938104093808938,0.346353445455522,0.2818357816100852|0.9641692063180348,0.26528803513926297,0.5126846710336548|0.9917261938276678,0.12837116684087232,0.7828030337446231"/>
                    <discreteMappingEntry attributeValue="3430166" value="0.8705080565879252,-0.49215416630921016,0.3807235080179049|0.9341985950261273,-0.3567533952903738,0.6591671736823117|0.971397570935179,-0.23745896315202325,0.8693928337238529"/>
                    <discreteMappingEntry attributeValue="3430167" value="0.9700376414317284,0.24295467520829775,0.40405607337704813|0.9979346457528792,0.06423739414138455,0.6345319064726295|0.9977024112933252,-0.06774878965328203,0.7676146375676534"/>
                    <discreteMappingEntry attributeValue="3430160" value="0.6922128578264433,0.7216933971291051,0.4120375815264068|0.8656490002384957,0.5006513840848669,0.710195714983783|0.9848459597549246,0.17343135689488623,0.7671987855055001"/>
                    <discreteMappingEntry attributeValue="3430161" value="0.9762765131145327,0.21652752698197453,0.35298004492662904|0.998823116414352,-0.048501362004813094,0.5611178743139194|0.994290512218139,-0.10670696937403262,0.7859821243402929"/>
                    <discreteMappingEntry attributeValue="3430162" value="1.0,0.0,0.25|1.0,0.0,0.5|1.0,0.0,0.75"/>
                    <discreteMappingEntry attributeValue="3430163" value="0.9736228056444138,0.22816360868705587,0.17946612284772154|0.9873994348658016,0.1582477678411155,0.3817295690360178|0.9991413975571858,0.041430275010837486,0.7114461433065092"/>
                    <discreteMappingEntry attributeValue="3430172" value="0.953357352516135,-0.30184393053932024,0.3531079700263728|0.9798334382698417,-0.19981599847935175,0.47880551160165585|0.9939172330619829,-0.11012962281971195,0.6199720535142327"/>
                    <discreteMappingEntry attributeValue="3430173" value="0.7253764821783246,-0.6883523509821106,0.3208355917207952|0.8438880298018715,-0.5365193315781973,0.4518660837512979|0.9318641809888074,-0.36280731551342676,0.6179327969389291"/>
                    <discreteMappingEntry attributeValue="3430174" value="0.9525652661567335,0.30433437812996317,0.16680390252344485|0.963448734454287,0.2678927697389997,0.30960022763489903|0.9987679023604819,0.04962536865800586,0.7808169540244058"/>
                    <discreteMappingEntry attributeValue="3430175" value="0.5506099653851524,0.8347626405263722,0.1785980217240008|0.9982146984820017,-0.05972784722795873,0.33359055531649145|0.9416822916341174,-0.3365032861989865,0.6224038003915926"/>
                    <discreteMappingEntry attributeValue="3430168" value="0.9992626724012474,0.03839416030488533,0.2424146801578094|0.9982044868046526,0.059898268114029776,0.5548867618310513|0.999462791650542,0.03277389366714506,0.8484998091993315"/>
                    <discreteMappingEntry attributeValue="3430169" value="1.0,0.0,0.25|1.0,0.0,0.5|1.0,0.0,0.7500000000000001"/>
                    <discreteMappingEntry attributeValue="3430170" value="0.9908891609075633,-0.1346798826696294,0.3521233103617745|0.9972023863798222,-0.07474891703822775,0.6300975930765512|0.9958185560139481,-0.09135318001194778,0.8685872518906392"/>
                    <discreteMappingEntry attributeValue="3430171" value="0.9954698573322615,-0.09507766900217436,0.3308811025806564|0.9732833717667941,-0.2296072260236171,0.5166637763012143|0.9990144237102798,0.04438672345214841,0.671918583850385"/>
                    <discreteMappingEntry attributeValue="3430148" value="0.968138428056505,0.2504156227560085,0.4608652796340881|0.7271198644916265,0.6865105262570114,0.8265639913564377|0.8823163708049576,0.4706567983250306,1.0359948175757476"/>
                    <discreteMappingEntry attributeValue="3430149" value="0.8059514403851356,0.591981651524036,0.6524449390722825|0.7755680129768459,0.6312640154857134,1.1727719071465885|0.9109790798860438,0.4124525621328798,1.2866009465956256"/>
                    <discreteMappingEntry attributeValue="3430150" value="1.0,0.0,0.25|1.0,0.0,0.5|1.0,0.0,0.75"/>
                    <discreteMappingEntry attributeValue="3430151" value="0.49162707781426634,0.8708058430900687,0.36219722984796715|0.7967275298221251,0.6043386825477373,0.4497370168253639|0.9991241173429617,0.041844929724492476,0.6899892715940209"/>
                    <discreteMappingEntry attributeValue="3430144" value="0.6042881600468855,0.7967658499378282,0.24589993931954748|0.8307853570051947,0.5565929307723474,0.36366287490378435|0.9627485774857627,0.27039818148268,0.48309736881342336"/>
                    <discreteMappingEntry attributeValue="3430145" value="0.05049486073991782,0.9987243208407695,0.3063197969583161|0.45738164434636824,0.8892705051979473,0.37241924245721497|0.8831211360981647,0.4691450297900287,0.563400003431542"/>
                    <discreteMappingEntry attributeValue="3430146" value="0.19395035760705823,-0.981011344880422,0.1766573321012017|0.4830048571191501,-0.8756176722744404,0.7251093846363014|0.7394648629400972,-0.6731951548228665,0.9303838275948856"/>
                    <discreteMappingEntry attributeValue="3430147" value="0.744655303786673,-0.6674492329326461,0.7048840865743542|0.8323215564092297,-0.5542930873973781,1.1000480398993024|0.9271720085463302,-0.3746359120107999,1.1214316443470738"/>
                    <discreteMappingEntry attributeValue="3430156" value="0.8606957240977774,-0.5091197015632007,0.4821204543941052|0.905561171306841,-0.4242157057693434,0.6942679495816793|0.9483413494992295,-0.3172517688366452,0.8684887410416237"/>
                    <discreteMappingEntry attributeValue="3430157" value="0.3790055859176499,-0.9253943839483894,0.09451020823232233|0.7794129272856052,-0.6265105655773763,0.425322084808945|0.8906640019966581,-0.45466211140504886,0.6998189037739401"/>
                    <discreteMappingEntry attributeValue="3430158" value="0.9999999999999998,2.1073424255447017E-8,0.25|0.9999999999999998,2.1073424255447017E-8,0.5|0.9999999999999999,1.4901161193847656E-8,0.75"/>
                    <discreteMappingEntry attributeValue="3430159" value="0.9789854299456718,0.203930203633714,0.3359611861131718|0.9738031754522698,0.22739255809959094,0.5631349952284083|0.9999995477730727,9.510276810853847E-4,0.7496025810079291"/>
                    <discreteMappingEntry attributeValue="3430152" value="0.9698425178787071,0.24373241580612467,0.386932370635413|0.9989372552889018,0.04609077994431764,0.5048257849495077|0.9999412359941989,0.010840874429388237,0.6654809747421664"/>
                    <discreteMappingEntry attributeValue="3430153" value="0.9190180867140262,0.3942153679050205,0.40953123248298523|0.7919917029019157,0.610531852186701,0.6502368687397979|0.9161046817978518,0.4009391624524309,0.8643567196510406"/>
                    <discreteMappingEntry attributeValue="3430154" value="0.5558021300990023,-0.8313146168433535,0.39644564416856853|0.8021772822863512,-0.5970859299830165,0.6197672175213856|0.9301543651418512,-0.3671687037419716,0.7818424705957072"/>
                    <discreteMappingEntry attributeValue="3430155" value="0.9999303172185964,0.011805113600352328,0.21708613961324905|0.9996171769807052,0.027667661359889784,0.48958742336898886|0.9994938262381452,0.031813382590230956,0.7596792369507008"/>
                    <discreteMappingEntry attributeValue="3430260" value="0.9776878917682328,-0.21006281510488317,0.36619707460157236|0.9881074898108906,-0.1537647182536383,0.607436239879339|0.9988732341626391,-0.04745800326045778,0.9123310689146658"/>
                    <discreteMappingEntry attributeValue="3430261" value="0.9778762162148117,0.20918438221196836,0.26034085032902593|0.9960864482844778,0.08838431729676005,0.5359997890220266|0.9984366390311871,-0.05589523986984095,0.8111725654850924"/>
                    <discreteMappingEntry attributeValue="3430262" value="0.9700833788484522,0.24277198784450066,0.34102375705795|0.9114451985272818,0.41142149929429295,0.5987364019336232|0.9992666157984886,0.03829139003269151,0.7756062809109946"/>
                    <discreteMappingEntry attributeValue="3430263" value="0.9480731009126877,-0.3180525040395071,0.30593369617398547|0.9999983739711894,0.001803345495800803,0.6489647374521562|0.9999243353218278,-0.012301367046020084,0.9322912866616192"/>
                    <discreteMappingEntry attributeValue="3430256" value="0.9979890241878409,-0.06338696711944182,0.46705469302131436|0.9983613342970658,0.05722452429319554,0.6626702271288699|0.99999265196616,0.003833538011588856,0.8432017668166333"/>
                    <discreteMappingEntry attributeValue="3430257" value="0.8407586113057985,0.541410156457325,0.30514154346764794|0.9013290201713529,0.43313507985032684,0.5409512746001722|0.9450900473646437,0.326810040195058,0.6783520030140948"/>
                    <discreteMappingEntry attributeValue="3430258" value="1.0,0.0,0.25|1.0,0.0,0.5|1.0,0.0,0.75"/>
                    <discreteMappingEntry attributeValue="3430259" value="0.9005437961528212,-0.43476530589579704,0.20861105330793497|0.887959216885059,-0.4599221990172608,0.3643774937959185|0.980947501912572,-0.19427299990344676,0.6370310712754755"/>
                    <discreteMappingEntry attributeValue="3430268" value="0.9815792734099577,0.191055306160231,0.4065874832873443|0.9758276253155468,0.21854163372460825,0.6543652765511181|0.9820269405513533,0.1887407958851207,0.7713672410094966"/>
                    <discreteMappingEntry attributeValue="3430269" value="0.9581741281246371,-0.28618584904322497,0.22523854519381056|0.9471269329003634,-0.32085911701983855,0.5875682599222254|0.996088446595409,-0.08836179354871149,0.8458688939974414"/>
                    <discreteMappingEntry attributeValue="3430270" value="1.0,0.0,0.25|1.0,0.0,0.5|1.0,0.0,0.75"/>
                    <discreteMappingEntry attributeValue="3430271" value="0.7878604097180388,-0.6158538583129313,0.4473018642498217|0.8564773158006537,-0.5161846641647806,0.6178987206620207|0.9460268863535704,-0.3240881520453484,0.8733398639616108"/>
                    <discreteMappingEntry attributeValue="3430264" value="0.9844720342104692,-0.1755414875677561,0.32274756497178675|0.9994427494621584,0.03337949291887614,0.5130128164444776|0.9993940136787188,0.03480812294767936,0.6380931138760647"/>
                    <discreteMappingEntry attributeValue="3430265" value="0.9181229224373059,-0.3962957220248294,0.291835198540312|0.9341361107706304,-0.3569169743152047,0.46528336459206737|0.9759225062537487,-0.2181175412189536,0.6630350594573173"/>
                    <discreteMappingEntry attributeValue="3430266" value="0.8358881040574334,0.5488998792997402,0.22704939650445605|0.8992087840459206,0.43751978548936143,0.4699670605021566|0.9552092503726834,0.295931221743256,0.7013011658558879"/>
                    <discreteMappingEntry attributeValue="3430267" value="0.6703003926512092,-0.7420898756967613,0.22919287905116875|0.8826615832062559,-0.47000907388243673,0.47816120760236497|0.9592320057849614,-0.28261981366804384,0.768676283745302"/>
                    <discreteMappingEntry attributeValue="3430244" value="1.0,0.0,0.25|1.0,0.0,0.5|1.0,0.0,0.75"/>
                    <discreteMappingEntry attributeValue="3430245" value="0.9561004568982512,-0.29303910373695063,0.2282073489401046|0.980100517311338,-0.19850182862142032,0.4474698140318476|0.9985121386306898,-0.05452989095135044,0.697749693488695"/>
                    <discreteMappingEntry attributeValue="3430246" value="0.7880551265192927,-0.6156046763684155,0.07392824120547396|0.9973105289492331,-0.07329194257898249,0.32968504298431367|0.9957502142210409,0.09209511864779316,0.5609940421017462"/>
                    <discreteMappingEntry attributeValue="3430247" value="0.9982591037975951,-0.058981028180443644,0.32345191264360046|0.9999988913830468,0.0014890375003487235,0.5562155318844508|0.9864463166358003,0.16408432099278236,0.7612377033203218"/>
                    <discreteMappingEntry attributeValue="3430240" value="0.9662094623452717,0.2577581713049287,0.193914009781214|0.986028092929139,0.1665791101985039,0.4920631492069403|0.9947226611757195,0.10260032818414733,0.8031902224186658"/>
                    <discreteMappingEntry attributeValue="3430241" value="0.974492189035764,-0.2244214194507398,0.20175055088253593|0.9621435718099149,-0.2725431107638919,0.46658413798338044|0.9885659996334278,-0.15078880717334942,0.7489609219005808"/>
                    <discreteMappingEntry attributeValue="3430242" value="0.966241161113778,-0.2576393187568584,0.2782877836497339|0.9991268490959228,-0.04177965312988133,0.45947517882005323|0.9999722030043036,0.0074560860188109005,0.6368540246578958"/>
                    <discreteMappingEntry attributeValue="3430243" value="0.7731096020431374,-0.6342724518916943,0.2855032083387715|0.9219052041822823,-0.3874155320861883,0.60772827148796|0.9804854618612621,-0.1965916048022082,0.9030525579882981"/>
                    <discreteMappingEntry attributeValue="3430252" value="0.7410563544993013,-0.6714428340940172,0.2806303675293212|0.877116686472329,-0.4802773347887678,0.4951142256716287|0.9739879187590628,-0.22659994287596225,0.823847742967293"/>
                    <discreteMappingEntry attributeValue="3430253" value="0.9935938450425005,-0.11301004864019637,0.4175644167285983|0.9949311009432703,0.10055895969933294,0.6580709712264186|0.9951372151620023,0.09849834008558118,0.8173022936142718"/>
                    <discreteMappingEntry attributeValue="3430254" value="0.9999070388985176,0.013635012328500928,0.46304133309242557|0.9886963557044938,0.14993170517489998,0.798414672108198|0.9997954152623638,0.02022690338033705,0.9457279477225135"/>
                    <discreteMappingEntry attributeValue="3430255" value="0.995945744157105,0.08995595975448384,0.39814518838997814|0.9978078721366483,0.066177415347942,0.6241004874240829|0.9991343923793926,0.041598869752217126,0.7808984260247265"/>
                    <discreteMappingEntry attributeValue="3430248" value="0.5342394879522149,-0.8453331707158753,0.23592014415605336|0.8557322682436952,-0.5174188681199213,0.36311506414434874|0.9838740123824412,-0.17886287417593377,0.5837375985389005"/>
                    <discreteMappingEntry attributeValue="3430249" value="0.9991212012117915,-0.0419144997477826,0.40099145204775377|0.9977127245434995,-0.06759674018757979,0.602520767928739|0.999596525878496,-0.028403968941703432,0.6973469003580399"/>
                    <discreteMappingEntry attributeValue="3430250" value="0.995494978001866,-0.09481428570138709,0.23500436391334234|0.9962794646795318,-0.0861813683916983,0.47508677640855446|0.9964731191991562,-0.08391258971992421,0.713919473556081"/>
                    <discreteMappingEntry attributeValue="3430251" value="0.0464824937453183,0.9989191047203054,0.06016577471649117|0.9517738234367942,0.306800568807338,0.2170768929527085|0.9876709998927805,-0.15654391067938464,0.6402037941664142"/>
                    <discreteMappingEntry attributeValue="3430228" value="1.0,0.0,0.25|1.0,0.0,0.5|1.0,0.0,0.75"/>
                    <discreteMappingEntry attributeValue="3430229" value="0.9999965587155781,0.0026234627882432892,0.7655166647189525|0.9999381910184856,0.011118189721292212,1.0496370130621422|0.9994537712692567,-0.03304783042289271,1.0028872942643183"/>
                    <discreteMappingEntry attributeValue="3430230" value="0.9333226711366431,-0.35903870479707545,0.5869954832335443|0.9764354749013481,-0.21580955343584501,0.934993085741481|0.9993233861906059,-0.03678001920256618,1.0482079886382951"/>
                    <discreteMappingEntry attributeValue="3430231" value="0.9810326136678577,-0.19384274791699574,0.38540011305988175|0.9961047855976513,-0.08817741269427917,0.5601790496624142|0.9997445363456522,0.022602257564609034,0.7051824323488363"/>
                    <discreteMappingEntry attributeValue="3430224" value="1.0,0.0,0.25|1.0,0.0,0.5|1.0,0.0,0.75"/>
                    <discreteMappingEntry attributeValue="3430225" value="0.9655995904387906,-0.2600335188863924,0.195732764144892|0.9692641692419618,-0.24602229619221436,0.44696946090428763|0.9965804667183885,-0.08262792116082145,0.6831961969573179"/>
                    <discreteMappingEntry attributeValue="3430226" value="0.9802657145611984,-0.19768441733182499,0.3910582395761131|0.9917029771008797,-0.12855039949083008,0.5785517321070386|0.9996301398319403,0.02719528524534258,0.7597350687251508"/>
                    <discreteMappingEntry attributeValue="3430227" value="0.9355800991811137,0.35311453951410354,0.17072115301077334|0.9577189424131576,0.28770545240405676,0.43612636022612505|0.9729371696736411,0.23106982465792575,0.8055870232118549"/>
                    <discreteMappingEntry attributeValue="3430236" value="0.7336006908006771,0.6795807725773069,0.43967373657783876|0.87337896684971,0.48704125109125335,0.6034842178693666|0.9764883210339874,0.2155703107671006,0.7691309253196376"/>
                    <discreteMappingEntry attributeValue="3430237" value="0.5282841145558801,-0.8490676617961078,0.44425589752853284|0.6018929779972635,-0.7985767608925178,0.6673753844844511|0.9205768326665587,-0.3905615126425117,0.7005644972022207"/>
                    <discreteMappingEntry attributeValue="3430238" value="0.7274636475979339,0.6861462245203344,0.24270425803395446|0.8931801582208684,0.4496990159657285,0.45845389352051724|0.985408260559986,0.17020740295340497,0.6946840255890238"/>
                    <discreteMappingEntry attributeValue="3430239" value="0.9258268886185804,0.37794784337371035,0.19761027186533395|0.9471096207125951,0.32091021540867826,0.45712646784823535|0.984419865490534,0.1758338091141719,0.6723653308290022"/>
                    <discreteMappingEntry attributeValue="3430232" value="0.9940170491489879,-0.10922502461038192,0.32444371639416053|0.9942470516577054,-0.1071111584754829,0.4675368078088229|0.9994548061893272,-0.033016516852240864,0.6674093465113499"/>
                    <discreteMappingEntry attributeValue="3430233" value="0.7901764524208982,0.6128794123149546,0.4893799329364813|0.8486148124409238,0.5290112476175299,0.6107626194773881|0.9566777473754706,0.29114890979805375,0.7025332771614271"/>
                    <discreteMappingEntry attributeValue="3430234" value="1.0,0.0,0.25|1.0,0.0,0.5|1.0,0.0,0.75"/>
                    <discreteMappingEntry attributeValue="3430235" value="0.7292935137007209,-0.6842009725760818,0.38075757415429684|0.8467835983761014,-0.5319375315967293,0.608528787427193|0.9974228919745464,-0.07174659967644746,0.6786188740673239"/>
                    <discreteMappingEntry attributeValue="3430212" value="1.0,0.0,0.25|1.0,0.0,0.5|1.0,0.0,0.75"/>
                    <discreteMappingEntry attributeValue="3430213" value="0.9932220742182262,0.11623214394325017,0.24043763750831268|0.9879736212492023,0.15462252007950775,0.4317902564364647|0.9769231730554144,0.21359099687800698,0.664472766193718"/>
                    <discreteMappingEntry attributeValue="3430214" value="1.0,0.0,0.25|1.0,0.0,0.5|0.9999999999999998,2.1073424255447017E-8,0.75"/>
                    <discreteMappingEntry attributeValue="3430215" value="0.8925740117228209,0.4509009132803232,0.22203455536178016|0.9897547858101603,0.14277767320517487,0.41455278135116325|0.9892251409003877,0.14640225616638589,0.6320126471835786"/>
                    <discreteMappingEntry attributeValue="3430208" value="0.6510193463650689,0.7590611376288464,0.16836219685593332|0.974519329920748,0.22430353454820184,0.28984131441389416|0.9984342404174836,0.05593806898671507,0.6152515116982358"/>
                    <discreteMappingEntry attributeValue="3430209" value="-0.3552697257413826,0.9347638321905928,0.040975678398057325|0.7710485784084066,0.6367763262986269,0.16146969051597349|0.9651477878491144,0.26170545964874503,0.4685420750772765"/>
                    <discreteMappingEntry attributeValue="3430210" value="0.9559053666875494,-0.2936748711380353,0.22932745152556294|0.9803852724144967,-0.19709063304163674,0.5709920912194174|0.9994334691369147,-0.03365621441802155,0.7140282747350547"/>
                    <discreteMappingEntry attributeValue="3430211" value="0.9999999999999998,2.1073424255447017E-8,0.25|0.9999999999999998,2.1073424255447017E-8,0.5|1.0,0.0,0.7499999999999999"/>
                    <discreteMappingEntry attributeValue="3430220" value="0.9290347017454532,0.3699925985107496,0.33553875994168014|0.9609517288854402,0.27671605438081,0.5331731076491628|0.9943612755121126,0.10604552683599842,0.7335288932425202"/>
                    <discreteMappingEntry attributeValue="3430221" value="0.9910017149095786,0.13384917275155042,0.25690914833447415|0.9385901031691917,0.3450342276250954,0.4323788290487816|0.9997647674552372,0.021688931628261764,0.7636656522806518"/>
                    <discreteMappingEntry attributeValue="3430222" value="0.6026619189288016,0.7979966237228417,0.2930011282706196|0.935277017830641,0.3539165154634958,0.5442217931448654|0.982978574603786,0.18372022716595224,0.7524970760877705"/>
                    <discreteMappingEntry attributeValue="3430223" value="0.5279780818766924,-0.8492579967582341,0.34705017835177576|0.8766480352883508,-0.48113222945992146,0.5433912618374733|0.9903548215163797,-0.1385544207135225,0.8678362083068706"/>
                    <discreteMappingEntry attributeValue="3430216" value="0.8615364904208794,0.5076956526042683,0.29486180827558456|0.4957441957973297,0.8684685902974609,0.5114379835900899|0.7024406046683973,0.7117423669510593,0.6550772298652046"/>
                    <discreteMappingEntry attributeValue="3430217" value="0.45425796282798603,0.890870194364683,0.43788697642528984|0.35631180567761844,0.9343671104735842,0.8068113070520999|0.5955979734018669,0.8032826738325612,0.8898810995003725"/>
                    <discreteMappingEntry attributeValue="3430218" value="-0.43566980994225984,0.900106558527864,0.11573462648647559|0.6709900783362326,0.7414663274716772,0.4086517673402873|0.9909881494905596,0.13394957099325233,0.8722826041209032"/>
                    <discreteMappingEntry attributeValue="3430219" value="0.9585544940034876,0.2849092522641515,0.22980053721670127|0.9423004089231574,0.33476848618597665,0.5008215772979338|0.9777258119141278,0.20988624708841605,0.6506669079123273"/>
                    <discreteMappingEntry attributeValue="3430276" value="0.9188188055880536,0.39467962006891427,0.4581352083683259|0.965134889780367,0.26175302200478767,0.5979565403680764|0.9867883920109972,0.16201441106380163,0.7964882000843879"/>
                    <discreteMappingEntry attributeValue="3430277" value="0.9954323924617436,0.09546911562326937,0.3891191325208152|0.9850201797074716,0.17243910684372152,0.5750794233013602|0.996094070523768,0.08829837296004248,0.7567777217356919"/>
                    <discreteMappingEntry attributeValue="3430278" value="0.9624145556160772,-0.2715846518828127,0.19735337169748854|0.9661998677849774,-0.2577941339369309,0.36880257869981425|0.9927235284072197,-0.12041592978804806,0.6322705099354369"/>
                    <discreteMappingEntry attributeValue="3430279" value="0.9865059050449178,0.16372568311510483,0.2623939236143013|0.9947233173952037,0.1025939658570661,0.5053476907988851|0.9986993719978295,0.050985923264572575,0.7492140297853184"/>
                    <discreteMappingEntry attributeValue="3430272" value="0.7891835509268817,0.6141574089323012,0.5179363385385028|0.894578537426145,0.44691077451377165,0.740281472900464|0.9431785758464523,0.33228628329237136,0.8244727915045822"/>
                    <discreteMappingEntry attributeValue="3430273" value="0.8438014277043496,0.5366555232214621,0.39700858973604025|0.8430289488858229,0.5378681914191102,0.6677045923463201|0.9444876050572328,0.32854704974060045,0.8825030632144206"/>
                    <discreteMappingEntry attributeValue="3430274" value="0.6200680641527717,0.7845480200840699,0.22216209634992432|0.9502319733796235,0.31154325023512625,0.5137926620050134|0.9947352464014882,0.10247823947829345,0.851870456621478"/>
                    <discreteMappingEntry attributeValue="3430275" value="0.8484953983139258,0.5292027579672014,0.371511762481121|0.9601584786806737,0.2794560713557933,0.5819559333327295|0.9753269296012492,0.22076544202977022,0.8142833973799057"/>
                    <discreteMappingEntry attributeValue="3430284" value="0.32760336340766577,0.9448153450722447,0.319557284760328|0.6833042314808042,0.7301337735240218,0.4968296154656668|0.9283360057271264,0.37174219624708305,0.6555524174718252"/>
                    <discreteMappingEntry attributeValue="3430285" value="0.9677940461721289,0.2517432902656576,0.2553562028831689|0.9998928665159252,0.014637468721268494,0.5354708021390675|0.9999304934190067,0.01179017942279504,0.8166540326268596"/>
                    <discreteMappingEntry attributeValue="3430280" value="0.9501654597092913,0.31174604917373216,0.26055713678425074|0.9650807894771448,0.2619524189278864,0.47093293717077683|0.9924342603633981,0.12277719192486423,0.7213491434380083"/>
                    <discreteMappingEntry attributeValue="3430281" value="0.9915385662541027,0.12981244790372876,0.27185726702079965|0.9937084318753413,0.11199800185650713,0.6708060003574562|0.9976657893299867,0.06828596342276015,0.8268074182391044"/>
                    <discreteMappingEntry attributeValue="3430282" value="1.0,0.0,0.25|1.0,0.0,0.5|1.0,0.0,0.75"/>
                    <discreteMappingEntry attributeValue="3430283" value="1.0,0.0,0.25|1.0,0.0,0.5|1.0,0.0,0.75"/>
                </discreteMapping>
            </visualProperty>
            <visualProperty default="6.0" name="EDGE_TARGET_ARROW_SIZE"/>
            <visualProperty default="6.0" name="EDGE_SOURCE_ARROW_SIZE"/>
            <visualProperty default="#000000" name="EDGE_TARGET_ARROW_UNSELECTED_PAINT"/>
            <visualProperty default="NONE" name="EDGE_SOURCE_ARROW_SHAPE"/>
            <visualProperty default="#FF0000" name="EDGE_STROKE_SELECTED_PAINT"/>
            <visualProperty default="true" name="EDGE_CURVED"/>
            <visualProperty default="#FFFF00" name="EDGE_TARGET_ARROW_SELECTED_PAINT"/>
            <visualProperty default="false" name="EDGE_SELECTED"/>
            <visualProperty default="#FF0000" name="EDGE_SELECTED_PAINT"/>
            <visualProperty default="" name="EDGE_LABEL"/>
            <visualProperty default="#000000" name="EDGE_LABEL_COLOR"/>
            <visualProperty default="200.0" name="EDGE_LABEL_WIDTH"/>
        </edge>
    </visualStyle>
    <visualStyle name="ColorByPValue">
        <network>
            <visualProperty default="false" name="NETWORK_FORCE_HIGH_DETAIL"/>
            <visualProperty default="false" name="NETWORK_NODE_LABEL_SELECTION"/>
            <visualProperty default="0.0" name="NETWORK_CENTER_Z_LOCATION"/>
            <visualProperty default="0.0" name="NETWORK_CENTER_X_LOCATION"/>
            <visualProperty default="550.0" name="NETWORK_SIZE"/>
            <visualProperty default="400.0" name="NETWORK_HEIGHT"/>
            <visualProperty default="" name="NETWORK_TITLE"/>
            <visualProperty default="#FFFFFF" name="NETWORK_BACKGROUND_PAINT"/>
            <visualProperty default="1.0" name="NETWORK_SCALE_FACTOR"/>
            <visualProperty default="550.0" name="NETWORK_WIDTH"/>
            <visualProperty default="false" name="NETWORK_ANNOTATION_SELECTION"/>
            <visualProperty default="true" name="NETWORK_EDGE_SELECTION"/>
            <visualProperty default="0.0" name="NETWORK_CENTER_Y_LOCATION"/>
            <visualProperty default="true" name="NETWORK_NODE_SELECTION"/>
            <visualProperty default="0.0" name="NETWORK_DEPTH"/>
        </network>
        <node>
            <dependency value="true" name="nodeCustomGraphicsSizeSync"/>
            <dependency value="true" name="nodeSizeLocked"/>
            <visualProperty default="org.cytoscape.ding.customgraphics.NullCustomGraphics,0,[ Remove Graphics ]," name="NODE_CUSTOMGRAPHICS_2"/>
            <visualProperty default="26" name="NODE_LABEL_FONT_SIZE"/>
            <visualProperty default="" name="NODE_LABEL"/>
            <visualProperty default="4.0" name="NODE_BORDER_WIDTH"/>
            <visualProperty default="70.0" name="NODE_WIDTH"/>
            <visualProperty default="50.0" name="NODE_CUSTOMGRAPHICS_SIZE_1"/>
            <visualProperty default="DefaultVisualizableVisualProperty(id=NODE_CUSTOMPAINT_8, name=Node Custom Paint 8)" name="NODE_CUSTOMPAINT_8"/>
            <visualProperty default="0.0" name="NODE_DEPTH"/>
            <visualProperty default="255" name="NODE_BORDER_TRANSPARENCY"/>
            <visualProperty default="DefaultVisualizableVisualProperty(id=NODE_CUSTOMPAINT_1, name=Node Custom Paint 1)" name="NODE_CUSTOMPAINT_1"/>
            <visualProperty default="DefaultVisualizableVisualProperty(id=NODE_CUSTOMPAINT_6, name=Node Custom Paint 6)" name="NODE_CUSTOMPAINT_6"/>
            <visualProperty default="DefaultVisualizableVisualProperty(id=NODE_CUSTOMPAINT_9, name=Node Custom Paint 9)" name="NODE_CUSTOMPAINT_9"/>
            <visualProperty default="50.0" name="NODE_CUSTOMGRAPHICS_SIZE_9"/>
            <visualProperty default="E,W,c,0.00,0.00" name="NODE_LABEL_POSITION"/>
            <visualProperty default="50.0" name="NODE_CUSTOMGRAPHICS_SIZE_5"/>
            <visualProperty default="org.cytoscape.ding.customgraphics.NullCustomGraphics,0,[ Remove Graphics ]," name="NODE_CUSTOMGRAPHICS_8"/>
            <visualProperty default="C,C,c,0.00,0.00" name="NODE_CUSTOMGRAPHICS_POSITION_3"/>
            <visualProperty default="true" name="NODE_NESTED_NETWORK_IMAGE_VISIBLE"/>
            <visualProperty default="50.0" name="NODE_CUSTOMGRAPHICS_SIZE_8"/>
            <visualProperty default="50.0" name="NODE_CUSTOMGRAPHICS_SIZE_4"/>
            <visualProperty default="true" name="NODE_VISIBLE"/>
            <visualProperty default="#1E90FF" name="NODE_PAINT"/>
            <visualProperty default="org.cytoscape.ding.customgraphics.NullCustomGraphics,0,[ Remove Graphics ]," name="NODE_CUSTOMGRAPHICS_3"/>
            <visualProperty default="C,C,c,0.00,0.00" name="NODE_CUSTOMGRAPHICS_POSITION_7"/>
            <visualProperty default="SOLID" name="NODE_BORDER_STROKE"/>
            <visualProperty default="50.0" name="NODE_CUSTOMGRAPHICS_SIZE_2"/>
            <visualProperty default="org.cytoscape.ding.customgraphics.NullCustomGraphics,0,[ Remove Graphics ]," name="NODE_CUSTOMGRAPHICS_7"/>
            <visualProperty default="10.0" name="NODE_SIZE">
                <continuousMapping attributeName="#GeneInGOAndHitList" attributeType="float">
                    <continuousMappingPoint attrValue="5.0" equalValue="10.0" greaterValue="10.0" lesserValue="10.0"/>
                    <continuousMappingPoint attrValue="20.0" equalValue="30.0" greaterValue="30.0" lesserValue="30.0"/>
                </continuousMapping>
            </visualProperty>
            <visualProperty default="false" name="NODE_SELECTED"/>
            <visualProperty default="50.0" name="NODE_CUSTOMGRAPHICS_SIZE_3"/>
            <visualProperty default="30.0" name="NODE_HEIGHT"/>
            <visualProperty default="DefaultVisualizableVisualProperty(id=NODE_CUSTOMPAINT_4, name=Node Custom Paint 4)" name="NODE_CUSTOMPAINT_4"/>
            <visualProperty default="C,C,c,0.00,0.00" name="NODE_CUSTOMGRAPHICS_POSITION_4"/>
            <visualProperty default="DefaultVisualizableVisualProperty(id=NODE_CUSTOMPAINT_3, name=Node Custom Paint 3)" name="NODE_CUSTOMPAINT_3"/>
            <visualProperty default="ROUND_RECTANGLE" name="COMPOUND_NODE_SHAPE"/>
            <visualProperty default="10.0" name="COMPOUND_NODE_PADDING"/>
            <visualProperty default="org.cytoscape.ding.customgraphics.NullCustomGraphics,0,[ Remove Graphics ]," name="NODE_CUSTOMGRAPHICS_4"/>
            <visualProperty default="#0099CC" name="NODE_FILL_COLOR">
                <continuousMapping attributeName="LogP" attributeType="float">
                    <continuousMappingPoint attrValue="-20.0" equalValue="#993404" greaterValue="#993404" lesserValue="#993404"/>
                    <continuousMappingPoint attrValue="-18.59241707623005" equalValue="#D95F0E" greaterValue="#D95F0E" lesserValue="#D95F0E"/>
                    <continuousMappingPoint attrValue="-17.909952461719513" equalValue="#FE9929" greaterValue="#FE9929" lesserValue="#FE9929"/>
                    <continuousMappingPoint attrValue="-11.042654633522034" equalValue="#FEC44F" greaterValue="#FEC44F" lesserValue="#FEC44F"/>
                    <continuousMappingPoint attrValue="-4.04739236831665" equalValue="#FEE391" greaterValue="#FEE391" lesserValue="#FEE391"/>
                    <continuousMappingPoint attrValue="-2.0" equalValue="#FFFFD4" greaterValue="#FFFFD4" lesserValue="#FFFFD4"/>
                </continuousMapping>
            </visualProperty>
            <visualProperty default="C,C,c,0.00,0.00" name="NODE_CUSTOMGRAPHICS_POSITION_9"/>
            <visualProperty default="DefaultVisualizableVisualProperty(id=NODE_CUSTOMPAINT_5, name=Node Custom Paint 5)" name="NODE_CUSTOMPAINT_5"/>
            <visualProperty default="Dialog.plain,plain,12" name="NODE_LABEL_FONT_FACE"/>
            <visualProperty default="50.0" name="NODE_CUSTOMGRAPHICS_SIZE_6"/>
            <visualProperty default="org.cytoscape.ding.customgraphics.NullCustomGraphics,0,[ Remove Graphics ]," name="NODE_CUSTOMGRAPHICS_5"/>
            <visualProperty default="C,C,c,0.00,0.00" name="NODE_CUSTOMGRAPHICS_POSITION_1"/>
            <visualProperty default="0.0" name="NODE_Z_LOCATION"/>
            <visualProperty default="0.0" name="NODE_X_LOCATION"/>
            <visualProperty default="ELLIPSE" name="NODE_SHAPE"/>
            <visualProperty default="org.cytoscape.ding.customgraphics.NullCustomGraphics,0,[ Remove Graphics ]," name="NODE_CUSTOMGRAPHICS_6"/>
            <visualProperty default="DefaultVisualizableVisualProperty(id=NODE_CUSTOMPAINT_2, name=Node Custom Paint 2)" name="NODE_CUSTOMPAINT_2"/>
            <visualProperty default="C,C,c,0.00,0.00" name="NODE_CUSTOMGRAPHICS_POSITION_8"/>
            <visualProperty default="C,C,c,0.00,0.00" name="NODE_CUSTOMGRAPHICS_POSITION_5"/>
            <visualProperty default="C,C,c,0.00,0.00" name="NODE_CUSTOMGRAPHICS_POSITION_6"/>
            <visualProperty default="" name="NODE_TOOLTIP">
                <passthroughMapping attributeName="Description" attributeType="string"/>
            </visualProperty>
            <visualProperty default="#000000" name="NODE_LABEL_COLOR"/>
            <visualProperty default="0.0" name="NODE_Y_LOCATION"/>
            <visualProperty default="#FFFF00" name="NODE_SELECTED_PAINT"/>
            <visualProperty default="255" name="NODE_LABEL_TRANSPARENCY"/>
            <visualProperty default="#006699" name="NODE_BORDER_PAINT"/>
            <visualProperty default="C,C,c,0.00,0.00" name="NODE_CUSTOMGRAPHICS_POSITION_2"/>
            <visualProperty default="DefaultVisualizableVisualProperty(id=NODE_CUSTOMPAINT_7, name=Node Custom Paint 7)" name="NODE_CUSTOMPAINT_7"/>
            <visualProperty default="200.0" name="NODE_LABEL_WIDTH"/>
            <visualProperty default="org.cytoscape.ding.customgraphics.NullCustomGraphics,0,[ Remove Graphics ]," name="NODE_CUSTOMGRAPHICS_1"/>
            <visualProperty default="255" name="NODE_TRANSPARENCY"/>
            <visualProperty default="org.cytoscape.ding.customgraphics.NullCustomGraphics,0,[ Remove Graphics ]," name="NODE_CUSTOMGRAPHICS_9"/>
            <visualProperty default="50.0" name="NODE_CUSTOMGRAPHICS_SIZE_7"/>
        </node>
        <edge>
            <dependency value="false" name="arrowColorMatchesEdge"/>
            <visualProperty default="#000000" name="EDGE_SOURCE_ARROW_UNSELECTED_PAINT"/>
            <visualProperty default="#404040" name="EDGE_UNSELECTED_PAINT"/>
            <visualProperty default="#323232" name="EDGE_PAINT"/>
            <visualProperty default="" name="EDGE_TOOLTIP"/>
            <visualProperty default="#FFFF00" name="EDGE_SOURCE_ARROW_SELECTED_PAINT"/>
            <visualProperty default="100" name="EDGE_TRANSPARENCY"/>
            <visualProperty default="NONE" name="EDGE_TARGET_ARROW_SHAPE"/>
            <visualProperty default="SOLID" name="EDGE_LINE_TYPE"/>
            <visualProperty default="10" name="EDGE_LABEL_FONT_SIZE"/>
            <visualProperty default="3.0" name="EDGE_WIDTH">
                <continuousMapping attributeName="SCORE" attributeType="float">
                    <continuousMappingPoint attrValue="0.3" equalValue="2.0" greaterValue="2.0" lesserValue="2.0"/>
                    <continuousMappingPoint attrValue="1.0" equalValue="5.0" greaterValue="5.0" lesserValue="5.0"/>
                </continuousMapping>
            </visualProperty>
            <visualProperty default="true" name="EDGE_VISIBLE"/>
            <visualProperty default="255" name="EDGE_LABEL_TRANSPARENCY"/>
            <visualProperty default="Dialog.plain,plain,10" name="EDGE_LABEL_FONT_FACE"/>
            <visualProperty default="#54278F" name="EDGE_STROKE_UNSELECTED_PAINT"/>
            <visualProperty default="" name="EDGE_BEND">
                <discreteMapping attributeName="BEND_MAP_ID" attributeType="long">
                    <discreteMappingEntry attributeValue="3432496" value="0.46545729454461127,0.8850703401172197,0.3115962526348155|0.9750972702077261,0.22177762203035917,0.2944494512251408|0.9976296260459321,0.06881227532536409,0.6240199883605084"/>
                    <discreteMappingEntry attributeValue="3432497" value="0.990657468593455,0.13637367751882187,0.1154014719088046|0.9855691975322188,0.16927302465454505,0.7149918302958249|0.9993847223751936,-0.03507387465133001,1.1352248058816001"/>
                    <discreteMappingEntry attributeValue="3432498" value="0.14351306958826376,0.9896484218435122,0.2511386594832918|0.8817770820414209,0.4716663837783198,0.22957335724071856|0.9137772665351522,0.4062155919749331,0.50649461134021"/>
                    <discreteMappingEntry attributeValue="3432484" value="0.9748955394259549,-0.2226627207400837,0.4291234605643991|0.9799673412451049,-0.19915825389122135,0.5778578903173084|0.9991707894722386,-0.04071527312229994,0.8345474659017198"/>
                    <discreteMappingEntry attributeValue="3432485" value="1.0,0.0,0.25|1.0,0.0,0.5|1.0,0.0,0.75"/>
                    <discreteMappingEntry attributeValue="3432486" value="0.864918058925054,0.5019130914265106,0.2080065089012634|0.9850272159260116,0.17239890917592982,0.3364039657668237|0.9999999970109538,7.731812501970609E-5,0.678891525073503"/>
                    <discreteMappingEntry attributeValue="3432487" value="0.9853008134841854,0.17082829668237776,0.48634423553730144|0.9733263804678446,0.22942483973049788,0.6843110923086505|0.9980153054269103,0.06297182015497838,0.8652944323198152"/>
                    <discreteMappingEntry attributeValue="3432480" value="0.9961016711365034,0.08821258843875548,0.3589996496158685|0.9868918464098758,0.16138303346295754,0.5124041430053361|0.9984431104315249,-0.05577952340977633,0.6240325476955605"/>
                    <discreteMappingEntry attributeValue="3432481" value="0.8927455205245963,-0.45056124509689865,0.3564752787463063|0.9001171635413145,-0.4356478989945187,0.5415494493325494|0.9576098923643677,-0.28806821075207895,0.7734586260299628"/>
                    <discreteMappingEntry attributeValue="3432482" value="0.9253185307943277,0.3791907390333087,0.28298806335119936|0.9957928525707295,0.0916329349581767,0.48360026967649206|0.9720171676280549,0.23490982490379966,0.7033419646508275"/>
                    <discreteMappingEntry attributeValue="3432483" value="0.705833639575316,-0.7083776346299077,0.48199340708275396|0.7573275920332786,-0.6530351585826569,0.6813433920335625|0.8989044079631978,-0.43814479951761703,0.807059354149422"/>
                    <discreteMappingEntry attributeValue="3432492" value="0.6146558902866565,0.7887953705086749,0.22264353257840924|0.8760622275535299,0.4821980645481141,0.38608424261147317|0.9496255867329637,0.31338673395993394,0.6511186618281911"/>
                    <discreteMappingEntry attributeValue="3432493" value="-0.31008809904151413,0.9507078262183498,0.017532765713804358|0.33918801516915886,0.9407186031782333,0.11605079299357154|0.9741137516826333,0.22605839684202203,0.2742109271401185"/>
                    <discreteMappingEntry attributeValue="3432494" value="-0.8331534572169372,0.5530418761065615,0.3809656475790718|-0.0832181782132057,0.9965313516467382,0.3579595791935787|0.6456797877840008,0.7636082841661735,0.6548743235061354"/>
                    <discreteMappingEntry attributeValue="3432495" value="-0.02551542979950436,0.9996744284226473,0.48445955976184585|0.7540584372257261,0.6568073334309656,0.4537492549801503|0.9978150833669953,-0.06606859621118184,0.8339033737466729"/>
                    <discreteMappingEntry attributeValue="3432488" value="0.8845482380404371,0.46644872663515563,0.38024089192741534|0.8660365963322513,0.4999806134374104,0.5593908226621412|0.9388293986684358,0.34438257824091967,0.709961764391506"/>
                    <discreteMappingEntry attributeValue="3432489" value="0.9602620015110918,0.2791001405479976,0.007750522683666759|0.9998674604168069,0.016280712504223582,0.40713488492244737|0.9999977419661394,0.002125102967481703,0.7352140736870556"/>
                    <discreteMappingEntry attributeValue="3432490" value="0.9990565937139428,0.04342720986540286,0.3500617451755185|0.945347793617455,-0.32606371939025913,0.599755330347783|0.9922573869527702,-0.12419854281617171,0.8588169805757826"/>
                    <discreteMappingEntry attributeValue="3432491" value="-0.42830722922493275,0.9036331763462766,0.30689963898688893|0.4618177652892999,0.8869748314711061,0.29037288556610763|0.9448456487122157,0.3275159539771954,0.5114108274925977"/>
                    <discreteMappingEntry attributeValue="3432468" value="0.9327751677143415,0.3604587167700096,0.5773869938034488|0.9928548607618163,0.11932822575415426,0.29331117581476723|0.9942135966936095,0.10742124626700587,0.76559633192981"/>
                    <discreteMappingEntry attributeValue="3432469" value="0.998144934064584,-0.06088259686648699,0.4957283103262665|0.9809782776983906,0.19411753832124287,0.6405106117679096|0.9488855445499417,-0.31562037853117253,0.6449760810678123"/>
                    <discreteMappingEntry attributeValue="3432470" value="0.12733042622216825,-0.9918603543634965,0.3133841301113506|0.26257624909462085,-0.9649112463907754,0.43247045176681687|0.8836974593849599,-0.46805854364231736,0.36884260742176894"/>
                    <discreteMappingEntry attributeValue="3432471" value="0.22379774419548049,0.9746356086728076,0.570820227446965|0.6461731510505961,0.7631908403940285,0.9693107961110567|0.9582776241502831,0.28583910693410874,0.6730461735196462"/>
                    <discreteMappingEntry attributeValue="3432464" value="0.970458716479593,-0.24126723691537744,0.3046782488526758|0.9972164525111812,0.0745610276284811,0.40688355956869876|0.9941300694965641,-0.10819151964343866,0.6824709219066555"/>
                    <discreteMappingEntry attributeValue="3432465" value="0.9007106667470798,-0.43441949174505395,0.2580484580971103|0.9466195790478423,-0.32235286963711957,0.34058477682287286|0.9821297388481919,0.1882051435800372,0.5428229344010095"/>
                    <discreteMappingEntry attributeValue="3432466" value="0.6871499447292274,-0.726515625061581,0.4275958326039115|0.7918583418918379,-0.6107048111619141,0.6151207174399508|0.9881385215723769,-0.15356517243423784,0.9728196815842242"/>
                    <discreteMappingEntry attributeValue="3432467" value="0.6638118577083734,0.7478996039347516,0.3946217075426906|-0.3991899837119159,-0.9168682331197218,0.2334715701602868|0.7442421354059242,-0.6679099070132363,0.6246482621266749"/>
                    <discreteMappingEntry attributeValue="3432476" value="0.9344334672034282,-0.35613774774682283,0.2894257506645352|0.7242621463842287,-0.6895247227728025,0.5236214049586992|0.8541560932691508,-0.5200167000502789,0.73667623846378"/>
                    <discreteMappingEntry attributeValue="3432477" value="0.88811454318011,-0.45962219070883054,0.19121507084004155|0.6660178490330075,-0.7459358047241371,0.3363700876624119|0.9736190098083515,-0.228179805723042,0.5766823722929634"/>
                    <discreteMappingEntry attributeValue="3432478" value="0.9761177469355027,0.21724213246411928,0.17378945784355807|0.9748771067536803,-0.2227434100654234,0.3320514790867389|0.9999888968517342,0.004712342650073343,0.5654499166248894"/>
                    <discreteMappingEntry attributeValue="3432479" value="0.9919624034510313,-0.12653296068476974,0.22092040284926134|0.8326024651670852,-0.5538710454588618,0.3699155449054766|0.961618379864283,-0.27439039980872426,0.6404219959475269"/>
                    <discreteMappingEntry attributeValue="3432472" value="0.9738696165575124,0.22710783770298162,0.38072675961416524|0.978588249088668,0.20582769188225133,0.6955132475372253|0.9999536102259905,0.009632102366974392,0.8547089188862176"/>
                    <discreteMappingEntry attributeValue="3432473" value="0.9999999999999999,1.4901161193847656E-8,0.25|0.9999999999999999,1.4901161193847656E-8,0.5|0.9999999999999999,1.4901161193847656E-8,0.75"/>
                    <discreteMappingEntry attributeValue="3432474" value="0.8162779137786997,-0.5776593870760638,0.15352107579734794|0.9586456617357596,-0.2846023458006058,0.4450668492484519|0.9888555730196414,0.14887798933353638,0.6009751736843029"/>
                    <discreteMappingEntry attributeValue="3432475" value="0.92311576531061,0.3845221499926978,0.11002272587038239|0.9886186322313251,-0.15044334483473848,0.26964625828707595|0.9873749457731255,0.15840049387396987,0.48961578053583277"/>
                    <discreteMappingEntry attributeValue="3432452" value="0.9209802157085115,0.3896093457214593,0.2634087339020894|0.7309938440405914,0.6823840560672263,0.49596196161942663|0.9763838705665583,0.216042906149372,0.6887157464549737"/>
                    <discreteMappingEntry attributeValue="3432453" value="0.8386064468177105,0.5447377601706849,0.08525515513914807|0.9931576581840368,-0.11678127414273212,0.34322891014806756|0.9929027447442574,-0.11892913637675151,0.5435716685565268"/>
                    <discreteMappingEntry attributeValue="3432454" value="0.957758532265866,-0.28757363208739084,0.33041370953597693|0.9956474905524547,0.09319911242388307,0.61294928178989|0.9954269028963068,0.09552633663166764,0.901628951063396"/>
                    <discreteMappingEntry attributeValue="3432455" value="0.9492494022350672,-0.3145243589237051,0.14610301891740923|0.5487903898382955,-0.8359599918782786,0.6067652633160511|0.8835614280596815,-0.4683152814559186,0.8250987566841291"/>
                    <discreteMappingEntry attributeValue="3432448" value="0.9709146168071076,0.23942599455845953,0.49977417129268803|0.8215083448067462,0.5701964919331584,0.6975901823850471|0.9602488149181526,0.27914550587154985,0.8165669734886525"/>
                    <discreteMappingEntry attributeValue="3432449" value="0.7761236981395921,-0.6305806888782143,0.5537181278821274|0.9503309782672748,-0.31124111512710617,0.7950472530558766|0.991490726768009,-0.13017733571188714,0.9842247737672853"/>
                    <discreteMappingEntry attributeValue="3432450" value="0.8007875232536793,0.5989485308448782,0.5531596464184797|0.5446742710744161,0.8386476843284988,0.7882945418303474|0.7878210264592251,0.6159042379045081,0.8842710798914529"/>
                    <discreteMappingEntry attributeValue="3432451" value="0.988886493995525,0.14867246548449564,0.32109450830891073|0.8837694569717858,0.4679225864646789,0.6328467045654608|0.9446536693145434,0.32806926867746883,0.8571113945373257"/>
                    <discreteMappingEntry attributeValue="3432460" value="0.9261304346571322,0.3772034172721549,0.3563031300029279|0.783446660429436,0.6214590334543091,0.4730793940630715|0.9915483024229628,0.12973805903489063,0.469071684895436"/>
                    <discreteMappingEntry attributeValue="3432461" value="0.6808123627688081,0.7324578668436519,0.3442271643103516|0.8267322210465402,0.562595622702003,0.16536790516285835|0.8508247822099998,0.5254495123009503,0.45365623891806406"/>
                    <discreteMappingEntry attributeValue="3432462" value="0.6579185396110953,-0.7530891017907534,0.2824496646286223|0.7599588051913123,-0.6499712412193274,0.3869417991579123|0.9822200453738054,-0.18773327479666393,0.5912163509801354"/>
                    <discreteMappingEntry attributeValue="3432463" value="0.9631887639927256,0.26882597515523976,0.27324244583727675|0.9978286595455516,0.0658632385289986,0.4733215014002433|0.9987528186722416,0.049928020131509473,0.7534872116547227"/>
                    <discreteMappingEntry attributeValue="3432456" value="-0.5802099854776276,0.814466925511436,0.20185985297491152|0.02872226626735649,0.9995874306034801,0.8079229899560239|0.7435950950634205,0.6686301927056709,0.6544264242060372"/>
                    <discreteMappingEntry attributeValue="3432457" value="0.8086647332743043,0.5882697928318249,0.1364409490877987|0.995145547836273,-0.09841411799962527,0.569669384181023|0.9922678085320211,-0.12411525349875521,0.8681702756034186"/>
                    <discreteMappingEntry attributeValue="3432458" value="-0.9925293300270772,0.12200626638005616,0.182288439915398|0.6020526561412608,0.7984563853043276,0.36183941595904523|0.9245599292780111,0.38103666119343305,0.64392531540974"/>
                    <discreteMappingEntry attributeValue="3432459" value="0.9934023825175772,0.1146808894646413,0.23715190365542027|0.9090402672571366,0.4167082822611925,0.3116092206102225|0.9759368591080567,0.21805331236718475,0.5277985594693291"/>
                    <discreteMappingEntry attributeValue="3431604" value="0.9097896642948157,-0.4150695926496262,0.2842080908660552|0.9685129000430674,-0.24896337572054092,0.5290919183891731|0.9928574024069255,-0.11930707642789806,0.7833909016532926"/>
                    <discreteMappingEntry attributeValue="3431605" value="1.0,0.0,0.25|1.0,0.0,0.5|1.0,0.0,0.7499999999999999"/>
                    <discreteMappingEntry attributeValue="3431606" value="0.9164350021891277,0.40018356633251895,0.3153544833133404|0.9713935841726874,0.2374752716139937,0.4435554391485848|0.9923864721253245,0.12316285942869529,0.6569539213212306"/>
                    <discreteMappingEntry attributeValue="3431607" value="0.7282165180914628,0.6853471403447644,0.47210169841959515|0.8401279165325171,0.5423883146443441,0.6659346001174975|0.9559556693779186,0.2935110869868726,0.778893344212772"/>
                    <discreteMappingEntry attributeValue="3431600" value="0.88384138475555,0.4677867105780068,0.68876565004291|0.9325059509952779,0.36115460866281685,0.6496226253082265|0.9988504941264594,-0.04793422976671089,0.845319054119353"/>
                    <discreteMappingEntry attributeValue="3431601" value="0.8335431858197746,0.55245430342556,0.33897093567306186|0.6274195491572316,0.7786813914145735,0.24216837112038292|0.9925352707204916,0.1219579287123243,0.45141332081402336"/>
                    <discreteMappingEntry attributeValue="3431602" value="-0.4142947347283676,0.9101427760392056,0.23739197183705185|0.8174906004030962,-0.5759419400014079,0.2777639379359627|0.9959586105431867,-0.08981339590999213,0.7832538506759655"/>
                    <discreteMappingEntry attributeValue="3431603" value="0.3661562224910165,-0.930553394884522,0.26714199577542863|0.2829006465239713,-0.9591492189416196,0.24973415291436493|0.8247172183524176,-0.5655453206888469,0.3272617994629347"/>
                    <discreteMappingEntry attributeValue="3431612" value="0.8352200012964522,-0.5499159476086817,0.26829928903363714|0.9591478560078296,-0.28290526738748395,0.504826055412651|0.9917894012082671,-0.12788191291557624,0.7615644352648572"/>
                    <discreteMappingEntry attributeValue="3431613" value="0.916429105645903,0.4001970693608968,0.3228813930601005|0.9940116059158526,0.10927455012301715,0.4641521581302186|0.9947199631621487,-0.1026264823848771,0.6306146933501909"/>
                    <discreteMappingEntry attributeValue="3431614" value="0.2384876227455583,0.9711455368775436,0.3306088721546916|0.9951164424177048,0.09870798361799717,0.3684910196567035|0.9978676086260597,0.06527048073140647,0.6241804098366971"/>
                    <discreteMappingEntry attributeValue="3431615" value="0.8506445975939759,0.5257411612040499,0.6421579207235928|0.8488083103250387,0.5287007209406404,0.8042468807731599|0.9542026121404505,0.299161118771041,0.8497485678346199"/>
                    <discreteMappingEntry attributeValue="3431608" value="0.981237020985626,-0.19280536467446668,0.3090024297069425|0.9999526725944595,0.00972895529836769,0.5420026368752645|0.9925652945450764,0.12171333560726125,0.751802374264083"/>
                    <discreteMappingEntry attributeValue="3431609" value="0.7485648912794345,-0.6630615382781665,0.27542690016106125|0.9131776128688174,-0.4075618325545319,0.5685861888471787|0.9371304905303455,-0.3489791451051969,0.7396106110621766"/>
                    <discreteMappingEntry attributeValue="3431610" value="0.8621667682503504,-0.5066245786820321,0.33901902680781243|0.941653249263683,-0.3365845482952955,0.5902114710855977|0.9773442525331415,-0.21165588118555773,0.8251036605938572"/>
                    <discreteMappingEntry attributeValue="3431611" value="0.9950745749109643,0.09912916001744246,0.48137641171973555|0.9980511283426623,-0.06240148406839882,0.6785901619996859|0.9938824398982095,-0.11044317843118272,0.8287624301262815"/>
                    <discreteMappingEntry attributeValue="3431588" value="0.8403508653852454,-0.5420428239966554,0.2975766668683527|0.9860963242499978,-0.16617472521609042,0.4990359637914248|0.9798994099187178,-0.19949222150487125,0.656250579651866"/>
                    <discreteMappingEntry attributeValue="3431589" value="0.5055307277279647,0.8628086017900114,0.23996624916368464|0.6125262620089204,0.7904502377438946,0.2524015821168233|0.9636180745532247,0.26728300805389016,0.6469066861214847"/>
                    <discreteMappingEntry attributeValue="3431590" value="0.6074313921914567,-0.7943721443884779,0.28150796833420827|0.8000051791911413,-0.5999930943497183,0.6860318650184504|0.995939451394567,-0.09002560277992581,0.9133363608973459"/>
                    <discreteMappingEntry attributeValue="3431591" value="-0.30557493346559633,-0.9521680314091081,0.19977234077494244|-0.049708790395763446,-0.998763753926518,0.24632236505217475|0.85320020143299,-0.521583565955356,0.4347307428415811"/>
                    <discreteMappingEntry attributeValue="3431584" value="0.9999879512618371,0.0049089032536413345,0.2775546085429287|0.9818839715982315,0.18948315576452526,0.4578799751736212|0.9959242658324412,0.09019344059360962,0.6033900089457443"/>
                    <discreteMappingEntry attributeValue="3431585" value="0.9481339458218782,-0.31787107572133044,0.390389801979622|0.9932234658709517,-0.11622025143362279,0.641056312064304|0.9986178784196861,0.052557900458114516,0.862676697518222"/>
                    <discreteMappingEntry attributeValue="3431586" value="1.0,0.0,0.25|1.0,0.0,0.5|1.0,0.0,0.75"/>
                    <discreteMappingEntry attributeValue="3431587" value="0.9072465371804176,-0.4205992401017163,0.24032587677436382|0.941405944198219,-0.3372756264959859,0.45810829768766653|0.9991844363558451,-0.04037898146625498,0.6929869621964132"/>
                    <discreteMappingEntry attributeValue="3431596" value="0.9187000880014491,-0.3949558814679555,0.43611587934805623|0.9566452530373335,-0.2912556606164697,0.5417086124827467|0.9770850154938869,-0.21284941272484342,0.7187339003907373"/>
                    <discreteMappingEntry attributeValue="3431597" value="0.15575011003666012,-0.9877964887685966,0.2997412697068424|0.20001594237128284,-0.9797926427552555,0.7068594763210915|0.7596063167891033,-0.6503831512993649,0.8712894369838449"/>
                    <discreteMappingEntry attributeValue="3431598" value="0.8420563488389664,0.5393895673629486,0.23130655944411893|0.994374349680916,-0.10592286201125528,0.5198035467494231|0.9831587643265066,-0.18275350647245217,0.710136617495536"/>
                    <discreteMappingEntry attributeValue="3431599" value="-0.9999082475105766,0.013546090222919156,0.48389273442910674|-0.9858982574606394,0.1673458273637998,0.6416731215955878|0.3068369837761763,0.9517620844450249,0.08537033733836778"/>
                    <discreteMappingEntry attributeValue="3431592" value="0.6222332048706283,-0.782831935191984,0.2965175264725636|0.6899934098373876,-0.7238156494446462,0.5806229036312971|0.9323324844735122,-0.3616021825092432,0.5911354339582575"/>
                    <discreteMappingEntry attributeValue="3431593" value="1.0,0.0,0.25|1.0,0.0,0.5|1.0,0.0,0.75"/>
                    <discreteMappingEntry attributeValue="3431594" value="-0.1646298039862669,-0.9863554266284762,0.206834450329999|-0.1827723398271486,-0.9831552633201479,0.4751803651824708|0.47434521649532363,-0.8803389208640071,0.5919682071459917"/>
                    <discreteMappingEntry attributeValue="3431595" value="0.8006991274138374,-0.5990666969200669,0.42261191234831696|0.7628935707391564,-0.6465240905989967,0.3845763139735367|0.9979571799436532,-0.0638863600380474,0.5002140214505313"/>
                    <discreteMappingEntry attributeValue="3431572" value="0.9755662581140558,0.21970543013166374,0.35872263601118387|0.9846588857019182,0.17449034015743348,0.6416642465311783|0.9917766416347087,0.127980831016909,0.9011595750739666"/>
                    <discreteMappingEntry attributeValue="3431573" value="0.9452729824533936,-0.32628053672210694,0.21782657752668833|0.9368361485656567,-0.34976853880911996,0.4538669447408367|0.9457889096393018,-0.3247819859587359,0.743426839732318"/>
                    <discreteMappingEntry attributeValue="3431574" value="0.9960174111101051,-0.0891589410296234,0.31977574952761467|0.988359415898602,-0.15213699420119456,0.598194911163927|0.9906520000013419,-0.13641339704494307,0.7483007657182207"/>
                    <discreteMappingEntry attributeValue="3431575" value="0.9016450216653091,-0.4324768836668201,0.3492983449090579|0.9198993892466999,-0.39215445128615906,0.7243387075529355|0.9633510602106621,-0.26824379730199416,0.8391331313185192"/>
                    <discreteMappingEntry attributeValue="3431568" value="0.9023599984898153,-0.4309831007423151,0.29595793033810003|0.9499153893312536,-0.3125072048955877,0.5185589129077375|0.9844089716172826,-0.17589478843730458,0.7327202227715458"/>
                    <discreteMappingEntry attributeValue="3431569" value="0.998922452349733,0.04641049656699917,0.3111267341877934|0.9728108767653982,-0.23160094569525652,0.5137294321878015|0.9993719928249382,0.035434728122447204,0.6735465700109716"/>
                    <discreteMappingEntry attributeValue="3431570" value="0.8766982795287477,0.4810406704960962,0.12029137041452359|0.9901367864366853,0.14010404756763367,0.4095059101752827|0.9992677485926832,0.038261816769595496,0.8257807599899768"/>
                    <discreteMappingEntry attributeValue="3431571" value="0.9934517049067038,0.1142528337415033,0.2973392122832613|0.9929435091384128,0.11858831164956675,0.567296422501901|0.994803279575109,0.10181569106285941,0.8071735277606968"/>
                    <discreteMappingEntry attributeValue="3431580" value="0.7615566445919867,-0.6480983544785425,0.4873835635581678|0.8861523482635574,-0.4633940177289549,0.7983371416191432|0.9532431013544522,-0.30220454946963576,1.0681637852981682"/>
                    <discreteMappingEntry attributeValue="3431581" value="0.9996126865680717,0.027829424215425322,0.4033958598958018|0.9731091043139944,0.2303446789079693,0.661150013071665|0.9901986474327675,0.13966616849587354,0.877865015456594"/>
                    <discreteMappingEntry attributeValue="3431582" value="0.8291314633836193,0.5590536793791254,0.21720251708962285|0.8000093488569203,0.599987534655118,0.41987155139341825|0.958288695022114,0.28580198913375987,0.6718222380359259"/>
                    <discreteMappingEntry attributeValue="3431583" value="0.9511018194666109,0.30887753075823166,0.3464519930353539|0.934336370255559,0.35639240622895835,0.6795024664714572|0.9704282186763002,0.24138987633441214,1.001773805383139"/>
                    <discreteMappingEntry attributeValue="3431576" value="0.9768488023488587,-0.21393087049231657,0.4586519887266281|0.9921943456339372,-0.12470116475816594,0.7812976824629598|0.9974485043349052,-0.07138964350702878,0.9574306442017477"/>
                    <discreteMappingEntry attributeValue="3431577" value="0.9508761018599555,0.3095717023754198,0.3042723245024633|0.9687342617344342,0.24810064518626446,0.5717411925413161|0.992742929630931,0.1202558758140172,0.801864278733582"/>
                    <discreteMappingEntry attributeValue="3431578" value="0.9938672861820176,-0.11057946218530618,0.3073957238935494|0.999140571029049,0.04145020293974403,0.564834438643392|0.9996160026827459,0.027710055585808826,0.8488414390201131"/>
                    <discreteMappingEntry attributeValue="3431579" value="0.9999832001349456,0.005796503072835525,0.23456803157112707|0.9965234649600331,-0.08331256678346746,0.49811588513015403|0.9991695988067064,-0.04074448208586464,0.7251984962371957"/>
                    <discreteMappingEntry attributeValue="3431567" value="0.5503763207516822,0.834916705759228,0.3905059881056332|0.7731391736131408,0.6342364056286818,0.6396561862533314|0.9500009156810814,0.3122471140060496,0.6896384540271693"/>
                    <discreteMappingEntry attributeValue="3431668" value="0.9998130924126332,0.019333397018823573,0.21433527052908044|0.9998143014228194,0.019270772439103995,0.42793190358098154|0.9998425999895123,0.017741906498797994,0.6429457087196823"/>
                    <discreteMappingEntry attributeValue="3431669" value="0.9496400794509848,0.3133428146620363,0.2193123933036778|0.9502693004727986,0.3114293765509896,0.4385042451643443|0.9721223883001223,0.23447401170634286,0.6356903423935202"/>
                    <discreteMappingEntry attributeValue="3431670" value="0.943463668842358,-0.33147595022040055,0.2240809177133686|0.9429365489056444,-0.33297246843832795,0.44792159998773123|0.9809647439625212,-0.1941859189090322,0.725952854962842"/>
                    <discreteMappingEntry attributeValue="3431671" value="0.9804700291460138,-0.1966685586117285,0.28783878997368745|0.9798465893765241,-0.19975149883591187,0.575045389670081|0.9815673093954906,-0.1911167630693267,0.8657118333262512"/>
                    <discreteMappingEntry attributeValue="3431664" value="0.9999458206777129,0.010409404842511143,0.4353658954107681|0.9997111185994241,-0.024034960967063167,0.8013139037477739|0.9987857398538205,-0.04926505723792952,0.9309393409101504"/>
                    <discreteMappingEntry attributeValue="3431665" value="0.9937028331673071,-0.11204766555027816,0.4800430641222774|0.9888650479138325,-0.1488150429707086,0.893252568143791|0.9850993989944579,-0.17198597065097462,1.0384843576001854"/>
                    <discreteMappingEntry attributeValue="3431666" value="0.9894683291683003,-0.14474952702130714,0.3201663928557702|0.9907831109881958,-0.13545784207845787,0.4670980795608732|0.9977496831172412,-0.0670490107268164,0.6272849630092232"/>
                    <discreteMappingEntry attributeValue="3431667" value="0.9826741476584953,0.18534162922465602,0.2891717759374857|0.9813890103665149,0.19203023285887155,0.5804550065137116|0.9945032972175274,0.10470526167994793,0.8418026650284908"/>
                    <discreteMappingEntry attributeValue="3431676" value="0.8655313152617236,0.500854811598442,0.18877826698024516|0.8970817806909723,0.4418645479695268,0.33039857467762135|0.9072655109527936,0.4205583106247769,0.43930320271712453"/>
                    <discreteMappingEntry attributeValue="3431677" value="0.3367844880188729,-0.9415817588663586,0.4467079688388841|0.6716828389911147,-0.740838824444856,0.7016272225875565|0.8614844048231419,-0.5077840291369127,0.7300935417190507"/>
                    <discreteMappingEntry attributeValue="3431678" value="0.8881117463205028,0.4596275949587305,0.4077232860183076|0.7202738039480318,0.6936898783651325,0.6557419399608919|0.8692166530648074,0.494431400737063,0.7193225024472077"/>
                    <discreteMappingEntry attributeValue="3431679" value="0.8110517099377714,-0.584974464234993,0.5492870635935299|0.959662001075441,-0.2811562620534715,0.8742528409879029|0.9999794482804905,0.006411163439338514,0.9076038356044042"/>
                    <discreteMappingEntry attributeValue="3431672" value="0.6823594524722552,0.7310168107655008,0.3826862903230961|0.6656409265383392,0.7462721734844342,0.7174106873044666|0.938035103532956,0.3465402495236541,0.7256587997425963"/>
                    <discreteMappingEntry attributeValue="3431673" value="0.9765042959514015,0.21549793499812847,0.4374191409483726|0.9663609778653076,0.2571895418931463,0.8398437610645197|0.9971143092990755,0.07591478242758495,0.9224568451737838"/>
                    <discreteMappingEntry attributeValue="3431674" value="0.9997008323338639,-0.024459064392977285,0.336254842864783|0.9416670201600273,0.33654601935386885,0.5305957407412909|0.9896221201598956,0.1436943258804368,0.7461834258932328"/>
                    <discreteMappingEntry attributeValue="3431675" value="0.703993599636767,-0.7102063162704675,0.33229860695802604|0.9193581724519944,-0.39342159415279815,0.5266004193726691|0.9782861790411579,-0.20725865940184882,0.7595570211655468"/>
                    <discreteMappingEntry attributeValue="3431652" value="0.9546170373332132,-0.29783604891476545,0.44554652946657963|0.9959786372135039,-0.089591038694345,0.7224670536172414|0.9978226818994582,-0.06595373747538963,0.9407653473405914"/>
                    <discreteMappingEntry attributeValue="3431653" value="0.922177684391848,-0.386766490805097,0.4075536047745177|0.7967561688056021,-0.6043009245981831,0.7136757475363008|0.9503558256783976,-0.31116523681017316,0.9184853956389969"/>
                    <discreteMappingEntry attributeValue="3431654" value="0.8450603346321482,-0.5346709556646981,0.3180870619516813|0.9554029861198353,-0.29530515422745635,0.489003387219099|0.9999969241372035,0.002480265334998844,0.8861704935729463"/>
                    <discreteMappingEntry attributeValue="3431655" value="1.0,0.0,0.25|1.0,0.0,0.5|1.0,0.0,0.75"/>
                    <discreteMappingEntry attributeValue="3431648" value="0.5617975073994542,-0.8272747794292777,0.2578333202479284|0.7316162053976901,-0.6817167505639603,0.4157866922400094|0.8973677280246718,-0.4412835377621045,0.7266679461951183"/>
                    <discreteMappingEntry attributeValue="3431649" value="0.7565308246288723,-0.6539580348817181,0.2842846012688686|0.8479238665725751,-0.5301180212901782,0.4663980988428875|0.9647076720791341,-0.2633231995697642,0.8113425742025493"/>
                    <discreteMappingEntry attributeValue="3431650" value="0.974889338899469,-0.22268986708010802,0.3612742572577554|0.9999993160925615,0.0011695359802881982,0.5899039708830079|0.9997621380839241,0.021809797198980463,0.7616715048878719"/>
                    <discreteMappingEntry attributeValue="3431651" value="0.9249719019429642,0.38003549915240215,0.43635460310478935|0.9579121947365954,0.2870613648245249,0.671474244582491|0.9532495995419109,0.30218405148714667,0.8378869979127688"/>
                    <discreteMappingEntry attributeValue="3431660" value="0.8994524047163228,-0.4370187314635658,0.21373282238184096|0.9340667126983986,-0.3570985525437023,0.5208001665927098|0.9548707428816836,-0.2970216564302705,0.8940199202304631"/>
                    <discreteMappingEntry attributeValue="3431661" value="0.9912285903799022,-0.13215854725848072,0.19309192953463347|0.9973922607792982,-0.07217117248292693,0.3981446315339082|0.9998122386978547,-0.01937749596784735,0.6918290076257948"/>
                    <discreteMappingEntry attributeValue="3431662" value="0.9551448761255186,0.2961389295772641,0.2295567700527496|0.977147055116842,0.2125644200624446,0.4558718437449124|0.9753267723691267,0.22076613666960282,0.6080872663046767"/>
                    <discreteMappingEntry attributeValue="3431663" value="0.9342145686316541,-0.35671156381083646,0.48342720710134085|0.9229297855052108,-0.38496832470646936,0.8880457654188584|0.9764654365033094,-0.21567394676780366,0.9854372314913377"/>
                    <discreteMappingEntry attributeValue="3431656" value="0.6947046729903674,0.7192950836237841,0.5258699604787375|0.8467864379779209,0.5319330112492219,0.485426738464057|0.9809386749123241,0.19431756498385241,0.6267593486130904"/>
                    <discreteMappingEntry attributeValue="3431657" value="0.974269592884504,0.22538580341419656,0.3866714323880354|0.9139108429122575,0.4059149802697689,0.38290065407545115|0.9823539077646004,0.18703154787259543,0.41998247340746103"/>
                    <discreteMappingEntry attributeValue="3431658" value="0.9942770764555762,0.10683208897588935,0.25628563556004547|0.9624801654359262,0.2713520428197145,0.5322057958070765|0.9966641633197548,-0.08161216547876352,0.7801344983292454"/>
                    <discreteMappingEntry attributeValue="3431659" value="0.989849743356261,-0.14211785805290023,0.1698929373047617|0.9998828133346469,0.015308807856644423,0.4378251040094536|0.9990774177695028,0.042945468946356216,0.7643732470406847"/>
                    <discreteMappingEntry attributeValue="3431636" value="0.8390782388244276,-0.5440107619627547,0.3711761433076877|0.9470983182882617,-0.3209435705782972,0.4827537888183708|0.9881069465399127,-0.15376820932679838,0.6541743762920467"/>
                    <discreteMappingEntry attributeValue="3431637" value="0.8922945916302193,-0.45145360974020377,0.7083427976477685|0.9659524569447848,-0.25871963768205464,0.9024185453482052|0.9679798036820951,-0.25102808540793314,0.8700910570519802"/>
                    <discreteMappingEntry attributeValue="3431638" value="0.6959749216182424,-0.7180660892135774,0.41012164128792283|0.8442458927006534,-0.5359560361243044,0.5199965454797721|0.9429383767565869,-0.332967292146921,0.6945456199551827"/>
                    <discreteMappingEntry attributeValue="3431639" value="0.8698999574978535,-0.4932282067615686,0.5754479905127599|0.9635365477277458,-0.2675767575722852,0.7215279828839439|0.9991952035156951,0.040111660040798504,0.9121129776002066"/>
                    <discreteMappingEntry attributeValue="3431632" value="0.5554923042416438,-0.8315216773652441,0.5259943638670646|0.792077406526526,-0.6104206599306846,0.7028066638227066|0.9003082914666669,-0.435252777494149,0.9328389592666161"/>
                    <discreteMappingEntry attributeValue="3431633" value="0.9006907344987855,-0.434460816171077,0.38094613348484724|0.9927764147035775,-0.1199791248855832,0.5102175171409536|0.9965187011077635,0.08336952886094451,0.680739182520546"/>
                    <discreteMappingEntry attributeValue="3431634" value="0.5354711251570894,-0.844553535380085,0.3393163644640546|0.717588915507167,-0.6964669039812645,0.4219065384482845|0.885004969189809,-0.4655815766429609,0.551111991575163"/>
                    <discreteMappingEntry attributeValue="3431635" value="0.7546701837862787,-0.656104346658353,0.35905768639249336|0.9241024165583559,-0.3821448988420582,0.48425974968180696|0.9820208638953971,-0.1887724102567373,0.6444382114507725"/>
                    <discreteMappingEntry attributeValue="3431644" value="1.0,0.0,0.25|1.0,0.0,0.5|1.0,0.0,0.75"/>
                    <discreteMappingEntry attributeValue="3431645" value="1.0,0.0,0.25|1.0,0.0,0.5|1.0,0.0,0.75"/>
                    <discreteMappingEntry attributeValue="3431646" value="0.5041614054284663,-0.8636094471903336,0.19415740008443405|0.8925060930529414,-0.45103533549310115,0.43444766756434844|0.9547076350943947,-0.29754551163220067,0.7109408385723278"/>
                    <discreteMappingEntry attributeValue="3431647" value="0.985288791167752,-0.17089762432283817,0.5224284453367912|0.9656579095387423,-0.2598168619340673,0.817284036560483|0.9702698471889268,-0.24202566730819391,1.0170516407624857"/>
                    <discreteMappingEntry attributeValue="3431640" value="0.9879855844753409,-0.15454606067098256,0.367642891726687|0.9999886661371853,0.00476105000740124,0.5245662272666433|0.9977583470667214,0.06691995859744634,0.7942528011062776"/>
                    <discreteMappingEntry attributeValue="3431641" value="0.999801291556547,0.019934327223675958,0.6213287423787779|0.9721092891349226,0.2345283138079399,0.7896447708594376|0.9766100909846521,0.21501797642743617,0.7669963939983969"/>
                    <discreteMappingEntry attributeValue="3431642" value="0.622922744448516,0.7822833594348846,0.145745261818539|0.8715929832141922,0.4902302230705333,0.38178605216755745|0.9865166181791821,0.16366111956206883,0.6169223109793451"/>
                    <discreteMappingEntry attributeValue="3431643" value="0.5433353198549017,-0.8395157712623222,0.29328099914114086|0.7780809093678049,-0.6281640697121809,0.5367156512377905|0.9214620238872523,-0.3884684524303214,0.6416116521231667"/>
                    <discreteMappingEntry attributeValue="3431620" value="0.8301799345668622,0.5574955392131495,0.40399179396909124|0.6906263160502324,0.7232117888826789,0.6731255547570478|0.8763625567217594,0.4816520208367249,0.7328413446331931"/>
                    <discreteMappingEntry attributeValue="3431621" value="0.4385614588474927,-0.8987011999622337,0.4176946422023872|0.6706089785867522,-0.7418110256924152,0.6896436793255579|0.8445818896706051,-0.5354264017028203,0.7048185758600101"/>
                    <discreteMappingEntry attributeValue="3431622" value="0.8513419218998112,-0.5246112198723316,0.5099011129292851|0.9580030534004159,-0.2867579984507491,0.8404013364683398|0.9996149636735727,-0.027747511598013436,0.8625826039574721"/>
                    <discreteMappingEntry attributeValue="3431623" value="0.9938767725396107,0.1104941672951424,0.6093398121467015|0.9410129490404039,0.3383705509323798,1.0241647340954079|0.989667623302481,0.14338059627027117,0.9928678271204804"/>
                    <discreteMappingEntry attributeValue="3431616" value="0.16480835827325457,-0.9863256080236762,0.16092383120932813|0.7009724893307044,-0.7131883125805663,0.2775264284250611|0.9700207604197171,-0.24302206557173744,0.5759274578984702"/>
                    <discreteMappingEntry attributeValue="3431617" value="0.8594895381526731,0.5111533368824902,0.1953192370731702|0.8949928039373557,0.44608057669029927,0.34123753080284425|0.9190218482426974,0.394206598692331,0.4648718416827866"/>
                    <discreteMappingEntry attributeValue="3431618" value="0.971806475838968,-0.23577992602731343,0.29721223620982284|0.9997318405835127,0.023157005926973968,0.4980043593346014|0.9852227873161319,0.1712777257936126,0.7184632520012566"/>
                    <discreteMappingEntry attributeValue="3431619" value="0.7947524675674229,-0.6069336992584052,0.31170141470372004|0.9316170041680985,-0.3634415462558694,0.5199673775482231|0.9775609904872965,-0.21065258098940018,0.7491892449564793"/>
                    <discreteMappingEntry attributeValue="3431628" value="0.30285435835550645,-0.9530368500876943,0.1611885366380483|0.7893441630818474,-0.6139509688962287,0.4624863093078141|0.9242109073958158,-0.3818824408775596,0.8148077293572377"/>
                    <discreteMappingEntry attributeValue="3431629" value="0.5560915675524384,0.8311210311964629,0.26417469524749254|0.7683609805192386,0.64001672135618,0.6507232135111974|0.9778161834572564,0.20946482131633723,0.8921463917970934"/>
                    <discreteMappingEntry attributeValue="3431630" value="0.38933048628616385,-0.9210981339945159,0.11217243598781235|0.8489027393897989,-0.528549088596788,0.315481459869903|0.955169425785985,-0.29605973728906765,0.5370238037386523"/>
                    <discreteMappingEntry attributeValue="3431631" value="0.9987635400825055,-0.04971308682692642,0.37474105124977475|0.9613090292510615,0.2754722314143146,0.5069374629189451|0.9802807021446811,0.19761008325166762,0.7062345835686895"/>
                    <discreteMappingEntry attributeValue="3431624" value="-0.046830682956778814,0.9989028416887208,0.2285984836661797|0.9307173821375191,0.36573918929625693,0.5244173619273352|0.9827683292634524,-0.1848415835160543,1.0855819141094225"/>
                    <discreteMappingEntry attributeValue="3431625" value="0.44785639599656635,0.8941055019207559,0.37562103494400945|0.9541193423087249,0.29942658638198166,0.3408291475795978|0.910216111505984,-0.41413358998628214,0.5840028705734446"/>
                    <discreteMappingEntry attributeValue="3431626" value="-0.06863383991184628,0.9976419177334898,0.21436223827402368|0.17993444674705802,0.9836786034441484,0.530643647992845|0.6158472005068643,0.7878656139392417,0.7188543458319159"/>
                    <discreteMappingEntry attributeValue="3431627" value="0.9684929102166768,0.24904112684460764,0.4418561747556605|0.9525136204759781,0.304495981595397,0.5632251418361681|0.9997741358224227,0.02125270195828991,0.7236298917454151"/>
                    <discreteMappingEntry attributeValue="3431732" value="0.9829344346583756,-0.18395623708594266,0.12521589822075804|0.9949359120096687,0.10051134758567713,0.48815982167487565|0.9986521713702123,-0.051902221701580833,0.8019529379461984"/>
                    <discreteMappingEntry attributeValue="3431733" value="0.34226767651133844,0.9396024891492837,0.2299186391630825|0.9028520781579087,0.42995130534276266,0.28791805784702507|0.9945167977323657,0.1045769526624335,0.5333606328826528"/>
                    <discreteMappingEntry attributeValue="3431734" value="0.7936628965408989,0.6083577949318233,0.4869420476639373|0.8473041238889751,0.5311080131580923,0.6092414732732626|0.9555538855905993,0.29481650519044533,0.7049754455780122"/>
                    <discreteMappingEntry attributeValue="3431735" value="0.9941675907263634,-0.10784619394924416,0.32494056140041294|0.9937803748877971,-0.11135783083317215,0.4687310423814163|0.999373786650388,-0.035384100328604555,0.6680680453624306"/>
                    <discreteMappingEntry attributeValue="3431728" value="0.8543926046998394,0.5196280179457455,0.3924351119762549|0.7786515331428138,0.6274566040248087,0.5945454269534904|0.9439759589326193,0.33001422538618214,0.7372244084853026"/>
                    <discreteMappingEntry attributeValue="3431729" value="0.5248673793410097,-0.8511840189428491,0.23420434887115618|0.8560080569937241,-0.5169624806132737,0.3649677725022031|0.9842260868347383,-0.17691526218497408,0.5820094290153662"/>
                    <discreteMappingEntry attributeValue="3431730" value="0.8124610913252991,-0.5830154158189165,0.07468605793462271|0.9975075818101429,-0.07055936671542001,0.33338151308167624|0.9946546503782115,0.10325757348009758,0.5587658397454577"/>
                    <discreteMappingEntry attributeValue="3431731" value="0.3546388756730251,-0.9350033517915177,0.09554473645083797|0.7800145443288465,-0.625761384742988,0.42552691108196206|0.8930759128387826,-0.4499060056358163,0.7002235172017609"/>
                    <discreteMappingEntry attributeValue="3431740" value="0.9253681462551279,0.37906964254124637,0.15355345764660047|0.9759943892767354,0.2177956659356017,0.32015573429305594|0.994163520800002,0.10788370549134808,0.5291291098798591"/>
                    <discreteMappingEntry attributeValue="3431741" value="0.6092478219628122,0.7929798808504346,0.2946952483697558|0.9258744390969782,0.3778313420388203,0.4627884980848505|0.9847857197653853,0.17377308809528585,0.7255076214695484"/>
                    <discreteMappingEntry attributeValue="3431742" value="0.9434866607638466,0.3314105021882775,0.23232331738313167|0.8945441574929242,0.4469795859938958,0.4660096442130831|0.9989369400222227,0.04609761229216022,0.5745640779037107"/>
                    <discreteMappingEntry attributeValue="3431743" value="0.9808744428857588,0.19464153537606607,0.24347188850821533|0.9844359453966758,0.1757437606600962,0.45974096565448214|0.9964745849525573,0.0838951818856647,0.6996196842098509"/>
                    <discreteMappingEntry attributeValue="3431736" value="0.9816427479728926,-0.19072890539251774,0.3845551531649444|0.9961831532480296,-0.08728760040700335,0.5612811566952397|0.9997683461776457,0.021523335736248875,0.7036907088052456"/>
                    <discreteMappingEntry attributeValue="3431737" value="0.8610400450770792,-0.5085371577118641,0.4786741505137962|0.9021778445876385,-0.4313642738280522,0.6980071324764294|0.9486162773096515,-0.3164287572632715,0.8706517344646675"/>
                    <discreteMappingEntry attributeValue="3431738" value="0.9978960973500264,0.06483347047310267,0.5097816311931413|0.9872717589553942,0.15904236532799051,0.7324981899236088|0.9957900261523698,0.09166364500423663,0.8817039263781712"/>
                    <discreteMappingEntry attributeValue="3431739" value="0.6823600088331961,-0.7310162914362173,0.43481963534979934|0.839732364847084,-0.5430005114438878,0.5521783608985336|0.9538949769523314,-0.3001405886332456,0.6992709132496593"/>
                    <discreteMappingEntry attributeValue="3431716" value="0.6236024447731542,0.7817416394646924,0.22240910090693847|0.9496257560228608,0.313386220976625,0.5126615046930998|0.9945311403257499,0.10444046592371971,0.8490470295223411"/>
                    <discreteMappingEntry attributeValue="3431717" value="0.6894805145439752,0.7243042317038989,0.4117738537028366|0.8643376567830959,0.5029119356972025,0.7107182608910391|0.9854853375591125,0.1697605650791788,0.7672879011471537"/>
                    <discreteMappingEntry attributeValue="3431718" value="1.0,0.0,0.25|1.0,0.0,0.5|1.0,0.0,0.75"/>
                    <discreteMappingEntry attributeValue="3431719" value="0.8631114185358265,0.5050135435739058,0.32047152221888703|0.9689909977438723,0.24709602645800446,0.5615333401698147|0.9975554965533621,0.06987868985731807,0.7631941230696306"/>
                    <discreteMappingEntry attributeValue="3431712" value="0.9993446922554522,-0.03619649238331731,0.3988881410983585|0.9977403155142668,-0.0671882638374543,0.5996720051119278|0.9994928010600719,-0.03184557471755816,0.6984004399842928"/>
                    <discreteMappingEntry attributeValue="3431713" value="0.9767531579972403,0.21436713447358993,0.35208018062066276|0.9988619803615582,-0.04769427835900456,0.560925254565708|0.9946192421943041,-0.10359808423338854,0.7823836021514786"/>
                    <discreteMappingEntry attributeValue="3431714" value="0.789753088422098,0.6134248603763608,0.4339122603558186|0.9692871044443363,0.24593191976218598,0.6722538437248798|0.9992054018333355,0.03985680553032975,0.7712514838146611"/>
                    <discreteMappingEntry attributeValue="3431715" value="0.9894535466878875,-0.14485054002923273,0.3634945008704575|0.9175530084899701,-0.3976134763951102,0.5737036119723827|0.9843437391420613,-0.17625947694188127,0.7789653473358593"/>
                    <discreteMappingEntry attributeValue="3431724" value="0.9796609345591737,0.2006600441010776,0.33216119981540027|0.9734471579638612,0.22891184034925222,0.5635321012867575|0.9999977422409415,0.0021249736514838283,0.7482841609721654"/>
                    <discreteMappingEntry attributeValue="3431725" value="0.999814706455656,0.019249746881206377,0.41223975048665945|0.9998727176523571,0.015954575973363257,0.6991787360446161|0.9998511967133846,0.017250635664016526,0.8602007100633116"/>
                    <discreteMappingEntry attributeValue="3431726" value="0.9913803522439459,-0.13101525554174856,0.30067876558247014|0.9945867796314847,-0.1039092766901615,0.5115914854282425|0.9980650128098623,-0.06217901740016063,0.7546791595356404"/>
                    <discreteMappingEntry attributeValue="3431727" value="0.9999999999999998,2.1073424255447017E-8,0.25|0.9999999999999998,2.1073424255447017E-8,0.5|0.9999999999999999,1.4901161193847656E-8,0.75"/>
                    <discreteMappingEntry attributeValue="3431720" value="0.9857271972077857,0.1683505054488498,0.17076063719901402|0.9999732181069612,0.007318679444263623,0.35057036872111774|0.9997710227919494,-0.021398644479017476,0.621388366425145"/>
                    <discreteMappingEntry attributeValue="3431721" value="1.0,0.0,0.25|1.0,0.0,0.5|1.0,0.0,0.75"/>
                    <discreteMappingEntry attributeValue="3431722" value="0.8476972523952535,0.5304803184676486,0.39441165861898386|0.8443935042957651,0.5357234453550803,0.6661975908408553|0.9458731873048728,0.3245364594891012,0.8871637218102892"/>
                    <discreteMappingEntry attributeValue="3431723" value="0.9988057592939463,-0.04885749892537839,0.32521730647283514|0.9999947268502137,0.0032475023889790974,0.5614490479166303|0.9869985638548817,0.16072907312742452,0.7605530797244028"/>
                    <discreteMappingEntry attributeValue="3431700" value="0.9214767862657709,-0.38843343364508004,0.27420104467991835|0.9292885638789671,-0.36935452487246845,0.5458606689133009|0.9977557726654429,-0.06695833116786147,0.6846035226297268"/>
                    <discreteMappingEntry attributeValue="3431701" value="0.6972465783702134,0.7168313671645723,0.17388905942745572|0.4253427213150974,0.9050323582194547,0.1872645150181396|0.9178049733861792,0.3970315237202141,0.5397619606175564"/>
                    <discreteMappingEntry attributeValue="3431702" value="0.9326631798995789,-0.36074837887314987,0.11231189280998792|0.9444576707234228,0.32863309056101864,0.2683160380321318|0.9997955559497056,-0.020219948150752277,0.5925049355152213"/>
                    <discreteMappingEntry attributeValue="3431703" value="-0.1759467469913156,-0.9843996862165154,0.10899772426533869|0.11531189047944487,-0.9933293350717357,0.3713841314353514|0.9955365552963457,-0.0943767294871257,0.36869975182050196"/>
                    <discreteMappingEntry attributeValue="3431696" value="0.9394909390759412,-0.3425737517589551,0.4778434440087697|0.977937548562291,-0.20889746554704003,0.6289587510077115|0.9946755900324862,-0.10305566744980832,0.7982131540604573"/>
                    <discreteMappingEntry attributeValue="3431697" value="0.9315930766583835,0.363502874159431,0.2654281837280677|0.9282458765683448,0.3719671929537136,0.5256995017919561|0.9706522193833328,0.24048756518001174,0.6460625624159284"/>
                    <discreteMappingEntry attributeValue="3431698" value="0.9649468349394392,0.2624454338340803,0.4084548593967785|0.9620307482296183,0.27294109155779517,0.8283668560236851|0.9973125976874299,0.07326378705711763,0.9613009204701378"/>
                    <discreteMappingEntry attributeValue="3431699" value="0.9398864311868449,-0.3414871834649966,0.5396839511578438|0.9927099403002946,-0.12052789896528343,0.9510626506775756|0.9970497907250544,-0.07675750657183461,0.9031522445482988"/>
                    <discreteMappingEntry attributeValue="3431708" value="1.0,0.0,0.25|1.0,0.0,0.5|1.0,0.0,0.75"/>
                    <discreteMappingEntry attributeValue="3431709" value="0.3115937769943134,0.9502154061782087,0.3200260984723347|0.6854454858935087,0.7281239495224777,0.4935584875317041|0.9289761200770689,0.37013966056956843,0.6542646717668222"/>
                    <discreteMappingEntry attributeValue="3431710" value="1.0,0.0,0.25|1.0,0.0,0.5|1.0,0.0,0.75"/>
                    <discreteMappingEntry attributeValue="3431711" value="0.8534190314468102,0.5212254375645805,0.3683610996156623|0.9602907595595143,0.2790011776043448,0.584000485561501|0.9757074236544094,0.2190776652825997,0.8143722140793663"/>
                    <discreteMappingEntry attributeValue="3431704" value="0.9999999999999999,1.4901161193847656E-8,0.25|0.9999999999999999,1.4901161193847656E-8,0.5|1.0,0.0,0.7499999999999999"/>
                    <discreteMappingEntry attributeValue="3431705" value="0.8396461771591719,-0.5431337746651266,0.07168286804882833|0.9711328499399458,-0.23853927929697197,0.2662892665146045|0.9966459400435828,-0.08183440715642318,0.47887691269652904"/>
                    <discreteMappingEntry attributeValue="3431706" value="0.9999999999999999,1.4901161193847656E-8,0.25|0.9999999999999999,1.4901161193847656E-8,0.5|1.0,0.0,0.75"/>
                    <discreteMappingEntry attributeValue="3431707" value="0.7188051133421376,-0.6952116289542319,0.22793975042963305|0.9998294184051081,0.018469815692185913,0.5189628413611883|0.9908460582503895,0.13499662532695292,0.9512348878471516"/>
                    <discreteMappingEntry attributeValue="3431684" value="0.9141564344654018,-0.4053615834357068,0.39206599389993907|0.9217904159156691,-0.3876885723438566,0.5585083675317063|0.9897600092002491,-0.14274145924685944,0.7479018691943248"/>
                    <discreteMappingEntry attributeValue="3431685" value="0.7522406497027031,-0.658888461679862,0.1673691347483511|0.8314120985276655,-0.5556562988231335,0.2991495783147495|0.9903210068000422,-0.13879590588540702,0.6706132320006689"/>
                    <discreteMappingEntry attributeValue="3431686" value="1.0,0.0,0.25|1.0,0.0,0.5|1.0,0.0,0.75"/>
                    <discreteMappingEntry attributeValue="3431687" value="0.9418526677765038,0.3360261183335051,0.22840943202874203|0.9499521234054354,0.3123955237155365,0.417114386638966|0.9470954607980048,0.3209520028537211,0.5718261210166189"/>
                    <discreteMappingEntry attributeValue="3431680" value="0.6013135921253643,0.7990131187441737,0.3937991253694929|0.8064731205477276,0.5912707550978743,0.6242728517050121|0.9534017427265433,0.3017036906734654,0.797980411296092"/>
                    <discreteMappingEntry attributeValue="3431681" value="0.9842886655885037,0.17656676582528982,0.28236190750861023|0.9999943841856331,0.0033513575154496987,0.5008958312043453|0.9981915530962356,-0.06011342052591073,0.732964125199351"/>
                    <discreteMappingEntry attributeValue="3431682" value="0.9734630142827896,-0.22884440090040525,0.3147956652293512|0.9128692075632576,-0.4082521400835886,0.5484107916706755|0.9711411144185013,-0.23850563072177444,0.6615781851413237"/>
                    <discreteMappingEntry attributeValue="3431683" value="0.9984408801062947,0.05581943149627736,0.4427267623084541|0.9917706526877377,-0.1280272333034609,0.7748049563678684|0.9999637610790688,0.008513314783501346,0.8871145276520486"/>
                    <discreteMappingEntry attributeValue="3431692" value="0.9991491733913431,-0.041242324272472194,0.2521945050764384|0.9997844757818972,-0.02076058731146526,0.5022555318746829|0.9999935232395121,0.003599094195409362,0.7372119390244414"/>
                    <discreteMappingEntry attributeValue="3431693" value="0.6940857997841952,-0.7198922853718702,0.3341461733172012|0.8185828722782085,-0.5743884410507912,0.5981808787991356|0.9276935651288795,-0.3733425360422644,0.8268053075095494"/>
                    <discreteMappingEntry attributeValue="3431694" value="0.9703789628784846,0.241587806817473,0.43543239968899994|0.9836545624082096,0.18006582644553548,0.6704027663842628|0.9941533382658541,0.10797749772456462,0.8369730060692137"/>
                    <discreteMappingEntry attributeValue="3431695" value="0.6858264082867983,0.7277651665863308,0.3647552044815315|0.6751369628539318,0.7376924029623517,0.7092295812232473|0.9374547802394527,0.34810707405365865,0.7041311812808841"/>
                    <discreteMappingEntry attributeValue="3431688" value="0.9186094345460591,0.39516668225315943,0.4184680918986581|0.9128768103071152,0.4082351395991129,0.5506380129518034|0.9933612848220829,0.11503633259375395,0.7212316942269302"/>
                    <discreteMappingEntry attributeValue="3431689" value="0.6993627136436865,-0.7147669513659252,0.15599294957035115|0.8097931990846856,-0.5867154120322652,0.28514541871110616|0.9912187720969915,-0.132232166444222,0.674929022301042"/>
                    <discreteMappingEntry attributeValue="3431690" value="0.9999583552614351,0.009126211856275714,0.3721057854039041|0.9998986414348805,0.014237515818438346,0.5027432271210517|0.9999396231635167,0.01098863174395323,0.6460229929409914"/>
                    <discreteMappingEntry attributeValue="3431691" value="0.9987325588088272,0.050331659769697536,0.5640604252723632|0.9969708147213622,0.0777765684112081,0.762877343659987|0.9967963295657153,0.07998173144111043,0.9206659843725681"/>
                    <discreteMappingEntry attributeValue="3431796" value="0.8906193239800478,-0.454749623148082,0.24161625099052314|0.9394593308070203,-0.3426604233926434,0.4785633268294928|0.9787518545855007,-0.20504830441981914,0.7247186230715582"/>
                    <discreteMappingEntry attributeValue="3431797" value="0.9899036112470744,-0.14174216182915034,0.43961574286442756|0.9972753701270718,-0.07376880192813194,0.7910879544329039|0.9965868549476855,-0.0825508361282964,0.7861934543202119"/>
                    <discreteMappingEntry attributeValue="3431798" value="1.0,0.0,0.25|1.0,0.0,0.5|1.0,0.0,0.75"/>
                    <discreteMappingEntry attributeValue="3431799" value="0.8997095338089648,0.43648912331609735,0.48573038447349826|0.8887334182372679,0.4584243790510071,0.7232794904109526|0.9432741708520884,0.3320148168430215,0.9191365738288169"/>
                    <discreteMappingEntry attributeValue="3431792" value="0.9061938848566714,-0.4228624398647553,0.27005937235430566|0.8897476851032974,-0.4564526885158237,0.49396249291591654|0.9700871340557791,-0.2427569820611653,0.6275801978265171"/>
                    <discreteMappingEntry attributeValue="3431793" value="0.4737519733915605,-0.8806583149596683,0.4059882291205778|0.7378675484950177,-0.6749455391940543,0.7223640174334055|0.8949674942697954,-0.446131353079386,0.7607109824330784"/>
                    <discreteMappingEntry attributeValue="3431794" value="0.9939502955326082,0.10983082450132518,0.4170679699819761|0.9888058059305054,0.14920817054747282,0.5673863070507276|0.9844859751200915,0.17546328616506238,0.8241870699588911"/>
                    <discreteMappingEntry attributeValue="3431795" value="0.8458419165212299,-0.5334336437230903,0.4003472491027372|0.9739727243757919,-0.22666524253179576,0.7118900894269715|0.9970055999152068,-0.0773293846976598,0.7187584386796464"/>
                    <discreteMappingEntry attributeValue="3431804" value="0.974492189035764,-0.2244214194507398,0.20175055088253593|0.9621435718099149,-0.2725431107638919,0.46658413798338044|0.9885659996334278,-0.15078880717334942,0.7489609219005808"/>
                    <discreteMappingEntry attributeValue="3431805" value="0.9662094623452717,0.2577581713049287,0.193914009781214|0.986028092929139,0.1665791101985039,0.4920631492069403|0.9947226611757195,0.10260032818414733,0.8031902224186658"/>
                    <discreteMappingEntry attributeValue="3431806" value="0.9258268886185804,0.37794784337371035,0.19761027186533395|0.9471096207125951,0.32091021540867826,0.45712646784823535|0.984419865490534,0.1758338091141719,0.6723653308290022"/>
                    <discreteMappingEntry attributeValue="3431807" value="0.9999813618761926,0.006105399269105092,0.2707546459497704|0.9996719390096813,-0.02561277721419506,0.47794246144727937|0.9999794082596548,0.006417402642082398,0.6832736053319782"/>
                    <discreteMappingEntry attributeValue="3431800" value="0.9540022989156275,-0.29979928896463004,0.3640234017128309|0.9995029265710994,-0.0315261760416241,0.4949200512933569|0.9995999994506265,0.028281462096353967,0.7256216724009755"/>
                    <discreteMappingEntry attributeValue="3431801" value="0.9501654597092913,0.31174604917373216,0.26055713678425074|0.9650807894771448,0.2619524189278864,0.47093293717077683|0.9924342603633981,0.12277719192486423,0.7213491434380083"/>
                    <discreteMappingEntry attributeValue="3431802" value="0.9865059050449178,0.16372568311510483,0.2623939236143013|0.9947233173952037,0.1025939658570661,0.5053476907988851|0.9986993719978295,0.050985923264572575,0.7492140297853184"/>
                    <discreteMappingEntry attributeValue="3431803" value="0.9624145556160772,-0.2715846518828127,0.19735337169748854|0.9661998677849774,-0.2577941339369309,0.36880257869981425|0.9927235284072197,-0.12041592978804806,0.6322705099354369"/>
                    <discreteMappingEntry attributeValue="3431780" value="1.0,0.0,0.25|1.0,0.0,0.5|1.0,0.0,0.7500000000000001"/>
                    <discreteMappingEntry attributeValue="3431781" value="0.6561298599637165,0.7546480019611751,0.45525653385097503|0.8413835438947221,0.5404384627903146,0.5132256990975143|0.9760036481654321,0.21775417049454532,0.5400715640355451"/>
                    <discreteMappingEntry attributeValue="3431782" value="0.9557703518347925,-0.2941139822476941,0.332778140793258|0.9999988877681295,0.0014914632090418584,0.3910552536116643|0.9997223988510463,-0.023561095804514216,0.6698631244982117"/>
                    <discreteMappingEntry attributeValue="3431783" value="0.7672688752303106,-0.6413255593712245,0.3404325066634905|0.9299387104428609,-0.3677145561707734,0.3916962424838166|0.9844384703897042,-0.17572961621986044,0.5778486599751259"/>
                    <discreteMappingEntry attributeValue="3431776" value="0.9827727365656818,-0.18481814917156023,0.2818274842676067|0.9991730413710304,0.04065997291397595,0.6174974500396709|0.9990412059164525,-0.0437797770780109,0.7214795377148169"/>
                    <discreteMappingEntry attributeValue="3431777" value="0.9345398816379002,0.35585841233307863,0.45099061134549584|0.987144464956591,-0.15983055185278447,0.744087764742961|0.9794845102370758,-0.20151946359008524,0.7008252879403511"/>
                    <discreteMappingEntry attributeValue="3431778" value="0.8370221010122032,-0.5471690802824271,0.25213769393519664|0.9520011151497002,-0.3060945552500522,0.6088227901640694|0.9505081416581864,-0.3106996502114237,0.8373812987464362"/>
                    <discreteMappingEntry attributeValue="3431779" value="0.6636542376286148,-0.7480394728071388,0.3577278950293318|0.7472575692663872,-0.6645345176693913,0.6049266245792323|0.9515922745273476,-0.3073632103226882,0.8794140663539686"/>
                    <discreteMappingEntry attributeValue="3431788" value="-0.5712778164391841,0.820756758390985,0.19427193343394325|0.9941855494458742,0.1076805148251306,0.3639187633084431|0.9951302157275945,0.09856903035919135,0.8600756427713376"/>
                    <discreteMappingEntry attributeValue="3431789" value="0.9541238371657239,-0.29941226319600733,0.40314469633757255|0.9971422146482084,0.0755473610820807,0.37390375050030245|0.966839519119888,-0.2553846985784853,0.6510385479270118"/>
                    <discreteMappingEntry attributeValue="3431790" value="0.9774797795987064,-0.21102909864676114,0.3361157346409281|0.9803487329355155,-0.1972723037624119,0.30564823772737376|0.9436264304376148,-0.33101232572151335,0.6132375804190373"/>
                    <discreteMappingEntry attributeValue="3431791" value="0.6953396547878123,-0.718681267655952,0.38272518180708603|0.730766497167454,-0.6826275167451202,0.39805638586947534|0.9537961824011891,-0.30045439327278534,0.6927302501765445"/>
                    <discreteMappingEntry attributeValue="3431784" value="1.0,0.0,0.25|1.0,0.0,0.5|1.0,0.0,0.7500000000000001"/>
                    <discreteMappingEntry attributeValue="3431785" value="0.4817478719934972,0.8763098697548357,0.43796972071629336|0.6232978737440991,0.7819845014999244,0.5714506700509357|0.9409264514838664,0.33861100528184124,0.6931347608245819"/>
                    <discreteMappingEntry attributeValue="3431786" value="0.7469903255003197,0.6648349070325101,0.3467433203999463|0.8560415246845983,0.5169070593594832,0.45750235934133116|0.964901993704347,0.2626102483631898,0.6096045086413117"/>
                    <discreteMappingEntry attributeValue="3431787" value="0.9815109398904782,0.1914060471231514,0.2903570204487341|0.841615332454663,0.5400774316495988,0.2755945977347447|0.9721410656487349,0.23439656243072776,0.4820866850111985"/>
                    <discreteMappingEntry attributeValue="3431764" value="0.5101413210770334,-0.8600905955361791,0.29980305653852557|0.9407810912910152,-0.33901465789739327,0.6189848757204612|0.976280690455813,-0.21650869138009454,0.8796526159132051"/>
                    <discreteMappingEntry attributeValue="3431765" value="0.5652339869307248,-0.8249306273974784,0.310794156581241|0.8708119360403098,-0.4916162853788789,0.5961149494446657|0.9548089647517605,-0.2972201891353806,0.6832672046351081"/>
                    <discreteMappingEntry attributeValue="3431766" value="0.9512075310488377,0.3085518317495044,0.3623051934973221|0.9278550527564665,0.3729410155430678,0.6568515452626107|0.9637879278036791,0.266669889976147,0.9009948472654661"/>
                    <discreteMappingEntry attributeValue="3431767" value="0.7767350976273549,-0.629827427247991,0.28625020281793984|0.9219609395138615,-0.38728287595853994,0.6073832547964656|0.9807503483546497,-0.19526585518782663,0.894660974834853"/>
                    <discreteMappingEntry attributeValue="3431760" value="1.0,0.0,0.25|1.0,0.0,0.5|0.9999999999999998,2.1073424255447017E-8,0.75"/>
                    <discreteMappingEntry attributeValue="3431761" value="0.9915808075650286,-0.1294893897919271,0.35175599045127054|0.9975150658146478,-0.07045348446172782,0.6289500517347016|0.995764083533212,-0.0919450376326118,0.8672064452473673"/>
                    <discreteMappingEntry attributeValue="3431762" value="0.8717936935122387,-0.48987320395413436,0.31092820957211476|0.9973860232823974,-0.07225732184993389,0.5923355678765697|0.9911476759296141,-0.13276401808970964,0.801353557421875"/>
                    <discreteMappingEntry attributeValue="3431763" value="0.9663229893094976,-0.2573322372575124,0.3384465274164862|0.984121484951431,-0.17749620519039355,0.5509354527674878|0.9791521730337538,-0.20312809269837068,0.7301357926507439"/>
                    <discreteMappingEntry attributeValue="3431772" value="0.9672190988556549,-0.2539433299160559,0.2930439431896454|0.9709380605726667,-0.23933090592605988,0.663526322594821|0.9984742648480244,-0.055219040522244495,0.8491598311221884"/>
                    <discreteMappingEntry attributeValue="3431773" value="0.9387472945787021,-0.3446063216500352,0.20401873672188028|0.9845364404116586,-0.17517990039254136,0.44127038581653644|0.992402705845272,-0.12303198539803584,0.6449644275938701"/>
                    <discreteMappingEntry attributeValue="3431774" value="0.9919124737065866,0.1269237743895133,0.24244446149892926|0.9878798542904119,0.1552204673590262,0.43086817722139514|0.977162121745474,0.21249514777021009,0.6642081744481673"/>
                    <discreteMappingEntry attributeValue="3431775" value="0.9645120930221952,0.2640386759812741,0.40467512717096854|0.9974291053292097,0.0716601691469697,0.6370105038870298|0.9978937771866588,-0.06486917181637891,0.7700057955715232"/>
                    <discreteMappingEntry attributeValue="3431768" value="0.9638790639713676,-0.26634028992565184,0.2780849699709672|0.9991049006467093,-0.04230127071057213,0.4584575853196366|0.9999596084527924,0.008987850852016028,0.6392954702216048"/>
                    <discreteMappingEntry attributeValue="3431769" value="0.9290118215266678,0.3700500445395226,0.335436867768119|0.9609515694432238,0.2767166080751299,0.5331701119821021|0.9943612768447918,0.10604551433981214,0.7335287653174898"/>
                    <discreteMappingEntry attributeValue="3431770" value="1.0,0.0,0.25|1.0,0.0,0.5|1.0,0.0,0.75"/>
                    <discreteMappingEntry attributeValue="3431771" value="0.9992226157503459,0.03942288894838423,0.24240024534228263|0.9980928139353946,0.06173114911068592,0.5578995504196348|0.9994044620070097,0.03450683005550446,0.8485394498739541"/>
                    <discreteMappingEntry attributeValue="3431748" value="0.9340362619909833,0.35717819262366945,0.23364803378736487|0.9324860248624336,0.36120605398616573,0.46728760204542963|0.9868430887195782,0.16168091491082923,0.6906027797921396"/>
                    <discreteMappingEntry attributeValue="3431749" value="0.9418786172726226,-0.3359533752243198,0.2251198094774673|0.941698628913887,-0.3364575638943273,0.45027592371237907|0.9843659488740365,-0.17613539876276363,0.7068720331671702"/>
                    <discreteMappingEntry attributeValue="3431750" value="0.9999285555862916,0.011953397973489162,0.26049220033224485|0.9998757454182322,0.015763683717154805,0.5209312968807034|0.9998921067630033,0.014689276123851392,0.786013628426498"/>
                    <discreteMappingEntry attributeValue="3431751" value="0.9677406946200225,0.25194830417440056,0.2531133164634444|0.9852505995750642,0.1711176672263167,0.48714394785961107|0.995596556711438,0.09374164637090841,0.7259802338960297"/>
                    <discreteMappingEntry attributeValue="3431744" value="0.9819817312915685,-0.18897586991363138,0.29490396206836816|0.9783034518118995,-0.2071771130528719,0.5479590603209967|0.9862132283703372,-0.16547950987163673,0.79246404141452"/>
                    <discreteMappingEntry attributeValue="3431745" value="0.9996553036186352,0.026254027255533326,0.28016157486905613|0.999931103239029,0.011738346356208547,0.5269875587316646|0.998527162948726,0.05425407683822824,0.7675298019685038"/>
                    <discreteMappingEntry attributeValue="3431746" value="0.9884034576119113,-0.15185060085761495,0.17725196404397173|0.9989986001750453,-0.04474144441454746,0.36856506165651665|0.9996901328465629,0.024892534809081636,0.628422087372133"/>
                    <discreteMappingEntry attributeValue="3431747" value="0.9955937429316736,-0.09377152571703562,0.2733871370453326|0.9998382566152634,-0.01798501066306998,0.531264539248688|0.9998303931388124,-0.018416974667079773,0.7277228037723698"/>
                    <discreteMappingEntry attributeValue="3431756" value="0.9945696959100081,-0.10407266681254025,0.22276430813142328|0.99761506594613,-0.06902304106092856,0.5247501864019958|0.9993230887055113,-0.03678810106646862,0.8207391915415455"/>
                    <discreteMappingEntry attributeValue="3431757" value="0.9928022806695036,0.11976490094110293,0.28714749279992496|0.9952421981726456,0.09743185811879218,0.5897289050468775|0.9980171682428546,0.0629422901753161,0.8611333129095948"/>
                    <discreteMappingEntry attributeValue="3431758" value="0.8453698611741347,0.5341814278112113,0.14985964183895087|0.9534911579556018,0.3014209874917233,0.34919034429414|0.9948764190758987,0.10109852010151632,0.6554197107875835"/>
                    <discreteMappingEntry attributeValue="3431759" value="0.9816765007724261,-0.19055510444804397,0.32701030706706913|0.9320619655109053,-0.36229889931926107,0.5357875175723636|0.9962137141186133,-0.0869381147828609,0.715962171143438"/>
                    <discreteMappingEntry attributeValue="3431752" value="0.9574495721313429,0.2886006182001496,0.38523297900294384|0.9466837187450098,0.3221644559275887,0.5548810740132447|0.997039577391073,0.07689005862808683,0.7627693245662961"/>
                    <discreteMappingEntry attributeValue="3431753" value="0.961299969500684,-0.27550384505117903,0.2237471047740107|0.9807601294812958,-0.1952167216706396,0.4437818719767836|0.9934695905628249,-0.11409720691994626,0.679937498486652"/>
                    <discreteMappingEntry attributeValue="3431754" value="0.9585544940035491,0.28490925226394453,0.22980053721665494|0.942300408924178,0.3347684861831038,0.500821577296303|0.9777258119141468,0.20988624708832765,0.650666907912265"/>
                    <discreteMappingEntry attributeValue="3431755" value="0.9297848266750666,-0.36810348556461187,0.23054442463553487|0.9579418115045236,-0.28696251631777925,0.5022172376664538|0.9805265675466183,-0.1963864820583307,0.7263154132611134"/>
                    <discreteMappingEntry attributeValue="3431860" value="1.0,0.0,0.25|1.0,0.0,0.5|1.0,0.0,0.75"/>
                    <discreteMappingEntry attributeValue="3431861" value="0.9645627184895623,-0.2638536755476894,0.19568254212444472|0.9710036329331173,-0.23906472937405046,0.4463212956091478|0.9965780994631801,-0.08265646780715899,0.6832249262598452"/>
                    <discreteMappingEntry attributeValue="3431862" value="1.0,0.0,0.25|1.0,0.0,0.5|1.0,0.0,0.75"/>
                    <discreteMappingEntry attributeValue="3431863" value="0.6117576824795732,0.7910452186362179,0.29277176650462644|0.9348116575220797,0.35514386516005303,0.5448840924707369|0.9830205724164701,0.18349537924971143,0.7540979572286818"/>
                    <discreteMappingEntry attributeValue="3431856" value="0.9999136742256016,0.013139410057435168,0.45762851383573927|0.9883514057885134,0.15218902284944616,0.8005690545803946|0.9997833581403865,0.020814340862289397,0.9473054177039487"/>
                    <discreteMappingEntry attributeValue="3431857" value="0.7465498963131368,-0.6653294314208898,0.2820083463510175|0.8764451159933567,-0.4815017742972413,0.4971234093759242|0.9735950893975843,-0.2282818475063442,0.8219343232220525"/>
                    <discreteMappingEntry attributeValue="3431858" value="0.9894784697984299,0.14468019147539735,0.25629256739149686|0.9390869167643525,0.34367973865507706,0.43221511720230466|0.9997981607343996,0.02009073896380058,0.7616850654487205"/>
                    <discreteMappingEntry attributeValue="3431859" value="0.9048688723060698,-0.4256904085500888,0.31181595731007905|0.9356057036108811,-0.35304669290447693,0.4946462858261857|0.9698225151555753,-0.24381199539258516,0.6806427039697756"/>
                    <discreteMappingEntry attributeValue="3431868" value="0.8926277641190754,-0.45079449278333056,0.24013678515109566|0.9414185100948989,-0.33724055042462026,0.44416748648971693|0.9777356089123188,-0.2098406039470368,0.6578241317096456"/>
                    <discreteMappingEntry attributeValue="3431869" value="0.9999999999999998,2.1073424255447017E-8,0.25|0.9999999999999998,2.1073424255447017E-8,0.5|1.0,0.0,0.75"/>
                    <discreteMappingEntry attributeValue="3431870" value="0.9911191695299274,-0.13297665881765502,0.2866972332326387|0.990900076702199,-0.13459954677329364,0.5508551243075558|0.9950602646629773,-0.09927270364428308,0.8036218594898054"/>
                    <discreteMappingEntry attributeValue="3431871" value="0.5529899089043875,-0.8331879503748942,0.3966835488541131|0.8066357532543676,-0.5910488656378243,0.6205725894061487|0.9307377452831623,-0.36568736579927835,0.7824169929920435"/>
                    <discreteMappingEntry attributeValue="3431864" value="0.9999201521363275,0.012636825220907158,0.2178571571673194|0.9997834572673719,0.02080957891215142,0.4902818866200735|0.9994921797474666,0.03186506902013344,0.759657322937953"/>
                    <discreteMappingEntry attributeValue="3431865" value="0.9643235041986985,0.26472661228131694,0.18985836599900308|0.9705939581286819,0.24072259645512828,0.4328677346419895|0.9972481356491032,0.07413606372331803,0.7158731686696694"/>
                    <discreteMappingEntry attributeValue="3431866" value="0.9022233876289751,0.43126900980165045,0.25820341586406803|0.9647709642881181,0.26309121320670265,0.6535436695471568|0.9779859201492771,0.20867088917664534,0.936092354790879"/>
                    <discreteMappingEntry attributeValue="3431867" value="0.9954930102420234,-0.0948349437669189,0.32677091088621013|0.9731225666585149,-0.2302877987648155,0.513609911495429|0.9990125181937092,0.04442959027792055,0.6717388392779439"/>
                    <discreteMappingEntry attributeValue="3431844" value="0.9851381073738712,-0.171764109754707,0.32261926025397436|0.9992980460840948,0.03746218216428911,0.5121860836346965|0.9992261604488181,0.0393329413432671,0.636775722090344"/>
                    <discreteMappingEntry attributeValue="3431845" value="0.9518456641006646,-0.3065776112712158,0.31002683196645275|0.9999995322800888,9.671812672552807E-4,0.6488541140892248|0.9999276331557834,0.012030313855969052,0.9310833833146898"/>
                    <discreteMappingEntry attributeValue="3431846" value="1.0,0.0,0.25|1.0,0.0,0.5|1.0,0.0,0.75"/>
                    <discreteMappingEntry attributeValue="3431847" value="0.9939870831095251,-0.10949739088863274,0.41494097251646744|0.9951677636301716,0.09818921647168276,0.6598107447292985|0.9951641357830726,0.09822597849413471,0.8157597264646429"/>
                    <discreteMappingEntry attributeValue="3431840" value="0.8633901167476575,-0.5045369226354661,0.34702055259968434|0.9203273400818339,-0.3911490599476067,0.6908211133075458|0.9929229352545599,-0.11876045067895746,0.7889257341732043"/>
                    <discreteMappingEntry attributeValue="3431841" value="0.9000320620592064,-0.4358236882793923,0.20840621261762082|0.8827975233680394,-0.46975369368984843,0.36158058637715096|0.9821551729286944,-0.18807236981919082,0.6421315426384877"/>
                    <discreteMappingEntry attributeValue="3431842" value="0.3119525839154226,0.9500976714993523,0.04541125040733017|0.9262734387823587,0.37685211503493515,0.27304255653511983|0.9230874497942478,0.38459011951992733,0.8102678735675387"/>
                    <discreteMappingEntry attributeValue="3431843" value="0.667836897571717,-0.7443076502641793,0.2272174856542962|0.8825666412987276,-0.4701873282710658,0.478039307583359|0.9591497684549969,-0.2828987834415798,0.7689638248222271"/>
                    <discreteMappingEntry attributeValue="3431852" value="0.9690885843951547,0.24671302275112109,0.2676320778672094|0.9967987944686865,0.07995100590845217,0.5214366456823338|0.9957001391774473,0.0926349439575161,0.7508407878265717"/>
                    <discreteMappingEntry attributeValue="3431853" value="0.9930077088214366,-0.11804952444292575,0.33477016185144454|0.9889971177350514,-0.1479347866857586,0.5091885441620471|0.9995596588521237,-0.029673024709760246,0.6989280983747695"/>
                    <discreteMappingEntry attributeValue="3431854" value="0.6392789351300971,0.7689749300848039,0.33140579419886573|0.9548718993302273,0.2970179386324743,0.862602980440317|0.9979086610053101,-0.06463980422765193,0.9837892610898556"/>
                    <discreteMappingEntry attributeValue="3431855" value="0.8450434476780835,0.5346976449698821,0.30070889140037227|0.9056467733738364,0.42403292546400106,0.5422706431231824|0.9447636758445824,0.3277523406546974,0.6782505003867273"/>
                    <discreteMappingEntry attributeValue="3431848" value="0.5360349727497968,-0.8441957758654828,0.3509016716812669|0.8740521095352979,-0.4858321827718864,0.5414790949995121|0.9902145843861638,-0.1395531327808044,0.8661126408333115"/>
                    <discreteMappingEntry attributeValue="3431849" value="0.9301167106108369,0.3672640802508145,0.2374874625301825|0.960649850762675,0.2777622440679265,0.5208038772187074|0.9847027125332535,0.17424284183188923,0.7596827339808448"/>
                    <discreteMappingEntry attributeValue="3431850" value="0.9999454031758356,0.0104494338370858,0.20210451602379143|0.9966599829160517,-0.08166320134415173,0.4296304351135599|0.9984538060740559,-0.05558774267976376,0.7000366977820354"/>
                    <discreteMappingEntry attributeValue="3431851" value="0.9901306068089127,0.14014771300386691,0.2289084108882877|0.9985820504540955,0.053234279471917285,0.49094655487688976|0.9999622333726204,0.008690904926481597,0.7508308538344841"/>
                    <discreteMappingEntry attributeValue="3431828" value="0.994566425436709,0.1041039163242531,0.3899597711896579|0.98561534793157,0.1690041003104072,0.5740466898296099|0.9962438596960975,0.08659198587526651,0.7557381249267433"/>
                    <discreteMappingEntry attributeValue="3431829" value="0.9178554005906565,0.39691493245601817,0.45629989639141283|0.9654249596830405,0.26068112171962043,0.5965537407838876|0.9869698617708956,0.1609052266271645,0.7991065322673017"/>
                    <discreteMappingEntry attributeValue="3431830" value="0.9822286876839713,0.1876880526049102,0.40684365239195297|0.9756428961126018,0.2193648542155623,0.6543526503621537|0.9823092011217728,0.18726620995658708,0.7710281507445315"/>
                    <discreteMappingEntry attributeValue="3431831" value="0.9210941782922721,-0.38933984475787214,0.2919587749150918|0.9354523551617361,-0.35345281328964007,0.4676104089074911|0.9755473467311693,-0.21978938619909696,0.6633635296607135"/>
                    <discreteMappingEntry attributeValue="3431824" value="0.9979334437608501,-0.06425606448896601,0.4695789161594273|0.998421285544382,0.05616882206263151,0.6652095153255099|0.9999913935148711,0.004148842752650543,0.8421513795386467"/>
                    <discreteMappingEntry attributeValue="3431825" value="0.9381398058701302,0.346256703389197,0.1728372124374691|0.9571970270287758,0.28943712866056587,0.4345995677979466|0.972184492646366,0.23421637914101565,0.7992668105952786"/>
                    <discreteMappingEntry attributeValue="3431826" value="0.9832037612772977,-0.18251127036480405,0.32544909849505493|0.9651081839883503,-0.2618514716374697,0.6598471950287212|0.9972729690278558,0.07380125504600447,0.7920787194703929"/>
                    <discreteMappingEntry attributeValue="3431827" value="0.8918235609219004,0.4523833951247342,0.21719003528451009|0.9274261105139042,0.37400642980709775,0.491500175718277|0.9802703830279186,0.1976612662063506,0.7388162101871172"/>
                    <discreteMappingEntry attributeValue="3431836" value="0.9998986138622441,0.01423945210894256,0.27691415911832756|0.9998639341840795,0.016495851537122012,0.54944629507882|0.9996472009479181,0.026560753697750322,0.8215832528585262"/>
                    <discreteMappingEntry attributeValue="3431837" value="0.9986731088339172,0.051497783369761484,0.23942948419786966|0.9986679467345615,0.05159779224903952,0.47876797396431936|0.998782659663106,0.04932746452324727,0.7199088433029507"/>
                    <discreteMappingEntry attributeValue="3431838" value="1.0,0.0,0.25|1.0,0.0,0.5|1.0,0.0,0.7499999999999999"/>
                    <discreteMappingEntry attributeValue="3431839" value="0.7889147123668232,0.6145027067565876,0.5171519665060071|0.8948322714592519,0.4464025156235969,0.7436376877813173|0.9427389675700873,0.33353146631897534,0.8252440103464027"/>
                    <discreteMappingEntry attributeValue="3431832" value="0.9780632735299015,-0.20830802426208414,0.3674588950385785|0.9880587940146649,-0.15407731685840717,0.6071053595208123|0.9987861682484843,-0.04925637131895097,0.9078467907155269"/>
                    <discreteMappingEntry attributeValue="3431833" value="0.9959723165562058,0.0896612773367915,0.3987770404362094|0.997810170421264,0.06614275322276934,0.6241022407369529|0.9991248999572898,0.041826239196652876,0.7791755323720527"/>
                    <discreteMappingEntry attributeValue="3431834" value="0.995494978001866,-0.09481428570138709,0.23500436391334234|0.9962794646795318,-0.0861813683916983,0.47508677640855446|0.9964731191991562,-0.08391258971992421,0.713919473556081"/>
                    <discreteMappingEntry attributeValue="3431835" value="0.9809085831525172,-0.1944694101850502,0.3917771800034505|0.9917819698377763,-0.12793953378334672,0.5798114823732795|0.9995733572342725,0.02920793569229721,0.7593084580956572"/>
                    <discreteMappingEntry attributeValue="3431812" value="0.9736228056444138,0.22816360868705587,0.17946612284772154|0.9873994348658016,0.1582477678411155,0.3817295690360178|0.9991413975571858,0.041430275010837486,0.7114461433065092"/>
                    <discreteMappingEntry attributeValue="3431813" value="0.8132651585439746,0.5818932736322391,0.2618213946869036|0.8883208685937388,0.45922329472802814,0.5421960712805112|0.9748285362641825,0.2229558810281338,0.7028810931420822"/>
                    <discreteMappingEntry attributeValue="3431814" value="0.9972237335981073,0.07446358270088163,0.2410779767945576|0.9978194789197598,-0.06600217790572617,0.49895880217068617|0.9973405995468066,-0.07288160601699345,0.7893873025025205"/>
                    <discreteMappingEntry attributeValue="3431815" value="1.0,0.0,0.25|1.0,0.0,0.5|1.0,0.0,0.75"/>
                    <discreteMappingEntry attributeValue="3431808" value="0.8562511812320627,-0.5165596912639403,0.3262469125908279|0.9072304988746194,-0.4206338335318609,0.5694653200975874|0.9776795270486848,-0.21010174294817277,0.8283493612915787"/>
                    <discreteMappingEntry attributeValue="3431809" value="0.8705080565879252,-0.49215416630921016,0.3807235080179049|0.9341985950261273,-0.3567533952903738,0.6591671736823117|0.971397570935179,-0.23745896315202325,0.8693928337238529"/>
                    <discreteMappingEntry attributeValue="3431810" value="0.938104093808938,0.346353445455522,0.2818357816100852|0.9641692063180348,0.26528803513926297,0.5126846710336548|0.9917261938276678,0.12837116684087232,0.7828030337446231"/>
                    <discreteMappingEntry attributeValue="3431811" value="0.9789867961648362,-0.20392364486471273,0.26822906147482684|0.9581172913743805,-0.2863760743662439,0.4784677899141242|0.9963805098172593,-0.08500517429132394,0.6676368710665265"/>
                    <discreteMappingEntry attributeValue="3431820" value="0.7882549101770153,-0.6153488413752198,0.4458230587055618|0.855657285820237,-0.5175428573777684,0.6211716152686211|0.9466109928279909,-0.32237808278046043,0.8705077146619983"/>
                    <discreteMappingEntry attributeValue="3431821" value="0.9581687310817034,-0.2862039181724777,0.2252250854140853|0.9455850072541306,-0.32537515894149893,0.5912544284459016|0.9959600097092626,-0.08979787892776533,0.8449584563128786"/>
                    <discreteMappingEntry attributeValue="3431822" value="0.838935002335912,0.5442316251888007,0.2256322352812986|0.8980458730872438,0.4399018183992537,0.4692648776948681|0.956190242137452,0.29274600055529537,0.702485335745216"/>
                    <discreteMappingEntry attributeValue="3431823" value="0.9808100954798881,0.19496552670852574,0.2611893913303432|0.9959817854051068,0.08955603352792986,0.5350893837320787|0.9980689578577709,-0.06211566115484119,0.8072100385803611"/>
                    <discreteMappingEntry attributeValue="3431816" value="1.0,0.0,0.25|1.0,0.0,0.5|1.0,0.0,0.75"/>
                    <discreteMappingEntry attributeValue="3431817" value="0.9708193110979908,0.23981214564575865,0.33856569769683903|0.913908352747823,0.4059205867873182,0.5973692965041298|0.9992103704024752,0.03973204852695561,0.7810499449820645"/>
                    <discreteMappingEntry attributeValue="3431818" value="0.9986646219286355,-0.051662103210531087,0.35626963812425405|0.9999913348968618,0.004162947416490577,0.6246602775600415|0.9878987010242037,0.1551004723225913,0.8583056849364008"/>
                    <discreteMappingEntry attributeValue="3431819" value="0.991670964824488,0.1287971176854088,0.26747797978841503|0.9937454746957668,0.11166884758823796,0.6683778361081226|0.9976716333434849,0.06820052801660058,0.8268735925089121"/>
                    <discreteMappingEntry attributeValue="3431924" value="0.9880329622104274,0.15424287855744986,0.20381285995117354|0.9639630947838175,0.26603599736653105,0.47215925401131403|0.9853199066631521,0.17071813475233766,0.7745704870906758"/>
                    <discreteMappingEntry attributeValue="3431925" value="1.0,0.0,0.25|1.0,0.0,0.5|1.0,0.0,0.7500000000000001"/>
                    <discreteMappingEntry attributeValue="3431926" value="0.8140340209698482,0.5808171938774375,0.22051392032754955|0.982759980200462,0.18488596841401356,0.5057449527981794|0.9965811594646176,0.0826195654803298,0.7266897254798939"/>
                    <discreteMappingEntry attributeValue="3431927" value="0.973112687624357,-0.23032954040787001,0.23696493443235445|0.976504163780382,-0.21549853391514515,0.4736017804227082|0.9958017668099184,-0.0915360104999389,0.7516710498942821"/>
                    <discreteMappingEntry attributeValue="3431920" value="0.9741824049090745,0.22576235728210328,0.2856205297896786|0.9974877206010905,-0.07083958815550002,0.4926520318170696|0.9972730721704012,-0.07379986127229378,0.7088125645674479"/>
                    <discreteMappingEntry attributeValue="3431921" value="0.9615320651388776,0.27469271506497095,0.3186496720365956|0.9368434293302392,0.349749037054796,0.6135660955215065|0.9898070151953803,0.14241514199695282,0.7584712283216865"/>
                    <discreteMappingEntry attributeValue="3431922" value="1.0,0.0,0.25|1.0,0.0,0.5|1.0,0.0,0.75"/>
                    <discreteMappingEntry attributeValue="3431923" value="0.798173534768733,-0.6024275959771317,0.22394974656729802|0.8833054436771053,-0.4687979235986356,0.5092279741011915|0.9882251934636386,-0.15300642798181427,0.6863806262003747"/>
                    <discreteMappingEntry attributeValue="3431932" value="0.9873801349694659,0.1583681441063176,0.505344679823612|0.9809825276032494,0.194096060076293,0.7467065790121715|0.9683071742898484,0.2497623194535341,0.8806681203896259"/>
                    <discreteMappingEntry attributeValue="3431933" value="0.9126244800460154,0.40879892174605853,0.33645455053596607|0.9648274395814793,0.26288402734028343,0.6228501245490727|0.9955415951954126,0.09432355080134106,0.7415083537529593"/>
                    <discreteMappingEntry attributeValue="3431934" value="0.9999999999999998,2.1073424255447017E-8,0.25|0.9999999999999998,2.1073424255447017E-8,0.5|1.0,0.0,0.7499999999999999"/>
                    <discreteMappingEntry attributeValue="3431935" value="0.954909444112739,-0.2968972104016805,0.2293272297299481|0.9800489996742494,-0.19875602692120578,0.5709500561023289|0.9993596013800855,-0.03578249752933132,0.714595532658917"/>
                    <discreteMappingEntry attributeValue="3431928" value="0.7932878950830586,0.6088467093732954,0.40903678463973725|0.9322762263692587,0.361747201435885,0.6770315398941881|0.9765334956199077,0.21536557740819168,0.8033542756447116"/>
                    <discreteMappingEntry attributeValue="3431929" value="0.9708796392156216,-0.23956779031527684,0.42095746029839315|0.977850536277871,-0.2093043924552949,0.627063158794435|0.9903283177190141,-0.13874373183617159,0.739423397649861"/>
                    <discreteMappingEntry attributeValue="3431930" value="0.6373965031886307,-0.77053598081005,0.2556663303838651|0.9437254858902222,-0.33072981008863417,0.40451444746468324|0.9949853091869516,-0.10002117026982996,0.694922633127201"/>
                    <discreteMappingEntry attributeValue="3431931" value="0.8653216478874954,-0.5012169646942024,0.5154956999269111|0.8785148037011226,-0.4777151239786931,0.7668408450882903|0.9102605090265654,-0.41403599566547117,0.9097331797539946"/>
                    <discreteMappingEntry attributeValue="3431908" value="0.9570232944860191,0.2900110580842158,0.27781443040185366|0.985402976921356,0.1702379895162342,0.47037836346278933|0.9741545102563628,0.22588269111905399,0.6427428022063015"/>
                    <discreteMappingEntry attributeValue="3431909" value="1.0,0.0,0.25|1.0,0.0,0.5|1.0,0.0,0.75"/>
                    <discreteMappingEntry attributeValue="3431910" value="0.998942489389303,-0.045977199704879027,0.33934459073124695|0.9967452707175666,0.08061554007860341,0.722005286428006|0.9985332834229227,0.054141314138439096,0.836911307357137"/>
                    <discreteMappingEntry attributeValue="3431911" value="0.9846794159856426,-0.1743744469071483,0.17669472158063249|0.9976177471130868,-0.06898427824518541,0.5303724239909007|0.999507116844107,-0.03139304665018477,0.8281908755669518"/>
                    <discreteMappingEntry attributeValue="3431904" value="0.9561237064999347,-0.2929632363775815,0.22817962169706013|0.9801009239609041,-0.19849982078324932,0.44746937075012533|0.9985118556360794,-0.05453507269815831,0.6977340016226096"/>
                    <discreteMappingEntry attributeValue="3431905" value="0.5675595080330418,-0.8233323781081925,0.3351829660896858|0.7173499699713924,-0.6967130116353809,0.5649054829872044|0.9562369022932252,-0.2925935520353394,0.7183378022058579"/>
                    <discreteMappingEntry attributeValue="3431906" value="0.988575937245722,-0.15072364213600428,0.26766321061466847|0.9985696711013199,-0.05346598878354185,0.4822850468512361|0.9989222006596629,-0.0464159135346515,0.7040919006684087"/>
                    <discreteMappingEntry attributeValue="3431907" value="0.9934229328090834,0.11450273607647668,0.378494595644302|0.9993225753297169,-0.03680204391582442,0.6129527151501932|0.9992536051533479,-0.03862942645234358,0.8783573226049332"/>
                    <discreteMappingEntry attributeValue="3431916" value="0.9999795438559588,0.006396238709477767,0.32089806883053634|0.9965219822796026,-0.08333029961263375,0.5138285079169015|0.999556963332011,-0.02976368684300916,0.7387973698113092"/>
                    <discreteMappingEntry attributeValue="3431917" value="0.873273287663904,0.48723071029305653,0.24605756340287951|0.9379315080593089,0.34682053888083175,0.5228968215581964|0.9927347363476359,0.12032349416797158,0.7600189051111584"/>
                    <discreteMappingEntry attributeValue="3431918" value="0.9795862041310479,-0.2010245474466363,0.44589839859341196|0.9953325314204297,-0.09650467292416161,0.5609112597556314|0.9999931566090955,0.00369955875436789,0.7221285029981307"/>
                    <discreteMappingEntry attributeValue="3431919" value="0.9819047508914811,-0.1893754476608265,0.3170448620865406|0.9933419449061783,-0.11520321388750825,0.6128569077542507|0.9934167028335827,-0.11455677427046013,0.8808207530146142"/>
                    <discreteMappingEntry attributeValue="3431912" value="0.9439867627943885,-0.3299833202890274,0.19065620194403207|0.9856304929009946,-0.16891575256246075,0.42554165673743627|0.9936394283214726,-0.11260855422647602,0.7209212425714808"/>
                    <discreteMappingEntry attributeValue="3431913" value="0.8108861863547578,-0.5852038899213137,0.24133834559202022|0.8932503055029933,-0.4495596642480385,0.5185304080930376|0.9746430466232164,-0.22376534957185565,0.729003121400443"/>
                    <discreteMappingEntry attributeValue="3431914" value="1.0,0.0,0.25|1.0,0.0,0.5|0.9999999999999999,1.4901161193847656E-8,0.75"/>
                    <discreteMappingEntry attributeValue="3431915" value="0.9517620031379427,-0.3068372359783779,0.2918942575587903|0.9808439709805227,-0.1947950322548283,0.5927508070668231|0.9944533648397436,-0.10517844436438432,0.8135106855651922"/>
                    <discreteMappingEntry attributeValue="3431892" value="0.9999999999999999,1.4901161193847656E-8,0.25|0.9999999999999999,1.4901161193847656E-8,0.5|1.0,0.0,0.7499999999999999"/>
                    <discreteMappingEntry attributeValue="3431893" value="1.0,0.0,0.25|1.0,0.0,0.5|1.0,0.0,0.75"/>
                    <discreteMappingEntry attributeValue="3431894" value="0.9826165712534692,0.18564663718493746,0.22375554233751171|0.9894699817039102,0.14473823028786692,0.46079282517469433|0.9971891181816579,0.07492571374426486,0.7439650228525427"/>
                    <discreteMappingEntry attributeValue="3431895" value="0.658073715016575,0.7529535082621527,0.16805602652940813|0.9713991232325648,0.23745261292098752,0.28445200467997384|0.998474436766246,0.05521593179805766,0.6149251197759005"/>
                    <discreteMappingEntry attributeValue="3431888" value="0.9999999999999998,2.1073424255447017E-8,0.25|0.9999999999999998,2.1073424255447017E-8,0.5|0.9999999999999999,1.4901161193847656E-8,0.75"/>
                    <discreteMappingEntry attributeValue="3431889" value="0.9808757926736141,-0.19463473314624277,0.25254671295204295|0.9751600086686724,-0.22150159704461464,0.5192524442810894|0.9785718727628453,-0.2059055361990486,0.745731666611477"/>
                    <discreteMappingEntry attributeValue="3431890" value="1.0,0.0,0.25|1.0,0.0,0.5|1.0,0.0,0.75"/>
                    <discreteMappingEntry attributeValue="3431891" value="0.9783628171577579,-0.20689658770297703,0.2474198663420948|0.9784389717714664,-0.20653614337155496,0.4893810170049177|0.992433827031107,-0.12278069459157938,0.7568762854596841"/>
                    <discreteMappingEntry attributeValue="3431900" value="1.0,0.0,0.25|1.0,0.0,0.5|1.0,0.0,0.75"/>
                    <discreteMappingEntry attributeValue="3431901" value="0.8158692796711571,-0.5782363863411462,0.3347473342287069|0.915351899878483,-0.40265481418809795,0.6511058649555637|0.975900442130629,-0.2182162391969096,0.8308161231585085"/>
                    <discreteMappingEntry attributeValue="3431902" value="0.9808900851786925,-0.1945626911772589,0.23356267011067494|0.9912294974440231,-0.1321517438283331,0.44395829368736994|0.995293257051629,-0.09690888745393803,0.6832376085456168"/>
                    <discreteMappingEntry attributeValue="3431903" value="0.7992107621805901,0.6010508777256051,0.21573483671423865|0.9333596084876331,0.35894267124961926,0.459061455629156|0.9718855762280653,0.2354536615129218,0.7458806039936287"/>
                    <discreteMappingEntry attributeValue="3431896" value="0.8676356588459797,-0.4972005264467272,0.26267029737254133|0.9022740024820604,-0.43116310654438295,0.5522696902875914|0.9775002122357247,-0.2109344331281955,0.8861650795666817"/>
                    <discreteMappingEntry attributeValue="3431897" value="0.9973693958381712,0.07248646939533879,0.23812289131629152|0.998542104164527,0.05397838651422272,0.49763250649349344|0.9991558962551167,0.04107913069472731,0.758692474481982"/>
                    <discreteMappingEntry attributeValue="3431898" value="0.9974522739009819,0.07133695598888827,0.22387969647407685|0.9916991075894448,0.12858024734110135,0.45984032502195493|0.9999712482599,0.007583050411107056,0.6865004133721582"/>
                    <discreteMappingEntry attributeValue="3431899" value="0.9652517704992598,0.2613216782971598,0.255043070573428|0.9999109819657752,0.013342718772392476,0.5368203129574359|0.99993632787574,0.011284511260151802,0.8166274078647138"/>
                    <discreteMappingEntry attributeValue="3431876" value="0.992832736240906,0.11951216611038254,0.27872686491731485|0.9967280600000309,0.08082805458858217,0.5662596650250801|0.998603418154851,0.052831933993067376,0.8313947167649076"/>
                    <discreteMappingEntry attributeValue="3431877" value="0.9933457463708063,0.11517043095788847,0.3091042992286648|0.9847566656941451,-0.1739376594385176,0.5074593958613017|0.9884467856246749,-0.15156830799427679,0.7036863893797703"/>
                    <discreteMappingEntry attributeValue="3431878" value="0.9672156682453549,0.25395639606178777,0.1335274200521959|0.9957636103642304,0.09195016190520305,0.5485065803013599|0.9984236034068368,0.056127606042904635,0.887342942660307"/>
                    <discreteMappingEntry attributeValue="3431879" value="0.9331793419026422,-0.35941106806295164,0.3483470903632692|0.9677685180404508,-0.2518414094024047,0.5772315533631919|0.9903269683838745,-0.1387533628118775,0.7802578503440336"/>
                    <discreteMappingEntry attributeValue="3431872" value="0.9230634238545419,0.38464778114780585,0.41003217180971574|0.7904801708163044,0.6124876321577655,0.6504647259404921|0.9156052919372001,0.40207828762144643,0.8642445152760864"/>
                    <discreteMappingEntry attributeValue="3431873" value="0.8733901093606116,-0.48702126942368645,0.3240584597303689|0.98624589417637,-0.16528471260298822,0.5030479048716915|0.9995393587856177,0.03034913900650494,0.7257589764548551"/>
                    <discreteMappingEntry attributeValue="3431874" value="1.0,0.0,0.25|1.0,0.0,0.5|1.0,0.0,0.75"/>
                    <discreteMappingEntry attributeValue="3431875" value="0.5802580035422245,-0.814432716266477,0.35516951037534705|0.8557651387166103,-0.5173645014468433,0.5136444865520552|0.965558102048308,-0.26018753153998203,0.6291927145825107"/>
                    <discreteMappingEntry attributeValue="3431884" value="0.9669818342057596,-0.2548453105632217,0.4058771357880752|0.9761568961560293,-0.21706615140787622,0.7977201924385796|0.991021006401523,-0.13370626339447406,0.9184206618665087"/>
                    <discreteMappingEntry attributeValue="3431885" value="0.967546310237648,0.25269376237951136,0.25337758274747624|0.9756836601134216,0.2191834742577033,0.5179200485847761|0.9726220141378574,0.23239280886984748,0.7473682292631165"/>
                    <discreteMappingEntry attributeValue="3431886" value="0.9736410844502583,0.22808559505265769,0.3652001143402114|0.9815981507940129,0.19095829481270063,0.7581871921219596|0.9920436157297347,0.12589465631977623,0.939539973997242"/>
                    <discreteMappingEntry attributeValue="3431887" value="0.8303252177450288,-0.5572791336275481,0.29968642626495123|0.9003488337158345,-0.4351689070079991,0.5376090832514336|0.9815908020681229,-0.19099606617744566,0.6962285428767424"/>
                    <discreteMappingEntry attributeValue="3431880" value="0.8288930325088272,0.5594071331850538,0.32281371788770974|0.9580790062115442,0.2865041323553639,0.5218690836489389|0.9813557359542098,0.19220020684112518,0.7752784934046361"/>
                    <discreteMappingEntry attributeValue="3431881" value="0.9933302883172289,-0.11530367865602068,0.2799500971444765|0.9968992083229956,-0.07868906178742124,0.5676594692018954|0.9986728381306277,-0.05150303272737557,0.8355613029864395"/>
                    <discreteMappingEntry attributeValue="3431882" value="0.9377898695266377,-0.34720334188082336,0.37680621960613603|0.9117312345099083,-0.4107872393576005,0.5770498593242944|0.9722668886387714,-0.23387410557110178,0.7833579887467863"/>
                    <discreteMappingEntry attributeValue="3431883" value="0.557711593534061,0.8300348055579949,0.35930221611986635|0.8421838524076468,0.5391904661099034,0.5214419357415587|0.9686186105031376,0.24855178009213907,0.6624865908807555"/>
                    <discreteMappingEntry attributeValue="3431988" value="0.9606443072250285,0.27778141585812594,0.563100781495623|0.9500905314787289,0.3119743290632523,0.9995690760215715|0.994392286747104,0.10575433824607522,1.022001462823303"/>
                    <discreteMappingEntry attributeValue="3431989" value="0.9653044084976521,0.26112717004363606,0.2840134482670024|0.8535383251464546,0.5210300639177985,0.5766950443721579|0.9824996094764369,0.18626464339387927,0.5498220452652608"/>
                    <discreteMappingEntry attributeValue="3431990" value="0.9038600715331682,0.4278282027730946,0.3367869808821505|0.9607856714689414,0.27729207255162436,0.608295501853404|0.9880978568547836,0.15382660783812283,0.7347994744061016"/>
                    <discreteMappingEntry attributeValue="3431991" value="0.6570032714669228,0.7538877245862018,0.25365053670730764|0.5360636776315836,0.8441775485785569,0.3475241341210875|0.8800651823186432,0.4748528981384165,0.6505318959807652"/>
                    <discreteMappingEntry attributeValue="3431984" value="0.9730049551726736,-0.23078422218475733,0.4997287889200986|0.9673432606672285,-0.25346995096400354,0.6679009338876617|0.9991296079845604,-0.041713624256574044,0.8396860330586783"/>
                    <discreteMappingEntry attributeValue="3431985" value="0.9387506569333008,-0.34459716207086805,0.423469920881013|0.9373299297818067,-0.348443112624189,0.7536306606935218|0.9923772851763685,-0.12323686082491976,0.8511278362506635"/>
                    <discreteMappingEntry attributeValue="3431986" value="0.7933920566361519,0.6087109695632708,0.719701994134383|0.9308335440249526,0.3654434474962531,1.0317816563449325|0.9760454132189611,0.21756688933343574,1.171974441880883"/>
                    <discreteMappingEntry attributeValue="3431987" value="0.9999981021220762,0.001948269038324725,0.39220431670751377|0.9993306172720572,-0.03658302041451961,0.5158598300974923|0.9967443643220182,-0.08062674613486448,0.6960973939207644"/>
                    <discreteMappingEntry attributeValue="3431996" value="0.8326695651735138,-0.553770164629471,0.30172808991731725|0.8864419290339263,-0.4628398280729648,0.52120411612932|0.9615969628457884,-0.2744654459959493,0.673648537581183"/>
                    <discreteMappingEntry attributeValue="3431997" value="0.9999999999999999,1.4901161193847656E-8,0.25|0.9999999999999999,1.4901161193847656E-8,0.5|1.0,0.0,0.75"/>
                    <discreteMappingEntry attributeValue="3431998" value="0.8890243081252209,0.45785999995901827,0.49760610436346037|0.8358771577479032,0.5489165484436473,0.7516423837788062|0.908977217103851,0.4168457973713282,0.8982125983121084"/>
                    <discreteMappingEntry attributeValue="3431999" value="0.8042819149660865,-0.5942479291158572,0.3688467429450727|0.9123857231751229,-0.4093315186327679,0.5030886430618514|0.9727033883577524,-0.2320519732244213,0.7258043184580902"/>
                    <discreteMappingEntry attributeValue="3431992" value="0.9365840958020079,0.35044290760512675,0.22147198933218426|0.9571605685146225,0.2895576731512474,0.4384705482159577|0.9857028822974326,0.16849281240021385,0.6857780269193078"/>
                    <discreteMappingEntry attributeValue="3431993" value="0.6971673351594759,0.7169084368220497,0.26084934810379623|0.909296520652322,0.4161488165663592,0.51414822756364|0.986064492448147,0.16636350781640272,0.754486994111502"/>
                    <discreteMappingEntry attributeValue="3431994" value="0.9976025366402116,0.0692038935972196,0.27004603878668854|0.9987805473919037,0.049370215226685187,0.6252955190256665|0.9988259033514443,0.04844393454470121,1.109088037873954"/>
                    <discreteMappingEntry attributeValue="3431995" value="0.9773003542183403,0.2118584849485775,0.43689345778658173|0.9403455912790109,0.34022076503665594,0.654749604292872|0.9775651203030187,0.21063341512434494,0.7861046759758384"/>
                    <discreteMappingEntry attributeValue="3431972" value="0.9718907492112228,0.23543230788837818,0.3777064727273408|0.9965086613528065,-0.08348944752983863,0.5193632472241716|0.939585684591219,-0.3423138053179425,0.7541256841164835"/>
                    <discreteMappingEntry attributeValue="3431973" value="0.9143927779695402,-0.40482817045895797,0.3527614380007944|0.9806093052299041,-0.1959729330711892,0.6448974775179772|0.9995599783296264,-0.02966226089961463,0.8439322256743766"/>
                    <discreteMappingEntry attributeValue="3431974" value="0.44717285966836706,0.8944475577561912,0.4583970455052034|0.2388459640678742,0.9710574676343763,1.2510147225318098|0.5835286561658336,0.8120925485640761,1.2669165038422314"/>
                    <discreteMappingEntry attributeValue="3431975" value="0.9105979546735162,0.4132933158719227,0.5796551775025228|0.9216191989579566,0.3880954162472089,0.689583267239784|0.9945267048093872,0.10448269436122902,0.7629701036495454"/>
                    <discreteMappingEntry attributeValue="3431968" value="1.0,0.0,0.25|1.0,0.0,0.5|1.0,0.0,0.7500000000000001"/>
                    <discreteMappingEntry attributeValue="3431969" value="1.0,0.0,0.25|1.0,0.0,0.5|1.0,0.0,0.75"/>
                    <discreteMappingEntry attributeValue="3431970" value="0.8646051009289832,0.5024520071087215,0.5211941674930498|0.9821094565173026,0.18831095406079923,0.7280455639108516|0.996459073104199,-0.08407922233418058,1.0647387864114204"/>
                    <discreteMappingEntry attributeValue="3431971" value="0.32035844513216843,0.9472963985113104,0.6093278976831151|0.5751945405849657,0.8180166504914496,0.817332170381805|0.8363896976119367,0.548135269553614,0.8384393181231435"/>
                    <discreteMappingEntry attributeValue="3431980" value="0.9111134899347733,-0.412155563420995,0.37470432059075676|0.8611691121066364,-0.5083185618816881,0.6569302764250372|0.9522322007065516,-0.30537491045853404,0.739951340891334"/>
                    <discreteMappingEntry attributeValue="3431981" value="1.0,0.0,0.25|1.0,0.0,0.5|1.0,0.0,0.7500000000000001"/>
                    <discreteMappingEntry attributeValue="3431982" value="0.7925327264813173,-0.6098293838903546,0.2981750326116053|0.9327496378047584,-0.36052477470361455,0.514177935009165|0.9934081096199275,-0.1146312686022537,0.7347637754530281"/>
                    <discreteMappingEntry attributeValue="3431983" value="0.9966282514341978,-0.08204954870816476,0.43004468783428046|0.9999823618473326,0.0059393597491995695,0.7389008788911636|0.9856350504339083,-0.16888915701177215,0.7954720145340627"/>
                    <discreteMappingEntry attributeValue="3431976" value="0.981471100491278,-0.19161022650276208,0.3324671273954497|0.957376881710108,-0.28884166314268067,0.5684820202143058|0.9697342061357765,-0.2441629977089388,0.8291484819977002"/>
                    <discreteMappingEntry attributeValue="3431977" value="0.6554265121886004,0.7552589536842886,0.7410376772874203|0.8438441547148482,0.536588336207174,0.990840022152032|0.9820276282266036,0.1887372178443658,1.0229062083174694"/>
                    <discreteMappingEntry attributeValue="3431978" value="0.9971791971836743,-0.07505763588151959,0.24868865870566137|0.9829801012947644,-0.1837120585550515,0.4341298940143581|0.9879932819406269,-0.15449684411077466,0.6206107968690672"/>
                    <discreteMappingEntry attributeValue="3431979" value="0.9891187616925163,0.1471192552586611,0.2596373918385215|0.9846399237152906,0.1745973099046679,0.5635260993821313|0.9988397899416512,-0.04815676514590693,0.7443592139823959"/>
                    <discreteMappingEntry attributeValue="3431956" value="0.8711284432240485,0.49105522643186045,0.15588901483782247|0.964794985686772,0.263003109475271,0.3536371423185205|0.9797890225748324,0.20003367526957716,0.667258984548322"/>
                    <discreteMappingEntry attributeValue="3431957" value="0.9496757215666359,0.31323477435765235,0.16317291576980447|0.9607224362317565,0.2775110817984007,0.30154100751109997|0.9987203921511048,0.050572505391205815,0.7752649624115964"/>
                    <discreteMappingEntry attributeValue="3431958" value="1.0,0.0,0.25|1.0,0.0,0.5|1.0,0.0,0.75"/>
                    <discreteMappingEntry attributeValue="3431959" value="1.0,0.0,0.25|1.0,0.0,0.5|1.0,0.0,0.75"/>
                    <discreteMappingEntry attributeValue="3431952" value="0.985004200984625,0.17253035687275556,0.24977734499527862|0.9857829997012182,0.16802344330499855,0.49791975032428937|0.9968959820204198,0.07872992462553709,0.7108025115792674"/>
                    <discreteMappingEntry attributeValue="3431953" value="0.8634208855972756,0.5044842656757655,0.263540743873348|0.7874755558181977,0.6163458842150408,0.5065926998099357|0.9423093035566523,0.33474344867461836,0.766906315873138"/>
                    <discreteMappingEntry attributeValue="3431954" value="0.99933771435781,0.03638863369388928,0.3332611513861247|0.9832214267889497,0.1824160790695325,0.46012740836642024|0.9947901414151811,0.1019439774737284,0.715014518576034"/>
                    <discreteMappingEntry attributeValue="3431955" value="-0.10737466866019608,-0.9942186281347343,0.07381809563382387|0.993117910335297,-0.11711881220048763,0.3518791219540577|0.9993556359236542,-0.035893076597427104,0.6825082112351675"/>
                    <discreteMappingEntry attributeValue="3431964" value="0.6194220420248223,0.785058172273749,0.47065885346239306|0.8543161360016114,0.519753729921466,0.6429697786024433|0.9568243298735816,0.290666822602738,0.8395955823768595"/>
                    <discreteMappingEntry attributeValue="3431965" value="0.9374805785631358,0.3480375910974677,0.3995801966661386|0.9521020524355638,0.3057804469680606,0.6042567232863881|0.9975705834768132,0.0696629814301007,0.836215090796065"/>
                    <discreteMappingEntry attributeValue="3431966" value="1.0,0.0,0.25|1.0,0.0,0.5|1.0,0.0,0.7500000000000001"/>
                    <discreteMappingEntry attributeValue="3431967" value="0.8857429049296247,-0.46417615876607643,0.26010384400636705|0.9816016879993962,-0.19094011133529823,0.5344542372736686|0.9945961568862327,-0.10381948134688583,0.7686554704674001"/>
                    <discreteMappingEntry attributeValue="3431960" value="0.3285542211746291,-0.9444851103899589,0.07380684050365646|0.9274882653534289,0.3738522671212353,0.2951401207657644|0.9015780734374315,0.4326164323010043,0.5726695784999937"/>
                    <discreteMappingEntry attributeValue="3431961" value="0.9926463415968964,-0.12105057007010647,0.37446249397546916|0.9983362190422347,0.05766102451791164,0.5360986557138507|0.9932618673891811,0.11589159930968607,0.6777218227850852"/>
                    <discreteMappingEntry attributeValue="3431962" value="0.9681991341846741,0.2501808077452135,0.12761164104519174|0.9995564753809547,0.029780069241069212,0.404909321893536|0.9981981965875997,-0.06000300266873081,0.702717004076617"/>
                    <discreteMappingEntry attributeValue="3431963" value="0.9609770350892392,-0.27662815842046024,0.3036661103604143|0.9553072431392319,-0.2956147344191769,0.48454583009852265|0.9841968549942772,-0.17707780950580354,0.6168920758349999"/>
                    <discreteMappingEntry attributeValue="3431940" value="-0.025104960191694493,0.9996848208179283,0.2041706786674564|0.5757780252733541,0.8176060577150324,0.2598512377161849|0.97374662191483,0.22763461140489416,0.5571149683317242"/>
                    <discreteMappingEntry attributeValue="3431941" value="0.8997903018038462,0.436322601729206,0.6278784502786894|0.8757158380783562,0.4828268539950137,0.8604026939175501|0.9446713459938592,0.32801836542814256,0.9256156912173151"/>
                    <discreteMappingEntry attributeValue="3431942" value="0.9151607848060687,0.40308899507818435,0.13624554329293806|0.9111521778357399,-0.4120700290304893,0.42657997916808943|0.9987739194419429,-0.04950411945060008,0.6860755505276735"/>
                    <discreteMappingEntry attributeValue="3431943" value="0.9428492579759267,0.3332195623522792,0.4966730837432817|0.9157495755883888,0.4017495672800232,0.6956321020274199|0.9725745021635402,0.23259156850870982,0.7494044639715849"/>
                    <discreteMappingEntry attributeValue="3431936" value="0.950104120293853,-0.31193294247424974,0.24490059789662955|0.9990996855343466,-0.04242426623018684,0.5820130583234606|0.9998704414677987,0.01609659215453256,0.8124606392803578"/>
                    <discreteMappingEntry attributeValue="3431937" value="1.0,0.0,0.25|1.0,0.0,0.5|1.0,0.0,0.75"/>
                    <discreteMappingEntry attributeValue="3431938" value="0.8223657335801011,-0.5689592254575561,0.27619263057567267|0.9374762475255434,-0.3480492570390377,0.4985351914065079|0.9820076652765257,-0.18884105840136306,0.6993341271828009"/>
                    <discreteMappingEntry attributeValue="3431939" value="0.5053399376072175,0.8629203598589695,0.49924169511980493|0.8578203416450246,0.5139496682166583,0.691312321087975|0.9531334216531726,0.3025502942119136,0.855836811587434"/>
                    <discreteMappingEntry attributeValue="3431948" value="0.9610131019912609,0.27650283506889106,0.5709763243718853|0.9530551312728656,0.3027968242146225,0.7806551066040145|0.9922199830372608,0.12449700904655474,0.8603777422405893"/>
                    <discreteMappingEntry attributeValue="3431949" value="0.5568487601093874,0.830613904509573,0.16801065686903013|0.7424062738731746,0.6699499417969591,0.34547334029402144|0.8880962241450828,0.45965758631751835,0.6522644275825293"/>
                    <discreteMappingEntry attributeValue="3431950" value="0.9856823357226598,-0.16861296819735333,0.24293897752704327|0.9864414664034994,-0.1641134770812982,0.4874879021979968|0.996438705731216,-0.08432025688231276,0.7724230401251936"/>
                    <discreteMappingEntry attributeValue="3431951" value="0.7550335447841611,0.6556861644496277,0.12998883976081432|0.9115994400706571,0.41107962837249,0.2724110527871757|0.9846923356883638,0.17430147456804457,0.5132226379862792"/>
                    <discreteMappingEntry attributeValue="3431944" value="0.12606596649677695,0.9920218606922095,0.31714426571645216|0.9302599272504181,0.36690116891616315,0.5642800798949256|0.9945544556143868,0.10421820770657435,1.0556321904270767"/>
                    <discreteMappingEntry attributeValue="3431945" value="0.5529635167326133,0.8332054663543086,0.1774147856580397|0.9979560441205064,-0.06390410005116913,0.33332062450953415|0.9403301639486654,-0.34026340204064853,0.6208565256448804"/>
                    <discreteMappingEntry attributeValue="3431946" value="0.9577506035536276,0.28760003719169097,0.2266292277334561|0.9038740389203789,0.4277986930388654,0.4215392584892817|0.9951402114257452,0.09846806387617879,0.6480305179191961"/>
                    <discreteMappingEntry attributeValue="3431947" value="0.6994008455176367,0.7147296392967168,0.38724763057389283|0.9304784094114231,0.36634673414565616,0.6030243086200787|0.9938097041881501,0.11109577787414632,0.7683535073631617"/>
                    <discreteMappingEntry attributeValue="3432052" value="0.7247457946194714,-0.6890163518969568,0.3228117821977917|0.8471851903248109,-0.5312977068408201,0.45051637138084877|0.9278549340215836,-0.37294131094825467,0.6135254190814862"/>
                    <discreteMappingEntry attributeValue="3432053" value="0.9634190943334673,0.2679993445396493,0.4733747043404427|0.7352526388330338,0.6777931521408728,0.8055481482474669|0.8802299343887799,0.47454742924804066,1.0444410571462401"/>
                    <discreteMappingEntry attributeValue="3432054" value="0.9882835298954228,-0.1526291732842807,0.33290574550083696|0.9424359824309063,0.3343866310418113,0.5622310880120167|0.9955617997704059,0.09411005704976579,0.7469225993990833"/>
                    <discreteMappingEntry attributeValue="3432055" value="0.9380615397084717,0.3464686821630078,0.3714926058704543|0.9620966512132388,0.27270869755889976,0.5567566962753853|0.9667868976964451,0.2555838305575754,0.7695490902879166"/>
                    <discreteMappingEntry attributeValue="3432048" value="0.8341088395046387,0.5515998947246318,0.28911783230201116|0.5273203968927085,0.8496665222432366,0.5147825083259712|0.7020876407958485,0.7120905452551098,0.6595150038098432"/>
                    <discreteMappingEntry attributeValue="3432049" value="0.9908223440296627,-0.13517056843693695,0.2815765482048606|0.9274183035742574,0.3740257881422705,0.4499626426137543|0.9931992285486003,0.11642719789836559,0.561964277355286"/>
                    <discreteMappingEntry attributeValue="3432050" value="0.9863566982481523,0.16462218508148715,0.49159031834278144|0.9962449181635611,0.08657980730678182,0.7452615983425437|0.9982902692088244,0.05845116254594939,1.018815203750986"/>
                    <discreteMappingEntry attributeValue="3432051" value="0.9849097402918343,-0.17306878250646907,0.3873277129357225|0.9680790263770176,-0.2506451649023489,0.583085119775235|0.961350339033536,-0.27532803279017104,0.7854690637739755"/>
                    <discreteMappingEntry attributeValue="3432060" value="0.9177289967365679,-0.3972071103956883,1.203071216534263|0.9618829584032488,-0.27346146773067315,1.2296788389870137|0.9971148964022403,-0.0759070706373896,1.1276301114233132"/>
                    <discreteMappingEntry attributeValue="3432061" value="0.3693383621660765,-0.9292949877366606,0.7195412369627392|0.6837047361525788,-0.7297587503843531,0.7773917484622761|0.7029219022162105,-0.7112670380277326,0.7523199344598073"/>
                    <discreteMappingEntry attributeValue="3432062" value="0.7428397425348778,-0.669469280035101,0.9259772526251816|0.8157191603544132,-0.5784481406579947,0.942691480114474|0.9986620706105731,-0.051711398393417075,0.8793084968251684"/>
                    <discreteMappingEntry attributeValue="3432063" value="0.7910898722771486,-0.6116999378621226,0.5215486535206971|0.8569776599898067,-0.515353558519193,0.5375872907021167|0.9976384935751742,-0.06868359438073333,0.7376142321309946"/>
                    <discreteMappingEntry attributeValue="3432056" value="0.9902200174660546,0.13951457633353778,0.32147906315146163|0.9976958251130198,0.06784571137552187,0.480291707079729|0.9988516189007137,0.04791078604472439,0.6602978284381599"/>
                    <discreteMappingEntry attributeValue="3432057" value="0.6179903694785394,-0.7861856671498014,0.5939232563546794|0.8594981942013281,-0.5111387817067455,0.6295107946620138|0.8695806256598178,-0.4937909835923292,0.6010800859357129"/>
                    <discreteMappingEntry attributeValue="3432058" value="0.9694460957970933,-0.2453044380841346,0.36922387422823555|0.9906626811086052,-0.1363358069573432,0.38781696935366755|0.9986801810924978,-0.05136045067029518,0.55051496526364"/>
                    <discreteMappingEntry attributeValue="3432059" value="0.9804507651270176,-0.19676457293386387,0.4873643750200303|0.9919816407437725,-0.12638205737877944,0.4939692517893472|0.9991023568277344,-0.04236130995692264,0.6917345026657827"/>
                    <discreteMappingEntry attributeValue="3432036" value="0.8098031764066412,0.5867016409400218,0.6588067343595192|0.7705370103821655,0.6373952585572901,1.166849192050903|0.9143819709653392,0.40485257955648685,1.2848829396840333"/>
                    <discreteMappingEntry attributeValue="3432037" value="0.9422977390333102,0.334776001249659,0.3993854639188156|0.9021589125315201,0.431403867089697,0.7280646508143681|0.9859281429426479,0.16716966517182993,0.7788364980568638"/>
                    <discreteMappingEntry attributeValue="3432038" value="0.9633454611038005,0.26826390471083883,0.21689287918364855|0.9660095616203515,0.25850633813904145,0.44192633832277567|0.9605536160136233,0.27809485928933075,0.6975532803304003"/>
                    <discreteMappingEntry attributeValue="3432039" value="0.9999988514476759,0.001515619783818502,0.5252676872843489|0.994870190499876,0.10115979465548754,0.55034805031732|0.9993447702362357,0.03619433935693944,0.7270235944628897"/>
                    <discreteMappingEntry attributeValue="3432032" value="0.7293436502951903,0.6841475277848245,0.24466071223097105|0.8884273529836577,0.45901725291153406,0.4600528026550668|0.9846160962272454,0.17473163151020982,0.6897968118843864"/>
                    <discreteMappingEntry attributeValue="3432033" value="0.3677461285463182,0.9299262255357652,0.4591006047858597|0.3817337876023605,0.9242723166917615,0.7979803259127874|0.6091412680852754,0.7930617349963763,0.8867756921370838"/>
                    <discreteMappingEntry attributeValue="3432034" value="0.8681003695046012,0.4963887070290528,0.3338689521641877|0.8424320128693525,0.5388026574664336,0.5678877834163353|0.9548799722874254,0.2969919839395766,0.6608293576502825"/>
                    <discreteMappingEntry attributeValue="3432035" value="0.9262230300849487,-0.37697599199452514,0.23916302498050004|0.9262381559047866,-0.37693882599979023,0.4842553524992733|0.9344433867490393,-0.35611171977482775,0.766024926045262"/>
                    <discreteMappingEntry attributeValue="3432044" value="0.49525036356666846,0.8687502963378388,0.3616552866300686|0.46737245086311996,0.8840605138644076,0.6314021413576482|0.6908365338117841,0.7230109843916064,0.7056670852923674"/>
                    <discreteMappingEntry attributeValue="3432045" value="0.9994263373942653,-0.0338673312010867,0.38587786597874774|0.9990779398695073,0.04293332116318402,0.6702293318037835|0.9997032672844915,0.024359338675597312,0.7127448295045314"/>
[truncated: 102,884 more chars]
