# Supplementary material for: A zebrafish screen reveals Renin-angiotensin system inhibitors as neuroprotective via mitochondrial restoration in dopamine neurons
Source: eLife journal article supplement (doi:10.7554/elife.69795), 2021-09-22
Supplement: fig5-data4 [file elife-69795-fig5-data4-v1.cys › CytoscapeSession-2021_03_12-09_32/tables/35-From+cyREST/LOCAL_ATTRS-org.cytoscape.model.CyNode-35+default+node.cytable]

CyCSV-Version	1
SUID	name	selected
java.lang.Long	java.lang.String	java.lang.Boolean
35 default node
229		false
228		false
227		false
226		false
225		false
224		false
223		false
222		false
221		false
220		false
219		false
218		false
217		false
216		false
215		false
214		false
213		false
212		false
211		false
210		false
209		false
208		false
207		false
206		false
205		false
204		false
203		false
202		false
201		false
200		false
199		false
198		false
197		false
196		false
195		false
194		false
193		false
192		false
191		false
190		false
189		false
188		false
187		false
186		false
185		false
184		false
183		false
182		false
181		false
180		false
179		false
178		false
177		false
176		false
175		false
174		false
173		false
172		false
171		false
170		false
169		false
168		false
167		false
166		false
165		false
164		false
163		false
162		false
161		false
160		false
159		false
158		false
157		false
156		false
155		false
154		false
153		false
152		false
151		false
150		false
149		false
148		false
147		false
146		false
145		false
144		false
143		false
142		false
141		false
140		false
139		false
138		false
137		false
136		false
135		false
134		false
133		false
132		false
131		false
130		false
129		false
128		false
127		false
126		false
125		false
124		false
123		false
122		false
121		false
120		false
119		false
118		false
117		false
116		false
115		false
114		false
113		false
112		false
111		false
110		false
109		false
108		false
107		false
106		false
105		false
104		false
103		false
102		false
101		false
100		false
99		false
98		false
97		false
96		false
95		false
94		false
93		false
92		false
91		false
90		false
89		false
88		false
87		false
86		false
85		false
84		false
83		false
82		false
81		false
80		false
79		false
78		false
77		false
76		false
75		false
74		false
73		false
72		false
71		false
70		false
69		false
68		false
67		false
66		false
65		false
64		false
63		false
62		false
61		false
