# Supplementary material for: A zebrafish screen reveals Renin-angiotensin system inhibitors as neuroprotective via mitochondrial restoration in dopamine neurons
Source: eLife journal article supplement (doi:10.7554/elife.69795), 2021-09-22
Supplement: fig5-data4 [file elife-69795-fig5-data4-v1.cys › CytoscapeSession-2021_03_12-09_32/tables/35-From+cyREST/SHARED_ATTRS-org.cytoscape.model.CyEdge-35+shared+edge.cytable]

CyCSV-Version	1
SUID	Gene_A	Gene_B	Name_A	Name_B	SCORE	shared interaction	shared name	source	source_original	target	target_original	TYPE
java.lang.Long	java.lang.String	java.lang.String	java.lang.String	java.lang.String	java.lang.Double	java.lang.String	java.lang.String	java.lang.String	java.lang.String	java.lang.String	java.lang.String	java.lang.String
	mutable	mutable	mutable	mutable	mutable			mutable	mutable	mutable	mutable	mutable
35 shared edge
230	GO:0006119	ko05016	GO:0006119	ko05016	0.8096280087531379	Direct		1		150		Direct
253	ko00190	ko05016	ko00190	ko05016	0.8277014481994056	Direct		2		150		Direct
255	hsa05016	ko05016	hsa05016	ko05016	0.9802586793737625	Direct		3		150		Direct
258	GO:0006091	ko05016	GO:0006091	ko05016	0.6216676120255799	Direct		4		150		Direct
270	GO:0046034	ko05016	GO:0046034	ko05016	0.7223994894708392	Direct		5		150		Direct
278	GO:0009205	ko05016	GO:0009205	ko05016	0.7084511467174648	Direct		6		150		Direct
288	R-HSA-163200	ko05016	R-HSA-163200	ko05016	0.7586989409990166	Direct		7		150		Direct
293	GO:0022900	ko05016	GO:0022900	ko05016	0.6259405231107739	Direct		8		150		Direct
301	GO:0009144	ko05016	GO:0009144	ko05016	0.7084511467174648	Direct		9		150		Direct
1098	GO:0098662	ko05016	GO:0098662	ko05016	0.3522654754319582	Direct		160		150		Direct
489	GO:1902600	ko05016	GO:1902600	ko05016	0.5106571936069443	Direct		37		150		Direct
717	hsa04260	ko05016	hsa04260	ko05016	0.3511673151769274	Direct		70		150		Direct
508	GO:0015672	ko05016	GO:0015672	ko05016	0.3865791393156666	Direct		40		150		Direct
721	ko04260	ko05016	ko04260	ko05016	0.3642252117606818	Direct		71		150		Direct
750	GO:0009060	ko05016	GO:0009060	ko05016	0.33158721844100364	Direct		77		150		Direct
231	GO:0006119	ko00190	GO:0006119	ko00190	0.9315499606610531	Direct		1		2		Direct
232	GO:0006119	hsa05016	GO:0006119	hsa05016	0.7922636103156177	Direct		1		3		Direct
259	GO:0006091	GO:0006119	GO:0006091	GO:0006119	0.7264150943400904	Direct		4		1		Direct
233	GO:0006119	GO:0046034	GO:0006119	GO:0046034	0.8449197860965574	Direct		1		5		Direct
234	GO:0006119	GO:0009205	GO:0006119	GO:0009205	0.8284023668642325	Direct		1		6		Direct
235	GO:0006119	R-HSA-163200	GO:0006119	R-HSA-163200	0.8603531300163764	Direct		1		7		Direct
236	GO:0006119	GO:0022900	GO:0006119	GO:0022900	0.7146101438310581	Direct		1		8		Direct
237	GO:0006119	GO:0009144	GO:0006119	GO:0009144	0.8284023668642325	Direct		1		9		Direct
238	GO:0006119	GO:0098662	GO:0006119	GO:0098662	0.41844919786209006	Direct		1		160		Direct
239	GO:0006119	GO:1902600	GO:0006119	GO:1902600	0.6118546845135046	Direct		1		37		Direct
240	GO:0006119	R-HSA-163210	GO:0006119	R-HSA-163210	0.38297872340637007	Direct		1		38		Direct
241	GO:0006119	GO:0042776	GO:0006119	GO:0042776	0.38297872340637007	Direct		1		39		Direct
242	GO:0006119	hsa04260	GO:0006119	hsa04260	0.386892177591732	Direct		1		70		Direct
243	GO:0006119	GO:0015672	GO:0006119	GO:0015672	0.46296296296416445	Direct		1		40		Direct
244	GO:0006119	GO:1990542	GO:0006119	GO:1990542	0.3130792996930916	Direct		1		41		Direct
245	GO:0006119	GO:0007007	GO:0006119	GO:0007007	0.35267857143066605	Direct		1		42		Direct
246	GO:0006119	ko04260	GO:0006119	ko04260	0.40173724213000545	Direct		1		71		Direct
247	GO:0006119	GO:0015985	GO:0006119	GO:0015985	0.38297872340637007	Direct		1		43		Direct
248	GO:0006119	GO:0015986	GO:0006119	GO:0015986	0.38297872340637007	Direct		1		44		Direct
1063	CORUM:2920	GO:0006119	CORUM:2920	GO:0006119	0.3288672350815427	Direct		153		1		Direct
249	GO:0006119	WP4922	GO:0006119	WP4922	0.3144208037848556	Direct		1		73		Direct
250	GO:0006119	GO:0006123	GO:0006119	GO:0006123	0.3288672350815427	Direct		1		74		Direct
251	GO:0006119	GO:0019646	GO:0006119	GO:0019646	0.3288672350815427	Direct		1		75		Direct
252	GO:0006119	GO:0009060	GO:0006119	GO:0009060	0.3673938002317276	Direct		1		77		Direct
256	hsa05016	ko00190	hsa05016	ko00190	0.8097205346298068	Direct		3		2		Direct
260	GO:0006091	ko00190	GO:0006091	ko00190	0.6707827126076209	Direct		4		2		Direct
271	GO:0046034	ko00190	GO:0046034	ko00190	0.8227303599731813	Direct		5		2		Direct
279	GO:0009205	ko00190	GO:0009205	ko00190	0.8063439065112263	Direct		6		2		Direct
289	R-HSA-163200	ko00190	R-HSA-163200	ko00190	0.8812124522121882	Direct		7		2		Direct
294	GO:0022900	ko00190	GO:0022900	ko00190	0.6420213449924429	Direct		8		2		Direct
302	GO:0009144	ko00190	GO:0009144	ko00190	0.8063439065112263	Direct		9		2		Direct
1099	GO:0098662	ko00190	GO:0098662	ko00190	0.42879782658025095	Direct		160		2		Direct
490	GO:1902600	ko00190	GO:1902600	ko00190	0.6870503597131206	Direct		37		2		Direct
500	R-HSA-163210	ko00190	R-HSA-163210	ko00190	0.39731051344956925	Direct		38		2		Direct
502	GO:0042776	ko00190	GO:0042776	ko00190	0.39731051344956925	Direct		39		2		Direct
718	hsa04260	ko00190	hsa04260	ko00190	0.4002177068233738	Direct		70		2		Direct
509	GO:0015672	ko00190	GO:0015672	ko00190	0.5208497246273719	Direct		40		2		Direct
524	GO:1990542	ko00190	GO:1990542	ko00190	0.3240331979536925	Direct		41		2		Direct
528	GO:0007007	ko00190	GO:0007007	ko00190	0.36545105566430786	Direct		42		2		Direct
254	ko00190	ko04260	ko00190	ko04260	0.4157806379425792	Direct		2		71		Direct
539	GO:0015985	ko00190	GO:0015985	ko00190	0.39731051344956925	Direct		43		2		Direct
547	GO:0015986	ko00190	GO:0015986	ko00190	0.39731051344956925	Direct		44		2		Direct
1064	CORUM:2920	ko00190	CORUM:2920	ko00190	0.3416018499078109	Direct		153		2		Direct
724	WP4922	ko00190	WP4922	ko00190	0.326405867973048	Direct		73		2		Direct
728	GO:0006123	ko00190	GO:0006123	ko00190	0.3416018499078109	Direct		74		2		Direct
740	GO:0019646	ko00190	GO:0019646	ko00190	0.3416018499078109	Direct		75		2		Direct
751	GO:0009060	ko00190	GO:0009060	ko00190	0.3809053172585037	Direct		77		2		Direct
261	GO:0006091	hsa05016	GO:0006091	hsa05016	0.6101568334584375	Direct		4		3		Direct
272	GO:0046034	hsa05016	GO:0046034	hsa05016	0.7082984073768939	Direct		5		3		Direct
280	GO:0009205	hsa05016	GO:0009205	hsa05016	0.6947368421058112	Direct		6		3		Direct
290	R-HSA-163200	hsa05016	R-HSA-163200	hsa05016	0.7417120237511743	Direct		7		3		Direct
295	GO:0022900	hsa05016	GO:0022900	hsa05016	0.6120628960345867	Direct		8		3		Direct
303	GO:0009144	hsa05016	GO:0009144	hsa05016	0.6947368421058112	Direct		9		3		Direct
1100	GO:0098662	hsa05016	GO:0098662	hsa05016	0.3436714165980111	Direct		160		3		Direct
491	GO:1902600	hsa05016	GO:1902600	hsa05016	0.4968189705044472	Direct		37		3		Direct
719	hsa04260	hsa05016	hsa04260	hsa05016	0.3954516740383008	Direct		70		3		Direct
510	GO:0015672	hsa05016	GO:0015672	hsa05016	0.376790830946853	Direct		40		3		Direct
257	hsa05016	ko04260	hsa05016	ko04260	0.3530552861317908	Direct		3		71		Direct
752	GO:0009060	hsa05016	GO:0009060	hsa05016	0.3210044112676986	Direct		77		3		Direct
262	GO:0006091	GO:0046034	GO:0006091	GO:0046034	0.814366998577812	Direct		4		5		Direct
263	GO:0006091	GO:0009205	GO:0006091	GO:0009205	0.8012651555090017	Direct		4		6		Direct
264	GO:0006091	R-HSA-163200	GO:0006091	R-HSA-163200	0.6136455389590961	Direct		4		7		Direct
265	GO:0006091	GO:0022900	GO:0006091	GO:0022900	0.746847720659981	Direct		4		8		Direct
266	GO:0006091	GO:0009144	GO:0006091	GO:0009144	0.8012651555090017	Direct		4		9		Direct
267	GO:0006091	GO:1902600	GO:0006091	GO:1902600	0.4092349479414081	Direct		4		37		Direct
268	GO:0006091	GO:0015672	GO:0006091	GO:0015672	0.3502358490577147	Direct		4		40		Direct
269	GO:0006091	GO:0009168	GO:0006091	GO:0009168	0.4201333026901962	Direct		4		45		Direct
281	GO:0009205	GO:0046034	GO:0009205	GO:0046034	0.9830310122879165	Direct		6		5		Direct
273	GO:0046034	R-HSA-163200	GO:0046034	R-HSA-163200	0.7197422917631013	Direct		5		7		Direct
296	GO:0022900	GO:0046034	GO:0022900	GO:0046034	0.6374204869495842	Direct		8		5		Direct
304	GO:0009144	GO:0046034	GO:0009144	GO:0046034	0.9830310122879165	Direct		9		5		Direct
274	GO:0046034	GO:0098662	GO:0046034	GO:0098662	0.38053797468461026	Direct		5		160		Direct
275	GO:0046034	GO:1902600	GO:0046034	GO:1902600	0.5394388565389114	Direct		5		37		Direct
276	GO:0046034	hsa04260	GO:0046034	hsa04260	0.30280480824443773	Direct		5		70		Direct
511	GO:0015672	GO:0046034	GO:0015672	GO:0046034	0.41844919786209006	Direct		40		5		Direct
277	GO:0046034	ko04260	GO:0046034	ko04260	0.3137598597738742	Direct		5		71		Direct
554	GO:0009168	GO:0046034	GO:0009168	GO:0046034	0.5540868626932502	Direct		45		5		Direct
282	GO:0009205	R-HSA-163200	GO:0009205	R-HSA-163200	0.7048846675718154	Direct		6		7		Direct
283	GO:0009205	GO:0022900	GO:0009205	GO:0022900	0.6244739397870438	Direct		6		8		Direct
305	GO:0009144	GO:0009205	GO:0009144	GO:0009205	1.0	Direct		9		6		Direct
284	GO:0009205	GO:0098662	GO:0009205	GO:0098662	0.3721474546529084	Direct		6		160		Direct
285	GO:0009205	GO:1902600	GO:0009205	GO:1902600	0.526438569207911	Direct		6		37		Direct
286	GO:0009205	GO:0015672	GO:0009205	GO:0015672	0.40894148586568957	Direct		6		40		Direct
287	GO:0009205	ko04260	GO:0009205	ko04260	0.30509199829012873	Direct		6		71		Direct
555	GO:0009168	GO:0009205	GO:0009168	GO:0009205	0.5405940594069959	Direct		45		6		Direct
297	GO:0022900	R-HSA-163200	GO:0022900	R-HSA-163200	0.5665967488211249	Direct		8		7		Direct
306	GO:0009144	R-HSA-163200	GO:0009144	R-HSA-163200	0.7048846675718154	Direct		9		7		Direct
1101	GO:0098662	R-HSA-163200	GO:0098662	R-HSA-163200	0.3193741371389604	Direct		160		7		Direct
492	GO:1902600	R-HSA-163200	GO:1902600	R-HSA-163200	0.5325721961061339	Direct		37		7		Direct
291	R-HSA-163200	R-HSA-163210	R-HSA-163200	R-HSA-163210	0.4126582278502573	Direct		7		38		Direct
503	GO:0042776	R-HSA-163200	GO:0042776	R-HSA-163200	0.4126582278502573	Direct		39		7		Direct
512	GO:0015672	R-HSA-163200	GO:0015672	R-HSA-163200	0.3948635634042975	Direct		40		7		Direct
525	GO:1990542	R-HSA-163200	GO:1990542	R-HSA-163200	0.33563636363846516	Direct		41		7		Direct
529	GO:0007007	R-HSA-163200	GO:0007007	R-HSA-163200	0.3790642347364802	Direct		42		7		Direct
540	GO:0015985	R-HSA-163200	GO:0015985	R-HSA-163200	0.4126582278502573	Direct		43		7		Direct
548	GO:0015986	R-HSA-163200	GO:0015986	R-HSA-163200	0.4126582278502573	Direct		44		7		Direct
1065	CORUM:2920	R-HSA-163200	CORUM:2920	R-HSA-163200	0.3552746294706227	Direct		153		7		Direct
556	GO:0009168	R-HSA-163200	GO:0009168	R-HSA-163200	0.3104755341164711	Direct		45		7		Direct
292	R-HSA-163200	WP4922	R-HSA-163200	WP4922	0.33924050633153946	Direct		7		73		Direct
753	GO:0009060	R-HSA-163200	GO:0009060	R-HSA-163200	0.3242027800514636	Direct		77		7		Direct
307	GO:0009144	GO:0022900	GO:0009144	GO:0022900	0.6244739397870438	Direct		9		8		Direct
298	GO:0022900	hsa04260	GO:0022900	hsa04260	0.3743150684950148	Direct		8		70		Direct
299	GO:0022900	ko04260	GO:0022900	ko04260	0.3885081707978631	Direct		8		71		Direct
1066	CORUM:2920	GO:0022900	CORUM:2920	GO:0022900	0.31697742885414876	Direct		153		8		Direct
300	GO:0022900	WP4922	GO:0022900	WP4922	0.3032036613295426	Direct		8		73		Direct
729	GO:0006123	GO:0022900	GO:0006123	GO:0022900	0.31697742885414876	Direct		74		8		Direct
741	GO:0019646	GO:0022900	GO:0019646	GO:0022900	0.31697742885414876	Direct		75		8		Direct
308	GO:0009144	GO:0098662	GO:0009144	GO:0098662	0.3721474546529084	Direct		9		160		Direct
309	GO:0009144	GO:1902600	GO:0009144	GO:1902600	0.526438569207911	Direct		9		37		Direct
310	GO:0009144	GO:0015672	GO:0009144	GO:0015672	0.40894148586568957	Direct		9		40		Direct
311	GO:0009144	ko04260	GO:0009144	ko04260	0.30509199829012873	Direct		9		71		Direct
312	GO:0009144	GO:0009168	GO:0009144	GO:0009168	0.5405940594069959	Direct		9		45		Direct
1071	R-HSA-72766	ko03010	R-HSA-72766	ko03010	0.7676056338033078	Direct		155		10		Direct
313	R-HSA-2408557	R-HSA-72766	R-HSA-2408557	R-HSA-72766	0.6590909090916838	Direct		11		155		Direct
319	CORUM:306	R-HSA-72766	CORUM:306	R-HSA-72766	0.6756756756764271	Direct		12		155		Direct
1072	R-HSA-72766	hsa03010	R-HSA-72766	hsa03010	0.7676056338033078	Direct		155		13		Direct
333	R-HSA-1799339	R-HSA-72766	R-HSA-1799339	R-HSA-72766	0.776951672862951	Direct		14		155		Direct
1073	R-HSA-72766	R-HSA-9675108	R-HSA-72766	R-HSA-9675108	0.4230769230778742	Direct		155		15		Direct
343	R-HSA-72689	R-HSA-72766	R-HSA-72689	R-HSA-72766	0.7500000000005682	Direct		16		155		Direct
347	R-HSA-422475	R-HSA-72766	R-HSA-422475	R-HSA-72766	0.4317548746527601	Direct		17		155		Direct
352	R-HSA-2408522	R-HSA-72766	R-HSA-2408522	R-HSA-72766	0.6431226765807214	Direct		18		155		Direct
1151	GO:0042254	R-HSA-72766	GO:0042254	R-HSA-72766	0.3050193050209153	Direct		168		155		Direct
796	GO:0022613	R-HSA-72766	GO:0022613	R-HSA-72766	0.38732394366326595	Direct		87		155		Direct
314	R-HSA-2408557	ko03010	R-HSA-2408557	ko03010	0.7879341864722257	Direct		11		10		Direct
320	CORUM:306	ko03010	CORUM:306	ko03010	0.86431690580199	Direct		12		10		Direct
332	hsa03010	ko03010	hsa03010	ko03010	1.0	Direct		13		10		Direct
334	R-HSA-1799339	ko03010	R-HSA-1799339	ko03010	0.7668254913645112	Direct		14		10		Direct
341	R-HSA-9675108	ko03010	R-HSA-9675108	ko03010	0.49271137026330974	Direct		15		10		Direct
344	R-HSA-72689	ko03010	R-HSA-72689	ko03010	0.7879341864722257	Direct		16		10		Direct
348	R-HSA-422475	ko03010	R-HSA-422475	ko03010	0.5029623360144571	Direct		17		10		Direct
353	R-HSA-2408522	ko03010	R-HSA-2408522	ko03010	0.7668254913645112	Direct		18		10		Direct
1152	GO:0042254	ko03010	GO:0042254	ko03010	0.37585776668915444	Direct		168		10		Direct
797	GO:0022613	ko03010	GO:0022613	ko03010	0.3692136084789421	Direct		87		10		Direct
321	CORUM:306	R-HSA-2408557	CORUM:306	R-HSA-2408557	0.9097510373446698	Direct		12		11		Direct
315	R-HSA-2408557	hsa03010	R-HSA-2408557	hsa03010	0.7879341864722257	Direct		11		13		Direct
335	R-HSA-1799339	R-HSA-2408557	R-HSA-1799339	R-HSA-2408557	0.8572834645673364	Direct		14		11		Direct
316	R-HSA-2408557	R-HSA-9675108	R-HSA-2408557	R-HSA-9675108	0.5390728476830046	Direct		11		15		Direct
317	R-HSA-2408557	R-HSA-72689	R-HSA-2408557	R-HSA-72689	0.8828282828286259	Direct		11		16		Direct
318	R-HSA-2408557	R-HSA-422475	R-HSA-2408557	R-HSA-422475	0.5505390835588296	Direct		11		17		Direct
354	R-HSA-2408522	R-HSA-2408557	R-HSA-2408522	R-HSA-2408557	0.9714566929134673	Direct		18		11		Direct
1153	GO:0042254	R-HSA-2408557	GO:0042254	R-HSA-2408557	0.30809128630913535	Direct		168		11		Direct
798	GO:0022613	R-HSA-2408557	GO:0022613	R-HSA-2408557	0.3107861060347336	Direct		87		11		Direct
807	GO:0006364	R-HSA-2408557	GO:0006364	R-HSA-2408557	0.30455635491848543	Direct		88		11		Direct
815	GO:0016072	R-HSA-2408557	GO:0016072	R-HSA-2408557	0.30455635491848543	Direct		89		11		Direct
830	GO:0034660	R-HSA-2408557	GO:0034660	R-HSA-2408557	0.3198294243091396	Direct		93		11		Direct
322	CORUM:306	hsa03010	CORUM:306	hsa03010	0.86431690580199	Direct		12		13		Direct
323	CORUM:306	R-HSA-1799339	CORUM:306	R-HSA-1799339	0.8828480053866417	Direct		12		14		Direct
324	CORUM:306	R-HSA-9675108	CORUM:306	R-HSA-9675108	0.5515463917534515	Direct		12		15		Direct
325	CORUM:306	R-HSA-72689	CORUM:306	R-HSA-72689	0.9097510373446698	Direct		12		16		Direct
326	CORUM:306	R-HSA-422475	CORUM:306	R-HSA-422475	0.5633626097875666	Direct		12		17		Direct
327	CORUM:306	R-HSA-2408522	CORUM:306	R-HSA-2408522	0.8828480053866417	Direct		12		18		Direct
328	CORUM:306	GO:0042254	CORUM:306	GO:0042254	0.3197085480739003	Direct		12		168		Direct
329	CORUM:306	GO:0022613	CORUM:306	GO:0022613	0.3215845290099505	Direct		12		87		Direct
330	CORUM:306	GO:0006364	CORUM:306	GO:0006364	0.3172242874869646	Direct		12		88		Direct
331	CORUM:306	GO:0016072	CORUM:306	GO:0016072	0.3172242874869646	Direct		12		89		Direct
336	R-HSA-1799339	hsa03010	R-HSA-1799339	hsa03010	0.7668254913645112	Direct		14		13		Direct
342	R-HSA-9675108	hsa03010	R-HSA-9675108	hsa03010	0.49271137026330974	Direct		15		13		Direct
345	R-HSA-72689	hsa03010	R-HSA-72689	hsa03010	0.7879341864722257	Direct		16		13		Direct
349	R-HSA-422475	hsa03010	R-HSA-422475	hsa03010	0.5029623360144571	Direct		17		13		Direct
355	R-HSA-2408522	hsa03010	R-HSA-2408522	hsa03010	0.7668254913645112	Direct		18		13		Direct
1154	GO:0042254	hsa03010	GO:0042254	hsa03010	0.37585776668915444	Direct		168		13		Direct
799	GO:0022613	hsa03010	GO:0022613	hsa03010	0.3692136084789421	Direct		87		13		Direct
337	R-HSA-1799339	R-HSA-9675108	R-HSA-1799339	R-HSA-9675108	0.5269682470648357	Direct		14		15		Direct
338	R-HSA-1799339	R-HSA-72689	R-HSA-1799339	R-HSA-72689	0.8572834645673364	Direct		14		16		Direct
339	R-HSA-1799339	R-HSA-422475	R-HSA-1799339	R-HSA-422475	0.5381041920150463	Direct		14		17		Direct
340	R-HSA-1799339	R-HSA-2408522	R-HSA-1799339	R-HSA-2408522	0.832986722124925	Direct		14		18		Direct
800	GO:0022613	R-HSA-1799339	GO:0022613	R-HSA-1799339	0.3004764740935337	Direct		87		14		Direct
346	R-HSA-72689	R-HSA-9675108	R-HSA-72689	R-HSA-9675108	0.5390728476830046	Direct		16		15		Direct
350	R-HSA-422475	R-HSA-9675108	R-HSA-422475	R-HSA-9675108	0.9850566815527534	Direct		17		15		Direct
356	R-HSA-2408522	R-HSA-9675108	R-HSA-2408522	R-HSA-9675108	0.5269682470648357	Direct		18		15		Direct
351	R-HSA-422475	R-HSA-72689	R-HSA-422475	R-HSA-72689	0.5505390835588296	Direct		17		16		Direct
357	R-HSA-2408522	R-HSA-72689	R-HSA-2408522	R-HSA-72689	0.8572834645673364	Direct		18		16		Direct
1155	GO:0042254	R-HSA-72689	GO:0042254	R-HSA-72689	0.30809128630913535	Direct		168		16		Direct
801	GO:0022613	R-HSA-72689	GO:0022613	R-HSA-72689	0.41681901279862077	Direct		87		16		Direct
808	GO:0006364	R-HSA-72689	GO:0006364	R-HSA-72689	0.30455635491848543	Direct		88		16		Direct
816	GO:0016072	R-HSA-72689	GO:0016072	R-HSA-72689	0.30455635491848543	Direct		89		16		Direct
358	R-HSA-2408522	R-HSA-422475	R-HSA-2408522	R-HSA-422475	0.5381041920150463	Direct		18		17		Direct
802	GO:0022613	R-HSA-2408522	GO:0022613	R-HSA-2408522	0.3004764740935337	Direct		87		18		Direct
831	GO:0034660	R-HSA-2408522	GO:0034660	R-HSA-2408522	0.30833045281922444	Direct		93		18		Direct
359	GO:0000302	GO:0006979	GO:0000302	GO:0006979	0.7977626035164198	Direct		19		167		Direct
1136	GO:0006979	GO:0034599	GO:0006979	GO:0034599	0.8267918088741486	Direct		167		20		Direct
1137	GO:0006979	GO:0097237	GO:0006979	GO:0097237	0.7157707157714503	Direct		167		21		Direct
1138	GO:0006979	GO:0009636	GO:0006979	GO:0009636	0.6578395385429934	Direct		167		22		Direct
1139	GO:0006979	GO:0034614	GO:0006979	GO:0034614	0.6314760508319343	Direct		167		23		Direct
1140	GO:0006979	WP408	GO:0006979	WP408	0.36956521739339565	Direct		167		152		Direct
1141	GO:0006979	GO:0046677	GO:0006979	GO:0046677	0.47152619590116884	Direct		167		24		Direct
1142	GO:0006979	GO:0042542	GO:0006979	GO:0042542	0.5108065366382905	Direct		167		25		Direct
1143	GO:0006979	GO:0098869	GO:0006979	GO:0098869	0.40346445326784164	Direct		167		121		Direct
1144	GO:0006979	R-HSA-3299685	GO:0006979	R-HSA-3299685	0.31697742885414876	Direct		167		122		Direct
1145	GO:0006979	GO:0071236	GO:0006979	GO:0071236	0.3885081707978631	Direct		167		26		Direct
1146	GO:0006979	GO:0070301	GO:0006979	GO:0070301	0.41924717226221087	Direct		167		27		Direct
1147	GO:0006979	GO:1990748	GO:0006979	GO:1990748	0.40346445326784164	Direct		167		123		Direct
1148	GO:0006979	GO:0098754	GO:0006979	GO:0098754	0.40346445326784164	Direct		167		124		Direct
1149	GO:0006979	GO:0043534	GO:0006979	GO:0043534	0.3273589878776494	Direct		167		104		Direct
901	GO:0001944	GO:0006979	GO:0001944	GO:0006979	0.3485760128374561	Direct		111		167		Direct
1150	GO:0006979	GO:0072358	GO:0006979	GO:0072358	0.3485760128374561	Direct		167		112		Direct
1074	GO:0016049	GO:0045664	GO:0016049	GO:0045664	0.35822959889478667	Direct		157		165		Direct
414	GO:0010975	GO:0045664	GO:0010975	GO:0045664	0.8796680497927725	Direct		28		165		Direct
1125	GO:0045664	GO:0051129	GO:0045664	GO:0051129	0.3351920693940071	Direct		165		162		Direct
600	GO:0001558	GO:0045664	GO:0001558	GO:0045664	0.3457059679780909	Direct		55		165		Direct
1126	GO:0045664	GO:0048858	GO:0045664	GO:0048858	0.7134387351784132	Direct		165		29		Direct
439	GO:0032990	GO:0045664	GO:0032990	GO:0045664	0.7134387351784132	Direct		30		165		Direct
1087	GO:0021700	GO:0045664	GO:0021700	GO:0045664	0.3062200956953843	Direct		159		165		Direct
1127	GO:0045664	GO:0048812	GO:0045664	GO:0048812	0.7282463186082919	Direct		165		31		Direct
1128	GO:0045664	GO:0120039	GO:0045664	GO:0120039	0.7282463186082919	Direct		165		32		Direct
1129	GO:0045664	GO:0120035	GO:0045664	GO:0120035	0.8280632411070479	Direct		165		33		Direct
455	GO:0031344	GO:0045664	GO:0031344	GO:0045664	0.8280632411070479	Direct		34		165		Direct
471	GO:0022604	GO:0045664	GO:0022604	GO:0045664	0.6834061135377859	Direct		35		165		Direct
615	GO:0040008	GO:0045664	GO:0040008	GO:0045664	0.3181189488257109	Direct		56		165		Direct
1130	GO:0045664	GO:0045666	GO:0045664	GO:0045666	0.705007824726804	Direct		165		36		Direct
1131	GO:0045664	GO:0051961	GO:0045664	GO:0051961	0.47097844112896714	Direct		165		61		Direct
1132	GO:0045664	GO:0060322	GO:0045664	GO:0060322	0.3095238095251715	Direct		165		62		Direct
1133	GO:0045664	GO:0045665	GO:0045664	GO:0045665	0.5141093474439236	Direct		165		63		Direct
1134	GO:0045664	GO:0050768	GO:0045664	GO:0050768	0.49913644214287756	Direct		165		64		Direct
650	GO:0045596	GO:0045664	GO:0045596	GO:0045664	0.5021459227478137	Direct		65		165		Direct
656	GO:0007420	GO:0045664	GO:0007420	GO:0045664	0.30349344978312903	Direct		66		165		Direct
663	GO:0010977	GO:0045664	GO:0010977	GO:0045664	0.399246704333091	Direct		67		165		Direct
683	GO:0031345	GO:0045664	GO:0031345	GO:0045664	0.38581952118027707	Direct		68		165		Direct
697	GO:0010721	GO:0045664	GO:0010721	GO:0045664	0.49913644214287756	Direct		69		165		Direct
360	GO:0000302	GO:0034599	GO:0000302	GO:0034599	0.8495850622411163	Direct		19		20		Direct
361	GO:0000302	GO:0097237	GO:0000302	GO:0097237	0.7137111517376566	Direct		19		21		Direct
362	GO:0000302	GO:0009636	GO:0000302	GO:0009636	0.6472239550851742	Direct		19		22		Direct
363	GO:0000302	GO:0034614	GO:0000302	GO:0034614	0.8203221809176222	Direct		19		23		Direct
364	GO:0000302	GO:0046677	GO:0000302	GO:0046677	0.6070016939595029	Direct		19		24		Direct
365	GO:0000302	GO:0042542	GO:0000302	GO:0042542	0.6815374056292708	Direct		19		25		Direct
366	GO:0000302	GO:0071236	GO:0000302	GO:0071236	0.5223061084439062	Direct		19		26		Direct
367	GO:0000302	GO:0070301	GO:0000302	GO:0070301	0.5711116588630666	Direct		19		27		Direct
1102	GO:0098662	GO:1902600	GO:0098662	GO:1902600	0.5854949708850203	Direct		160		37		Direct
1103	GO:0098662	hsa04260	GO:0098662	hsa04260	0.35260446479840646	Direct		160		70		Direct
513	GO:0015672	GO:0098662	GO:0015672	GO:0098662	0.8061497326206967	Direct		40		160		Direct
1104	GO:0098662	ko04260	GO:0098662	ko04260	0.36459246275358725	Direct		160		71		Direct
493	GO:1902600	R-HSA-1852241	GO:1902600	R-HSA-1852241	0.3327246165105208	Direct		37		151		Direct
501	R-HSA-163210	R-HSA-1852241	R-HSA-163210	R-HSA-1852241	0.4660056657245736	Direct		38		151		Direct
504	GO:0042776	R-HSA-1852241	GO:0042776	R-HSA-1852241	0.4660056657245736	Direct		39		151		Direct
526	GO:1990542	R-HSA-1852241	GO:1990542	R-HSA-1852241	0.37497505488143534	Direct		41		151		Direct
530	GO:0007007	R-HSA-1852241	GO:0007007	R-HSA-1852241	0.42586889573470943	Direct		42		151		Direct
541	GO:0015985	R-HSA-1852241	GO:0015985	R-HSA-1852241	0.4660056657245736	Direct		43		151		Direct
549	GO:0015986	R-HSA-1852241	GO:0015986	R-HSA-1852241	0.4660056657245736	Direct		44		151		Direct
1057	R-HSA-1852241	R-HSA-389957	R-HSA-1852241	R-HSA-389957	0.3838526912206618	Direct		151		46		Direct
557	GO:0009168	R-HSA-1852241	GO:0009168	R-HSA-1852241	0.41138883668675846	Direct		45		151		Direct
1058	R-HSA-1852241	R-HSA-389958	R-HSA-1852241	R-HSA-389958	0.3838526912206618	Direct		151		47		Direct
1059	R-HSA-1852241	R-HSA-389960	R-HSA-1852241	R-HSA-389960	0.40308747856172195	Direct		151		48		Direct
1060	R-HSA-1852241	R-HSA-391251	R-HSA-1852241	R-HSA-391251	0.3493180818326707	Direct		151		49		Direct
1061	R-HSA-1852241	R-HSA-9646399	R-HSA-1852241	R-HSA-9646399	0.3178142612133965	Direct		151		54		Direct
494	GO:1902600	R-HSA-163210	GO:1902600	R-HSA-163210	0.5901060070692381	Direct		37		38		Direct
495	GO:1902600	R-HSA-5628897	GO:1902600	R-HSA-5628897	0.31020812686124954	Direct		37		154		Direct
505	GO:0042776	GO:1902600	GO:0042776	GO:1902600	0.5901060070692381	Direct		39		37		Direct
496	GO:1902600	hsa04260	GO:1902600	hsa04260	0.4826560951459372	Direct		37		70		Direct
514	GO:0015672	GO:1902600	GO:0015672	GO:1902600	0.7227533460810747	Direct		40		37		Direct
497	GO:1902600	GO:1990542	GO:1902600	GO:1990542	0.46091515729489535	Direct		37		41		Direct
531	GO:0007007	GO:1902600	GO:0007007	GO:1902600	0.531754574813818	Direct		42		37		Direct
498	GO:1902600	ko04260	GO:1902600	ko04260	0.5061919504666132	Direct		37		71		Direct
542	GO:0015985	GO:1902600	GO:0015985	GO:1902600	0.5901060070692381	Direct		43		37		Direct
550	GO:0015986	GO:1902600	GO:0015986	GO:1902600	0.5901060070692381	Direct		44		37		Direct
558	GO:0009168	GO:1902600	GO:0009168	GO:1902600	0.42205491585696575	Direct		45		37		Direct
499	GO:1902600	WP4922	GO:1902600	WP4922	0.48763250883654763	Direct		37		73		Direct
730	GO:0006123	GO:1902600	GO:0006123	GO:1902600	0.516069221263418	Direct		74		37		Direct
742	GO:0019646	GO:1902600	GO:0019646	GO:1902600	0.516069221263418	Direct		75		37		Direct
754	GO:0009060	GO:1902600	GO:0009060	GO:1902600	0.5596175478086792	Direct		77		37		Direct
415	GO:0010975	GO:0016049	GO:0010975	GO:0016049	0.37345679012485855	Direct		28		157		Direct
601	GO:0001558	GO:0016049	GO:0001558	GO:0016049	0.9287469287470981	Direct		55		157		Direct
1075	GO:0016049	GO:0048858	GO:0016049	GO:0048858	0.3865791393156666	Direct		157		29		Direct
1076	GO:0016049	GO:0032990	GO:0016049	GO:0032990	0.3865791393156666	Direct		157		30		Direct
1077	GO:0016049	GO:0048812	GO:0016049	GO:0048812	0.3967310549790112	Direct		157		31		Direct
1078	GO:0016049	GO:0120039	GO:0016049	GO:0120039	0.3967310549790112	Direct		157		32		Direct
1079	GO:0016049	GO:0120035	GO:0016049	GO:0120035	0.3442742523719195	Direct		157		33		Direct
1080	GO:0016049	GO:0031344	GO:0016049	GO:0031344	0.3442742523719195	Direct		157		34		Direct
1081	GO:0016049	GO:0022604	GO:0016049	GO:0022604	0.35872235872388214	Direct		157		35		Direct
1082	GO:0016049	GO:0040008	GO:0016049	GO:0040008	0.8657407407410411	Direct		157		56		Direct
1083	GO:0016049	GO:0030307	GO:0016049	GO:0030307	0.5708245243142124	Direct		157		57		Direct
1084	GO:0016049	GO:0030308	GO:0016049	GO:0030308	0.5708245243142124	Direct		157		58		Direct
1085	GO:0016049	GO:0045926	GO:0016049	GO:0045926	0.5520082389302771	Direct		157		59		Direct
1086	GO:0016049	GO:0045927	GO:0016049	GO:0045927	0.5520082389302771	Direct		157		60		Direct
506	GO:0042776	R-HSA-163210	GO:0042776	R-HSA-163210	1.0	Direct		39		38		Direct
515	GO:0015672	R-HSA-163210	GO:0015672	R-HSA-163210	0.38297872340637007	Direct		40		38		Direct
527	GO:1990542	R-HSA-163210	GO:1990542	R-HSA-163210	0.6991701244831383	Direct		41		38		Direct
532	GO:0007007	R-HSA-163210	GO:0007007	R-HSA-163210	0.8542713567849813	Direct		42		38		Direct
543	GO:0015985	R-HSA-163210	GO:0015985	R-HSA-163210	1.0	Direct		43		38		Direct
551	GO:0015986	R-HSA-163210	GO:0015986	R-HSA-163210	1.0	Direct		44		38		Direct
559	GO:0009168	R-HSA-163210	GO:0009168	R-HSA-163210	0.6226765799276848	Direct		45		38		Direct
416	GO:0010975	GO:0051129	GO:0010975	GO:0051129	0.34942216179597996	Direct		28		162		Direct
602	GO:0001558	GO:0010975	GO:0001558	GO:0010975	0.4062244062258168	Direct		55		28		Direct
417	GO:0010975	GO:0048858	GO:0010975	GO:0048858	0.7250182348656437	Direct		28		29		Direct
418	GO:0010975	GO:0032990	GO:0010975	GO:0032990	0.7250182348656437	Direct		28		30		Direct
419	GO:0010975	GO:0021700	GO:0010975	GO:0021700	0.3120437956222584	Direct		28		159		Direct
420	GO:0010975	GO:0048812	GO:0010975	GO:0048812	0.7414561664195762	Direct		28		31		Direct
421	GO:0010975	GO:0120039	GO:0010975	GO:0120039	0.7414561664195762	Direct		28		32		Direct
422	GO:0010975	GO:0120035	GO:0010975	GO:0120035	0.9365426695843793	Direct		28		33		Direct
423	GO:0010975	GO:0031344	GO:0010975	GO:0031344	0.9365426695843793	Direct		28		34		Direct
424	GO:0010975	GO:0022604	GO:0010975	GO:0022604	0.7862407862412941	Direct		28		35		Direct
425	GO:0010975	GO:0040008	GO:0010975	GO:0040008	0.37345679012485855	Direct		28		56		Direct
426	GO:0010975	GO:0045666	GO:0010975	GO:0045666	0.6636931311337868	Direct		28		36		Direct
427	GO:0010975	GO:0051961	GO:0010975	GO:0051961	0.39005736137836433	Direct		28		61		Direct
428	GO:0010975	GO:0030307	GO:0010975	GO:0030307	0.3255813953509052	Direct		28		57		Direct
429	GO:0010975	GO:0045665	GO:0010975	GO:0045665	0.43254376931168437	Direct		28		63		Direct
430	GO:0010975	GO:0050768	GO:0010975	GO:0050768	0.4176706827326196	Direct		28		64		Direct
431	GO:0010975	GO:0045596	GO:0010975	GO:0045596	0.34831460674308967	Direct		28		65		Direct
432	GO:0010975	GO:0045927	GO:0010975	GO:0045927	0.3130792996930916	Direct		28		60		Direct
433	GO:0010975	GO:0010977	GO:0010975	GO:0010977	0.48214285714453287	Direct		28		67		Direct
434	GO:0010975	GO:0031345	GO:0010975	GO:0031345	0.4647122692742154	Direct		28		68		Direct
698	GO:0010721	GO:0010975	GO:0010721	GO:0010975	0.4176706827326196	Direct		69		28		Direct
1113	GO:0051129	GO:0120035	GO:0051129	GO:0120035	0.36077795786181743	Direct		162		33		Direct
456	GO:0031344	GO:0051129	GO:0031344	GO:0051129	0.36077795786181743	Direct		34		162		Direct
1114	GO:0051129	GO:0051961	GO:0051129	GO:0051961	0.4118442401311838	Direct		162		61		Direct
1115	GO:0051129	GO:0060322	GO:0051129	GO:0060322	0.34039469283214135	Direct		162		62		Direct
633	GO:0045665	GO:0051129	GO:0045665	GO:0051129	0.4006028419707811	Direct		63		162		Direct
643	GO:0050768	GO:0051129	GO:0050768	GO:0051129	0.38818565400993643	Direct		64		162		Direct
651	GO:0045596	GO:0051129	GO:0045596	GO:0051129	0.32763466042291556	Direct		65		162		Direct
664	GO:0010977	GO:0051129	GO:0010977	GO:0051129	0.38788620373365684	Direct		67		162		Direct
684	GO:0031345	GO:0051129	GO:0031345	GO:0051129	0.42703188145636384	Direct		68		162		Direct
699	GO:0010721	GO:0051129	GO:0010721	GO:0051129	0.38818565400993643	Direct		69		162		Direct
368	GO:0034599	GO:0097237	GO:0034599	GO:0097237	0.7526652452033233	Direct		20		21		Direct
386	GO:0009636	GO:0034599	GO:0009636	GO:0034599	0.6819012797083385	Direct		22		20		Direct
369	GO:0034599	GO:0034614	GO:0034599	GO:0034614	0.7913669064755456	Direct		20		23		Direct
370	GO:0034599	WP408	GO:0034599	WP408	0.315634218292012	Direct		20		152		Direct
371	GO:0034599	GO:0046677	GO:0034599	GO:0046677	0.5230263157909901	Direct		20		24		Direct
372	GO:0034599	GO:0042542	GO:0034599	GO:0042542	0.578042328043947	Direct		20		25		Direct
373	GO:0034599	GO:0098869	GO:0034599	GO:0098869	0.36438356164636027	Direct		20		121		Direct
374	GO:0034599	R-HSA-3299685	GO:0034599	R-HSA-3299685	0.332822085892538	Direct		20		122		Direct
375	GO:0034599	GO:0071236	GO:0034599	GO:0071236	0.5013227513246645	Direct		20		26		Direct
376	GO:0034599	GO:0070301	GO:0034599	GO:0070301	0.5468750000018667	Direct		20		27		Direct
377	GO:0034599	GO:1990748	GO:0034599	GO:1990748	0.36438356164636027	Direct		20		123		Direct
378	GO:0034599	GO:0098754	GO:0034599	GO:0098754	0.36438356164636027	Direct		20		124		Direct
379	GO:0034599	ko00480	GO:0034599	ko00480	0.35143769968351635	Direct		20		126		Direct
603	GO:0001558	GO:0048858	GO:0001558	GO:0048858	0.3294797687876258	Direct		55		29		Direct
604	GO:0001558	GO:0032990	GO:0001558	GO:0032990	0.3294797687876258	Direct		55		30		Direct
605	GO:0001558	GO:0048812	GO:0001558	GO:0048812	0.33883647798892913	Direct		55		31		Direct
606	GO:0001558	GO:0120039	GO:0001558	GO:0120039	0.33883647798892913	Direct		55		32		Direct
607	GO:0001558	GO:0120035	GO:0001558	GO:0120035	0.37418111753511735	Direct		55		33		Direct
608	GO:0001558	GO:0031344	GO:0001558	GO:0031344	0.37418111753511735	Direct		55		34		Direct
609	GO:0001558	GO:0022604	GO:0001558	GO:0022604	0.3918741808665473	Direct		55		35		Direct
610	GO:0001558	GO:0040008	GO:0001558	GO:0040008	0.9287469287470981	Direct		55		56		Direct
611	GO:0001558	GO:0030307	GO:0001558	GO:0030307	0.6307870370382764	Direct		55		57		Direct
612	GO:0001558	GO:0030308	GO:0001558	GO:0030308	0.6307870370382764	Direct		55		58		Direct
613	GO:0001558	GO:0045926	GO:0001558	GO:0045926	0.6087689713334844	Direct		55		59		Direct
614	GO:0001558	GO:0045927	GO:0001558	GO:0045927	0.6087689713334844	Direct		55		60		Direct
1068	R-HSA-5628897	hsa04260	R-HSA-5628897	hsa04260	0.38224852071324	Direct		154		70		Direct
1069	R-HSA-5628897	ko04260	R-HSA-5628897	ko04260	0.40485074627187667	Direct		154		71		Direct
722	R-HSA-3700989	R-HSA-5628897	R-HSA-3700989	R-HSA-5628897	0.7033248081852433	Direct		72		154		Direct
1070	R-HSA-5628897	WP4922	R-HSA-5628897	WP4922	0.6167400881081745	Direct		154		73		Direct
731	GO:0006123	R-HSA-5628897	GO:0006123	R-HSA-5628897	0.5242187500032341	Direct		74		154		Direct
743	GO:0019646	R-HSA-5628897	GO:0019646	R-HSA-5628897	0.5242187500032341	Direct		75		154		Direct
755	GO:0009060	R-HSA-5628897	GO:0009060	R-HSA-5628897	0.45775623269024773	Direct		77		154		Direct
387	GO:0009636	GO:0097237	GO:0009636	GO:0097237	0.8332268370611662	Direct		22		21		Direct
397	GO:0034614	GO:0097237	GO:0034614	GO:0097237	0.5538461538478122	Direct		23		21		Direct
928	GO:0045454	GO:0097237	GO:0045454	GO:0097237	0.3472668810319819	Direct		119		21		Direct
402	GO:0046677	GO:0097237	GO:0046677	GO:0097237	0.6286379511071912	Direct		24		21		Direct
380	GO:0097237	WP15	GO:0097237	WP15	0.4841897233223758	Direct		21		120		Direct
405	GO:0042542	GO:0097237	GO:0042542	GO:0097237	0.7104136947230237	Direct		25		21		Direct
381	GO:0097237	GO:0098869	GO:0097237	GO:0098869	0.6561264822149172	Direct		21		121		Direct
382	GO:0097237	R-HSA-3299685	GO:0097237	R-HSA-3299685	0.36709569110548845	Direct		21		122		Direct
411	GO:0071236	GO:0097237	GO:0071236	GO:0097237	0.544935805993323	Direct		26		21		Direct
412	GO:0070301	GO:0097237	GO:0070301	GO:0097237	0.5974293059143972	Direct		27		21		Direct
383	GO:0097237	GO:1990748	GO:0097237	GO:1990748	0.6561264822149172	Direct		21		123		Direct
384	GO:0097237	GO:0098754	GO:0097237	GO:0098754	0.6561264822149172	Direct		21		124		Direct
385	GO:0097237	ko00480	GO:0097237	ko00480	0.388758782204519	Direct		21		126		Direct
962	GO:0042744	GO:0097237	GO:0042744	GO:0097237	0.30570902394477595	Direct		127		21		Direct
516	GO:0015672	GO:0042776	GO:0015672	GO:0042776	0.38297872340637007	Direct		40		39		Direct
507	GO:0042776	GO:1990542	GO:0042776	GO:1990542	0.6991701244831383	Direct		39		41		Direct
533	GO:0007007	GO:0042776	GO:0007007	GO:0042776	0.8542713567849813	Direct		42		39		Direct
544	GO:0015985	GO:0042776	GO:0015985	GO:0042776	1.0	Direct		43		39		Direct
552	GO:0015986	GO:0042776	GO:0015986	GO:0042776	1.0	Direct		44		39		Direct
560	GO:0009168	GO:0042776	GO:0009168	GO:0042776	0.6226765799276848	Direct		45		39		Direct
517	GO:0015672	hsa04260	GO:0015672	hsa04260	0.386892177591732	Direct		40		70		Direct
720	hsa04260	ko04260	hsa04260	ko04260	0.9458955223883524	Direct		70		71		Direct
725	WP4922	hsa04260	WP4922	hsa04260	0.6167400881081745	Direct		73		70		Direct
732	GO:0006123	hsa04260	GO:0006123	hsa04260	0.6601562500023102	Direct		74		70		Direct
744	GO:0019646	hsa04260	GO:0019646	hsa04260	0.6601562500023102	Direct		75		70		Direct
756	GO:0009060	hsa04260	GO:0009060	hsa04260	0.5782548476479705	Direct		77		70		Direct
518	GO:0015672	GO:1990542	GO:0015672	GO:1990542	0.3130792996930916	Direct		40		41		Direct
534	GO:0007007	GO:0015672	GO:0007007	GO:0015672	0.35267857143066605	Direct		42		40		Direct
519	GO:0015672	ko04260	GO:0015672	ko04260	0.40173724213000545	Direct		40		71		Direct
520	GO:0015672	GO:0015985	GO:0015672	GO:0015985	0.38297872340637007	Direct		40		43		Direct
521	GO:0015672	GO:0015986	GO:0015672	GO:0015986	0.38297872340637007	Direct		40		44		Direct
522	GO:0015672	WP4922	GO:0015672	WP4922	0.3144208037848556	Direct		40		73		Direct
733	GO:0006123	GO:0015672	GO:0006123	GO:0015672	0.3288672350815427	Direct		74		40		Direct
523	GO:0015672	GO:0019646	GO:0015672	GO:0019646	0.3288672350815427	Direct		40		75		Direct
757	GO:0009060	GO:0015672	GO:0009060	GO:0015672	0.3673938002317276	Direct		77		40		Direct
440	GO:0032990	GO:0048858	GO:0032990	GO:0048858	1.0	Direct		30		29		Direct
1088	GO:0021700	GO:0048858	GO:0021700	GO:0048858	0.3336170212782405	Direct		159		29		Direct
449	GO:0048812	GO:0048858	GO:0048812	GO:0048858	0.979577464788774	Direct		31		29		Direct
435	GO:0048858	GO:0120039	GO:0048858	GO:0120039	0.979577464788774	Direct		29		32		Direct
436	GO:0048858	GO:0120035	GO:0048858	GO:0120035	0.6787815853242863	Direct		29		33		Direct
457	GO:0031344	GO:0048858	GO:0031344	GO:0048858	0.6787815853242863	Direct		34		29		Direct
472	GO:0022604	GO:0048858	GO:0022604	GO:0048858	0.7317919075150503	Direct		35		29		Direct
616	GO:0040008	GO:0048858	GO:0040008	GO:0048858	0.30196936542817243	Direct		56		29		Direct
484	GO:0045666	GO:0048858	GO:0045666	GO:0048858	0.5648186744487389	Direct		36		29		Direct
437	GO:0048858	GO:0051961	GO:0048858	GO:0051961	0.35612788632492676	Direct		29		61		Direct
634	GO:0045665	GO:0048858	GO:0045665	GO:0048858	0.33871733966928064	Direct		63		29		Direct
438	GO:0048858	GO:0050768	GO:0048858	GO:0050768	0.32683379758769887	Direct		29		64		Direct
665	GO:0010977	GO:0048858	GO:0010977	GO:0048858	0.3186925434136627	Direct		67		29		Direct
685	GO:0031345	GO:0048858	GO:0031345	GO:0048858	0.3064275037389256	Direct		68		29		Direct
700	GO:0010721	GO:0048858	GO:0010721	GO:0048858	0.32683379758769887	Direct		69		29		Direct
535	GO:0007007	GO:1990542	GO:0007007	GO:1990542	0.8377874456192735	Direct		42		41		Direct
545	GO:0015985	GO:1990542	GO:0015985	GO:1990542	0.6991701244831383	Direct		43		41		Direct
553	GO:0015986	GO:1990542	GO:0015986	GO:1990542	0.6991701244831383	Direct		44		41		Direct
561	GO:0009168	GO:1990542	GO:0009168	GO:1990542	0.48227126209000964	Direct		45		41		Direct
536	GO:0007007	GO:0015985	GO:0007007	GO:0015985	0.8542713567849813	Direct		42		43		Direct
537	GO:0007007	GO:0015986	GO:0007007	GO:0015986	0.8542713567849813	Direct		42		44		Direct
538	GO:0007007	GO:0009168	GO:0007007	GO:0009168	0.5588732394387819	Direct		42		45		Direct
1135	GO:0031647	GO:0050821	GO:0031647	GO:0050821	0.8607721544313709	Direct		166		78		Direct
1089	GO:0021700	GO:0032990	GO:0021700	GO:0032990	0.3336170212782405	Direct		159		30		Direct
441	GO:0032990	GO:0048812	GO:0032990	GO:0048812	0.979577464788774	Direct		30		31		Direct
442	GO:0032990	GO:0120039	GO:0032990	GO:0120039	0.979577464788774	Direct		30		32		Direct
443	GO:0032990	GO:0120035	GO:0032990	GO:0120035	0.6787815853242863	Direct		30		33		Direct
458	GO:0031344	GO:0032990	GO:0031344	GO:0032990	0.6787815853242863	Direct		34		30		Direct
473	GO:0022604	GO:0032990	GO:0022604	GO:0032990	0.7317919075150503	Direct		35		30		Direct
444	GO:0032990	GO:0040008	GO:0032990	GO:0040008	0.30196936542817243	Direct		30		56		Direct
445	GO:0032990	GO:0045666	GO:0032990	GO:0045666	0.5648186744487389	Direct		30		36		Direct
446	GO:0032990	GO:0051961	GO:0032990	GO:0051961	0.35612788632492676	Direct		30		61		Direct
447	GO:0032990	GO:0045665	GO:0032990	GO:0045665	0.33871733966928064	Direct		30		63		Direct
448	GO:0032990	GO:0050768	GO:0032990	GO:0050768	0.32683379758769887	Direct		30		64		Direct
666	GO:0010977	GO:0032990	GO:0010977	GO:0032990	0.3186925434136627	Direct		67		30		Direct
686	GO:0031345	GO:0032990	GO:0031345	GO:0032990	0.3064275037389256	Direct		68		30		Direct
701	GO:0010721	GO:0032990	GO:0010721	GO:0032990	0.32683379758769887	Direct		69		30		Direct
1090	GO:0021700	GO:0048812	GO:0021700	GO:0048812	0.3435867672680528	Direct		159		31		Direct
1091	GO:0021700	GO:0120039	GO:0021700	GO:0120039	0.3435867672680528	Direct		159		32		Direct
1092	GO:0021700	GO:0022604	GO:0021700	GO:0022604	0.34414945919557743	Direct		159		35		Direct
1093	GO:0021700	GO:0048755	GO:0021700	GO:0048755	0.388758782204519	Direct		159		79		Direct
1094	GO:0021700	GO:0045666	GO:0021700	GO:0045666	0.3319926873878654	Direct		159		36		Direct
1095	GO:0021700	GO:2000172	GO:0021700	GO:2000172	0.30570902394477595	Direct		159		80		Direct
1096	GO:0021700	GO:0071695	GO:0021700	GO:0071695	0.7104136947230237	Direct		159		81		Direct
768	GO:0014041	GO:0021700	GO:0014041	GO:0021700	0.30570902394477595	Direct		82		159		Direct
775	GO:0001763	GO:0021700	GO:0001763	GO:0021700	0.3620531622390239	Direct		83		159		Direct
1097	GO:0021700	GO:1903429	GO:0021700	GO:1903429	0.30570902394477595	Direct		159		85		Direct
726	WP4922	ko04260	WP4922	ko04260	0.6596244131478567	Direct		73		71		Direct
734	GO:0006123	ko04260	GO:0006123	ko04260	0.708908406526585	Direct		74		71		Direct
745	GO:0019646	ko04260	GO:0019646	ko04260	0.708908406526585	Direct		75		71		Direct
749	WP678	ko04260	WP678	ko04260	0.32459970888488815	Direct		76		71		Direct
758	GO:0009060	ko04260	GO:0009060	ko04260	0.6163175303221883	Direct		77		71		Direct
450	GO:0048812	GO:0120039	GO:0048812	GO:0120039	1.0	Direct		31		32		Direct
451	GO:0048812	GO:0120035	GO:0048812	GO:0120035	0.6936619718316115	Direct		31		33		Direct
459	GO:0031344	GO:0048812	GO:0031344	GO:0048812	0.6936619718316115	Direct		34		31		Direct
474	GO:0022604	GO:0048812	GO:0022604	GO:0048812	0.7492138364785593	Direct		35		31		Direct
617	GO:0040008	GO:0048812	GO:0040008	GO:0048812	0.31054977711887	Direct		56		31		Direct
485	GO:0045666	GO:0048812	GO:0045666	GO:0048812	0.5798295454555836	Direct		36		31		Direct
452	GO:0048812	GO:0051961	GO:0048812	GO:0051961	0.3668890236523678	Direct		31		61		Direct
635	GO:0045665	GO:0048812	GO:0045665	GO:0048812	0.34947984395502596	Direct		63		31		Direct
453	GO:0048812	GO:0050768	GO:0048812	GO:0050768	0.33714285714468767	Direct		31		64		Direct
667	GO:0010977	GO:0048812	GO:0010977	GO:0048812	0.3293622985304254	Direct		67		31		Direct
687	GO:0031345	GO:0048812	GO:0031345	GO:0048812	0.31659836065776786	Direct		68		31		Direct
702	GO:0010721	GO:0048812	GO:0010721	GO:0048812	0.33714285714468767	Direct		69		31		Direct
546	GO:0015985	GO:0015986	GO:0015985	GO:0015986	1.0	Direct		43		44		Direct
562	GO:0009168	GO:0015985	GO:0009168	GO:0015985	0.6226765799276848	Direct		45		43		Direct
563	GO:0009168	GO:0015986	GO:0009168	GO:0015986	0.6226765799276848	Direct		45		44		Direct
803	GO:0022613	GO:0042254	GO:0022613	GO:0042254	0.86431690580199	Direct		87		168		Direct
809	GO:0006364	GO:0042254	GO:0006364	GO:0042254	0.8203221809176222	Direct		88		168		Direct
817	GO:0016072	GO:0042254	GO:0016072	GO:0042254	0.8203221809176222	Direct		89		168		Direct
1156	GO:0042254	GO:0042273	GO:0042254	GO:0042273	0.5092307692329584	Direct		168		90		Direct
822	GO:0034470	GO:0042254	GO:0034470	GO:0042254	0.7637703646245366	Direct		91		168		Direct
832	GO:0034660	GO:0042254	GO:0034660	GO:0042254	0.7137111517376566	Direct		93		168		Direct
834	CORUM:2904	CORUM:2920	CORUM:2904	CORUM:2920	0.7472766884563519	Direct		94		153		Direct
837	CORUM:2905	CORUM:2920	CORUM:2905	CORUM:2920	0.7472766884563519	Direct		95		153		Direct
1067	CORUM:2920	CORUM:2948	CORUM:2920	CORUM:2948	0.49455337691270373	Direct		153		96		Direct
564	R-HSA-389957	R-HSA-389958	R-HSA-389957	R-HSA-389958	1.0	Direct		46		47		Direct
565	R-HSA-389957	R-HSA-389960	R-HSA-389957	R-HSA-389960	0.9076433121027639	Direct		46		48		Direct
566	R-HSA-389957	R-HSA-391251	R-HSA-389957	R-HSA-391251	0.8542713567849813	Direct		46		49		Direct
567	R-HSA-389957	WP2272	R-HSA-389957	WP2272	0.4912280701797532	Direct		46		50		Direct
568	R-HSA-389957	ko05130	R-HSA-389957	ko05130	0.4912280701797532	Direct		46		51		Direct
569	R-HSA-389957	hsa05130	R-HSA-389957	hsa05130	0.4912280701797532	Direct		46		52		Direct
570	R-HSA-389957	R-HSA-389977	R-HSA-389957	R-HSA-389977	0.5944055944097081	Direct		46		53		Direct
571	R-HSA-389957	R-HSA-9646399	R-HSA-389957	R-HSA-9646399	0.5382165605138197	Direct		46		54		Direct
839	GO:0002088	GO:0007423	GO:0002088	GO:0007423	0.49904030710340097	Direct		97		169		Direct
845	GO:0001654	GO:0007423	GO:0001654	GO:0007423	0.8102212527272206	Direct		98		169		Direct
1157	GO:0007423	GO:0150063	GO:0007423	GO:0150063	0.8102212527272206	Direct		169		99		Direct
1158	GO:0007423	GO:0048880	GO:0007423	GO:0048880	0.8102212527272206	Direct		169		100		Direct
1159	GO:0007423	GO:0007601	GO:0007423	GO:0007601	0.3240331979536925	Direct		169		101		Direct
1160	GO:0007423	GO:0050953	GO:0007423	GO:0050953	0.3240331979536925	Direct		169		102		Direct
1161	GO:0007423	GO:0043010	GO:0007423	GO:0043010	0.7082984073772132	Direct		169		103		Direct
454	GO:0120035	GO:0120039	GO:0120035	GO:0120039	0.6936619718316115	Direct		33		32		Direct
460	GO:0031344	GO:0120039	GO:0031344	GO:0120039	0.6936619718316115	Direct		34		32		Direct
475	GO:0022604	GO:0120039	GO:0022604	GO:0120039	0.7492138364785593	Direct		35		32		Direct
618	GO:0040008	GO:0120039	GO:0040008	GO:0120039	0.31054977711887	Direct		56		32		Direct
486	GO:0045666	GO:0120039	GO:0045666	GO:0120039	0.5798295454555836	Direct		36		32		Direct
628	GO:0051961	GO:0120039	GO:0051961	GO:0120039	0.3668890236523678	Direct		61		32		Direct
636	GO:0045665	GO:0120039	GO:0045665	GO:0120039	0.34947984395502596	Direct		63		32		Direct
644	GO:0050768	GO:0120039	GO:0050768	GO:0120039	0.33714285714468767	Direct		64		32		Direct
668	GO:0010977	GO:0120039	GO:0010977	GO:0120039	0.3293622985304254	Direct		67		32		Direct
688	GO:0031345	GO:0120039	GO:0031345	GO:0120039	0.31659836065776786	Direct		68		32		Direct
703	GO:0010721	GO:0120039	GO:0010721	GO:0120039	0.33714285714468767	Direct		69		32		Direct
461	GO:0031344	GO:0120035	GO:0031344	GO:0120035	1.0	Direct		34		33		Direct
476	GO:0022604	GO:0120035	GO:0022604	GO:0120035	0.7317919075150503	Direct		35		33		Direct
619	GO:0040008	GO:0120035	GO:0040008	GO:0120035	0.3442742523719195	Direct		56		33		Direct
487	GO:0045666	GO:0120035	GO:0045666	GO:0120035	0.6131721550655457	Direct		36		33		Direct
629	GO:0051961	GO:0120035	GO:0051961	GO:0120035	0.35612788632492676	Direct		61		33		Direct
981	GO:0051495	GO:0120035	GO:0051495	GO:0120035	0.32683379758769887	Direct		133		33		Direct
637	GO:0045665	GO:0120035	GO:0045665	GO:0120035	0.3938242280301739	Direct		63		33		Direct
645	GO:0050768	GO:0120035	GO:0050768	GO:0120035	0.38068709378068294	Direct		64		33		Direct
652	GO:0045596	GO:0120035	GO:0045596	GO:0120035	0.31996974281541035	Direct		65		33		Direct
669	GO:0010977	GO:0120035	GO:0010977	GO:0120035	0.43718079673302573	Direct		67		33		Direct
689	GO:0031345	GO:0120035	GO:0031345	GO:0120035	0.4798206278041941	Direct		68		33		Direct
704	GO:0010721	GO:0120035	GO:0010721	GO:0120035	0.38068709378068294	Direct		69		33		Direct
1008	GO:0051493	GO:0120035	GO:0051493	GO:0120035	0.3336170212782405	Direct		139		33		Direct
388	GO:0009636	GO:0034614	GO:0009636	GO:0034614	0.507430997878374	Direct		22		23		Direct
389	GO:0009636	GO:0046677	GO:0009636	GO:0046677	0.6866404715136629	Direct		22		24		Direct
390	GO:0009636	WP15	GO:0009636	WP15	0.3790642347364802	Direct		22		120		Direct
391	GO:0009636	GO:0042542	GO:0009636	GO:0042542	0.5646651270222434	Direct		22		25		Direct
392	GO:0009636	GO:0098869	GO:0009636	GO:0098869	0.5170499603505957	Direct		22		121		Direct
393	GO:0009636	GO:0071236	GO:0009636	GO:0071236	0.4307159353367799	Direct		22		26		Direct
394	GO:0009636	GO:0070301	GO:0009636	GO:0070301	0.4664758789879976	Direct		22		27		Direct
395	GO:0009636	GO:1990748	GO:0009636	GO:1990748	0.5170499603505957	Direct		22		123		Direct
396	GO:0009636	GO:0098754	GO:0009636	GO:0098754	0.5170499603505957	Direct		22		124		Direct
477	GO:0022604	GO:0031344	GO:0022604	GO:0031344	0.7317919075150503	Direct		35		34		Direct
462	GO:0031344	GO:0040008	GO:0031344	GO:0040008	0.3442742523719195	Direct		34		56		Direct
463	GO:0031344	GO:0045666	GO:0031344	GO:0045666	0.6131721550655457	Direct		34		36		Direct
464	GO:0031344	GO:0051961	GO:0031344	GO:0051961	0.35612788632492676	Direct		34		61		Direct
465	GO:0031344	GO:0051495	GO:0031344	GO:0051495	0.32683379758769887	Direct		34		133		Direct
466	GO:0031344	GO:0045665	GO:0031344	GO:0045665	0.3938242280301739	Direct		34		63		Direct
467	GO:0031344	GO:0050768	GO:0031344	GO:0050768	0.38068709378068294	Direct		34		64		Direct
468	GO:0031344	GO:0045596	GO:0031344	GO:0045596	0.31996974281541035	Direct		34		65		Direct
670	GO:0010977	GO:0031344	GO:0010977	GO:0031344	0.43718079673302573	Direct		67		34		Direct
469	GO:0031344	GO:0031345	GO:0031344	GO:0031345	0.4798206278041941	Direct		34		68		Direct
705	GO:0010721	GO:0031344	GO:0010721	GO:0031344	0.38068709378068294	Direct		69		34		Direct
470	GO:0031344	GO:0051493	GO:0031344	GO:0051493	0.3336170212782405	Direct		34		139		Direct
398	GO:0034614	GO:0046677	GO:0034614	GO:0046677	0.4993359893777581	Direct		23		24		Direct
399	GO:0034614	GO:0042542	GO:0034614	GO:0042542	0.6565143824043923	Direct		23		25		Direct
400	GO:0034614	GO:0071236	GO:0034614	GO:0071236	0.6565143824043923	Direct		23		26		Direct
401	GO:0034614	GO:0070301	GO:0034614	GO:0070301	0.729981378027529	Direct		23		27		Direct
875	GO:0002042	GO:0034614	GO:0002042	GO:0034614	0.31764705882741023	Direct		107		23		Direct
810	GO:0006364	GO:0022613	GO:0006364	GO:0022613	0.6921443736739837	Direct		88		87		Direct
818	GO:0016072	GO:0022613	GO:0016072	GO:0022613	0.6921443736739837	Direct		89		87		Direct
804	GO:0022613	GO:0042273	GO:0022613	GO:0042273	0.4126582278502573	Direct		87		90		Direct
805	GO:0022613	GO:0034470	GO:0022613	GO:0034470	0.6494291470796004	Direct		87		91		Direct
806	GO:0022613	GO:0034660	GO:0022613	GO:0034660	0.6108626198093879	Direct		87		93		Direct
862	GO:0043534	WP3888	GO:0043534	WP3888	0.3921085080169701	Direct		104		156		Direct
869	GO:0010631	WP3888	GO:0010631	WP3888	0.3334549434534112	Direct		105		156		Direct
874	GO:0090132	WP3888	GO:0090132	WP3888	0.3334549434534112	Direct		106		156		Direct
876	GO:0002042	WP3888	GO:0002042	WP3888	0.3678474114466397	Direct		107		156		Direct
886	GO:0090130	WP3888	GO:0090130	WP3888	0.3334549434534112	Direct		108		156		Direct
888	GO:0045746	WP3888	GO:0045746	WP3888	0.3203125000028882	Direct		109		156		Direct
890	GO:0001667	WP3888	GO:0001667	WP3888	0.30880829015751765	Direct		110		156		Direct
902	GO:0001944	WP3888	GO:0001944	WP3888	0.4557640750684348	Direct		111		156		Direct
910	GO:0072358	WP3888	GO:0072358	WP3888	0.4557640750684348	Direct		112		156		Direct
723	R-HSA-3700989	WP4922	R-HSA-3700989	WP4922	0.4011799410055105	Direct		72		73		Direct
735	GO:0006123	R-HSA-3700989	GO:0006123	R-HSA-3700989	0.332822085892538	Direct		74		72		Direct
746	GO:0019646	R-HSA-3700989	GO:0019646	R-HSA-3700989	0.332822085892538	Direct		75		72		Direct
572	R-HSA-389958	R-HSA-389960	R-HSA-389958	R-HSA-389960	0.9076433121027639	Direct		47		48		Direct
573	R-HSA-389958	R-HSA-391251	R-HSA-389958	R-HSA-391251	0.8542713567849813	Direct		47		49		Direct
574	R-HSA-389958	WP2272	R-HSA-389958	WP2272	0.4912280701797532	Direct		47		50		Direct
575	R-HSA-389958	ko05130	R-HSA-389958	ko05130	0.4912280701797532	Direct		47		51		Direct
576	R-HSA-389958	hsa05130	R-HSA-389958	hsa05130	0.4912280701797532	Direct		47		52		Direct
577	R-HSA-389958	R-HSA-389977	R-HSA-389958	R-HSA-389977	0.5944055944097081	Direct		47		53		Direct
578	R-HSA-389958	R-HSA-9646399	R-HSA-389958	R-HSA-9646399	0.5382165605138197	Direct		47		54		Direct
478	GO:0022604	GO:0040008	GO:0022604	GO:0040008	0.35872235872388214	Direct		35		56		Direct
479	GO:0022604	GO:0045666	GO:0022604	GO:0045666	0.5549160671475208	Direct		35		36		Direct
480	GO:0022604	GO:0051961	GO:0022604	GO:0051961	0.30952380952588265	Direct		35		61		Direct
481	GO:0022604	GO:0045665	GO:0022604	GO:0045665	0.34794828555580737	Direct		35		63		Direct
482	GO:0022604	GO:0050768	GO:0022604	GO:0050768	0.3344262295103065	Direct		35		64		Direct
671	GO:0010977	GO:0022604	GO:0010977	GO:0022604	0.3936039360415236	Direct		67		35		Direct
483	GO:0022604	GO:0031345	GO:0022604	GO:0031345	0.3774597495549255	Direct		35		68		Direct
706	GO:0010721	GO:0022604	GO:0010721	GO:0022604	0.3344262295103065	Direct		69		35		Direct
913	GO:0009792	GO:0043009	GO:0009792	GO:0043009	1.0	Direct		113		158		Direct
914	GO:0001701	GO:0043009	GO:0001701	GO:0043009	0.743950294310735	Direct		114		158		Direct
776	GO:0001763	GO:0043009	GO:0001763	GO:0043009	0.3370827285942553	Direct		83		158		Direct
920	GO:0001824	GO:0043009	GO:0001824	GO:0043009	0.39731051344956925	Direct		115		158		Direct
929	GO:0045454	WP408	GO:0045454	WP408	0.4912280701797532	Direct		119		152		Direct
937	GO:0098869	WP408	GO:0098869	WP408	0.4170854271399255	Direct		121		152		Direct
942	R-HSA-3299685	WP408	R-HSA-3299685	WP408	0.5382165605138197	Direct		122		152		Direct
945	GO:1990748	WP408	GO:1990748	WP408	0.4170854271399255	Direct		123		152		Direct
949	GO:0098754	WP408	GO:0098754	WP408	0.4170854271399255	Direct		124		152		Direct
955	GO:0033194	WP408	GO:0033194	WP408	0.6627906976782081	Direct		125		152		Direct
1062	WP408	ko00480	WP408	ko00480	0.5944055944097081	Direct		152		126		Direct
1124	GO:0045050	GO:0071816	GO:0045050	GO:0071816	1.0	Direct		164		128		Direct
969	GO:0045048	GO:0045050	GO:0045048	GO:0045050	1.0	Direct		129		164		Direct
971	GO:0007029	GO:0045050	GO:0007029	GO:0045050	0.7972027972048541	Direct		130		164		Direct
975	GO:0010256	GO:0045050	GO:0010256	GO:0045050	0.388758782204519	Direct		131		164		Direct
762	GO:0048755	GO:2000172	GO:0048755	GO:2000172	0.8557213930369072	Direct		79		80		Direct
763	GO:0048755	GO:0071695	GO:0048755	GO:0071695	0.6091644204882305	Direct		79		81		Direct
769	GO:0014041	GO:0048755	GO:0014041	GO:0048755	0.8557213930369072	Direct		82		79		Direct
777	GO:0001763	GO:0048755	GO:0001763	GO:0048755	0.5642737896525796	Direct		83		79		Direct
764	GO:0048755	GO:0060688	GO:0048755	GO:0060688	0.6623544631344597	Direct		79		84		Direct
672	GO:0010977	GO:0048755	GO:0010977	GO:0048755	0.3229571984493083	Direct		67		79		Direct
765	GO:0048755	GO:1903429	GO:0048755	GO:1903429	0.8557213930369072	Direct		79		85		Direct
736	GO:0006123	WP4922	GO:0006123	WP4922	0.7229299363082918	Direct		74		73		Direct
747	GO:0019646	WP4922	GO:0019646	WP4922	0.7229299363082918	Direct		75		73		Direct
727	WP4922	WP678	WP4922	WP678	0.43798449613034673	Direct		73		76		Direct
759	GO:0009060	WP4922	GO:0009060	WP4922	0.6081081081111798	Direct		77		73		Direct
737	GO:0006123	GO:0019646	GO:0006123	GO:0019646	1.0	Direct		74		75		Direct
738	GO:0006123	WP678	GO:0006123	WP678	0.49455337691270373	Direct		74		76		Direct
739	GO:0006123	GO:0009060	GO:0006123	GO:0009060	0.8304919629824397	Direct		74		77		Direct
748	GO:0019646	WP678	GO:0019646	WP678	0.49455337691270373	Direct		75		76		Direct
760	GO:0009060	GO:0019646	GO:0009060	GO:0019646	0.8304919629824397	Direct		77		75		Direct
1116	GO:0010638	GO:1902905	GO:0010638	GO:1902905	0.5923694779128337	Direct		163		132		Direct
1117	GO:0010638	GO:0051495	GO:0010638	GO:0051495	0.6506024096395717	Direct		163		133		Direct
1118	GO:0010638	GO:1902903	GO:0010638	GO:1902903	0.5396825396837859	Direct		163		134		Direct
1119	GO:0010638	GO:0043254	GO:0010638	GO:0043254	0.36496350365131547	Direct		163		136		Direct
1120	GO:0010638	GO:0097435	GO:0010638	GO:0097435	0.46655518394778167	Direct		163		137		Direct
1121	GO:0010638	GO:0032970	GO:0010638	GO:0032970	0.4035259549478252	Direct		163		138		Direct
1122	GO:0010638	GO:0051493	GO:0010638	GO:0051493	0.5766423357675436	Direct		163		139		Direct
1123	GO:0010638	GO:0032271	GO:0010638	GO:0032271	0.40173724213000545	Direct		163		140		Direct
915	GO:0001701	GO:0009792	GO:0001701	GO:0009792	0.743950294310735	Direct		114		113		Direct
778	GO:0001763	GO:0009792	GO:0001763	GO:0009792	0.3370827285942553	Direct		83		113		Direct
921	GO:0001824	GO:0009792	GO:0001824	GO:0009792	0.39731051344956925	Direct		115		113		Direct
1105	GO:0002275	GO:0045055	GO:0002275	GO:0045055	0.8025718608173772	Direct		161		141		Direct
1106	GO:0002275	GO:0002283	GO:0002275	GO:0002283	0.9493302271404895	Direct		161		142		Direct
1028	GO:0002274	GO:0002275	GO:0002274	GO:0002275	0.9534510433387922	Direct		143		161		Direct
1107	GO:0002275	GO:0002446	GO:0002275	GO:0002446	0.9493302271404895	Direct		161		144		Direct
1108	GO:0002275	GO:0042119	GO:0002275	GO:0042119	0.9493302271404895	Direct		161		145		Direct
1109	GO:0002275	GO:0036230	GO:0002275	GO:0036230	0.9493302271404895	Direct		161		146		Direct
1110	GO:0002275	GO:0002444	GO:0002275	GO:0002444	0.9752136752137367	Direct		161		147		Direct
1111	GO:0002275	R-HSA-6798695	GO:0002275	R-HSA-6798695	0.9222751637881704	Direct		161		148		Direct
1112	GO:0002275	GO:0043312	GO:0002275	GO:0043312	0.9222751637881704	Direct		161		149		Direct
846	GO:0001654	GO:0002088	GO:0001654	GO:0002088	0.6561264822149172	Direct		98		97		Direct
840	GO:0002088	GO:0150063	GO:0002088	GO:0150063	0.6561264822149172	Direct		97		99		Direct
841	GO:0002088	GO:0048880	GO:0002088	GO:0048880	0.6561264822149172	Direct		97		100		Direct
842	GO:0002088	GO:0007601	GO:0002088	GO:0007601	0.6215040397783047	Direct		97		101		Direct
843	GO:0002088	GO:0050953	GO:0002088	GO:0050953	0.6215040397783047	Direct		97		102		Direct
844	GO:0002088	GO:0043010	GO:0002088	GO:0043010	0.75492957746599	Direct		97		103		Direct
1021	GO:0002283	GO:0045055	GO:0002283	GO:0045055	0.7949725058920616	Direct		142		141		Direct
1029	GO:0002274	GO:0045055	GO:0002274	GO:0045055	0.8096280087531379	Direct		143		141		Direct
1037	GO:0002446	GO:0045055	GO:0002446	GO:0045055	0.7949725058920616	Direct		144		141		Direct
1042	GO:0042119	GO:0045055	GO:0042119	GO:0045055	0.7949725058920616	Direct		145		141		Direct
1045	GO:0036230	GO:0045055	GO:0036230	GO:0045055	0.7949725058920616	Direct		146		141		Direct
1049	GO:0002444	GO:0045055	GO:0002444	GO:0045055	0.8211946050100336	Direct		147		141		Direct
1020	GO:0045055	R-HSA-6798695	GO:0045055	R-HSA-6798695	0.8141770124153296	Direct		141		148		Direct
1055	GO:0043312	GO:0045055	GO:0043312	GO:0045055	0.8141770124153296	Direct		149		141		Direct
622	GO:0030307	GO:0040008	GO:0030307	GO:0040008	0.5708245243142124	Direct		57		56		Direct
625	GO:0030308	GO:0040008	GO:0030308	GO:0040008	0.5708245243142124	Direct		58		56		Direct
620	GO:0040008	GO:0045926	GO:0040008	GO:0045926	0.6117404737395734	Direct		56		59		Direct
621	GO:0040008	GO:0045927	GO:0040008	GO:0045927	0.6117404737395734	Direct		56		60		Direct
623	GO:0030307	GO:0045666	GO:0030307	GO:0045666	0.34673144876576184	Direct		57		36		Direct
488	GO:0045666	GO:0045927	GO:0045666	GO:0045927	0.33148345784666694	Direct		36		60		Direct
1030	GO:0002274	GO:0002283	GO:0002274	GO:0002283	0.9030100334450513	Direct		143		142		Direct
1022	GO:0002283	GO:0002446	GO:0002283	GO:0002446	1.0	Direct		142		144		Direct
1023	GO:0002283	GO:0042119	GO:0002283	GO:0042119	1.0	Direct		142		145		Direct
1024	GO:0002283	GO:0036230	GO:0002283	GO:0036230	1.0	Direct		142		146		Direct
1025	GO:0002283	GO:0002444	GO:0002283	GO:0002444	0.9740840035746874	Direct		142		147		Direct
1026	GO:0002283	R-HSA-6798695	GO:0002283	R-HSA-6798695	0.972837964408441	Direct		142		148		Direct
1027	GO:0002283	GO:0043312	GO:0002283	GO:0043312	0.972837964408441	Direct		142		149		Direct
579	R-HSA-389960	R-HSA-391251	R-HSA-389960	R-HSA-391251	0.7650765076526045	Direct		48		49		Direct
580	R-HSA-389960	WP2272	R-HSA-389960	WP2272	0.5382165605138197	Direct		48		50		Direct
581	R-HSA-389960	ko05130	R-HSA-389960	ko05130	0.5382165605138197	Direct		48		51		Direct
582	R-HSA-389960	hsa05130	R-HSA-389960	hsa05130	0.5382165605138197	Direct		48		52		Direct
583	R-HSA-389960	R-HSA-389977	R-HSA-389960	R-HSA-389977	0.6623544631344597	Direct		48		53		Direct
584	R-HSA-389960	R-HSA-9646399	R-HSA-389960	R-HSA-9646399	0.5941690962140302	Direct		48		54		Direct
1031	GO:0002274	GO:0002446	GO:0002274	GO:0002446	0.9030100334450513	Direct		143		144		Direct
1032	GO:0002274	GO:0042119	GO:0002274	GO:0042119	0.9030100334450513	Direct		143		145		Direct
1033	GO:0002274	GO:0036230	GO:0002274	GO:0036230	0.9030100334450513	Direct		143		146		Direct
1034	GO:0002274	GO:0002444	GO:0002274	GO:0002444	0.9287469287470981	Direct		143		147		Direct
1035	GO:0002274	R-HSA-6798695	GO:0002274	R-HSA-6798695	0.876174210077164	Direct		143		148		Direct
1036	GO:0002274	GO:0043312	GO:0002274	GO:0043312	0.876174210077164	Direct		143		149		Direct
766	GO:0071695	GO:2000172	GO:0071695	GO:2000172	0.4934497816636661	Direct		81		80		Direct
770	GO:0014041	GO:2000172	GO:0014041	GO:2000172	1.0	Direct		82		80		Direct
779	GO:0001763	GO:2000172	GO:0001763	GO:2000172	0.45430107527307206	Direct		83		80		Direct
790	GO:0060688	GO:2000172	GO:0060688	GO:2000172	0.7472766884563519	Direct		84		80		Direct
673	GO:0010977	GO:2000172	GO:0010977	GO:2000172	0.35555555556149004	Direct		67		80		Direct
690	GO:0031345	GO:2000172	GO:0031345	GO:2000172	0.32459970888488815	Direct		68		80		Direct
795	GO:1903429	GO:2000172	GO:1903429	GO:2000172	1.0	Direct		85		80		Direct
930	GO:0045454	WP15	GO:0045454	WP15	0.5628140703549441	Direct		119		120		Direct
931	GO:0045454	GO:0098869	GO:0045454	GO:0098869	0.5628140703549441	Direct		119		121		Direct
932	GO:0045454	R-HSA-3299685	GO:0045454	R-HSA-3299685	0.7229299363082918	Direct		119		122		Direct
933	GO:0045454	GO:1990748	GO:0045454	GO:1990748	0.5628140703549441	Direct		119		123		Direct
934	GO:0045454	GO:0098754	GO:0045454	GO:0098754	0.5628140703549441	Direct		119		124		Direct
935	GO:0045454	ko00480	GO:0045454	ko00480	0.3916083916145622	Direct		119		126		Direct
963	GO:0042744	GO:0045454	GO:0042744	GO:0045454	0.43798449613034673	Direct		127		119		Direct
1038	GO:0002446	GO:0042119	GO:0002446	GO:0042119	1.0	Direct		144		145		Direct
1039	GO:0002446	GO:0036230	GO:0002446	GO:0036230	1.0	Direct		144		146		Direct
1050	GO:0002444	GO:0002446	GO:0002444	GO:0002446	0.9740840035746874	Direct		147		144		Direct
1040	GO:0002446	R-HSA-6798695	GO:0002446	R-HSA-6798695	0.972837964408441	Direct		144		148		Direct
1041	GO:0002446	GO:0043312	GO:0002446	GO:0043312	0.972837964408441	Direct		144		149		Direct
1046	GO:0036230	GO:0042119	GO:0036230	GO:0042119	1.0	Direct		146		145		Direct
1051	GO:0002444	GO:0042119	GO:0002444	GO:0042119	0.9740840035746874	Direct		147		145		Direct
1043	GO:0042119	R-HSA-6798695	GO:0042119	R-HSA-6798695	0.972837964408441	Direct		145		148		Direct
1044	GO:0042119	GO:0043312	GO:0042119	GO:0043312	0.972837964408441	Direct		145		149		Direct
982	GO:0051495	GO:1902905	GO:0051495	GO:1902905	0.9136904761908485	Direct		133		132		Direct
978	GO:1902905	WP2272	GO:1902905	WP2272	0.31764705882741023	Direct		132		50		Direct
979	GO:1902905	ko05130	GO:1902905	ko05130	0.31764705882741023	Direct		132		51		Direct
980	GO:1902905	hsa05130	GO:1902905	hsa05130	0.31764705882741023	Direct		132		52		Direct
988	GO:1902903	GO:1902905	GO:1902903	GO:1902905	0.8844621513948673	Direct		134		132		Direct
863	GO:0043534	GO:1902905	GO:0043534	GO:1902905	0.36209813875101426	Direct		104		132		Direct
989	GO:0031112	GO:1902905	GO:0031112	GO:1902905	0.49122807017867404	Direct		135		132		Direct
995	GO:0043254	GO:1902905	GO:0043254	GO:1902905	0.4794871794891143	Direct		136		132		Direct
1000	GO:0097435	GO:1902905	GO:0097435	GO:1902905	0.7387387387395922	Direct		137		132		Direct
1002	GO:0032970	GO:1902905	GO:0032970	GO:1902905	0.6266094420616354	Direct		138		132		Direct
1009	GO:0051493	GO:1902905	GO:0051493	GO:1902905	0.776923076923906	Direct		139		132		Direct
1013	GO:0032271	GO:1902905	GO:0032271	GO:1902905	0.6565143824043923	Direct		140		132		Direct
1052	GO:0002444	GO:0036230	GO:0002444	GO:0036230	0.9740840035746874	Direct		147		146		Direct
1047	GO:0036230	R-HSA-6798695	GO:0036230	R-HSA-6798695	0.972837964408441	Direct		146		148		Direct
1048	GO:0036230	GO:0043312	GO:0036230	GO:0043312	0.972837964408441	Direct		146		149		Direct
406	GO:0042542	GO:0046677	GO:0042542	GO:0046677	0.741648106905344	Direct		25		24		Direct
403	GO:0046677	GO:0071236	GO:0046677	GO:0071236	0.741648106905344	Direct		24		26		Direct
404	GO:0046677	GO:0070301	GO:0046677	GO:0070301	0.6261079774392975	Direct		24		27		Direct
1053	GO:0002444	R-HSA-6798695	GO:0002444	R-HSA-6798695	0.946959304984137	Direct		147		148		Direct
1054	GO:0002444	GO:0043312	GO:0002444	GO:0043312	0.946959304984137	Direct		147		149		Direct
938	GO:0098869	WP15	GO:0098869	WP15	0.7441176470604606	Direct		121		120		Direct
943	R-HSA-3299685	WP15	R-HSA-3299685	WP15	0.4518451845227437	Direct		122		120		Direct
946	GO:1990748	WP15	GO:1990748	WP15	0.7441176470604606	Direct		123		120		Direct
950	GO:0098754	WP15	GO:0098754	WP15	0.7441176470604606	Direct		124		120		Direct
936	WP15	ko00480	WP15	ko00480	0.3229571984493083	Direct		120		126		Direct
964	GO:0042744	WP15	GO:0042744	WP15	0.5396825396867786	Direct		127		120		Direct
847	GO:0001654	GO:0150063	GO:0001654	GO:0150063	1.0	Direct		98		99		Direct
848	GO:0001654	GO:0048880	GO:0001654	GO:0048880	1.0	Direct		98		100		Direct
849	GO:0001654	GO:0007601	GO:0001654	GO:0007601	0.4228217602852819	Direct		98		101		Direct
850	GO:0001654	GO:0050953	GO:0001654	GO:0050953	0.4228217602852819	Direct		98		102		Direct
851	GO:0001654	GO:0043010	GO:0001654	GO:0043010	0.892104175279429	Direct		98		103		Direct
1056	GO:0043312	R-HSA-6798695	GO:0043312	R-HSA-6798695	1.0	Direct		149		148		Direct
852	GO:0048880	GO:0150063	GO:0048880	GO:0150063	1.0	Direct		100		99		Direct
854	GO:0007601	GO:0150063	GO:0007601	GO:0150063	0.4228217602852819	Direct		101		99		Direct
858	GO:0050953	GO:0150063	GO:0050953	GO:0150063	0.4228217602852819	Direct		102		99		Direct
859	GO:0043010	GO:0150063	GO:0043010	GO:0150063	0.892104175279429	Direct		103		99		Direct
970	GO:0045048	GO:0071816	GO:0045048	GO:0071816	1.0	Direct		129		128		Direct
972	GO:0007029	GO:0071816	GO:0007029	GO:0071816	0.7972027972048541	Direct		130		128		Direct
976	GO:0010256	GO:0071816	GO:0010256	GO:0071816	0.388758782204519	Direct		131		128		Direct
630	GO:0051961	GO:0060322	GO:0051961	GO:0060322	0.43225605966592295	Direct		61		62		Direct
638	GO:0045665	GO:0051961	GO:0045665	GO:0051961	0.8755958055295913	Direct		63		61		Direct
780	GO:0001763	GO:0051961	GO:0001763	GO:0051961	0.31020812686124954	Direct		83		61		Direct
646	GO:0050768	GO:0051961	GO:0050768	GO:0051961	0.9201101928377847	Direct		64		61		Direct
631	GO:0051961	GO:0060688	GO:0051961	GO:0060688	0.3009888751582705	Direct		61		84		Direct
653	GO:0045596	GO:0051961	GO:0045596	GO:0051961	0.6494291470796004	Direct		65		61		Direct
657	GO:0007420	GO:0051961	GO:0007420	GO:0051961	0.42960662526051174	Direct		66		61		Direct
674	GO:0010977	GO:0051961	GO:0010977	GO:0051961	0.7190527448882909	Direct		67		61		Direct
691	GO:0031345	GO:0051961	GO:0031345	GO:0051961	0.6857585139332993	Direct		68		61		Direct
707	GO:0010721	GO:0051961	GO:0010721	GO:0051961	0.9201101928377847	Direct		69		61		Direct
891	GO:0001667	GO:0051961	GO:0001667	GO:0051961	0.31637717121834086	Direct		110		61		Direct
632	GO:0051961	GO:0060993	GO:0051961	GO:0060993	0.3009888751582705	Direct		61		86		Direct
639	GO:0045665	GO:0060322	GO:0045665	GO:0060322	0.36082818500770103	Direct		63		62		Direct
781	GO:0001763	GO:0060322	GO:0001763	GO:0060322	0.3147260273993019	Direct		83		62		Direct
647	GO:0050768	GO:0060322	GO:0050768	GO:0060322	0.3479960899334222	Direct		64		62		Direct
658	GO:0007420	GO:0060322	GO:0007420	GO:0060322	0.9069394304053509	Direct		66		62		Direct
708	GO:0010721	GO:0060322	GO:0010721	GO:0060322	0.3479960899334222	Direct		69		62		Direct
855	GO:0007601	GO:0048880	GO:0007601	GO:0048880	0.4228217602852819	Direct		101		100		Direct
853	GO:0048880	GO:0050953	GO:0048880	GO:0050953	0.4228217602852819	Direct		100		102		Direct
860	GO:0043010	GO:0048880	GO:0043010	GO:0048880	0.892104175279429	Direct		103		100		Direct
983	GO:0051495	WP2272	GO:0051495	WP2272	0.31764705882741023	Direct		133		50		Direct
984	GO:0051495	ko05130	GO:0051495	ko05130	0.31764705882741023	Direct		133		51		Direct
985	GO:0051495	hsa05130	GO:0051495	hsa05130	0.31764705882741023	Direct		133		52		Direct
986	GO:0051495	GO:1902903	GO:0051495	GO:1902903	0.8074369189914454	Direct		133		134		Direct
990	GO:0031112	GO:0051495	GO:0031112	GO:0051495	0.49122807017867404	Direct		135		133		Direct
996	GO:0043254	GO:0051495	GO:0043254	GO:0051495	0.4794871794891143	Direct		136		133		Direct
987	GO:0051495	GO:0097435	GO:0051495	GO:0097435	0.6734234234244902	Direct		133		137		Direct
1003	GO:0032970	GO:0051495	GO:0032970	GO:0051495	0.6266094420616354	Direct		138		133		Direct
1010	GO:0051493	GO:0051495	GO:0051493	GO:0051495	0.851282051282604	Direct		139		133		Direct
1014	GO:0032271	GO:0051495	GO:0032271	GO:0051495	0.6565143824043923	Direct		140		133		Direct
585	R-HSA-391251	WP2272	R-HSA-391251	WP2272	0.4170854271399255	Direct		49		50		Direct
586	R-HSA-391251	ko05130	R-HSA-391251	ko05130	0.4170854271399255	Direct		49		51		Direct
587	R-HSA-391251	hsa05130	R-HSA-391251	hsa05130	0.4170854271399255	Direct		49		52		Direct
592	R-HSA-389977	R-HSA-391251	R-HSA-389977	R-HSA-391251	0.6614785992246541	Direct		53		49		Direct
588	R-HSA-391251	R-HSA-9646399	R-HSA-391251	R-HSA-9646399	0.4518451845227437	Direct		49		54		Direct
761	GO:0009060	WP678	GO:0009060	WP678	0.39267015707420866	Direct		77		76		Direct
624	GO:0030307	GO:0045927	GO:0030307	GO:0045927	0.9509029345374871	Direct		57		60		Direct
811	GO:0006364	GO:0016072	GO:0006364	GO:0016072	1.0	Direct		88		89		Direct
812	GO:0006364	GO:0042273	GO:0006364	GO:0042273	0.4313725490228419	Direct		88		90		Direct
813	GO:0006364	GO:0034470	GO:0006364	GO:0034470	0.9201101928377847	Direct		88		91		Direct
825	GO:0000470	GO:0006364	GO:0000470	GO:0006364	0.39160839161250466	Direct		92		88		Direct
814	GO:0006364	GO:0034660	GO:0006364	GO:0034660	0.851282051282604	Direct		88		93		Direct
589	WP2272	ko05130	WP2272	ko05130	1.0	Direct		50		51		Direct
590	WP2272	hsa05130	WP2272	hsa05130	1.0	Direct		50		52		Direct
593	R-HSA-389977	WP2272	R-HSA-389977	WP2272	0.5944055944097081	Direct		53		50		Direct
597	R-HSA-9646399	WP2272	R-HSA-9646399	WP2272	0.5382165605138197	Direct		54		50		Direct
877	GO:0002042	WP2272	GO:0002042	WP2272	0.32163742690633756	Direct		107		50		Direct
591	hsa05130	ko05130	hsa05130	ko05130	1.0	Direct		52		51		Direct
594	R-HSA-389977	ko05130	R-HSA-389977	ko05130	0.5944055944097081	Direct		53		51		Direct
598	R-HSA-9646399	ko05130	R-HSA-9646399	ko05130	0.5382165605138197	Direct		54		51		Direct
878	GO:0002042	ko05130	GO:0002042	ko05130	0.32163742690633756	Direct		107		51		Direct
407	GO:0042542	GO:0071236	GO:0042542	GO:0071236	0.7718780727643297	Direct		25		26		Direct
408	GO:0042542	GO:0070301	GO:0042542	GO:0070301	0.8721058434407294	Direct		25		27		Direct
409	GO:0042542	GO:0043534	GO:0042542	GO:0043534	0.3156342182929889	Direct		25		104		Direct
410	GO:0042542	GO:0042744	GO:0042542	GO:0042744	0.32459970888488815	Direct		25		127		Direct
939	GO:0098869	R-HSA-3299685	GO:0098869	R-HSA-3299685	0.608460846087674	Direct		121		122		Direct
940	GO:0098869	GO:1990748	GO:0098869	GO:1990748	1.0	Direct		121		123		Direct
951	GO:0098754	GO:0098869	GO:0098754	GO:0098869	1.0	Direct		124		121		Direct
956	GO:0033194	GO:0098869	GO:0033194	GO:0098869	0.35555555556149004	Direct		125		121		Direct
941	GO:0098869	ko00480	GO:0098869	ko00480	0.6614785992246541	Direct		121		126		Direct
965	GO:0042744	GO:0098869	GO:0042744	GO:0098869	0.5396825396867786	Direct		127		121		Direct
973	GO:0007029	GO:0045048	GO:0007029	GO:0045048	0.7972027972048541	Direct		130		129		Direct
977	GO:0010256	GO:0045048	GO:0010256	GO:0045048	0.388758782204519	Direct		131		129		Direct
947	GO:1990748	R-HSA-3299685	GO:1990748	R-HSA-3299685	0.608460846087674	Direct		123		122		Direct
952	GO:0098754	R-HSA-3299685	GO:0098754	R-HSA-3299685	0.608460846087674	Direct		124		122		Direct
944	R-HSA-3299685	ko00480	R-HSA-3299685	ko00480	0.6623544631344597	Direct		122		126		Direct
966	GO:0042744	R-HSA-3299685	GO:0042744	R-HSA-3299685	0.49455337691270373	Direct		127		122		Direct
413	GO:0070301	GO:0071236	GO:0070301	GO:0071236	0.8721058434407294	Direct		27		26		Direct
595	R-HSA-389977	hsa05130	R-HSA-389977	hsa05130	0.5944055944097081	Direct		53		52		Direct
599	R-HSA-9646399	hsa05130	R-HSA-9646399	hsa05130	0.5382165605138197	Direct		54		52		Direct
879	GO:0002042	hsa05130	GO:0002042	hsa05130	0.32163742690633756	Direct		107		52		Direct
782	GO:0001763	GO:0045665	GO:0001763	GO:0045665	0.36173814898733203	Direct		83		63		Direct
640	GO:0045665	GO:0050768	GO:0045665	GO:0050768	0.9550387596901246	Direct		63		64		Direct
641	GO:0045665	GO:0060688	GO:0045665	GO:0060688	0.362403810923817	Direct		63		84		Direct
654	GO:0045596	GO:0045665	GO:0045596	GO:0045665	0.6520000000011008	Direct		65		63		Direct
659	GO:0007420	GO:0045665	GO:0007420	GO:0045665	0.34794828555580737	Direct		66		63		Direct
675	GO:0010977	GO:0045665	GO:0010977	GO:0045665	0.8377874456192735	Direct		67		63		Direct
692	GO:0031345	GO:0045665	GO:0031345	GO:0045665	0.7941437444553627	Direct		68		63		Direct
709	GO:0010721	GO:0045665	GO:0010721	GO:0045665	0.9550387596901246	Direct		69		63		Direct
642	GO:0045665	GO:0060993	GO:0045665	GO:0060993	0.362403810923817	Direct		63		86		Direct
596	R-HSA-389977	R-HSA-9646399	R-HSA-389977	R-HSA-9646399	0.6623544631344597	Direct		53		54		Direct
856	GO:0007601	GO:0050953	GO:0007601	GO:0050953	1.0	Direct		101		102		Direct
857	GO:0007601	GO:0043010	GO:0007601	GO:0043010	0.48227126209000964	Direct		101		103		Direct
864	GO:0043534	GO:1902903	GO:0043534	GO:1902903	0.3110616184142507	Direct		104		134		Direct
991	GO:0031112	GO:1902903	GO:0031112	GO:1902903	0.4103512014819032	Direct		135		134		Direct
997	GO:0043254	GO:1902903	GO:0043254	GO:1902903	0.49359720605526075	Direct		136		134		Direct
1001	GO:0097435	GO:1902903	GO:0097435	GO:1902903	0.8497409326429385	Direct		137		134		Direct
1004	GO:0032970	GO:1902903	GO:0032970	GO:1902903	0.7023733162294584	Direct		138		134		Direct
1011	GO:0051493	GO:1902903	GO:0051493	GO:1902903	0.8311990686850869	Direct		139		134		Direct
1015	GO:0032271	GO:1902903	GO:0032271	GO:1902903	0.6555308092071254	Direct		140		134		Direct
791	GO:0060688	GO:0070301	GO:0060688	GO:0070301	0.3219678519297587	Direct		84		27		Direct
916	GO:0001701	GO:0001824	GO:0001701	GO:0001824	0.5901060070692381	Direct		114		115		Direct
917	GO:0001701	GO:0001835	GO:0001701	GO:0001835	0.34362139918087153	Direct		114		116		Direct
918	GO:0001701	GO:0035188	GO:0001701	GO:0035188	0.34362139918087153	Direct		114		117		Direct
919	GO:0001701	GO:0071684	GO:0001701	GO:0071684	0.34362139918087153	Direct		114		118		Direct
953	GO:0098754	GO:1990748	GO:0098754	GO:1990748	1.0	Direct		124		123		Direct
957	GO:0033194	GO:1990748	GO:0033194	GO:1990748	0.35555555556149004	Direct		125		123		Direct
948	GO:1990748	ko00480	GO:1990748	ko00480	0.6614785992246541	Direct		123		126		Direct
967	GO:0042744	GO:1990748	GO:0042744	GO:1990748	0.5396825396867786	Direct		127		123		Direct
861	GO:0043010	GO:0050953	GO:0043010	GO:0050953	0.48227126209000964	Direct		103		102		Direct
626	GO:0030308	GO:0045926	GO:0030308	GO:0045926	0.9509029345374871	Direct		58		59		Direct
676	GO:0010977	GO:0030308	GO:0010977	GO:0030308	0.3158584534770339	Direct		67		58		Direct
771	GO:0014041	GO:0071695	GO:0014041	GO:0071695	0.4934497816636661	Direct		82		81		Direct
783	GO:0001763	GO:0071695	GO:0001763	GO:0071695	0.5130597014951718	Direct		83		81		Direct
792	GO:0060688	GO:0071695	GO:0060688	GO:0071695	0.41781681305317014	Direct		84		81		Direct
677	GO:0010977	GO:0071695	GO:0010977	GO:0071695	0.3367983368023361	Direct		67		81		Direct
693	GO:0031345	GO:0071695	GO:0031345	GO:0071695	0.3156342182929889	Direct		68		81		Direct
767	GO:0071695	GO:1903429	GO:0071695	GO:1903429	0.4934497816636661	Direct		81		85		Direct
835	CORUM:2904	CORUM:2905	CORUM:2904	CORUM:2905	1.0	Direct		94		95		Direct
836	CORUM:2904	CORUM:2948	CORUM:2904	CORUM:2948	0.6637681159476809	Direct		94		96		Direct
784	GO:0001763	GO:0014041	GO:0001763	GO:0014041	0.45430107527307206	Direct		83		82		Direct
772	GO:0014041	GO:0060688	GO:0014041	GO:0060688	0.7472766884563519	Direct		82		84		Direct
678	GO:0010977	GO:0014041	GO:0010977	GO:0014041	0.35555555556149004	Direct		67		82		Direct
773	GO:0014041	GO:0031345	GO:0014041	GO:0031345	0.32459970888488815	Direct		82		68		Direct
774	GO:0014041	GO:1903429	GO:0014041	GO:1903429	1.0	Direct		82		85		Direct
785	GO:0001763	GO:0050768	GO:0001763	GO:0050768	0.3430420712004943	Direct		83		64		Direct
786	GO:0001763	GO:0060688	GO:0001763	GO:0060688	0.6601562500023102	Direct		83		84		Direct
787	GO:0001763	GO:0010721	GO:0001763	GO:0010721	0.3430420712004943	Direct		83		69		Direct
788	GO:0001763	GO:1903429	GO:0001763	GO:1903429	0.45430107527307206	Direct		83		85		Direct
789	GO:0001763	GO:0060993	GO:0001763	GO:0060993	0.5242187500032341	Direct		83		86		Direct
819	GO:0016072	GO:0042273	GO:0016072	GO:0042273	0.4313725490228419	Direct		89		90		Direct
820	GO:0016072	GO:0034470	GO:0016072	GO:0034470	0.9201101928377847	Direct		89		91		Direct
826	GO:0000470	GO:0016072	GO:0000470	GO:0016072	0.39160839161250466	Direct		92		89		Direct
821	GO:0016072	GO:0034660	GO:0016072	GO:0034660	0.851282051282604	Direct		89		93		Direct
838	CORUM:2905	CORUM:2948	CORUM:2905	CORUM:2948	0.6637681159476809	Direct		95		96		Direct
648	GO:0050768	GO:0060688	GO:0050768	GO:0060688	0.3395445134615216	Direct		64		84		Direct
627	GO:0045926	GO:0050768	GO:0045926	GO:0050768	0.3255813953518694	Direct		59		64		Direct
655	GO:0045596	GO:0050768	GO:0045596	GO:0050768	0.6921443736739837	Direct		65		64		Direct
660	GO:0007420	GO:0050768	GO:0007420	GO:0050768	0.3344262295103065	Direct		66		64		Direct
679	GO:0010977	GO:0050768	GO:0010977	GO:0050768	0.7943262411358093	Direct		67		64		Direct
694	GO:0031345	GO:0050768	GO:0031345	GO:0050768	0.7546531302888517	Direct		68		64		Direct
710	GO:0010721	GO:0050768	GO:0010721	GO:0050768	1.0	Direct		69		64		Direct
892	GO:0001667	GO:0050768	GO:0001667	GO:0050768	0.3452855245709144	Direct		110		64		Direct
649	GO:0050768	GO:0060993	GO:0050768	GO:0060993	0.3395445134615216	Direct		64		86		Direct
823	GO:0034470	GO:0042273	GO:0034470	GO:0042273	0.3851590106038571	Direct		91		90		Direct
827	GO:0000470	GO:0042273	GO:0000470	GO:0042273	0.6627906976782081	Direct		92		90		Direct
833	GO:0034660	GO:0042273	GO:0034660	GO:0042273	0.3472668810319819	Direct		93		90		Direct
711	GO:0010721	GO:0060688	GO:0010721	GO:0060688	0.3395445134615216	Direct		69		84		Direct
793	GO:0060688	GO:1903429	GO:0060688	GO:1903429	0.7472766884563519	Direct		84		85		Direct
794	GO:0060688	GO:0060993	GO:0060688	GO:0060993	0.3912536443210453	Direct		84		86		Direct
958	GO:0033194	GO:0098754	GO:0033194	GO:0098754	0.35555555556149004	Direct		125		124		Direct
954	GO:0098754	ko00480	GO:0098754	ko00480	0.6614785992246541	Direct		124		126		Direct
968	GO:0042744	GO:0098754	GO:0042744	GO:0098754	0.5396825396867786	Direct		127		124		Direct
712	GO:0010721	GO:0045926	GO:0010721	GO:0045926	0.3255813953518694	Direct		69		59		Direct
680	GO:0010977	GO:0045596	GO:0010977	GO:0045596	0.5170499603505957	Direct		67		65		Direct
695	GO:0031345	GO:0045596	GO:0031345	GO:0045596	0.4976905311795117	Direct		68		65		Direct
713	GO:0010721	GO:0045596	GO:0010721	GO:0045596	0.6921443736739837	Direct		69		65		Direct
974	GO:0007029	GO:0010256	GO:0007029	GO:0010256	0.5337620578799871	Direct		130		131		Direct
959	GO:0033194	GO:0043534	GO:0033194	GO:0043534	0.32459970888488815	Direct		125		104		Direct
870	GO:0010631	GO:0043534	GO:0010631	GO:0043534	0.8124494745360452	Direct		105		104		Direct
865	GO:0043534	GO:0090132	GO:0043534	GO:0090132	0.8124494745360452	Direct		104		106		Direct
880	GO:0002042	GO:0043534	GO:0002042	GO:0043534	0.795774647888714	Direct		107		104		Direct
866	GO:0043534	GO:0090130	GO:0043534	GO:0090130	0.8124494745360452	Direct		104		108		Direct
867	GO:0043534	GO:0097435	GO:0043534	GO:0097435	0.32059186190131955	Direct		104		137		Direct
893	GO:0001667	GO:0043534	GO:0001667	GO:0043534	0.741648106905344	Direct		110		104		Direct
903	GO:0001944	GO:0043534	GO:0001944	GO:0043534	0.5849731663699503	Direct		111		104		Direct
868	GO:0043534	GO:0072358	GO:0043534	GO:0072358	0.5849731663699503	Direct		104		112		Direct
661	GO:0007420	GO:0031345	GO:0007420	GO:0031345	0.30828861061658386	Direct		66		68		Direct
662	GO:0007420	GO:0010721	GO:0007420	GO:0010721	0.3344262295103065	Direct		66		69		Direct
992	GO:0031112	GO:0097435	GO:0031112	GO:0097435	0.3203125000028882	Direct		135		137		Direct
993	GO:0031112	GO:0051493	GO:0031112	GO:0051493	0.388758782204519	Direct		135		139		Direct
994	GO:0031112	GO:0032271	GO:0031112	GO:0032271	0.45283018868352276	Direct		135		140		Direct
681	GO:0010977	GO:0031345	GO:0010977	GO:0031345	0.9397089397093034	Direct		67		68		Direct
714	GO:0010721	GO:0010977	GO:0010721	GO:0010977	0.7943262411358093	Direct		69		67		Direct
682	GO:0010977	GO:1903429	GO:0010977	GO:1903429	0.35555555556149004	Direct		67		85		Direct
715	GO:0010721	GO:0031345	GO:0010721	GO:0031345	0.7546531302888517	Direct		69		68		Direct
696	GO:0031345	GO:1903429	GO:0031345	GO:1903429	0.32459970888488815	Direct		68		85		Direct
922	GO:0001824	GO:0001835	GO:0001824	GO:0001835	0.6627906976782081	Direct		115		116		Direct
923	GO:0001824	GO:0035188	GO:0001824	GO:0035188	0.6627906976782081	Direct		115		117		Direct
924	GO:0001824	GO:0071684	GO:0001824	GO:0071684	0.6627906976782081	Direct		115		118		Direct
960	GO:0033194	ko00480	GO:0033194	ko00480	0.5671641791107215	Direct		125		126		Direct
961	GO:0033194	GO:0042744	GO:0033194	GO:0042744	0.32753623189536185	Direct		125		127		Direct
828	GO:0000470	GO:0034470	GO:0000470	GO:0034470	0.34362139918087153	Direct		92		91		Direct
824	GO:0034470	GO:0034660	GO:0034470	GO:0034660	0.9303442754205788	Direct		91		93		Direct
998	GO:0043254	GO:0097435	GO:0043254	GO:0097435	0.4145356662197488	Direct		136		137		Direct
1005	GO:0032970	GO:0043254	GO:0032970	GO:0043254	0.38859032658343073	Direct		138		136		Direct
999	GO:0043254	GO:0051493	GO:0043254	GO:0051493	0.4759036144595479	Direct		136		139		Direct
1016	GO:0032271	GO:0043254	GO:0032271	GO:0043254	0.7104136947230237	Direct		140		136		Direct
894	GO:0001667	GO:0010721	GO:0001667	GO:0010721	0.3452855245709144	Direct		110		69		Direct
716	GO:0010721	GO:0060993	GO:0010721	GO:0060993	0.3395445134615216	Direct		69		86		Direct
871	GO:0010631	GO:0090132	GO:0010631	GO:0090132	1.0	Direct		105		106		Direct
881	GO:0002042	GO:0010631	GO:0002042	GO:0010631	0.6226765799276848	Direct		107		105		Direct
872	GO:0010631	GO:0090130	GO:0010631	GO:0090130	1.0	Direct		105		108		Direct
895	GO:0001667	GO:0010631	GO:0001667	GO:0010631	0.9255933290573646	Direct		110		105		Direct
904	GO:0001944	GO:0010631	GO:0001944	GO:0010631	0.5066454013837645	Direct		111		105		Direct
873	GO:0010631	GO:0072358	GO:0010631	GO:0072358	0.5066454013837645	Direct		105		112		Direct
882	GO:0002042	GO:0090132	GO:0002042	GO:0090132	0.6226765799276848	Direct		107		106		Direct
887	GO:0090130	GO:0090132	GO:0090130	GO:0090132	1.0	Direct		108		106		Direct
896	GO:0001667	GO:0090132	GO:0001667	GO:0090132	0.9255933290573646	Direct		110		106		Direct
905	GO:0001944	GO:0090132	GO:0001944	GO:0090132	0.5066454013837645	Direct		111		106		Direct
911	GO:0072358	GO:0090132	GO:0072358	GO:0090132	0.5066454013837645	Direct		112		106		Direct
883	GO:0002042	GO:0090130	GO:0002042	GO:0090130	0.6226765799276848	Direct		107		108		Direct
884	GO:0002042	GO:0045746	GO:0002042	GO:0045746	0.3916083916145622	Direct		107		109		Direct
897	GO:0001667	GO:0002042	GO:0001667	GO:0002042	0.5606060606082057	Direct		110		107		Direct
906	GO:0001944	GO:0002042	GO:0001944	GO:0002042	0.42913385826988926	Direct		111		107		Direct
885	GO:0002042	GO:0072358	GO:0002042	GO:0072358	0.42913385826988926	Direct		107		112		Direct
898	GO:0001667	GO:0090130	GO:0001667	GO:0090130	0.9255933290573646	Direct		110		108		Direct
907	GO:0001944	GO:0090130	GO:0001944	GO:0090130	0.5066454013837645	Direct		111		108		Direct
912	GO:0072358	GO:0090130	GO:0072358	GO:0090130	0.5066454013837645	Direct		112		108		Direct
908	GO:0001944	GO:0045746	GO:0001944	GO:0045746	0.30661040787905897	Direct		111		109		Direct
889	GO:0045746	GO:0072358	GO:0045746	GO:0072358	0.30661040787905897	Direct		109		112		Direct
1006	GO:0032970	GO:0097435	GO:0032970	GO:0097435	0.5873768697568735	Direct		138		137		Direct
1012	GO:0051493	GO:0097435	GO:0051493	GO:0097435	0.7072678331098743	Direct		139		137		Direct
1017	GO:0032271	GO:0097435	GO:0032271	GO:0097435	0.5351418002482713	Direct		140		137		Direct
899	GO:0001667	GO:0001944	GO:0001667	GO:0001944	0.47352496218005696	Direct		110		111		Direct
900	GO:0001667	GO:0072358	GO:0001667	GO:0072358	0.47352496218005696	Direct		110		112		Direct
925	GO:0001835	GO:0035188	GO:0001835	GO:0035188	1.0	Direct		116		117		Direct
926	GO:0001835	GO:0071684	GO:0001835	GO:0071684	1.0	Direct		116		118		Direct
927	GO:0035188	GO:0071684	GO:0035188	GO:0071684	1.0	Direct		117		118		Direct
909	GO:0001944	GO:0072358	GO:0001944	GO:0072358	1.0	Direct		111		112		Direct
1007	GO:0032970	GO:0051493	GO:0032970	GO:0051493	0.7482430756520009	Direct		138		139		Direct
1018	GO:0032271	GO:0032970	GO:0032271	GO:0032970	0.5311236863401132	Direct		140		138		Direct
1019	GO:0032271	GO:0051493	GO:0032271	GO:0051493	0.6276747503581734	Direct		140		139		Direct
829	GO:0000470	GO:0034660	GO:0000470	GO:0034660	0.30570902394477595	Direct		92		93		Direct
1352	GO:0006979	GO:0072358	GO:0006979	GO:0072358	0.3485760128374561	Direct		3	167	58	112	Direct
1353	GO:0006979	GO:0043534	GO:0006979	GO:0043534	0.3273589878776494	Direct		3	167	66	104	Direct
1354	GO:0006979	GO:0098754	GO:0006979	GO:0098754	0.40346445326784164	Direct		3	167	46	124	Direct
1355	GO:0006979	GO:1990748	GO:0006979	GO:1990748	0.40346445326784164	Direct		3	167	47	123	Direct
1356	GO:0006979	GO:0070301	GO:0006979	GO:0070301	0.41924717226221087	Direct		3	167	143	27	Direct
1357	GO:0006979	GO:0071236	GO:0006979	GO:0071236	0.3885081707978631	Direct		3	167	144	26	Direct
1358	GO:0006979	R-HSA-3299685	GO:0006979	R-HSA-3299685	0.31697742885414876	Direct		3	167	48	122	Direct
1359	GO:0006979	GO:0098869	GO:0006979	GO:0098869	0.40346445326784164	Direct		3	167	49	121	Direct
1360	GO:0006979	GO:0042542	GO:0006979	GO:0042542	0.5108065366382905	Direct		3	167	145	25	Direct
1361	GO:0006979	GO:0046677	GO:0006979	GO:0046677	0.47152619590116884	Direct		3	167	146	24	Direct
1362	GO:0006979	WP408	GO:0006979	WP408	0.36956521739339565	Direct		3	167	18	152	Direct
1363	GO:0006979	GO:0034614	GO:0006979	GO:0034614	0.6314760508319343	Direct		3	167	147	23	Direct
1364	GO:0006979	GO:0009636	GO:0006979	GO:0009636	0.6578395385429934	Direct		3	167	148	22	Direct
1365	GO:0006979	GO:0097237	GO:0006979	GO:0097237	0.7157707157714503	Direct		3	167	149	21	Direct
1366	GO:0006979	GO:0034599	GO:0006979	GO:0034599	0.8267918088741486	Direct		3	167	150	20	Direct
1368	GO:0045664	GO:0050768	GO:0045664	GO:0050768	0.49913644214287756	Direct		5	165	106	64	Direct
1369	GO:0045664	GO:0045665	GO:0045664	GO:0045665	0.5141093474439236	Direct		5	165	107	63	Direct
1370	GO:0045664	GO:0060322	GO:0045664	GO:0060322	0.3095238095251715	Direct		5	165	108	62	Direct
1371	GO:0045664	GO:0051961	GO:0045664	GO:0051961	0.47097844112896714	Direct		5	165	109	61	Direct
1372	GO:0045664	GO:0045666	GO:0045664	GO:0045666	0.705007824726804	Direct		5	165	134	36	Direct
1373	GO:0045664	GO:0120035	GO:0045664	GO:0120035	0.8280632411070479	Direct		5	165	137	33	Direct
1374	GO:0045664	GO:0120039	GO:0045664	GO:0120039	0.7282463186082919	Direct		5	165	138	32	Direct
1375	GO:0045664	GO:0048812	GO:0045664	GO:0048812	0.7282463186082919	Direct		5	165	139	31	Direct
1376	GO:0045664	GO:0048858	GO:0045664	GO:0048858	0.7134387351784132	Direct		5	165	141	29	Direct
1377	GO:0045664	GO:0051129	GO:0045664	GO:0051129	0.3351920693940071	Direct		5	165	8	162	Direct
1379	GO:0010638	GO:0032271	GO:0010638	GO:0032271	0.40173724213000545	Direct		7	163	30	140	Direct
1380	GO:0010638	GO:0051493	GO:0010638	GO:0051493	0.5766423357675436	Direct		7	163	31	139	Direct
1381	GO:0010638	GO:0032970	GO:0010638	GO:0032970	0.4035259549478252	Direct		7	163	32	138	Direct
1382	GO:0010638	GO:0097435	GO:0010638	GO:0097435	0.46655518394778167	Direct		7	163	33	137	Direct
1383	GO:0010638	GO:0043254	GO:0010638	GO:0043254	0.36496350365131547	Direct		7	163	34	136	Direct
1384	GO:0010638	GO:1902903	GO:0010638	GO:1902903	0.5396825396837859	Direct		7	163	36	134	Direct
1385	GO:0010638	GO:0051495	GO:0010638	GO:0051495	0.6506024096395717	Direct		7	163	37	133	Direct
1386	GO:0010638	GO:1902905	GO:0010638	GO:1902905	0.5923694779128337	Direct		7	163	38	132	Direct
1387	GO:0051129	GO:0060322	GO:0051129	GO:0060322	0.34039469283214135	Direct		8	162	108	62	Direct
1388	GO:0051129	GO:0051961	GO:0051129	GO:0051961	0.4118442401311838	Direct		8	162	109	61	Direct
1389	GO:0051129	GO:0120035	GO:0051129	GO:0120035	0.36077795786181743	Direct		8	162	137	33	Direct
1398	GO:0098662	ko04260	GO:0098662	ko04260	0.36459246275358725	Direct		10	160	99	71	Direct
1399	GO:0098662	hsa04260	GO:0098662	hsa04260	0.35260446479840646	Direct		10	160	100	70	Direct
1400	GO:0098662	GO:1902600	GO:0098662	GO:1902600	0.5854949708850203	Direct		10	160	133	37	Direct
1401	GO:0098662	R-HSA-163200	GO:0098662	R-HSA-163200	0.3193741371389604	Direct		10	160	163	7	Direct
1402	GO:0098662	hsa05016	GO:0098662	hsa05016	0.3436714165980111	Direct		10	160	167	3	Direct
1403	GO:0098662	ko00190	GO:0098662	ko00190	0.42879782658025095	Direct		10	160	168	2	Direct
1404	GO:0098662	ko05016	GO:0098662	ko05016	0.3522654754319582	Direct		10	160	20	150	Direct
1405	GO:0021700	GO:1903429	GO:0021700	GO:1903429	0.30570902394477595	Direct		11	159	85	85	Direct
1406	GO:0021700	GO:0071695	GO:0021700	GO:0071695	0.7104136947230237	Direct		11	159	89	81	Direct
1407	GO:0021700	GO:2000172	GO:0021700	GO:2000172	0.30570902394477595	Direct		11	159	90	80	Direct
1408	GO:0021700	GO:0045666	GO:0021700	GO:0045666	0.3319926873878654	Direct		11	159	134	36	Direct
1409	GO:0021700	GO:0048755	GO:0021700	GO:0048755	0.388758782204519	Direct		11	159	91	79	Direct
1410	GO:0021700	GO:0022604	GO:0021700	GO:0022604	0.34414945919557743	Direct		11	159	135	35	Direct
1411	GO:0021700	GO:0120039	GO:0021700	GO:0120039	0.3435867672680528	Direct		11	159	138	32	Direct
1412	GO:0021700	GO:0048812	GO:0021700	GO:0048812	0.3435867672680528	Direct		11	159	139	31	Direct
1413	GO:0021700	GO:0032990	GO:0021700	GO:0032990	0.3336170212782405	Direct		11	159	140	30	Direct
1414	GO:0021700	GO:0048858	GO:0021700	GO:0048858	0.3336170212782405	Direct		11	159	141	29	Direct
1415	GO:0021700	GO:0045664	GO:0021700	GO:0045664	0.3062200956953843	Direct		11	159	5	165	Direct
1416	GO:0016049	GO:0045927	GO:0016049	GO:0045927	0.5520082389302771	Direct		13	157	110	60	Direct
1417	GO:0016049	GO:0045926	GO:0016049	GO:0045926	0.5520082389302771	Direct		13	157	111	59	Direct
1418	GO:0016049	GO:0030308	GO:0016049	GO:0030308	0.5708245243142124	Direct		13	157	112	58	Direct
1419	GO:0016049	GO:0030307	GO:0016049	GO:0030307	0.5708245243142124	Direct		13	157	113	57	Direct
1420	GO:0016049	GO:0040008	GO:0016049	GO:0040008	0.8657407407410411	Direct		13	157	114	56	Direct
1421	GO:0016049	GO:0022604	GO:0016049	GO:0022604	0.35872235872388214	Direct		13	157	135	35	Direct
1422	GO:0016049	GO:0031344	GO:0016049	GO:0031344	0.3442742523719195	Direct		13	157	136	34	Direct
1423	GO:0016049	GO:0120035	GO:0016049	GO:0120035	0.3442742523719195	Direct		13	157	137	33	Direct
1424	GO:0016049	GO:0120039	GO:0016049	GO:0120039	0.3967310549790112	Direct		13	157	138	32	Direct
1425	GO:0016049	GO:0048812	GO:0016049	GO:0048812	0.3967310549790112	Direct		13	157	139	31	Direct
1426	GO:0016049	GO:0032990	GO:0016049	GO:0032990	0.3865791393156666	Direct		13	157	140	30	Direct
1427	GO:0016049	GO:0048858	GO:0016049	GO:0048858	0.3865791393156666	Direct		13	157	141	29	Direct
1428	GO:0016049	GO:0045664	GO:0016049	GO:0045664	0.35822959889478667	Direct		13	157	5	165	Direct
1432	R-HSA-5628897	WP4922	R-HSA-5628897	WP4922	0.6167400881081745	Direct		16	154	97	73	Direct
1433	R-HSA-5628897	ko04260	R-HSA-5628897	ko04260	0.40485074627187667	Direct		16	154	99	71	Direct
1434	R-HSA-5628897	hsa04260	R-HSA-5628897	hsa04260	0.38224852071324	Direct		16	154	100	70	Direct
1435	CORUM:2920	CORUM:2948	CORUM:2920	CORUM:2948	0.49455337691270373	Direct		17	153	74	96	Direct
1436	CORUM:2920	GO:0022900	CORUM:2920	GO:0022900	0.31697742885414876	Direct		17	153	162	8	Direct
1437	CORUM:2920	R-HSA-163200	CORUM:2920	R-HSA-163200	0.3552746294706227	Direct		17	153	163	7	Direct
1438	CORUM:2920	ko00190	CORUM:2920	ko00190	0.3416018499078109	Direct		17	153	168	2	Direct
1439	CORUM:2920	GO:0006119	CORUM:2920	GO:0006119	0.3288672350815427	Direct		17	153	169	1	Direct
1440	WP408	ko00480	WP408	ko00480	0.5944055944097081	Direct		18	152	44	126	Direct
1441	R-HSA-1852241	R-HSA-9646399	R-HSA-1852241	R-HSA-9646399	0.3178142612133965	Direct		19	151	116	54	Direct
1442	R-HSA-1852241	R-HSA-391251	R-HSA-1852241	R-HSA-391251	0.3493180818326707	Direct		19	151	121	49	Direct
1443	R-HSA-1852241	R-HSA-389960	R-HSA-1852241	R-HSA-389960	0.40308747856172195	Direct		19	151	122	48	Direct
1444	R-HSA-1852241	R-HSA-389958	R-HSA-1852241	R-HSA-389958	0.3838526912206618	Direct		19	151	123	47	Direct
1445	R-HSA-1852241	R-HSA-389957	R-HSA-1852241	R-HSA-389957	0.3838526912206618	Direct		19	151	124	46	Direct
1483	GO:0032271	GO:0051493	GO:0032271	GO:0051493	0.6276747503581734	Direct		30	140	31	139	Direct
1484	GO:0032271	GO:0032970	GO:0032271	GO:0032970	0.5311236863401132	Direct		30	140	32	138	Direct
1485	GO:0032271	GO:0097435	GO:0032271	GO:0097435	0.5351418002482713	Direct		30	140	33	137	Direct
1486	GO:0032271	GO:0043254	GO:0032271	GO:0043254	0.7104136947230237	Direct		30	140	34	136	Direct
1487	GO:0032271	GO:1902903	GO:0032271	GO:1902903	0.6555308092071254	Direct		30	140	36	134	Direct
1488	GO:0032271	GO:0051495	GO:0032271	GO:0051495	0.6565143824043923	Direct		30	140	37	133	Direct
1489	GO:0032271	GO:1902905	GO:0032271	GO:1902905	0.6565143824043923	Direct		30	140	38	132	Direct
1490	GO:0051493	GO:0097435	GO:0051493	GO:0097435	0.7072678331098743	Direct		31	139	33	137	Direct
1491	GO:0051493	GO:1902903	GO:0051493	GO:1902903	0.8311990686850869	Direct		31	139	36	134	Direct
1492	GO:0051493	GO:0051495	GO:0051493	GO:0051495	0.851282051282604	Direct		31	139	37	133	Direct
1493	GO:0051493	GO:1902905	GO:0051493	GO:1902905	0.776923076923906	Direct		31	139	38	132	Direct
1494	GO:0051493	GO:0120035	GO:0051493	GO:0120035	0.3336170212782405	Direct		31	139	137	33	Direct
1495	GO:0032970	GO:0051493	GO:0032970	GO:0051493	0.7482430756520009	Direct		32	138	31	139	Direct
1496	GO:0032970	GO:0097435	GO:0032970	GO:0097435	0.5873768697568735	Direct		32	138	33	137	Direct
1497	GO:0032970	GO:0043254	GO:0032970	GO:0043254	0.38859032658343073	Direct		32	138	34	136	Direct
1498	GO:0032970	GO:1902903	GO:0032970	GO:1902903	0.7023733162294584	Direct		32	138	36	134	Direct
1499	GO:0032970	GO:0051495	GO:0032970	GO:0051495	0.6266094420616354	Direct		32	138	37	133	Direct
1500	GO:0032970	GO:1902905	GO:0032970	GO:1902905	0.6266094420616354	Direct		32	138	38	132	Direct
1501	GO:0097435	GO:1902903	GO:0097435	GO:1902903	0.8497409326429385	Direct		33	137	36	134	Direct
1502	GO:0097435	GO:1902905	GO:0097435	GO:1902905	0.7387387387395922	Direct		33	137	38	132	Direct
1503	GO:0043254	GO:0051493	GO:0043254	GO:0051493	0.4759036144595479	Direct		34	136	31	139	Direct
1504	GO:0043254	GO:0097435	GO:0043254	GO:0097435	0.4145356662197488	Direct		34	136	33	137	Direct
1505	GO:0043254	GO:1902903	GO:0043254	GO:1902903	0.49359720605526075	Direct		34	136	36	134	Direct
1506	GO:0043254	GO:0051495	GO:0043254	GO:0051495	0.4794871794891143	Direct		34	136	37	133	Direct
1507	GO:0043254	GO:1902905	GO:0043254	GO:1902905	0.4794871794891143	Direct		34	136	38	132	Direct
1508	GO:0031112	GO:0032271	GO:0031112	GO:0032271	0.45283018868352276	Direct		35	135	30	140	Direct
1509	GO:0031112	GO:0051493	GO:0031112	GO:0051493	0.388758782204519	Direct		35	135	31	139	Direct
1510	GO:0031112	GO:0097435	GO:0031112	GO:0097435	0.3203125000028882	Direct		35	135	33	137	Direct
1511	GO:0031112	GO:1902903	GO:0031112	GO:1902903	0.4103512014819032	Direct		35	135	36	134	Direct
1512	GO:0031112	GO:0051495	GO:0031112	GO:0051495	0.49122807017867404	Direct		35	135	37	133	Direct
1513	GO:0031112	GO:1902905	GO:0031112	GO:1902905	0.49122807017867404	Direct		35	135	38	132	Direct
1514	GO:1902903	GO:1902905	GO:1902903	GO:1902905	0.8844621513948673	Direct		36	134	38	132	Direct
1515	GO:0051495	GO:0097435	GO:0051495	GO:0097435	0.6734234234244902	Direct		37	133	33	137	Direct
1516	GO:0051495	GO:1902903	GO:0051495	GO:1902903	0.8074369189914454	Direct		37	133	36	134	Direct
1517	GO:0051495	hsa05130	GO:0051495	hsa05130	0.31764705882741023	Direct		37	133	118	52	Direct
1518	GO:0051495	ko05130	GO:0051495	ko05130	0.31764705882741023	Direct		37	133	119	51	Direct
1519	GO:0051495	WP2272	GO:0051495	WP2272	0.31764705882741023	Direct		37	133	120	50	Direct
1520	GO:0051495	GO:1902905	GO:0051495	GO:1902905	0.9136904761908485	Direct		37	133	38	132	Direct
1521	GO:0051495	GO:0120035	GO:0051495	GO:0120035	0.32683379758769887	Direct		37	133	137	33	Direct
1522	GO:1902905	hsa05130	GO:1902905	hsa05130	0.31764705882741023	Direct		38	132	118	52	Direct
1523	GO:1902905	ko05130	GO:1902905	ko05130	0.31764705882741023	Direct		38	132	119	51	Direct
1524	GO:1902905	WP2272	GO:1902905	WP2272	0.31764705882741023	Direct		38	132	120	50	Direct
1534	GO:0042744	GO:0098754	GO:0042744	GO:0098754	0.5396825396867786	Direct		43	127	46	124	Direct
1535	GO:0042744	GO:1990748	GO:0042744	GO:1990748	0.5396825396867786	Direct		43	127	47	123	Direct
1536	GO:0042744	R-HSA-3299685	GO:0042744	R-HSA-3299685	0.49455337691270373	Direct		43	127	48	122	Direct
1537	GO:0042744	GO:0098869	GO:0042744	GO:0098869	0.5396825396867786	Direct		43	127	49	121	Direct
1538	GO:0042744	WP15	GO:0042744	WP15	0.5396825396867786	Direct		43	127	50	120	Direct
1539	GO:0042744	GO:0045454	GO:0042744	GO:0045454	0.43798449613034673	Direct		43	127	51	119	Direct
1540	GO:0042744	GO:0097237	GO:0042744	GO:0097237	0.30570902394477595	Direct		43	127	149	21	Direct
1541	GO:0033194	GO:0042744	GO:0033194	GO:0042744	0.32753623189536185	Direct		45	125	43	127	Direct
1542	GO:0033194	ko00480	GO:0033194	ko00480	0.5671641791107215	Direct		45	125	44	126	Direct
1543	GO:0033194	GO:0043534	GO:0033194	GO:0043534	0.32459970888488815	Direct		45	125	66	104	Direct
1544	GO:0033194	GO:0098754	GO:0033194	GO:0098754	0.35555555556149004	Direct		45	125	46	124	Direct
1545	GO:0033194	GO:1990748	GO:0033194	GO:1990748	0.35555555556149004	Direct		45	125	47	123	Direct
1546	GO:0033194	GO:0098869	GO:0033194	GO:0098869	0.35555555556149004	Direct		45	125	49	121	Direct
1547	GO:0033194	WP408	GO:0033194	WP408	0.6627906976782081	Direct		45	125	18	152	Direct
1548	GO:0098754	ko00480	GO:0098754	ko00480	0.6614785992246541	Direct		46	124	44	126	Direct
1549	GO:0098754	GO:1990748	GO:0098754	GO:1990748	1.0	Direct		46	124	47	123	Direct
1550	GO:0098754	R-HSA-3299685	GO:0098754	R-HSA-3299685	0.608460846087674	Direct		46	124	48	122	Direct
1551	GO:0098754	GO:0098869	GO:0098754	GO:0098869	1.0	Direct		46	124	49	121	Direct
1552	GO:0098754	WP15	GO:0098754	WP15	0.7441176470604606	Direct		46	124	50	120	Direct
1553	GO:0098754	WP408	GO:0098754	WP408	0.4170854271399255	Direct		46	124	18	152	Direct
1554	GO:1990748	ko00480	GO:1990748	ko00480	0.6614785992246541	Direct		47	123	44	126	Direct
1555	GO:1990748	R-HSA-3299685	GO:1990748	R-HSA-3299685	0.608460846087674	Direct		47	123	48	122	Direct
1556	GO:1990748	WP15	GO:1990748	WP15	0.7441176470604606	Direct		47	123	50	120	Direct
1557	GO:1990748	WP408	GO:1990748	WP408	0.4170854271399255	Direct		47	123	18	152	Direct
1558	R-HSA-3299685	ko00480	R-HSA-3299685	ko00480	0.6623544631344597	Direct		48	122	44	126	Direct
1559	R-HSA-3299685	WP15	R-HSA-3299685	WP15	0.4518451845227437	Direct		48	122	50	120	Direct
1560	R-HSA-3299685	WP408	R-HSA-3299685	WP408	0.5382165605138197	Direct		48	122	18	152	Direct
1561	GO:0098869	ko00480	GO:0098869	ko00480	0.6614785992246541	Direct		49	121	44	126	Direct
1562	GO:0098869	GO:1990748	GO:0098869	GO:1990748	1.0	Direct		49	121	47	123	Direct
1563	GO:0098869	R-HSA-3299685	GO:0098869	R-HSA-3299685	0.608460846087674	Direct		49	121	48	122	Direct
1564	GO:0098869	WP15	GO:0098869	WP15	0.7441176470604606	Direct		49	121	50	120	Direct
1565	GO:0098869	WP408	GO:0098869	WP408	0.4170854271399255	Direct		49	121	18	152	Direct
1566	WP15	ko00480	WP15	ko00480	0.3229571984493083	Direct		50	120	44	126	Direct
1567	GO:0045454	ko00480	GO:0045454	ko00480	0.3916083916145622	Direct		51	119	44	126	Direct
1568	GO:0045454	GO:0098754	GO:0045454	GO:0098754	0.5628140703549441	Direct		51	119	46	124	Direct
1569	GO:0045454	GO:1990748	GO:0045454	GO:1990748	0.5628140703549441	Direct		51	119	47	123	Direct
1570	GO:0045454	R-HSA-3299685	GO:0045454	R-HSA-3299685	0.7229299363082918	Direct		51	119	48	122	Direct
1571	GO:0045454	GO:0098869	GO:0045454	GO:0098869	0.5628140703549441	Direct		51	119	49	121	Direct
1572	GO:0045454	WP15	GO:0045454	WP15	0.5628140703549441	Direct		51	119	50	120	Direct
1573	GO:0045454	WP408	GO:0045454	WP408	0.4912280701797532	Direct		51	119	18	152	Direct
1574	GO:0045454	GO:0097237	GO:0045454	GO:0097237	0.3472668810319819	Direct		51	119	149	21	Direct
1575	GO:0035188	GO:0071684	GO:0035188	GO:0071684	1.0	Direct		53	117	52	118	Direct
1576	GO:0001835	GO:0071684	GO:0001835	GO:0071684	1.0	Direct		54	116	52	118	Direct
1577	GO:0001835	GO:0035188	GO:0001835	GO:0035188	1.0	Direct		54	116	53	117	Direct
1578	GO:0001824	GO:0071684	GO:0001824	GO:0071684	0.6627906976782081	Direct		55	115	52	118	Direct
1579	GO:0001824	GO:0035188	GO:0001824	GO:0035188	0.6627906976782081	Direct		55	115	53	117	Direct
1580	GO:0001824	GO:0001835	GO:0001824	GO:0001835	0.6627906976782081	Direct		55	115	54	116	Direct
1581	GO:0001824	GO:0009792	GO:0001824	GO:0009792	0.39731051344956925	Direct		55	115	57	113	Direct
1582	GO:0001824	GO:0043009	GO:0001824	GO:0043009	0.39731051344956925	Direct		55	115	12	158	Direct
1583	GO:0001701	GO:0071684	GO:0001701	GO:0071684	0.34362139918087153	Direct		56	114	52	118	Direct
1584	GO:0001701	GO:0035188	GO:0001701	GO:0035188	0.34362139918087153	Direct		56	114	53	117	Direct
1585	GO:0001701	GO:0001835	GO:0001701	GO:0001835	0.34362139918087153	Direct		56	114	54	116	Direct
1586	GO:0001701	GO:0001824	GO:0001701	GO:0001824	0.5901060070692381	Direct		56	114	55	115	Direct
1587	GO:0001701	GO:0009792	GO:0001701	GO:0009792	0.743950294310735	Direct		56	114	57	113	Direct
1588	GO:0001701	GO:0043009	GO:0001701	GO:0043009	0.743950294310735	Direct		56	114	12	158	Direct
1589	GO:0009792	GO:0043009	GO:0009792	GO:0043009	1.0	Direct		57	113	12	158	Direct
1590	GO:0072358	GO:0090130	GO:0072358	GO:0090130	0.5066454013837645	Direct		58	112	62	108	Direct
1591	GO:0072358	GO:0090132	GO:0072358	GO:0090132	0.5066454013837645	Direct		58	112	64	106	Direct
1592	GO:0072358	WP3888	GO:0072358	WP3888	0.4557640750684348	Direct		58	112	14	156	Direct
1593	GO:0001944	GO:0072358	GO:0001944	GO:0072358	1.0	Direct		59	111	58	112	Direct
1594	GO:0001944	GO:0045746	GO:0001944	GO:0045746	0.30661040787905897	Direct		59	111	61	109	Direct
1595	GO:0001944	GO:0090130	GO:0001944	GO:0090130	0.5066454013837645	Direct		59	111	62	108	Direct
1596	GO:0001944	GO:0002042	GO:0001944	GO:0002042	0.42913385826988926	Direct		59	111	63	107	Direct
1597	GO:0001944	GO:0090132	GO:0001944	GO:0090132	0.5066454013837645	Direct		59	111	64	106	Direct
1598	GO:0001944	GO:0010631	GO:0001944	GO:0010631	0.5066454013837645	Direct		59	111	65	105	Direct
1599	GO:0001944	GO:0043534	GO:0001944	GO:0043534	0.5849731663699503	Direct		59	111	66	104	Direct
1600	GO:0001944	WP3888	GO:0001944	WP3888	0.4557640750684348	Direct		59	111	14	156	Direct
1601	GO:0001944	GO:0006979	GO:0001944	GO:0006979	0.3485760128374561	Direct		59	111	3	167	Direct
1602	GO:0001667	GO:0072358	GO:0001667	GO:0072358	0.47352496218005696	Direct		60	110	58	112	Direct
1603	GO:0001667	GO:0001944	GO:0001667	GO:0001944	0.47352496218005696	Direct		60	110	59	111	Direct
1604	GO:0001667	GO:0090130	GO:0001667	GO:0090130	0.9255933290573646	Direct		60	110	62	108	Direct
1605	GO:0001667	GO:0002042	GO:0001667	GO:0002042	0.5606060606082057	Direct		60	110	63	107	Direct
1606	GO:0001667	GO:0090132	GO:0001667	GO:0090132	0.9255933290573646	Direct		60	110	64	106	Direct
1607	GO:0001667	GO:0010631	GO:0001667	GO:0010631	0.9255933290573646	Direct		60	110	65	105	Direct
1608	GO:0001667	GO:0010721	GO:0001667	GO:0010721	0.3452855245709144	Direct		60	110	101	69	Direct
1609	GO:0001667	GO:0043534	GO:0001667	GO:0043534	0.741648106905344	Direct		60	110	66	104	Direct
1610	GO:0001667	GO:0050768	GO:0001667	GO:0050768	0.3452855245709144	Direct		60	110	106	64	Direct
1611	GO:0001667	GO:0051961	GO:0001667	GO:0051961	0.31637717121834086	Direct		60	110	109	61	Direct
1612	GO:0001667	WP3888	GO:0001667	WP3888	0.30880829015751765	Direct		60	110	14	156	Direct
1613	GO:0045746	GO:0072358	GO:0045746	GO:0072358	0.30661040787905897	Direct		61	109	58	112	Direct
1614	GO:0045746	WP3888	GO:0045746	WP3888	0.3203125000028882	Direct		61	109	14	156	Direct
1615	GO:0090130	GO:0090132	GO:0090130	GO:0090132	1.0	Direct		62	108	64	106	Direct
1616	GO:0090130	WP3888	GO:0090130	WP3888	0.3334549434534112	Direct		62	108	14	156	Direct
1617	GO:0002042	GO:0072358	GO:0002042	GO:0072358	0.42913385826988926	Direct		63	107	58	112	Direct
1618	GO:0002042	GO:0045746	GO:0002042	GO:0045746	0.3916083916145622	Direct		63	107	61	109	Direct
1619	GO:0002042	GO:0090130	GO:0002042	GO:0090130	0.6226765799276848	Direct		63	107	62	108	Direct
1620	GO:0002042	GO:0090132	GO:0002042	GO:0090132	0.6226765799276848	Direct		63	107	64	106	Direct
1621	GO:0002042	GO:0010631	GO:0002042	GO:0010631	0.6226765799276848	Direct		63	107	65	105	Direct
1622	GO:0002042	GO:0043534	GO:0002042	GO:0043534	0.795774647888714	Direct		63	107	66	104	Direct
1623	GO:0002042	hsa05130	GO:0002042	hsa05130	0.32163742690633756	Direct		63	107	118	52	Direct
1624	GO:0002042	ko05130	GO:0002042	ko05130	0.32163742690633756	Direct		63	107	119	51	Direct
1625	GO:0002042	WP2272	GO:0002042	WP2272	0.32163742690633756	Direct		63	107	120	50	Direct
1626	GO:0002042	WP3888	GO:0002042	WP3888	0.3678474114466397	Direct		63	107	14	156	Direct
1627	GO:0002042	GO:0034614	GO:0002042	GO:0034614	0.31764705882741023	Direct		63	107	147	23	Direct
1628	GO:0090132	WP3888	GO:0090132	WP3888	0.3334549434534112	Direct		64	106	14	156	Direct
1629	GO:0010631	GO:0072358	GO:0010631	GO:0072358	0.5066454013837645	Direct		65	105	58	112	Direct
1630	GO:0010631	GO:0090130	GO:0010631	GO:0090130	1.0	Direct		65	105	62	108	Direct
1631	GO:0010631	GO:0090132	GO:0010631	GO:0090132	1.0	Direct		65	105	64	106	Direct
1632	GO:0010631	GO:0043534	GO:0010631	GO:0043534	0.8124494745360452	Direct		65	105	66	104	Direct
1633	GO:0010631	WP3888	GO:0010631	WP3888	0.3334549434534112	Direct		65	105	14	156	Direct
1634	GO:0043534	GO:0072358	GO:0043534	GO:0072358	0.5849731663699503	Direct		66	104	58	112	Direct
1635	GO:0043534	GO:0097435	GO:0043534	GO:0097435	0.32059186190131955	Direct		66	104	33	137	Direct
1636	GO:0043534	GO:0090130	GO:0043534	GO:0090130	0.8124494745360452	Direct		66	104	62	108	Direct
1637	GO:0043534	GO:0090132	GO:0043534	GO:0090132	0.8124494745360452	Direct		66	104	64	106	Direct
1638	GO:0043534	GO:1902903	GO:0043534	GO:1902903	0.3110616184142507	Direct		66	104	36	134	Direct
1639	GO:0043534	GO:1902905	GO:0043534	GO:1902905	0.36209813875101426	Direct		66	104	38	132	Direct
1640	GO:0043534	WP3888	GO:0043534	WP3888	0.3921085080169701	Direct		66	104	14	156	Direct
1664	CORUM:2905	CORUM:2948	CORUM:2905	CORUM:2948	0.6637681159476809	Direct		75	95	74	96	Direct
1665	CORUM:2905	CORUM:2920	CORUM:2905	CORUM:2920	0.7472766884563519	Direct		75	95	17	153	Direct
1666	CORUM:2904	CORUM:2948	CORUM:2904	CORUM:2948	0.6637681159476809	Direct		76	94	74	96	Direct
1667	CORUM:2904	CORUM:2905	CORUM:2904	CORUM:2905	1.0	Direct		76	94	75	95	Direct
1668	CORUM:2904	CORUM:2920	CORUM:2904	CORUM:2920	0.7472766884563519	Direct		76	94	17	153	Direct
1707	GO:1903429	GO:2000172	GO:1903429	GO:2000172	1.0	Direct		85	85	90	80	Direct
1708	GO:0060688	GO:0060993	GO:0060688	GO:0060993	0.3912536443210453	Direct		86	84	84	86	Direct
1709	GO:0060688	GO:1903429	GO:0060688	GO:1903429	0.7472766884563519	Direct		86	84	85	85	Direct
1710	GO:0060688	GO:0071695	GO:0060688	GO:0071695	0.41781681305317014	Direct		86	84	89	81	Direct
1711	GO:0060688	GO:0070301	GO:0060688	GO:0070301	0.3219678519297587	Direct		86	84	143	27	Direct
1712	GO:0060688	GO:2000172	GO:0060688	GO:2000172	0.7472766884563519	Direct		86	84	90	80	Direct
1713	GO:0001763	GO:0060993	GO:0001763	GO:0060993	0.5242187500032341	Direct		87	83	84	86	Direct
1714	GO:0001763	GO:1903429	GO:0001763	GO:1903429	0.45430107527307206	Direct		87	83	85	85	Direct
1715	GO:0001763	GO:0010721	GO:0001763	GO:0010721	0.3430420712004943	Direct		87	83	101	69	Direct
1716	GO:0001763	GO:0060688	GO:0001763	GO:0060688	0.6601562500023102	Direct		87	83	86	84	Direct
1717	GO:0001763	GO:0050768	GO:0001763	GO:0050768	0.3430420712004943	Direct		87	83	106	64	Direct
1718	GO:0001763	GO:0014041	GO:0001763	GO:0014041	0.45430107527307206	Direct		87	83	88	82	Direct
1719	GO:0001763	GO:0071695	GO:0001763	GO:0071695	0.5130597014951718	Direct		87	83	89	81	Direct
1720	GO:0001763	GO:0045665	GO:0001763	GO:0045665	0.36173814898733203	Direct		87	83	107	63	Direct
1721	GO:0001763	GO:0060322	GO:0001763	GO:0060322	0.3147260273993019	Direct		87	83	108	62	Direct
1722	GO:0001763	GO:0051961	GO:0001763	GO:0051961	0.31020812686124954	Direct		87	83	109	61	Direct
1723	GO:0001763	GO:2000172	GO:0001763	GO:2000172	0.45430107527307206	Direct		87	83	90	80	Direct
1724	GO:0001763	GO:0009792	GO:0001763	GO:0009792	0.3370827285942553	Direct		87	83	57	113	Direct
1725	GO:0001763	GO:0048755	GO:0001763	GO:0048755	0.5642737896525796	Direct		87	83	91	79	Direct
1726	GO:0001763	GO:0043009	GO:0001763	GO:0043009	0.3370827285942553	Direct		87	83	12	158	Direct
1727	GO:0001763	GO:0021700	GO:0001763	GO:0021700	0.3620531622390239	Direct		87	83	11	159	Direct
1728	GO:0014041	GO:1903429	GO:0014041	GO:1903429	1.0	Direct		88	82	85	85	Direct
1729	GO:0014041	GO:0031345	GO:0014041	GO:0031345	0.32459970888488815	Direct		88	82	102	68	Direct
1730	GO:0014041	GO:0060688	GO:0014041	GO:0060688	0.7472766884563519	Direct		88	82	86	84	Direct
1731	GO:0014041	GO:0071695	GO:0014041	GO:0071695	0.4934497816636661	Direct		88	82	89	81	Direct
1732	GO:0014041	GO:2000172	GO:0014041	GO:2000172	1.0	Direct		88	82	90	80	Direct
1733	GO:0014041	GO:0048755	GO:0014041	GO:0048755	0.8557213930369072	Direct		88	82	91	79	Direct
1734	GO:0014041	GO:0021700	GO:0014041	GO:0021700	0.30570902394477595	Direct		88	82	11	159	Direct
1735	GO:0071695	GO:1903429	GO:0071695	GO:1903429	0.4934497816636661	Direct		89	81	85	85	Direct
1736	GO:0071695	GO:2000172	GO:0071695	GO:2000172	0.4934497816636661	Direct		89	81	90	80	Direct
1737	GO:0048755	GO:1903429	GO:0048755	GO:1903429	0.8557213930369072	Direct		91	79	85	85	Direct
1738	GO:0048755	GO:0060688	GO:0048755	GO:0060688	0.6623544631344597	Direct		91	79	86	84	Direct
1739	GO:0048755	GO:0071695	GO:0048755	GO:0071695	0.6091644204882305	Direct		91	79	89	81	Direct
1740	GO:0048755	GO:2000172	GO:0048755	GO:2000172	0.8557213930369072	Direct		91	79	90	80	Direct
1741	GO:0009060	WP678	GO:0009060	WP678	0.39267015707420866	Direct		93	77	94	76	Direct
1742	GO:0009060	GO:0019646	GO:0009060	GO:0019646	0.8304919629824397	Direct		93	77	95	75	Direct
1743	GO:0009060	WP4922	GO:0009060	WP4922	0.6081081081111798	Direct		93	77	97	73	Direct
1744	GO:0009060	ko04260	GO:0009060	ko04260	0.6163175303221883	Direct		93	77	99	71	Direct
1745	GO:0009060	GO:0015672	GO:0009060	GO:0015672	0.3673938002317276	Direct		93	77	130	40	Direct
1746	GO:0009060	hsa04260	GO:0009060	hsa04260	0.5782548476479705	Direct		93	77	100	70	Direct
1747	GO:0009060	R-HSA-5628897	GO:0009060	R-HSA-5628897	0.45775623269024773	Direct		93	77	16	154	Direct
1748	GO:0009060	GO:1902600	GO:0009060	GO:1902600	0.5596175478086792	Direct		93	77	133	37	Direct
1749	GO:0009060	R-HSA-163200	GO:0009060	R-HSA-163200	0.3242027800514636	Direct		93	77	163	7	Direct
1750	GO:0009060	hsa05016	GO:0009060	hsa05016	0.3210044112676986	Direct		93	77	167	3	Direct
1751	GO:0009060	ko00190	GO:0009060	ko00190	0.3809053172585037	Direct		93	77	168	2	Direct
1752	GO:0009060	ko05016	GO:0009060	ko05016	0.33158721844100364	Direct		93	77	20	150	Direct
1753	WP678	ko04260	WP678	ko04260	0.32459970888488815	Direct		94	76	99	71	Direct
1754	GO:0019646	WP678	GO:0019646	WP678	0.49455337691270373	Direct		95	75	94	76	Direct
1755	GO:0019646	WP4922	GO:0019646	WP4922	0.7229299363082918	Direct		95	75	97	73	Direct
1756	GO:0019646	R-HSA-3700989	GO:0019646	R-HSA-3700989	0.332822085892538	Direct		95	75	98	72	Direct
1757	GO:0019646	ko04260	GO:0019646	ko04260	0.708908406526585	Direct		95	75	99	71	Direct
1758	GO:0019646	hsa04260	GO:0019646	hsa04260	0.6601562500023102	Direct		95	75	100	70	Direct
1759	GO:0019646	R-HSA-5628897	GO:0019646	R-HSA-5628897	0.5242187500032341	Direct		95	75	16	154	Direct
1760	GO:0019646	GO:1902600	GO:0019646	GO:1902600	0.516069221263418	Direct		95	75	133	37	Direct
1761	GO:0019646	GO:0022900	GO:0019646	GO:0022900	0.31697742885414876	Direct		95	75	162	8	Direct
1762	GO:0019646	ko00190	GO:0019646	ko00190	0.3416018499078109	Direct		95	75	168	2	Direct
1763	GO:0006123	GO:0009060	GO:0006123	GO:0009060	0.8304919629824397	Direct		96	74	93	77	Direct
1764	GO:0006123	WP678	GO:0006123	WP678	0.49455337691270373	Direct		96	74	94	76	Direct
1765	GO:0006123	GO:0019646	GO:0006123	GO:0019646	1.0	Direct		96	74	95	75	Direct
1766	GO:0006123	WP4922	GO:0006123	WP4922	0.7229299363082918	Direct		96	74	97	73	Direct
1767	GO:0006123	R-HSA-3700989	GO:0006123	R-HSA-3700989	0.332822085892538	Direct		96	74	98	72	Direct
1768	GO:0006123	ko04260	GO:0006123	ko04260	0.708908406526585	Direct		96	74	99	71	Direct
1769	GO:0006123	GO:0015672	GO:0006123	GO:0015672	0.3288672350815427	Direct		96	74	130	40	Direct
1770	GO:0006123	hsa04260	GO:0006123	hsa04260	0.6601562500023102	Direct		96	74	100	70	Direct
1771	GO:0006123	R-HSA-5628897	GO:0006123	R-HSA-5628897	0.5242187500032341	Direct		96	74	16	154	Direct
1772	GO:0006123	GO:1902600	GO:0006123	GO:1902600	0.516069221263418	Direct		96	74	133	37	Direct
1773	GO:0006123	GO:0022900	GO:0006123	GO:0022900	0.31697742885414876	Direct		96	74	162	8	Direct
1774	GO:0006123	ko00190	GO:0006123	ko00190	0.3416018499078109	Direct		96	74	168	2	Direct
1775	WP4922	WP678	WP4922	WP678	0.43798449613034673	Direct		97	73	94	76	Direct
1776	WP4922	ko04260	WP4922	ko04260	0.6596244131478567	Direct		97	73	99	71	Direct
1777	WP4922	hsa04260	WP4922	hsa04260	0.6167400881081745	Direct		97	73	100	70	Direct
1778	WP4922	ko00190	WP4922	ko00190	0.326405867973048	Direct		97	73	168	2	Direct
1779	R-HSA-3700989	WP4922	R-HSA-3700989	WP4922	0.4011799410055105	Direct		98	72	97	73	Direct
1780	R-HSA-3700989	R-HSA-5628897	R-HSA-3700989	R-HSA-5628897	0.7033248081852433	Direct		98	72	16	154	Direct
1781	ko04260	ko05016	ko04260	ko05016	0.3642252117606818	Direct		99	71	20	150	Direct
1782	hsa04260	ko04260	hsa04260	ko04260	0.9458955223883524	Direct		100	70	99	71	Direct
1783	hsa04260	hsa05016	hsa04260	hsa05016	0.3954516740383008	Direct		100	70	167	3	Direct
1784	hsa04260	ko00190	hsa04260	ko00190	0.4002177068233738	Direct		100	70	168	2	Direct
1785	hsa04260	ko05016	hsa04260	ko05016	0.3511673151769274	Direct		100	70	20	150	Direct
1786	GO:0010721	GO:0060993	GO:0010721	GO:0060993	0.3395445134615216	Direct		101	69	84	86	Direct
1787	GO:0010721	GO:0031345	GO:0010721	GO:0031345	0.7546531302888517	Direct		101	69	102	68	Direct
1788	GO:0010721	GO:0010977	GO:0010721	GO:0010977	0.7943262411358093	Direct		101	69	103	67	Direct
1789	GO:0010721	GO:0045596	GO:0010721	GO:0045596	0.6921443736739837	Direct		101	69	105	65	Direct
1790	GO:0010721	GO:0045926	GO:0010721	GO:0045926	0.3255813953518694	Direct		101	69	111	59	Direct
1791	GO:0010721	GO:0060688	GO:0010721	GO:0060688	0.3395445134615216	Direct		101	69	86	84	Direct
1792	GO:0010721	GO:0050768	GO:0010721	GO:0050768	1.0	Direct		101	69	106	64	Direct
1793	GO:0010721	GO:0045665	GO:0010721	GO:0045665	0.9550387596901246	Direct		101	69	107	63	Direct
1794	GO:0010721	GO:0060322	GO:0010721	GO:0060322	0.3479960899334222	Direct		101	69	108	62	Direct
1795	GO:0010721	GO:0051961	GO:0010721	GO:0051961	0.9201101928377847	Direct		101	69	109	61	Direct
1796	GO:0010721	GO:0022604	GO:0010721	GO:0022604	0.3344262295103065	Direct		101	69	135	35	Direct
1797	GO:0010721	GO:0031344	GO:0010721	GO:0031344	0.38068709378068294	Direct		101	69	136	34	Direct
1798	GO:0010721	GO:0120035	GO:0010721	GO:0120035	0.38068709378068294	Direct		101	69	137	33	Direct
1799	GO:0010721	GO:0120039	GO:0010721	GO:0120039	0.33714285714468767	Direct		101	69	138	32	Direct
1800	GO:0010721	GO:0048812	GO:0010721	GO:0048812	0.33714285714468767	Direct		101	69	139	31	Direct
1801	GO:0010721	GO:0032990	GO:0010721	GO:0032990	0.32683379758769887	Direct		101	69	140	30	Direct
1802	GO:0010721	GO:0048858	GO:0010721	GO:0048858	0.32683379758769887	Direct		101	69	141	29	Direct
1803	GO:0010721	GO:0051129	GO:0010721	GO:0051129	0.38818565400993643	Direct		101	69	8	162	Direct
1804	GO:0010721	GO:0010975	GO:0010721	GO:0010975	0.4176706827326196	Direct		101	69	142	28	Direct
1805	GO:0010721	GO:0045664	GO:0010721	GO:0045664	0.49913644214287756	Direct		101	69	5	165	Direct
1806	GO:0031345	GO:1903429	GO:0031345	GO:1903429	0.32459970888488815	Direct		102	68	85	85	Direct
1807	GO:0031345	GO:0045596	GO:0031345	GO:0045596	0.4976905311795117	Direct		102	68	105	65	Direct
1808	GO:0031345	GO:0050768	GO:0031345	GO:0050768	0.7546531302888517	Direct		102	68	106	64	Direct
1809	GO:0031345	GO:0071695	GO:0031345	GO:0071695	0.3156342182929889	Direct		102	68	89	81	Direct
1810	GO:0031345	GO:0045665	GO:0031345	GO:0045665	0.7941437444553627	Direct		102	68	107	63	Direct
1811	GO:0031345	GO:0051961	GO:0031345	GO:0051961	0.6857585139332993	Direct		102	68	109	61	Direct
1812	GO:0031345	GO:2000172	GO:0031345	GO:2000172	0.32459970888488815	Direct		102	68	90	80	Direct
1813	GO:0031345	GO:0120035	GO:0031345	GO:0120035	0.4798206278041941	Direct		102	68	137	33	Direct
1814	GO:0031345	GO:0120039	GO:0031345	GO:0120039	0.31659836065776786	Direct		102	68	138	32	Direct
1815	GO:0031345	GO:0048812	GO:0031345	GO:0048812	0.31659836065776786	Direct		102	68	139	31	Direct
1816	GO:0031345	GO:0032990	GO:0031345	GO:0032990	0.3064275037389256	Direct		102	68	140	30	Direct
1817	GO:0031345	GO:0048858	GO:0031345	GO:0048858	0.3064275037389256	Direct		102	68	141	29	Direct
1818	GO:0031345	GO:0051129	GO:0031345	GO:0051129	0.42703188145636384	Direct		102	68	8	162	Direct
1819	GO:0031345	GO:0045664	GO:0031345	GO:0045664	0.38581952118027707	Direct		102	68	5	165	Direct
1820	GO:0010977	GO:1903429	GO:0010977	GO:1903429	0.35555555556149004	Direct		103	67	85	85	Direct
1821	GO:0010977	GO:0031345	GO:0010977	GO:0031345	0.9397089397093034	Direct		103	67	102	68	Direct
1822	GO:0010977	GO:0045596	GO:0010977	GO:0045596	0.5170499603505957	Direct		103	67	105	65	Direct
1823	GO:0010977	GO:0050768	GO:0010977	GO:0050768	0.7943262411358093	Direct		103	67	106	64	Direct
1824	GO:0010977	GO:0014041	GO:0010977	GO:0014041	0.35555555556149004	Direct		103	67	88	82	Direct
1825	GO:0010977	GO:0071695	GO:0010977	GO:0071695	0.3367983368023361	Direct		103	67	89	81	Direct
1826	GO:0010977	GO:0030308	GO:0010977	GO:0030308	0.3158584534770339	Direct		103	67	112	58	Direct
1827	GO:0010977	GO:0045665	GO:0010977	GO:0045665	0.8377874456192735	Direct		103	67	107	63	Direct
1828	GO:0010977	GO:0051961	GO:0010977	GO:0051961	0.7190527448882909	Direct		103	67	109	61	Direct
1829	GO:0010977	GO:2000172	GO:0010977	GO:2000172	0.35555555556149004	Direct		103	67	90	80	Direct
1830	GO:0010977	GO:0048755	GO:0010977	GO:0048755	0.3229571984493083	Direct		103	67	91	79	Direct
1831	GO:0010977	GO:0022604	GO:0010977	GO:0022604	0.3936039360415236	Direct		103	67	135	35	Direct
1832	GO:0010977	GO:0031344	GO:0010977	GO:0031344	0.43718079673302573	Direct		103	67	136	34	Direct
1833	GO:0010977	GO:0120035	GO:0010977	GO:0120035	0.43718079673302573	Direct		103	67	137	33	Direct
1834	GO:0010977	GO:0120039	GO:0010977	GO:0120039	0.3293622985304254	Direct		103	67	138	32	Direct
1835	GO:0010977	GO:0048812	GO:0010977	GO:0048812	0.3293622985304254	Direct		103	67	139	31	Direct
1836	GO:0010977	GO:0032990	GO:0010977	GO:0032990	0.3186925434136627	Direct		103	67	140	30	Direct
1837	GO:0010977	GO:0048858	GO:0010977	GO:0048858	0.3186925434136627	Direct		103	67	141	29	Direct
1838	GO:0010977	GO:0051129	GO:0010977	GO:0051129	0.38788620373365684	Direct		103	67	8	162	Direct
1839	GO:0010977	GO:0045664	GO:0010977	GO:0045664	0.399246704333091	Direct		103	67	5	165	Direct
1840	GO:0007420	GO:0010721	GO:0007420	GO:0010721	0.3344262295103065	Direct		104	66	101	69	Direct
1841	GO:0007420	GO:0031345	GO:0007420	GO:0031345	0.30828861061658386	Direct		104	66	102	68	Direct
1842	GO:0007420	GO:0050768	GO:0007420	GO:0050768	0.3344262295103065	Direct		104	66	106	64	Direct
1843	GO:0007420	GO:0045665	GO:0007420	GO:0045665	0.34794828555580737	Direct		104	66	107	63	Direct
1844	GO:0007420	GO:0060322	GO:0007420	GO:0060322	0.9069394304053509	Direct		104	66	108	62	Direct
1845	GO:0007420	GO:0051961	GO:0007420	GO:0051961	0.42960662526051174	Direct		104	66	109	61	Direct
1846	GO:0007420	GO:0045664	GO:0007420	GO:0045664	0.30349344978312903	Direct		104	66	5	165	Direct
1847	GO:0045596	GO:0050768	GO:0045596	GO:0050768	0.6921443736739837	Direct		105	65	106	64	Direct
1848	GO:0045596	GO:0045665	GO:0045596	GO:0045665	0.6520000000011008	Direct		105	65	107	63	Direct
1849	GO:0045596	GO:0051961	GO:0045596	GO:0051961	0.6494291470796004	Direct		105	65	109	61	Direct
1850	GO:0045596	GO:0120035	GO:0045596	GO:0120035	0.31996974281541035	Direct		105	65	137	33	Direct
1851	GO:0045596	GO:0051129	GO:0045596	GO:0051129	0.32763466042291556	Direct		105	65	8	162	Direct
1852	GO:0045596	GO:0045664	GO:0045596	GO:0045664	0.5021459227478137	Direct		105	65	5	165	Direct
1853	GO:0050768	GO:0060993	GO:0050768	GO:0060993	0.3395445134615216	Direct		106	64	84	86	Direct
1854	GO:0050768	GO:0060688	GO:0050768	GO:0060688	0.3395445134615216	Direct		106	64	86	84	Direct
1855	GO:0050768	GO:0060322	GO:0050768	GO:0060322	0.3479960899334222	Direct		106	64	108	62	Direct
1856	GO:0050768	GO:0051961	GO:0050768	GO:0051961	0.9201101928377847	Direct		106	64	109	61	Direct
1857	GO:0050768	GO:0120035	GO:0050768	GO:0120035	0.38068709378068294	Direct		106	64	137	33	Direct
1858	GO:0050768	GO:0120039	GO:0050768	GO:0120039	0.33714285714468767	Direct		106	64	138	32	Direct
1859	GO:0050768	GO:0051129	GO:0050768	GO:0051129	0.38818565400993643	Direct		106	64	8	162	Direct
1860	GO:0045665	GO:0060993	GO:0045665	GO:0060993	0.362403810923817	Direct		107	63	84	86	Direct
1861	GO:0045665	GO:0060688	GO:0045665	GO:0060688	0.362403810923817	Direct		107	63	86	84	Direct
1862	GO:0045665	GO:0050768	GO:0045665	GO:0050768	0.9550387596901246	Direct		107	63	106	64	Direct
1863	GO:0045665	GO:0060322	GO:0045665	GO:0060322	0.36082818500770103	Direct		107	63	108	62	Direct
1864	GO:0045665	GO:0051961	GO:0045665	GO:0051961	0.8755958055295913	Direct		107	63	109	61	Direct
1865	GO:0045665	GO:0120035	GO:0045665	GO:0120035	0.3938242280301739	Direct		107	63	137	33	Direct
1866	GO:0045665	GO:0120039	GO:0045665	GO:0120039	0.34947984395502596	Direct		107	63	138	32	Direct
1867	GO:0045665	GO:0048812	GO:0045665	GO:0048812	0.34947984395502596	Direct		107	63	139	31	Direct
1868	GO:0045665	GO:0048858	GO:0045665	GO:0048858	0.33871733966928064	Direct		107	63	141	29	Direct
1869	GO:0045665	GO:0051129	GO:0045665	GO:0051129	0.4006028419707811	Direct		107	63	8	162	Direct
1870	GO:0051961	GO:0060993	GO:0051961	GO:0060993	0.3009888751582705	Direct		109	61	84	86	Direct
1871	GO:0051961	GO:0060688	GO:0051961	GO:0060688	0.3009888751582705	Direct		109	61	86	84	Direct
1872	GO:0051961	GO:0060322	GO:0051961	GO:0060322	0.43225605966592295	Direct		109	61	108	62	Direct
1873	GO:0051961	GO:0120035	GO:0051961	GO:0120035	0.35612788632492676	Direct		109	61	137	33	Direct
1874	GO:0051961	GO:0120039	GO:0051961	GO:0120039	0.3668890236523678	Direct		109	61	138	32	Direct
1875	GO:0045926	GO:0050768	GO:0045926	GO:0050768	0.3255813953518694	Direct		111	59	106	64	Direct
1876	GO:0030308	GO:0045926	GO:0030308	GO:0045926	0.9509029345374871	Direct		112	58	111	59	Direct
1877	GO:0030308	GO:0040008	GO:0030308	GO:0040008	0.5708245243142124	Direct		112	58	114	56	Direct
1878	GO:0030307	GO:0045927	GO:0030307	GO:0045927	0.9509029345374871	Direct		113	57	110	60	Direct
1879	GO:0030307	GO:0045666	GO:0030307	GO:0045666	0.34673144876576184	Direct		113	57	134	36	Direct
1880	GO:0030307	GO:0040008	GO:0030307	GO:0040008	0.5708245243142124	Direct		113	57	114	56	Direct
1881	GO:0040008	GO:0045927	GO:0040008	GO:0045927	0.6117404737395734	Direct		114	56	110	60	Direct
1882	GO:0040008	GO:0045926	GO:0040008	GO:0045926	0.6117404737395734	Direct		114	56	111	59	Direct
1883	GO:0040008	GO:0120035	GO:0040008	GO:0120035	0.3442742523719195	Direct		114	56	137	33	Direct
1884	GO:0040008	GO:0120039	GO:0040008	GO:0120039	0.31054977711887	Direct		114	56	138	32	Direct
1885	GO:0040008	GO:0048812	GO:0040008	GO:0048812	0.31054977711887	Direct		114	56	139	31	Direct
1886	GO:0040008	GO:0048858	GO:0040008	GO:0048858	0.30196936542817243	Direct		114	56	141	29	Direct
1887	GO:0040008	GO:0045664	GO:0040008	GO:0045664	0.3181189488257109	Direct		114	56	5	165	Direct
1888	GO:0001558	GO:0045927	GO:0001558	GO:0045927	0.6087689713334844	Direct		115	55	110	60	Direct
1889	GO:0001558	GO:0045926	GO:0001558	GO:0045926	0.6087689713334844	Direct		115	55	111	59	Direct
1890	GO:0001558	GO:0030308	GO:0001558	GO:0030308	0.6307870370382764	Direct		115	55	112	58	Direct
1891	GO:0001558	GO:0030307	GO:0001558	GO:0030307	0.6307870370382764	Direct		115	55	113	57	Direct
1892	GO:0001558	GO:0040008	GO:0001558	GO:0040008	0.9287469287470981	Direct		115	55	114	56	Direct
1893	GO:0001558	GO:0022604	GO:0001558	GO:0022604	0.3918741808665473	Direct		115	55	135	35	Direct
1894	GO:0001558	GO:0031344	GO:0001558	GO:0031344	0.37418111753511735	Direct		115	55	136	34	Direct
1895	GO:0001558	GO:0120035	GO:0001558	GO:0120035	0.37418111753511735	Direct		115	55	137	33	Direct
1896	GO:0001558	GO:0120039	GO:0001558	GO:0120039	0.33883647798892913	Direct		115	55	138	32	Direct
1897	GO:0001558	GO:0048812	GO:0001558	GO:0048812	0.33883647798892913	Direct		115	55	139	31	Direct
1898	GO:0001558	GO:0032990	GO:0001558	GO:0032990	0.3294797687876258	Direct		115	55	140	30	Direct
1899	GO:0001558	GO:0048858	GO:0001558	GO:0048858	0.3294797687876258	Direct		115	55	141	29	Direct
1900	GO:0001558	GO:0010975	GO:0001558	GO:0010975	0.4062244062258168	Direct		115	55	142	28	Direct
1901	GO:0001558	GO:0016049	GO:0001558	GO:0016049	0.9287469287470981	Direct		115	55	13	157	Direct
1902	GO:0001558	GO:0045664	GO:0001558	GO:0045664	0.3457059679780909	Direct		115	55	5	165	Direct
1903	R-HSA-9646399	hsa05130	R-HSA-9646399	hsa05130	0.5382165605138197	Direct		116	54	118	52	Direct
1904	R-HSA-9646399	ko05130	R-HSA-9646399	ko05130	0.5382165605138197	Direct		116	54	119	51	Direct
1905	R-HSA-9646399	WP2272	R-HSA-9646399	WP2272	0.5382165605138197	Direct		116	54	120	50	Direct
1906	R-HSA-389977	R-HSA-9646399	R-HSA-389977	R-HSA-9646399	0.6623544631344597	Direct		117	53	116	54	Direct
1907	R-HSA-389977	hsa05130	R-HSA-389977	hsa05130	0.5944055944097081	Direct		117	53	118	52	Direct
1908	R-HSA-389977	ko05130	R-HSA-389977	ko05130	0.5944055944097081	Direct		117	53	119	51	Direct
1909	R-HSA-389977	WP2272	R-HSA-389977	WP2272	0.5944055944097081	Direct		117	53	120	50	Direct
1910	R-HSA-389977	R-HSA-391251	R-HSA-389977	R-HSA-391251	0.6614785992246541	Direct		117	53	121	49	Direct
1911	hsa05130	ko05130	hsa05130	ko05130	1.0	Direct		118	52	119	51	Direct
1912	WP2272	hsa05130	WP2272	hsa05130	1.0	Direct		120	50	118	52	Direct
1913	WP2272	ko05130	WP2272	ko05130	1.0	Direct		120	50	119	51	Direct
1914	R-HSA-391251	R-HSA-9646399	R-HSA-391251	R-HSA-9646399	0.4518451845227437	Direct		121	49	116	54	Direct
1915	R-HSA-391251	hsa05130	R-HSA-391251	hsa05130	0.4170854271399255	Direct		121	49	118	52	Direct
1916	R-HSA-391251	ko05130	R-HSA-391251	ko05130	0.4170854271399255	Direct		121	49	119	51	Direct
1917	R-HSA-391251	WP2272	R-HSA-391251	WP2272	0.4170854271399255	Direct		121	49	120	50	Direct
1918	R-HSA-389960	R-HSA-9646399	R-HSA-389960	R-HSA-9646399	0.5941690962140302	Direct		122	48	116	54	Direct
1919	R-HSA-389960	R-HSA-389977	R-HSA-389960	R-HSA-389977	0.6623544631344597	Direct		122	48	117	53	Direct
1920	R-HSA-389960	hsa05130	R-HSA-389960	hsa05130	0.5382165605138197	Direct		122	48	118	52	Direct
1921	R-HSA-389960	ko05130	R-HSA-389960	ko05130	0.5382165605138197	Direct		122	48	119	51	Direct
1922	R-HSA-389960	WP2272	R-HSA-389960	WP2272	0.5382165605138197	Direct		122	48	120	50	Direct
1923	R-HSA-389960	R-HSA-391251	R-HSA-389960	R-HSA-391251	0.7650765076526045	Direct		122	48	121	49	Direct
1924	R-HSA-389958	R-HSA-9646399	R-HSA-389958	R-HSA-9646399	0.5382165605138197	Direct		123	47	116	54	Direct
1925	R-HSA-389958	R-HSA-389977	R-HSA-389958	R-HSA-389977	0.5944055944097081	Direct		123	47	117	53	Direct
1926	R-HSA-389958	hsa05130	R-HSA-389958	hsa05130	0.4912280701797532	Direct		123	47	118	52	Direct
1927	R-HSA-389958	ko05130	R-HSA-389958	ko05130	0.4912280701797532	Direct		123	47	119	51	Direct
1928	R-HSA-389958	WP2272	R-HSA-389958	WP2272	0.4912280701797532	Direct		123	47	120	50	Direct
1929	R-HSA-389958	R-HSA-391251	R-HSA-389958	R-HSA-391251	0.8542713567849813	Direct		123	47	121	49	Direct
1930	R-HSA-389958	R-HSA-389960	R-HSA-389958	R-HSA-389960	0.9076433121027639	Direct		123	47	122	48	Direct
1931	R-HSA-389957	R-HSA-9646399	R-HSA-389957	R-HSA-9646399	0.5382165605138197	Direct		124	46	116	54	Direct
1932	R-HSA-389957	R-HSA-389977	R-HSA-389957	R-HSA-389977	0.5944055944097081	Direct		124	46	117	53	Direct
1933	R-HSA-389957	hsa05130	R-HSA-389957	hsa05130	0.4912280701797532	Direct		124	46	118	52	Direct
1934	R-HSA-389957	ko05130	R-HSA-389957	ko05130	0.4912280701797532	Direct		124	46	119	51	Direct
1935	R-HSA-389957	WP2272	R-HSA-389957	WP2272	0.4912280701797532	Direct		124	46	120	50	Direct
1936	R-HSA-389957	R-HSA-391251	R-HSA-389957	R-HSA-391251	0.8542713567849813	Direct		124	46	121	49	Direct
1937	R-HSA-389957	R-HSA-389960	R-HSA-389957	R-HSA-389960	0.9076433121027639	Direct		124	46	122	48	Direct
1938	R-HSA-389957	R-HSA-389958	R-HSA-389957	R-HSA-389958	1.0	Direct		124	46	123	47	Direct
1939	GO:0009168	GO:0015986	GO:0009168	GO:0015986	0.6226765799276848	Direct		125	45	126	44	Direct
1940	GO:0009168	GO:0015985	GO:0009168	GO:0015985	0.6226765799276848	Direct		125	45	127	43	Direct
1941	GO:0009168	GO:1990542	GO:0009168	GO:1990542	0.48227126209000964	Direct		125	45	129	41	Direct
1942	GO:0009168	GO:0042776	GO:0009168	GO:0042776	0.6226765799276848	Direct		125	45	131	39	Direct
1943	GO:0009168	R-HSA-163210	GO:0009168	R-HSA-163210	0.6226765799276848	Direct		125	45	132	38	Direct
1944	GO:0009168	GO:1902600	GO:0009168	GO:1902600	0.42205491585696575	Direct		125	45	133	37	Direct
1945	GO:0009168	R-HSA-1852241	GO:0009168	R-HSA-1852241	0.41138883668675846	Direct		125	45	19	151	Direct
1946	GO:0009168	R-HSA-163200	GO:0009168	R-HSA-163200	0.3104755341164711	Direct		125	45	163	7	Direct
1947	GO:0009168	GO:0009205	GO:0009168	GO:0009205	0.5405940594069959	Direct		125	45	164	6	Direct
1948	GO:0009168	GO:0046034	GO:0009168	GO:0046034	0.5540868626932502	Direct		125	45	165	5	Direct
1949	GO:0015986	GO:1990542	GO:0015986	GO:1990542	0.6991701244831383	Direct		126	44	129	41	Direct
1950	GO:0015986	GO:0042776	GO:0015986	GO:0042776	1.0	Direct		126	44	131	39	Direct
1951	GO:0015986	R-HSA-163210	GO:0015986	R-HSA-163210	1.0	Direct		126	44	132	38	Direct
1952	GO:0015986	GO:1902600	GO:0015986	GO:1902600	0.5901060070692381	Direct		126	44	133	37	Direct
1953	GO:0015986	R-HSA-1852241	GO:0015986	R-HSA-1852241	0.4660056657245736	Direct		126	44	19	151	Direct
1954	GO:0015986	R-HSA-163200	GO:0015986	R-HSA-163200	0.4126582278502573	Direct		126	44	163	7	Direct
1955	GO:0015986	ko00190	GO:0015986	ko00190	0.39731051344956925	Direct		126	44	168	2	Direct
1956	GO:0015985	GO:0015986	GO:0015985	GO:0015986	1.0	Direct		127	43	126	44	Direct
1957	GO:0015985	GO:1990542	GO:0015985	GO:1990542	0.6991701244831383	Direct		127	43	129	41	Direct
1958	GO:0015985	GO:0042776	GO:0015985	GO:0042776	1.0	Direct		127	43	131	39	Direct
1959	GO:0015985	R-HSA-163210	GO:0015985	R-HSA-163210	1.0	Direct		127	43	132	38	Direct
1960	GO:0015985	GO:1902600	GO:0015985	GO:1902600	0.5901060070692381	Direct		127	43	133	37	Direct
1961	GO:0015985	R-HSA-1852241	GO:0015985	R-HSA-1852241	0.4660056657245736	Direct		127	43	19	151	Direct
1962	GO:0015985	R-HSA-163200	GO:0015985	R-HSA-163200	0.4126582278502573	Direct		127	43	163	7	Direct
1963	GO:0015985	ko00190	GO:0015985	ko00190	0.39731051344956925	Direct		127	43	168	2	Direct
1964	GO:0007007	GO:0009168	GO:0007007	GO:0009168	0.5588732394387819	Direct		128	42	125	45	Direct
1965	GO:0007007	GO:0015986	GO:0007007	GO:0015986	0.8542713567849813	Direct		128	42	126	44	Direct
1966	GO:0007007	GO:0015985	GO:0007007	GO:0015985	0.8542713567849813	Direct		128	42	127	43	Direct
1967	GO:0007007	GO:1990542	GO:0007007	GO:1990542	0.8377874456192735	Direct		128	42	129	41	Direct
1968	GO:0007007	GO:0015672	GO:0007007	GO:0015672	0.35267857143066605	Direct		128	42	130	40	Direct
1969	GO:0007007	GO:0042776	GO:0007007	GO:0042776	0.8542713567849813	Direct		128	42	131	39	Direct
1970	GO:0007007	R-HSA-163210	GO:0007007	R-HSA-163210	0.8542713567849813	Direct		128	42	132	38	Direct
1971	GO:0007007	GO:1902600	GO:0007007	GO:1902600	0.531754574813818	Direct		128	42	133	37	Direct
1972	GO:0007007	R-HSA-1852241	GO:0007007	R-HSA-1852241	0.42586889573470943	Direct		128	42	19	151	Direct
1973	GO:0007007	R-HSA-163200	GO:0007007	R-HSA-163200	0.3790642347364802	Direct		128	42	163	7	Direct
1974	GO:0007007	ko00190	GO:0007007	ko00190	0.36545105566430786	Direct		128	42	168	2	Direct
1975	GO:1990542	R-HSA-163210	GO:1990542	R-HSA-163210	0.6991701244831383	Direct		129	41	132	38	Direct
1976	GO:1990542	R-HSA-1852241	GO:1990542	R-HSA-1852241	0.37497505488143534	Direct		129	41	19	151	Direct
1977	GO:1990542	R-HSA-163200	GO:1990542	R-HSA-163200	0.33563636363846516	Direct		129	41	163	7	Direct
1978	GO:1990542	ko00190	GO:1990542	ko00190	0.3240331979536925	Direct		129	41	168	2	Direct
1979	GO:0015672	GO:0019646	GO:0015672	GO:0019646	0.3288672350815427	Direct		130	40	95	75	Direct
1980	GO:0015672	WP4922	GO:0015672	WP4922	0.3144208037848556	Direct		130	40	97	73	Direct
1981	GO:0015672	GO:0015986	GO:0015672	GO:0015986	0.38297872340637007	Direct		130	40	126	44	Direct
1982	GO:0015672	GO:0015985	GO:0015672	GO:0015985	0.38297872340637007	Direct		130	40	127	43	Direct
1983	GO:0015672	ko04260	GO:0015672	ko04260	0.40173724213000545	Direct		130	40	99	71	Direct
1984	GO:0015672	GO:1990542	GO:0015672	GO:1990542	0.3130792996930916	Direct		130	40	129	41	Direct
1985	GO:0015672	hsa04260	GO:0015672	hsa04260	0.386892177591732	Direct		130	40	100	70	Direct
1986	GO:0015672	GO:0042776	GO:0015672	GO:0042776	0.38297872340637007	Direct		130	40	131	39	Direct
1987	GO:0015672	R-HSA-163210	GO:0015672	R-HSA-163210	0.38297872340637007	Direct		130	40	132	38	Direct
1988	GO:0015672	GO:1902600	GO:0015672	GO:1902600	0.7227533460810747	Direct		130	40	133	37	Direct
1989	GO:0015672	GO:0098662	GO:0015672	GO:0098662	0.8061497326206967	Direct		130	40	10	160	Direct
1990	GO:0015672	R-HSA-163200	GO:0015672	R-HSA-163200	0.3948635634042975	Direct		130	40	163	7	Direct
1991	GO:0015672	GO:0046034	GO:0015672	GO:0046034	0.41844919786209006	Direct		130	40	165	5	Direct
1992	GO:0015672	hsa05016	GO:0015672	hsa05016	0.376790830946853	Direct		130	40	167	3	Direct
1993	GO:0015672	ko00190	GO:0015672	ko00190	0.5208497246273719	Direct		130	40	168	2	Direct
1994	GO:0015672	ko05016	GO:0015672	ko05016	0.3865791393156666	Direct		130	40	20	150	Direct
1995	GO:0042776	GO:1990542	GO:0042776	GO:1990542	0.6991701244831383	Direct		131	39	129	41	Direct
1996	GO:0042776	R-HSA-163210	GO:0042776	R-HSA-163210	1.0	Direct		131	39	132	38	Direct
1997	GO:0042776	GO:1902600	GO:0042776	GO:1902600	0.5901060070692381	Direct		131	39	133	37	Direct
1998	GO:0042776	R-HSA-1852241	GO:0042776	R-HSA-1852241	0.4660056657245736	Direct		131	39	19	151	Direct
1999	GO:0042776	R-HSA-163200	GO:0042776	R-HSA-163200	0.4126582278502573	Direct		131	39	163	7	Direct
2000	GO:0042776	ko00190	GO:0042776	ko00190	0.39731051344956925	Direct		131	39	168	2	Direct
2001	R-HSA-163210	R-HSA-1852241	R-HSA-163210	R-HSA-1852241	0.4660056657245736	Direct		132	38	19	151	Direct
2002	R-HSA-163210	ko00190	R-HSA-163210	ko00190	0.39731051344956925	Direct		132	38	168	2	Direct
2003	GO:1902600	WP4922	GO:1902600	WP4922	0.48763250883654763	Direct		133	37	97	73	Direct
2004	GO:1902600	ko04260	GO:1902600	ko04260	0.5061919504666132	Direct		133	37	99	71	Direct
2005	GO:1902600	GO:1990542	GO:1902600	GO:1990542	0.46091515729489535	Direct		133	37	129	41	Direct
2006	GO:1902600	hsa04260	GO:1902600	hsa04260	0.4826560951459372	Direct		133	37	100	70	Direct
2007	GO:1902600	R-HSA-5628897	GO:1902600	R-HSA-5628897	0.31020812686124954	Direct		133	37	16	154	Direct
2008	GO:1902600	R-HSA-163210	GO:1902600	R-HSA-163210	0.5901060070692381	Direct		133	37	132	38	Direct
2009	GO:1902600	R-HSA-1852241	GO:1902600	R-HSA-1852241	0.3327246165105208	Direct		133	37	19	151	Direct
2010	GO:1902600	R-HSA-163200	GO:1902600	R-HSA-163200	0.5325721961061339	Direct		133	37	163	7	Direct
2011	GO:1902600	hsa05016	GO:1902600	hsa05016	0.4968189705044472	Direct		133	37	167	3	Direct
2012	GO:1902600	ko00190	GO:1902600	ko00190	0.6870503597131206	Direct		133	37	168	2	Direct
2013	GO:1902600	ko05016	GO:1902600	ko05016	0.5106571936069443	Direct		133	37	20	150	Direct
2014	GO:0045666	GO:0045927	GO:0045666	GO:0045927	0.33148345784666694	Direct		134	36	110	60	Direct
2015	GO:0045666	GO:0120035	GO:0045666	GO:0120035	0.6131721550655457	Direct		134	36	137	33	Direct
2016	GO:0045666	GO:0120039	GO:0045666	GO:0120039	0.5798295454555836	Direct		134	36	138	32	Direct
2017	GO:0045666	GO:0048812	GO:0045666	GO:0048812	0.5798295454555836	Direct		134	36	139	31	Direct
2018	GO:0045666	GO:0048858	GO:0045666	GO:0048858	0.5648186744487389	Direct		134	36	141	29	Direct
2019	GO:0022604	GO:0031345	GO:0022604	GO:0031345	0.3774597495549255	Direct		135	35	102	68	Direct
2020	GO:0022604	GO:0050768	GO:0022604	GO:0050768	0.3344262295103065	Direct		135	35	106	64	Direct
2021	GO:0022604	GO:0045665	GO:0022604	GO:0045665	0.34794828555580737	Direct		135	35	107	63	Direct
2022	GO:0022604	GO:0051961	GO:0022604	GO:0051961	0.30952380952588265	Direct		135	35	109	61	Direct
2023	GO:0022604	GO:0045666	GO:0022604	GO:0045666	0.5549160671475208	Direct		135	35	134	36	Direct
2024	GO:0022604	GO:0040008	GO:0022604	GO:0040008	0.35872235872388214	Direct		135	35	114	56	Direct
2025	GO:0022604	GO:0031344	GO:0022604	GO:0031344	0.7317919075150503	Direct		135	35	136	34	Direct
2026	GO:0022604	GO:0120035	GO:0022604	GO:0120035	0.7317919075150503	Direct		135	35	137	33	Direct
2027	GO:0022604	GO:0120039	GO:0022604	GO:0120039	0.7492138364785593	Direct		135	35	138	32	Direct
2028	GO:0022604	GO:0048812	GO:0022604	GO:0048812	0.7492138364785593	Direct		135	35	139	31	Direct
2029	GO:0022604	GO:0032990	GO:0022604	GO:0032990	0.7317919075150503	Direct		135	35	140	30	Direct
2030	GO:0022604	GO:0048858	GO:0022604	GO:0048858	0.7317919075150503	Direct		135	35	141	29	Direct
2031	GO:0022604	GO:0045664	GO:0022604	GO:0045664	0.6834061135377859	Direct		135	35	5	165	Direct
2032	GO:0031344	GO:0051493	GO:0031344	GO:0051493	0.3336170212782405	Direct		136	34	31	139	Direct
2033	GO:0031344	GO:0031345	GO:0031344	GO:0031345	0.4798206278041941	Direct		136	34	102	68	Direct
2034	GO:0031344	GO:0045596	GO:0031344	GO:0045596	0.31996974281541035	Direct		136	34	105	65	Direct
2035	GO:0031344	GO:0050768	GO:0031344	GO:0050768	0.38068709378068294	Direct		136	34	106	64	Direct
2036	GO:0031344	GO:0045665	GO:0031344	GO:0045665	0.3938242280301739	Direct		136	34	107	63	Direct
2037	GO:0031344	GO:0051495	GO:0031344	GO:0051495	0.32683379758769887	Direct		136	34	37	133	Direct
2038	GO:0031344	GO:0051961	GO:0031344	GO:0051961	0.35612788632492676	Direct		136	34	109	61	Direct
2039	GO:0031344	GO:0045666	GO:0031344	GO:0045666	0.6131721550655457	Direct		136	34	134	36	Direct
2040	GO:0031344	GO:0040008	GO:0031344	GO:0040008	0.3442742523719195	Direct		136	34	114	56	Direct
2041	GO:0031344	GO:0120035	GO:0031344	GO:0120035	1.0	Direct		136	34	137	33	Direct
2042	GO:0031344	GO:0120039	GO:0031344	GO:0120039	0.6936619718316115	Direct		136	34	138	32	Direct
2043	GO:0031344	GO:0048812	GO:0031344	GO:0048812	0.6936619718316115	Direct		136	34	139	31	Direct
2044	GO:0031344	GO:0032990	GO:0031344	GO:0032990	0.6787815853242863	Direct		136	34	140	30	Direct
2045	GO:0031344	GO:0048858	GO:0031344	GO:0048858	0.6787815853242863	Direct		136	34	141	29	Direct
2046	GO:0031344	GO:0051129	GO:0031344	GO:0051129	0.36077795786181743	Direct		136	34	8	162	Direct
2047	GO:0031344	GO:0045664	GO:0031344	GO:0045664	0.8280632411070479	Direct		136	34	5	165	Direct
2048	GO:0120035	GO:0120039	GO:0120035	GO:0120039	0.6936619718316115	Direct		137	33	138	32	Direct
2049	GO:0048812	GO:0050768	GO:0048812	GO:0050768	0.33714285714468767	Direct		139	31	106	64	Direct
2050	GO:0048812	GO:0051961	GO:0048812	GO:0051961	0.3668890236523678	Direct		139	31	109	61	Direct
2051	GO:0048812	GO:0120035	GO:0048812	GO:0120035	0.6936619718316115	Direct		139	31	137	33	Direct
2052	GO:0048812	GO:0120039	GO:0048812	GO:0120039	1.0	Direct		139	31	138	32	Direct
2053	GO:0048812	GO:0048858	GO:0048812	GO:0048858	0.979577464788774	Direct		139	31	141	29	Direct
2054	GO:0032990	GO:0050768	GO:0032990	GO:0050768	0.32683379758769887	Direct		140	30	106	64	Direct
2055	GO:0032990	GO:0045665	GO:0032990	GO:0045665	0.33871733966928064	Direct		140	30	107	63	Direct
2056	GO:0032990	GO:0051961	GO:0032990	GO:0051961	0.35612788632492676	Direct		140	30	109	61	Direct
2057	GO:0032990	GO:0045666	GO:0032990	GO:0045666	0.5648186744487389	Direct		140	30	134	36	Direct
2058	GO:0032990	GO:0040008	GO:0032990	GO:0040008	0.30196936542817243	Direct		140	30	114	56	Direct
2059	GO:0032990	GO:0120035	GO:0032990	GO:0120035	0.6787815853242863	Direct		140	30	137	33	Direct
2060	GO:0032990	GO:0120039	GO:0032990	GO:0120039	0.979577464788774	Direct		140	30	138	32	Direct
2061	GO:0032990	GO:0048812	GO:0032990	GO:0048812	0.979577464788774	Direct		140	30	139	31	Direct
2062	GO:0032990	GO:0048858	GO:0032990	GO:0048858	1.0	Direct		140	30	141	29	Direct
2063	GO:0032990	GO:0045664	GO:0032990	GO:0045664	0.7134387351784132	Direct		140	30	5	165	Direct
2064	GO:0048858	GO:0050768	GO:0048858	GO:0050768	0.32683379758769887	Direct		141	29	106	64	Direct
2065	GO:0048858	GO:0051961	GO:0048858	GO:0051961	0.35612788632492676	Direct		141	29	109	61	Direct
2066	GO:0048858	GO:0120035	GO:0048858	GO:0120035	0.6787815853242863	Direct		141	29	137	33	Direct
2067	GO:0048858	GO:0120039	GO:0048858	GO:0120039	0.979577464788774	Direct		141	29	138	32	Direct
2068	GO:0010975	GO:0031345	GO:0010975	GO:0031345	0.4647122692742154	Direct		142	28	102	68	Direct
2069	GO:0010975	GO:0010977	GO:0010975	GO:0010977	0.48214285714453287	Direct		142	28	103	67	Direct
2070	GO:0010975	GO:0045927	GO:0010975	GO:0045927	0.3130792996930916	Direct		142	28	110	60	Direct
2071	GO:0010975	GO:0045596	GO:0010975	GO:0045596	0.34831460674308967	Direct		142	28	105	65	Direct
2072	GO:0010975	GO:0050768	GO:0010975	GO:0050768	0.4176706827326196	Direct		142	28	106	64	Direct
2073	GO:0010975	GO:0045665	GO:0010975	GO:0045665	0.43254376931168437	Direct		142	28	107	63	Direct
2074	GO:0010975	GO:0030307	GO:0010975	GO:0030307	0.3255813953509052	Direct		142	28	113	57	Direct
2075	GO:0010975	GO:0051961	GO:0010975	GO:0051961	0.39005736137836433	Direct		142	28	109	61	Direct
2076	GO:0010975	GO:0045666	GO:0010975	GO:0045666	0.6636931311337868	Direct		142	28	134	36	Direct
2077	GO:0010975	GO:0040008	GO:0010975	GO:0040008	0.37345679012485855	Direct		142	28	114	56	Direct
2078	GO:0010975	GO:0022604	GO:0010975	GO:0022604	0.7862407862412941	Direct		142	28	135	35	Direct
2079	GO:0010975	GO:0031344	GO:0010975	GO:0031344	0.9365426695843793	Direct		142	28	136	34	Direct
2080	GO:0010975	GO:0120035	GO:0010975	GO:0120035	0.9365426695843793	Direct		142	28	137	33	Direct
2081	GO:0010975	GO:0120039	GO:0010975	GO:0120039	0.7414561664195762	Direct		142	28	138	32	Direct
2082	GO:0010975	GO:0048812	GO:0010975	GO:0048812	0.7414561664195762	Direct		142	28	139	31	Direct
2083	GO:0010975	GO:0021700	GO:0010975	GO:0021700	0.3120437956222584	Direct		142	28	11	159	Direct
2084	GO:0010975	GO:0032990	GO:0010975	GO:0032990	0.7250182348656437	Direct		142	28	140	30	Direct
2085	GO:0010975	GO:0048858	GO:0010975	GO:0048858	0.7250182348656437	Direct		142	28	141	29	Direct
2086	GO:0010975	GO:0051129	GO:0010975	GO:0051129	0.34942216179597996	Direct		142	28	8	162	Direct
2087	GO:0010975	GO:0016049	GO:0010975	GO:0016049	0.37345679012485855	Direct		142	28	13	157	Direct
2088	GO:0010975	GO:0045664	GO:0010975	GO:0045664	0.8796680497927725	Direct		142	28	5	165	Direct
2089	GO:0070301	GO:0071236	GO:0070301	GO:0071236	0.8721058434407294	Direct		143	27	144	26	Direct
2090	GO:0070301	GO:0097237	GO:0070301	GO:0097237	0.5974293059143972	Direct		143	27	149	21	Direct
2091	GO:0071236	GO:0097237	GO:0071236	GO:0097237	0.544935805993323	Direct		144	26	149	21	Direct
2092	GO:0042542	GO:0042744	GO:0042542	GO:0042744	0.32459970888488815	Direct		145	25	43	127	Direct
2093	GO:0042542	GO:0043534	GO:0042542	GO:0043534	0.3156342182929889	Direct		145	25	66	104	Direct
2094	GO:0042542	GO:0070301	GO:0042542	GO:0070301	0.8721058434407294	Direct		145	25	143	27	Direct
2095	GO:0042542	GO:0071236	GO:0042542	GO:0071236	0.7718780727643297	Direct		145	25	144	26	Direct
2096	GO:0042542	GO:0046677	GO:0042542	GO:0046677	0.741648106905344	Direct		145	25	146	24	Direct
2097	GO:0042542	GO:0097237	GO:0042542	GO:0097237	0.7104136947230237	Direct		145	25	149	21	Direct
2098	GO:0046677	GO:0070301	GO:0046677	GO:0070301	0.6261079774392975	Direct		146	24	143	27	Direct
2099	GO:0046677	GO:0071236	GO:0046677	GO:0071236	0.741648106905344	Direct		146	24	144	26	Direct
2100	GO:0046677	GO:0097237	GO:0046677	GO:0097237	0.6286379511071912	Direct		146	24	149	21	Direct
2101	GO:0034614	GO:0070301	GO:0034614	GO:0070301	0.729981378027529	Direct		147	23	143	27	Direct
2102	GO:0034614	GO:0071236	GO:0034614	GO:0071236	0.6565143824043923	Direct		147	23	144	26	Direct
2103	GO:0034614	GO:0042542	GO:0034614	GO:0042542	0.6565143824043923	Direct		147	23	145	25	Direct
2104	GO:0034614	GO:0046677	GO:0034614	GO:0046677	0.4993359893777581	Direct		147	23	146	24	Direct
2105	GO:0034614	GO:0097237	GO:0034614	GO:0097237	0.5538461538478122	Direct		147	23	149	21	Direct
2106	GO:0009636	GO:0098754	GO:0009636	GO:0098754	0.5170499603505957	Direct		148	22	46	124	Direct
2107	GO:0009636	GO:1990748	GO:0009636	GO:1990748	0.5170499603505957	Direct		148	22	47	123	Direct
2108	GO:0009636	GO:0070301	GO:0009636	GO:0070301	0.4664758789879976	Direct		148	22	143	27	Direct
2109	GO:0009636	GO:0071236	GO:0009636	GO:0071236	0.4307159353367799	Direct		148	22	144	26	Direct
2110	GO:0009636	GO:0098869	GO:0009636	GO:0098869	0.5170499603505957	Direct		148	22	49	121	Direct
2111	GO:0009636	GO:0042542	GO:0009636	GO:0042542	0.5646651270222434	Direct		148	22	145	25	Direct
2112	GO:0009636	WP15	GO:0009636	WP15	0.3790642347364802	Direct		148	22	50	120	Direct
2113	GO:0009636	GO:0046677	GO:0009636	GO:0046677	0.6866404715136629	Direct		148	22	146	24	Direct
2114	GO:0009636	GO:0034614	GO:0009636	GO:0034614	0.507430997878374	Direct		148	22	147	23	Direct
2115	GO:0009636	GO:0097237	GO:0009636	GO:0097237	0.8332268370611662	Direct		148	22	149	21	Direct
2116	GO:0009636	GO:0034599	GO:0009636	GO:0034599	0.6819012797083385	Direct		148	22	150	20	Direct
2117	GO:0097237	ko00480	GO:0097237	ko00480	0.388758782204519	Direct		149	21	44	126	Direct
2118	GO:0097237	GO:0098754	GO:0097237	GO:0098754	0.6561264822149172	Direct		149	21	46	124	Direct
2119	GO:0097237	GO:1990748	GO:0097237	GO:1990748	0.6561264822149172	Direct		149	21	47	123	Direct
2120	GO:0097237	R-HSA-3299685	GO:0097237	R-HSA-3299685	0.36709569110548845	Direct		149	21	48	122	Direct
2121	GO:0097237	GO:0098869	GO:0097237	GO:0098869	0.6561264822149172	Direct		149	21	49	121	Direct
2122	GO:0097237	WP15	GO:0097237	WP15	0.4841897233223758	Direct		149	21	50	120	Direct
2123	GO:0034599	ko00480	GO:0034599	ko00480	0.35143769968351635	Direct		150	20	44	126	Direct
2124	GO:0034599	GO:0098754	GO:0034599	GO:0098754	0.36438356164636027	Direct		150	20	46	124	Direct
2125	GO:0034599	GO:1990748	GO:0034599	GO:1990748	0.36438356164636027	Direct		150	20	47	123	Direct
2126	GO:0034599	GO:0070301	GO:0034599	GO:0070301	0.5468750000018667	Direct		150	20	143	27	Direct
2127	GO:0034599	GO:0071236	GO:0034599	GO:0071236	0.5013227513246645	Direct		150	20	144	26	Direct
2128	GO:0034599	R-HSA-3299685	GO:0034599	R-HSA-3299685	0.332822085892538	Direct		150	20	48	122	Direct
2129	GO:0034599	GO:0098869	GO:0034599	GO:0098869	0.36438356164636027	Direct		150	20	49	121	Direct
2130	GO:0034599	GO:0042542	GO:0034599	GO:0042542	0.578042328043947	Direct		150	20	145	25	Direct
2131	GO:0034599	GO:0046677	GO:0034599	GO:0046677	0.5230263157909901	Direct		150	20	146	24	Direct
2132	GO:0034599	WP408	GO:0034599	WP408	0.315634218292012	Direct		150	20	18	152	Direct
2133	GO:0034599	GO:0034614	GO:0034599	GO:0034614	0.7913669064755456	Direct		150	20	147	23	Direct
2134	GO:0034599	GO:0097237	GO:0034599	GO:0097237	0.7526652452033233	Direct		150	20	149	21	Direct
2135	GO:0000302	GO:0070301	GO:0000302	GO:0070301	0.5711116588630666	Direct		151	19	143	27	Direct
2136	GO:0000302	GO:0071236	GO:0000302	GO:0071236	0.5223061084439062	Direct		151	19	144	26	Direct
2137	GO:0000302	GO:0042542	GO:0000302	GO:0042542	0.6815374056292708	Direct		151	19	145	25	Direct
2138	GO:0000302	GO:0046677	GO:0000302	GO:0046677	0.6070016939595029	Direct		151	19	146	24	Direct
2139	GO:0000302	GO:0034614	GO:0000302	GO:0034614	0.8203221809176222	Direct		151	19	147	23	Direct
2140	GO:0000302	GO:0009636	GO:0000302	GO:0009636	0.6472239550851742	Direct		151	19	148	22	Direct
2141	GO:0000302	GO:0097237	GO:0000302	GO:0097237	0.7137111517376566	Direct		151	19	149	21	Direct
2142	GO:0000302	GO:0034599	GO:0000302	GO:0034599	0.8495850622411163	Direct		151	19	150	20	Direct
2143	GO:0000302	GO:0006979	GO:0000302	GO:0006979	0.7977626035164198	Direct		151	19	3	167	Direct
2190	GO:0009144	GO:0009168	GO:0009144	GO:0009168	0.5405940594069959	Direct		161	9	125	45	Direct
2191	GO:0009144	ko04260	GO:0009144	ko04260	0.30509199829012873	Direct		161	9	99	71	Direct
2192	GO:0009144	GO:0015672	GO:0009144	GO:0015672	0.40894148586568957	Direct		161	9	130	40	Direct
2193	GO:0009144	GO:1902600	GO:0009144	GO:1902600	0.526438569207911	Direct		161	9	133	37	Direct
2194	GO:0009144	GO:0098662	GO:0009144	GO:0098662	0.3721474546529084	Direct		161	9	10	160	Direct
2195	GO:0009144	GO:0022900	GO:0009144	GO:0022900	0.6244739397870438	Direct		161	9	162	8	Direct
2196	GO:0009144	R-HSA-163200	GO:0009144	R-HSA-163200	0.7048846675718154	Direct		161	9	163	7	Direct
2197	GO:0009144	GO:0009205	GO:0009144	GO:0009205	1.0	Direct		161	9	164	6	Direct
2198	GO:0009144	GO:0046034	GO:0009144	GO:0046034	0.9830310122879165	Direct		161	9	165	5	Direct
2199	GO:0009144	hsa05016	GO:0009144	hsa05016	0.6947368421058112	Direct		161	9	167	3	Direct
2200	GO:0009144	ko00190	GO:0009144	ko00190	0.8063439065112263	Direct		161	9	168	2	Direct
2201	GO:0009144	ko05016	GO:0009144	ko05016	0.7084511467174648	Direct		161	9	20	150	Direct
2202	GO:0022900	WP4922	GO:0022900	WP4922	0.3032036613295426	Direct		162	8	97	73	Direct
2203	GO:0022900	ko04260	GO:0022900	ko04260	0.3885081707978631	Direct		162	8	99	71	Direct
2204	GO:0022900	hsa04260	GO:0022900	hsa04260	0.3743150684950148	Direct		162	8	100	70	Direct
2205	GO:0022900	R-HSA-163200	GO:0022900	R-HSA-163200	0.5665967488211249	Direct		162	8	163	7	Direct
2206	GO:0022900	GO:0046034	GO:0022900	GO:0046034	0.6374204869495842	Direct		162	8	165	5	Direct
2207	GO:0022900	hsa05016	GO:0022900	hsa05016	0.6120628960345867	Direct		162	8	167	3	Direct
2208	GO:0022900	ko00190	GO:0022900	ko00190	0.6420213449924429	Direct		162	8	168	2	Direct
2209	GO:0022900	ko05016	GO:0022900	ko05016	0.6259405231107739	Direct		162	8	20	150	Direct
2210	R-HSA-163200	WP4922	R-HSA-163200	WP4922	0.33924050633153946	Direct		163	7	97	73	Direct
2211	R-HSA-163200	R-HSA-163210	R-HSA-163200	R-HSA-163210	0.4126582278502573	Direct		163	7	132	38	Direct
2212	R-HSA-163200	hsa05016	R-HSA-163200	hsa05016	0.7417120237511743	Direct		163	7	167	3	Direct
2213	R-HSA-163200	ko00190	R-HSA-163200	ko00190	0.8812124522121882	Direct		163	7	168	2	Direct
2214	R-HSA-163200	ko05016	R-HSA-163200	ko05016	0.7586989409990166	Direct		163	7	20	150	Direct
2215	GO:0009205	ko04260	GO:0009205	ko04260	0.30509199829012873	Direct		164	6	99	71	Direct
2216	GO:0009205	GO:0015672	GO:0009205	GO:0015672	0.40894148586568957	Direct		164	6	130	40	Direct
2217	GO:0009205	GO:1902600	GO:0009205	GO:1902600	0.526438569207911	Direct		164	6	133	37	Direct
2218	GO:0009205	GO:0098662	GO:0009205	GO:0098662	0.3721474546529084	Direct		164	6	10	160	Direct
2219	GO:0009205	GO:0022900	GO:0009205	GO:0022900	0.6244739397870438	Direct		164	6	162	8	Direct
2220	GO:0009205	R-HSA-163200	GO:0009205	R-HSA-163200	0.7048846675718154	Direct		164	6	163	7	Direct
2221	GO:0009205	GO:0046034	GO:0009205	GO:0046034	0.9830310122879165	Direct		164	6	165	5	Direct
2222	GO:0009205	hsa05016	GO:0009205	hsa05016	0.6947368421058112	Direct		164	6	167	3	Direct
2223	GO:0009205	ko00190	GO:0009205	ko00190	0.8063439065112263	Direct		164	6	168	2	Direct
2224	GO:0009205	ko05016	GO:0009205	ko05016	0.7084511467174648	Direct		164	6	20	150	Direct
2225	GO:0046034	ko04260	GO:0046034	ko04260	0.3137598597738742	Direct		165	5	99	71	Direct
2226	GO:0046034	hsa04260	GO:0046034	hsa04260	0.30280480824443773	Direct		165	5	100	70	Direct
2227	GO:0046034	GO:1902600	GO:0046034	GO:1902600	0.5394388565389114	Direct		165	5	133	37	Direct
2228	GO:0046034	GO:0098662	GO:0046034	GO:0098662	0.38053797468461026	Direct		165	5	10	160	Direct
2229	GO:0046034	R-HSA-163200	GO:0046034	R-HSA-163200	0.7197422917631013	Direct		165	5	163	7	Direct
2230	GO:0046034	hsa05016	GO:0046034	hsa05016	0.7082984073768939	Direct		165	5	167	3	Direct
2231	GO:0046034	ko00190	GO:0046034	ko00190	0.8227303599731813	Direct		165	5	168	2	Direct
2232	GO:0046034	ko05016	GO:0046034	ko05016	0.7223994894708392	Direct		165	5	20	150	Direct
2233	GO:0006091	GO:0009168	GO:0006091	GO:0009168	0.4201333026901962	Direct		166	4	125	45	Direct
2234	GO:0006091	GO:0015672	GO:0006091	GO:0015672	0.3502358490577147	Direct		166	4	130	40	Direct
2235	GO:0006091	GO:1902600	GO:0006091	GO:1902600	0.4092349479414081	Direct		166	4	133	37	Direct
2236	GO:0006091	GO:0009144	GO:0006091	GO:0009144	0.8012651555090017	Direct		166	4	161	9	Direct
2237	GO:0006091	GO:0022900	GO:0006091	GO:0022900	0.746847720659981	Direct		166	4	162	8	Direct
2238	GO:0006091	R-HSA-163200	GO:0006091	R-HSA-163200	0.6136455389590961	Direct		166	4	163	7	Direct
2239	GO:0006091	GO:0009205	GO:0006091	GO:0009205	0.8012651555090017	Direct		166	4	164	6	Direct
2240	GO:0006091	GO:0046034	GO:0006091	GO:0046034	0.814366998577812	Direct		166	4	165	5	Direct
2241	GO:0006091	hsa05016	GO:0006091	hsa05016	0.6101568334584375	Direct		166	4	167	3	Direct
2242	GO:0006091	ko00190	GO:0006091	ko00190	0.6707827126076209	Direct		166	4	168	2	Direct
2243	GO:0006091	GO:0006119	GO:0006091	GO:0006119	0.7264150943400904	Direct		166	4	169	1	Direct
2244	GO:0006091	ko05016	GO:0006091	ko05016	0.6216676120255799	Direct		166	4	20	150	Direct
2245	hsa05016	ko04260	hsa05016	ko04260	0.3530552861317908	Direct		167	3	99	71	Direct
2246	hsa05016	ko00190	hsa05016	ko00190	0.8097205346298068	Direct		167	3	168	2	Direct
2247	hsa05016	ko05016	hsa05016	ko05016	0.9802586793737625	Direct		167	3	20	150	Direct
2248	ko00190	ko04260	ko00190	ko04260	0.4157806379425792	Direct		168	2	99	71	Direct
2249	ko00190	ko05016	ko00190	ko05016	0.8277014481994056	Direct		168	2	20	150	Direct
2250	GO:0006119	GO:0009060	GO:0006119	GO:0009060	0.3673938002317276	Direct		169	1	93	77	Direct
2251	GO:0006119	GO:0019646	GO:0006119	GO:0019646	0.3288672350815427	Direct		169	1	95	75	Direct
2252	GO:0006119	GO:0006123	GO:0006119	GO:0006123	0.3288672350815427	Direct		169	1	96	74	Direct
2253	GO:0006119	WP4922	GO:0006119	WP4922	0.3144208037848556	Direct		169	1	97	73	Direct
2254	GO:0006119	GO:0015986	GO:0006119	GO:0015986	0.38297872340637007	Direct		169	1	126	44	Direct
2255	GO:0006119	GO:0015985	GO:0006119	GO:0015985	0.38297872340637007	Direct		169	1	127	43	Direct
2256	GO:0006119	ko04260	GO:0006119	ko04260	0.40173724213000545	Direct		169	1	99	71	Direct
2257	GO:0006119	GO:0007007	GO:0006119	GO:0007007	0.35267857143066605	Direct		169	1	128	42	Direct
2258	GO:0006119	GO:1990542	GO:0006119	GO:1990542	0.3130792996930916	Direct		169	1	129	41	Direct
2259	GO:0006119	GO:0015672	GO:0006119	GO:0015672	0.46296296296416445	Direct		169	1	130	40	Direct
2260	GO:0006119	hsa04260	GO:0006119	hsa04260	0.386892177591732	Direct		169	1	100	70	Direct
2261	GO:0006119	GO:0042776	GO:0006119	GO:0042776	0.38297872340637007	Direct		169	1	131	39	Direct
2262	GO:0006119	R-HSA-163210	GO:0006119	R-HSA-163210	0.38297872340637007	Direct		169	1	132	38	Direct
2263	GO:0006119	GO:1902600	GO:0006119	GO:1902600	0.6118546845135046	Direct		169	1	133	37	Direct
2264	GO:0006119	GO:0098662	GO:0006119	GO:0098662	0.41844919786209006	Direct		169	1	10	160	Direct
2265	GO:0006119	GO:0009144	GO:0006119	GO:0009144	0.8284023668642325	Direct		169	1	161	9	Direct
2266	GO:0006119	GO:0022900	GO:0006119	GO:0022900	0.7146101438310581	Direct		169	1	162	8	Direct
2267	GO:0006119	R-HSA-163200	GO:0006119	R-HSA-163200	0.8603531300163764	Direct		169	1	163	7	Direct
2268	GO:0006119	GO:0009205	GO:0006119	GO:0009205	0.8284023668642325	Direct		169	1	164	6	Direct
2269	GO:0006119	GO:0046034	GO:0006119	GO:0046034	0.8449197860965574	Direct		169	1	165	5	Direct
2270	GO:0006119	hsa05016	GO:0006119	hsa05016	0.7922636103156177	Direct		169	1	167	3	Direct
2271	GO:0006119	ko00190	GO:0006119	ko00190	0.9315499606610531	Direct		169	1	168	2	Direct
2272	GO:0006119	ko05016	GO:0006119	ko05016	0.8096280087531379	Direct		169	1	20	150	Direct
