# Supplementary material for: A zebrafish screen reveals Renin-angiotensin system inhibitors as neuroprotective via mitochondrial restoration in dopamine neurons
Source: eLife journal article supplement (doi:10.7554/elife.69795), 2021-09-22
Supplement: fig5-data4 [file elife-69795-fig5-data4-v1.cys › CytoscapeSession-2021_03_12-09_32/tables/35-From+cyREST/SHARED_ATTRS-org.cytoscape.model.CyNode-35+shared+node.cytable]

CyCSV-Version	1
SUID	#COUNT_001	#GeneInGO	#GeneInGOAndHitList	#GeneInHitList	#TotalGeneInLibrary	%InGO	_InGO	_LogP_MyList	_MEMBER_MyList	_PATTERN_	_RANK_	BestEnrichmentInGroup	BestLogPInGroup	canonicalName	Category	CategoryID	CLUSTER_LABEL	Description	Enrichment	EvidenceCutoff	FirstInGroupByEnrichment	FirstInGroupByLogP	Gene	GeneID	GiniIndex	GROUP_ID	Hits	id	Log(q-value)	Log_q_value_	LogP	PARENT_GO	shared name	STDV %InGO	STDV_InGO	Symbol	Z-score	Z_score
java.lang.Long	java.lang.Double	java.lang.Double	java.lang.Double	java.lang.Double	java.lang.Double	java.lang.Double	java.lang.Double	java.lang.Double	java.lang.Double	java.lang.String	java.lang.Double	java.lang.Double	java.lang.Double	java.lang.String	java.lang.String	java.lang.Double	java.lang.String	java.lang.String	java.lang.Double	java.lang.Double	java.lang.Double	java.lang.Double	java.lang.String	java.lang.String	java.lang.Double	java.lang.Double	java.lang.String	java.lang.String	java.lang.Double	java.lang.Double	java.lang.Double	java.lang.String	java.lang.String	java.lang.Double	java.lang.Double	java.lang.String	java.lang.Double	java.lang.Double
	mutable	mutable	mutable	mutable	mutable	mutable	mutable	mutable	mutable	mutable	mutable	mutable	mutable	mutable	mutable	mutable	mutable	mutable	mutable	mutable	mutable	mutable	mutable	mutable	mutable	mutable	mutable	mutable	mutable	mutable	mutable	mutable		mutable	mutable	mutable	mutable	mutable
35 shared node
61	24.0	148.0	24.0	392.0	28133.0	6.122448979591836		-18.09475693824449	1.0	M1	1.0	17.941964285714285	-18.56806122632926	GO:0006119	GO Biological Processes	19.0		oxidative phosphorylation	11.638030888030887	0.0	0.0	0.0	GO:0006119	513|514|517|518|1337|1345|1347|1351|1537|4508|4694|4698|4701|4705|4706|4708|4722|4724|4729|9377|10632|23479|51142|84701	0.0	1.0	ATP5F1D|ATP5F1E|ATP5MC2|ATP5MC3|COX6A1|COX6C|COX7A2|COX8A|CYC1|ATP6|NDUFA1|NDUFA5|NDUFA7|NDUFA10|NDUFAB1|NDUFB2|NDUFS3|NDUFS4|NDUFV2|COX5A|ATP5MG|ISCU|CHCHD2|COX4I2	1	-14.252714983109602		-18.09475693824449	19_GO:0008152 metabolic process	1	1.2108781141279994			15.424522584917023
62	23.0	133.0	23.0	392.0	28133.0	5.86734693877551		-18.014484059672178	1.0	M1	1.0	17.941964285714285	-18.56806122632926	ko00190	KEGG Pathway	24.0		Oxidative phosphorylation	12.410982814178304	0.0	0.0	0.0	ko00190	513|514|517|518|525|1337|1345|1347|1351|1537|4508|4694|4698|4701|4705|4706|4708|4722|4724|4729|9377|10632|84701	0.0	1.0	ATP5F1D|ATP5F1E|ATP5MC2|ATP5MC3|ATP6V1B1|COX6A1|COX6C|COX7A2|COX8A|CYC1|ATP6|NDUFA1|NDUFA5|NDUFA7|NDUFA10|NDUFAB1|NDUFB2|NDUFS3|NDUFS4|NDUFV2|COX5A|ATP5MG|COX4I2	2	-14.252714983109602		-18.014484059672178		2	1.1869925701863226			15.680219497587869
63	28.0	222.0	28.0	392.0	28133.0	7.142857142857143		-18.009560202094686	1.0	M1	1.0	17.941964285714285	-18.56806122632926	hsa05016	KEGG Pathway	24.0		Huntington disease	9.051801801801803	0.0	0.0	0.0	hsa05016	513|514|517|518|1337|1345|1347|1351|1537|1742|2876|2904|4508|4694|4698|4701|4705|4706|4708|4722|4724|4729|5743|6667|7417|9377|10891|84701	0.0	1.0	ATP5F1D|ATP5F1E|ATP5MC2|ATP5MC3|COX6A1|COX6C|COX7A2|COX8A|CYC1|DLG4|GPX1|GRIN2B|ATP6|NDUFA1|NDUFA5|NDUFA7|NDUFA10|NDUFAB1|NDUFB2|NDUFS3|NDUFS4|NDUFV2|PTGS2|SP1|VDAC2|COX5A|PPARGC1A|COX4I2	3	-14.252714983109602		-18.009560202094686		3	1.3007702840797921			14.317399608365701
64	40.0	512.0	40.0	392.0	28133.0	10.204081632653061		-17.877296550719016	1.0	M1	1.0	17.941964285714285	-18.56806122632926	GO:0006091	GO Biological Processes	19.0		generation of precursor metabolites and energy	5.606863839285714	0.0	0.0	0.0	GO:0006091	207|226|230|513|514|517|518|551|664|1337|1345|1347|1351|1537|2230|2821|2936|4508|4694|4698|4701|4705|4706|4708|4722|4724|4729|5210|7306|8560|9377|10632|10891|23479|26330|27294|51142|79689|79751|84701	0.0	1.0	AKT1|ALDOA|ALDOC|ATP5F1D|ATP5F1E|ATP5MC2|ATP5MC3|AVP|BNIP3|COX6A1|COX6C|COX7A2|COX8A|CYC1|FDX1|GPI|GSR|ATP6|NDUFA1|NDUFA5|NDUFA7|NDUFA10|NDUFAB1|NDUFB2|NDUFS3|NDUFS4|NDUFV2|PFKFB4|TYRP1|DEGS1|COX5A|ATP5MG|PPARGC1A|ISCU|GAPDHS|DHDH|CHCHD2|STEAP4|SLC25A22|COX4I2	4	-14.217361344741988		-17.877296550719016	19_GO:0008152 metabolic process	4	1.528875871968151			12.505554109270347
65	32.0	313.0	32.0	392.0	28133.0	8.16326530612245		-17.752525747081222	1.0	M1	1.0	17.941964285714285	-18.56806122632926	GO:0046034	GO Biological Processes	19.0		ATP metabolic process	7.337288909173894	0.0	0.0	0.0	GO:0046034	204|226|230|513|514|517|518|525|1337|1345|1347|1351|1537|2821|4508|4694|4698|4701|4705|4706|4708|4722|4724|4729|5210|9377|10632|10891|23479|26330|51142|84701	0.0	1.0	AK2|ALDOA|ALDOC|ATP5F1D|ATP5F1E|ATP5MC2|ATP5MC3|ATP6V1B1|COX6A1|COX6C|COX7A2|COX8A|CYC1|GPI|ATP6|NDUFA1|NDUFA5|NDUFA7|NDUFA10|NDUFAB1|NDUFB2|NDUFS3|NDUFS4|NDUFV2|PFKFB4|COX5A|ATP5MG|PPARGC1A|ISCU|GAPDHS|CHCHD2|COX4I2	5	-14.171771787151819		-17.752525747081222	19_GO:0008152 metabolic process	5	1.382920259548854			13.402301824642333
66	33.0	343.0	33.0	392.0	28133.0	8.418367346938776		-17.48990754958276	1.0	M1	1.0	17.941964285714285	-18.56806122632926	GO:0009205	GO Biological Processes	19.0		purine ribonucleoside triphosphate metabolic process	6.9047792586422325	0.0	0.0	0.0	GO:0009205	204|226|230|513|514|517|518|525|1337|1345|1347|1351|1537|2821|4508|4694|4698|4701|4705|4706|4708|4722|4724|4729|5210|9377|10632|10891|23479|26330|51142|84701|120892	0.0	1.0	AK2|ALDOA|ALDOC|ATP5F1D|ATP5F1E|ATP5MC2|ATP5MC3|ATP6V1B1|COX6A1|COX6C|COX7A2|COX8A|CYC1|GPI|ATP6|NDUFA1|NDUFA5|NDUFA7|NDUFA10|NDUFAB1|NDUFB2|NDUFS3|NDUFS4|NDUFV2|PFKFB4|COX5A|ATP5MG|PPARGC1A|ISCU|GAPDHS|CHCHD2|COX4I2|LRRK2	6	-13.97610037928397		-17.48990754958276	19_GO:0008152 metabolic process	6	1.402410302986663			13.079427507637059
67	22.0	125.0	22.0	392.0	28133.0	5.612244897959184		-17.426391196029623	1.0	M1	1.0	17.941964285714285	-18.56806122632926	R-HSA-163200	Reactome Gene Sets	6.0		Respiratory electron transport, ATP synthesis by chemiosmotic coupling, and heat production by uncoupling proteins.	12.631142857142857	0.0	0.0	0.0	R-HSA-163200	513|514|517|518|1337|1345|1351|1537|4508|4694|4698|4701|4705|4706|4708|4722|4724|4729|9377|10632|79133|116228	0.0	1.0	ATP5F1D|ATP5F1E|ATP5MC2|ATP5MC3|COX6A1|COX6C|COX8A|CYC1|ATP6|NDUFA1|NDUFA5|NDUFA7|NDUFA10|NDUFAB1|NDUFB2|NDUFS3|NDUFS4|NDUFV2|COX5A|ATP5MG|NDUFAF5|COX20	7	-13.97057597270852		-17.426391196029623		7	1.1624736084356109			15.49239741976746
68	25.0	178.0	25.0	392.0	28133.0	6.377551020408164		-17.271764593697377	1.0	M1	1.0	17.941964285714285	-18.56806122632926	GO:0022900	GO Biological Processes	19.0		electron transport chain	10.07975521669342	0.0	0.0	0.0	GO:0022900	1337|1345|1347|1351|1537|2230|2936|4694|4698|4701|4705|4706|4708|4722|4724|4729|8560|9377|10891|23479|27294|51142|79689|79751|84701	0.0	1.0	COX6A1|COX6C|COX7A2|COX8A|CYC1|FDX1|GSR|NDUFA1|NDUFA5|NDUFA7|NDUFA10|NDUFAB1|NDUFB2|NDUFS3|NDUFS4|NDUFV2|DEGS1|COX5A|PPARGC1A|ISCU|DHDH|CHCHD2|STEAP4|SLC25A22|COX4I2	8	-13.90678509063439		-17.271764593697377	19_GO:0008152 metabolic process	8	1.234167017505837			14.44563625443248
69	33.0	349.0	33.0	392.0	28133.0	8.418367346938776		-17.261848910091523	1.0	M1	1.0	17.941964285714285	-18.56806122632926	GO:0009144	GO Biological Processes	19.0		purine nucleoside triphosphate metabolic process	6.786072451903397	0.0	0.0	0.0	GO:0009144	204|226|230|513|514|517|518|525|1337|1345|1347|1351|1537|2821|4508|4694|4698|4701|4705|4706|4708|4722|4724|4729|5210|9377|10632|10891|23479|26330|51142|84701|120892	0.0	1.0	AK2|ALDOA|ALDOC|ATP5F1D|ATP5F1E|ATP5MC2|ATP5MC3|ATP6V1B1|COX6A1|COX6C|COX7A2|COX8A|CYC1|GPI|ATP6|NDUFA1|NDUFA5|NDUFA7|NDUFA10|NDUFAB1|NDUFB2|NDUFS3|NDUFS4|NDUFV2|PFKFB4|COX5A|ATP5MG|PPARGC1A|ISCU|GAPDHS|CHCHD2|COX4I2|LRRK2	9	-13.90678509063439		-17.261848910091523	19_GO:0008152 metabolic process	9	1.402410302986663			12.929492468673535
70	22.0	153.0	22.0	392.0	28133.0	5.612244897959184		-15.485181477157022	1.0	M1	1.0	20.83582949308756	-15.830455470512995	ko03010	KEGG Pathway	24.0		Ribosome	10.319561157796452	0.0	0.0	0.0	ko03010	2197|6125|6130|6132|6136|6146|6155|6169|6188|6191|6206|6207|6217|6224|6227|6231|23521|28998|51023|51116|51187|51318	0.0	2.0	FAU|RPL5|RPL7A|RPL8|RPL12|RPL22|RPL27|RPL38|RPS3|RPS4X|RPS12|RPS13|RPS16|RPS20|RPS21|RPS26|RPL13A|MRPL13|MRPS18C|MRPS2|RSL24D1|MRPL35	10	-12.468698947666182		-15.485181477157022		10	1.1624736084356109			13.740407243066874
71	18.0	93.0	18.0	392.0	28133.0	4.591836734693878		-15.127220789078113	1.0	M1	1.0	20.83582949308756	-15.830455470512995	R-HSA-2408557	Reactome Gene Sets	6.0		Selenocysteine synthesis	13.890552995391706	0.0	0.0	0.0	R-HSA-2408557	6125|6130|6132|6136|6146|6155|6169|6188|6191|6206|6207|6217|6224|6227|6231|22928|23521|51091	0.0	2.0	RPL5|RPL7A|RPL8|RPL12|RPL22|RPL27|RPL38|RPS3|RPS4X|RPS12|RPS13|RPS16|RPS20|RPS21|RPS26|SEPHS2|RPL13A|SEPSECS	11	-12.166255587437103		-15.127220789078113		11	1.0571654303469598			14.801519444008097
72	17.0	80.0	17.0	392.0	28133.0	4.336734693877551		-15.041885474120217	1.0	M1	1.0	20.83582949308756	-15.830455470512995	CORUM:306	CORUM	33.0		Ribosome, cytoplasmic	15.250669642857142	0.0	0.0	0.0	CORUM:306	2197|6125|6130|6132|6136|6146|6155|6169|6188|6191|6206|6207|6217|6224|6227|6231|23521	0.0	2.0	FAU|RPL5|RPL7A|RPL8|RPL12|RPL22|RPL27|RPL38|RPS3|RPS4X|RPS12|RPS13|RPS16|RPS20|RPS21|RPS26|RPL13A	12	-12.097953611777989		-15.041885474120217		12	1.0287527141614627			15.173050098599397
73	22.0	163.0	22.0	392.0	28133.0	5.612244897959184		-14.891051244957309	1.0	M1	1.0	20.83582949308756	-15.830455470512995	hsa03010	KEGG Pathway	24.0		Ribosome	9.686459246275197	0.0	0.0	0.0	hsa03010	2197|6125|6130|6132|6136|6146|6155|6169|6188|6191|6206|6207|6217|6224|6227|6231|23521|28998|51023|51116|51187|51318	0.0	2.0	FAU|RPL5|RPL7A|RPL8|RPL12|RPL22|RPL27|RPL38|RPS3|RPS4X|RPS12|RPS13|RPS16|RPS20|RPS21|RPS26|RPL13A|MRPL13|MRPS18C|MRPS2|RSL24D1|MRPL35	13	-11.96350979880325		-14.891051244957309		13	1.1624736084356109			13.22125364716293
74	19.0	112.0	19.0	392.0	28133.0	4.846938775510204		-14.817735477501609	1.0	M1	1.0	20.83582949308756	-15.830455470512995	R-HSA-1799339	Reactome Gene Sets	6.0		SRP-dependent cotranslational protein targeting to membrane	12.174904336734695	0.0	0.0	0.0	R-HSA-1799339	6125|6130|6132|6136|6146|6155|6169|6188|6191|6206|6207|6217|6224|6227|6231|6745|6747|23480|23521	0.0	2.0	RPL5|RPL7A|RPL8|RPL12|RPL22|RPL27|RPL38|RPS3|RPS4X|RPS12|RPS13|RPS16|RPS20|RPS21|RPS26|SSR1|SSR3|SEC61G|RPL13A	14	-11.905988298530781		-14.817735477501609		14	1.0846812073485896			14.086181890572583
75	38.0	576.0	38.0	392.0	28133.0	9.693877551020408		-14.590100622436372	1.0	M1	1.0	20.83582949308756	-15.830455470512995	R-HSA-9675108	Reactome Gene Sets	6.0		Nervous system development	4.73468501984127	0.0	0.0	0.0	R-HSA-9675108	25|387|775|1741|1742|1944|2904|3685|5687|6125|6130|6132|6136|6146|6155|6169|6188|6191|6206|6207|6217|6224|6227|6231|6324|6453|6585|6921|7277|7402|7846|10094|23396|23521|55558|80728|84790|219699	0.0	2.0	ABL1|RHOA|CACNA1C|DLG3|DLG4|EFNA3|GRIN2B|ITGAV|PSMA6|RPL5|RPL7A|RPL8|RPL12|RPL22|RPL27|RPL38|RPS3|RPS4X|RPS12|RPS13|RPS16|RPS20|RPS21|RPS26|SCN1B|ITSN1|SLIT1|ELOC|TUBA4A|UTRN|TUBA1A|ARPC3|PIP5K1C|RPL13A|PLXNA3|ARHGAP39|TUBA1C|UNC5B	15	-11.693593410022281		-14.590100622436372		15	1.4943912940096702			10.765433807167097
76	18.0	101.0	18.0	392.0	28133.0	4.591836734693878		-14.461687791456638	1.0	M1	1.0	20.83582949308756	-15.830455470512995	R-HSA-72689	Reactome Gene Sets	6.0		Formation of a pool of free 40S subunits	12.79031117397454	0.0	0.0	0.0	R-HSA-72689	3646|6125|6130|6132|6136|6146|6155|6169|6188|6191|6206|6207|6217|6224|6227|6231|8664|23521	0.0	2.0	EIF3E|RPL5|RPL7A|RPL8|RPL12|RPL22|RPL27|RPL38|RPS3|RPS4X|RPS12|RPS13|RPS16|RPS20|RPS21|RPS26|EIF3D|RPL13A	16	-11.612682790987456		-14.461687791456638		16	1.0571654303469598			14.110460704918237
77	37.0	551.0	37.0	392.0	28133.0	9.438775510204081		-14.455302202663626	1.0	M1	1.0	20.83582949308756	-15.830455470512995	R-HSA-422475	Reactome Gene Sets	6.0		Axon guidance	4.819257194710915	0.0	0.0	0.0	R-HSA-422475	25|387|775|1741|1742|1944|2904|3685|5687|6125|6130|6132|6136|6146|6155|6169|6188|6191|6206|6207|6217|6224|6227|6231|6324|6453|6585|6921|7277|7846|10094|23396|23521|55558|80728|84790|219699	0.0	2.0	ABL1|RHOA|CACNA1C|DLG3|DLG4|EFNA3|GRIN2B|ITGAV|PSMA6|RPL5|RPL7A|RPL8|RPL12|RPL22|RPL27|RPL38|RPS3|RPS4X|RPS12|RPS13|RPS16|RPS20|RPS21|RPS26|SCN1B|ITSN1|SLIT1|ELOC|TUBA4A|TUBA1A|ARPC3|PIP5K1C|RPL13A|PLXNA3|ARHGAP39|TUBA1C|UNC5B	17	-11.612682790987456		-14.455302202663626		17	1.4766784534275887			10.762771238390158
78	19.0	118.0	19.0	392.0	28133.0	4.846938775510204		-14.382335825815568	1.0	M1	1.0	20.83582949308756	-15.830455470512995	R-HSA-2408522	Reactome Gene Sets	6.0		Selenoamino acid metabolism	11.555841404358354	0.0	0.0	0.0	R-HSA-2408522	2936|6125|6130|6132|6136|6146|6155|6169|6188|6191|6206|6207|6217|6224|6227|6231|22928|23521|51091	0.0	2.0	GSR|RPL5|RPL7A|RPL8|RPL12|RPL22|RPL27|RPL38|RPS3|RPS4X|RPS12|RPS13|RPS16|RPS20|RPS21|RPS26|SEPHS2|RPL13A|SEPSECS	18	-11.554909532544777		-14.382335825815568		18	1.0846812073485896			13.659060495971273
79	17.0	229.0	17.0	392.0	28133.0	4.336734693877551		-7.565674792986988	1.0	M1	1.0	5.581944444444445	-8.207266599743216	GO:0000302	GO Biological Processes	19.0		response to reactive oxygen species	5.327744853399875	0.0	0.0	0.0	GO:0000302	25|207|347|664|2353|2876|2950|3039|5052|6188|10365|10399|10891|11235|120892|133522|140823	0.0	3.0	ABL1|AKT1|APOD|BNIP3|FOS|GPX1|GSTP1|HBA1|PRDX1|RPS3|KLF2|RACK1|PPARGC1A|PDCD10|LRRK2|PPARGC1B|ROMO1	19	-5.263674434010413		-7.565674792986988	19_GO:0050896 response to stimulus	19	1.0287527141614627			7.816789912628365
80	18.0	306.0	18.0	392.0	28133.0	4.591836734693878		-6.445998971518341	1.0	M1	1.0	5.581944444444445	-8.207266599743216	GO:0034599	GO Biological Processes	19.0		cellular response to oxidative stress	4.221638655462185	0.0	0.0	0.0	GO:0034599	25|207|664|2353|2876|2936|2950|4257|5052|6188|10365|10399|10891|11235|51142|120892|133522|140823	0.0	3.0	ABL1|AKT1|BNIP3|FOS|GPX1|GSR|GSTP1|MGST1|PRDX1|RPS3|KLF2|RACK1|PPARGC1A|PDCD10|CHCHD2|LRRK2|PPARGC1B|ROMO1	20	-4.187464306322856		-6.445998971518341	19_GO:0050896 response to stimulus	20	1.0571654303469598			6.735760372148023
81	16.0	245.0	16.0	392.0	28133.0	4.081632653061225		-6.3964447681122	1.0	M1	1.0	5.581944444444445	-8.207266599743216	GO:0097237	GO Biological Processes	19.0		cellular response to toxic substance	4.686880466472304	0.0	0.0	0.0	GO:0097237	25|664|2876|2936|2950|3039|4257|5052|5743|6188|10365|10399|10891|11235|51714|120892	0.0	3.0	ABL1|BNIP3|GPX1|GSR|GSTP1|HBA1|MGST1|PRDX1|PTGS2|RPS3|KLF2|RACK1|PPARGC1A|PDCD10|SELENOT|LRRK2	21	-4.148129268098402		-6.3964447681122	19_GO:0050896 response to stimulus	21	0.9993665598252253			6.889944069355177
82	22.0	506.0	22.0	392.0	28133.0	5.612244897959184		-5.5144948022049105	1.0	M1	1.0	5.581944444444445	-8.207266599743216	GO:0009636	GO Biological Processes	19.0		response to toxic substance	3.1203416149068324	0.0	0.0	0.0	GO:0009636	25|551|664|1066|2353|2876|2904|2936|2950|3039|4257|5052|5743|6188|6191|6324|10365|10399|10891|11235|51714|120892	0.0	3.0	ABL1|AVP|BNIP3|CES1|FOS|GPX1|GRIN2B|GSR|GSTP1|HBA1|MGST1|PRDX1|PTGS2|RPS3|RPS4X|SCN1B|KLF2|RACK1|PPARGC1A|PDCD10|SELENOT|LRRK2	22	-3.337433179836636		-5.5144948022049105	19_GO:0050896 response to stimulus	22	1.1624736084356109			5.721323614418502
83	12.0	163.0	12.0	392.0	28133.0	3.061224489795918		-5.478303904369631	1.0	M1	1.0	5.581944444444445	-8.207266599743216	GO:0034614	GO Biological Processes	19.0		cellular response to reactive oxygen species	5.283523225241017	0.0	0.0	0.0	GO:0034614	25|207|664|2353|5052|6188|10365|10399|11235|120892|133522|140823	0.0	3.0	ABL1|AKT1|BNIP3|FOS|PRDX1|RPS3|KLF2|RACK1|PDCD10|LRRK2|PPARGC1B|ROMO1	23	-3.3125232924110457		-5.478303904369631	19_GO:0050896 response to stimulus	23	0.8700682497312916			6.519750505789767
84	15.0	312.0	15.0	392.0	28133.0	3.826530612244898		-4.4333437520385095	1.0	M1	1.0	5.581944444444445	-8.207266599743216	GO:0046677	GO Biological Processes	19.0		response to antibiotic	3.4503777472527473	0.0	0.0	0.0	GO:0046677	25|551|664|2230|2876|2904|2950|3039|3399|6188|6191|10365|10399|11235|120892	0.0	3.0	ABL1|AVP|BNIP3|FDX1|GPX1|GRIN2B|GSTP1|HBA1|ID3|RPS3|RPS4X|KLF2|RACK1|PDCD10|LRRK2	24	-2.3904088871823803		-4.4333437520385095	19_GO:0050896 response to stimulus	24	0.9689184016869838			5.173759661660607
85	9.0	135.0	9.0	392.0	28133.0	2.295918367346939		-3.9184796343843087	1.0	M1	1.0	5.581944444444445	-8.207266599743216	GO:0042542	GO Biological Processes	19.0		response to hydrogen peroxide	4.78452380952381	0.0	0.0	0.0	GO:0042542	25|664|2876|3039|6188|10365|10399|11235|120892	0.0	3.0	ABL1|BNIP3|GPX1|HBA1|RPS3|KLF2|RACK1|PDCD10|LRRK2	25	-1.9832015629071198		-3.9184796343843087	19_GO:0050896 response to stimulus	25	0.756469706802007			5.239585157388127
86	9.0	140.0	9.0	392.0	28133.0	2.295918367346939		-3.798413876120648	1.0	M1	1.0	5.581944444444445	-8.207266599743216	GO:0071236	GO Biological Processes	19.0		cellular response to antibiotic	4.613647959183674	0.0	0.0	0.0	GO:0071236	25|664|2230|3399|6188|10365|10399|11235|120892	0.0	3.0	ABL1|BNIP3|FDX1|ID3|RPS3|KLF2|RACK1|PDCD10|LRRK2	26	-1.8928270058546386		-3.798413876120648	19_GO:0050896 response to stimulus	26	0.756469706802007			5.095272540330545
87	7.0	90.0	7.0	392.0	28133.0	1.7857142857142858		-3.5724278492936623	1.0	M1	1.0	5.581944444444445	-8.207266599743216	GO:0070301	GO Biological Processes	19.0		cellular response to hydrogen peroxide	5.581944444444445	0.0	0.0	0.0	GO:0070301	25|664|6188|10365|10399|11235|120892	0.0	3.0	ABL1|BNIP3|RPS3|KLF2|RACK1|PDCD10|LRRK2	27	-1.70348111840545		-3.5724278492936623	19_GO:0050896 response to stimulus	27	0.6688831939860661			5.175366609977966
88	24.0	497.0	24.0	392.0	28133.0	6.122448979591836		-6.779649251402386	1.0	M1	1.0	5.450723327305606	-7.969795820310332	GO:0010975	GO Biological Processes	19.0		regulation of neuron projection development	3.465651049152055	0.0	0.0	0.0	GO:0010975	25|207|387|1627|1742|3397|4076|6324|6453|6498|9175|9798|10300|10501|11178|22999|23025|23303|29116|29956|53335|55558|120892|158866	0.0	4.0	ABL1|AKT1|RHOA|DBN1|DLG4|ID1|CAPRIN1|SCN1B|ITSN1|SKIL|MAP3K13|IST1|KATNB1|SEMA6B|LZTS1|RIMS1|UNC13A|KIF13B|MYLIP|CERS2|BCL11A|PLXNA3|LRRK2|ZDHHC15	28	-4.503529411405789		-6.779649251402386	19_GO:0032502 developmental process	28	1.2108781141279994			6.5925661653640475
89	27.0	663.0	27.0	392.0	28133.0	6.887755102040816		-6.08848537807207	1.0	M1	1.0	5.450723327305606	-7.969795820310332	GO:0048858	GO Biological Processes	19.0		cell projection morphogenesis	2.922672915319974	0.0	0.0	0.0	GO:0048858	25|387|473|1501|1627|1742|1944|2290|3397|4076|6324|6498|6585|9175|9798|10501|11178|11252|22999|23025|23303|53335|55558|120892|123904|158866|219699	0.0	4.0	ABL1|RHOA|RERE|CTNND2|DBN1|DLG4|EFNA3|FOXG1|ID1|CAPRIN1|SCN1B|SKIL|SLIT1|MAP3K13|IST1|SEMA6B|LZTS1|PACSIN2|RIMS1|UNC13A|KIF13B|BCL11A|PLXNA3|LRRK2|NRN1L|ZDHHC15|UNC5B	29	-3.8566849661238307		-6.08848537807207	19_GO:0032502 developmental process	29	1.2790844340522147			5.95545743022667
90	27.0	679.0	27.0	392.0	28133.0	6.887755102040816		-5.891535578511051	1.0	M1	1.0	5.450723327305606	-7.969795820310332	GO:0032990	GO Biological Processes	19.0		cell part morphogenesis	2.8538028613507254	0.0	0.0	0.0	GO:0032990	25|387|473|1501|1627|1742|1944|2290|3397|4076|6324|6498|6585|9175|9798|10501|11178|11252|22999|23025|23303|53335|55558|120892|123904|158866|219699	0.0	4.0	ABL1|RHOA|RERE|CTNND2|DBN1|DLG4|EFNA3|FOXG1|ID1|CAPRIN1|SCN1B|SKIL|SLIT1|MAP3K13|IST1|SEMA6B|LZTS1|PACSIN2|RIMS1|UNC13A|KIF13B|BCL11A|PLXNA3|LRRK2|NRN1L|ZDHHC15|UNC5B	30	-3.6725094545992403		-5.891535578511051	19_GO:0032502 developmental process	30	1.2790844340522147			5.8126999093231735
91	26.0	645.0	26.0	392.0	28133.0	6.63265306122449		-5.8017688954527085	1.0	M1	1.0	5.450723327305606	-7.969795820310332	GO:0048812	GO Biological Processes	19.0		neuron projection morphogenesis	2.89296788482835	0.0	0.0	0.0	GO:0048812	25|387|473|1501|1627|1742|1944|2290|3397|4076|6324|6498|6585|9175|9798|10501|11178|22999|23025|23303|53335|55558|120892|123904|158866|219699	0.0	4.0	ABL1|RHOA|RERE|CTNND2|DBN1|DLG4|EFNA3|FOXG1|ID1|CAPRIN1|SCN1B|SKIL|SLIT1|MAP3K13|IST1|SEMA6B|LZTS1|RIMS1|UNC13A|KIF13B|BCL11A|PLXNA3|LRRK2|NRN1L|ZDHHC15|UNC5B	31	-3.592082797795041		-5.8017688954527085	19_GO:0032502 developmental process	31	1.2568924461356075			5.781410594206349
92	26.0	659.0	26.0	392.0	28133.0	6.63265306122449		-5.6317290270704765	1.0	M1	1.0	5.450723327305606	-7.969795820310332	GO:0120039	GO Biological Processes	19.0		plasma membrane bounded cell projection morphogenesis	2.831508779536094	0.0	0.0	0.0	GO:0120039	25|387|473|1501|1627|1742|1944|2290|3397|4076|6324|6498|6585|9175|9798|10501|11178|22999|23025|23303|53335|55558|120892|123904|158866|219699	0.0	4.0	ABL1|RHOA|RERE|CTNND2|DBN1|DLG4|EFNA3|FOXG1|ID1|CAPRIN1|SCN1B|SKIL|SLIT1|MAP3K13|IST1|SEMA6B|LZTS1|RIMS1|UNC13A|KIF13B|BCL11A|PLXNA3|LRRK2|NRN1L|ZDHHC15|UNC5B	32	-3.443085532152387		-5.6317290270704765	19_GO:0032502 developmental process	32	1.2568924461356075			5.655526567692301
93	27.0	703.0	27.0	392.0	28133.0	6.887755102040816		-5.608716845478261	1.0	M1	1.0	5.450723327305606	-7.969795820310332	GO:0120035	GO Biological Processes	19.0		regulation of plasma membrane bounded cell projection organization	2.756375736638894	0.0	0.0	0.0	GO:0120035	25|207|387|1627|1742|2904|3397|4076|6324|6453|6498|9175|9798|10178|10300|10501|11178|22999|23025|23303|29116|29956|53335|55558|55845|120892|158866	0.0	4.0	ABL1|AKT1|RHOA|DBN1|DLG4|GRIN2B|ID1|CAPRIN1|SCN1B|ITSN1|SKIL|MAP3K13|IST1|TENM1|KATNB1|SEMA6B|LZTS1|RIMS1|UNC13A|KIF13B|MYLIP|CERS2|BCL11A|PLXNA3|BRK1|LRRK2|ZDHHC15	33	-3.4246143277480443		-5.608716845478261	19_GO:0071840 cellular component organization or biogenesis	33	1.2790844340522147			5.606146845689988
94	27.0	712.0	27.0	392.0	28133.0	6.887755102040816		-5.506375019453922	1.0	M1	1.0	5.450723327305606	-7.969795820310332	GO:0031344	GO Biological Processes	19.0		regulation of cell projection organization	2.7215339085072228	0.0	0.0	0.0	GO:0031344	25|207|387|1627|1742|2904|3397|4076|6324|6453|6498|9175|9798|10178|10300|10501|11178|22999|23025|23303|29116|29956|53335|55558|55845|120892|158866	0.0	4.0	ABL1|AKT1|RHOA|DBN1|DLG4|GRIN2B|ID1|CAPRIN1|SCN1B|ITSN1|SKIL|MAP3K13|IST1|TENM1|KATNB1|SEMA6B|LZTS1|RIMS1|UNC13A|KIF13B|MYLIP|CERS2|BCL11A|PLXNA3|BRK1|LRRK2|ZDHHC15	34	-3.334296612282538		-5.506375019453922	19_GO:0071840 cellular component organization or biogenesis	34	1.2790844340522147			5.5309052092190605
95	21.0	486.0	21.0	392.0	28133.0	5.357142857142857		-5.2487975262933	1.0	M1	1.0	5.450723327305606	-7.969795820310332	GO:0022604	GO Biological Processes	19.0		regulation of cell morphogenesis	3.1010802469135803	0.0	0.0	0.0	GO:0022604	25|226|387|1627|1742|3397|4076|6281|6498|9175|9798|10501|11178|22999|23025|23303|53335|55558|56882|120892|158866	0.0	4.0	ABL1|ALDOA|RHOA|DBN1|DLG4|ID1|CAPRIN1|S100A10|SKIL|MAP3K13|IST1|SEMA6B|LZTS1|RIMS1|UNC13A|KIF13B|BCL11A|PLXNA3|CDC42SE1|LRRK2|ZDHHC15	35	-3.102079920384211		-5.2487975262933	19_GO:0032502 developmental process	35	1.1372802614876918			5.554168484974979
96	17.0	365.0	17.0	392.0	28133.0	4.336734693877551		-4.769477772978624	1.0	M1	1.0	5.450723327305606	-7.969795820310332	GO:0045666	GO Biological Processes	19.0		positive regulation of neuron differentiation	3.342612524461839	0.0	0.0	0.0	GO:0045666	387|1627|1742|2290|2624|4076|6324|6453|6498|6935|9175|9798|10300|22999|23025|55558|158866	0.0	4.0	RHOA|DBN1|DLG4|FOXG1|GATA2|CAPRIN1|SCN1B|ITSN1|SKIL|ZEB1|MAP3K13|IST1|KATNB1|RIMS1|UNC13A|PLXNA3|ZDHHC15	36	-2.677744291068591		-4.769477772978624	19_GO:0048518 positive regulation of biological process	36	1.0287527141614627			5.354967932428545
97	14.0	157.0	14.0	392.0	28133.0	3.5714285714285716		-7.3232622117253445	1.0	M1	1.0	23.922619047619047	-7.4898904806439095	GO:1902600	GO Biological Processes	19.0		proton transmembrane transport	6.399681528662421	0.0	0.0	0.0	GO:1902600	513|514|517|518|525|1337|1345|1347|1351|4508|9377|10632|57282|84701	0.0	5.0	ATP5F1D|ATP5F1E|ATP5MC2|ATP5MC3|ATP6V1B1|COX6A1|COX6C|COX7A2|COX8A|ATP6|COX5A|ATP5MG|SLC4A10|COX4I2	37	-5.032542863158459		-7.3232622117253445	19_GO:0051179 localization	37	0.9373047485139712			8.065057059021354
98	6.0	18.0	6.0	392.0	28133.0	1.530612244897959		-6.9449652786903835	1.0	M1	1.0	23.922619047619047	-7.4898904806439095	R-HSA-163210	Reactome Gene Sets	6.0		Formation of ATP by chemiosmotic coupling	23.922619047619047	0.0	0.0	0.0	R-HSA-163210	513|514|517|518|4508|10632	0.0	5.0	ATP5F1D|ATP5F1E|ATP5MC2|ATP5MC3|ATP6|ATP5MG	38	-4.665241314424962		-6.9449652786903835		38	0.6200692247512228			11.564150290522775
99	6.0	22.0	6.0	392.0	28133.0	1.530612244897959		-6.361316257461159	1.0	M1	1.0	23.922619047619047	-7.4898904806439095	GO:0042776	GO Biological Processes	19.0		mitochondrial ATP synthesis coupled proton transport	19.573051948051948	0.0	0.0	0.0	GO:0042776	513|514|517|518|4508|10632	0.0	5.0	ATP5F1D|ATP5F1E|ATP5MC2|ATP5MC3|ATP6|ATP5MG	39	-4.1163543994549485		-6.361316257461159	19_GO:0051179 localization	39	0.6200692247512228			10.359498884450408
100	24.0	537.0	24.0	392.0	28133.0	6.122448979591836		-6.174801709278975	1.0	M1	1.0	23.922619047619047	-7.4898904806439095	GO:0015672	GO Biological Processes	19.0		monovalent inorganic cation transport	3.207501995211492	0.0	0.0	0.0	GO:0015672	207|483|513|514|517|518|525|967|1337|1345|1347|1351|3748|3782|4508|5348|6324|7402|9377|10142|10632|57282|57419|84701	0.0	5.0	AKT1|ATP1B3|ATP5F1D|ATP5F1E|ATP5MC2|ATP5MC3|ATP6V1B1|CD63|COX6A1|COX6C|COX7A2|COX8A|KCNC3|KCNN3|ATP6|FXYD1|SCN1B|UTRN|COX5A|AKAP9|ATP5MG|SLC4A10|SLC24A3|COX4I2	40	-3.9364704301717772		-6.174801709278975	19_GO:0051179 localization	40	1.2108781141279994			6.1397043850113295
101	11.0	118.0	11.0	392.0	28133.0	2.806122448979592		-6.073865380823526	1.0	M1	1.0	23.922619047619047	-7.4898904806439095	GO:1990542	GO Biological Processes	19.0		mitochondrial transmembrane transport	6.690223970944309	0.0	0.0	0.0	GO:1990542	513|514|517|518|4508|10632|26519|51660|79751|119559|140823	0.0	5.0	ATP5F1D|ATP5F1E|ATP5MC2|ATP5MC3|ATP6|ATP5MG|TIMM10|MPC1|SLC25A22|SFXN4|ROMO1	41	-3.845293939005485		-6.073865380823526	19_GO:0051179 localization	41	0.8341222957905684			7.363042933049702
102	8.0	56.0	8.0	392.0	28133.0	2.0408163265306123		-5.979568864893973	1.0	M1	1.0	23.922619047619047	-7.4898904806439095	GO:0007007	GO Biological Processes	19.0		inner mitochondrial membrane organization	10.252551020408164	0.0	0.0	0.0	GO:0007007	513|514|517|518|4508|10632|26519|140823	0.0	5.0	ATP5F1D|ATP5F1E|ATP5MC2|ATP5MC3|ATP6|ATP5MG|TIMM10|ROMO1	42	-3.7542025629511433		-5.979568864893973	19_GO:0071840 cellular component organization or biogenesis	42	0.71413695124874			8.23877102159991
103	6.0	27.0	6.0	392.0	28133.0	1.530612244897959		-5.788415487779661	1.0	M1	1.0	23.922619047619047	-7.4898904806439095	GO:0015985	GO Biological Processes	19.0		energy coupled proton transport, down electrochemical gradient	15.948412698412698	0.0	0.0	0.0	GO:0015985	513|514|517|518|4508|10632	0.0	5.0	ATP5F1D|ATP5F1E|ATP5MC2|ATP5MC3|ATP6|ATP5MG	43	-3.5848463149316756		-5.788415487779661	19_GO:0051179 localization	43	0.6200692247512228			9.237612112194235
104	6.0	27.0	6.0	392.0	28133.0	1.530612244897959		-5.788415487779661	1.0	M1	1.0	23.922619047619047	-7.4898904806439095	GO:0015986	GO Biological Processes	19.0		ATP synthesis coupled proton transport	15.948412698412698	0.0	0.0	0.0	GO:0015986	513|514|517|518|4508|10632	0.0	5.0	ATP5F1D|ATP5F1E|ATP5MC2|ATP5MC3|ATP6|ATP5MG	44	-3.5848463149316756		-5.788415487779661	19_GO:0051179 localization	44	0.6200692247512228			9.237612112194235
105	13.0	187.0	13.0	392.0	28133.0	3.316326530612245		-5.60742827900541	1.0	M1	1.0	23.922619047619047	-7.4898904806439095	GO:0009168	GO Biological Processes	19.0		purine ribonucleoside monophosphate biosynthetic process	4.989209320091673	0.0	0.0	0.0	GO:0009168	204|226|230|513|514|517|518|2821|4508|5210|10632|10891|26330	0.0	5.0	AK2|ALDOA|ALDOC|ATP5F1D|ATP5F1E|ATP5MC2|ATP5MC3|GPI|ATP6|PFKFB4|ATP5MG|PPARGC1A|GAPDHS	45	-3.4246143277480443		-5.60742827900541	19_GO:0008152 metabolic process	45	0.9044033880268492			6.506240049258584
106	6.0	28.0	6.0	392.0	28133.0	1.530612244897959		-5.688794822732845	1.0	M1	1.0	15.378826530612244	-7.36480775086175	R-HSA-389957	Reactome Gene Sets	6.0		Prefoldin mediated transfer of substrate to CCT/TriC	15.378826530612244	0.0	0.0	0.0	R-HSA-389957	7277|7846|10471|10575|22948|84790	0.0	6.0	TUBA4A|TUBA1A|PFDN6|CCT4|CCT5|TUBA1C	46	-3.4942424682042352		-5.688794822732845		46	0.6200692247512228			9.048840785883119
107	6.0	32.0	6.0	392.0	28133.0	1.530612244897959		-5.328063179980031	1.0	M1	1.0	15.378826530612244	-7.36480775086175	R-HSA-389958	Reactome Gene Sets	6.0		Cooperation of Prefoldin and TriC/CCT in actin and tubulin folding	13.456473214285714	0.0	0.0	0.0	R-HSA-389958	7277|7846|10471|10575|22948|84790	0.0	6.0	TUBA4A|TUBA1A|PFDN6|CCT4|CCT5|TUBA1C	47	-3.1759838456988336		-5.328063179980031		47	0.6200692247512228			8.38091588461258
108	5.0	25.0	5.0	392.0	28133.0	1.2755102040816326		-4.66514737977872	1.0	M1	1.0	15.378826530612244	-7.36480775086175	R-HSA-389960	Reactome Gene Sets	6.0		Formation of tubulin folding intermediates by CCT/TriC	14.35357142857143	0.0	0.0	0.0	R-HSA-389960	7277|7846|10575|22948|84790	0.0	6.0	TUBA4A|TUBA1A|CCT4|CCT5|TUBA1C	48	-2.5872755367134		-4.66514737977872		48	0.566775911625211			7.940260438757922
109	8.0	101.0	8.0	392.0	28133.0	2.0408163265306123		-4.0628355112905945	1.0	M1	1.0	15.378826530612244	-7.36480775086175	R-HSA-391251	Reactome Gene Sets	6.0		Protein folding	5.684582743988686	0.0	0.0	0.0	R-HSA-391251	402|7277|7846|10471|10575|22948|26330|84790	0.0	6.0	ARL2|TUBA4A|TUBA1A|PFDN6|CCT4|CCT5|GAPDHS|TUBA1C	49	-2.0841415426891534		-4.0628355112905945		49	0.71413695124874			5.606435636228198
110	6.0	55.0	6.0	392.0	28133.0	1.530612244897959		-3.9402307985659997	1.0	M1	1.0	15.378826530612244	-7.36480775086175	WP2272	WikiPathways	27.0		Pathogenic Escherichia coli infection	7.829220779220779	0.0	0.0	0.0	WP2272	25|387|7277|7846|10094|84790	0.0	6.0	ABL1|RHOA|TUBA4A|TUBA1A|ARPC3|TUBA1C	50	-1.9946253523342043		-3.9402307985659997		50	0.6200692247512228			6.026313138625097
111	6.0	55.0	6.0	392.0	28133.0	1.530612244897959		-3.9402307985659997	1.0	M1	1.0	15.378826530612244	-7.36480775086175	ko05130	KEGG Pathway	24.0		Pathogenic Escherichia coli infection	7.829220779220779	0.0	0.0	0.0	ko05130	25|387|7277|7846|10094|84790	0.0	6.0	ABL1|RHOA|TUBA4A|TUBA1A|ARPC3|TUBA1C	51	-1.9946253523342043		-3.9402307985659997		51	0.6200692247512228			6.026313138625097
112	6.0	60.0	6.0	392.0	28133.0	1.530612244897959		-3.7283382585288547	1.0	M1	1.0	15.378826530612244	-7.36480775086175	hsa05130	KEGG Pathway	24.0		Pathogenic Escherichia coli infection	7.176785714285714	0.0	0.0	0.0	hsa05130	25|387|7277|7846|10094|84790	0.0	6.0	ABL1|RHOA|TUBA4A|TUBA1A|ARPC3|TUBA1C	52	-1.8320480100634635		-3.7283382585288547		52	0.6200692247512228			5.693456791510724
113	4.0	22.0	4.0	392.0	28133.0	1.0204081632653061		-3.6524951492763273	1.0	M1	1.0	15.378826530612244	-7.36480775086175	R-HSA-389977	Reactome Gene Sets	6.0		Post-chaperonin tubulin folding pathway	13.048701298701301	0.0	0.0	0.0	R-HSA-389977	402|7277|7846|84790	0.0	6.0	ARL2|TUBA4A|TUBA1A|TUBA1C	53	-1.7707111936829427		-3.6524951492763273		53	0.5075943249702668			6.720409118118253
114	5.0	43.0	5.0	392.0	28133.0	1.2755102040816326		-3.4963804921081376	1.0	M1	1.0	15.378826530612244	-7.36480775086175	R-HSA-9646399	Reactome Gene Sets	6.0		Aggrephagy	8.345099667774086	0.0	0.0	0.0	R-HSA-9646399	5116|7277|7334|7846|84790	0.0	6.0	PCNT|TUBA4A|UBE2N|TUBA1A|TUBA1C	54	-1.6599195153014104		-3.4963804921081376		54	0.566775911625211			5.7297850921484175
115	21.0	409.0	21.0	392.0	28133.0	5.357142857142857		-6.434575659851959	1.0	M1	1.0	4.457630878438332	-7.175874264605522	GO:0001558	GO Biological Processes	19.0		regulation of cell growth	3.6849022004889975	0.0	0.0	0.0	GO:0001558	25|207|323|551|694|1027|1627|4323|4722|5645|9175|9538|9798|10399|10501|11116|22999|23025|53335|55558|57446	0.0	7.0	ABL1|AKT1|APBB2|AVP|BTG1|CDKN1B|DBN1|MMP14|NDUFS3|PRSS2|MAP3K13|EI24|IST1|RACK1|SEMA6B|CEP43|RIMS1|UNC13A|BCL11A|PLXNA3|NDRG3	55	-4.179474170494868		-6.434575659851959	19_GO:0040007 growth	55	1.1372802614876918			6.501962516114595
116	24.0	648.0	24.0	392.0	28133.0	6.122448979591836		-4.788871918849035	1.0	M1	1.0	4.457630878438332	-7.175874264605522	GO:0040008	GO Biological Processes	19.0		regulation of growth	2.658068783068783	0.0	0.0	0.0	GO:0040008	25|207|323|551|694|1027|1444|1627|4323|4722|5645|9175|9538|9798|10399|10495|10501|11116|11221|22999|23025|53335|55558|57446	0.0	7.0	ABL1|AKT1|APBB2|AVP|BTG1|CDKN1B|CSHL1|DBN1|MMP14|NDUFS3|PRSS2|MAP3K13|EI24|IST1|RACK1|ENOX2|SEMA6B|CEP43|DUSP10|RIMS1|UNC13A|BCL11A|PLXNA3|NDRG3	56	-2.6924177982664177		-4.788871918849035	19_GO:0040007 growth	56	1.2108781141279994			5.076033233095715
117	10.0	161.0	10.0	392.0	28133.0	2.5510204081632653		-4.0339876654411135	1.0	M1	1.0	4.457630878438332	-7.175874264605522	GO:0030307	GO Biological Processes	19.0		positive regulation of cell growth	4.457630878438332	0.0	0.0	0.0	GO:0030307	207|551|1627|4323|5645|9175|9798|11116|22999|23025	0.0	7.0	AKT1|AVP|DBN1|MMP14|PRSS2|MAP3K13|IST1|CEP43|RIMS1|UNC13A	57	-2.0637030635605		-4.0339876654411135	19_GO:0040007 growth	57	0.7963474265091894			5.230125232903838
118	10.0	185.0	10.0	392.0	28133.0	2.5510204081632653		-3.5417882904425633	1.0	M1	1.0	4.457630878438332	-7.175874264605522	GO:0030308	GO Biological Processes	19.0		negative regulation of cell growth	3.8793436293436296	0.0	0.0	0.0	GO:0030308	323|694|1027|4722|9538|10399|10501|53335|55558|57446	0.0	7.0	APBB2|BTG1|CDKN1B|NDUFS3|EI24|RACK1|SEMA6B|BCL11A|PLXNA3|NDRG3	58	-1.6853102001139488		-3.5417882904425633	19_GO:0040007 growth	58	0.7963474265091894			4.670746279874346
119	11.0	245.0	11.0	392.0	28133.0	2.806122448979592		-3.1548323915543053	1.0	M1	1.0	4.457630878438332	-7.175874264605522	GO:0045926	GO Biological Processes	19.0		negative regulation of growth	3.2222303206997083	0.0	0.0	0.0	GO:0045926	323|694|1027|4722|9538|10399|10501|11221|53335|55558|57446	0.0	7.0	APBB2|BTG1|CDKN1B|NDUFS3|EI24|RACK1|SEMA6B|DUSP10|BCL11A|PLXNA3|NDRG3	59	-1.3892132482617154		-3.1548323915543053	19_GO:0040007 growth	59	0.8341222957905684			4.152844866569863
120	11.0	253.0	11.0	392.0	28133.0	2.806122448979592		-3.0407771389111766	1.0	M1	1.0	4.457630878438332	-7.175874264605522	GO:0045927	GO Biological Processes	19.0		positive regulation of growth	3.1203416149068324	0.0	0.0	0.0	GO:0045927	207|551|1444|1627|4323|5645|9175|9798|11116|22999|23025	0.0	7.0	AKT1|AVP|CSHL1|DBN1|MMP14|PRSS2|MAP3K13|IST1|CEP43|RIMS1|UNC13A	60	-1.2978219802545305		-3.0407771389111766	19_GO:0040007 growth	60	0.8341222957905684			4.027188839932791
121	14.0	289.0	14.0	392.0	28133.0	3.5714285714285716		-4.211557702674831	1.0	M1	1.0	3.87934362934363	-6.656937155231599	GO:0051961	GO Biological Processes	19.0		negative regulation of nervous system development	3.4766435986159174	0.0	0.0	0.0	GO:0051961	387|2290|3397|5087|6585|6662|7289|10501|11221|29116|29956|53335|55558|120892	0.0	8.0	RHOA|FOXG1|ID1|PBX1|SLIT1|SOX9|TULP3|SEMA6B|DUSP10|MYLIP|CERS2|BCL11A|PLXNA3|LRRK2	61	-2.212487974701672		-4.211557702674831	19_GO:0048519 negative regulation of biological process	61	0.9373047485139712			5.030705618414689
122	25.0	751.0	25.0	392.0	28133.0	6.377551020408164		-4.205626510602891	1.0	M1	1.0	3.87934362934363	-6.656937155231599	GO:0060322	GO Biological Processes	19.0		head development	2.389076469469279	0.0	0.0	0.0	GO:0060322	25|347|387|473|664|2290|2624|2904|3397|4323|4722|4724|5087|6453|6585|6662|7289|7546|10159|10891|23287|55558|57282|64651|120892	0.0	8.0	ABL1|APOD|RHOA|RERE|BNIP3|FOXG1|GATA2|GRIN2B|ID1|MMP14|NDUFS3|NDUFS4|PBX1|ITSN1|SLIT1|SOX9|TULP3|ZIC2|ATP6AP2|PPARGC1A|AGTPBP1|PLXNA3|SLC4A10|CSRNP1|LRRK2	62	-2.210333280181988		-4.205626510602891	19_GO:0032502 developmental process	62	1.234167017505837			4.586652330167292
123	11.0	210.0	11.0	392.0	28133.0	2.806122448979592		-3.721160161089825	1.0	M1	1.0	3.87934362934363	-6.656937155231599	GO:0045665	GO Biological Processes	19.0		negative regulation of neuron differentiation	3.759268707482993	0.0	0.0	0.0	GO:0045665	387|2290|3397|5087|6662|10501|29116|29956|53335|55558|120892	0.0	8.0	RHOA|FOXG1|ID1|PBX1|SOX9|SEMA6B|MYLIP|CERS2|BCL11A|PLXNA3|LRRK2	63	-1.8291225711308872		-3.721160161089825	19_GO:0048519 negative regulation of biological process	63	0.8341222957905684			4.770950235840721
124	12.0	269.0	12.0	392.0	28133.0	3.061224489795918		-3.366516393796735	1.0	M1	1.0	3.87934362934363	-6.656937155231599	GO:0050768	GO Biological Processes	19.0		negative regulation of neurogenesis	3.20154009559214	0.0	0.0	0.0	GO:0050768	387|2290|3397|5087|6662|10501|11221|29116|29956|53335|55558|120892	0.0	8.0	RHOA|FOXG1|ID1|PBX1|SOX9|SEMA6B|DUSP10|MYLIP|CERS2|BCL11A|PLXNA3|LRRK2	64	-1.550436610442868		-3.366516393796735	19_GO:0048519 negative regulation of biological process	64	0.8700682497312916			4.312839440771326
125	22.0	742.0	22.0	392.0	28133.0	5.612244897959184		-3.08976945211187	1.0	M1	1.0	3.87934362934363	-6.656937155231599	GO:0045596	GO Biological Processes	19.0		negative regulation of cell differentiation	2.127887947631883	0.0	0.0	0.0	GO:0045596	387|2290|2624|3397|3399|3685|4772|5087|6498|6662|6935|10501|11221|29116|29956|51043|53335|55558|84814|120892|144165|441478	0.0	8.0	RHOA|FOXG1|GATA2|ID1|ID3|ITGAV|NFATC1|PBX1|SKIL|SOX9|ZEB1|SEMA6B|DUSP10|MYLIP|CERS2|ZBTB7B|BCL11A|PLXNA3|PLPP7|LRRK2|PRICKLE1|NRARP	65	-1.3318371374855713		-3.08976945211187	19_GO:0048519 negative regulation of biological process	65	1.1624736084356109			3.701231471364203
126	21.0	710.0	21.0	392.0	28133.0	5.357142857142857		-2.9609986908100034	1.0	M1	1.0	3.87934362934363	-6.656937155231599	GO:0007420	GO Biological Processes	19.0		brain development	2.122711267605634	0.0	0.0	0.0	GO:0007420	25|347|387|473|664|2290|2624|2904|3397|4722|4724|5087|6453|6585|7289|7546|10891|23287|55558|57282|120892	0.0	8.0	ABL1|APOD|RHOA|RERE|BNIP3|FOXG1|GATA2|GRIN2B|ID1|NDUFS3|NDUFS4|PBX1|ITSN1|SLIT1|TULP3|ZIC2|PPARGC1A|AGTPBP1|PLXNA3|SLC4A10|LRRK2	66	-1.2385813768503218		-2.9609986908100034	19_GO:0032502 developmental process	66	1.1372802614876918			3.6018204166428496
127	8.0	148.0	8.0	392.0	28133.0	2.0408163265306123		-2.940506023297656	1.0	M1	1.0	3.87934362934363	-6.656937155231599	GO:0010977	GO Biological Processes	19.0		negative regulation of neuron projection development	3.87934362934363	0.0	0.0	0.0	GO:0010977	387|3397|10501|29116|29956|53335|55558|120892	0.0	8.0	RHOA|ID1|SEMA6B|MYLIP|CERS2|BCL11A|PLXNA3|LRRK2	67	-1.2257628298563323		-2.940506023297656	19_GO:0048519 negative regulation of biological process	67	0.71413695124874			4.17487985398852
128	9.0	184.0	9.0	392.0	28133.0	2.295918367346939		-2.934022117812427	1.0	M1	1.0	3.87934362934363	-6.656937155231599	GO:0031345	GO Biological Processes	19.0		negative regulation of cell projection organization	3.5103843167701867	0.0	0.0	0.0	GO:0031345	387|2904|3397|10501|29116|29956|53335|55558|120892	0.0	8.0	RHOA|GRIN2B|ID1|SEMA6B|MYLIP|CERS2|BCL11A|PLXNA3|LRRK2	68	-1.2206863821343683		-2.934022117812427	19_GO:0048519 negative regulation of biological process	68	0.756469706802007			4.06114288220621
129	12.0	314.0	12.0	392.0	28133.0	3.061224489795918		-2.785599662603151	1.0	M1	1.0	3.87934362934363	-6.656937155231599	GO:0010721	GO Biological Processes	19.0		negative regulation of cell development	2.7427206551410372	0.0	0.0	0.0	GO:0010721	387|2290|3397|5087|6662|10501|11221|29116|29956|53335|55558|120892	0.0	8.0	RHOA|FOXG1|ID1|PBX1|SOX9|SEMA6B|DUSP10|MYLIP|CERS2|BCL11A|PLXNA3|LRRK2	69	-1.1090317499779145		-2.785599662603151	19_GO:0048519 negative regulation of biological process	69	0.8700682497312916			3.6915106617410807
130	10.0	91.0	10.0	392.0	28133.0	2.5510204081632653		-6.23660383535724	1.0	M1	1.0	30.757653061224488	-6.421014797141004	hsa04260	KEGG Pathway	24.0		Cardiac muscle contraction	7.886577708006279	0.0	0.0	0.0	hsa04260	483|775|1337|1345|1347|1351|1537|5743|9377|84701	0.0	9.0	ATP1B3|CACNA1C|COX6A1|COX6C|COX7A2|COX8A|CYC1|PTGS2|COX5A|COX4I2	70	-3.994969920699957		-6.23660383535724		70	0.7963474265091894			7.821714104788729
131	9.0	78.0	9.0	392.0	28133.0	2.295918367346939		-5.850348750798201	1.0	M1	1.0	30.757653061224488	-6.421014797141004	ko04260	KEGG Pathway	24.0		Cardiac muscle contraction	8.280906593406595	0.0	0.0	0.0	ko04260	483|775|1337|1345|1347|1351|1537|9377|84701	0.0	9.0	ATP1B3|CACNA1C|COX6A1|COX6C|COX7A2|COX8A|CYC1|COX5A|COX4I2	71	-3.6375715761633916		-5.850348750798201		71	0.756469706802007			7.654378011703402
132	18.0	365.0	18.0	392.0	28133.0	4.591836734693878		-5.355220169163725	1.0	M1	1.0	30.757653061224488	-6.421014797141004	R-HSA-3700989	Reactome Gene Sets	6.0		Transcriptional Regulation by TP53	3.5392367906066537	0.0	0.0	0.0	R-HSA-3700989	207|900|1027|1337|1345|1351|2353|2821|2936|5052|5983|6921|8649|8795|9337|9377|57459|116228	0.0	9.0	AKT1|CCNG1|CDKN1B|COX6A1|COX6C|COX8A|FOS|GPI|GSR|PRDX1|RFC3|ELOC|LAMTOR3|TNFRSF10B|CNOT8|COX5A|GATAD2B|COX20	72	-3.2004349415066025		-5.355220169163725		72	1.0571654303469598			5.804430499945833
133	6.0	35.0	6.0	392.0	28133.0	1.530612244897959		-5.090244629817764	1.0	M1	1.0	30.757653061224488	-6.421014797141004	WP4922	WikiPathways	27.0		Mitochondrial CIV Assembly	12.303061224489795	0.0	0.0	0.0	WP4922	1337|1345|1347|1351|9377|116228	0.0	9.0	COX6A1|COX6C|COX7A2|COX8A|COX5A|COX20	73	-2.971888667787317		-5.090244629817764		73	0.6200692247512228			7.953800246484363
134	5.0	21.0	5.0	392.0	28133.0	1.2755102040816326		-5.062020083203254	1.0	M1	1.0	30.757653061224488	-6.421014797141004	GO:0006123	GO Biological Processes	19.0		mitochondrial electron transport, cytochrome c to oxygen	17.087585034013607	0.0	0.0	0.0	GO:0006123	1337|1345|1351|9377|84701	0.0	9.0	COX6A1|COX6C|COX8A|COX5A|COX4I2	74	-2.948627540704356		-5.062020083203254	19_GO:0008152 metabolic process	74	0.566775911625211			8.766715490533095
135	5.0	21.0	5.0	392.0	28133.0	1.2755102040816326		-5.062020083203254	1.0	M1	1.0	30.757653061224488	-6.421014797141004	GO:0019646	GO Biological Processes	19.0		aerobic electron transport chain	17.087585034013607	0.0	0.0	0.0	GO:0019646	1337|1345|1351|9377|84701	0.0	9.0	COX6A1|COX6C|COX8A|COX5A|COX4I2	75	-2.948627540704356		-5.062020083203254	19_GO:0008152 metabolic process	75	0.566775911625211			8.766715490533095
136	3.0	7.0	3.0	392.0	28133.0	0.7653061224489796		-4.045099218535301	1.0	M1	1.0	30.757653061224488	-6.421014797141004	WP678	WikiPathways	27.0		Arachidonate Epoxygenase / Epoxide Hydrolase	30.757653061224488	0.0	0.0	0.0	WP678	1351|2950|9377	0.0	9.0	COX8A|GSTP1|COX5A	76	-2.0700093742026855		-4.045099218535301		76	0.4401556971275934			9.360003079201253
137	7.0	86.0	7.0	392.0	28133.0	1.7857142857142858		-3.694966442437834	1.0	M1	1.0	30.757653061224488	-6.421014797141004	GO:0009060	GO Biological Processes	19.0		aerobic respiration	5.841569767441861	0.0	0.0	0.0	GO:0009060	513|664|1337|1345|1351|9377|84701	0.0	9.0	ATP5F1D|BNIP3|COX6A1|COX6C|COX8A|COX5A|COX4I2	77	-1.8044085625369441		-3.694966442437834	19_GO:0008152 metabolic process	77	0.6688831939860661			5.345329661526442
138	13.0	191.0	13.0	392.0	28133.0	3.316326530612245		-5.505681101759122	1.0	M1	1.0	4.884723261032161	-5.957453799995849	GO:0050821	GO Biological Processes	19.0		protein stabilization	4.884723261032161	0.0	0.0	0.0	GO:0050821	483|819|1409|3916|6125|7320|8863|10575|10891|11235|22948|51125|56926	0.0	10.0	ATP1B3|CAMLG|CRYAA|LAMP1|RPL5|UBE2B|PER3|CCT4|PPARGC1A|PDCD10|CCT5|GOLGA7|NCLN	78	-3.334296612282538		-5.505681101759122	19_GO:0065007 biological regulation	78	0.9044033880268492			6.4036901107068065
139	4.0	10.0	4.0	392.0	28133.0	1.0204081632653061		-5.136957609175915	1.0	M1	1.0	43.06071428571428	-5.879844724302334	GO:0048755	GO Biological Processes	19.0		branching morphogenesis of a nerve	28.707142857142863	0.0	0.0	0.0	GO:0048755	473|9175|53335|120892	0.0	11.0	RERE|MAP3K13|BCL11A|LRRK2	79	-3.0085013202411415		-5.136957609175915	19_GO:0032502 developmental process	79	0.5075943249702668			10.417012905401558
140	3.0	5.0	3.0	392.0	28133.0	0.7653061224489796		-4.580126946176903	1.0	M1	1.0	43.06071428571428	-5.879844724302334	GO:2000172	GO Biological Processes	19.0		regulation of branching morphogenesis of a nerve	43.06071428571428	0.0	0.0	0.0	GO:2000172	9175|53335|120892	0.0	11.0	MAP3K13|BCL11A|LRRK2	80	-2.515687962025449		-4.580126946176903	19_GO:0032502 developmental process	80	0.4401556971275934			11.180841756068778
141	9.0	152.0	9.0	392.0	28133.0	2.295918367346939		-3.531080834177159	1.0	M1	1.0	43.06071428571428	-5.879844724302334	GO:0071695	GO Biological Processes	19.0		anatomical structure maturation	4.249412593984963	0.0	0.0	0.0	GO:0071695	387|473|8642|9175|10159|10365|53335|79670|120892	0.0	11.0	RHOA|RERE|DCHS1|MAP3K13|ATP6AP2|KLF2|BCL11A|TUT7|LRRK2	81	-1.6800662265883515		-3.531080834177159	19_GO:0032502 developmental process	81	0.756469706802007			4.775043357068382
142	3.0	10.0	3.0	392.0	28133.0	0.7653061224489796		-3.523523414512705	1.0	M1	1.0	43.06071428571428	-5.879844724302334	GO:0014041	GO Biological Processes	19.0		regulation of neuron maturation	21.53035714285714	0.0	0.0	0.0	GO:0014041	9175|53335|120892	0.0	11.0	MAP3K13|BCL11A|LRRK2	82	-1.6800662265883515		-3.523523414512705	19_GO:0032502 developmental process	82	0.4401556971275934			7.718767554356903
143	10.0	186.0	10.0	392.0	28133.0	2.5510204081632653		-3.5230975931897195	1.0	M1	1.0	43.06071428571428	-5.879844724302334	GO:0001763	GO Biological Processes	19.0		morphogenesis of a branching structure	3.8584869431643627	0.0	0.0	0.0	GO:0001763	25|473|4323|5087|6662|8642|9175|53335|120892|441478	0.0	11.0	ABL1|RERE|MMP14|PBX1|SOX9|DCHS1|MAP3K13|BCL11A|LRRK2|NRARP	83	-1.6800662265883515		-3.5230975931897195	19_GO:0032502 developmental process	83	0.7963474265091894			4.649511959678633
144	5.0	48.0	5.0	392.0	28133.0	1.2755102040816326		-3.2709655965050164	1.0	M1	1.0	43.06071428571428	-5.879844724302334	GO:0060688	GO Biological Processes	19.0		regulation of morphogenesis of a branching structure	7.4758184523809526	0.0	0.0	0.0	GO:0060688	25|6662|9175|53335|120892	0.0	11.0	ABL1|SOX9|MAP3K13|BCL11A|LRRK2	84	-1.478587949397821		-3.2709655965050164	19_GO:0032502 developmental process	84	0.566775911625211			5.337776080850965
145	3.0	22.0	3.0	392.0	28133.0	0.7653061224489796		-2.4690526226241274	1.0	M1	1.0	43.06071428571428	-5.879844724302334	GO:1903429	GO Biological Processes	19.0		regulation of cell maturation	9.786525974025974	0.0	0.0	0.0	GO:1903429	9175|53335|120892	0.0	11.0	MAP3K13|BCL11A|LRRK2	85	-0.8747635722082368		-2.4690526226241274	19_GO:0032502 developmental process	85	0.4401556971275934			4.900864234952175
146	5.0	89.0	5.0	392.0	28133.0	1.2755102040816326		-2.0874798376177606	1.0	M1	1.0	43.06071428571428	-5.879844724302334	GO:0060993	GO Biological Processes	19.0		kidney morphogenesis	4.031902086677368	0.0	0.0	0.0	GO:0060993	5087|6662|8642|120892|153572	0.0	11.0	PBX1|SOX9|DCHS1|LRRK2|IRX2	86	-0.6206547028359434		-2.0874798376177606	19_GO:0032502 developmental process	86	0.566775911625211			3.4054340784544785
147	22.0	511.0	22.0	392.0	28133.0	5.612244897959184		-5.44608373072883	1.0	M1	1.0	7.689413265306122	-5.761058396208129	GO:0022613	GO Biological Processes	19.0		ribonucleoprotein complex biogenesis	3.089809896561364	0.0	0.0	0.0	GO:0022613	3646|6125|6130|6155|6169|6217|6227|8664|10146|23521|27258|29889|51001|51116|51187|51202|51504|54433|55164|55651|90121|285855	0.0	12.0	EIF3E|RPL5|RPL7A|RPL27|RPL38|RPS16|RPS21|EIF3D|G3BP1|RPL13A|LSM3|GNL2|MTERF3|MRPS2|RSL24D1|DDX47|TRMT112|GAR1|SHQ1|NHP2|TSR2|RPL7L1	87	-3.2830781728250167		-5.44608373072883	19_GO:0071840 cellular component organization or biogenesis	87	1.1624736084356109			5.667244541077263
148	12.0	228.0	12.0	392.0	28133.0	3.061224489795918		-4.027788903366812	1.0	M1	1.0	7.689413265306122	-5.761058396208129	GO:0006364	GO Biological Processes	19.0		rRNA processing	3.7772556390977443	0.0	0.0	0.0	GO:0006364	6125|6130|6155|6217|6227|51202|51504|54433|55164|55651|90121|285855	0.0	12.0	RPL5|RPL7A|RPL27|RPS16|RPS21|DDX47|TRMT112|GAR1|SHQ1|NHP2|TSR2|RPL7L1	88	-2.0615806463134305		-4.027788903366812	19_GO:0071840 cellular component organization or biogenesis	88	0.8700682497312916			5.005235878814217
149	12.0	265.0	12.0	392.0	28133.0	3.061224489795918		-3.424788615216917	1.0	M1	1.0	7.689413265306122	-5.761058396208129	GO:0016072	GO Biological Processes	19.0		rRNA metabolic process	3.249865229110512	0.0	0.0	0.0	GO:0016072	6125|6130|6155|6217|6227|51202|51504|54433|55164|55651|90121|285855	0.0	12.0	RPL5|RPL7A|RPL27|RPS16|RPS21|DDX47|TRMT112|GAR1|SHQ1|NHP2|TSR2|RPL7L1	89	-1.5985215235411057		-3.424788615216917	19_GO:0008152 metabolic process	89	0.8700682497312916			4.3743025880355075
150	6.0	72.0	6.0	392.0	28133.0	1.530612244897959		-3.2948731643907636	1.0	M1	1.0	7.689413265306122	-5.761058396208129	GO:0042273	GO Biological Processes	19.0		ribosomal large subunit biogenesis	5.980654761904762	0.0	0.0	0.0	GO:0042273	6125|6130|6169|51187|55651|285855	0.0	12.0	RPL5|RPL7A|RPL38|RSL24D1|NHP2|RPL7L1	90	-1.4934751559833743		-3.2948731643907636	19_GO:0071840 cellular component organization or biogenesis	90	0.6200692247512228			5.030178508314353
151	14.0	400.0	14.0	392.0	28133.0	3.5714285714285716		-2.7965235410793996	1.0	M1	1.0	7.689413265306122	-5.761058396208129	GO:0034470	GO Biological Processes	19.0		ncRNA processing	2.5118750000000003	0.0	0.0	0.0	GO:0034470	6125|6130|6155|6217|6227|51202|51504|54433|55164|55651|79670|90121|283989|285855	0.0	12.0	RPL5|RPL7A|RPL27|RPS16|RPS21|DDX47|TRMT112|GAR1|SHQ1|NHP2|TUT7|TSR2|TSEN54|RPL7L1	91	-1.1143119403912192		-2.7965235410793996	19_GO:0008152 metabolic process	91	0.9373047485139712			3.620176436459331
152	3.0	28.0	3.0	392.0	28133.0	0.7653061224489796		-2.167992294187943	1.0	M1	1.0	7.689413265306122	-5.761058396208129	GO:0000470	GO Biological Processes	19.0		maturation of LSU-rRNA	7.689413265306122	0.0	0.0	0.0	GO:0000470	6130|55651|285855	0.0	12.0	RPL7A|NHP2|RPL7L1	92	-0.6753744229590906		-2.167992294187943	19_GO:0071840 cellular component organization or biogenesis	92	0.4401556971275934			4.209761864771048
153	16.0	580.0	16.0	392.0	28133.0	4.081632653061225		-2.103681073615297	1.0	M1	1.0	7.689413265306122	-5.761058396208129	GO:0034660	GO Biological Processes	19.0		ncRNA metabolic process	1.979802955665025	0.0	0.0	0.0	GO:0034660	6125|6130|6155|6217|6227|6667|51091|51202|51504|54433|55164|55651|79670|90121|283989|285855	0.0	12.0	RPL5|RPL7A|RPL27|RPS16|RPS21|SP1|SEPSECS|DDX47|TRMT112|GAR1|SHQ1|NHP2|TUT7|TSR2|TSEN54|RPL7L1	93	-0.6307022031036809		-2.103681073615297	19_GO:0008152 metabolic process	93	0.9993665598252253			2.834331070265971
154	3.0	10.0	3.0	392.0	28133.0	0.7653061224489796		-3.523523414512705	1.0	M1	1.0	22.427455357142858	-5.705339985653938	CORUM:2904	CORUM	33.0		Respiratory chain complex I (intermediate VII/650kD), mitochondrial	21.53035714285714	0.0	0.0	0.0	CORUM:2904	4722|4724|4729	0.0	13.0	NDUFS3|NDUFS4|NDUFV2	94	-1.6800662265883515		-3.523523414512705		94	0.4401556971275934			7.718767554356903
155	3.0	11.0	3.0	392.0	28133.0	0.7653061224489796		-3.3897269970901376	1.0	M1	1.0	22.427455357142858	-5.705339985653938	CORUM:2905	CORUM	33.0		Respiratory chain complex I (intermediate), mitochondrial	19.573051948051948	0.0	0.0	0.0	CORUM:2905	4722|4724|4729	0.0	13.0	NDUFS3|NDUFS4|NDUFV2	95	-1.569897885569867		-3.3897269970901376		95	0.4401556971275934			7.323839120331457
156	3.0	11.0	3.0	392.0	28133.0	0.7653061224489796		-3.3897269970901376	1.0	M1	1.0	22.427455357142858	-5.705339985653938	CORUM:2948	CORUM	33.0		Respiratory chain complex I (incomplete intermediate), mitochondrial	19.573051948051948	0.0	0.0	0.0	CORUM:2948	4705|4724|4729	0.0	13.0	NDUFA10|NDUFS4|NDUFV2	96	-1.569897885569867		-3.3897269970901376		96	0.4401556971275934			7.323839120331457
157	8.0	77.0	8.0	392.0	28133.0	2.0408163265306123		-4.919428327520376	1.0	M1	1.0	7.4564007421150285	-5.670772509489572	GO:0002088	GO Biological Processes	19.0		lens development in camera-type eye	7.4564007421150285	0.0	0.0	0.0	GO:0002088	1412|1414|1415|1418|1420|3982|6498|155051	0.0	14.0	CRYBA2|CRYBB1|CRYBB2|CRYGA|CRYGC|LIM2|SKIL|CRYGN	97	-2.8182016920765136		-4.919428327520376	19_GO:0032502 developmental process	97	0.71413695124874			6.743808767575386
158	16.0	359.0	16.0	392.0	28133.0	4.081632653061225		-4.294762005327102	1.0	M1	1.0	7.4564007421150285	-5.670772509489572	GO:0001654	GO Biological Processes	19.0		eye development	3.1985674492638285	0.0	0.0	0.0	GO:0001654	93|775|1412|1414|1415|1418|1420|3982|5087|6498|6662|7289|23287|84440|155051|388552	0.0	14.0	ACVR2B|CACNA1C|CRYBA2|CRYBB1|CRYBB2|CRYGA|CRYGC|LIM2|PBX1|SKIL|SOX9|TULP3|AGTPBP1|RAB11FIP4|CRYGN|BLOC1S3	98	-2.2802490686991654		-4.294762005327102	19_GO:0032502 developmental process	98	0.9993665598252253			4.983679259807555
159	16.0	363.0	16.0	392.0	28133.0	4.081632653061225		-4.237940137732558	1.0	M1	1.0	7.4564007421150285	-5.670772509489572	GO:0150063	GO Biological Processes	19.0		visual system development	3.163321526957891	0.0	0.0	0.0	GO:0150063	93|775|1412|1414|1415|1418|1420|3982|5087|6498|6662|7289|23287|84440|155051|388552	0.0	14.0	ACVR2B|CACNA1C|CRYBA2|CRYBB1|CRYBB2|CRYGA|CRYGC|LIM2|PBX1|SKIL|SOX9|TULP3|AGTPBP1|RAB11FIP4|CRYGN|BLOC1S3	99	-2.2292829457536736		-4.237940137732558	19_GO:0032502 developmental process	99	0.9993665598252253			4.9313829157290465
160	16.0	369.0	16.0	392.0	28133.0	4.081632653061225		-4.1543448484611645	1.0	M1	1.0	7.4564007421150285	-5.670772509489572	GO:0048880	GO Biological Processes	19.0		sensory system development	3.1118854045683317	0.0	0.0	0.0	GO:0048880	93|775|1412|1414|1415|1418|1420|3982|5087|6498|6662|7289|23287|84440|155051|388552	0.0	14.0	ACVR2B|CACNA1C|CRYBA2|CRYBB1|CRYBB2|CRYGA|CRYGC|LIM2|PBX1|SKIL|SOX9|TULP3|AGTPBP1|RAB11FIP4|CRYGN|BLOC1S3	100	-2.1609276230390173		-4.1543448484611645	19_GO:0032502 developmental process	100	0.9993665598252253			4.854279691381517
161	11.0	215.0	11.0	392.0	28133.0	2.806122448979592		-3.632747335375943	1.0	M1	1.0	7.4564007421150285	-5.670772509489572	GO:0007601	GO Biological Processes	19.0		visual perception	3.6718438538205977	0.0	0.0	0.0	GO:0007601	1409|1412|1414|1415|1418|1420|7546|22999|57282|84140|155051	0.0	14.0	CRYAA|CRYBA2|CRYBB1|CRYBB2|CRYGA|CRYGC|ZIC2|RIMS1|SLC4A10|FAM161A|CRYGN	101	-1.7524086206567393		-3.632747335375943	19_GO:0032501 multicellular organismal process	101	0.8341222957905684			4.674879640395258
162	11.0	219.0	11.0	392.0	28133.0	2.806122448979592		-3.56396561657263	1.0	M1	1.0	7.4564007421150285	-5.670772509489572	GO:0050953	GO Biological Processes	19.0		sensory perception of light stimulus	3.604778212654925	0.0	0.0	0.0	GO:0050953	1409|1412|1414|1415|1418|1420|7546|22999|57282|84140|155051	0.0	14.0	CRYAA|CRYBA2|CRYBB1|CRYBB2|CRYGA|CRYGC|ZIC2|RIMS1|SLC4A10|FAM161A|CRYGN	102	-1.6992150002780255		-3.56396561657263	19_GO:0032501 multicellular organismal process	102	0.8341222957905684			4.600065892481985
163	13.0	304.0	13.0	392.0	28133.0	3.316326530612245		-3.424672354861655	1.0	M1	1.0	7.4564007421150285	-5.670772509489572	GO:0043010	GO Biological Processes	19.0		camera-type eye development	3.0690202067669174	0.0	0.0	0.0	GO:0043010	93|775|1412|1414|1415|1418|1420|3982|6498|6662|7289|84440|155051	0.0	14.0	ACVR2B|CACNA1C|CRYBA2|CRYBB1|CRYBB2|CRYGA|CRYGC|LIM2|SKIL|SOX9|TULP3|RAB11FIP4|CRYGN	103	-1.5985215235411057		-3.424672354861655	19_GO:0032502 developmental process	103	0.9044033880268492			4.311565669915732
164	9.0	176.0	9.0	392.0	28133.0	2.295918367346939		-3.069772299887514	1.0	M1	1.0	7.360805860805862	-5.4241088540044595	GO:0043534	GO Biological Processes	19.0		blood vessel endothelial cell migration	3.6699472402597406	0.0	0.0	0.0	GO:0043534	25|207|387|2624|2876|3397|5743|6667|11235	0.0	15.0	ABL1|AKT1|RHOA|GATA2|GPX1|ID1|PTGS2|SP1|PDCD10	104	-1.3183221127891354		-3.069772299887514	19_GO:0040011 locomotion	104	0.756469706802007			4.223728673270303
165	13.0	358.0	13.0	392.0	28133.0	3.316326530612245		-2.774686289901591	1.0	M1	1.0	7.360805860805862	-5.4241088540044595	GO:0010631	GO Biological Processes	19.0		epithelial cell migration	2.6060953711093378	0.0	0.0	0.0	GO:0010631	25|207|387|2624|2821|2876|3397|5743|6662|6667|9839|11221|11235	0.0	15.0	ABL1|AKT1|RHOA|GATA2|GPI|GPX1|ID1|PTGS2|SOX9|SP1|ZEB2|DUSP10|PDCD10	105	-1.099728210340056		-2.774686289901591	19_GO:0040011 locomotion	105	0.9044033880268492			3.635533004449634
166	13.0	361.0	13.0	392.0	28133.0	3.316326530612245		-2.742861456150536	1.0	M1	1.0	7.360805860805862	-5.4241088540044595	GO:0090132	GO Biological Processes	19.0		epithelium migration	2.5844380688563513	0.0	0.0	0.0	GO:0090132	25|207|387|2624|2821|2876|3397|5743|6662|6667|9839|11221|11235	0.0	15.0	ABL1|AKT1|RHOA|GATA2|GPI|GPX1|ID1|PTGS2|SOX9|SP1|ZEB2|DUSP10|PDCD10	106	-1.072136034575077		-2.742861456150536	19_GO:0032501 multicellular organismal process	106	0.9044033880268492			3.601700307124501
167	6.0	93.0	6.0	392.0	28133.0	1.530612244897959		-2.712501818290245	1.0	M1	1.0	7.360805860805862	-5.4241088540044595	GO:0002042	GO Biological Processes	19.0		cell migration involved in sprouting angiogenesis	4.630184331797235	0.0	0.0	0.0	GO:0002042	25|207|387|2624|5743|11235	0.0	15.0	ABL1|AKT1|RHOA|GATA2|PTGS2|PDCD10	107	-1.0525666123132167		-2.712501818290245	19_GO:0040011 locomotion	107	0.6200692247512228			4.168342815986193
168	13.0	366.0	13.0	392.0	28133.0	3.316326530612245		-2.690703716065702	1.0	M1	1.0	7.360805860805862	-5.4241088540044595	GO:0090130	GO Biological Processes	19.0		tissue migration	2.549131537861046	0.0	0.0	0.0	GO:0090130	25|207|387|2624|2821|2876|3397|5743|6662|6667|9839|11221|11235	0.0	15.0	ABL1|AKT1|RHOA|GATA2|GPI|GPX1|ID1|PTGS2|SOX9|SP1|ZEB2|DUSP10|PDCD10	108	-1.037662218036574		-2.690703716065702	19_GO:0032501 multicellular organismal process	108	0.9044033880268492			3.546064573878989
169	4.0	39.0	4.0	392.0	28133.0	1.0204081632653061		-2.6825261420863105	1.0	M1	1.0	7.360805860805862	-5.4241088540044595	GO:0045746	GO Biological Processes	19.0		negative regulation of Notch signaling pathway	7.360805860805862	0.0	0.0	0.0	GO:0045746	207|2624|4323|441478	0.0	15.0	AKT1|GATA2|MMP14|NRARP	109	-1.032041831907976		-2.6825261420863105	19_GO:0048519 negative regulation of biological process	109	0.5075943249702668			4.7251971873853025
170	15.0	474.0	15.0	392.0	28133.0	3.826530612244898		-2.535947123407388	1.0	M1	1.0	7.360805860805862	-5.4241088540044595	GO:0001667	GO Biological Processes	19.0		ameboidal-type cell migration	2.271134719710669	0.0	0.0	0.0	GO:0001667	25|207|387|397|2624|2821|2876|3397|5743|6662|6667|9839|10501|11221|11235	0.0	15.0	ABL1|AKT1|RHOA|ARHGDIB|GATA2|GPI|GPX1|ID1|PTGS2|SOX9|SP1|ZEB2|SEMA6B|DUSP10|PDCD10	110	-0.9134384153709834		-2.535947123407388	19_GO:0040011 locomotion	110	0.9689184016869838			3.3177586991615486
171	21.0	786.0	21.0	392.0	28133.0	5.357142857142857		-2.4365130959243895	1.0	M1	1.0	7.360805860805862	-5.4241088540044595	GO:0001944	GO Biological Processes	19.0		vasculature development	1.9174618320610688	0.0	0.0	0.0	GO:0001944	25|93|207|347|387|694|1944|2624|2876|3397|3685|4323|4772|5743|6667|7541|10365|11235|144165|219699|441478	0.0	15.0	ABL1|ACVR2B|AKT1|APOD|RHOA|BTG1|EFNA3|GATA2|GPX1|ID1|ITGAV|MMP14|NFATC1|PTGS2|SP1|ZBTB14|KLF2|PDCD10|PRICKLE1|UNC5B|NRARP	111	-0.8564823576140819		-2.4365130959243895	19_GO:0032502 developmental process	111	1.1372802614876918			3.1011781495679887
172	21.0	786.0	21.0	392.0	28133.0	5.357142857142857		-2.4365130959243895	1.0	M1	1.0	7.360805860805862	-5.4241088540044595	GO:0072358	GO Biological Processes	19.0		cardiovascular system development	1.9174618320610688	0.0	0.0	0.0	GO:0072358	25|93|207|347|387|694|1944|2624|2876|3397|3685|4323|4772|5743|6667|7541|10365|11235|144165|219699|441478	0.0	15.0	ABL1|ACVR2B|AKT1|APOD|RHOA|BTG1|EFNA3|GATA2|GPX1|ID1|ITGAV|MMP14|NFATC1|PTGS2|SP1|ZBTB14|KLF2|PDCD10|PRICKLE1|UNC5B|NRARP	112	-0.8564823576140819		-2.4365130959243895	19_GO:0032502 developmental process	112	1.1372802614876918			3.1011781495679887
173	23.0	590.0	23.0	392.0	28133.0	5.86734693877551		-4.963059364371229	1.0	M1	1.0	9.786525974025974	-5.191731136073756	GO:0009792	GO Biological Processes	19.0		embryo development ending in birth or egg hatching	2.797730024213075	0.0	0.0	0.0	GO:0009792	25|207|1051|1603|1627|2624|3633|4323|5087|6498|6662|7289|7320|8642|10159|10365|54880|55845|144165|201895|285855|338596|441478	0.0	16.0	ABL1|AKT1|CEBPB|DAD1|DBN1|GATA2|INPP5B|MMP14|PBX1|SKIL|SOX9|TULP3|UBE2B|DCHS1|ATP6AP2|KLF2|BCOR|BRK1|PRICKLE1|SMIM14|RPL7L1|ST8SIA6|NRARP	113	-2.8570071850380745		-4.963059364371229	19_GO:0032502 developmental process	113	1.1869925701863226			5.2459861320888095
174	14.0	333.0	14.0	392.0	28133.0	3.5714285714285716		-3.569741360705126	1.0	M1	1.0	9.786525974025974	-5.191731136073756	GO:0001701	GO Biological Processes	19.0		in utero embryonic development	3.017267267267268	0.0	0.0	0.0	GO:0001701	207|1051|1603|1627|2624|3633|6498|7320|10365|54880|55845|201895|285855|338596	0.0	16.0	AKT1|CEBPB|DAD1|DBN1|GATA2|INPP5B|SKIL|UBE2B|KLF2|BCOR|BRK1|SMIM14|RPL7L1|ST8SIA6	114	-1.7021978442263515		-3.569741360705126	19_GO:0032502 developmental process	114	0.9373047485139712			4.401953414092051
175	6.0	88.0	6.0	392.0	28133.0	1.530612244897959		-2.835485061761051	1.0	M1	1.0	9.786525974025974	-5.191731136073756	GO:0001824	GO Biological Processes	19.0		blastocyst development	4.893262987012987	0.0	0.0	0.0	GO:0001824	1603|6498|54880|201895|285855|338596	0.0	16.0	DAD1|SKIL|BCOR|SMIM14|RPL7L1|ST8SIA6	115	-1.1430978320028848		-2.835485061761051	19_GO:0032502 developmental process	115	0.6200692247512228			4.348201250358048
176	3.0	22.0	3.0	392.0	28133.0	0.7653061224489796		-2.4690526226241274	1.0	M1	1.0	9.786525974025974	-5.191731136073756	GO:0001835	GO Biological Processes	19.0		blastocyst hatching	9.786525974025974	0.0	0.0	0.0	GO:0001835	54880|201895|338596	0.0	16.0	BCOR|SMIM14|ST8SIA6	116	-0.8747635722082368		-2.4690526226241274	19_GO:0032502 developmental process	116	0.4401556971275934			4.900864234952175
177	3.0	22.0	3.0	392.0	28133.0	0.7653061224489796		-2.4690526226241274	1.0	M1	1.0	9.786525974025974	-5.191731136073756	GO:0035188	GO Biological Processes	19.0		hatching	9.786525974025974	0.0	0.0	0.0	GO:0035188	54880|201895|338596	0.0	16.0	BCOR|SMIM14|ST8SIA6	117	-0.8747635722082368		-2.4690526226241274	19_GO:0032502 developmental process	117	0.4401556971275934			4.900864234952175
178	3.0	22.0	3.0	392.0	28133.0	0.7653061224489796		-2.4690526226241274	1.0	M1	1.0	9.786525974025974	-5.191731136073756	GO:0071684	GO Biological Processes	19.0		organism emergence from protective structure	9.786525974025974	0.0	0.0	0.0	GO:0071684	54880|201895|338596	0.0	16.0	BCOR|SMIM14|ST8SIA6	118	-0.8747635722082368		-2.4690526226241274	19_GO:0032501 multicellular organismal process	118	0.4401556971275934			4.900864234952175
179	6.0	43.0	6.0	392.0	28133.0	1.530612244897959		-4.556335400725534	1.0	M1	1.0	12.664915966386554	-5.16680836133359	GO:0045454	GO Biological Processes	19.0		cell redox homeostasis	10.014119601328902	0.0	0.0	0.0	GO:0045454	2876|2936|5052|23071|25828|51714	0.0	17.0	GPX1|GSR|PRDX1|ERP44|TXN2|SELENOT	119	-2.4962832668221937		-4.556335400725534	19_GO:0050789 regulation of biological process	119	0.6200692247512228			7.031758648169478
180	8.0	90.0	8.0	392.0	28133.0	2.0408163265306123		-4.421367881523942	1.0	M1	1.0	12.664915966386554	-5.16680836133359	WP15	WikiPathways	27.0		Selenium Micronutrient Network	6.379365079365081	0.0	0.0	0.0	WP15	2876|2936|3039|5052|5743|9403|22928|51714	0.0	17.0	GPX1|GSR|HBA1|PRDX1|PTGS2|SELENOF|SEPHS2|SELENOT	120	-2.3826089573219487		-4.421367881523942		120	0.71413695124874			6.07606372189506
181	8.0	106.0	8.0	392.0	28133.0	2.0408163265306123		-3.9151552035956123	1.0	M1	1.0	12.664915966386554	-5.16680836133359	GO:0098869	GO Biological Processes	19.0		cellular oxidant detoxification	5.416442048517521	0.0	0.0	0.0	GO:0098869	2876|2936|2950|3039|4257|5052|5743|51714	0.0	17.0	GPX1|GSR|GSTP1|HBA1|MGST1|PRDX1|PTGS2|SELENOT	121	-1.9832015629071198		-3.9151552035956123	19_GO:0098754 detoxification	121	0.71413695124874			5.415261629323696
182	5.0	37.0	5.0	392.0	28133.0	1.2755102040816326		-3.8107211500294564	1.0	M1	1.0	12.664915966386554	-5.16680836133359	R-HSA-3299685	Reactome Gene Sets	6.0		Detoxification of Reactive Oxygen Species	9.698359073359073	0.0	0.0	0.0	R-HSA-3299685	2876|2936|2950|5052|25828	0.0	17.0	GPX1|GSR|GSTP1|PRDX1|TXN2	122	-1.9032008877150683		-3.8107211500294564		122	0.566775911625211			6.293586828588574
183	8.0	119.0	8.0	392.0	28133.0	2.0408163265306123		-3.568036373507884	1.0	M1	1.0	12.664915966386554	-5.16680836133359	GO:1990748	GO Biological Processes	19.0		cellular detoxification	4.824729891956784	0.0	0.0	0.0	GO:1990748	2876|2936|2950|3039|4257|5052|5743|51714	0.0	17.0	GPX1|GSR|GSTP1|HBA1|MGST1|PRDX1|PTGS2|SELENOT	123	-1.7018915522216742		-3.568036373507884	19_GO:0098754 detoxification	123	0.71413695124874			4.970143983667457
184	8.0	136.0	8.0	392.0	28133.0	2.0408163265306123		-3.179412031893281	1.0	M1	1.0	12.664915966386554	-5.16680836133359	GO:0098754	GO Biological Processes	19.0		detoxification	4.221638655462185	0.0	0.0	0.0	GO:0098754	2876|2936|2950|3039|4257|5052|5743|51714	0.0	17.0	GPX1|GSR|GSTP1|HBA1|MGST1|PRDX1|PTGS2|SELENOT	124	-1.4048380459477647		-3.179412031893281	19_GO:0098754 detoxification	124	0.71413695124874			4.476852799279596
185	3.0	17.0	3.0	392.0	28133.0	0.7653061224489796		-2.8016742226606093	1.0	M1	1.0	12.664915966386554	-5.16680836133359	GO:0033194	GO Biological Processes	19.0		response to hydroperoxide	12.664915966386554	0.0	0.0	0.0	GO:0033194	2876|4257|6667	0.0	17.0	GPX1|MGST1|SP1	125	-1.1185473540216473		-2.8016742226606093	19_GO:0050896 response to stimulus	125	0.4401556971275934			5.7188879771564745
186	4.0	54.0	4.0	392.0	28133.0	1.0204081632653061		-2.1685157974376903	1.0	M1	1.0	12.664915966386554	-5.16680836133359	ko00480	KEGG Pathway	24.0		Glutathione metabolism	5.3161375661375665	0.0	0.0	0.0	ko00480	2876|2936|2950|4257	0.0	17.0	GPX1|GSR|GSTP1|MGST1	126	-0.6753744229590906		-2.1685157974376903		126	0.5075943249702668			3.773841200028861
187	3.0	31.0	3.0	392.0	28133.0	0.7653061224489796		-2.043944300069118	1.0	M1	1.0	12.664915966386554	-5.16680836133359	GO:0042744	GO Biological Processes	19.0		hydrogen peroxide catabolic process	6.945276497695852	0.0	0.0	0.0	GO:0042744	2876|3039|5052	0.0	17.0	GPX1|HBA1|PRDX1	127	-0.5881290767480147		-2.043944300069118	19_GO:0008152 metabolic process	127	0.4401556971275934			3.9370104823936956
188	4.0	16.0	4.0	392.0	28133.0	1.0204081632653061		-4.227910915332542	1.0	M1	1.0	28.707142857142863	-5.136957609175915	GO:0071816	GO Biological Processes	19.0		tail-anchored membrane protein insertion into ER membrane	17.94196428571429	0.0	0.0	0.0	GO:0071816	51234|55831|83460|93380	0.0	18.0	EMC4|EMC3|EMC6|MMGT1	128	-2.2231141441668956		-4.227910915332542	19_GO:0051179 localization	128	0.5075943249702668			8.057893897076994
189	4.0	19.0	4.0	392.0	28133.0	1.0204081632653061		-3.9139719791913783	1.0	M1	1.0	28.707142857142863	-5.136957609175915	GO:0045048	GO Biological Processes	19.0		protein insertion into ER membrane	15.109022556390979	0.0	0.0	0.0	GO:0045048	51234|55831|83460|93380	0.0	18.0	EMC4|EMC3|EMC6|MMGT1	129	-1.9832015629071198		-3.9139719791913783	19_GO:0051179 localization	129	0.5075943249702668			7.312985119436328
190	6.0	79.0	6.0	392.0	28133.0	1.530612244897959		-3.0800541836716886	1.0	M1	1.0	28.707142857142863	-5.136957609175915	GO:0007029	GO Biological Processes	19.0		endoplasmic reticulum organization	5.450723327305606	0.0	0.0	0.0	GO:0007029	51234|55161|55831|83460|93380|120892	0.0	18.0	EMC4|TMEM33|EMC3|EMC6|MMGT1|LRRK2	130	-1.3245845642958798		-3.0800541836716886	19_GO:0071840 cellular component organization or biogenesis	130	0.6200692247512228			4.709003669487782
191	16.0	478.0	16.0	392.0	28133.0	4.081632653061225		-2.915771161201783	1.0	M1	1.0	28.707142857142863	-5.136957609175915	GO:0010256	GO Biological Processes	19.0		endomembrane system organization	2.4022713687985657	0.0	0.0	0.0	GO:0010256	207|8560|9798|10142|11235|11252|23345|23353|51234|55161|55831|64753|83460|93380|120892|388552	0.0	18.0	AKT1|DEGS1|IST1|AKAP9|PDCD10|PACSIN2|SYNE1|SUN1|EMC4|TMEM33|EMC3|CCDC136|EMC6|MMGT1|LRRK2|BLOC1S3	131	-1.2071734740206723		-2.915771161201783	19_GO:0071840 cellular component organization or biogenesis	131	0.9993665598252253			3.6757119093874824
192	12.0	203.0	12.0	392.0	28133.0	3.061224489795918		-4.5144217680861285	1.0	M1	1.0	8.6991341991342	-5.011477024101827	GO:1902905	GO Biological Processes	19.0		positive regulation of supramolecular fiber organization	4.242434904996481	0.0	0.0	0.0	GO:1902905	25|387|402|2876|3397|6188|6281|10094|10142|10178|10300|55845	0.0	19.0	ABL1|RHOA|ARL2|GPX1|ID1|RPS3|S100A10|ARPC3|AKAP9|TENM1|KATNB1|BRK1	132	-2.460867927219705		-4.5144217680861285	19_GO:0048518 positive regulation of biological process	132	0.8700682497312916			5.511452879980714
193	12.0	223.0	12.0	392.0	28133.0	3.061224489795918		-4.119349458264441	1.0	M1	1.0	8.6991341991342	-5.011477024101827	GO:0051495	GO Biological Processes	19.0		positive regulation of cytoskeleton organization	3.861947469570788	0.0	0.0	0.0	GO:0051495	25|387|402|3397|6188|6281|10094|10142|10178|10300|55558|55845	0.0	19.0	ABL1|RHOA|ARL2|ID1|RPS3|S100A10|ARPC3|AKAP9|TENM1|KATNB1|PLXNA3|BRK1	133	-2.1303074543303815		-4.119349458264441	19_GO:0048518 positive regulation of biological process	133	0.8700682497312916			5.100543468323788
194	15.0	369.0	15.0	392.0	28133.0	3.826530612244898		-3.626956371191641	1.0	M1	1.0	8.6991341991342	-5.011477024101827	GO:1902903	GO Biological Processes	19.0		regulation of supramolecular fiber organization	2.9173925667828104	0.0	0.0	0.0	GO:1902903	25|387|402|1627|2876|3397|6188|6281|8500|10094|10142|10178|10300|10471|55845	0.0	19.0	ABL1|RHOA|ARL2|DBN1|GPX1|ID1|RPS3|S100A10|PPFIA1|ARPC3|AKAP9|TENM1|KATNB1|PFDN6|BRK1	134	-1.7480581038357443		-3.626956371191641	19_GO:0071840 cellular component organization or biogenesis	134	0.9689184016869838			4.40722767305745
195	4.0	33.0	4.0	392.0	28133.0	1.0204081632653061		-2.9572330100516844	1.0	M1	1.0	8.6991341991342	-5.011477024101827	GO:0031112	GO Biological Processes	19.0		positive regulation of microtubule polymerization or depolymerization	8.6991341991342	0.0	0.0	0.0	GO:0031112	402|6188|10142|10300	0.0	19.0	ARL2|RPS3|AKAP9|KATNB1	135	-1.2378142890072232		-2.9572330100516844	19_GO:0048518 positive regulation of biological process	135	0.5075943249702668			5.260511584470932
196	16.0	492.0	16.0	392.0	28133.0	4.081632653061225		-2.787909408148404	1.0	M1	1.0	8.6991341991342	-5.011477024101827	GO:0043254	GO Biological Processes	19.0		regulation of protein complex assembly	2.333914053426249	0.0	0.0	0.0	GO:0043254	25|402|1627|3931|4210|6188|6662|7417|10094|10142|10146|10178|10399|23521|55845|56926	0.0	19.0	ABL1|ARL2|DBN1|LCAT|MEFV|RPS3|SOX9|VDAC2|ARPC3|AKAP9|G3BP1|TENM1|RACK1|RPL13A|BRK1|NCLN	136	-1.1090317499779145		-2.787909408148404	19_GO:0071840 cellular component organization or biogenesis	136	0.9993665598252253			3.5482630252879086
197	20.0	713.0	20.0	392.0	28133.0	5.1020408163265305		-2.5800571502974092	1.0	M1	1.0	8.6991341991342	-5.011477024101827	GO:0097435	GO Biological Processes	19.0		supramolecular fiber organization	2.013123622520537	0.0	0.0	0.0	GO:0097435	25|226|387|402|1627|2280|2876|3397|5573|6188|6281|8500|10094|10142|10178|10300|10471|11235|55845|133522	0.0	19.0	ABL1|ALDOA|RHOA|ARL2|DBN1|FKBP1A|GPX1|ID1|PRKAR1A|RPS3|S100A10|PPFIA1|ARPC3|AKAP9|TENM1|KATNB1|PFDN6|PDCD10|BRK1|PPARGC1B	137	-0.9486931970129185		-2.5800571502974092	19_GO:0071840 cellular component organization or biogenesis	137	1.1113666677825735			3.2572850283519825
198	13.0	395.0	13.0	392.0	28133.0	3.316326530612245		-2.4085363629158665	1.0	M1	1.0	8.6991341991342	-5.011477024101827	GO:0032970	GO Biological Processes	19.0		regulation of actin filament-based process	2.361980108499096	0.0	0.0	0.0	GO:0032970	25|387|397|775|1627|3397|5142|6281|8500|10094|10142|10178|55845	0.0	19.0	ABL1|RHOA|ARHGDIB|CACNA1C|DBN1|ID1|PDE4B|S100A10|PPFIA1|ARPC3|AKAP9|TENM1|BRK1	138	-0.8370916271212344		-2.4085363629158665	19_GO:0050789 regulation of biological process	138	0.9044033880268492			3.2405148980306473
199	16.0	544.0	16.0	392.0	28133.0	4.081632653061225		-2.360793525360964	1.0	M1	1.0	8.6991341991342	-5.011477024101827	GO:0051493	GO Biological Processes	19.0		regulation of cytoskeleton organization	2.1108193277310927	0.0	0.0	0.0	GO:0051493	25|387|397|402|1627|3397|6188|6281|8500|10094|10142|10178|10300|23187|55558|55845	0.0	19.0	ABL1|RHOA|ARHGDIB|ARL2|DBN1|ID1|RPS3|S100A10|PPFIA1|ARPC3|AKAP9|TENM1|KATNB1|PHLDB1|PLXNA3|BRK1	139	-0.8024806802037309		-2.360793525360964	19_GO:0071840 cellular component organization or biogenesis	139	0.9993665598252253			3.1099770174434545
200	9.0	225.0	9.0	392.0	28133.0	2.295918367346939		-2.3461661966791136	1.0	M1	1.0	8.6991341991342	-5.011477024101827	GO:0032271	GO Biological Processes	19.0		regulation of protein polymerization	2.870714285714286	0.0	0.0	0.0	GO:0032271	25|402|1627|6188|7417|10094|10142|10178|55845	0.0	19.0	ABL1|ARL2|DBN1|RPS3|VDAC2|ARPC3|AKAP9|TENM1|BRK1	140	-0.7961468537258786		-2.3461661966791136	19_GO:0071840 cellular component organization or biogenesis	140	0.756469706802007			3.349011557925488
201	27.0	780.0	27.0	392.0	28133.0	6.887755102040816		-4.7926933746571905	1.0	M1	1.0	2.935290680689454	-4.943770658638207	GO:0045055	GO Biological Processes	19.0		regulated exocytosis	2.4842719780219777	0.0	0.0	0.0	GO:0045055	226|230|387|967|2517|2624|2821|2950|3685|3916|4257|5645|7130|7277|8560|8635|8649|9783|9798|10159|22999|23025|23071|23396|26258|51125|120892	0.0	20.0	ALDOA|ALDOC|RHOA|CD63|FUCA1|GATA2|GPI|GSTP1|ITGAV|LAMP1|MGST1|PRSS2|TNFAIP6|TUBA4A|DEGS1|RNASET2|LAMTOR3|RIMS3|IST1|ATP6AP2|RIMS1|UNC13A|ERP44|PIP5K1C|BLOC1S6|GOLGA7|LRRK2	141	-2.693859552329218		-4.7926933746571905	19_GO:0051179 localization	141	1.2790844340522147			4.997359452105299
202	20.0	489.0	20.0	392.0	28133.0	5.1020408163265305		-4.6829456080905185	1.0	M1	1.0	2.935290680689454	-4.943770658638207	GO:0002283	GO Biological Processes	19.0		neutrophil activation involved in immune response	2.935290680689454	0.0	0.0	0.0	GO:0002283	226|230|387|967|1773|2517|2821|2950|3685|3916|4257|5645|7130|8560|8635|8649|9798|10159|23071|51125	0.0	20.0	ALDOA|ALDOC|RHOA|CD63|DNASE1|FUCA1|GPI|GSTP1|ITGAV|LAMP1|MGST1|PRSS2|TNFAIP6|DEGS1|RNASET2|LAMTOR3|IST1|ATP6AP2|ERP44|GOLGA7	142	-2.598198247041151		-4.6829456080905185	19_GO:0002376 immune system process	142	1.1113666677825735			5.131950685015318
203	24.0	660.0	24.0	392.0	28133.0	6.122448979591836		-4.660285818805839	1.0	M1	1.0	2.935290680689454	-4.943770658638207	GO:0002274	GO Biological Processes	19.0		myeloid leukocyte activation	2.6097402597402595	0.0	0.0	0.0	GO:0002274	226|230|387|967|1773|2517|2624|2821|2950|3685|3916|4257|5645|7130|8560|8635|8649|9798|10159|22904|23071|51125|64784|120892	0.0	20.0	ALDOA|ALDOC|RHOA|CD63|DNASE1|FUCA1|GATA2|GPI|GSTP1|ITGAV|LAMP1|MGST1|PRSS2|TNFAIP6|DEGS1|RNASET2|LAMTOR3|IST1|ATP6AP2|SBNO2|ERP44|GOLGA7|CRTC3|LRRK2	143	-2.5857924895320132		-4.660285818805839	19_GO:0002376 immune system process	143	1.2108781141279994			4.974586790808648
204	20.0	500.0	20.0	392.0	28133.0	5.1020408163265305		-4.5463302294154975	1.0	M1	1.0	2.935290680689454	-4.943770658638207	GO:0002446	GO Biological Processes	19.0		neutrophil mediated immunity	2.870714285714286	0.0	0.0	0.0	GO:0002446	226|230|387|967|1773|2517|2821|2950|3685|3916|4257|5645|7130|8560|8635|8649|9798|10159|23071|51125	0.0	20.0	ALDOA|ALDOC|RHOA|CD63|DNASE1|FUCA1|GPI|GSTP1|ITGAV|LAMP1|MGST1|PRSS2|TNFAIP6|DEGS1|RNASET2|LAMTOR3|IST1|ATP6AP2|ERP44|GOLGA7	144	-2.4884550147664317		-4.5463302294154975	19_GO:0002376 immune system process	144	1.1113666677825735			5.01719208088393
205	20.0	501.0	20.0	392.0	28133.0	5.1020408163265305		-4.534129689532118	1.0	M1	1.0	2.935290680689454	-4.943770658638207	GO:0042119	GO Biological Processes	19.0		neutrophil activation	2.8649843170801255	0.0	0.0	0.0	GO:0042119	226|230|387|967|1773|2517|2821|2950|3685|3916|4257|5645|7130|8560|8635|8649|9798|10159|23071|51125	0.0	20.0	ALDOA|ALDOC|RHOA|CD63|DNASE1|FUCA1|GPI|GSTP1|ITGAV|LAMP1|MGST1|PRSS2|TNFAIP6|DEGS1|RNASET2|LAMTOR3|IST1|ATP6AP2|ERP44|GOLGA7	145	-2.4784205366395593		-4.534129689532118	19_GO:0002376 immune system process	145	1.1113666677825735			5.0069144234696985
206	20.0	506.0	20.0	392.0	28133.0	5.1020408163265305		-4.4736619515023985	1.0	M1	1.0	2.935290680689454	-4.943770658638207	GO:0036230	GO Biological Processes	19.0		granulocyte activation	2.8366741953698478	0.0	0.0	0.0	GO:0036230	226|230|387|967|1773|2517|2821|2950|3685|3916|4257|5645|7130|8560|8635|8649|9798|10159|23071|51125	0.0	20.0	ALDOA|ALDOC|RHOA|CD63|DNASE1|FUCA1|GPI|GSTP1|ITGAV|LAMP1|MGST1|PRSS2|TNFAIP6|DEGS1|RNASET2|LAMTOR3|IST1|ATP6AP2|ERP44|GOLGA7	146	-2.4243869086152503		-4.4736619515023985	19_GO:0002376 immune system process	146	1.1113666677825735			4.955903035664534
207	21.0	552.0	21.0	392.0	28133.0	5.357142857142857		-4.427352154889754	1.0	M1	1.0	2.935290680689454	-4.943770658638207	GO:0002444	GO Biological Processes	19.0		myeloid leukocyte mediated immunity	2.730298913043478	0.0	0.0	0.0	GO:0002444	226|230|387|967|1773|2517|2624|2821|2950|3685|3916|4257|5645|7130|8560|8635|8649|9798|10159|23071|51125	0.0	20.0	ALDOA|ALDOC|RHOA|CD63|DNASE1|FUCA1|GATA2|GPI|GSTP1|ITGAV|LAMP1|MGST1|PRSS2|TNFAIP6|DEGS1|RNASET2|LAMTOR3|IST1|ATP6AP2|ERP44|GOLGA7	147	-2.386510279539469		-4.427352154889754	19_GO:0002376 immune system process	147	1.1372802614876918			4.8805408414568765
208	19.0	480.0	19.0	392.0	28133.0	4.846938775510204		-4.287035666646154	1.0	M1	1.0	2.935290680689454	-4.943770658638207	R-HSA-6798695	Reactome Gene Sets	6.0		Neutrophil degranulation	2.840811011904762	0.0	0.0	0.0	R-HSA-6798695	226|230|387|967|2517|2821|2950|3685|3916|4257|5645|7130|8560|8635|8649|9798|10159|23071|51125	0.0	20.0	ALDOA|ALDOC|RHOA|CD63|FUCA1|GPI|GSTP1|ITGAV|LAMP1|MGST1|PRSS2|TNFAIP6|DEGS1|RNASET2|LAMTOR3|IST1|ATP6AP2|ERP44|GOLGA7	148	-2.274483430783745		-4.287035666646154		148	1.0846812073485896			4.835495430614655
209	19.0	486.0	19.0	392.0	28133.0	4.846938775510204		-4.215465126304476	1.0	M1	1.0	2.935290680689454	-4.943770658638207	GO:0043312	GO Biological Processes	19.0		neutrophil degranulation	2.805739271017049	0.0	0.0	0.0	GO:0043312	226|230|387|967|2517|2821|2950|3685|3916|4257|5645|7130|8560|8635|8649|9798|10159|23071|51125	0.0	20.0	ALDOA|ALDOC|RHOA|CD63|FUCA1|GPI|GSTP1|ITGAV|LAMP1|MGST1|PRSS2|TNFAIP6|DEGS1|RNASET2|LAMTOR3|IST1|ATP6AP2|ERP44|GOLGA7	149	-2.2144947629918827		-4.215465126304476	19_GO:0002376 immune system process	149	1.0846812073485896			4.773439836911239
210	27.0	193.0	27.0	392.0	28133.0	6.887755102040816		-18.56806122632926	1.0	M1	1.0	17.941964285714285	-18.56806122632926	ko05016	KEGG Pathway	24.0	Huntington's disease	Huntington's disease	10.040062916358252	0.0	1.0	1.0	ko05016	513|514|517|518|1337|1345|1347|1351|1537|1742|2876|2904|4508|4694|4698|4701|4705|4706|4708|4722|4724|4729|6667|7417|9377|10891|84701	0.0	1.0	ATP5F1D|ATP5F1E|ATP5MC2|ATP5MC3|COX6A1|COX6C|COX7A2|COX8A|CYC1|DLG4|GPX1|GRIN2B|ATP6|NDUFA1|NDUFA5|NDUFA7|NDUFA10|NDUFAB1|NDUFB2|NDUFS3|NDUFS4|NDUFV2|SP1|VDAC2|COX5A|PPARGC1A|COX4I2	150	-14.252714983109602		-18.56806122632926		150	1.2790844340522147			14.980254386501178
211	19.0	296.0	19.0	392.0	28133.0	4.846938775510204		-7.36480775086175	1.0	M1	1.0	15.378826530612244	-7.36480775086175	R-HSA-1852241	Reactome Gene Sets	6.0	Organelle biogenesis and maintenance	Organelle biogenesis and maintenance	4.60672055984556	0.0	1.0	1.0	R-HSA-1852241	513|514|517|518|4508|5116|7277|7846|10142|10575|10632|10891|11116|22948|64784|80173|83658|84790|133522	0.0	6.0	ATP5F1D|ATP5F1E|ATP5MC2|ATP5MC3|ATP6|PCNT|TUBA4A|TUBA1A|AKAP9|CCT4|ATP5MG|PPARGC1A|CEP43|CCT5|CRTC3|IFT74|DYNLRB1|TUBA1C|PPARGC1B	151	-5.070360529775622		-7.36480775086175		151	1.0846812073485896			7.415311817259073
212	6.0	34.0	6.0	392.0	28133.0	1.530612244897959		-5.16680836133359	1.0	M1	1.0	12.664915966386554	-5.16680836133359	WP408	WikiPathways	27.0	Oxidative Stress	Oxidative Stress	12.664915966386554	0.0	1.0	1.0	WP408	2353|2876|2936|4257|6667|25828	0.0	17.0	FOS|GPX1|GSR|MGST1|SP1|TXN2	152	-3.028011239060598		-5.16680836133359		152	0.6200692247512228			8.090175122170681
213	5.0	16.0	5.0	392.0	28133.0	1.2755102040816326		-5.705339985653938	1.0	M1	1.0	22.427455357142858	-5.705339985653938	CORUM:2920	CORUM	33.0	Respiratory chain complex I (lambda subunit) mitochondrial	Respiratory chain complex I (lambda subunit) mitochondrial	22.427455357142858	0.0	1.0	1.0	CORUM:2920	4698|4701|4722|4724|4729	0.0	13.0	NDUFA5|NDUFA7|NDUFS3|NDUFS4|NDUFV2	153	-3.5078027775758662		-5.705339985653938		153	0.566775911625211			10.191271734517867
214	10.0	87.0	10.0	392.0	28133.0	2.5510204081632653		-6.421014797141004	1.0	M1	1.0	30.757653061224488	-6.421014797141004	R-HSA-5628897	Reactome Gene Sets	6.0	TP53 Regulates Metabolic Genes	TP53 Regulates Metabolic Genes	8.249178981937602	0.0	1.0	1.0	R-HSA-5628897	207|1337|1345|1351|2821|2936|5052|8649|9377|116228	0.0	9.0	AKT1|COX6A1|COX6C|COX8A|GPI|GSR|PRDX1|LAMTOR3|COX5A|COX20	154	-4.169319556475825		-6.421014797141004		154	0.7963474265091894			8.04998860783458
215	29.0	291.0	29.0	392.0	28133.0	7.3979591836734695		-15.830455470512995	1.0	M1	1.0	20.83582949308756	-15.830455470512995	R-HSA-72766	Reactome Gene Sets	6.0	Translation	Translation	7.15212322042219	0.0	1.0	1.0	R-HSA-72766	3646|6125|6130|6132|6136|6146|6155|6169|6188|6191|6206|6207|6217|6224|6227|6231|6745|6747|8664|23480|23521|28998|51023|51116|51318|51504|92259|116541|128308	0.0	2.0	EIF3E|RPL5|RPL7A|RPL8|RPL12|RPL22|RPL27|RPL38|RPS3|RPS4X|RPS12|RPS13|RPS16|RPS20|RPS21|RPS26|SSR1|SSR3|EIF3D|SEC61G|RPL13A|MRPL13|MRPS18C|MRPS2|MRPL35|TRMT112|MRPS36|MRPL54|MRPL55	155	-12.772580255863929		-15.830455470512995		155	1.3219749047102962			12.540174705025764
216	20.0	435.0	20.0	392.0	28133.0	5.1020408163265305		-5.4241088540044595	1.0	M1	1.0	7.360805860805862	-5.4241088540044595	WP3888	WikiPathways	27.0	VEGFA-VEGFR2 Signaling Pathway	VEGFA-VEGFR2 Signaling Pathway	3.299671592775041	0.0	1.0	1.0	WP3888	25|207|226|387|1200|2624|2876|3685|3748|4323|4772|5743|6155|6747|6921|8664|10399|23521|84790|441478	0.0	15.0	ABL1|AKT1|ALDOA|RHOA|TPP1|GATA2|GPX1|ITGAV|KCNC3|MMP14|NFATC1|PTGS2|RPL27|SSR3|ELOC|EIF3D|RACK1|RPL13A|TUBA1C|NRARP	156	-3.263860730645835		-5.4241088540044595		156	1.1113666677825735			5.746038416519692
217	24.0	473.0	24.0	392.0	28133.0	6.122448979591836		-7.175874264605522	1.0	M1	1.0	4.457630878438332	-7.175874264605522	GO:0016049	GO Biological Processes	19.0	cell growth	cell growth	3.641498036846874	0.0	1.0	1.0	GO:0016049	25|207|323|551|694|1027|1627|4323|4722|5645|6585|6662|9175|9538|9798|10399|10501|11116|22999|23025|53335|55558|57446|123904	0.0	7.0	ABL1|AKT1|APBB2|AVP|BTG1|CDKN1B|DBN1|MMP14|NDUFS3|PRSS2|SLIT1|SOX9|MAP3K13|EI24|IST1|RACK1|SEMA6B|CEP43|RIMS1|UNC13A|BCL11A|PLXNA3|NDRG3|NRN1L	157	-4.8888510615986		-7.175874264605522	19_GO:0040007 growth	157	1.2108781141279994			6.88711058535015
218	23.0	571.0	23.0	392.0	28133.0	5.86734693877551		-5.191731136073756	1.0	M1	1.0	9.786525974025974	-5.191731136073756	GO:0043009	GO Biological Processes	19.0	chordate embryonic development	chordate embryonic development	2.8908243682762076	0.0	1.0	1.0	GO:0043009	25|207|1051|1603|1627|2624|3633|4323|5087|6498|6662|7289|7320|8642|10159|10365|54880|55845|144165|201895|285855|338596|441478	0.0	16.0	ABL1|AKT1|CEBPB|DAD1|DBN1|GATA2|INPP5B|MMP14|PBX1|SKIL|SOX9|TULP3|UBE2B|DCHS1|ATP6AP2|KLF2|BCOR|BRK1|PRICKLE1|SMIM14|RPL7L1|ST8SIA6|NRARP	158	-3.0476697738084066		-5.191731136073756	19_GO:0032502 developmental process	158	1.1869925701863226			5.4262045642003685
219	16.0	268.0	16.0	392.0	28133.0	4.081632653061225		-5.879844724302334	1.0	M1	1.0	43.06071428571428	-5.879844724302334	GO:0021700	GO Biological Processes	19.0	developmental maturation	developmental maturation	4.2846481876332625	0.0	1.0	1.0	GO:0021700	387|473|967|1742|2624|8642|9175|10159|10365|23025|26258|53335|79670|120892|158866|388552	0.0	11.0	RHOA|RERE|CD63|DLG4|GATA2|DCHS1|MAP3K13|ATP6AP2|KLF2|UNC13A|BLOC1S6|BCL11A|TUT7|LRRK2|ZDHHC15|BLOC1S3	159	-3.663954314243382		-5.879844724302334	19_GO:0032502 developmental process	159	0.9993665598252253			6.422572493276182
220	32.0	757.0	32.0	392.0	28133.0	8.16326530612245		-7.4898904806439095	1.0	M1	1.0	23.922619047619047	-7.4898904806439095	GO:0098662	GO Biological Processes	19.0	inorganic cation transmembrane transport	inorganic cation transmembrane transport	3.033779958482733	0.0	1.0	1.0	GO:0098662	25|483|513|514|517|518|525|775|967|1337|1345|1347|1351|2280|2904|3685|3748|3782|4508|5142|5348|6324|7402|9377|10142|10632|23479|57181|57282|57419|84701|93380	0.0	5.0	ABL1|ATP1B3|ATP5F1D|ATP5F1E|ATP5MC2|ATP5MC3|ATP6V1B1|CACNA1C|CD63|COX6A1|COX6C|COX7A2|COX8A|FKBP1A|GRIN2B|ITGAV|KCNC3|KCNN3|ATP6|PDE4B|FXYD1|SCN1B|UTRN|COX5A|AKAP9|ATP5MG|ISCU|SLC39A10|SLC4A10|SLC24A3|COX4I2|MMGT1	160	-5.191683110684474		-7.4898904806439095	19_GO:0051179 localization	160	1.382920259548854			6.74293834559848
221	22.0	550.0	22.0	392.0	28133.0	5.612244897959184		-4.943770658638207	1.0	M1	1.0	2.935290680689454	-4.943770658638207	GO:0002275	GO Biological Processes	19.0	myeloid cell activation involved in immune response	myeloid cell activation involved in immune response	2.8707142857142856	0.0	1.0	1.0	GO:0002275	226|230|387|967|1773|2517|2624|2821|2950|3685|3916|4257|5645|7130|8560|8635|8649|9798|10159|22904|23071|51125	0.0	20.0	ALDOA|ALDOC|RHOA|CD63|DNASE1|FUCA1|GATA2|GPI|GSTP1|ITGAV|LAMP1|MGST1|PRSS2|TNFAIP6|DEGS1|RNASET2|LAMTOR3|IST1|ATP6AP2|SBNO2|ERP44|GOLGA7	161	-2.840137953428466		-4.943770658638207	19_GO:0002376 immune system process	161	1.1624736084356109			5.266842598318552
222	31.0	782.0	31.0	392.0	28133.0	7.908163265306122		-6.656937155231599	1.0	M1	1.0	3.87934362934363	-6.656937155231599	GO:0051129	GO Biological Processes	19.0	negative regulation of cellular component organization	negative regulation of cellular component organization	2.8450173547679936	0.0	1.0	1.0	GO:0051129	207|347|387|551|664|1742|2876|2904|3397|3685|4210|4323|5573|6585|6662|7320|7417|8500|10300|10399|10471|10501|10891|11252|23521|29116|29956|53335|54880|55558|120892	0.0	8.0	AKT1|APOD|RHOA|AVP|BNIP3|DLG4|GPX1|GRIN2B|ID1|ITGAV|MEFV|MMP14|PRKAR1A|SLIT1|SOX9|UBE2B|VDAC2|PPFIA1|KATNB1|RACK1|PFDN6|SEMA6B|PPARGC1A|PACSIN2|RPL13A|MYLIP|CERS2|BCL11A|BCOR|PLXNA3|LRRK2	162	-4.38793705635795		-6.656937155231599	19_GO:0048519 negative regulation of biological process	162	1.3630297886864469			6.220130681756175
223	24.0	628.0	24.0	392.0	28133.0	6.122448979591836		-5.011477024101827	1.0	M1	1.0	8.6991341991342	-5.011477024101827	GO:0010638	GO Biological Processes	19.0	positive regulation of organelle organization	positive regulation of organelle organization	2.7427206551410372	0.0	1.0	1.0	GO:0010638	25|387|402|664|996|3397|6188|6281|7320|7334|9776|10094|10142|10146|10178|10300|10575|10891|22880|22948|51043|55558|55845|120892	0.0	19.0	ABL1|RHOA|ARL2|BNIP3|CDC27|ID1|RPS3|S100A10|UBE2B|UBE2N|ATG13|ARPC3|AKAP9|G3BP1|TENM1|KATNB1|CCT4|PPARGC1A|MORC2|CCT5|ZBTB7B|PLXNA3|BRK1|LRRK2	163	-2.9029918160976744		-5.011477024101827	19_GO:0048518 positive regulation of biological process	163	1.2108781141279994			5.250299250419218
224	4.0	10.0	4.0	392.0	28133.0	1.0204081632653061		-5.136957609175915	1.0	M1	1.0	28.707142857142863	-5.136957609175915	GO:0045050	GO Biological Processes	19.0	protein insertion into ER membrane by stop-transfer membrane-anchor sequence	protein insertion into ER membrane by stop-transfer membrane-anchor sequence	28.707142857142863	0.0	1.0	1.0	GO:0045050	51234|55831|83460|93380	0.0	18.0	EMC4|EMC3|EMC6|MMGT1	164	-3.0085013202411415		-5.136957609175915	19_GO:0051179 localization	164	0.5075943249702668			10.417012905401558
225	30.0	645.0	30.0	392.0	28133.0	7.653061224489796		-7.969795820310332	1.0	M1	1.0	5.450723327305606	-7.969795820310332	GO:0045664	GO Biological Processes	19.0	regulation of neuron differentiation	regulation of neuron differentiation	3.3380398671096345	0.0	1.0	1.0	GO:0045664	25|207|387|1627|1742|1944|2290|2624|3397|4076|5087|6324|6453|6498|6662|6935|9175|9798|10300|10501|11178|22999|23025|23303|29116|29956|53335|55558|120892|158866	0.0	4.0	ABL1|AKT1|RHOA|DBN1|DLG4|EFNA3|FOXG1|GATA2|ID1|CAPRIN1|PBX1|SCN1B|ITSN1|SKIL|SOX9|ZEB1|MAP3K13|IST1|KATNB1|SEMA6B|LZTS1|RIMS1|UNC13A|KIF13B|MYLIP|CERS2|BCL11A|PLXNA3|LRRK2|ZDHHC15	165	-5.656213588783943		-7.969795820310332	19_GO:0032502 developmental process	165	1.3427210952580568			7.140727830472493
226	17.0	297.0	17.0	392.0	28133.0	4.336734693877551		-5.957453799995849	1.0	M1	1.0	4.884723261032161	-5.957453799995849	GO:0031647	GO Biological Processes	19.0	regulation of protein stability	regulation of protein stability	4.107924482924482	0.0	1.0	1.0	GO:0031647	483|819|1409|1603|3916|6125|7320|8818|8863|10575|10891|11235|22948|29116|51125|56926|120892	0.0	10.0	ATP1B3|CAMLG|CRYAA|DAD1|LAMP1|RPL5|UBE2B|DPM2|PER3|CCT4|PPARGC1A|PDCD10|CCT5|MYLIP|GOLGA7|NCLN|LRRK2	166	-3.735269156839209		-5.957453799995849	19_GO:0065007 biological regulation	166	1.0287527141614627			6.400701146285702
227	25.0	451.0	25.0	392.0	28133.0	6.377551020408164		-8.207266599743216	1.0	M1	1.0	5.581944444444445	-8.207266599743216	GO:0006979	GO Biological Processes	19.0	response to oxidative stress	response to oxidative stress	3.978262591067469	0.0	1.0	1.0	GO:0006979	25|207|347|664|2353|2876|2936|2950|3039|4153|4257|4323|5052|5743|6188|6667|10365|10399|10891|11235|25828|51142|120892|133522|140823	0.0	3.0	ABL1|AKT1|APOD|BNIP3|FOS|GPX1|GSR|GSTP1|HBA1|MBL2|MGST1|MMP14|PRDX1|PTGS2|RPS3|SP1|KLF2|RACK1|PPARGC1A|PDCD10|TXN2|CHCHD2|LRRK2|PPARGC1B|ROMO1	167	-5.869550688500107		-8.207266599743216	19_GO:0050896 response to stimulus	167	1.234167017505837			7.579399643937702
228	17.0	307.0	17.0	392.0	28133.0	4.336734693877551		-5.761058396208129	1.0	M1	1.0	7.689413265306122	-5.761058396208129	GO:0042254	GO Biological Processes	19.0	ribosome biogenesis	ribosome biogenesis	3.974115867845509	0.0	1.0	1.0	GO:0042254	6125|6130|6155|6169|6217|6227|29889|51001|51116|51187|51202|51504|54433|55164|55651|90121|285855	0.0	12.0	RPL5|RPL7A|RPL27|RPL38|RPS16|RPS21|GNL2|MTERF3|MRPS2|RSL24D1|DDX47|TRMT112|GAR1|SHQ1|NHP2|TSR2|RPL7L1	168	-3.560515677990331		-5.761058396208129	19_GO:0071840 cellular component organization or biogenesis	168	1.0287527141614627			6.228507089811354
229	23.0	534.0	23.0	392.0	28133.0	5.86734693877551		-5.670772509489572	1.0	M1	1.0	7.4564007421150285	-5.670772509489572	GO:0007423	GO Biological Processes	19.0	sensory organ development	sensory organ development	3.0911249331193154	0.0	1.0	1.0	GO:0007423	93|525|775|1412|1414|1415|1418|1420|2290|2624|3982|5087|6169|6498|6662|7289|8642|23287|55084|84440|121227|155051|388552	0.0	14.0	ACVR2B|ATP6V1B1|CACNA1C|CRYBA2|CRYBB1|CRYBB2|CRYGA|CRYGC|FOXG1|GATA2|LIM2|PBX1|RPL38|SKIL|SOX9|TULP3|DCHS1|AGTPBP1|SOBP|RAB11FIP4|LRIG3|CRYGN|BLOC1S3	169	-3.479184633924701		-5.670772509489572	19_GO:0032502 developmental process	169	1.1869925701863226			5.799442104636817
1174	25.0	451.0	25.0	392.0	28133.0		6.377551020408164	-8.207266599743216	1.0	M1	1.0	5.581944444444445	-8.207266599743216		GO Biological Processes	19.0	response to oxidative stress	response to oxidative stress	3.978262591067469	0.0	1.0	1.0	GO:0006979	25|207|347|664|2353|2876|2936|2950|3039|4153|4257|4323|5052|5743|6188|6667|10365|10399|10891|11235|25828|51142|120892|133522|140823	0.0	3.0	ABL1|AKT1|APOD|BNIP3|FOS|GPX1|GSR|GSTP1|HBA1|MBL2|MGST1|MMP14|PRDX1|PTGS2|RPS3|SP1|KLF2|RACK1|PPARGC1A|PDCD10|TXN2|CHCHD2|LRRK2|PPARGC1B|ROMO1	3		-5.869550688500107	-8.207266599743216	19_GO:0050896 response to stimulus	3		1.234167017505837	GO:0006979		7.579399643937702
1176	30.0	645.0	30.0	392.0	28133.0		7.653061224489796	-7.969795820310332	1.0	M1	1.0	5.450723327305606	-7.969795820310332		GO Biological Processes	19.0	regulation of neuron differentiation	regulation of neuron differentiation	3.3380398671096345	0.0	1.0	1.0	GO:0045664	25|207|387|1627|1742|1944|2290|2624|3397|4076|5087|6324|6453|6498|6662|6935|9175|9798|10300|10501|11178|22999|23025|23303|29116|29956|53335|55558|120892|158866	0.0	4.0	ABL1|AKT1|RHOA|DBN1|DLG4|EFNA3|FOXG1|GATA2|ID1|CAPRIN1|PBX1|SCN1B|ITSN1|SKIL|SOX9|ZEB1|MAP3K13|IST1|KATNB1|SEMA6B|LZTS1|RIMS1|UNC13A|KIF13B|MYLIP|CERS2|BCL11A|PLXNA3|LRRK2|ZDHHC15	5		-5.656213588783943	-7.969795820310332	19_GO:0032502 developmental process	5		1.3427210952580568	GO:0045664		7.140727830472493
1178	24.0	628.0	24.0	392.0	28133.0		6.122448979591836	-5.011477024101827	1.0	M1	1.0	8.6991341991342	-5.011477024101827		GO Biological Processes	19.0	positive regulation of organelle organization	positive regulation of organelle organization	2.7427206551410372	0.0	1.0	1.0	GO:0010638	25|387|402|664|996|3397|6188|6281|7320|7334|9776|10094|10142|10146|10178|10300|10575|10891|22880|22948|51043|55558|55845|120892	0.0	19.0	ABL1|RHOA|ARL2|BNIP3|CDC27|ID1|RPS3|S100A10|UBE2B|UBE2N|ATG13|ARPC3|AKAP9|G3BP1|TENM1|KATNB1|CCT4|PPARGC1A|MORC2|CCT5|ZBTB7B|PLXNA3|BRK1|LRRK2	7		-2.9029918160976744	-5.011477024101827	19_GO:0048518 positive regulation of biological process	7		1.2108781141279994	GO:0010638		5.250299250419218
1179	31.0	782.0	31.0	392.0	28133.0		7.908163265306122	-6.656937155231599	1.0	M1	1.0	3.87934362934363	-6.656937155231599		GO Biological Processes	19.0	negative regulation of cellular component organization	negative regulation of cellular component organization	2.8450173547679936	0.0	1.0	1.0	GO:0051129	207|347|387|551|664|1742|2876|2904|3397|3685|4210|4323|5573|6585|6662|7320|7417|8500|10300|10399|10471|10501|10891|11252|23521|29116|29956|53335|54880|55558|120892	0.0	8.0	AKT1|APOD|RHOA|AVP|BNIP3|DLG4|GPX1|GRIN2B|ID1|ITGAV|MEFV|MMP14|PRKAR1A|SLIT1|SOX9|UBE2B|VDAC2|PPFIA1|KATNB1|RACK1|PFDN6|SEMA6B|PPARGC1A|PACSIN2|RPL13A|MYLIP|CERS2|BCL11A|BCOR|PLXNA3|LRRK2	8		-4.38793705635795	-6.656937155231599	19_GO:0048519 negative regulation of biological process	8		1.3630297886864469	GO:0051129		6.220130681756175
1181	32.0	757.0	32.0	392.0	28133.0		8.16326530612245	-7.4898904806439095	1.0	M1	1.0	23.922619047619047	-7.4898904806439095		GO Biological Processes	19.0	inorganic cation transmembrane transport	inorganic cation transmembrane transport	3.033779958482733	0.0	1.0	1.0	GO:0098662	25|483|513|514|517|518|525|775|967|1337|1345|1347|1351|2280|2904|3685|3748|3782|4508|5142|5348|6324|7402|9377|10142|10632|23479|57181|57282|57419|84701|93380	0.0	5.0	ABL1|ATP1B3|ATP5F1D|ATP5F1E|ATP5MC2|ATP5MC3|ATP6V1B1|CACNA1C|CD63|COX6A1|COX6C|COX7A2|COX8A|FKBP1A|GRIN2B|ITGAV|KCNC3|KCNN3|ATP6|PDE4B|FXYD1|SCN1B|UTRN|COX5A|AKAP9|ATP5MG|ISCU|SLC39A10|SLC4A10|SLC24A3|COX4I2|MMGT1	10		-5.191683110684474	-7.4898904806439095	19_GO:0051179 localization	10		1.382920259548854	GO:0098662		6.74293834559848
1182	16.0	268.0	16.0	392.0	28133.0		4.081632653061225	-5.879844724302334	1.0	M1	1.0	43.06071428571428	-5.879844724302334		GO Biological Processes	19.0	developmental maturation	developmental maturation	4.2846481876332625	0.0	1.0	1.0	GO:0021700	387|473|967|1742|2624|8642|9175|10159|10365|23025|26258|53335|79670|120892|158866|388552	0.0	11.0	RHOA|RERE|CD63|DLG4|GATA2|DCHS1|MAP3K13|ATP6AP2|KLF2|UNC13A|BLOC1S6|BCL11A|TUT7|LRRK2|ZDHHC15|BLOC1S3	11		-3.663954314243382	-5.879844724302334	19_GO:0032502 developmental process	11		0.9993665598252253	GO:0021700		6.422572493276182
1183	23.0	571.0	23.0	392.0	28133.0		5.86734693877551	-5.191731136073756	1.0	M1	1.0	9.786525974025974	-5.191731136073756		GO Biological Processes	19.0	chordate embryonic development	chordate embryonic development	2.8908243682762076	0.0	1.0	1.0	GO:0043009	25|207|1051|1603|1627|2624|3633|4323|5087|6498|6662|7289|7320|8642|10159|10365|54880|55845|144165|201895|285855|338596|441478	0.0	16.0	ABL1|AKT1|CEBPB|DAD1|DBN1|GATA2|INPP5B|MMP14|PBX1|SKIL|SOX9|TULP3|UBE2B|DCHS1|ATP6AP2|KLF2|BCOR|BRK1|PRICKLE1|SMIM14|RPL7L1|ST8SIA6|NRARP	12		-3.0476697738084066	-5.191731136073756	19_GO:0032502 developmental process	12		1.1869925701863226	GO:0043009		5.4262045642003685
1184	24.0	473.0	24.0	392.0	28133.0		6.122448979591836	-7.175874264605522	1.0	M1	1.0	4.457630878438332	-7.175874264605522		GO Biological Processes	19.0	cell growth	cell growth	3.641498036846874	0.0	1.0	1.0	GO:0016049	25|207|323|551|694|1027|1627|4323|4722|5645|6585|6662|9175|9538|9798|10399|10501|11116|22999|23025|53335|55558|57446|123904	0.0	7.0	ABL1|AKT1|APBB2|AVP|BTG1|CDKN1B|DBN1|MMP14|NDUFS3|PRSS2|SLIT1|SOX9|MAP3K13|EI24|IST1|RACK1|SEMA6B|CEP43|RIMS1|UNC13A|BCL11A|PLXNA3|NDRG3|NRN1L	13		-4.8888510615986	-7.175874264605522	19_GO:0040007 growth	13		1.2108781141279994	GO:0016049		6.88711058535015
1185	20.0	435.0	20.0	392.0	28133.0		5.1020408163265305	-5.4241088540044595	1.0	M1	1.0	7.360805860805862	-5.4241088540044595		WikiPathways	27.0	VEGFA-VEGFR2 Signaling Pathway	VEGFA-VEGFR2 Signaling Pathway	3.299671592775041	0.0	1.0	1.0	WP3888	25|207|226|387|1200|2624|2876|3685|3748|4323|4772|5743|6155|6747|6921|8664|10399|23521|84790|441478	0.0	15.0	ABL1|AKT1|ALDOA|RHOA|TPP1|GATA2|GPX1|ITGAV|KCNC3|MMP14|NFATC1|PTGS2|RPL27|SSR3|ELOC|EIF3D|RACK1|RPL13A|TUBA1C|NRARP	14		-3.263860730645835	-5.4241088540044595		14		1.1113666677825735	WP3888		5.746038416519692
1187	10.0	87.0	10.0	392.0	28133.0		2.5510204081632653	-6.421014797141004	1.0	M1	1.0	30.757653061224488	-6.421014797141004		Reactome Gene Sets	6.0	TP53 Regulates Metabolic Genes	TP53 Regulates Metabolic Genes	8.249178981937602	0.0	1.0	1.0	R-HSA-5628897	207|1337|1345|1351|2821|2936|5052|8649|9377|116228	0.0	9.0	AKT1|COX6A1|COX6C|COX8A|GPI|GSR|PRDX1|LAMTOR3|COX5A|COX20	16		-4.169319556475825	-6.421014797141004		16		0.7963474265091894	R-HSA-5628897		8.04998860783458
1188	5.0	16.0	5.0	392.0	28133.0		1.2755102040816326	-5.705339985653938	1.0	M1	1.0	22.427455357142858	-5.705339985653938		CORUM	33.0	Respiratory chain complex I (lambda subunit) mitochondrial	Respiratory chain complex I (lambda subunit) mitochondrial	22.427455357142858	0.0	1.0	1.0	CORUM:2920	4698|4701|4722|4724|4729	0.0	13.0	NDUFA5|NDUFA7|NDUFS3|NDUFS4|NDUFV2	17		-3.5078027775758662	-5.705339985653938		17		0.566775911625211	CORUM:2920		10.191271734517867
1189	6.0	34.0	6.0	392.0	28133.0		1.530612244897959	-5.16680836133359	1.0	M1	1.0	12.664915966386554	-5.16680836133359		WikiPathways	27.0	Oxidative Stress	Oxidative Stress	12.664915966386554	0.0	1.0	1.0	WP408	2353|2876|2936|4257|6667|25828	0.0	17.0	FOS|GPX1|GSR|MGST1|SP1|TXN2	18		-3.028011239060598	-5.16680836133359		18		0.6200692247512228	WP408		8.090175122170681
1190	19.0	296.0	19.0	392.0	28133.0		4.846938775510204	-7.36480775086175	1.0	M1	1.0	15.378826530612244	-7.36480775086175		Reactome Gene Sets	6.0	Organelle biogenesis and maintenance	Organelle biogenesis and maintenance	4.60672055984556	0.0	1.0	1.0	R-HSA-1852241	513|514|517|518|4508|5116|7277|7846|10142|10575|10632|10891|11116|22948|64784|80173|83658|84790|133522	0.0	6.0	ATP5F1D|ATP5F1E|ATP5MC2|ATP5MC3|ATP6|PCNT|TUBA4A|TUBA1A|AKAP9|CCT4|ATP5MG|PPARGC1A|CEP43|CCT5|CRTC3|IFT74|DYNLRB1|TUBA1C|PPARGC1B	19		-5.070360529775622	-7.36480775086175		19		1.0846812073485896	R-HSA-1852241		7.415311817259073
1191	27.0	193.0	27.0	392.0	28133.0		6.887755102040816	-18.56806122632926	1.0	M1	1.0	17.941964285714285	-18.56806122632926		KEGG Pathway	24.0	Huntington's disease	Huntington's disease	10.040062916358252	0.0	1.0	1.0	ko05016	513|514|517|518|1337|1345|1347|1351|1537|1742|2876|2904|4508|4694|4698|4701|4705|4706|4708|4722|4724|4729|6667|7417|9377|10891|84701	0.0	1.0	ATP5F1D|ATP5F1E|ATP5MC2|ATP5MC3|COX6A1|COX6C|COX7A2|COX8A|CYC1|DLG4|GPX1|GRIN2B|ATP6|NDUFA1|NDUFA5|NDUFA7|NDUFA10|NDUFAB1|NDUFB2|NDUFS3|NDUFS4|NDUFV2|SP1|VDAC2|COX5A|PPARGC1A|COX4I2	20		-14.252714983109602	-18.56806122632926		20		1.2790844340522147	ko05016		14.980254386501178
1201	9.0	225.0	9.0	392.0	28133.0		2.295918367346939	-2.3461661966791136	1.0	M1	1.0	8.6991341991342	-5.011477024101827		GO Biological Processes	19.0		regulation of protein polymerization	2.870714285714286	0.0	0.0	0.0	GO:0032271	25|402|1627|6188|7417|10094|10142|10178|55845	0.0	19.0	ABL1|ARL2|DBN1|RPS3|VDAC2|ARPC3|AKAP9|TENM1|BRK1	30		-0.7961468537258786	-2.3461661966791136	19_GO:0071840 cellular component organization or biogenesis	30		0.756469706802007	GO:0032271		3.349011557925488
1202	16.0	544.0	16.0	392.0	28133.0		4.081632653061225	-2.360793525360964	1.0	M1	1.0	8.6991341991342	-5.011477024101827		GO Biological Processes	19.0		regulation of cytoskeleton organization	2.1108193277310927	0.0	0.0	0.0	GO:0051493	25|387|397|402|1627|3397|6188|6281|8500|10094|10142|10178|10300|23187|55558|55845	0.0	19.0	ABL1|RHOA|ARHGDIB|ARL2|DBN1|ID1|RPS3|S100A10|PPFIA1|ARPC3|AKAP9|TENM1|KATNB1|PHLDB1|PLXNA3|BRK1	31		-0.8024806802037309	-2.360793525360964	19_GO:0071840 cellular component organization or biogenesis	31		0.9993665598252253	GO:0051493		3.1099770174434545
1203	13.0	395.0	13.0	392.0	28133.0		3.316326530612245	-2.4085363629158665	1.0	M1	1.0	8.6991341991342	-5.011477024101827		GO Biological Processes	19.0		regulation of actin filament-based process	2.361980108499096	0.0	0.0	0.0	GO:0032970	25|387|397|775|1627|3397|5142|6281|8500|10094|10142|10178|55845	0.0	19.0	ABL1|RHOA|ARHGDIB|CACNA1C|DBN1|ID1|PDE4B|S100A10|PPFIA1|ARPC3|AKAP9|TENM1|BRK1	32		-0.8370916271212344	-2.4085363629158665	19_GO:0050789 regulation of biological process	32		0.9044033880268492	GO:0032970		3.2405148980306473
1204	20.0	713.0	20.0	392.0	28133.0		5.1020408163265305	-2.5800571502974092	1.0	M1	1.0	8.6991341991342	-5.011477024101827		GO Biological Processes	19.0		supramolecular fiber organization	2.013123622520537	0.0	0.0	0.0	GO:0097435	25|226|387|402|1627|2280|2876|3397|5573|6188|6281|8500|10094|10142|10178|10300|10471|11235|55845|133522	0.0	19.0	ABL1|ALDOA|RHOA|ARL2|DBN1|FKBP1A|GPX1|ID1|PRKAR1A|RPS3|S100A10|PPFIA1|ARPC3|AKAP9|TENM1|KATNB1|PFDN6|PDCD10|BRK1|PPARGC1B	33		-0.9486931970129185	-2.5800571502974092	19_GO:0071840 cellular component organization or biogenesis	33		1.1113666677825735	GO:0097435		3.2572850283519825
1205	16.0	492.0	16.0	392.0	28133.0		4.081632653061225	-2.787909408148404	1.0	M1	1.0	8.6991341991342	-5.011477024101827		GO Biological Processes	19.0		regulation of protein complex assembly	2.333914053426249	0.0	0.0	0.0	GO:0043254	25|402|1627|3931|4210|6188|6662|7417|10094|10142|10146|10178|10399|23521|55845|56926	0.0	19.0	ABL1|ARL2|DBN1|LCAT|MEFV|RPS3|SOX9|VDAC2|ARPC3|AKAP9|G3BP1|TENM1|RACK1|RPL13A|BRK1|NCLN	34		-1.1090317499779145	-2.787909408148404	19_GO:0071840 cellular component organization or biogenesis	34		0.9993665598252253	GO:0043254		3.5482630252879086
1206	4.0	33.0	4.0	392.0	28133.0		1.0204081632653061	-2.9572330100516844	1.0	M1	1.0	8.6991341991342	-5.011477024101827		GO Biological Processes	19.0		positive regulation of microtubule polymerization or depolymerization	8.6991341991342	0.0	0.0	0.0	GO:0031112	402|6188|10142|10300	0.0	19.0	ARL2|RPS3|AKAP9|KATNB1	35		-1.2378142890072232	-2.9572330100516844	19_GO:0048518 positive regulation of biological process	35		0.5075943249702668	GO:0031112		5.260511584470932
1207	15.0	369.0	15.0	392.0	28133.0		3.826530612244898	-3.626956371191641	1.0	M1	1.0	8.6991341991342	-5.011477024101827		GO Biological Processes	19.0		regulation of supramolecular fiber organization	2.9173925667828104	0.0	0.0	0.0	GO:1902903	25|387|402|1627|2876|3397|6188|6281|8500|10094|10142|10178|10300|10471|55845	0.0	19.0	ABL1|RHOA|ARL2|DBN1|GPX1|ID1|RPS3|S100A10|PPFIA1|ARPC3|AKAP9|TENM1|KATNB1|PFDN6|BRK1	36		-1.7480581038357443	-3.626956371191641	19_GO:0071840 cellular component organization or biogenesis	36		0.9689184016869838	GO:1902903		4.40722767305745
1208	12.0	223.0	12.0	392.0	28133.0		3.061224489795918	-4.119349458264441	1.0	M1	1.0	8.6991341991342	-5.011477024101827		GO Biological Processes	19.0		positive regulation of cytoskeleton organization	3.861947469570788	0.0	0.0	0.0	GO:0051495	25|387|402|3397|6188|6281|10094|10142|10178|10300|55558|55845	0.0	19.0	ABL1|RHOA|ARL2|ID1|RPS3|S100A10|ARPC3|AKAP9|TENM1|KATNB1|PLXNA3|BRK1	37		-2.1303074543303815	-4.119349458264441	19_GO:0048518 positive regulation of biological process	37		0.8700682497312916	GO:0051495		5.100543468323788
1209	12.0	203.0	12.0	392.0	28133.0		3.061224489795918	-4.5144217680861285	1.0	M1	1.0	8.6991341991342	-5.011477024101827		GO Biological Processes	19.0		positive regulation of supramolecular fiber organization	4.242434904996481	0.0	0.0	0.0	GO:1902905	25|387|402|2876|3397|6188|6281|10094|10142|10178|10300|55845	0.0	19.0	ABL1|RHOA|ARL2|GPX1|ID1|RPS3|S100A10|ARPC3|AKAP9|TENM1|KATNB1|BRK1	38		-2.460867927219705	-4.5144217680861285	19_GO:0048518 positive regulation of biological process	38		0.8700682497312916	GO:1902905		5.511452879980714
1214	3.0	31.0	3.0	392.0	28133.0		0.7653061224489796	-2.043944300069118	1.0	M1	1.0	12.664915966386554	-5.16680836133359		GO Biological Processes	19.0		hydrogen peroxide catabolic process	6.945276497695852	0.0	0.0	0.0	GO:0042744	2876|3039|5052	0.0	17.0	GPX1|HBA1|PRDX1	43		-0.5881290767480147	-2.043944300069118	19_GO:0008152 metabolic process	43		0.4401556971275934	GO:0042744		3.9370104823936956
1215	4.0	54.0	4.0	392.0	28133.0		1.0204081632653061	-2.1685157974376903	1.0	M1	1.0	12.664915966386554	-5.16680836133359		KEGG Pathway	24.0		Glutathione metabolism	5.3161375661375665	0.0	0.0	0.0	ko00480	2876|2936|2950|4257	0.0	17.0	GPX1|GSR|GSTP1|MGST1	44		-0.6753744229590906	-2.1685157974376903		44		0.5075943249702668	ko00480		3.773841200028861
1216	3.0	17.0	3.0	392.0	28133.0		0.7653061224489796	-2.8016742226606093	1.0	M1	1.0	12.664915966386554	-5.16680836133359		GO Biological Processes	19.0		response to hydroperoxide	12.664915966386554	0.0	0.0	0.0	GO:0033194	2876|4257|6667	0.0	17.0	GPX1|MGST1|SP1	45		-1.1185473540216473	-2.8016742226606093	19_GO:0050896 response to stimulus	45		0.4401556971275934	GO:0033194		5.7188879771564745
1217	8.0	136.0	8.0	392.0	28133.0		2.0408163265306123	-3.179412031893281	1.0	M1	1.0	12.664915966386554	-5.16680836133359		GO Biological Processes	19.0		detoxification	4.221638655462185	0.0	0.0	0.0	GO:0098754	2876|2936|2950|3039|4257|5052|5743|51714	0.0	17.0	GPX1|GSR|GSTP1|HBA1|MGST1|PRDX1|PTGS2|SELENOT	46		-1.4048380459477647	-3.179412031893281	19_GO:0098754 detoxification	46		0.71413695124874	GO:0098754		4.476852799279596
1218	8.0	119.0	8.0	392.0	28133.0		2.0408163265306123	-3.568036373507884	1.0	M1	1.0	12.664915966386554	-5.16680836133359		GO Biological Processes	19.0		cellular detoxification	4.824729891956784	0.0	0.0	0.0	GO:1990748	2876|2936|2950|3039|4257|5052|5743|51714	0.0	17.0	GPX1|GSR|GSTP1|HBA1|MGST1|PRDX1|PTGS2|SELENOT	47		-1.7018915522216742	-3.568036373507884	19_GO:0098754 detoxification	47		0.71413695124874	GO:1990748		4.970143983667457
1219	5.0	37.0	5.0	392.0	28133.0		1.2755102040816326	-3.8107211500294564	1.0	M1	1.0	12.664915966386554	-5.16680836133359		Reactome Gene Sets	6.0		Detoxification of Reactive Oxygen Species	9.698359073359073	0.0	0.0	0.0	R-HSA-3299685	2876|2936|2950|5052|25828	0.0	17.0	GPX1|GSR|GSTP1|PRDX1|TXN2	48		-1.9032008877150683	-3.8107211500294564		48		0.566775911625211	R-HSA-3299685		6.293586828588574
1220	8.0	106.0	8.0	392.0	28133.0		2.0408163265306123	-3.9151552035956123	1.0	M1	1.0	12.664915966386554	-5.16680836133359		GO Biological Processes	19.0		cellular oxidant detoxification	5.416442048517521	0.0	0.0	0.0	GO:0098869	2876|2936|2950|3039|4257|5052|5743|51714	0.0	17.0	GPX1|GSR|GSTP1|HBA1|MGST1|PRDX1|PTGS2|SELENOT	49		-1.9832015629071198	-3.9151552035956123	19_GO:0098754 detoxification	49		0.71413695124874	GO:0098869		5.415261629323696
1221	8.0	90.0	8.0	392.0	28133.0		2.0408163265306123	-4.421367881523942	1.0	M1	1.0	12.664915966386554	-5.16680836133359		WikiPathways	27.0		Selenium Micronutrient Network	6.379365079365081	0.0	0.0	0.0	WP15	2876|2936|3039|5052|5743|9403|22928|51714	0.0	17.0	GPX1|GSR|HBA1|PRDX1|PTGS2|SELENOF|SEPHS2|SELENOT	50		-2.3826089573219487	-4.421367881523942		50		0.71413695124874	WP15		6.07606372189506
1222	6.0	43.0	6.0	392.0	28133.0		1.530612244897959	-4.556335400725534	1.0	M1	1.0	12.664915966386554	-5.16680836133359		GO Biological Processes	19.0		cell redox homeostasis	10.014119601328902	0.0	0.0	0.0	GO:0045454	2876|2936|5052|23071|25828|51714	0.0	17.0	GPX1|GSR|PRDX1|ERP44|TXN2|SELENOT	51		-2.4962832668221937	-4.556335400725534	19_GO:0050789 regulation of biological process	51		0.6200692247512228	GO:0045454		7.031758648169478
1223	3.0	22.0	3.0	392.0	28133.0		0.7653061224489796	-2.4690526226241274	1.0	M1	1.0	9.786525974025974	-5.191731136073756		GO Biological Processes	19.0		organism emergence from protective structure	9.786525974025974	0.0	0.0	0.0	GO:0071684	54880|201895|338596	0.0	16.0	BCOR|SMIM14|ST8SIA6	52		-0.8747635722082368	-2.4690526226241274	19_GO:0032501 multicellular organismal process	52		0.4401556971275934	GO:0071684		4.900864234952175
1224	3.0	22.0	3.0	392.0	28133.0		0.7653061224489796	-2.4690526226241274	1.0	M1	1.0	9.786525974025974	-5.191731136073756		GO Biological Processes	19.0		hatching	9.786525974025974	0.0	0.0	0.0	GO:0035188	54880|201895|338596	0.0	16.0	BCOR|SMIM14|ST8SIA6	53		-0.8747635722082368	-2.4690526226241274	19_GO:0032502 developmental process	53		0.4401556971275934	GO:0035188		4.900864234952175
1225	3.0	22.0	3.0	392.0	28133.0		0.7653061224489796	-2.4690526226241274	1.0	M1	1.0	9.786525974025974	-5.191731136073756		GO Biological Processes	19.0		blastocyst hatching	9.786525974025974	0.0	0.0	0.0	GO:0001835	54880|201895|338596	0.0	16.0	BCOR|SMIM14|ST8SIA6	54		-0.8747635722082368	-2.4690526226241274	19_GO:0032502 developmental process	54		0.4401556971275934	GO:0001835		4.900864234952175
1226	6.0	88.0	6.0	392.0	28133.0		1.530612244897959	-2.835485061761051	1.0	M1	1.0	9.786525974025974	-5.191731136073756		GO Biological Processes	19.0		blastocyst development	4.893262987012987	0.0	0.0	0.0	GO:0001824	1603|6498|54880|201895|285855|338596	0.0	16.0	DAD1|SKIL|BCOR|SMIM14|RPL7L1|ST8SIA6	55		-1.1430978320028848	-2.835485061761051	19_GO:0032502 developmental process	55		0.6200692247512228	GO:0001824		4.348201250358048
1227	14.0	333.0	14.0	392.0	28133.0		3.5714285714285716	-3.569741360705126	1.0	M1	1.0	9.786525974025974	-5.191731136073756		GO Biological Processes	19.0		in utero embryonic development	3.017267267267268	0.0	0.0	0.0	GO:0001701	207|1051|1603|1627|2624|3633|6498|7320|10365|54880|55845|201895|285855|338596	0.0	16.0	AKT1|CEBPB|DAD1|DBN1|GATA2|INPP5B|SKIL|UBE2B|KLF2|BCOR|BRK1|SMIM14|RPL7L1|ST8SIA6	56		-1.7021978442263515	-3.569741360705126	19_GO:0032502 developmental process	56		0.9373047485139712	GO:0001701		4.401953414092051
1228	23.0	590.0	23.0	392.0	28133.0		5.86734693877551	-4.963059364371229	1.0	M1	1.0	9.786525974025974	-5.191731136073756		GO Biological Processes	19.0		embryo development ending in birth or egg hatching	2.797730024213075	0.0	0.0	0.0	GO:0009792	25|207|1051|1603|1627|2624|3633|4323|5087|6498|6662|7289|7320|8642|10159|10365|54880|55845|144165|201895|285855|338596|441478	0.0	16.0	ABL1|AKT1|CEBPB|DAD1|DBN1|GATA2|INPP5B|MMP14|PBX1|SKIL|SOX9|TULP3|UBE2B|DCHS1|ATP6AP2|KLF2|BCOR|BRK1|PRICKLE1|SMIM14|RPL7L1|ST8SIA6|NRARP	57		-2.8570071850380745	-4.963059364371229	19_GO:0032502 developmental process	57		1.1869925701863226	GO:0009792		5.2459861320888095
1229	21.0	786.0	21.0	392.0	28133.0		5.357142857142857	-2.4365130959243895	1.0	M1	1.0	7.360805860805862	-5.4241088540044595		GO Biological Processes	19.0		cardiovascular system development	1.9174618320610688	0.0	0.0	0.0	GO:0072358	25|93|207|347|387|694|1944|2624|2876|3397|3685|4323|4772|5743|6667|7541|10365|11235|144165|219699|441478	0.0	15.0	ABL1|ACVR2B|AKT1|APOD|RHOA|BTG1|EFNA3|GATA2|GPX1|ID1|ITGAV|MMP14|NFATC1|PTGS2|SP1|ZBTB14|KLF2|PDCD10|PRICKLE1|UNC5B|NRARP	58		-0.8564823576140819	-2.4365130959243895	19_GO:0032502 developmental process	58		1.1372802614876918	GO:0072358		3.1011781495679887
1230	21.0	786.0	21.0	392.0	28133.0		5.357142857142857	-2.4365130959243895	1.0	M1	1.0	7.360805860805862	-5.4241088540044595		GO Biological Processes	19.0		vasculature development	1.9174618320610688	0.0	0.0	0.0	GO:0001944	25|93|207|347|387|694|1944|2624|2876|3397|3685|4323|4772|5743|6667|7541|10365|11235|144165|219699|441478	0.0	15.0	ABL1|ACVR2B|AKT1|APOD|RHOA|BTG1|EFNA3|GATA2|GPX1|ID1|ITGAV|MMP14|NFATC1|PTGS2|SP1|ZBTB14|KLF2|PDCD10|PRICKLE1|UNC5B|NRARP	59		-0.8564823576140819	-2.4365130959243895	19_GO:0032502 developmental process	59		1.1372802614876918	GO:0001944		3.1011781495679887
1231	15.0	474.0	15.0	392.0	28133.0		3.826530612244898	-2.535947123407388	1.0	M1	1.0	7.360805860805862	-5.4241088540044595		GO Biological Processes	19.0		ameboidal-type cell migration	2.271134719710669	0.0	0.0	0.0	GO:0001667	25|207|387|397|2624|2821|2876|3397|5743|6662|6667|9839|10501|11221|11235	0.0	15.0	ABL1|AKT1|RHOA|ARHGDIB|GATA2|GPI|GPX1|ID1|PTGS2|SOX9|SP1|ZEB2|SEMA6B|DUSP10|PDCD10	60		-0.9134384153709834	-2.535947123407388	19_GO:0040011 locomotion	60		0.9689184016869838	GO:0001667		3.3177586991615486
1232	4.0	39.0	4.0	392.0	28133.0		1.0204081632653061	-2.6825261420863105	1.0	M1	1.0	7.360805860805862	-5.4241088540044595		GO Biological Processes	19.0		negative regulation of Notch signaling pathway	7.360805860805862	0.0	0.0	0.0	GO:0045746	207|2624|4323|441478	0.0	15.0	AKT1|GATA2|MMP14|NRARP	61		-1.032041831907976	-2.6825261420863105	19_GO:0048519 negative regulation of biological process	61		0.5075943249702668	GO:0045746		4.7251971873853025
1233	13.0	366.0	13.0	392.0	28133.0		3.316326530612245	-2.690703716065702	1.0	M1	1.0	7.360805860805862	-5.4241088540044595		GO Biological Processes	19.0		tissue migration	2.549131537861046	0.0	0.0	0.0	GO:0090130	25|207|387|2624|2821|2876|3397|5743|6662|6667|9839|11221|11235	0.0	15.0	ABL1|AKT1|RHOA|GATA2|GPI|GPX1|ID1|PTGS2|SOX9|SP1|ZEB2|DUSP10|PDCD10	62		-1.037662218036574	-2.690703716065702	19_GO:0032501 multicellular organismal process	62		0.9044033880268492	GO:0090130		3.546064573878989
1234	6.0	93.0	6.0	392.0	28133.0		1.530612244897959	-2.712501818290245	1.0	M1	1.0	7.360805860805862	-5.4241088540044595		GO Biological Processes	19.0		cell migration involved in sprouting angiogenesis	4.630184331797235	0.0	0.0	0.0	GO:0002042	25|207|387|2624|5743|11235	0.0	15.0	ABL1|AKT1|RHOA|GATA2|PTGS2|PDCD10	63		-1.0525666123132167	-2.712501818290245	19_GO:0040011 locomotion	63		0.6200692247512228	GO:0002042		4.168342815986193
1235	13.0	361.0	13.0	392.0	28133.0		3.316326530612245	-2.742861456150536	1.0	M1	1.0	7.360805860805862	-5.4241088540044595		GO Biological Processes	19.0		epithelium migration	2.5844380688563513	0.0	0.0	0.0	GO:0090132	25|207|387|2624|2821|2876|3397|5743|6662|6667|9839|11221|11235	0.0	15.0	ABL1|AKT1|RHOA|GATA2|GPI|GPX1|ID1|PTGS2|SOX9|SP1|ZEB2|DUSP10|PDCD10	64		-1.072136034575077	-2.742861456150536	19_GO:0032501 multicellular organismal process	64		0.9044033880268492	GO:0090132		3.601700307124501
1236	13.0	358.0	13.0	392.0	28133.0		3.316326530612245	-2.774686289901591	1.0	M1	1.0	7.360805860805862	-5.4241088540044595		GO Biological Processes	19.0		epithelial cell migration	2.6060953711093378	0.0	0.0	0.0	GO:0010631	25|207|387|2624|2821|2876|3397|5743|6662|6667|9839|11221|11235	0.0	15.0	ABL1|AKT1|RHOA|GATA2|GPI|GPX1|ID1|PTGS2|SOX9|SP1|ZEB2|DUSP10|PDCD10	65		-1.099728210340056	-2.774686289901591	19_GO:0040011 locomotion	65		0.9044033880268492	GO:0010631		3.635533004449634
1237	9.0	176.0	9.0	392.0	28133.0		2.295918367346939	-3.069772299887514	1.0	M1	1.0	7.360805860805862	-5.4241088540044595		GO Biological Processes	19.0		blood vessel endothelial cell migration	3.6699472402597406	0.0	0.0	0.0	GO:0043534	25|207|387|2624|2876|3397|5743|6667|11235	0.0	15.0	ABL1|AKT1|RHOA|GATA2|GPX1|ID1|PTGS2|SP1|PDCD10	66		-1.3183221127891354	-3.069772299887514	19_GO:0040011 locomotion	66		0.756469706802007	GO:0043534		4.223728673270303
1245	3.0	11.0	3.0	392.0	28133.0		0.7653061224489796	-3.3897269970901376	1.0	M1	1.0	22.427455357142858	-5.705339985653938		CORUM	33.0		Respiratory chain complex I (incomplete intermediate), mitochondrial	19.573051948051948	0.0	0.0	0.0	CORUM:2948	4705|4724|4729	0.0	13.0	NDUFA10|NDUFS4|NDUFV2	74		-1.569897885569867	-3.3897269970901376		74		0.4401556971275934	CORUM:2948		7.323839120331457
1246	3.0	11.0	3.0	392.0	28133.0		0.7653061224489796	-3.3897269970901376	1.0	M1	1.0	22.427455357142858	-5.705339985653938		CORUM	33.0		Respiratory chain complex I (intermediate), mitochondrial	19.573051948051948	0.0	0.0	0.0	CORUM:2905	4722|4724|4729	0.0	13.0	NDUFS3|NDUFS4|NDUFV2	75		-1.569897885569867	-3.3897269970901376		75		0.4401556971275934	CORUM:2905		7.323839120331457
1247	3.0	10.0	3.0	392.0	28133.0		0.7653061224489796	-3.523523414512705	1.0	M1	1.0	22.427455357142858	-5.705339985653938		CORUM	33.0		Respiratory chain complex I (intermediate VII/650kD), mitochondrial	21.53035714285714	0.0	0.0	0.0	CORUM:2904	4722|4724|4729	0.0	13.0	NDUFS3|NDUFS4|NDUFV2	76		-1.6800662265883515	-3.523523414512705		76		0.4401556971275934	CORUM:2904		7.718767554356903
1255	5.0	89.0	5.0	392.0	28133.0		1.2755102040816326	-2.0874798376177606	1.0	M1	1.0	43.06071428571428	-5.879844724302334		GO Biological Processes	19.0		kidney morphogenesis	4.031902086677368	0.0	0.0	0.0	GO:0060993	5087|6662|8642|120892|153572	0.0	11.0	PBX1|SOX9|DCHS1|LRRK2|IRX2	84		-0.6206547028359434	-2.0874798376177606	19_GO:0032502 developmental process	84		0.566775911625211	GO:0060993		3.4054340784544785
1256	3.0	22.0	3.0	392.0	28133.0		0.7653061224489796	-2.4690526226241274	1.0	M1	1.0	43.06071428571428	-5.879844724302334		GO Biological Processes	19.0		regulation of cell maturation	9.786525974025974	0.0	0.0	0.0	GO:1903429	9175|53335|120892	0.0	11.0	MAP3K13|BCL11A|LRRK2	85		-0.8747635722082368	-2.4690526226241274	19_GO:0032502 developmental process	85		0.4401556971275934	GO:1903429		4.900864234952175
1257	5.0	48.0	5.0	392.0	28133.0		1.2755102040816326	-3.2709655965050164	1.0	M1	1.0	43.06071428571428	-5.879844724302334		GO Biological Processes	19.0		regulation of morphogenesis of a branching structure	7.4758184523809526	0.0	0.0	0.0	GO:0060688	25|6662|9175|53335|120892	0.0	11.0	ABL1|SOX9|MAP3K13|BCL11A|LRRK2	86		-1.478587949397821	-3.2709655965050164	19_GO:0032502 developmental process	86		0.566775911625211	GO:0060688		5.337776080850965
1258	10.0	186.0	10.0	392.0	28133.0		2.5510204081632653	-3.5230975931897195	1.0	M1	1.0	43.06071428571428	-5.879844724302334		GO Biological Processes	19.0		morphogenesis of a branching structure	3.8584869431643627	0.0	0.0	0.0	GO:0001763	25|473|4323|5087|6662|8642|9175|53335|120892|441478	0.0	11.0	ABL1|RERE|MMP14|PBX1|SOX9|DCHS1|MAP3K13|BCL11A|LRRK2|NRARP	87		-1.6800662265883515	-3.5230975931897195	19_GO:0032502 developmental process	87		0.7963474265091894	GO:0001763		4.649511959678633
1259	3.0	10.0	3.0	392.0	28133.0		0.7653061224489796	-3.523523414512705	1.0	M1	1.0	43.06071428571428	-5.879844724302334		GO Biological Processes	19.0		regulation of neuron maturation	21.53035714285714	0.0	0.0	0.0	GO:0014041	9175|53335|120892	0.0	11.0	MAP3K13|BCL11A|LRRK2	88		-1.6800662265883515	-3.523523414512705	19_GO:0032502 developmental process	88		0.4401556971275934	GO:0014041		7.718767554356903
1260	9.0	152.0	9.0	392.0	28133.0		2.295918367346939	-3.531080834177159	1.0	M1	1.0	43.06071428571428	-5.879844724302334		GO Biological Processes	19.0		anatomical structure maturation	4.249412593984963	0.0	0.0	0.0	GO:0071695	387|473|8642|9175|10159|10365|53335|79670|120892	0.0	11.0	RHOA|RERE|DCHS1|MAP3K13|ATP6AP2|KLF2|BCL11A|TUT7|LRRK2	89		-1.6800662265883515	-3.531080834177159	19_GO:0032502 developmental process	89		0.756469706802007	GO:0071695		4.775043357068382
1261	3.0	5.0	3.0	392.0	28133.0		0.7653061224489796	-4.580126946176903	1.0	M1	1.0	43.06071428571428	-5.879844724302334		GO Biological Processes	19.0		regulation of branching morphogenesis of a nerve	43.06071428571428	0.0	0.0	0.0	GO:2000172	9175|53335|120892	0.0	11.0	MAP3K13|BCL11A|LRRK2	90		-2.515687962025449	-4.580126946176903	19_GO:0032502 developmental process	90		0.4401556971275934	GO:2000172		11.180841756068778
1262	4.0	10.0	4.0	392.0	28133.0		1.0204081632653061	-5.136957609175915	1.0	M1	1.0	43.06071428571428	-5.879844724302334		GO Biological Processes	19.0		branching morphogenesis of a nerve	28.707142857142863	0.0	0.0	0.0	GO:0048755	473|9175|53335|120892	0.0	11.0	RERE|MAP3K13|BCL11A|LRRK2	91		-3.0085013202411415	-5.136957609175915	19_GO:0032502 developmental process	91		0.5075943249702668	GO:0048755		10.417012905401558
1264	7.0	86.0	7.0	392.0	28133.0		1.7857142857142858	-3.694966442437834	1.0	M1	1.0	30.757653061224488	-6.421014797141004		GO Biological Processes	19.0		aerobic respiration	5.841569767441861	0.0	0.0	0.0	GO:0009060	513|664|1337|1345|1351|9377|84701	0.0	9.0	ATP5F1D|BNIP3|COX6A1|COX6C|COX8A|COX5A|COX4I2	93		-1.8044085625369441	-3.694966442437834	19_GO:0008152 metabolic process	93		0.6688831939860661	GO:0009060		5.345329661526442
1265	3.0	7.0	3.0	392.0	28133.0		0.7653061224489796	-4.045099218535301	1.0	M1	1.0	30.757653061224488	-6.421014797141004		WikiPathways	27.0		Arachidonate Epoxygenase / Epoxide Hydrolase	30.757653061224488	0.0	0.0	0.0	WP678	1351|2950|9377	0.0	9.0	COX8A|GSTP1|COX5A	94		-2.0700093742026855	-4.045099218535301		94		0.4401556971275934	WP678		9.360003079201253
1266	5.0	21.0	5.0	392.0	28133.0		1.2755102040816326	-5.062020083203254	1.0	M1	1.0	30.757653061224488	-6.421014797141004		GO Biological Processes	19.0		aerobic electron transport chain	17.087585034013607	0.0	0.0	0.0	GO:0019646	1337|1345|1351|9377|84701	0.0	9.0	COX6A1|COX6C|COX8A|COX5A|COX4I2	95		-2.948627540704356	-5.062020083203254	19_GO:0008152 metabolic process	95		0.566775911625211	GO:0019646		8.766715490533095
1267	5.0	21.0	5.0	392.0	28133.0		1.2755102040816326	-5.062020083203254	1.0	M1	1.0	30.757653061224488	-6.421014797141004		GO Biological Processes	19.0		mitochondrial electron transport, cytochrome c to oxygen	17.087585034013607	0.0	0.0	0.0	GO:0006123	1337|1345|1351|9377|84701	0.0	9.0	COX6A1|COX6C|COX8A|COX5A|COX4I2	96		-2.948627540704356	-5.062020083203254	19_GO:0008152 metabolic process	96		0.566775911625211	GO:0006123		8.766715490533095
1268	6.0	35.0	6.0	392.0	28133.0		1.530612244897959	-5.090244629817764	1.0	M1	1.0	30.757653061224488	-6.421014797141004		WikiPathways	27.0		Mitochondrial CIV Assembly	12.303061224489795	0.0	0.0	0.0	WP4922	1337|1345|1347|1351|9377|116228	0.0	9.0	COX6A1|COX6C|COX7A2|COX8A|COX5A|COX20	97		-2.971888667787317	-5.090244629817764		97		0.6200692247512228	WP4922		7.953800246484363
1269	18.0	365.0	18.0	392.0	28133.0		4.591836734693878	-5.355220169163725	1.0	M1	1.0	30.757653061224488	-6.421014797141004		Reactome Gene Sets	6.0		Transcriptional Regulation by TP53	3.5392367906066537	0.0	0.0	0.0	R-HSA-3700989	207|900|1027|1337|1345|1351|2353|2821|2936|5052|5983|6921|8649|8795|9337|9377|57459|116228	0.0	9.0	AKT1|CCNG1|CDKN1B|COX6A1|COX6C|COX8A|FOS|GPI|GSR|PRDX1|RFC3|ELOC|LAMTOR3|TNFRSF10B|CNOT8|COX5A|GATAD2B|COX20	98		-3.2004349415066025	-5.355220169163725		98		1.0571654303469598	R-HSA-3700989		5.804430499945833
1270	9.0	78.0	9.0	392.0	28133.0		2.295918367346939	-5.850348750798201	1.0	M1	1.0	30.757653061224488	-6.421014797141004		KEGG Pathway	24.0		Cardiac muscle contraction	8.280906593406595	0.0	0.0	0.0	ko04260	483|775|1337|1345|1347|1351|1537|9377|84701	0.0	9.0	ATP1B3|CACNA1C|COX6A1|COX6C|COX7A2|COX8A|CYC1|COX5A|COX4I2	99		-3.6375715761633916	-5.850348750798201		99		0.756469706802007	ko04260		7.654378011703402
1271	10.0	91.0	10.0	392.0	28133.0		2.5510204081632653	-6.23660383535724	1.0	M1	1.0	30.757653061224488	-6.421014797141004		KEGG Pathway	24.0		Cardiac muscle contraction	7.886577708006279	0.0	0.0	0.0	hsa04260	483|775|1337|1345|1347|1351|1537|5743|9377|84701	0.0	9.0	ATP1B3|CACNA1C|COX6A1|COX6C|COX7A2|COX8A|CYC1|PTGS2|COX5A|COX4I2	100		-3.994969920699957	-6.23660383535724		100		0.7963474265091894	hsa04260		7.821714104788729
1272	12.0	314.0	12.0	392.0	28133.0		3.061224489795918	-2.785599662603151	1.0	M1	1.0	3.87934362934363	-6.656937155231599		GO Biological Processes	19.0		negative regulation of cell development	2.7427206551410372	0.0	0.0	0.0	GO:0010721	387|2290|3397|5087|6662|10501|11221|29116|29956|53335|55558|120892	0.0	8.0	RHOA|FOXG1|ID1|PBX1|SOX9|SEMA6B|DUSP10|MYLIP|CERS2|BCL11A|PLXNA3|LRRK2	101		-1.1090317499779145	-2.785599662603151	19_GO:0048519 negative regulation of biological process	101		0.8700682497312916	GO:0010721		3.6915106617410807
1273	9.0	184.0	9.0	392.0	28133.0		2.295918367346939	-2.934022117812427	1.0	M1	1.0	3.87934362934363	-6.656937155231599		GO Biological Processes	19.0		negative regulation of cell projection organization	3.5103843167701867	0.0	0.0	0.0	GO:0031345	387|2904|3397|10501|29116|29956|53335|55558|120892	0.0	8.0	RHOA|GRIN2B|ID1|SEMA6B|MYLIP|CERS2|BCL11A|PLXNA3|LRRK2	102		-1.2206863821343683	-2.934022117812427	19_GO:0048519 negative regulation of biological process	102		0.756469706802007	GO:0031345		4.06114288220621
1274	8.0	148.0	8.0	392.0	28133.0		2.0408163265306123	-2.940506023297656	1.0	M1	1.0	3.87934362934363	-6.656937155231599		GO Biological Processes	19.0		negative regulation of neuron projection development	3.87934362934363	0.0	0.0	0.0	GO:0010977	387|3397|10501|29116|29956|53335|55558|120892	0.0	8.0	RHOA|ID1|SEMA6B|MYLIP|CERS2|BCL11A|PLXNA3|LRRK2	103		-1.2257628298563323	-2.940506023297656	19_GO:0048519 negative regulation of biological process	103		0.71413695124874	GO:0010977		4.17487985398852
1275	21.0	710.0	21.0	392.0	28133.0		5.357142857142857	-2.9609986908100034	1.0	M1	1.0	3.87934362934363	-6.656937155231599		GO Biological Processes	19.0		brain development	2.122711267605634	0.0	0.0	0.0	GO:0007420	25|347|387|473|664|2290|2624|2904|3397|4722|4724|5087|6453|6585|7289|7546|10891|23287|55558|57282|120892	0.0	8.0	ABL1|APOD|RHOA|RERE|BNIP3|FOXG1|GATA2|GRIN2B|ID1|NDUFS3|NDUFS4|PBX1|ITSN1|SLIT1|TULP3|ZIC2|PPARGC1A|AGTPBP1|PLXNA3|SLC4A10|LRRK2	104		-1.2385813768503218	-2.9609986908100034	19_GO:0032502 developmental process	104		1.1372802614876918	GO:0007420		3.6018204166428496
1276	22.0	742.0	22.0	392.0	28133.0		5.612244897959184	-3.08976945211187	1.0	M1	1.0	3.87934362934363	-6.656937155231599		GO Biological Processes	19.0		negative regulation of cell differentiation	2.127887947631883	0.0	0.0	0.0	GO:0045596	387|2290|2624|3397|3399|3685|4772|5087|6498|6662|6935|10501|11221|29116|29956|51043|53335|55558|84814|120892|144165|441478	0.0	8.0	RHOA|FOXG1|GATA2|ID1|ID3|ITGAV|NFATC1|PBX1|SKIL|SOX9|ZEB1|SEMA6B|DUSP10|MYLIP|CERS2|ZBTB7B|BCL11A|PLXNA3|PLPP7|LRRK2|PRICKLE1|NRARP	105		-1.3318371374855713	-3.08976945211187	19_GO:0048519 negative regulation of biological process	105		1.1624736084356109	GO:0045596		3.701231471364203
1277	12.0	269.0	12.0	392.0	28133.0		3.061224489795918	-3.366516393796735	1.0	M1	1.0	3.87934362934363	-6.656937155231599		GO Biological Processes	19.0		negative regulation of neurogenesis	3.20154009559214	0.0	0.0	0.0	GO:0050768	387|2290|3397|5087|6662|10501|11221|29116|29956|53335|55558|120892	0.0	8.0	RHOA|FOXG1|ID1|PBX1|SOX9|SEMA6B|DUSP10|MYLIP|CERS2|BCL11A|PLXNA3|LRRK2	106		-1.550436610442868	-3.366516393796735	19_GO:0048519 negative regulation of biological process	106		0.8700682497312916	GO:0050768		4.312839440771326
1278	11.0	210.0	11.0	392.0	28133.0		2.806122448979592	-3.721160161089825	1.0	M1	1.0	3.87934362934363	-6.656937155231599		GO Biological Processes	19.0		negative regulation of neuron differentiation	3.759268707482993	0.0	0.0	0.0	GO:0045665	387|2290|3397|5087|6662|10501|29116|29956|53335|55558|120892	0.0	8.0	RHOA|FOXG1|ID1|PBX1|SOX9|SEMA6B|MYLIP|CERS2|BCL11A|PLXNA3|LRRK2	107		-1.8291225711308872	-3.721160161089825	19_GO:0048519 negative regulation of biological process	107		0.8341222957905684	GO:0045665		4.770950235840721
1279	25.0	751.0	25.0	392.0	28133.0		6.377551020408164	-4.205626510602891	1.0	M1	1.0	3.87934362934363	-6.656937155231599		GO Biological Processes	19.0		head development	2.389076469469279	0.0	0.0	0.0	GO:0060322	25|347|387|473|664|2290|2624|2904|3397|4323|4722|4724|5087|6453|6585|6662|7289|7546|10159|10891|23287|55558|57282|64651|120892	0.0	8.0	ABL1|APOD|RHOA|RERE|BNIP3|FOXG1|GATA2|GRIN2B|ID1|MMP14|NDUFS3|NDUFS4|PBX1|ITSN1|SLIT1|SOX9|TULP3|ZIC2|ATP6AP2|PPARGC1A|AGTPBP1|PLXNA3|SLC4A10|CSRNP1|LRRK2	108		-2.210333280181988	-4.205626510602891	19_GO:0032502 developmental process	108		1.234167017505837	GO:0060322		4.586652330167292
1280	14.0	289.0	14.0	392.0	28133.0		3.5714285714285716	-4.211557702674831	1.0	M1	1.0	3.87934362934363	-6.656937155231599		GO Biological Processes	19.0		negative regulation of nervous system development	3.4766435986159174	0.0	0.0	0.0	GO:0051961	387|2290|3397|5087|6585|6662|7289|10501|11221|29116|29956|53335|55558|120892	0.0	8.0	RHOA|FOXG1|ID1|PBX1|SLIT1|SOX9|TULP3|SEMA6B|DUSP10|MYLIP|CERS2|BCL11A|PLXNA3|LRRK2	109		-2.212487974701672	-4.211557702674831	19_GO:0048519 negative regulation of biological process	109		0.9373047485139712	GO:0051961		5.030705618414689
1281	11.0	253.0	11.0	392.0	28133.0		2.806122448979592	-3.0407771389111766	1.0	M1	1.0	4.457630878438332	-7.175874264605522		GO Biological Processes	19.0		positive regulation of growth	3.1203416149068324	0.0	0.0	0.0	GO:0045927	207|551|1444|1627|4323|5645|9175|9798|11116|22999|23025	0.0	7.0	AKT1|AVP|CSHL1|DBN1|MMP14|PRSS2|MAP3K13|IST1|CEP43|RIMS1|UNC13A	110		-1.2978219802545305	-3.0407771389111766	19_GO:0040007 growth	110		0.8341222957905684	GO:0045927		4.027188839932791
1282	11.0	245.0	11.0	392.0	28133.0		2.806122448979592	-3.1548323915543053	1.0	M1	1.0	4.457630878438332	-7.175874264605522		GO Biological Processes	19.0		negative regulation of growth	3.2222303206997083	0.0	0.0	0.0	GO:0045926	323|694|1027|4722|9538|10399|10501|11221|53335|55558|57446	0.0	7.0	APBB2|BTG1|CDKN1B|NDUFS3|EI24|RACK1|SEMA6B|DUSP10|BCL11A|PLXNA3|NDRG3	111		-1.3892132482617154	-3.1548323915543053	19_GO:0040007 growth	111		0.8341222957905684	GO:0045926		4.152844866569863
1283	10.0	185.0	10.0	392.0	28133.0		2.5510204081632653	-3.5417882904425633	1.0	M1	1.0	4.457630878438332	-7.175874264605522		GO Biological Processes	19.0		negative regulation of cell growth	3.8793436293436296	0.0	0.0	0.0	GO:0030308	323|694|1027|4722|9538|10399|10501|53335|55558|57446	0.0	7.0	APBB2|BTG1|CDKN1B|NDUFS3|EI24|RACK1|SEMA6B|BCL11A|PLXNA3|NDRG3	112		-1.6853102001139488	-3.5417882904425633	19_GO:0040007 growth	112		0.7963474265091894	GO:0030308		4.670746279874346
1284	10.0	161.0	10.0	392.0	28133.0		2.5510204081632653	-4.0339876654411135	1.0	M1	1.0	4.457630878438332	-7.175874264605522		GO Biological Processes	19.0		positive regulation of cell growth	4.457630878438332	0.0	0.0	0.0	GO:0030307	207|551|1627|4323|5645|9175|9798|11116|22999|23025	0.0	7.0	AKT1|AVP|DBN1|MMP14|PRSS2|MAP3K13|IST1|CEP43|RIMS1|UNC13A	113		-2.0637030635605	-4.0339876654411135	19_GO:0040007 growth	113		0.7963474265091894	GO:0030307		5.230125232903838
1285	24.0	648.0	24.0	392.0	28133.0		6.122448979591836	-4.788871918849035	1.0	M1	1.0	4.457630878438332	-7.175874264605522		GO Biological Processes	19.0		regulation of growth	2.658068783068783	0.0	0.0	0.0	GO:0040008	25|207|323|551|694|1027|1444|1627|4323|4722|5645|9175|9538|9798|10399|10495|10501|11116|11221|22999|23025|53335|55558|57446	0.0	7.0	ABL1|AKT1|APBB2|AVP|BTG1|CDKN1B|CSHL1|DBN1|MMP14|NDUFS3|PRSS2|MAP3K13|EI24|IST1|RACK1|ENOX2|SEMA6B|CEP43|DUSP10|RIMS1|UNC13A|BCL11A|PLXNA3|NDRG3	114		-2.6924177982664177	-4.788871918849035	19_GO:0040007 growth	114		1.2108781141279994	GO:0040008		5.076033233095715
1286	21.0	409.0	21.0	392.0	28133.0		5.357142857142857	-6.434575659851959	1.0	M1	1.0	4.457630878438332	-7.175874264605522		GO Biological Processes	19.0		regulation of cell growth	3.6849022004889975	0.0	0.0	0.0	GO:0001558	25|207|323|551|694|1027|1627|4323|4722|5645|9175|9538|9798|10399|10501|11116|22999|23025|53335|55558|57446	0.0	7.0	ABL1|AKT1|APBB2|AVP|BTG1|CDKN1B|DBN1|MMP14|NDUFS3|PRSS2|MAP3K13|EI24|IST1|RACK1|SEMA6B|CEP43|RIMS1|UNC13A|BCL11A|PLXNA3|NDRG3	115		-4.179474170494868	-6.434575659851959	19_GO:0040007 growth	115		1.1372802614876918	GO:0001558		6.501962516114595
1287	5.0	43.0	5.0	392.0	28133.0		1.2755102040816326	-3.4963804921081376	1.0	M1	1.0	15.378826530612244	-7.36480775086175		Reactome Gene Sets	6.0		Aggrephagy	8.345099667774086	0.0	0.0	0.0	R-HSA-9646399	5116|7277|7334|7846|84790	0.0	6.0	PCNT|TUBA4A|UBE2N|TUBA1A|TUBA1C	116		-1.6599195153014104	-3.4963804921081376		116		0.566775911625211	R-HSA-9646399		5.7297850921484175
1288	4.0	22.0	4.0	392.0	28133.0		1.0204081632653061	-3.6524951492763273	1.0	M1	1.0	15.378826530612244	-7.36480775086175		Reactome Gene Sets	6.0		Post-chaperonin tubulin folding pathway	13.048701298701301	0.0	0.0	0.0	R-HSA-389977	402|7277|7846|84790	0.0	6.0	ARL2|TUBA4A|TUBA1A|TUBA1C	117		-1.7707111936829427	-3.6524951492763273		117		0.5075943249702668	R-HSA-389977		6.720409118118253
1289	6.0	60.0	6.0	392.0	28133.0		1.530612244897959	-3.7283382585288547	1.0	M1	1.0	15.378826530612244	-7.36480775086175		KEGG Pathway	24.0		Pathogenic Escherichia coli infection	7.176785714285714	0.0	0.0	0.0	hsa05130	25|387|7277|7846|10094|84790	0.0	6.0	ABL1|RHOA|TUBA4A|TUBA1A|ARPC3|TUBA1C	118		-1.8320480100634635	-3.7283382585288547		118		0.6200692247512228	hsa05130		5.693456791510724
1290	6.0	55.0	6.0	392.0	28133.0		1.530612244897959	-3.9402307985659997	1.0	M1	1.0	15.378826530612244	-7.36480775086175		KEGG Pathway	24.0		Pathogenic Escherichia coli infection	7.829220779220779	0.0	0.0	0.0	ko05130	25|387|7277|7846|10094|84790	0.0	6.0	ABL1|RHOA|TUBA4A|TUBA1A|ARPC3|TUBA1C	119		-1.9946253523342043	-3.9402307985659997		119		0.6200692247512228	ko05130		6.026313138625097
1291	6.0	55.0	6.0	392.0	28133.0		1.530612244897959	-3.9402307985659997	1.0	M1	1.0	15.378826530612244	-7.36480775086175		WikiPathways	27.0		Pathogenic Escherichia coli infection	7.829220779220779	0.0	0.0	0.0	WP2272	25|387|7277|7846|10094|84790	0.0	6.0	ABL1|RHOA|TUBA4A|TUBA1A|ARPC3|TUBA1C	120		-1.9946253523342043	-3.9402307985659997		120		0.6200692247512228	WP2272		6.026313138625097
1292	8.0	101.0	8.0	392.0	28133.0		2.0408163265306123	-4.0628355112905945	1.0	M1	1.0	15.378826530612244	-7.36480775086175		Reactome Gene Sets	6.0		Protein folding	5.684582743988686	0.0	0.0	0.0	R-HSA-391251	402|7277|7846|10471|10575|22948|26330|84790	0.0	6.0	ARL2|TUBA4A|TUBA1A|PFDN6|CCT4|CCT5|GAPDHS|TUBA1C	121		-2.0841415426891534	-4.0628355112905945		121		0.71413695124874	R-HSA-391251		5.606435636228198
1293	5.0	25.0	5.0	392.0	28133.0		1.2755102040816326	-4.66514737977872	1.0	M1	1.0	15.378826530612244	-7.36480775086175		Reactome Gene Sets	6.0		Formation of tubulin folding intermediates by CCT/TriC	14.35357142857143	0.0	0.0	0.0	R-HSA-389960	7277|7846|10575|22948|84790	0.0	6.0	TUBA4A|TUBA1A|CCT4|CCT5|TUBA1C	122		-2.5872755367134	-4.66514737977872		122		0.566775911625211	R-HSA-389960		7.940260438757922
1294	6.0	32.0	6.0	392.0	28133.0		1.530612244897959	-5.328063179980031	1.0	M1	1.0	15.378826530612244	-7.36480775086175		Reactome Gene Sets	6.0		Cooperation of Prefoldin and TriC/CCT in actin and tubulin folding	13.456473214285714	0.0	0.0	0.0	R-HSA-389958	7277|7846|10471|10575|22948|84790	0.0	6.0	TUBA4A|TUBA1A|PFDN6|CCT4|CCT5|TUBA1C	123		-3.1759838456988336	-5.328063179980031		123		0.6200692247512228	R-HSA-389958		8.38091588461258
1295	6.0	28.0	6.0	392.0	28133.0		1.530612244897959	-5.688794822732845	1.0	M1	1.0	15.378826530612244	-7.36480775086175		Reactome Gene Sets	6.0		Prefoldin mediated transfer of substrate to CCT/TriC	15.378826530612244	0.0	0.0	0.0	R-HSA-389957	7277|7846|10471|10575|22948|84790	0.0	6.0	TUBA4A|TUBA1A|PFDN6|CCT4|CCT5|TUBA1C	124		-3.4942424682042352	-5.688794822732845		124		0.6200692247512228	R-HSA-389957		9.048840785883119
1296	13.0	187.0	13.0	392.0	28133.0		3.316326530612245	-5.60742827900541	1.0	M1	1.0	23.922619047619047	-7.4898904806439095		GO Biological Processes	19.0		purine ribonucleoside monophosphate biosynthetic process	4.989209320091673	0.0	0.0	0.0	GO:0009168	204|226|230|513|514|517|518|2821|4508|5210|10632|10891|26330	0.0	5.0	AK2|ALDOA|ALDOC|ATP5F1D|ATP5F1E|ATP5MC2|ATP5MC3|GPI|ATP6|PFKFB4|ATP5MG|PPARGC1A|GAPDHS	125		-3.4246143277480443	-5.60742827900541	19_GO:0008152 metabolic process	125		0.9044033880268492	GO:0009168		6.506240049258584
1297	6.0	27.0	6.0	392.0	28133.0		1.530612244897959	-5.788415487779661	1.0	M1	1.0	23.922619047619047	-7.4898904806439095		GO Biological Processes	19.0		ATP synthesis coupled proton transport	15.948412698412698	0.0	0.0	0.0	GO:0015986	513|514|517|518|4508|10632	0.0	5.0	ATP5F1D|ATP5F1E|ATP5MC2|ATP5MC3|ATP6|ATP5MG	126		-3.5848463149316756	-5.788415487779661	19_GO:0051179 localization	126		0.6200692247512228	GO:0015986		9.237612112194235
1298	6.0	27.0	6.0	392.0	28133.0		1.530612244897959	-5.788415487779661	1.0	M1	1.0	23.922619047619047	-7.4898904806439095		GO Biological Processes	19.0		energy coupled proton transport, down electrochemical gradient	15.948412698412698	0.0	0.0	0.0	GO:0015985	513|514|517|518|4508|10632	0.0	5.0	ATP5F1D|ATP5F1E|ATP5MC2|ATP5MC3|ATP6|ATP5MG	127		-3.5848463149316756	-5.788415487779661	19_GO:0051179 localization	127		0.6200692247512228	GO:0015985		9.237612112194235
1299	8.0	56.0	8.0	392.0	28133.0		2.0408163265306123	-5.979568864893973	1.0	M1	1.0	23.922619047619047	-7.4898904806439095		GO Biological Processes	19.0		inner mitochondrial membrane organization	10.252551020408164	0.0	0.0	0.0	GO:0007007	513|514|517|518|4508|10632|26519|140823	0.0	5.0	ATP5F1D|ATP5F1E|ATP5MC2|ATP5MC3|ATP6|ATP5MG|TIMM10|ROMO1	128		-3.7542025629511433	-5.979568864893973	19_GO:0071840 cellular component organization or biogenesis	128		0.71413695124874	GO:0007007		8.23877102159991
1300	11.0	118.0	11.0	392.0	28133.0		2.806122448979592	-6.073865380823526	1.0	M1	1.0	23.922619047619047	-7.4898904806439095		GO Biological Processes	19.0		mitochondrial transmembrane transport	6.690223970944309	0.0	0.0	0.0	GO:1990542	513|514|517|518|4508|10632|26519|51660|79751|119559|140823	0.0	5.0	ATP5F1D|ATP5F1E|ATP5MC2|ATP5MC3|ATP6|ATP5MG|TIMM10|MPC1|SLC25A22|SFXN4|ROMO1	129		-3.845293939005485	-6.073865380823526	19_GO:0051179 localization	129		0.8341222957905684	GO:1990542		7.363042933049702
1301	24.0	537.0	24.0	392.0	28133.0		6.122448979591836	-6.174801709278975	1.0	M1	1.0	23.922619047619047	-7.4898904806439095		GO Biological Processes	19.0		monovalent inorganic cation transport	3.207501995211492	0.0	0.0	0.0	GO:0015672	207|483|513|514|517|518|525|967|1337|1345|1347|1351|3748|3782|4508|5348|6324|7402|9377|10142|10632|57282|57419|84701	0.0	5.0	AKT1|ATP1B3|ATP5F1D|ATP5F1E|ATP5MC2|ATP5MC3|ATP6V1B1|CD63|COX6A1|COX6C|COX7A2|COX8A|KCNC3|KCNN3|ATP6|FXYD1|SCN1B|UTRN|COX5A|AKAP9|ATP5MG|SLC4A10|SLC24A3|COX4I2	130		-3.9364704301717772	-6.174801709278975	19_GO:0051179 localization	130		1.2108781141279994	GO:0015672		6.1397043850113295
1302	6.0	22.0	6.0	392.0	28133.0		1.530612244897959	-6.361316257461159	1.0	M1	1.0	23.922619047619047	-7.4898904806439095		GO Biological Processes	19.0		mitochondrial ATP synthesis coupled proton transport	19.573051948051948	0.0	0.0	0.0	GO:0042776	513|514|517|518|4508|10632	0.0	5.0	ATP5F1D|ATP5F1E|ATP5MC2|ATP5MC3|ATP6|ATP5MG	131		-4.1163543994549485	-6.361316257461159	19_GO:0051179 localization	131		0.6200692247512228	GO:0042776		10.359498884450408
1303	6.0	18.0	6.0	392.0	28133.0		1.530612244897959	-6.9449652786903835	1.0	M1	1.0	23.922619047619047	-7.4898904806439095		Reactome Gene Sets	6.0		Formation of ATP by chemiosmotic coupling	23.922619047619047	0.0	0.0	0.0	R-HSA-163210	513|514|517|518|4508|10632	0.0	5.0	ATP5F1D|ATP5F1E|ATP5MC2|ATP5MC3|ATP6|ATP5MG	132		-4.665241314424962	-6.9449652786903835		132		0.6200692247512228	R-HSA-163210		11.564150290522775
1304	14.0	157.0	14.0	392.0	28133.0		3.5714285714285716	-7.3232622117253445	1.0	M1	1.0	23.922619047619047	-7.4898904806439095		GO Biological Processes	19.0		proton transmembrane transport	6.399681528662421	0.0	0.0	0.0	GO:1902600	513|514|517|518|525|1337|1345|1347|1351|4508|9377|10632|57282|84701	0.0	5.0	ATP5F1D|ATP5F1E|ATP5MC2|ATP5MC3|ATP6V1B1|COX6A1|COX6C|COX7A2|COX8A|ATP6|COX5A|ATP5MG|SLC4A10|COX4I2	133		-5.032542863158459	-7.3232622117253445	19_GO:0051179 localization	133		0.9373047485139712	GO:1902600		8.065057059021354
1305	17.0	365.0	17.0	392.0	28133.0		4.336734693877551	-4.769477772978624	1.0	M1	1.0	5.450723327305606	-7.969795820310332		GO Biological Processes	19.0		positive regulation of neuron differentiation	3.342612524461839	0.0	0.0	0.0	GO:0045666	387|1627|1742|2290|2624|4076|6324|6453|6498|6935|9175|9798|10300|22999|23025|55558|158866	0.0	4.0	RHOA|DBN1|DLG4|FOXG1|GATA2|CAPRIN1|SCN1B|ITSN1|SKIL|ZEB1|MAP3K13|IST1|KATNB1|RIMS1|UNC13A|PLXNA3|ZDHHC15	134		-2.677744291068591	-4.769477772978624	19_GO:0048518 positive regulation of biological process	134		1.0287527141614627	GO:0045666		5.354967932428545
1306	21.0	486.0	21.0	392.0	28133.0		5.357142857142857	-5.2487975262933	1.0	M1	1.0	5.450723327305606	-7.969795820310332		GO Biological Processes	19.0		regulation of cell morphogenesis	3.1010802469135803	0.0	0.0	0.0	GO:0022604	25|226|387|1627|1742|3397|4076|6281|6498|9175|9798|10501|11178|22999|23025|23303|53335|55558|56882|120892|158866	0.0	4.0	ABL1|ALDOA|RHOA|DBN1|DLG4|ID1|CAPRIN1|S100A10|SKIL|MAP3K13|IST1|SEMA6B|LZTS1|RIMS1|UNC13A|KIF13B|BCL11A|PLXNA3|CDC42SE1|LRRK2|ZDHHC15	135		-3.102079920384211	-5.2487975262933	19_GO:0032502 developmental process	135		1.1372802614876918	GO:0022604		5.554168484974979
1307	27.0	712.0	27.0	392.0	28133.0		6.887755102040816	-5.506375019453922	1.0	M1	1.0	5.450723327305606	-7.969795820310332		GO Biological Processes	19.0		regulation of cell projection organization	2.7215339085072228	0.0	0.0	0.0	GO:0031344	25|207|387|1627|1742|2904|3397|4076|6324|6453|6498|9175|9798|10178|10300|10501|11178|22999|23025|23303|29116|29956|53335|55558|55845|120892|158866	0.0	4.0	ABL1|AKT1|RHOA|DBN1|DLG4|GRIN2B|ID1|CAPRIN1|SCN1B|ITSN1|SKIL|MAP3K13|IST1|TENM1|KATNB1|SEMA6B|LZTS1|RIMS1|UNC13A|KIF13B|MYLIP|CERS2|BCL11A|PLXNA3|BRK1|LRRK2|ZDHHC15	136		-3.334296612282538	-5.506375019453922	19_GO:0071840 cellular component organization or biogenesis	136		1.2790844340522147	GO:0031344		5.5309052092190605
1308	27.0	703.0	27.0	392.0	28133.0		6.887755102040816	-5.608716845478261	1.0	M1	1.0	5.450723327305606	-7.969795820310332		GO Biological Processes	19.0		regulation of plasma membrane bounded cell projection organization	2.756375736638894	0.0	0.0	0.0	GO:0120035	25|207|387|1627|1742|2904|3397|4076|6324|6453|6498|9175|9798|10178|10300|10501|11178|22999|23025|23303|29116|29956|53335|55558|55845|120892|158866	0.0	4.0	ABL1|AKT1|RHOA|DBN1|DLG4|GRIN2B|ID1|CAPRIN1|SCN1B|ITSN1|SKIL|MAP3K13|IST1|TENM1|KATNB1|SEMA6B|LZTS1|RIMS1|UNC13A|KIF13B|MYLIP|CERS2|BCL11A|PLXNA3|BRK1|LRRK2|ZDHHC15	137		-3.4246143277480443	-5.608716845478261	19_GO:0071840 cellular component organization or biogenesis	137		1.2790844340522147	GO:0120035		5.606146845689988
1309	26.0	659.0	26.0	392.0	28133.0		6.63265306122449	-5.6317290270704765	1.0	M1	1.0	5.450723327305606	-7.969795820310332		GO Biological Processes	19.0		plasma membrane bounded cell projection morphogenesis	2.831508779536094	0.0	0.0	0.0	GO:0120039	25|387|473|1501|1627|1742|1944|2290|3397|4076|6324|6498|6585|9175|9798|10501|11178|22999|23025|23303|53335|55558|120892|123904|158866|219699	0.0	4.0	ABL1|RHOA|RERE|CTNND2|DBN1|DLG4|EFNA3|FOXG1|ID1|CAPRIN1|SCN1B|SKIL|SLIT1|MAP3K13|IST1|SEMA6B|LZTS1|RIMS1|UNC13A|KIF13B|BCL11A|PLXNA3|LRRK2|NRN1L|ZDHHC15|UNC5B	138		-3.443085532152387	-5.6317290270704765	19_GO:0032502 developmental process	138		1.2568924461356075	GO:0120039		5.655526567692301
1310	26.0	645.0	26.0	392.0	28133.0		6.63265306122449	-5.8017688954527085	1.0	M1	1.0	5.450723327305606	-7.969795820310332		GO Biological Processes	19.0		neuron projection morphogenesis	2.89296788482835	0.0	0.0	0.0	GO:0048812	25|387|473|1501|1627|1742|1944|2290|3397|4076|6324|6498|6585|9175|9798|10501|11178|22999|23025|23303|53335|55558|120892|123904|158866|219699	0.0	4.0	ABL1|RHOA|RERE|CTNND2|DBN1|DLG4|EFNA3|FOXG1|ID1|CAPRIN1|SCN1B|SKIL|SLIT1|MAP3K13|IST1|SEMA6B|LZTS1|RIMS1|UNC13A|KIF13B|BCL11A|PLXNA3|LRRK2|NRN1L|ZDHHC15|UNC5B	139		-3.592082797795041	-5.8017688954527085	19_GO:0032502 developmental process	139		1.2568924461356075	GO:0048812		5.781410594206349
1311	27.0	679.0	27.0	392.0	28133.0		6.887755102040816	-5.891535578511051	1.0	M1	1.0	5.450723327305606	-7.969795820310332		GO Biological Processes	19.0		cell part morphogenesis	2.8538028613507254	0.0	0.0	0.0	GO:0032990	25|387|473|1501|1627|1742|1944|2290|3397|4076|6324|6498|6585|9175|9798|10501|11178|11252|22999|23025|23303|53335|55558|120892|123904|158866|219699	0.0	4.0	ABL1|RHOA|RERE|CTNND2|DBN1|DLG4|EFNA3|FOXG1|ID1|CAPRIN1|SCN1B|SKIL|SLIT1|MAP3K13|IST1|SEMA6B|LZTS1|PACSIN2|RIMS1|UNC13A|KIF13B|BCL11A|PLXNA3|LRRK2|NRN1L|ZDHHC15|UNC5B	140		-3.6725094545992403	-5.891535578511051	19_GO:0032502 developmental process	140		1.2790844340522147	GO:0032990		5.8126999093231735
1312	27.0	663.0	27.0	392.0	28133.0		6.887755102040816	-6.08848537807207	1.0	M1	1.0	5.450723327305606	-7.969795820310332		GO Biological Processes	19.0		cell projection morphogenesis	2.922672915319974	0.0	0.0	0.0	GO:0048858	25|387|473|1501|1627|1742|1944|2290|3397|4076|6324|6498|6585|9175|9798|10501|11178|11252|22999|23025|23303|53335|55558|120892|123904|158866|219699	0.0	4.0	ABL1|RHOA|RERE|CTNND2|DBN1|DLG4|EFNA3|FOXG1|ID1|CAPRIN1|SCN1B|SKIL|SLIT1|MAP3K13|IST1|SEMA6B|LZTS1|PACSIN2|RIMS1|UNC13A|KIF13B|BCL11A|PLXNA3|LRRK2|NRN1L|ZDHHC15|UNC5B	141		-3.8566849661238307	-6.08848537807207	19_GO:0032502 developmental process	141		1.2790844340522147	GO:0048858		5.95545743022667
1313	24.0	497.0	24.0	392.0	28133.0		6.122448979591836	-6.779649251402386	1.0	M1	1.0	5.450723327305606	-7.969795820310332		GO Biological Processes	19.0		regulation of neuron projection development	3.465651049152055	0.0	0.0	0.0	GO:0010975	25|207|387|1627|1742|3397|4076|6324|6453|6498|9175|9798|10300|10501|11178|22999|23025|23303|29116|29956|53335|55558|120892|158866	0.0	4.0	ABL1|AKT1|RHOA|DBN1|DLG4|ID1|CAPRIN1|SCN1B|ITSN1|SKIL|MAP3K13|IST1|KATNB1|SEMA6B|LZTS1|RIMS1|UNC13A|KIF13B|MYLIP|CERS2|BCL11A|PLXNA3|LRRK2|ZDHHC15	142		-4.503529411405789	-6.779649251402386	19_GO:0032502 developmental process	142		1.2108781141279994	GO:0010975		6.5925661653640475
1314	7.0	90.0	7.0	392.0	28133.0		1.7857142857142858	-3.5724278492936623	1.0	M1	1.0	5.581944444444445	-8.207266599743216		GO Biological Processes	19.0		cellular response to hydrogen peroxide	5.581944444444445	0.0	0.0	0.0	GO:0070301	25|664|6188|10365|10399|11235|120892	0.0	3.0	ABL1|BNIP3|RPS3|KLF2|RACK1|PDCD10|LRRK2	143		-1.70348111840545	-3.5724278492936623	19_GO:0050896 response to stimulus	143		0.6688831939860661	GO:0070301		5.175366609977966
1315	9.0	140.0	9.0	392.0	28133.0		2.295918367346939	-3.798413876120648	1.0	M1	1.0	5.581944444444445	-8.207266599743216		GO Biological Processes	19.0		cellular response to antibiotic	4.613647959183674	0.0	0.0	0.0	GO:0071236	25|664|2230|3399|6188|10365|10399|11235|120892	0.0	3.0	ABL1|BNIP3|FDX1|ID3|RPS3|KLF2|RACK1|PDCD10|LRRK2	144		-1.8928270058546386	-3.798413876120648	19_GO:0050896 response to stimulus	144		0.756469706802007	GO:0071236		5.095272540330545
1316	9.0	135.0	9.0	392.0	28133.0		2.295918367346939	-3.9184796343843087	1.0	M1	1.0	5.581944444444445	-8.207266599743216		GO Biological Processes	19.0		response to hydrogen peroxide	4.78452380952381	0.0	0.0	0.0	GO:0042542	25|664|2876|3039|6188|10365|10399|11235|120892	0.0	3.0	ABL1|BNIP3|GPX1|HBA1|RPS3|KLF2|RACK1|PDCD10|LRRK2	145		-1.9832015629071198	-3.9184796343843087	19_GO:0050896 response to stimulus	145		0.756469706802007	GO:0042542		5.239585157388127
1317	15.0	312.0	15.0	392.0	28133.0		3.826530612244898	-4.4333437520385095	1.0	M1	1.0	5.581944444444445	-8.207266599743216		GO Biological Processes	19.0		response to antibiotic	3.4503777472527473	0.0	0.0	0.0	GO:0046677	25|551|664|2230|2876|2904|2950|3039|3399|6188|6191|10365|10399|11235|120892	0.0	3.0	ABL1|AVP|BNIP3|FDX1|GPX1|GRIN2B|GSTP1|HBA1|ID3|RPS3|RPS4X|KLF2|RACK1|PDCD10|LRRK2	146		-2.3904088871823803	-4.4333437520385095	19_GO:0050896 response to stimulus	146		0.9689184016869838	GO:0046677		5.173759661660607
1318	12.0	163.0	12.0	392.0	28133.0		3.061224489795918	-5.478303904369631	1.0	M1	1.0	5.581944444444445	-8.207266599743216		GO Biological Processes	19.0		cellular response to reactive oxygen species	5.283523225241017	0.0	0.0	0.0	GO:0034614	25|207|664|2353|5052|6188|10365|10399|11235|120892|133522|140823	0.0	3.0	ABL1|AKT1|BNIP3|FOS|PRDX1|RPS3|KLF2|RACK1|PDCD10|LRRK2|PPARGC1B|ROMO1	147		-3.3125232924110457	-5.478303904369631	19_GO:0050896 response to stimulus	147		0.8700682497312916	GO:0034614		6.519750505789767
1319	22.0	506.0	22.0	392.0	28133.0		5.612244897959184	-5.5144948022049105	1.0	M1	1.0	5.581944444444445	-8.207266599743216		GO Biological Processes	19.0		response to toxic substance	3.1203416149068324	0.0	0.0	0.0	GO:0009636	25|551|664|1066|2353|2876|2904|2936|2950|3039|4257|5052|5743|6188|6191|6324|10365|10399|10891|11235|51714|120892	0.0	3.0	ABL1|AVP|BNIP3|CES1|FOS|GPX1|GRIN2B|GSR|GSTP1|HBA1|MGST1|PRDX1|PTGS2|RPS3|RPS4X|SCN1B|KLF2|RACK1|PPARGC1A|PDCD10|SELENOT|LRRK2	148		-3.337433179836636	-5.5144948022049105	19_GO:0050896 response to stimulus	148		1.1624736084356109	GO:0009636		5.721323614418502
1320	16.0	245.0	16.0	392.0	28133.0		4.081632653061225	-6.3964447681122	1.0	M1	1.0	5.581944444444445	-8.207266599743216		GO Biological Processes	19.0		cellular response to toxic substance	4.686880466472304	0.0	0.0	0.0	GO:0097237	25|664|2876|2936|2950|3039|4257|5052|5743|6188|10365|10399|10891|11235|51714|120892	0.0	3.0	ABL1|BNIP3|GPX1|GSR|GSTP1|HBA1|MGST1|PRDX1|PTGS2|RPS3|KLF2|RACK1|PPARGC1A|PDCD10|SELENOT|LRRK2	149		-4.148129268098402	-6.3964447681122	19_GO:0050896 response to stimulus	149		0.9993665598252253	GO:0097237		6.889944069355177
1321	18.0	306.0	18.0	392.0	28133.0		4.591836734693878	-6.445998971518341	1.0	M1	1.0	5.581944444444445	-8.207266599743216		GO Biological Processes	19.0		cellular response to oxidative stress	4.221638655462185	0.0	0.0	0.0	GO:0034599	25|207|664|2353|2876|2936|2950|4257|5052|6188|10365|10399|10891|11235|51142|120892|133522|140823	0.0	3.0	ABL1|AKT1|BNIP3|FOS|GPX1|GSR|GSTP1|MGST1|PRDX1|RPS3|KLF2|RACK1|PPARGC1A|PDCD10|CHCHD2|LRRK2|PPARGC1B|ROMO1	150		-4.187464306322856	-6.445998971518341	19_GO:0050896 response to stimulus	150		1.0571654303469598	GO:0034599		6.735760372148023
1322	17.0	229.0	17.0	392.0	28133.0		4.336734693877551	-7.565674792986988	1.0	M1	1.0	5.581944444444445	-8.207266599743216		GO Biological Processes	19.0		response to reactive oxygen species	5.327744853399875	0.0	0.0	0.0	GO:0000302	25|207|347|664|2353|2876|2950|3039|5052|6188|10365|10399|10891|11235|120892|133522|140823	0.0	3.0	ABL1|AKT1|APOD|BNIP3|FOS|GPX1|GSTP1|HBA1|PRDX1|RPS3|KLF2|RACK1|PPARGC1A|PDCD10|LRRK2|PPARGC1B|ROMO1	151		-5.263674434010413	-7.565674792986988	19_GO:0050896 response to stimulus	151		1.0287527141614627	GO:0000302		7.816789912628365
1332	33.0	349.0	33.0	392.0	28133.0		8.418367346938776	-17.261848910091523	1.0	M1	1.0	17.941964285714285	-18.56806122632926		GO Biological Processes	19.0		purine nucleoside triphosphate metabolic process	6.786072451903397	0.0	0.0	0.0	GO:0009144	204|226|230|513|514|517|518|525|1337|1345|1347|1351|1537|2821|4508|4694|4698|4701|4705|4706|4708|4722|4724|4729|5210|9377|10632|10891|23479|26330|51142|84701|120892	0.0	1.0	AK2|ALDOA|ALDOC|ATP5F1D|ATP5F1E|ATP5MC2|ATP5MC3|ATP6V1B1|COX6A1|COX6C|COX7A2|COX8A|CYC1|GPI|ATP6|NDUFA1|NDUFA5|NDUFA7|NDUFA10|NDUFAB1|NDUFB2|NDUFS3|NDUFS4|NDUFV2|PFKFB4|COX5A|ATP5MG|PPARGC1A|ISCU|GAPDHS|CHCHD2|COX4I2|LRRK2	161		-13.90678509063439	-17.261848910091523	19_GO:0008152 metabolic process	161		1.402410302986663	GO:0009144		12.929492468673535
1333	25.0	178.0	25.0	392.0	28133.0		6.377551020408164	-17.271764593697377	1.0	M1	1.0	17.941964285714285	-18.56806122632926		GO Biological Processes	19.0		electron transport chain	10.07975521669342	0.0	0.0	0.0	GO:0022900	1337|1345|1347|1351|1537|2230|2936|4694|4698|4701|4705|4706|4708|4722|4724|4729|8560|9377|10891|23479|27294|51142|79689|79751|84701	0.0	1.0	COX6A1|COX6C|COX7A2|COX8A|CYC1|FDX1|GSR|NDUFA1|NDUFA5|NDUFA7|NDUFA10|NDUFAB1|NDUFB2|NDUFS3|NDUFS4|NDUFV2|DEGS1|COX5A|PPARGC1A|ISCU|DHDH|CHCHD2|STEAP4|SLC25A22|COX4I2	162		-13.90678509063439	-17.271764593697377	19_GO:0008152 metabolic process	162		1.234167017505837	GO:0022900		14.44563625443248
1334	22.0	125.0	22.0	392.0	28133.0		5.612244897959184	-17.426391196029623	1.0	M1	1.0	17.941964285714285	-18.56806122632926		Reactome Gene Sets	6.0		Respiratory electron transport, ATP synthesis by chemiosmotic coupling, and heat production by uncoupling proteins.	12.631142857142857	0.0	0.0	0.0	R-HSA-163200	513|514|517|518|1337|1345|1351|1537|4508|4694|4698|4701|4705|4706|4708|4722|4724|4729|9377|10632|79133|116228	0.0	1.0	ATP5F1D|ATP5F1E|ATP5MC2|ATP5MC3|COX6A1|COX6C|COX8A|CYC1|ATP6|NDUFA1|NDUFA5|NDUFA7|NDUFA10|NDUFAB1|NDUFB2|NDUFS3|NDUFS4|NDUFV2|COX5A|ATP5MG|NDUFAF5|COX20	163		-13.97057597270852	-17.426391196029623		163		1.1624736084356109	R-HSA-163200		15.49239741976746
1335	33.0	343.0	33.0	392.0	28133.0		8.418367346938776	-17.48990754958276	1.0	M1	1.0	17.941964285714285	-18.56806122632926		GO Biological Processes	19.0		purine ribonucleoside triphosphate metabolic process	6.9047792586422325	0.0	0.0	0.0	GO:0009205	204|226|230|513|514|517|518|525|1337|1345|1347|1351|1537|2821|4508|4694|4698|4701|4705|4706|4708|4722|4724|4729|5210|9377|10632|10891|23479|26330|51142|84701|120892	0.0	1.0	AK2|ALDOA|ALDOC|ATP5F1D|ATP5F1E|ATP5MC2|ATP5MC3|ATP6V1B1|COX6A1|COX6C|COX7A2|COX8A|CYC1|GPI|ATP6|NDUFA1|NDUFA5|NDUFA7|NDUFA10|NDUFAB1|NDUFB2|NDUFS3|NDUFS4|NDUFV2|PFKFB4|COX5A|ATP5MG|PPARGC1A|ISCU|GAPDHS|CHCHD2|COX4I2|LRRK2	164		-13.97610037928397	-17.48990754958276	19_GO:0008152 metabolic process	164		1.402410302986663	GO:0009205		13.079427507637059
1336	32.0	313.0	32.0	392.0	28133.0		8.16326530612245	-17.752525747081222	1.0	M1	1.0	17.941964285714285	-18.56806122632926		GO Biological Processes	19.0		ATP metabolic process	7.337288909173894	0.0	0.0	0.0	GO:0046034	204|226|230|513|514|517|518|525|1337|1345|1347|1351|1537|2821|4508|4694|4698|4701|4705|4706|4708|4722|4724|4729|5210|9377|10632|10891|23479|26330|51142|84701	0.0	1.0	AK2|ALDOA|ALDOC|ATP5F1D|ATP5F1E|ATP5MC2|ATP5MC3|ATP6V1B1|COX6A1|COX6C|COX7A2|COX8A|CYC1|GPI|ATP6|NDUFA1|NDUFA5|NDUFA7|NDUFA10|NDUFAB1|NDUFB2|NDUFS3|NDUFS4|NDUFV2|PFKFB4|COX5A|ATP5MG|PPARGC1A|ISCU|GAPDHS|CHCHD2|COX4I2	165		-14.171771787151819	-17.752525747081222	19_GO:0008152 metabolic process	165		1.382920259548854	GO:0046034		13.402301824642333
1337	40.0	512.0	40.0	392.0	28133.0		10.204081632653061	-17.877296550719016	1.0	M1	1.0	17.941964285714285	-18.56806122632926		GO Biological Processes	19.0		generation of precursor metabolites and energy	5.606863839285714	0.0	0.0	0.0	GO:0006091	207|226|230|513|514|517|518|551|664|1337|1345|1347|1351|1537|2230|2821|2936|4508|4694|4698|4701|4705|4706|4708|4722|4724|4729|5210|7306|8560|9377|10632|10891|23479|26330|27294|51142|79689|79751|84701	0.0	1.0	AKT1|ALDOA|ALDOC|ATP5F1D|ATP5F1E|ATP5MC2|ATP5MC3|AVP|BNIP3|COX6A1|COX6C|COX7A2|COX8A|CYC1|FDX1|GPI|GSR|ATP6|NDUFA1|NDUFA5|NDUFA7|NDUFA10|NDUFAB1|NDUFB2|NDUFS3|NDUFS4|NDUFV2|PFKFB4|TYRP1|DEGS1|COX5A|ATP5MG|PPARGC1A|ISCU|GAPDHS|DHDH|CHCHD2|STEAP4|SLC25A22|COX4I2	166		-14.217361344741988	-17.877296550719016	19_GO:0008152 metabolic process	166		1.528875871968151	GO:0006091		12.505554109270347
1338	28.0	222.0	28.0	392.0	28133.0		7.142857142857143	-18.009560202094686	1.0	M1	1.0	17.941964285714285	-18.56806122632926		KEGG Pathway	24.0		Huntington disease	9.051801801801803	0.0	0.0	0.0	hsa05016	513|514|517|518|1337|1345|1347|1351|1537|1742|2876|2904|4508|4694|4698|4701|4705|4706|4708|4722|4724|4729|5743|6667|7417|9377|10891|84701	0.0	1.0	ATP5F1D|ATP5F1E|ATP5MC2|ATP5MC3|COX6A1|COX6C|COX7A2|COX8A|CYC1|DLG4|GPX1|GRIN2B|ATP6|NDUFA1|NDUFA5|NDUFA7|NDUFA10|NDUFAB1|NDUFB2|NDUFS3|NDUFS4|NDUFV2|PTGS2|SP1|VDAC2|COX5A|PPARGC1A|COX4I2	167		-14.252714983109602	-18.009560202094686		167		1.3007702840797921	hsa05016		14.317399608365701
1339	23.0	133.0	23.0	392.0	28133.0		5.86734693877551	-18.014484059672178	1.0	M1	1.0	17.941964285714285	-18.56806122632926		KEGG Pathway	24.0		Oxidative phosphorylation	12.410982814178304	0.0	0.0	0.0	ko00190	513|514|517|518|525|1337|1345|1347|1351|1537|4508|4694|4698|4701|4705|4706|4708|4722|4724|4729|9377|10632|84701	0.0	1.0	ATP5F1D|ATP5F1E|ATP5MC2|ATP5MC3|ATP6V1B1|COX6A1|COX6C|COX7A2|COX8A|CYC1|ATP6|NDUFA1|NDUFA5|NDUFA7|NDUFA10|NDUFAB1|NDUFB2|NDUFS3|NDUFS4|NDUFV2|COX5A|ATP5MG|COX4I2	168		-14.252714983109602	-18.014484059672178		168		1.1869925701863226	ko00190		15.680219497587869
1340	24.0	148.0	24.0	392.0	28133.0		6.122448979591836	-18.09475693824449	1.0	M1	1.0	17.941964285714285	-18.56806122632926		GO Biological Processes	19.0		oxidative phosphorylation	11.638030888030887	0.0	0.0	0.0	GO:0006119	513|514|517|518|1337|1345|1347|1351|1537|4508|4694|4698|4701|4705|4706|4708|4722|4724|4729|9377|10632|23479|51142|84701	0.0	1.0	ATP5F1D|ATP5F1E|ATP5MC2|ATP5MC3|COX6A1|COX6C|COX7A2|COX8A|CYC1|ATP6|NDUFA1|NDUFA5|NDUFA7|NDUFA10|NDUFAB1|NDUFB2|NDUFS3|NDUFS4|NDUFV2|COX5A|ATP5MG|ISCU|CHCHD2|COX4I2	169		-14.252714983109602	-18.09475693824449	19_GO:0008152 metabolic process	169		1.2108781141279994	GO:0006119		15.424522584917023
