# Supplementary material for: A zebrafish screen reveals Renin-angiotensin system inhibitors as neuroprotective via mitochondrial restoration in dopamine neurons
Source: eLife journal article supplement (doi:10.7554/elife.69795), 2021-09-22
Supplement: fig5-data4 [file elife-69795-fig5-data4-v1.cys › CytoscapeSession-2021_03_12-09_32/tables/51-ColorByCluster/LOCAL_ATTRS-org.cytoscape.model.CyEdge-ColorByCluster+default+edge.cytable]

CyCSV-Version	1
SUID	BEND_MAP_ID	interaction	name	selected
java.lang.Long	java.lang.Long	java.lang.String	java.lang.String	java.lang.Boolean
	mutable
ColorByCluster default edge
230	3429354	Direct		false
231	3429369	Direct		false
232	3429370	Direct		false
233	3429372	Direct		false
234	3429373	Direct		false
235	3429374	Direct		false
236	3429375	Direct		false
237	3429376	Direct		false
238	3429377	Direct		false
239	3429378	Direct		false
240	3429379	Direct		false
241	3429380	Direct		false
242	3429381	Direct		false
243	3429382	Direct		false
244	3429383	Direct		false
245	3429384	Direct		false
246	3429385	Direct		false
247	3429386	Direct		false
248	3429387	Direct		false
249	3429389	Direct		false
250	3429390	Direct		false
251	3429391	Direct		false
252	3429392	Direct		false
253	3429355	Direct		false
254	3429408	Direct		false
255	3429356	Direct		false
256	3429393	Direct		false
257	3429426	Direct		false
258	3429357	Direct		false
259	3429371	Direct		false
260	3429394	Direct		false
261	3429416	Direct		false
262	3429428	Direct		false
263	3429429	Direct		false
264	3429430	Direct		false
265	3429431	Direct		false
266	3429432	Direct		false
267	3429433	Direct		false
268	3429434	Direct		false
269	3429435	Direct		false
270	3429358	Direct		false
271	3429395	Direct		false
272	3429417	Direct		false
273	3429437	Direct		false
274	3429440	Direct		false
275	3429441	Direct		false
276	3429442	Direct		false
277	3429444	Direct		false
278	3429359	Direct		false
279	3429396	Direct		false
280	3429418	Direct		false
281	3429436	Direct		false
282	3429446	Direct		false
283	3429447	Direct		false
284	3429449	Direct		false
285	3429450	Direct		false
286	3429451	Direct		false
287	3429452	Direct		false
288	3429360	Direct		false
289	3429397	Direct		false
290	3429419	Direct		false
291	3429458	Direct		false
292	3429467	Direct		false
293	3429361	Direct		false
294	3429398	Direct		false
295	3429420	Direct		false
296	3429438	Direct		false
297	3429454	Direct		false
298	3429470	Direct		false
299	3429471	Direct		false
300	3429473	Direct		false
301	3429362	Direct		false
302	3429399	Direct		false
303	3429421	Direct		false
304	3429439	Direct		false
305	3429448	Direct		false
306	3429455	Direct		false
307	3429469	Direct		false
308	3429476	Direct		false
309	3429477	Direct		false
310	3429478	Direct		false
311	3429479	Direct		false
312	3429480	Direct		false
313	3429482	Direct		false
314	3429492	Direct		false
315	3429503	Direct		false
316	3429505	Direct		false
317	3429506	Direct		false
318	3429507	Direct		false
319	3429483	Direct		false
320	3429493	Direct		false
321	3429502	Direct		false
322	3429514	Direct		false
323	3429515	Direct		false
324	3429516	Direct		false
325	3429517	Direct		false
326	3429518	Direct		false
327	3429519	Direct		false
328	3429520	Direct		false
329	3429521	Direct		false
330	3429522	Direct		false
331	3429523	Direct		false
332	3429494	Direct		false
333	3429485	Direct		false
334	3429495	Direct		false
335	3429504	Direct		false
336	3429524	Direct		false
337	3429531	Direct		false
338	3429532	Direct		false
339	3429533	Direct		false
340	3429534	Direct		false
341	3429496	Direct		false
342	3429525	Direct		false
343	3429487	Direct		false
344	3429497	Direct		false
345	3429526	Direct		false
346	3429536	Direct		false
347	3429488	Direct		false
348	3429498	Direct		false
349	3429527	Direct		false
350	3429537	Direct		false
351	3429539	Direct		false
352	3429489	Direct		false
353	3429499	Direct		false
354	3429508	Direct		false
355	3429528	Direct		false
356	3429538	Direct		false
357	3429540	Direct		false
358	3429545	Direct		false
359	3429548	Direct		false
360	3429588	Direct		false
361	3429589	Direct		false
362	3429590	Direct		false
363	3429591	Direct		false
364	3429592	Direct		false
365	3429593	Direct		false
366	3429594	Direct		false
367	3429595	Direct		false
368	3429680	Direct		false
369	3429682	Direct		false
370	3429683	Direct		false
371	3429684	Direct		false
372	3429685	Direct		false
373	3429686	Direct		false
374	3429687	Direct		false
375	3429688	Direct		false
376	3429689	Direct		false
377	3429690	Direct		false
378	3429691	Direct		false
379	3429692	Direct		false
380	3429716	Direct		false
381	3429718	Direct		false
382	3429719	Direct		false
383	3429722	Direct		false
384	3429723	Direct		false
385	3429724	Direct		false
386	3429681	Direct		false
387	3429712	Direct		false
388	3429862	Direct		false
389	3429863	Direct		false
390	3429864	Direct		false
391	3429865	Direct		false
392	3429866	Direct		false
393	3429867	Direct		false
394	3429868	Direct		false
395	3429869	Direct		false
396	3429870	Direct		false
397	3429713	Direct		false
398	3429883	Direct		false
399	3429884	Direct		false
400	3429885	Direct		false
401	3429886	Direct		false
402	3429715	Direct		false
403	3430049	Direct		false
404	3430050	Direct		false
405	3429717	Direct		false
406	3430048	Direct		false
407	3430123	Direct		false
408	3430124	Direct		false
409	3430125	Direct		false
410	3430126	Direct		false
411	3429720	Direct		false
412	3429721	Direct		false
413	3430139	Direct		false
414	3429566	Direct		false
415	3429628	Direct		false
416	3429649	Direct		false
417	3429651	Direct		false
418	3429652	Direct		false
419	3429653	Direct		false
420	3429654	Direct		false
421	3429655	Direct		false
422	3429656	Direct		false
423	3429657	Direct		false
424	3429658	Direct		false
425	3429659	Direct		false
426	3429660	Direct		false
427	3429661	Direct		false
428	3429662	Direct		false
429	3429663	Direct		false
430	3429664	Direct		false
431	3429665	Direct		false
432	3429666	Direct		false
433	3429667	Direct		false
434	3429668	Direct		false
435	3429750	Direct		false
436	3429751	Direct		false
437	3429756	Direct		false
438	3429758	Direct		false
439	3429570	Direct		false
440	3429747	Direct		false
441	3429771	Direct		false
442	3429772	Direct		false
443	3429773	Direct		false
444	3429776	Direct		false
445	3429777	Direct		false
446	3429778	Direct		false
447	3429779	Direct		false
448	3429780	Direct		false
449	3429749	Direct		false
450	3429799	Direct		false
451	3429800	Direct		false
452	3429805	Direct		false
453	3429807	Direct		false
454	3429838	Direct		false
455	3429575	Direct		false
456	3429671	Direct		false
457	3429752	Direct		false
458	3429774	Direct		false
459	3429801	Direct		false
460	3429839	Direct		false
461	3429849	Direct		false
462	3429872	Direct		false
463	3429873	Direct		false
464	3429874	Direct		false
465	3429875	Direct		false
466	3429876	Direct		false
467	3429877	Direct		false
468	3429878	Direct		false
469	3429880	Direct		false
470	3429882	Direct		false
471	3429576	Direct		false
472	3429753	Direct		false
473	3429775	Direct		false
474	3429802	Direct		false
475	3429840	Direct		false
476	3429850	Direct		false
477	3429871	Direct		false
478	3429912	Direct		false
479	3429913	Direct		false
480	3429914	Direct		false
481	3429915	Direct		false
482	3429916	Direct		false
483	3429918	Direct		false
484	3429755	Direct		false
485	3429804	Direct		false
486	3429842	Direct		false
487	3429852	Direct		false
488	3429990	Direct		false
489	3429364	Direct		false
490	3429401	Direct		false
491	3429423	Direct		false
492	3429457	Direct		false
493	3429600	Direct		false
494	3429613	Direct		false
495	3429614	Direct		false
496	3429616	Direct		false
497	3429618	Direct		false
498	3429620	Direct		false
499	3429624	Direct		false
500	3429402	Direct		false
501	3429601	Direct		false
502	3429403	Direct		false
503	3429459	Direct		false
504	3429602	Direct		false
505	3429615	Direct		false
506	3429642	Direct		false
507	3429727	Direct		false
508	3429366	Direct		false
509	3429405	Direct		false
510	3429425	Direct		false
511	3429443	Direct		false
512	3429460	Direct		false
513	3429598	Direct		false
514	3429617	Direct		false
515	3429643	Direct		false
516	3429726	Direct		false
517	3429732	Direct		false
518	3429738	Direct		false
519	3429740	Direct		false
520	3429741	Direct		false
521	3429742	Direct		false
522	3429743	Direct		false
523	3429745	Direct		false
524	3429406	Direct		false
525	3429461	Direct		false
526	3429603	Direct		false
527	3429644	Direct		false
528	3429407	Direct		false
529	3429462	Direct		false
530	3429604	Direct		false
531	3429619	Direct		false
532	3429645	Direct		false
533	3429728	Direct		false
534	3429739	Direct		false
535	3429762	Direct		false
536	3429766	Direct		false
537	3429767	Direct		false
538	3429768	Direct		false
539	3429409	Direct		false
540	3429463	Direct		false
541	3429605	Direct		false
542	3429621	Direct		false
543	3429646	Direct		false
544	3429729	Direct		false
545	3429763	Direct		false
546	3429811	Direct		false
547	3429410	Direct		false
548	3429464	Direct		false
549	3429606	Direct		false
550	3429622	Direct		false
551	3429647	Direct		false
552	3429730	Direct		false
553	3429764	Direct		false
554	3429445	Direct		false
555	3429453	Direct		false
556	3429466	Direct		false
557	3429608	Direct		false
558	3429623	Direct		false
559	3429648	Direct		false
560	3429731	Direct		false
561	3429765	Direct		false
562	3429812	Direct		false
563	3429813	Direct		false
564	3429823	Direct		false
565	3429824	Direct		false
566	3429825	Direct		false
567	3429826	Direct		false
568	3429827	Direct		false
569	3429828	Direct		false
570	3429829	Direct		false
571	3429830	Direct		false
572	3429905	Direct		false
573	3429906	Direct		false
574	3429907	Direct		false
575	3429908	Direct		false
576	3429909	Direct		false
577	3429910	Direct		false
578	3429911	Direct		false
579	3429998	Direct		false
580	3429999	Direct		false
581	3430000	Direct		false
582	3430001	Direct		false
583	3430002	Direct		false
584	3430003	Direct		false
585	3430102	Direct		false
586	3430103	Direct		false
587	3430104	Direct		false
588	3430106	Direct		false
589	3430114	Direct		false
590	3430115	Direct		false
591	3430119	Direct		false
592	3430105	Direct		false
593	3430116	Direct		false
594	3430120	Direct		false
595	3430140	Direct		false
596	3430152	Direct		false
597	3430117	Direct		false
598	3430121	Direct		false
599	3430141	Direct		false
600	3429568	Direct		false
601	3429629	Direct		false
602	3429650	Direct		false
603	3429693	Direct		false
604	3429694	Direct		false
605	3429695	Direct		false
606	3429696	Direct		false
607	3429697	Direct		false
608	3429698	Direct		false
609	3429699	Direct		false
610	3429700	Direct		false
611	3429701	Direct		false
612	3429702	Direct		false
613	3429703	Direct		false
614	3429704	Direct		false
615	3429577	Direct		false
616	3429754	Direct		false
617	3429803	Direct		false
618	3429841	Direct		false
619	3429851	Direct		false
620	3429987	Direct		false
621	3429988	Direct		false
622	3429985	Direct		false
623	3429989	Direct		false
624	3430108	Direct		false
625	3429986	Direct		false
626	3430172	Direct		false
627	3430198	Direct		false
628	3429843	Direct		false
629	3429853	Direct		false
630	3430072	Direct		false
631	3430076	Direct		false
632	3430083	Direct		false
633	3429674	Direct		false
634	3429757	Direct		false
635	3429806	Direct		false
636	3429844	Direct		false
637	3429855	Direct		false
638	3430073	Direct		false
639	3430084	Direct		false
640	3430144	Direct		false
641	3430145	Direct		false
642	3430151	Direct		false
643	3429675	Direct		false
644	3429845	Direct		false
645	3429856	Direct		false
646	3430075	Direct		false
647	3430086	Direct		false
648	3430197	Direct		false
649	3430205	Direct		false
650	3429583	Direct		false
651	3429676	Direct		false
652	3429857	Direct		false
653	3430077	Direct		false
654	3430146	Direct		false
655	3430199	Direct		false
656	3429584	Direct		false
657	3430078	Direct		false
658	3430087	Direct		false
659	3430147	Direct		false
660	3430200	Direct		false
661	3430229	Direct		false
662	3430230	Direct		false
663	3429585	Direct		false
664	3429677	Direct		false
665	3429759	Direct		false
666	3429781	Direct		false
667	3429808	Direct		false
668	3429846	Direct		false
669	3429858	Direct		false
670	3429879	Direct		false
671	3429917	Direct		false
672	3429940	Direct		false
673	3430014	Direct		false
674	3430079	Direct		false
675	3430148	Direct		false
676	3430173	Direct		false
677	3430177	Direct		false
678	3430184	Direct		false
679	3430201	Direct		false
680	3430216	Direct		false
681	3430234	Direct		false
682	3430236	Direct		false
683	3429586	Direct		false
684	3429678	Direct		false
685	3429760	Direct		false
686	3429782	Direct		false
687	3429809	Direct		false
688	3429847	Direct		false
689	3429859	Direct		false
690	3430015	Direct		false
691	3430080	Direct		false
692	3430149	Direct		false
693	3430178	Direct		false
694	3430202	Direct		false
695	3430217	Direct		false
696	3430238	Direct		false
697	3429587	Direct		false
698	3429669	Direct		false
699	3429679	Direct		false
700	3429761	Direct		false
701	3429783	Direct		false
702	3429810	Direct		false
703	3429848	Direct		false
704	3429860	Direct		false
705	3429881	Direct		false
706	3429919	Direct		false
707	3430081	Direct		false
708	3430088	Direct		false
709	3430150	Direct		false
710	3430203	Direct		false
711	3430209	Direct		false
712	3430215	Direct		false
713	3430218	Direct		false
714	3430235	Direct		false
715	3430237	Direct		false
716	3430251	Direct		false
717	3429365	Direct		false
718	3429404	Direct		false
719	3429424	Direct		false
720	3429733	Direct		false
721	3429367	Direct		false
722	3429707	Direct		false
723	3429902	Direct		false
724	3429412	Direct		false
725	3429734	Direct		false
726	3429794	Direct		false
727	3429944	Direct		false
728	3429413	Direct		false
729	3429474	Direct		false
730	3429625	Direct		false
731	3429709	Direct		false
732	3429735	Direct		false
733	3429744	Direct		false
734	3429795	Direct		false
735	3429903	Direct		false
736	3429942	Direct		false
737	3429946	Direct		false
738	3429947	Direct		false
739	3429948	Direct		false
740	3429414	Direct		false
741	3429475	Direct		false
742	3429626	Direct		false
743	3429710	Direct		false
744	3429736	Direct		false
745	3429796	Direct		false
746	3429904	Direct		false
747	3429943	Direct		false
748	3429949	Direct		false
749	3429797	Direct		false
750	3429368	Direct		false
751	3429415	Direct		false
752	3429427	Direct		false
753	3429468	Direct		false
754	3429627	Direct		false
755	3429711	Direct		false
756	3429737	Direct		false
757	3429746	Direct		false
758	3429798	Direct		false
759	3429945	Direct		false
760	3429950	Direct		false
761	3430107	Direct		false
762	3429935	Direct		false
763	3429936	Direct		false
764	3429939	Direct		false
765	3429941	Direct		false
766	3430010	Direct		false
767	3430179	Direct		false
768	3429791	Direct		false
769	3429937	Direct		false
770	3430011	Direct		false
771	3430174	Direct		false
772	3430183	Direct		false
773	3430185	Direct		false
774	3430186	Direct		false
775	3429792	Direct		false
776	3429922	Direct		false
777	3429938	Direct		false
778	3429960	Direct		false
779	3430012	Direct		false
780	3430074	Direct		false
781	3430085	Direct		false
782	3430143	Direct		false
783	3430175	Direct		false
784	3430182	Direct		false
785	3430187	Direct		false
786	3430188	Direct		false
787	3430189	Direct		false
788	3430190	Direct		false
789	3430191	Direct		false
790	3430013	Direct		false
791	3430162	Direct		false
792	3430176	Direct		false
793	3430210	Direct		false
794	3430211	Direct		false
795	3430016	Direct		false
796	3429491	Direct		false
797	3429501	Direct		false
798	3429510	Direct		false
799	3429530	Direct		false
800	3429535	Direct		false
801	3429542	Direct		false
802	3429546	Direct		false
803	3429814	Direct		false
804	3429890	Direct		false
805	3429891	Direct		false
806	3429892	Direct		false
807	3429511	Direct		false
808	3429543	Direct		false
809	3429815	Direct		false
810	3429888	Direct		false
811	3430109	Direct		false
812	3430110	Direct		false
813	3430111	Direct		false
814	3430113	Direct		false
815	3429512	Direct		false
816	3429544	Direct		false
817	3429816	Direct		false
818	3429889	Direct		false
819	3430192	Direct		false
820	3430193	Direct		false
821	3430195	Direct		false
822	3429818	Direct		false
823	3430206	Direct		false
824	3430245	Direct		false
825	3430112	Direct		false
826	3430194	Direct		false
827	3430207	Direct		false
828	3430244	Direct		false
829	3430285	Direct		false
830	3429513	Direct		false
831	3429547	Direct		false
832	3429819	Direct		false
833	3430208	Direct		false
834	3429820	Direct		false
835	3430180	Direct		false
836	3430181	Direct		false
837	3429821	Direct		false
838	3430196	Direct		false
839	3429831	Direct		false
840	3429972	Direct		false
841	3429973	Direct		false
842	3429974	Direct		false
843	3429975	Direct		false
844	3429976	Direct		false
845	3429832	Direct		false
846	3429971	Direct		false
847	3430059	Direct		false
848	3430060	Direct		false
849	3430061	Direct		false
850	3430062	Direct		false
851	3430063	Direct		false
852	3430065	Direct		false
853	3430090	Direct		false
854	3430066	Direct		false
855	3430089	Direct		false
856	3430153	Direct		false
857	3430154	Direct		false
858	3430067	Direct		false
859	3430068	Direct		false
860	3430091	Direct		false
861	3430171	Direct		false
862	3429893	Direct		false
863	3430038	Direct		false
864	3430155	Direct		false
865	3430222	Direct		false
866	3430224	Direct		false
867	3430225	Direct		false
868	3430228	Direct		false
869	3429894	Direct		false
870	3430221	Direct		false
871	3430252	Direct		false
872	3430254	Direct		false
873	3430257	Direct		false
874	3429895	Direct		false
875	3429887	Direct		false
876	3429896	Direct		false
877	3430118	Direct		false
878	3430122	Direct		false
879	3430142	Direct		false
880	3430223	Direct		false
881	3430253	Direct		false
882	3430258	Direct		false
883	3430263	Direct		false
884	3430264	Direct		false
885	3430267	Direct		false
886	3429897	Direct		false
887	3430259	Direct		false
888	3429898	Direct		false
889	3430272	Direct		false
890	3429899	Direct		false
891	3430082	Direct		false
892	3430204	Direct		false
893	3430226	Direct		false
894	3430250	Direct		false
895	3430255	Direct		false
896	3430260	Direct		false
897	3430265	Direct		false
898	3430268	Direct		false
899	3430276	Direct		false
900	3430277	Direct		false
901	3429563	Direct		false
902	3429900	Direct		false
903	3430227	Direct		false
904	3430256	Direct		false
905	3430261	Direct		false
906	3430266	Direct		false
907	3430269	Direct		false
908	3430271	Direct		false
909	3430281	Direct		false
910	3429901	Direct		false
911	3430262	Direct		false
912	3430270	Direct		false
913	3429920	Direct		false
914	3429921	Direct		false
915	3429959	Direct		false
916	3430163	Direct		false
917	3430164	Direct		false
918	3430165	Direct		false
919	3430166	Direct		false
920	3429923	Direct		false
921	3429961	Direct		false
922	3430239	Direct		false
923	3430240	Direct		false
924	3430241	Direct		false
925	3430278	Direct		false
926	3430279	Direct		false
927	3430280	Direct		false
928	3429714	Direct		false
929	3429924	Direct		false
930	3430017	Direct		false
931	3430018	Direct		false
932	3430019	Direct		false
933	3430020	Direct		false
934	3430021	Direct		false
935	3430022	Direct		false
936	3430057	Direct		false
937	3429925	Direct		false
938	3430053	Direct		false
939	3430127	Direct		false
940	3430128	Direct		false
941	3430131	Direct		false
942	3429926	Direct		false
943	3430054	Direct		false
944	3430137	Direct		false
945	3429927	Direct		false
946	3430055	Direct		false
947	3430135	Direct		false
948	3430169	Direct		false
949	3429928	Direct		false
950	3430056	Direct		false
951	3430129	Direct		false
952	3430136	Direct		false
953	3430167	Direct		false
954	3430213	Direct		false
955	3429929	Direct		false
956	3430130	Direct		false
957	3430168	Direct		false
958	3430212	Direct		false
959	3430220	Direct		false
960	3430242	Direct		false
961	3430243	Direct		false
962	3429725	Direct		false
963	3430023	Direct		false
964	3430058	Direct		false
965	3430132	Direct		false
966	3430138	Direct		false
967	3430170	Direct		false
968	3430214	Direct		false
969	3429932	Direct		false
970	3430069	Direct		false
971	3429933	Direct		false
972	3430070	Direct		false
973	3430133	Direct		false
974	3430219	Direct		false
975	3429934	Direct		false
976	3430071	Direct		false
977	3430134	Direct		false
978	3430034	Direct		false
979	3430035	Direct		false
980	3430036	Direct		false
981	3429854	Direct		false
982	3430033	Direct		false
983	3430092	Direct		false
984	3430093	Direct		false
985	3430094	Direct		false
986	3430095	Direct		false
987	3430098	Direct		false
988	3430037	Direct		false
989	3430039	Direct		false
990	3430096	Direct		false
991	3430156	Direct		false
992	3430231	Direct		false
993	3430232	Direct		false
994	3430233	Direct		false
995	3430040	Direct		false
996	3430097	Direct		false
997	3430157	Direct		false
998	3430246	Direct		false
999	3430248	Direct		false
1000	3430041	Direct		false
1001	3430158	Direct		false
1002	3430042	Direct		false
1003	3430099	Direct		false
1004	3430159	Direct		false
1005	3430247	Direct		false
1006	3430273	Direct		false
1007	3430282	Direct		false
1008	3429861	Direct		false
1009	3430043	Direct		false
1010	3430100	Direct		false
1011	3430160	Direct		false
1012	3430274	Direct		false
1013	3430044	Direct		false
1014	3430101	Direct		false
1015	3430161	Direct		false
1016	3430249	Direct		false
1017	3430275	Direct		false
1018	3430283	Direct		false
1019	3430284	Direct		false
1020	3429983	Direct		false
1021	3429977	Direct		false
1022	3429992	Direct		false
1023	3429993	Direct		false
1024	3429994	Direct		false
1025	3429995	Direct		false
1026	3429996	Direct		false
1027	3429997	Direct		false
1028	3429964	Direct		false
1029	3429978	Direct		false
1030	3429991	Direct		false
1031	3430004	Direct		false
1032	3430005	Direct		false
1033	3430006	Direct		false
1034	3430007	Direct		false
1035	3430008	Direct		false
1036	3430009	Direct		false
1037	3429979	Direct		false
1038	3430024	Direct		false
1039	3430025	Direct		false
1040	3430027	Direct		false
1041	3430028	Direct		false
1042	3429980	Direct		false
1043	3430031	Direct		false
1044	3430032	Direct		false
1045	3429981	Direct		false
1046	3430029	Direct		false
1047	3430046	Direct		false
1048	3430047	Direct		false
1049	3429982	Direct		false
1050	3430026	Direct		false
1051	3430030	Direct		false
1052	3430045	Direct		false
1053	3430051	Direct		false
1054	3430052	Direct		false
1055	3429984	Direct		false
1056	3430064	Direct		false
1057	3429607	Direct		false
1058	3429609	Direct		false
1059	3429610	Direct		false
1060	3429611	Direct		false
1061	3429612	Direct		false
1062	3429930	Direct		false
1063	3429388	Direct		false
1064	3429411	Direct		false
1065	3429465	Direct		false
1066	3429472	Direct		false
1067	3429822	Direct		false
1068	3429705	Direct		false
1069	3429706	Direct		false
1070	3429708	Direct		false
1071	3429481	Direct		false
1072	3429484	Direct		false
1073	3429486	Direct		false
1074	3429565	Direct		false
1075	3429630	Direct		false
1076	3429631	Direct		false
1077	3429632	Direct		false
1078	3429633	Direct		false
1079	3429634	Direct		false
1080	3429635	Direct		false
1081	3429636	Direct		false
1082	3429637	Direct		false
1083	3429638	Direct		false
1084	3429639	Direct		false
1085	3429640	Direct		false
1086	3429641	Direct		false
1087	3429571	Direct		false
1088	3429748	Direct		false
1089	3429770	Direct		false
1090	3429784	Direct		false
1091	3429785	Direct		false
1092	3429786	Direct		false
1093	3429787	Direct		false
1094	3429788	Direct		false
1095	3429789	Direct		false
1096	3429790	Direct		false
1097	3429793	Direct		false
1098	3429363	Direct		false
1099	3429400	Direct		false
1100	3429422	Direct		false
1101	3429456	Direct		false
1102	3429596	Direct		false
1103	3429597	Direct		false
1104	3429599	Direct		false
1105	3429962	Direct		false
1106	3429963	Direct		false
1107	3429965	Direct		false
1108	3429966	Direct		false
1109	3429967	Direct		false
1110	3429968	Direct		false
1111	3429969	Direct		false
1112	3429970	Direct		false
1113	3429670	Direct		false
1114	3429672	Direct		false
1115	3429673	Direct		false
1116	3429951	Direct		false
1117	3429952	Direct		false
1118	3429953	Direct		false
1119	3429954	Direct		false
1120	3429955	Direct		false
1121	3429956	Direct		false
1122	3429957	Direct		false
1123	3429958	Direct		false
1124	3429931	Direct		false
1125	3429567	Direct		false
1126	3429569	Direct		false
1127	3429572	Direct		false
1128	3429573	Direct		false
1129	3429574	Direct		false
1130	3429578	Direct		false
1131	3429579	Direct		false
1132	3429580	Direct		false
1133	3429581	Direct		false
1134	3429582	Direct		false
1135	3429769	Direct		false
1136	3429549	Direct		false
1137	3429550	Direct		false
1138	3429551	Direct		false
1139	3429552	Direct		false
1140	3429553	Direct		false
1141	3429554	Direct		false
1142	3429555	Direct		false
1143	3429556	Direct		false
1144	3429557	Direct		false
1145	3429558	Direct		false
1146	3429559	Direct		false
1147	3429560	Direct		false
1148	3429561	Direct		false
1149	3429562	Direct		false
1150	3429564	Direct		false
1151	3429490	Direct		false
1152	3429500	Direct		false
1153	3429509	Direct		false
1154	3429529	Direct		false
1155	3429541	Direct		false
1156	3429817	Direct		false
1157	3429833	Direct		false
1158	3429834	Direct		false
1159	3429835	Direct		false
1160	3429836	Direct		false
1161	3429837	Direct		false
