# Supplementary material for: A zebrafish screen reveals Renin-angiotensin system inhibitors as neuroprotective via mitochondrial restoration in dopamine neurons
Source: eLife journal article supplement (doi:10.7554/elife.69795), 2021-09-22
Supplement: fig5-data4 [file elife-69795-fig5-data4-v1.cys › CytoscapeSession-2021_03_12-09_32/tables/51-ColorByCluster/LOCAL_ATTRS-org.cytoscape.model.CyNetwork-ColorByCluster+default+network.cytable]

"CyCSV-Version","1"
"SUID","__Annotations","name","selected"
"java.lang.Long","java.util.List<java.lang.String>","java.lang.String","java.lang.Boolean"
"","mutable","",""
"ColorByCluster default network",""
"51","","ColorByCluster","false"
