# Supplementary material for: A zebrafish screen reveals Renin-angiotensin system inhibitors as neuroprotective via mitochondrial restoration in dopamine neurons
Source: eLife journal article supplement (doi:10.7554/elife.69795), 2021-09-22
Supplement: fig5-data4 [file elife-69795-fig5-data4-v1.cys › CytoscapeSession-2021_03_12-09_32/tables/51-ColorByCluster/LOCAL_ATTRS-org.cytoscape.model.CyNode-ColorByCluster+default+node.cytable]

CyCSV-Version	1
SUID	name	selected
java.lang.Long	java.lang.String	java.lang.Boolean
ColorByCluster default node
61	1	false
62	2	false
63	3	false
64	4	false
65	5	false
66	6	false
67	7	false
68	8	false
69	9	false
70	10	false
71	11	false
72	12	false
73	13	false
74	14	false
75	15	false
76	16	false
77	17	false
78	18	false
79	19	false
80	20	false
81	21	false
82	22	false
83	23	false
84	24	false
85	25	false
86	26	false
87	27	false
88	28	false
89	29	false
90	30	false
91	31	false
92	32	false
93	33	false
94	34	false
95	35	false
96	36	false
97	37	false
98	38	false
99	39	false
100	40	false
101	41	false
102	42	false
103	43	false
104	44	false
105	45	false
106	46	false
107	47	false
108	48	false
109	49	false
110	50	false
111	51	false
112	52	false
113	53	false
114	54	false
115	55	false
116	56	false
117	57	false
118	58	false
119	59	false
120	60	false
121	61	false
122	62	false
123	63	false
124	64	false
125	65	false
126	66	false
127	67	false
128	68	false
129	69	false
130	70	false
131	71	false
132	72	false
133	73	false
134	74	false
135	75	false
136	76	false
137	77	false
138	78	false
139	79	false
140	80	false
141	81	false
142	82	false
143	83	false
144	84	false
145	85	false
146	86	false
147	87	false
148	88	false
149	89	false
150	90	false
151	91	false
152	92	false
153	93	false
154	94	false
155	95	false
156	96	false
157	97	false
158	98	false
159	99	false
160	100	false
161	101	false
162	102	false
163	103	false
164	104	false
165	105	false
166	106	false
167	107	false
168	108	false
169	109	false
170	110	false
171	111	false
172	112	false
173	113	false
174	114	false
175	115	false
176	116	false
177	117	false
178	118	false
179	119	false
180	120	false
181	121	false
182	122	false
183	123	false
184	124	false
185	125	false
186	126	false
187	127	false
188	128	false
189	129	false
190	130	false
191	131	false
192	132	false
193	133	false
194	134	false
195	135	false
196	136	false
197	137	false
198	138	false
199	139	false
200	140	false
201	141	false
202	142	false
203	143	false
204	144	false
205	145	false
206	146	false
207	147	false
208	148	false
209	149	false
210	150	false
211	151	false
212	152	false
213	153	false
214	154	false
215	155	false
216	156	false
217	157	false
218	158	false
219	159	false
220	160	false
221	161	false
222	162	false
223	163	false
224	164	false
225	165	false
226	166	false
227	167	false
228	168	false
229	169	false
