# Supplementary material for: A zebrafish screen reveals Renin-angiotensin system inhibitors as neuroprotective via mitochondrial restoration in dopamine neurons
Source: eLife journal article supplement (doi:10.7554/elife.69795), 2021-09-22
Supplement: fig5-data4 [file elife-69795-fig5-data4-v1.cys › CytoscapeSession-2021_03_12-09_32/tables/1162-ColorByPValue/HIDDEN-org.cytoscape.model.CyNetwork-1162+hidden+network.cytable]

"CyCSV-Version","1"
"SUID"
"java.lang.Long"
""
"1162 hidden network",""
"1162"
