# Supplementary material for: A zebrafish screen reveals Renin-angiotensin system inhibitors as neuroprotective via mitochondrial restoration in dopamine neurons
Source: eLife journal article supplement (doi:10.7554/elife.69795), 2021-09-22
Supplement: fig5-data4 [file elife-69795-fig5-data4-v1.cys › CytoscapeSession-2021_03_12-09_32/tables/1162-ColorByPValue/LOCAL_ATTRS-org.cytoscape.model.CyEdge-ColorByPValue+default+edge.cytable]

CyCSV-Version	1
SUID	BEND_MAP_ID	interaction	name	selected
java.lang.Long	java.lang.Long	java.lang.String	java.lang.String	java.lang.Boolean
	mutable
ColorByPValue default edge
1352	3431578	Direct		false
1353	3431579	Direct		false
1354	3431580	Direct		false
1355	3431581	Direct		false
1356	3431582	Direct		false
1357	3431583	Direct		false
1358	3431584	Direct		false
1359	3431585	Direct		false
1360	3431586	Direct		false
1361	3431587	Direct		false
1362	3431588	Direct		false
1363	3431589	Direct		false
1364	3431590	Direct		false
1365	3431591	Direct		false
1366	3431592	Direct		false
1368	3431594	Direct		false
1369	3431595	Direct		false
1370	3431596	Direct		false
1371	3431597	Direct		false
1372	3431598	Direct		false
1373	3431599	Direct		false
1374	3431600	Direct		false
1375	3431601	Direct		false
1376	3431602	Direct		false
1377	3431603	Direct		false
1379	3431605	Direct		false
1380	3431606	Direct		false
1381	3431607	Direct		false
1382	3431608	Direct		false
1383	3431609	Direct		false
1384	3431610	Direct		false
1385	3431611	Direct		false
1386	3431612	Direct		false
1387	3431613	Direct		false
1388	3431614	Direct		false
1389	3431615	Direct		false
1398	3431624	Direct		false
1399	3431625	Direct		false
1400	3431626	Direct		false
1401	3431627	Direct		false
1402	3431628	Direct		false
1403	3431629	Direct		false
1404	3431630	Direct		false
1405	3431631	Direct		false
1406	3431632	Direct		false
1407	3431633	Direct		false
1408	3431634	Direct		false
1409	3431635	Direct		false
1410	3431636	Direct		false
1411	3431637	Direct		false
1412	3431638	Direct		false
1413	3431639	Direct		false
1414	3431640	Direct		false
1415	3431641	Direct		false
1416	3431642	Direct		false
1417	3431643	Direct		false
1418	3431644	Direct		false
1419	3431645	Direct		false
1420	3431646	Direct		false
1421	3431647	Direct		false
1422	3431648	Direct		false
1423	3431649	Direct		false
1424	3431650	Direct		false
1425	3431651	Direct		false
1426	3431652	Direct		false
1427	3431653	Direct		false
1428	3431654	Direct		false
1432	3431658	Direct		false
1433	3431659	Direct		false
1434	3431660	Direct		false
1435	3431661	Direct		false
1436	3431662	Direct		false
1437	3431663	Direct		false
1438	3431664	Direct		false
1439	3431665	Direct		false
1440	3431666	Direct		false
1441	3431667	Direct		false
1442	3431668	Direct		false
1443	3431669	Direct		false
1444	3431670	Direct		false
1445	3431671	Direct		false
1483	3431709	Direct		false
1484	3431710	Direct		false
1485	3431711	Direct		false
1486	3431712	Direct		false
1487	3431713	Direct		false
1488	3431714	Direct		false
1489	3431715	Direct		false
1490	3431716	Direct		false
1491	3431717	Direct		false
1492	3431718	Direct		false
1493	3431719	Direct		false
1494	3431720	Direct		false
1495	3431721	Direct		false
1496	3431722	Direct		false
1497	3431723	Direct		false
1498	3431724	Direct		false
1499	3431725	Direct		false
1500	3431726	Direct		false
1501	3431727	Direct		false
1502	3431728	Direct		false
1503	3431729	Direct		false
1504	3431730	Direct		false
1505	3431731	Direct		false
1506	3431732	Direct		false
1507	3431733	Direct		false
1508	3431734	Direct		false
1509	3431735	Direct		false
1510	3431736	Direct		false
1511	3431737	Direct		false
1512	3431738	Direct		false
1513	3431739	Direct		false
1514	3431740	Direct		false
1515	3431741	Direct		false
1516	3431742	Direct		false
1517	3431743	Direct		false
1518	3431744	Direct		false
1519	3431745	Direct		false
1520	3431746	Direct		false
1521	3431747	Direct		false
1522	3431748	Direct		false
1523	3431749	Direct		false
1524	3431750	Direct		false
1534	3431760	Direct		false
1535	3431761	Direct		false
1536	3431762	Direct		false
1537	3431763	Direct		false
1538	3431764	Direct		false
1539	3431765	Direct		false
1540	3431766	Direct		false
1541	3431767	Direct		false
1542	3431768	Direct		false
1543	3431769	Direct		false
1544	3431770	Direct		false
1545	3431771	Direct		false
1546	3431772	Direct		false
1547	3431773	Direct		false
1548	3431774	Direct		false
1549	3431775	Direct		false
1550	3431776	Direct		false
1551	3431777	Direct		false
1552	3431778	Direct		false
1553	3431779	Direct		false
1554	3431780	Direct		false
1555	3431781	Direct		false
1556	3431782	Direct		false
1557	3431783	Direct		false
1558	3431784	Direct		false
1559	3431785	Direct		false
1560	3431786	Direct		false
1561	3431787	Direct		false
1562	3431788	Direct		false
1563	3431789	Direct		false
1564	3431790	Direct		false
1565	3431791	Direct		false
1566	3431792	Direct		false
1567	3431793	Direct		false
1568	3431794	Direct		false
1569	3431795	Direct		false
1570	3431796	Direct		false
1571	3431797	Direct		false
1572	3431798	Direct		false
1573	3431799	Direct		false
1574	3431800	Direct		false
1575	3431801	Direct		false
1576	3431802	Direct		false
1577	3431803	Direct		false
1578	3431804	Direct		false
1579	3431805	Direct		false
1580	3431806	Direct		false
1581	3431807	Direct		false
1582	3431808	Direct		false
1583	3431809	Direct		false
1584	3431810	Direct		false
1585	3431811	Direct		false
1586	3431812	Direct		false
1587	3431813	Direct		false
1588	3431814	Direct		false
1589	3431815	Direct		false
1590	3431816	Direct		false
1591	3431817	Direct		false
1592	3431818	Direct		false
1593	3431819	Direct		false
1594	3431820	Direct		false
1595	3431821	Direct		false
1596	3431822	Direct		false
1597	3431823	Direct		false
1598	3431824	Direct		false
1599	3431825	Direct		false
1600	3431826	Direct		false
1601	3431827	Direct		false
1602	3431828	Direct		false
1603	3431829	Direct		false
1604	3431830	Direct		false
1605	3431831	Direct		false
1606	3431832	Direct		false
1607	3431833	Direct		false
1608	3431834	Direct		false
1609	3431835	Direct		false
1610	3431836	Direct		false
1611	3431837	Direct		false
1612	3431838	Direct		false
1613	3431839	Direct		false
1614	3431840	Direct		false
1615	3431841	Direct		false
1616	3431842	Direct		false
1617	3431843	Direct		false
1618	3431844	Direct		false
1619	3431845	Direct		false
1620	3431846	Direct		false
1621	3431847	Direct		false
1622	3431848	Direct		false
1623	3431849	Direct		false
1624	3431850	Direct		false
1625	3431851	Direct		false
1626	3431852	Direct		false
1627	3431853	Direct		false
1628	3431854	Direct		false
1629	3431855	Direct		false
1630	3431856	Direct		false
1631	3431857	Direct		false
1632	3431858	Direct		false
1633	3431859	Direct		false
1634	3431860	Direct		false
1635	3431861	Direct		false
1636	3431862	Direct		false
1637	3431863	Direct		false
1638	3431864	Direct		false
1639	3431865	Direct		false
1640	3431866	Direct		false
1664	3431890	Direct		false
1665	3431891	Direct		false
1666	3431892	Direct		false
1667	3431893	Direct		false
1668	3431894	Direct		false
1707	3431933	Direct		false
1708	3431934	Direct		false
1709	3431935	Direct		false
1710	3431936	Direct		false
1711	3431937	Direct		false
1712	3431938	Direct		false
1713	3431939	Direct		false
1714	3431940	Direct		false
1715	3431941	Direct		false
1716	3431942	Direct		false
1717	3431943	Direct		false
1718	3431944	Direct		false
1719	3431945	Direct		false
1720	3431946	Direct		false
1721	3431947	Direct		false
1722	3431948	Direct		false
1723	3431949	Direct		false
1724	3431950	Direct		false
1725	3431951	Direct		false
1726	3431952	Direct		false
1727	3431953	Direct		false
1728	3431954	Direct		false
1729	3431955	Direct		false
1730	3431956	Direct		false
1731	3431957	Direct		false
1732	3431958	Direct		false
1733	3431959	Direct		false
1734	3431960	Direct		false
1735	3431961	Direct		false
1736	3431962	Direct		false
1737	3431963	Direct		false
1738	3431964	Direct		false
1739	3431965	Direct		false
1740	3431966	Direct		false
1741	3431967	Direct		false
1742	3431968	Direct		false
1743	3431969	Direct		false
1744	3431970	Direct		false
1745	3431971	Direct		false
1746	3431972	Direct		false
1747	3431973	Direct		false
1748	3431974	Direct		false
1749	3431975	Direct		false
1750	3431976	Direct		false
1751	3431977	Direct		false
1752	3431978	Direct		false
1753	3431979	Direct		false
1754	3431980	Direct		false
1755	3431981	Direct		false
1756	3431982	Direct		false
1757	3431983	Direct		false
1758	3431984	Direct		false
1759	3431985	Direct		false
1760	3431986	Direct		false
1761	3431987	Direct		false
1762	3431988	Direct		false
1763	3431989	Direct		false
1764	3431990	Direct		false
1765	3431991	Direct		false
1766	3431992	Direct		false
1767	3431993	Direct		false
1768	3431994	Direct		false
1769	3431995	Direct		false
1770	3431996	Direct		false
1771	3431997	Direct		false
1772	3431998	Direct		false
1773	3431999	Direct		false
1774	3432000	Direct		false
1775	3432001	Direct		false
1776	3432002	Direct		false
1777	3432003	Direct		false
1778	3432004	Direct		false
1779	3432005	Direct		false
1780	3432006	Direct		false
1781	3432007	Direct		false
1782	3432008	Direct		false
1783	3432009	Direct		false
1784	3432010	Direct		false
1785	3432011	Direct		false
1786	3432012	Direct		false
1787	3432013	Direct		false
1788	3432014	Direct		false
1789	3432015	Direct		false
1790	3432016	Direct		false
1791	3432017	Direct		false
1792	3432018	Direct		false
1793	3432019	Direct		false
1794	3432020	Direct		false
1795	3432021	Direct		false
1796	3432022	Direct		false
1797	3432023	Direct		false
1798	3432024	Direct		false
1799	3432025	Direct		false
1800	3432026	Direct		false
1801	3432027	Direct		false
1802	3432028	Direct		false
1803	3432029	Direct		false
1804	3432030	Direct		false
1805	3432031	Direct		false
1806	3432032	Direct		false
1807	3432033	Direct		false
1808	3432034	Direct		false
1809	3432035	Direct		false
1810	3432036	Direct		false
1811	3432037	Direct		false
1812	3432038	Direct		false
1813	3432039	Direct		false
1814	3432040	Direct		false
1815	3432041	Direct		false
1816	3432042	Direct		false
1817	3432043	Direct		false
1818	3432044	Direct		false
1819	3432045	Direct		false
1820	3432046	Direct		false
1821	3432047	Direct		false
1822	3432048	Direct		false
1823	3432049	Direct		false
1824	3432050	Direct		false
1825	3432051	Direct		false
1826	3432052	Direct		false
1827	3432053	Direct		false
1828	3432054	Direct		false
1829	3432055	Direct		false
1830	3432056	Direct		false
1831	3432057	Direct		false
1832	3432058	Direct		false
1833	3432059	Direct		false
1834	3432060	Direct		false
1835	3432061	Direct		false
1836	3432062	Direct		false
1837	3432063	Direct		false
1838	3432064	Direct		false
1839	3432065	Direct		false
1840	3432066	Direct		false
1841	3432067	Direct		false
1842	3432068	Direct		false
1843	3432069	Direct		false
1844	3432070	Direct		false
1845	3432071	Direct		false
1846	3432072	Direct		false
1847	3432073	Direct		false
1848	3432074	Direct		false
1849	3432075	Direct		false
1850	3432076	Direct		false
1851	3432077	Direct		false
1852	3432078	Direct		false
1853	3432079	Direct		false
1854	3432080	Direct		false
1855	3432081	Direct		false
1856	3432082	Direct		false
1857	3432083	Direct		false
1858	3432084	Direct		false
1859	3432085	Direct		false
1860	3432086	Direct		false
1861	3432087	Direct		false
1862	3432088	Direct		false
1863	3432089	Direct		false
1864	3432090	Direct		false
1865	3432091	Direct		false
1866	3432092	Direct		false
1867	3432093	Direct		false
1868	3432094	Direct		false
1869	3432095	Direct		false
1870	3432096	Direct		false
1871	3432097	Direct		false
1872	3432098	Direct		false
1873	3432099	Direct		false
1874	3432100	Direct		false
1875	3432101	Direct		false
1876	3432102	Direct		false
1877	3432103	Direct		false
1878	3432104	Direct		false
1879	3432105	Direct		false
1880	3432106	Direct		false
1881	3432107	Direct		false
1882	3432108	Direct		false
1883	3432109	Direct		false
1884	3432110	Direct		false
1885	3432111	Direct		false
1886	3432112	Direct		false
1887	3432113	Direct		false
1888	3432114	Direct		false
1889	3432115	Direct		false
1890	3432116	Direct		false
1891	3432117	Direct		false
1892	3432118	Direct		false
1893	3432119	Direct		false
1894	3432120	Direct		false
1895	3432121	Direct		false
1896	3432122	Direct		false
1897	3432123	Direct		false
1898	3432124	Direct		false
1899	3432125	Direct		false
1900	3432126	Direct		false
1901	3432127	Direct		false
1902	3432128	Direct		false
1903	3432129	Direct		false
1904	3432130	Direct		false
1905	3432131	Direct		false
1906	3432132	Direct		false
1907	3432133	Direct		false
1908	3432134	Direct		false
1909	3432135	Direct		false
1910	3432136	Direct		false
1911	3432137	Direct		false
1912	3432138	Direct		false
1913	3432139	Direct		false
1914	3432140	Direct		false
1915	3432141	Direct		false
1916	3432142	Direct		false
1917	3432143	Direct		false
1918	3432144	Direct		false
1919	3432145	Direct		false
1920	3432146	Direct		false
1921	3432147	Direct		false
1922	3432148	Direct		false
1923	3432149	Direct		false
1924	3432150	Direct		false
1925	3432151	Direct		false
1926	3432152	Direct		false
1927	3432153	Direct		false
1928	3432154	Direct		false
1929	3432155	Direct		false
1930	3432156	Direct		false
1931	3432157	Direct		false
1932	3432158	Direct		false
1933	3432159	Direct		false
1934	3432160	Direct		false
1935	3432161	Direct		false
1936	3432162	Direct		false
1937	3432163	Direct		false
1938	3432164	Direct		false
1939	3432165	Direct		false
1940	3432166	Direct		false
1941	3432167	Direct		false
1942	3432168	Direct		false
1943	3432169	Direct		false
1944	3432170	Direct		false
1945	3432171	Direct		false
1946	3432172	Direct		false
1947	3432173	Direct		false
1948	3432174	Direct		false
1949	3432175	Direct		false
1950	3432176	Direct		false
1951	3432177	Direct		false
1952	3432178	Direct		false
1953	3432179	Direct		false
1954	3432180	Direct		false
1955	3432181	Direct		false
1956	3432182	Direct		false
1957	3432183	Direct		false
1958	3432184	Direct		false
1959	3432185	Direct		false
1960	3432186	Direct		false
1961	3432187	Direct		false
1962	3432188	Direct		false
1963	3432189	Direct		false
1964	3432190	Direct		false
1965	3432191	Direct		false
1966	3432192	Direct		false
1967	3432193	Direct		false
1968	3432194	Direct		false
1969	3432195	Direct		false
1970	3432196	Direct		false
1971	3432197	Direct		false
1972	3432198	Direct		false
1973	3432199	Direct		false
1974	3432200	Direct		false
1975	3432201	Direct		false
1976	3432202	Direct		false
1977	3432203	Direct		false
1978	3432204	Direct		false
1979	3432205	Direct		false
1980	3432206	Direct		false
1981	3432207	Direct		false
1982	3432208	Direct		false
1983	3432209	Direct		false
1984	3432210	Direct		false
1985	3432211	Direct		false
1986	3432212	Direct		false
1987	3432213	Direct		false
1988	3432214	Direct		false
1989	3432215	Direct		false
1990	3432216	Direct		false
1991	3432217	Direct		false
1992	3432218	Direct		false
1993	3432219	Direct		false
1994	3432220	Direct		false
1995	3432221	Direct		false
1996	3432222	Direct		false
1997	3432223	Direct		false
1998	3432224	Direct		false
1999	3432225	Direct		false
2000	3432226	Direct		false
2001	3432227	Direct		false
2002	3432228	Direct		false
2003	3432229	Direct		false
2004	3432230	Direct		false
2005	3432231	Direct		false
2006	3432232	Direct		false
2007	3432233	Direct		false
2008	3432234	Direct		false
2009	3432235	Direct		false
2010	3432236	Direct		false
2011	3432237	Direct		false
2012	3432238	Direct		false
2013	3432239	Direct		false
2014	3432240	Direct		false
2015	3432241	Direct		false
2016	3432242	Direct		false
2017	3432243	Direct		false
2018	3432244	Direct		false
2019	3432245	Direct		false
2020	3432246	Direct		false
2021	3432247	Direct		false
2022	3432248	Direct		false
2023	3432249	Direct		false
2024	3432250	Direct		false
2025	3432251	Direct		false
2026	3432252	Direct		false
2027	3432253	Direct		false
2028	3432254	Direct		false
2029	3432255	Direct		false
2030	3432256	Direct		false
2031	3432257	Direct		false
2032	3432258	Direct		false
2033	3432259	Direct		false
2034	3432260	Direct		false
2035	3432261	Direct		false
2036	3432262	Direct		false
2037	3432263	Direct		false
2038	3432264	Direct		false
2039	3432265	Direct		false
2040	3432266	Direct		false
2041	3432267	Direct		false
2042	3432268	Direct		false
2043	3432269	Direct		false
2044	3432270	Direct		false
2045	3432271	Direct		false
2046	3432272	Direct		false
2047	3432273	Direct		false
2048	3432274	Direct		false
2049	3432275	Direct		false
2050	3432276	Direct		false
2051	3432277	Direct		false
2052	3432278	Direct		false
2053	3432279	Direct		false
2054	3432280	Direct		false
2055	3432281	Direct		false
2056	3432282	Direct		false
2057	3432283	Direct		false
2058	3432284	Direct		false
2059	3432285	Direct		false
2060	3432286	Direct		false
2061	3432287	Direct		false
2062	3432288	Direct		false
2063	3432289	Direct		false
2064	3432290	Direct		false
2065	3432291	Direct		false
2066	3432292	Direct		false
2067	3432293	Direct		false
2068	3432294	Direct		false
2069	3432295	Direct		false
2070	3432296	Direct		false
2071	3432297	Direct		false
2072	3432298	Direct		false
2073	3432299	Direct		false
2074	3432300	Direct		false
2075	3432301	Direct		false
2076	3432302	Direct		false
2077	3432303	Direct		false
2078	3432304	Direct		false
2079	3432305	Direct		false
2080	3432306	Direct		false
2081	3432307	Direct		false
2082	3432308	Direct		false
2083	3432309	Direct		false
2084	3432310	Direct		false
2085	3432311	Direct		false
2086	3432312	Direct		false
2087	3432313	Direct		false
2088	3432314	Direct		false
2089	3432315	Direct		false
2090	3432316	Direct		false
2091	3432317	Direct		false
2092	3432318	Direct		false
2093	3432319	Direct		false
2094	3432320	Direct		false
2095	3432321	Direct		false
2096	3432322	Direct		false
2097	3432323	Direct		false
2098	3432324	Direct		false
2099	3432325	Direct		false
2100	3432326	Direct		false
2101	3432327	Direct		false
2102	3432328	Direct		false
2103	3432329	Direct		false
2104	3432330	Direct		false
2105	3432331	Direct		false
2106	3432332	Direct		false
2107	3432333	Direct		false
2108	3432334	Direct		false
2109	3432335	Direct		false
2110	3432336	Direct		false
2111	3432337	Direct		false
2112	3432338	Direct		false
2113	3432339	Direct		false
2114	3432340	Direct		false
2115	3432341	Direct		false
2116	3432342	Direct		false
2117	3432343	Direct		false
2118	3432344	Direct		false
2119	3432345	Direct		false
2120	3432346	Direct		false
2121	3432347	Direct		false
2122	3432348	Direct		false
2123	3432349	Direct		false
2124	3432350	Direct		false
2125	3432351	Direct		false
2126	3432352	Direct		false
2127	3432353	Direct		false
2128	3432354	Direct		false
2129	3432355	Direct		false
2130	3432356	Direct		false
2131	3432357	Direct		false
2132	3432358	Direct		false
2133	3432359	Direct		false
2134	3432360	Direct		false
2135	3432361	Direct		false
2136	3432362	Direct		false
2137	3432363	Direct		false
2138	3432364	Direct		false
2139	3432365	Direct		false
2140	3432366	Direct		false
2141	3432367	Direct		false
2142	3432368	Direct		false
2143	3432369	Direct		false
2190	3432416	Direct		false
2191	3432417	Direct		false
2192	3432418	Direct		false
2193	3432419	Direct		false
2194	3432420	Direct		false
2195	3432421	Direct		false
2196	3432422	Direct		false
2197	3432423	Direct		false
2198	3432424	Direct		false
2199	3432425	Direct		false
2200	3432426	Direct		false
2201	3432427	Direct		false
2202	3432428	Direct		false
2203	3432429	Direct		false
2204	3432430	Direct		false
2205	3432431	Direct		false
2206	3432432	Direct		false
2207	3432433	Direct		false
2208	3432434	Direct		false
2209	3432435	Direct		false
2210	3432436	Direct		false
2211	3432437	Direct		false
2212	3432438	Direct		false
2213	3432439	Direct		false
2214	3432440	Direct		false
2215	3432441	Direct		false
2216	3432442	Direct		false
2217	3432443	Direct		false
2218	3432444	Direct		false
2219	3432445	Direct		false
2220	3432446	Direct		false
2221	3432447	Direct		false
2222	3432448	Direct		false
2223	3432449	Direct		false
2224	3432450	Direct		false
2225	3432451	Direct		false
2226	3432452	Direct		false
2227	3432453	Direct		false
2228	3432454	Direct		false
2229	3432455	Direct		false
2230	3432456	Direct		false
2231	3432457	Direct		false
2232	3432458	Direct		false
2233	3432459	Direct		false
2234	3432460	Direct		false
2235	3432461	Direct		false
2236	3432462	Direct		false
2237	3432463	Direct		false
2238	3432464	Direct		false
2239	3432465	Direct		false
2240	3432466	Direct		false
2241	3432467	Direct		false
2242	3432468	Direct		false
2243	3432469	Direct		false
2244	3432470	Direct		false
2245	3432471	Direct		false
2246	3432472	Direct		false
2247	3432473	Direct		false
2248	3432474	Direct		false
2249	3432475	Direct		false
2250	3432476	Direct		false
2251	3432477	Direct		false
2252	3432478	Direct		false
2253	3432479	Direct		false
2254	3432480	Direct		false
2255	3432481	Direct		false
2256	3432482	Direct		false
2257	3432483	Direct		false
2258	3432484	Direct		false
2259	3432485	Direct		false
2260	3432486	Direct		false
2261	3432487	Direct		false
2262	3432488	Direct		false
2263	3432489	Direct		false
2264	3432490	Direct		false
2265	3432491	Direct		false
2266	3432492	Direct		false
2267	3432493	Direct		false
2268	3432494	Direct		false
2269	3432495	Direct		false
2270	3432496	Direct		false
2271	3432497	Direct		false
2272	3432498	Direct		false
