# Supplementary material for: A zebrafish screen reveals Renin-angiotensin system inhibitors as neuroprotective via mitochondrial restoration in dopamine neurons
Source: eLife journal article supplement (doi:10.7554/elife.69795), 2021-09-22
Supplement: fig5-data4 [file elife-69795-fig5-data4-v1.cys › CytoscapeSession-2021_03_12-09_32/tables/1162-ColorByPValue/LOCAL_ATTRS-org.cytoscape.model.CyNode-ColorByPValue+default+node.cytable]

CyCSV-Version	1
SUID	name	selected
java.lang.Long	java.lang.String	java.lang.Boolean
ColorByPValue default node
1174	3	false
1176	5	false
1178	7	false
1179	8	false
1181	10	false
1182	11	false
1183	12	false
1184	13	false
1185	14	false
1187	16	false
1188	17	false
1189	18	false
1190	19	false
1191	20	false
1201	30	false
1202	31	false
1203	32	false
1204	33	false
1205	34	false
1206	35	false
1207	36	false
1208	37	false
1209	38	false
1214	43	false
1215	44	false
1216	45	false
1217	46	false
1218	47	false
1219	48	false
1220	49	false
1221	50	false
1222	51	false
1223	52	false
1224	53	false
1225	54	false
1226	55	false
1227	56	false
1228	57	false
1229	58	false
1230	59	false
1231	60	false
1232	61	false
1233	62	false
1234	63	false
1235	64	false
1236	65	false
1237	66	false
1245	74	false
1246	75	false
1247	76	false
1255	84	false
1256	85	false
1257	86	false
1258	87	false
1259	88	false
1260	89	false
1261	90	false
1262	91	false
1264	93	false
1265	94	false
1266	95	false
1267	96	false
1268	97	false
1269	98	false
1270	99	false
1271	100	false
1272	101	false
1273	102	false
1274	103	false
1275	104	false
1276	105	false
1277	106	false
1278	107	false
1279	108	false
1280	109	false
1281	110	false
1282	111	false
1283	112	false
1284	113	false
1285	114	false
1286	115	false
1287	116	false
1288	117	false
1289	118	false
1290	119	false
1291	120	false
1292	121	false
1293	122	false
1294	123	false
1295	124	false
1296	125	false
1297	126	false
1298	127	false
1299	128	false
1300	129	false
1301	130	false
1302	131	false
1303	132	false
1304	133	false
1305	134	false
1306	135	false
1307	136	false
1308	137	false
1309	138	false
1310	139	false
1311	140	false
1312	141	false
1313	142	false
1314	143	false
1315	144	false
1316	145	false
1317	146	false
1318	147	false
1319	148	false
1320	149	false
1321	150	false
1322	151	false
1332	161	false
1333	162	false
1334	163	false
1335	164	false
1336	165	false
1337	166	false
1338	167	false
1339	168	false
1340	169	false
