# Supplementary material for: A zebrafish screen reveals Renin-angiotensin system inhibitors as neuroprotective via mitochondrial restoration in dopamine neurons
Source: eLife journal article supplement (doi:10.7554/elife.69795), 2021-09-22
Supplement: fig5-data4 [file elife-69795-fig5-data4-v1.cys › CytoscapeSession-2021_03_12-09_32/tables/cytables.xml]

<?xml version="1.0" encoding="UTF-8" standalone="yes"?>
<cyTables>
    <virtualColumns>
        <virtualColumn name="shared name" sourceColumn="shared name" sourceTable="35-From+cyREST/SHARED_ATTRS-org.cytoscape.model.CyNetwork-35+shared+network.cytable" sourceJoinKey="SUID" targetTable="51-ColorByCluster/LOCAL_ATTRS-org.cytoscape.model.CyNetwork-ColorByCluster+default+network.cytable" targetJoinKey="SUID" immutable="false"/>
        <virtualColumn name="shared name" sourceColumn="shared name" sourceTable="35-From+cyREST/SHARED_ATTRS-org.cytoscape.model.CyEdge-35+shared+edge.cytable" sourceJoinKey="SUID" targetTable="51-ColorByCluster/LOCAL_ATTRS-org.cytoscape.model.CyEdge-ColorByCluster+default+edge.cytable" targetJoinKey="SUID" immutable="false"/>
        <virtualColumn name="shared interaction" sourceColumn="shared interaction" sourceTable="35-From+cyREST/SHARED_ATTRS-org.cytoscape.model.CyEdge-35+shared+edge.cytable" sourceJoinKey="SUID" targetTable="51-ColorByCluster/LOCAL_ATTRS-org.cytoscape.model.CyEdge-ColorByCluster+default+edge.cytable" targetJoinKey="SUID" immutable="false"/>
        <virtualColumn name="Gene_A" sourceColumn="Gene_A" sourceTable="35-From+cyREST/SHARED_ATTRS-org.cytoscape.model.CyEdge-35+shared+edge.cytable" sourceJoinKey="SUID" targetTable="51-ColorByCluster/LOCAL_ATTRS-org.cytoscape.model.CyEdge-ColorByCluster+default+edge.cytable" targetJoinKey="SUID" immutable="false"/>
        <virtualColumn name="Name_A" sourceColumn="Name_A" sourceTable="35-From+cyREST/SHARED_ATTRS-org.cytoscape.model.CyEdge-35+shared+edge.cytable" sourceJoinKey="SUID" targetTable="51-ColorByCluster/LOCAL_ATTRS-org.cytoscape.model.CyEdge-ColorByCluster+default+edge.cytable" targetJoinKey="SUID" immutable="false"/>
        <virtualColumn name="Gene_B" sourceColumn="Gene_B" sourceTable="35-From+cyREST/SHARED_ATTRS-org.cytoscape.model.CyEdge-35+shared+edge.cytable" sourceJoinKey="SUID" targetTable="51-ColorByCluster/LOCAL_ATTRS-org.cytoscape.model.CyEdge-ColorByCluster+default+edge.cytable" targetJoinKey="SUID" immutable="false"/>
        <virtualColumn name="Name_B" sourceColumn="Name_B" sourceTable="35-From+cyREST/SHARED_ATTRS-org.cytoscape.model.CyEdge-35+shared+edge.cytable" sourceJoinKey="SUID" targetTable="51-ColorByCluster/LOCAL_ATTRS-org.cytoscape.model.CyEdge-ColorByCluster+default+edge.cytable" targetJoinKey="SUID" immutable="false"/>
        <virtualColumn name="TYPE" sourceColumn="TYPE" sourceTable="35-From+cyREST/SHARED_ATTRS-org.cytoscape.model.CyEdge-35+shared+edge.cytable" sourceJoinKey="SUID" targetTable="51-ColorByCluster/LOCAL_ATTRS-org.cytoscape.model.CyEdge-ColorByCluster+default+edge.cytable" targetJoinKey="SUID" immutable="false"/>
        <virtualColumn name="SCORE" sourceColumn="SCORE" sourceTable="35-From+cyREST/SHARED_ATTRS-org.cytoscape.model.CyEdge-35+shared+edge.cytable" sourceJoinKey="SUID" targetTable="51-ColorByCluster/LOCAL_ATTRS-org.cytoscape.model.CyEdge-ColorByCluster+default+edge.cytable" targetJoinKey="SUID" immutable="false"/>
        <virtualColumn name="source" sourceColumn="source" sourceTable="35-From+cyREST/SHARED_ATTRS-org.cytoscape.model.CyEdge-35+shared+edge.cytable" sourceJoinKey="SUID" targetTable="51-ColorByCluster/LOCAL_ATTRS-org.cytoscape.model.CyEdge-ColorByCluster+default+edge.cytable" targetJoinKey="SUID" immutable="false"/>
        <virtualColumn name="target" sourceColumn="target" sourceTable="35-From+cyREST/SHARED_ATTRS-org.cytoscape.model.CyEdge-35+shared+edge.cytable" sourceJoinKey="SUID" targetTable="51-ColorByCluster/LOCAL_ATTRS-org.cytoscape.model.CyEdge-ColorByCluster+default+edge.cytable" targetJoinKey="SUID" immutable="false"/>
        <virtualColumn name="source_original" sourceColumn="source_original" sourceTable="35-From+cyREST/SHARED_ATTRS-org.cytoscape.model.CyEdge-35+shared+edge.cytable" sourceJoinKey="SUID" targetTable="51-ColorByCluster/LOCAL_ATTRS-org.cytoscape.model.CyEdge-ColorByCluster+default+edge.cytable" targetJoinKey="SUID" immutable="false"/>
        <virtualColumn name="target_original" sourceColumn="target_original" sourceTable="35-From+cyREST/SHARED_ATTRS-org.cytoscape.model.CyEdge-35+shared+edge.cytable" sourceJoinKey="SUID" targetTable="51-ColorByCluster/LOCAL_ATTRS-org.cytoscape.model.CyEdge-ColorByCluster+default+edge.cytable" targetJoinKey="SUID" immutable="false"/>
        <virtualColumn name="shared name" sourceColumn="shared name" sourceTable="35-From+cyREST/SHARED_ATTRS-org.cytoscape.model.CyNode-35+shared+node.cytable" sourceJoinKey="SUID" targetTable="51-ColorByCluster/LOCAL_ATTRS-org.cytoscape.model.CyNode-ColorByCluster+default+node.cytable" targetJoinKey="SUID" immutable="false"/>
        <virtualColumn name="canonicalName" sourceColumn="canonicalName" sourceTable="35-From+cyREST/SHARED_ATTRS-org.cytoscape.model.CyNode-35+shared+node.cytable" sourceJoinKey="SUID" targetTable="51-ColorByCluster/LOCAL_ATTRS-org.cytoscape.model.CyNode-ColorByCluster+default+node.cytable" targetJoinKey="SUID" immutable="false"/>
        <virtualColumn name="Description" sourceColumn="Description" sourceTable="35-From+cyREST/SHARED_ATTRS-org.cytoscape.model.CyNode-35+shared+node.cytable" sourceJoinKey="SUID" targetTable="51-ColorByCluster/LOCAL_ATTRS-org.cytoscape.model.CyNode-ColorByCluster+default+node.cytable" targetJoinKey="SUID" immutable="false"/>
        <virtualColumn name="Category" sourceColumn="Category" sourceTable="35-From+cyREST/SHARED_ATTRS-org.cytoscape.model.CyNode-35+shared+node.cytable" sourceJoinKey="SUID" targetTable="51-ColorByCluster/LOCAL_ATTRS-org.cytoscape.model.CyNode-ColorByCluster+default+node.cytable" targetJoinKey="SUID" immutable="false"/>
        <virtualColumn name="LogP" sourceColumn="LogP" sourceTable="35-From+cyREST/SHARED_ATTRS-org.cytoscape.model.CyNode-35+shared+node.cytable" sourceJoinKey="SUID" targetTable="51-ColorByCluster/LOCAL_ATTRS-org.cytoscape.model.CyNode-ColorByCluster+default+node.cytable" targetJoinKey="SUID" immutable="false"/>
        <virtualColumn name="Log(q-value)" sourceColumn="Log(q-value)" sourceTable="35-From+cyREST/SHARED_ATTRS-org.cytoscape.model.CyNode-35+shared+node.cytable" sourceJoinKey="SUID" targetTable="51-ColorByCluster/LOCAL_ATTRS-org.cytoscape.model.CyNode-ColorByCluster+default+node.cytable" targetJoinKey="SUID" immutable="false"/>
        <virtualColumn name="GROUP_ID" sourceColumn="GROUP_ID" sourceTable="35-From+cyREST/SHARED_ATTRS-org.cytoscape.model.CyNode-35+shared+node.cytable" sourceJoinKey="SUID" targetTable="51-ColorByCluster/LOCAL_ATTRS-org.cytoscape.model.CyNode-ColorByCluster+default+node.cytable" targetJoinKey="SUID" immutable="false"/>
        <virtualColumn name="Hits" sourceColumn="Hits" sourceTable="35-From+cyREST/SHARED_ATTRS-org.cytoscape.model.CyNode-35+shared+node.cytable" sourceJoinKey="SUID" targetTable="51-ColorByCluster/LOCAL_ATTRS-org.cytoscape.model.CyNode-ColorByCluster+default+node.cytable" targetJoinKey="SUID" immutable="false"/>
        <virtualColumn name="Enrichment" sourceColumn="Enrichment" sourceTable="35-From+cyREST/SHARED_ATTRS-org.cytoscape.model.CyNode-35+shared+node.cytable" sourceJoinKey="SUID" targetTable="51-ColorByCluster/LOCAL_ATTRS-org.cytoscape.model.CyNode-ColorByCluster+default+node.cytable" targetJoinKey="SUID" immutable="false"/>
        <virtualColumn name="Z-score" sourceColumn="Z-score" sourceTable="35-From+cyREST/SHARED_ATTRS-org.cytoscape.model.CyNode-35+shared+node.cytable" sourceJoinKey="SUID" targetTable="51-ColorByCluster/LOCAL_ATTRS-org.cytoscape.model.CyNode-ColorByCluster+default+node.cytable" targetJoinKey="SUID" immutable="false"/>
        <virtualColumn name="#GeneInGOAndHitList" sourceColumn="#GeneInGOAndHitList" sourceTable="35-From+cyREST/SHARED_ATTRS-org.cytoscape.model.CyNode-35+shared+node.cytable" sourceJoinKey="SUID" targetTable="51-ColorByCluster/LOCAL_ATTRS-org.cytoscape.model.CyNode-ColorByCluster+default+node.cytable" targetJoinKey="SUID" immutable="false"/>
        <virtualColumn name="#GeneInGO" sourceColumn="#GeneInGO" sourceTable="35-From+cyREST/SHARED_ATTRS-org.cytoscape.model.CyNode-35+shared+node.cytable" sourceJoinKey="SUID" targetTable="51-ColorByCluster/LOCAL_ATTRS-org.cytoscape.model.CyNode-ColorByCluster+default+node.cytable" targetJoinKey="SUID" immutable="false"/>
        <virtualColumn name="#GeneInHitList" sourceColumn="#GeneInHitList" sourceTable="35-From+cyREST/SHARED_ATTRS-org.cytoscape.model.CyNode-35+shared+node.cytable" sourceJoinKey="SUID" targetTable="51-ColorByCluster/LOCAL_ATTRS-org.cytoscape.model.CyNode-ColorByCluster+default+node.cytable" targetJoinKey="SUID" immutable="false"/>
        <virtualColumn name="#TotalGeneInLibrary" sourceColumn="#TotalGeneInLibrary" sourceTable="35-From+cyREST/SHARED_ATTRS-org.cytoscape.model.CyNode-35+shared+node.cytable" sourceJoinKey="SUID" targetTable="51-ColorByCluster/LOCAL_ATTRS-org.cytoscape.model.CyNode-ColorByCluster+default+node.cytable" targetJoinKey="SUID" immutable="false"/>
        <virtualColumn name="%InGO" sourceColumn="%InGO" sourceTable="35-From+cyREST/SHARED_ATTRS-org.cytoscape.model.CyNode-35+shared+node.cytable" sourceJoinKey="SUID" targetTable="51-ColorByCluster/LOCAL_ATTRS-org.cytoscape.model.CyNode-ColorByCluster+default+node.cytable" targetJoinKey="SUID" immutable="false"/>
        <virtualColumn name="STDV %InGO" sourceColumn="STDV %InGO" sourceTable="35-From+cyREST/SHARED_ATTRS-org.cytoscape.model.CyNode-35+shared+node.cytable" sourceJoinKey="SUID" targetTable="51-ColorByCluster/LOCAL_ATTRS-org.cytoscape.model.CyNode-ColorByCluster+default+node.cytable" targetJoinKey="SUID" immutable="false"/>
        <virtualColumn name="BestLogPInGroup" sourceColumn="BestLogPInGroup" sourceTable="35-From+cyREST/SHARED_ATTRS-org.cytoscape.model.CyNode-35+shared+node.cytable" sourceJoinKey="SUID" targetTable="51-ColorByCluster/LOCAL_ATTRS-org.cytoscape.model.CyNode-ColorByCluster+default+node.cytable" targetJoinKey="SUID" immutable="false"/>
        <virtualColumn name="BestEnrichmentInGroup" sourceColumn="BestEnrichmentInGroup" sourceTable="35-From+cyREST/SHARED_ATTRS-org.cytoscape.model.CyNode-35+shared+node.cytable" sourceJoinKey="SUID" targetTable="51-ColorByCluster/LOCAL_ATTRS-org.cytoscape.model.CyNode-ColorByCluster+default+node.cytable" targetJoinKey="SUID" immutable="false"/>
        <virtualColumn name="FirstInGroupByEnrichment" sourceColumn="FirstInGroupByEnrichment" sourceTable="35-From+cyREST/SHARED_ATTRS-org.cytoscape.model.CyNode-35+shared+node.cytable" sourceJoinKey="SUID" targetTable="51-ColorByCluster/LOCAL_ATTRS-org.cytoscape.model.CyNode-ColorByCluster+default+node.cytable" targetJoinKey="SUID" immutable="false"/>
        <virtualColumn name="FirstInGroupByLogP" sourceColumn="FirstInGroupByLogP" sourceTable="35-From+cyREST/SHARED_ATTRS-org.cytoscape.model.CyNode-35+shared+node.cytable" sourceJoinKey="SUID" targetTable="51-ColorByCluster/LOCAL_ATTRS-org.cytoscape.model.CyNode-ColorByCluster+default+node.cytable" targetJoinKey="SUID" immutable="false"/>
        <virtualColumn name="GeneID" sourceColumn="GeneID" sourceTable="35-From+cyREST/SHARED_ATTRS-org.cytoscape.model.CyNode-35+shared+node.cytable" sourceJoinKey="SUID" targetTable="51-ColorByCluster/LOCAL_ATTRS-org.cytoscape.model.CyNode-ColorByCluster+default+node.cytable" targetJoinKey="SUID" immutable="false"/>
        <virtualColumn name="_RANK_" sourceColumn="_RANK_" sourceTable="35-From+cyREST/SHARED_ATTRS-org.cytoscape.model.CyNode-35+shared+node.cytable" sourceJoinKey="SUID" targetTable="51-ColorByCluster/LOCAL_ATTRS-org.cytoscape.model.CyNode-ColorByCluster+default+node.cytable" targetJoinKey="SUID" immutable="false"/>
        <virtualColumn name="_PATTERN_" sourceColumn="_PATTERN_" sourceTable="35-From+cyREST/SHARED_ATTRS-org.cytoscape.model.CyNode-35+shared+node.cytable" sourceJoinKey="SUID" targetTable="51-ColorByCluster/LOCAL_ATTRS-org.cytoscape.model.CyNode-ColorByCluster+default+node.cytable" targetJoinKey="SUID" immutable="false"/>
        <virtualColumn name="CLUSTER_LABEL" sourceColumn="CLUSTER_LABEL" sourceTable="35-From+cyREST/SHARED_ATTRS-org.cytoscape.model.CyNode-35+shared+node.cytable" sourceJoinKey="SUID" targetTable="51-ColorByCluster/LOCAL_ATTRS-org.cytoscape.model.CyNode-ColorByCluster+default+node.cytable" targetJoinKey="SUID" immutable="false"/>
        <virtualColumn name="#COUNT_001" sourceColumn="#COUNT_001" sourceTable="35-From+cyREST/SHARED_ATTRS-org.cytoscape.model.CyNode-35+shared+node.cytable" sourceJoinKey="SUID" targetTable="51-ColorByCluster/LOCAL_ATTRS-org.cytoscape.model.CyNode-ColorByCluster+default+node.cytable" targetJoinKey="SUID" immutable="false"/>
        <virtualColumn name="_MEMBER_MyList" sourceColumn="_MEMBER_MyList" sourceTable="35-From+cyREST/SHARED_ATTRS-org.cytoscape.model.CyNode-35+shared+node.cytable" sourceJoinKey="SUID" targetTable="51-ColorByCluster/LOCAL_ATTRS-org.cytoscape.model.CyNode-ColorByCluster+default+node.cytable" targetJoinKey="SUID" immutable="false"/>
        <virtualColumn name="_LogP_MyList" sourceColumn="_LogP_MyList" sourceTable="35-From+cyREST/SHARED_ATTRS-org.cytoscape.model.CyNode-35+shared+node.cytable" sourceJoinKey="SUID" targetTable="51-ColorByCluster/LOCAL_ATTRS-org.cytoscape.model.CyNode-ColorByCluster+default+node.cytable" targetJoinKey="SUID" immutable="false"/>
        <virtualColumn name="Gene" sourceColumn="Gene" sourceTable="35-From+cyREST/SHARED_ATTRS-org.cytoscape.model.CyNode-35+shared+node.cytable" sourceJoinKey="SUID" targetTable="51-ColorByCluster/LOCAL_ATTRS-org.cytoscape.model.CyNode-ColorByCluster+default+node.cytable" targetJoinKey="SUID" immutable="false"/>
        <virtualColumn name="GiniIndex" sourceColumn="GiniIndex" sourceTable="35-From+cyREST/SHARED_ATTRS-org.cytoscape.model.CyNode-35+shared+node.cytable" sourceJoinKey="SUID" targetTable="51-ColorByCluster/LOCAL_ATTRS-org.cytoscape.model.CyNode-ColorByCluster+default+node.cytable" targetJoinKey="SUID" immutable="false"/>
        <virtualColumn name="CategoryID" sourceColumn="CategoryID" sourceTable="35-From+cyREST/SHARED_ATTRS-org.cytoscape.model.CyNode-35+shared+node.cytable" sourceJoinKey="SUID" targetTable="51-ColorByCluster/LOCAL_ATTRS-org.cytoscape.model.CyNode-ColorByCluster+default+node.cytable" targetJoinKey="SUID" immutable="false"/>
        <virtualColumn name="PARENT_GO" sourceColumn="PARENT_GO" sourceTable="35-From+cyREST/SHARED_ATTRS-org.cytoscape.model.CyNode-35+shared+node.cytable" sourceJoinKey="SUID" targetTable="51-ColorByCluster/LOCAL_ATTRS-org.cytoscape.model.CyNode-ColorByCluster+default+node.cytable" targetJoinKey="SUID" immutable="false"/>
        <virtualColumn name="EvidenceCutoff" sourceColumn="EvidenceCutoff" sourceTable="35-From+cyREST/SHARED_ATTRS-org.cytoscape.model.CyNode-35+shared+node.cytable" sourceJoinKey="SUID" targetTable="51-ColorByCluster/LOCAL_ATTRS-org.cytoscape.model.CyNode-ColorByCluster+default+node.cytable" targetJoinKey="SUID" immutable="false"/>
        <virtualColumn name="id" sourceColumn="id" sourceTable="35-From+cyREST/SHARED_ATTRS-org.cytoscape.model.CyNode-35+shared+node.cytable" sourceJoinKey="SUID" targetTable="51-ColorByCluster/LOCAL_ATTRS-org.cytoscape.model.CyNode-ColorByCluster+default+node.cytable" targetJoinKey="SUID" immutable="false"/>
        <virtualColumn name="STDV_InGO" sourceColumn="STDV_InGO" sourceTable="35-From+cyREST/SHARED_ATTRS-org.cytoscape.model.CyNode-35+shared+node.cytable" sourceJoinKey="SUID" targetTable="51-ColorByCluster/LOCAL_ATTRS-org.cytoscape.model.CyNode-ColorByCluster+default+node.cytable" targetJoinKey="SUID" immutable="false"/>
        <virtualColumn name="Log_q_value_" sourceColumn="Log_q_value_" sourceTable="35-From+cyREST/SHARED_ATTRS-org.cytoscape.model.CyNode-35+shared+node.cytable" sourceJoinKey="SUID" targetTable="51-ColorByCluster/LOCAL_ATTRS-org.cytoscape.model.CyNode-ColorByCluster+default+node.cytable" targetJoinKey="SUID" immutable="false"/>
        <virtualColumn name="Symbol" sourceColumn="Symbol" sourceTable="35-From+cyREST/SHARED_ATTRS-org.cytoscape.model.CyNode-35+shared+node.cytable" sourceJoinKey="SUID" targetTable="51-ColorByCluster/LOCAL_ATTRS-org.cytoscape.model.CyNode-ColorByCluster+default+node.cytable" targetJoinKey="SUID" immutable="false"/>
        <virtualColumn name="Z_score" sourceColumn="Z_score" sourceTable="35-From+cyREST/SHARED_ATTRS-org.cytoscape.model.CyNode-35+shared+node.cytable" sourceJoinKey="SUID" targetTable="51-ColorByCluster/LOCAL_ATTRS-org.cytoscape.model.CyNode-ColorByCluster+default+node.cytable" targetJoinKey="SUID" immutable="false"/>
        <virtualColumn name="_InGO" sourceColumn="_InGO" sourceTable="35-From+cyREST/SHARED_ATTRS-org.cytoscape.model.CyNode-35+shared+node.cytable" sourceJoinKey="SUID" targetTable="51-ColorByCluster/LOCAL_ATTRS-org.cytoscape.model.CyNode-ColorByCluster+default+node.cytable" targetJoinKey="SUID" immutable="false"/>
        <virtualColumn name="shared name" sourceColumn="shared name" sourceTable="35-From+cyREST/SHARED_ATTRS-org.cytoscape.model.CyNetwork-35+shared+network.cytable" sourceJoinKey="SUID" targetTable="1162-ColorByPValue/LOCAL_ATTRS-org.cytoscape.model.CyNetwork-ColorByPValue+default+network.cytable" targetJoinKey="SUID" immutable="false"/>
        <virtualColumn name="shared name" sourceColumn="shared name" sourceTable="35-From+cyREST/SHARED_ATTRS-org.cytoscape.model.CyNode-35+shared+node.cytable" sourceJoinKey="SUID" targetTable="1162-ColorByPValue/LOCAL_ATTRS-org.cytoscape.model.CyNode-ColorByPValue+default+node.cytable" targetJoinKey="SUID" immutable="false"/>
        <virtualColumn name="canonicalName" sourceColumn="canonicalName" sourceTable="35-From+cyREST/SHARED_ATTRS-org.cytoscape.model.CyNode-35+shared+node.cytable" sourceJoinKey="SUID" targetTable="1162-ColorByPValue/LOCAL_ATTRS-org.cytoscape.model.CyNode-ColorByPValue+default+node.cytable" targetJoinKey="SUID" immutable="false"/>
        <virtualColumn name="Description" sourceColumn="Description" sourceTable="35-From+cyREST/SHARED_ATTRS-org.cytoscape.model.CyNode-35+shared+node.cytable" sourceJoinKey="SUID" targetTable="1162-ColorByPValue/LOCAL_ATTRS-org.cytoscape.model.CyNode-ColorByPValue+default+node.cytable" targetJoinKey="SUID" immutable="false"/>
        <virtualColumn name="Category" sourceColumn="Category" sourceTable="35-From+cyREST/SHARED_ATTRS-org.cytoscape.model.CyNode-35+shared+node.cytable" sourceJoinKey="SUID" targetTable="1162-ColorByPValue/LOCAL_ATTRS-org.cytoscape.model.CyNode-ColorByPValue+default+node.cytable" targetJoinKey="SUID" immutable="false"/>
        <virtualColumn name="LogP" sourceColumn="LogP" sourceTable="35-From+cyREST/SHARED_ATTRS-org.cytoscape.model.CyNode-35+shared+node.cytable" sourceJoinKey="SUID" targetTable="1162-ColorByPValue/LOCAL_ATTRS-org.cytoscape.model.CyNode-ColorByPValue+default+node.cytable" targetJoinKey="SUID" immutable="false"/>
        <virtualColumn name="Log(q-value)" sourceColumn="Log(q-value)" sourceTable="35-From+cyREST/SHARED_ATTRS-org.cytoscape.model.CyNode-35+shared+node.cytable" sourceJoinKey="SUID" targetTable="1162-ColorByPValue/LOCAL_ATTRS-org.cytoscape.model.CyNode-ColorByPValue+default+node.cytable" targetJoinKey="SUID" immutable="false"/>
        <virtualColumn name="GROUP_ID" sourceColumn="GROUP_ID" sourceTable="35-From+cyREST/SHARED_ATTRS-org.cytoscape.model.CyNode-35+shared+node.cytable" sourceJoinKey="SUID" targetTable="1162-ColorByPValue/LOCAL_ATTRS-org.cytoscape.model.CyNode-ColorByPValue+default+node.cytable" targetJoinKey="SUID" immutable="false"/>
        <virtualColumn name="Hits" sourceColumn="Hits" sourceTable="35-From+cyREST/SHARED_ATTRS-org.cytoscape.model.CyNode-35+shared+node.cytable" sourceJoinKey="SUID" targetTable="1162-ColorByPValue/LOCAL_ATTRS-org.cytoscape.model.CyNode-ColorByPValue+default+node.cytable" targetJoinKey="SUID" immutable="false"/>
        <virtualColumn name="Enrichment" sourceColumn="Enrichment" sourceTable="35-From+cyREST/SHARED_ATTRS-org.cytoscape.model.CyNode-35+shared+node.cytable" sourceJoinKey="SUID" targetTable="1162-ColorByPValue/LOCAL_ATTRS-org.cytoscape.model.CyNode-ColorByPValue+default+node.cytable" targetJoinKey="SUID" immutable="false"/>
        <virtualColumn name="Z-score" sourceColumn="Z-score" sourceTable="35-From+cyREST/SHARED_ATTRS-org.cytoscape.model.CyNode-35+shared+node.cytable" sourceJoinKey="SUID" targetTable="1162-ColorByPValue/LOCAL_ATTRS-org.cytoscape.model.CyNode-ColorByPValue+default+node.cytable" targetJoinKey="SUID" immutable="false"/>
        <virtualColumn name="#GeneInGOAndHitList" sourceColumn="#GeneInGOAndHitList" sourceTable="35-From+cyREST/SHARED_ATTRS-org.cytoscape.model.CyNode-35+shared+node.cytable" sourceJoinKey="SUID" targetTable="1162-ColorByPValue/LOCAL_ATTRS-org.cytoscape.model.CyNode-ColorByPValue+default+node.cytable" targetJoinKey="SUID" immutable="false"/>
        <virtualColumn name="#GeneInGO" sourceColumn="#GeneInGO" sourceTable="35-From+cyREST/SHARED_ATTRS-org.cytoscape.model.CyNode-35+shared+node.cytable" sourceJoinKey="SUID" targetTable="1162-ColorByPValue/LOCAL_ATTRS-org.cytoscape.model.CyNode-ColorByPValue+default+node.cytable" targetJoinKey="SUID" immutable="false"/>
        <virtualColumn name="#GeneInHitList" sourceColumn="#GeneInHitList" sourceTable="35-From+cyREST/SHARED_ATTRS-org.cytoscape.model.CyNode-35+shared+node.cytable" sourceJoinKey="SUID" targetTable="1162-ColorByPValue/LOCAL_ATTRS-org.cytoscape.model.CyNode-ColorByPValue+default+node.cytable" targetJoinKey="SUID" immutable="false"/>
        <virtualColumn name="#TotalGeneInLibrary" sourceColumn="#TotalGeneInLibrary" sourceTable="35-From+cyREST/SHARED_ATTRS-org.cytoscape.model.CyNode-35+shared+node.cytable" sourceJoinKey="SUID" targetTable="1162-ColorByPValue/LOCAL_ATTRS-org.cytoscape.model.CyNode-ColorByPValue+default+node.cytable" targetJoinKey="SUID" immutable="false"/>
        <virtualColumn name="%InGO" sourceColumn="%InGO" sourceTable="35-From+cyREST/SHARED_ATTRS-org.cytoscape.model.CyNode-35+shared+node.cytable" sourceJoinKey="SUID" targetTable="1162-ColorByPValue/LOCAL_ATTRS-org.cytoscape.model.CyNode-ColorByPValue+default+node.cytable" targetJoinKey="SUID" immutable="false"/>
        <virtualColumn name="STDV %InGO" sourceColumn="STDV %InGO" sourceTable="35-From+cyREST/SHARED_ATTRS-org.cytoscape.model.CyNode-35+shared+node.cytable" sourceJoinKey="SUID" targetTable="1162-ColorByPValue/LOCAL_ATTRS-org.cytoscape.model.CyNode-ColorByPValue+default+node.cytable" targetJoinKey="SUID" immutable="false"/>
        <virtualColumn name="BestLogPInGroup" sourceColumn="BestLogPInGroup" sourceTable="35-From+cyREST/SHARED_ATTRS-org.cytoscape.model.CyNode-35+shared+node.cytable" sourceJoinKey="SUID" targetTable="1162-ColorByPValue/LOCAL_ATTRS-org.cytoscape.model.CyNode-ColorByPValue+default+node.cytable" targetJoinKey="SUID" immutable="false"/>
        <virtualColumn name="BestEnrichmentInGroup" sourceColumn="BestEnrichmentInGroup" sourceTable="35-From+cyREST/SHARED_ATTRS-org.cytoscape.model.CyNode-35+shared+node.cytable" sourceJoinKey="SUID" targetTable="1162-ColorByPValue/LOCAL_ATTRS-org.cytoscape.model.CyNode-ColorByPValue+default+node.cytable" targetJoinKey="SUID" immutable="false"/>
        <virtualColumn name="FirstInGroupByEnrichment" sourceColumn="FirstInGroupByEnrichment" sourceTable="35-From+cyREST/SHARED_ATTRS-org.cytoscape.model.CyNode-35+shared+node.cytable" sourceJoinKey="SUID" targetTable="1162-ColorByPValue/LOCAL_ATTRS-org.cytoscape.model.CyNode-ColorByPValue+default+node.cytable" targetJoinKey="SUID" immutable="false"/>
        <virtualColumn name="FirstInGroupByLogP" sourceColumn="FirstInGroupByLogP" sourceTable="35-From+cyREST/SHARED_ATTRS-org.cytoscape.model.CyNode-35+shared+node.cytable" sourceJoinKey="SUID" targetTable="1162-ColorByPValue/LOCAL_ATTRS-org.cytoscape.model.CyNode-ColorByPValue+default+node.cytable" targetJoinKey="SUID" immutable="false"/>
        <virtualColumn name="GeneID" sourceColumn="GeneID" sourceTable="35-From+cyREST/SHARED_ATTRS-org.cytoscape.model.CyNode-35+shared+node.cytable" sourceJoinKey="SUID" targetTable="1162-ColorByPValue/LOCAL_ATTRS-org.cytoscape.model.CyNode-ColorByPValue+default+node.cytable" targetJoinKey="SUID" immutable="false"/>
        <virtualColumn name="_RANK_" sourceColumn="_RANK_" sourceTable="35-From+cyREST/SHARED_ATTRS-org.cytoscape.model.CyNode-35+shared+node.cytable" sourceJoinKey="SUID" targetTable="1162-ColorByPValue/LOCAL_ATTRS-org.cytoscape.model.CyNode-ColorByPValue+default+node.cytable" targetJoinKey="SUID" immutable="false"/>
        <virtualColumn name="_PATTERN_" sourceColumn="_PATTERN_" sourceTable="35-From+cyREST/SHARED_ATTRS-org.cytoscape.model.CyNode-35+shared+node.cytable" sourceJoinKey="SUID" targetTable="1162-ColorByPValue/LOCAL_ATTRS-org.cytoscape.model.CyNode-ColorByPValue+default+node.cytable" targetJoinKey="SUID" immutable="false"/>
        <virtualColumn name="CLUSTER_LABEL" sourceColumn="CLUSTER_LABEL" sourceTable="35-From+cyREST/SHARED_ATTRS-org.cytoscape.model.CyNode-35+shared+node.cytable" sourceJoinKey="SUID" targetTable="1162-ColorByPValue/LOCAL_ATTRS-org.cytoscape.model.CyNode-ColorByPValue+default+node.cytable" targetJoinKey="SUID" immutable="false"/>
        <virtualColumn name="#COUNT_001" sourceColumn="#COUNT_001" sourceTable="35-From+cyREST/SHARED_ATTRS-org.cytoscape.model.CyNode-35+shared+node.cytable" sourceJoinKey="SUID" targetTable="1162-ColorByPValue/LOCAL_ATTRS-org.cytoscape.model.CyNode-ColorByPValue+default+node.cytable" targetJoinKey="SUID" immutable="false"/>
        <virtualColumn name="_MEMBER_MyList" sourceColumn="_MEMBER_MyList" sourceTable="35-From+cyREST/SHARED_ATTRS-org.cytoscape.model.CyNode-35+shared+node.cytable" sourceJoinKey="SUID" targetTable="1162-ColorByPValue/LOCAL_ATTRS-org.cytoscape.model.CyNode-ColorByPValue+default+node.cytable" targetJoinKey="SUID" immutable="false"/>
        <virtualColumn name="_LogP_MyList" sourceColumn="_LogP_MyList" sourceTable="35-From+cyREST/SHARED_ATTRS-org.cytoscape.model.CyNode-35+shared+node.cytable" sourceJoinKey="SUID" targetTable="1162-ColorByPValue/LOCAL_ATTRS-org.cytoscape.model.CyNode-ColorByPValue+default+node.cytable" targetJoinKey="SUID" immutable="false"/>
        <virtualColumn name="Gene" sourceColumn="Gene" sourceTable="35-From+cyREST/SHARED_ATTRS-org.cytoscape.model.CyNode-35+shared+node.cytable" sourceJoinKey="SUID" targetTable="1162-ColorByPValue/LOCAL_ATTRS-org.cytoscape.model.CyNode-ColorByPValue+default+node.cytable" targetJoinKey="SUID" immutable="false"/>
        <virtualColumn name="GiniIndex" sourceColumn="GiniIndex" sourceTable="35-From+cyREST/SHARED_ATTRS-org.cytoscape.model.CyNode-35+shared+node.cytable" sourceJoinKey="SUID" targetTable="1162-ColorByPValue/LOCAL_ATTRS-org.cytoscape.model.CyNode-ColorByPValue+default+node.cytable" targetJoinKey="SUID" immutable="false"/>
        <virtualColumn name="CategoryID" sourceColumn="CategoryID" sourceTable="35-From+cyREST/SHARED_ATTRS-org.cytoscape.model.CyNode-35+shared+node.cytable" sourceJoinKey="SUID" targetTable="1162-ColorByPValue/LOCAL_ATTRS-org.cytoscape.model.CyNode-ColorByPValue+default+node.cytable" targetJoinKey="SUID" immutable="false"/>
        <virtualColumn name="PARENT_GO" sourceColumn="PARENT_GO" sourceTable="35-From+cyREST/SHARED_ATTRS-org.cytoscape.model.CyNode-35+shared+node.cytable" sourceJoinKey="SUID" targetTable="1162-ColorByPValue/LOCAL_ATTRS-org.cytoscape.model.CyNode-ColorByPValue+default+node.cytable" targetJoinKey="SUID" immutable="false"/>
        <virtualColumn name="EvidenceCutoff" sourceColumn="EvidenceCutoff" sourceTable="35-From+cyREST/SHARED_ATTRS-org.cytoscape.model.CyNode-35+shared+node.cytable" sourceJoinKey="SUID" targetTable="1162-ColorByPValue/LOCAL_ATTRS-org.cytoscape.model.CyNode-ColorByPValue+default+node.cytable" targetJoinKey="SUID" immutable="false"/>
        <virtualColumn name="id" sourceColumn="id" sourceTable="35-From+cyREST/SHARED_ATTRS-org.cytoscape.model.CyNode-35+shared+node.cytable" sourceJoinKey="SUID" targetTable="1162-ColorByPValue/LOCAL_ATTRS-org.cytoscape.model.CyNode-ColorByPValue+default+node.cytable" targetJoinKey="SUID" immutable="false"/>
        <virtualColumn name="STDV_InGO" sourceColumn="STDV_InGO" sourceTable="35-From+cyREST/SHARED_ATTRS-org.cytoscape.model.CyNode-35+shared+node.cytable" sourceJoinKey="SUID" targetTable="1162-ColorByPValue/LOCAL_ATTRS-org.cytoscape.model.CyNode-ColorByPValue+default+node.cytable" targetJoinKey="SUID" immutable="false"/>
        <virtualColumn name="Log_q_value_" sourceColumn="Log_q_value_" sourceTable="35-From+cyREST/SHARED_ATTRS-org.cytoscape.model.CyNode-35+shared+node.cytable" sourceJoinKey="SUID" targetTable="1162-ColorByPValue/LOCAL_ATTRS-org.cytoscape.model.CyNode-ColorByPValue+default+node.cytable" targetJoinKey="SUID" immutable="false"/>
        <virtualColumn name="Symbol" sourceColumn="Symbol" sourceTable="35-From+cyREST/SHARED_ATTRS-org.cytoscape.model.CyNode-35+shared+node.cytable" sourceJoinKey="SUID" targetTable="1162-ColorByPValue/LOCAL_ATTRS-org.cytoscape.model.CyNode-ColorByPValue+default+node.cytable" targetJoinKey="SUID" immutable="false"/>
        <virtualColumn name="Z_score" sourceColumn="Z_score" sourceTable="35-From+cyREST/SHARED_ATTRS-org.cytoscape.model.CyNode-35+shared+node.cytable" sourceJoinKey="SUID" targetTable="1162-ColorByPValue/LOCAL_ATTRS-org.cytoscape.model.CyNode-ColorByPValue+default+node.cytable" targetJoinKey="SUID" immutable="false"/>
        <virtualColumn name="_InGO" sourceColumn="_InGO" sourceTable="35-From+cyREST/SHARED_ATTRS-org.cytoscape.model.CyNode-35+shared+node.cytable" sourceJoinKey="SUID" targetTable="1162-ColorByPValue/LOCAL_ATTRS-org.cytoscape.model.CyNode-ColorByPValue+default+node.cytable" targetJoinKey="SUID" immutable="false"/>
        <virtualColumn name="shared name" sourceColumn="shared name" sourceTable="35-From+cyREST/SHARED_ATTRS-org.cytoscape.model.CyEdge-35+shared+edge.cytable" sourceJoinKey="SUID" targetTable="35-From+cyREST/LOCAL_ATTRS-org.cytoscape.model.CyEdge-35+default+edge.cytable" targetJoinKey="SUID" immutable="false"/>
        <virtualColumn name="shared interaction" sourceColumn="shared interaction" sourceTable="35-From+cyREST/SHARED_ATTRS-org.cytoscape.model.CyEdge-35+shared+edge.cytable" sourceJoinKey="SUID" targetTable="35-From+cyREST/LOCAL_ATTRS-org.cytoscape.model.CyEdge-35+default+edge.cytable" targetJoinKey="SUID" immutable="false"/>
        <virtualColumn name="Gene_A" sourceColumn="Gene_A" sourceTable="35-From+cyREST/SHARED_ATTRS-org.cytoscape.model.CyEdge-35+shared+edge.cytable" sourceJoinKey="SUID" targetTable="35-From+cyREST/LOCAL_ATTRS-org.cytoscape.model.CyEdge-35+default+edge.cytable" targetJoinKey="SUID" immutable="false"/>
        <virtualColumn name="Name_A" sourceColumn="Name_A" sourceTable="35-From+cyREST/SHARED_ATTRS-org.cytoscape.model.CyEdge-35+shared+edge.cytable" sourceJoinKey="SUID" targetTable="35-From+cyREST/LOCAL_ATTRS-org.cytoscape.model.CyEdge-35+default+edge.cytable" targetJoinKey="SUID" immutable="false"/>
        <virtualColumn name="Gene_B" sourceColumn="Gene_B" sourceTable="35-From+cyREST/SHARED_ATTRS-org.cytoscape.model.CyEdge-35+shared+edge.cytable" sourceJoinKey="SUID" targetTable="35-From+cyREST/LOCAL_ATTRS-org.cytoscape.model.CyEdge-35+default+edge.cytable" targetJoinKey="SUID" immutable="false"/>
        <virtualColumn name="Name_B" sourceColumn="Name_B" sourceTable="35-From+cyREST/SHARED_ATTRS-org.cytoscape.model.CyEdge-35+shared+edge.cytable" sourceJoinKey="SUID" targetTable="35-From+cyREST/LOCAL_ATTRS-org.cytoscape.model.CyEdge-35+default+edge.cytable" targetJoinKey="SUID" immutable="false"/>
        <virtualColumn name="TYPE" sourceColumn="TYPE" sourceTable="35-From+cyREST/SHARED_ATTRS-org.cytoscape.model.CyEdge-35+shared+edge.cytable" sourceJoinKey="SUID" targetTable="35-From+cyREST/LOCAL_ATTRS-org.cytoscape.model.CyEdge-35+default+edge.cytable" targetJoinKey="SUID" immutable="false"/>
        <virtualColumn name="SCORE" sourceColumn="SCORE" sourceTable="35-From+cyREST/SHARED_ATTRS-org.cytoscape.model.CyEdge-35+shared+edge.cytable" sourceJoinKey="SUID" targetTable="35-From+cyREST/LOCAL_ATTRS-org.cytoscape.model.CyEdge-35+default+edge.cytable" targetJoinKey="SUID" immutable="false"/>
        <virtualColumn name="source" sourceColumn="source" sourceTable="35-From+cyREST/SHARED_ATTRS-org.cytoscape.model.CyEdge-35+shared+edge.cytable" sourceJoinKey="SUID" targetTable="35-From+cyREST/LOCAL_ATTRS-org.cytoscape.model.CyEdge-35+default+edge.cytable" targetJoinKey="SUID" immutable="false"/>
        <virtualColumn name="target" sourceColumn="target" sourceTable="35-From+cyREST/SHARED_ATTRS-org.cytoscape.model.CyEdge-35+shared+edge.cytable" sourceJoinKey="SUID" targetTable="35-From+cyREST/LOCAL_ATTRS-org.cytoscape.model.CyEdge-35+default+edge.cytable" targetJoinKey="SUID" immutable="false"/>
        <virtualColumn name="source_original" sourceColumn="source_original" sourceTable="35-From+cyREST/SHARED_ATTRS-org.cytoscape.model.CyEdge-35+shared+edge.cytable" sourceJoinKey="SUID" targetTable="35-From+cyREST/LOCAL_ATTRS-org.cytoscape.model.CyEdge-35+default+edge.cytable" targetJoinKey="SUID" immutable="false"/>
        <virtualColumn name="target_original" sourceColumn="target_original" sourceTable="35-From+cyREST/SHARED_ATTRS-org.cytoscape.model.CyEdge-35+shared+edge.cytable" sourceJoinKey="SUID" targetTable="35-From+cyREST/LOCAL_ATTRS-org.cytoscape.model.CyEdge-35+default+edge.cytable" targetJoinKey="SUID" immutable="false"/>
        <virtualColumn name="shared name" sourceColumn="shared name" sourceTable="35-From+cyREST/SHARED_ATTRS-org.cytoscape.model.CyNode-35+shared+node.cytable" sourceJoinKey="SUID" targetTable="35-From+cyREST/LOCAL_ATTRS-org.cytoscape.model.CyNode-35+default+node.cytable" targetJoinKey="SUID" immutable="false"/>
        <virtualColumn name="canonicalName" sourceColumn="canonicalName" sourceTable="35-From+cyREST/SHARED_ATTRS-org.cytoscape.model.CyNode-35+shared+node.cytable" sourceJoinKey="SUID" targetTable="35-From+cyREST/LOCAL_ATTRS-org.cytoscape.model.CyNode-35+default+node.cytable" targetJoinKey="SUID" immutable="false"/>
        <virtualColumn name="Description" sourceColumn="Description" sourceTable="35-From+cyREST/SHARED_ATTRS-org.cytoscape.model.CyNode-35+shared+node.cytable" sourceJoinKey="SUID" targetTable="35-From+cyREST/LOCAL_ATTRS-org.cytoscape.model.CyNode-35+default+node.cytable" targetJoinKey="SUID" immutable="false"/>
        <virtualColumn name="Category" sourceColumn="Category" sourceTable="35-From+cyREST/SHARED_ATTRS-org.cytoscape.model.CyNode-35+shared+node.cytable" sourceJoinKey="SUID" targetTable="35-From+cyREST/LOCAL_ATTRS-org.cytoscape.model.CyNode-35+default+node.cytable" targetJoinKey="SUID" immutable="false"/>
        <virtualColumn name="LogP" sourceColumn="LogP" sourceTable="35-From+cyREST/SHARED_ATTRS-org.cytoscape.model.CyNode-35+shared+node.cytable" sourceJoinKey="SUID" targetTable="35-From+cyREST/LOCAL_ATTRS-org.cytoscape.model.CyNode-35+default+node.cytable" targetJoinKey="SUID" immutable="false"/>
        <virtualColumn name="Log(q-value)" sourceColumn="Log(q-value)" sourceTable="35-From+cyREST/SHARED_ATTRS-org.cytoscape.model.CyNode-35+shared+node.cytable" sourceJoinKey="SUID" targetTable="35-From+cyREST/LOCAL_ATTRS-org.cytoscape.model.CyNode-35+default+node.cytable" targetJoinKey="SUID" immutable="false"/>
        <virtualColumn name="GROUP_ID" sourceColumn="GROUP_ID" sourceTable="35-From+cyREST/SHARED_ATTRS-org.cytoscape.model.CyNode-35+shared+node.cytable" sourceJoinKey="SUID" targetTable="35-From+cyREST/LOCAL_ATTRS-org.cytoscape.model.CyNode-35+default+node.cytable" targetJoinKey="SUID" immutable="false"/>
        <virtualColumn name="Hits" sourceColumn="Hits" sourceTable="35-From+cyREST/SHARED_ATTRS-org.cytoscape.model.CyNode-35+shared+node.cytable" sourceJoinKey="SUID" targetTable="35-From+cyREST/LOCAL_ATTRS-org.cytoscape.model.CyNode-35+default+node.cytable" targetJoinKey="SUID" immutable="false"/>
        <virtualColumn name="Enrichment" sourceColumn="Enrichment" sourceTable="35-From+cyREST/SHARED_ATTRS-org.cytoscape.model.CyNode-35+shared+node.cytable" sourceJoinKey="SUID" targetTable="35-From+cyREST/LOCAL_ATTRS-org.cytoscape.model.CyNode-35+default+node.cytable" targetJoinKey="SUID" immutable="false"/>
        <virtualColumn name="Z-score" sourceColumn="Z-score" sourceTable="35-From+cyREST/SHARED_ATTRS-org.cytoscape.model.CyNode-35+shared+node.cytable" sourceJoinKey="SUID" targetTable="35-From+cyREST/LOCAL_ATTRS-org.cytoscape.model.CyNode-35+default+node.cytable" targetJoinKey="SUID" immutable="false"/>
        <virtualColumn name="#GeneInGOAndHitList" sourceColumn="#GeneInGOAndHitList" sourceTable="35-From+cyREST/SHARED_ATTRS-org.cytoscape.model.CyNode-35+shared+node.cytable" sourceJoinKey="SUID" targetTable="35-From+cyREST/LOCAL_ATTRS-org.cytoscape.model.CyNode-35+default+node.cytable" targetJoinKey="SUID" immutable="false"/>
        <virtualColumn name="#GeneInGO" sourceColumn="#GeneInGO" sourceTable="35-From+cyREST/SHARED_ATTRS-org.cytoscape.model.CyNode-35+shared+node.cytable" sourceJoinKey="SUID" targetTable="35-From+cyREST/LOCAL_ATTRS-org.cytoscape.model.CyNode-35+default+node.cytable" targetJoinKey="SUID" immutable="false"/>
        <virtualColumn name="#GeneInHitList" sourceColumn="#GeneInHitList" sourceTable="35-From+cyREST/SHARED_ATTRS-org.cytoscape.model.CyNode-35+shared+node.cytable" sourceJoinKey="SUID" targetTable="35-From+cyREST/LOCAL_ATTRS-org.cytoscape.model.CyNode-35+default+node.cytable" targetJoinKey="SUID" immutable="false"/>
        <virtualColumn name="#TotalGeneInLibrary" sourceColumn="#TotalGeneInLibrary" sourceTable="35-From+cyREST/SHARED_ATTRS-org.cytoscape.model.CyNode-35+shared+node.cytable" sourceJoinKey="SUID" targetTable="35-From+cyREST/LOCAL_ATTRS-org.cytoscape.model.CyNode-35+default+node.cytable" targetJoinKey="SUID" immutable="false"/>
        <virtualColumn name="%InGO" sourceColumn="%InGO" sourceTable="35-From+cyREST/SHARED_ATTRS-org.cytoscape.model.CyNode-35+shared+node.cytable" sourceJoinKey="SUID" targetTable="35-From+cyREST/LOCAL_ATTRS-org.cytoscape.model.CyNode-35+default+node.cytable" targetJoinKey="SUID" immutable="false"/>
        <virtualColumn name="STDV %InGO" sourceColumn="STDV %InGO" sourceTable="35-From+cyREST/SHARED_ATTRS-org.cytoscape.model.CyNode-35+shared+node.cytable" sourceJoinKey="SUID" targetTable="35-From+cyREST/LOCAL_ATTRS-org.cytoscape.model.CyNode-35+default+node.cytable" targetJoinKey="SUID" immutable="false"/>
        <virtualColumn name="BestLogPInGroup" sourceColumn="BestLogPInGroup" sourceTable="35-From+cyREST/SHARED_ATTRS-org.cytoscape.model.CyNode-35+shared+node.cytable" sourceJoinKey="SUID" targetTable="35-From+cyREST/LOCAL_ATTRS-org.cytoscape.model.CyNode-35+default+node.cytable" targetJoinKey="SUID" immutable="false"/>
        <virtualColumn name="BestEnrichmentInGroup" sourceColumn="BestEnrichmentInGroup" sourceTable="35-From+cyREST/SHARED_ATTRS-org.cytoscape.model.CyNode-35+shared+node.cytable" sourceJoinKey="SUID" targetTable="35-From+cyREST/LOCAL_ATTRS-org.cytoscape.model.CyNode-35+default+node.cytable" targetJoinKey="SUID" immutable="false"/>
        <virtualColumn name="FirstInGroupByEnrichment" sourceColumn="FirstInGroupByEnrichment" sourceTable="35-From+cyREST/SHARED_ATTRS-org.cytoscape.model.CyNode-35+shared+node.cytable" sourceJoinKey="SUID" targetTable="35-From+cyREST/LOCAL_ATTRS-org.cytoscape.model.CyNode-35+default+node.cytable" targetJoinKey="SUID" immutable="false"/>
        <virtualColumn name="FirstInGroupByLogP" sourceColumn="FirstInGroupByLogP" sourceTable="35-From+cyREST/SHARED_ATTRS-org.cytoscape.model.CyNode-35+shared+node.cytable" sourceJoinKey="SUID" targetTable="35-From+cyREST/LOCAL_ATTRS-org.cytoscape.model.CyNode-35+default+node.cytable" targetJoinKey="SUID" immutable="false"/>
        <virtualColumn name="GeneID" sourceColumn="GeneID" sourceTable="35-From+cyREST/SHARED_ATTRS-org.cytoscape.model.CyNode-35+shared+node.cytable" sourceJoinKey="SUID" targetTable="35-From+cyREST/LOCAL_ATTRS-org.cytoscape.model.CyNode-35+default+node.cytable" targetJoinKey="SUID" immutable="false"/>
        <virtualColumn name="_RANK_" sourceColumn="_RANK_" sourceTable="35-From+cyREST/SHARED_ATTRS-org.cytoscape.model.CyNode-35+shared+node.cytable" sourceJoinKey="SUID" targetTable="35-From+cyREST/LOCAL_ATTRS-org.cytoscape.model.CyNode-35+default+node.cytable" targetJoinKey="SUID" immutable="false"/>
        <virtualColumn name="_PATTERN_" sourceColumn="_PATTERN_" sourceTable="35-From+cyREST/SHARED_ATTRS-org.cytoscape.model.CyNode-35+shared+node.cytable" sourceJoinKey="SUID" targetTable="35-From+cyREST/LOCAL_ATTRS-org.cytoscape.model.CyNode-35+default+node.cytable" targetJoinKey="SUID" immutable="false"/>
        <virtualColumn name="CLUSTER_LABEL" sourceColumn="CLUSTER_LABEL" sourceTable="35-From+cyREST/SHARED_ATTRS-org.cytoscape.model.CyNode-35+shared+node.cytable" sourceJoinKey="SUID" targetTable="35-From+cyREST/LOCAL_ATTRS-org.cytoscape.model.CyNode-35+default+node.cytable" targetJoinKey="SUID" immutable="false"/>
        <virtualColumn name="#COUNT_001" sourceColumn="#COUNT_001" sourceTable="35-From+cyREST/SHARED_ATTRS-org.cytoscape.model.CyNode-35+shared+node.cytable" sourceJoinKey="SUID" targetTable="35-From+cyREST/LOCAL_ATTRS-org.cytoscape.model.CyNode-35+default+node.cytable" targetJoinKey="SUID" immutable="false"/>
        <virtualColumn name="_MEMBER_MyList" sourceColumn="_MEMBER_MyList" sourceTable="35-From+cyREST/SHARED_ATTRS-org.cytoscape.model.CyNode-35+shared+node.cytable" sourceJoinKey="SUID" targetTable="35-From+cyREST/LOCAL_ATTRS-org.cytoscape.model.CyNode-35+default+node.cytable" targetJoinKey="SUID" immutable="false"/>
        <virtualColumn name="_LogP_MyList" sourceColumn="_LogP_MyList" sourceTable="35-From+cyREST/SHARED_ATTRS-org.cytoscape.model.CyNode-35+shared+node.cytable" sourceJoinKey="SUID" targetTable="35-From+cyREST/LOCAL_ATTRS-org.cytoscape.model.CyNode-35+default+node.cytable" targetJoinKey="SUID" immutable="false"/>
        <virtualColumn name="Gene" sourceColumn="Gene" sourceTable="35-From+cyREST/SHARED_ATTRS-org.cytoscape.model.CyNode-35+shared+node.cytable" sourceJoinKey="SUID" targetTable="35-From+cyREST/LOCAL_ATTRS-org.cytoscape.model.CyNode-35+default+node.cytable" targetJoinKey="SUID" immutable="false"/>
        <virtualColumn name="GiniIndex" sourceColumn="GiniIndex" sourceTable="35-From+cyREST/SHARED_ATTRS-org.cytoscape.model.CyNode-35+shared+node.cytable" sourceJoinKey="SUID" targetTable="35-From+cyREST/LOCAL_ATTRS-org.cytoscape.model.CyNode-35+default+node.cytable" targetJoinKey="SUID" immutable="false"/>
        <virtualColumn name="CategoryID" sourceColumn="CategoryID" sourceTable="35-From+cyREST/SHARED_ATTRS-org.cytoscape.model.CyNode-35+shared+node.cytable" sourceJoinKey="SUID" targetTable="35-From+cyREST/LOCAL_ATTRS-org.cytoscape.model.CyNode-35+default+node.cytable" targetJoinKey="SUID" immutable="false"/>
        <virtualColumn name="PARENT_GO" sourceColumn="PARENT_GO" sourceTable="35-From+cyREST/SHARED_ATTRS-org.cytoscape.model.CyNode-35+shared+node.cytable" sourceJoinKey="SUID" targetTable="35-From+cyREST/LOCAL_ATTRS-org.cytoscape.model.CyNode-35+default+node.cytable" targetJoinKey="SUID" immutable="false"/>
        <virtualColumn name="EvidenceCutoff" sourceColumn="EvidenceCutoff" sourceTable="35-From+cyREST/SHARED_ATTRS-org.cytoscape.model.CyNode-35+shared+node.cytable" sourceJoinKey="SUID" targetTable="35-From+cyREST/LOCAL_ATTRS-org.cytoscape.model.CyNode-35+default+node.cytable" targetJoinKey="SUID" immutable="false"/>
        <virtualColumn name="id" sourceColumn="id" sourceTable="35-From+cyREST/SHARED_ATTRS-org.cytoscape.model.CyNode-35+shared+node.cytable" sourceJoinKey="SUID" targetTable="35-From+cyREST/LOCAL_ATTRS-org.cytoscape.model.CyNode-35+default+node.cytable" targetJoinKey="SUID" immutable="false"/>
        <virtualColumn name="STDV_InGO" sourceColumn="STDV_InGO" sourceTable="35-From+cyREST/SHARED_ATTRS-org.cytoscape.model.CyNode-35+shared+node.cytable" sourceJoinKey="SUID" targetTable="35-From+cyREST/LOCAL_ATTRS-org.cytoscape.model.CyNode-35+default+node.cytable" targetJoinKey="SUID" immutable="false"/>
        <virtualColumn name="Log_q_value_" sourceColumn="Log_q_value_" sourceTable="35-From+cyREST/SHARED_ATTRS-org.cytoscape.model.CyNode-35+shared+node.cytable" sourceJoinKey="SUID" targetTable="35-From+cyREST/LOCAL_ATTRS-org.cytoscape.model.CyNode-35+default+node.cytable" targetJoinKey="SUID" immutable="false"/>
        <virtualColumn name="Symbol" sourceColumn="Symbol" sourceTable="35-From+cyREST/SHARED_ATTRS-org.cytoscape.model.CyNode-35+shared+node.cytable" sourceJoinKey="SUID" targetTable="35-From+cyREST/LOCAL_ATTRS-org.cytoscape.model.CyNode-35+default+node.cytable" targetJoinKey="SUID" immutable="false"/>
        <virtualColumn name="Z_score" sourceColumn="Z_score" sourceTable="35-From+cyREST/SHARED_ATTRS-org.cytoscape.model.CyNode-35+shared+node.cytable" sourceJoinKey="SUID" targetTable="35-From+cyREST/LOCAL_ATTRS-org.cytoscape.model.CyNode-35+default+node.cytable" targetJoinKey="SUID" immutable="false"/>
        <virtualColumn name="_InGO" sourceColumn="_InGO" sourceTable="35-From+cyREST/SHARED_ATTRS-org.cytoscape.model.CyNode-35+shared+node.cytable" sourceJoinKey="SUID" targetTable="35-From+cyREST/LOCAL_ATTRS-org.cytoscape.model.CyNode-35+default+node.cytable" targetJoinKey="SUID" immutable="false"/>
        <virtualColumn name="shared name" sourceColumn="shared name" sourceTable="35-From+cyREST/SHARED_ATTRS-org.cytoscape.model.CyNetwork-35+shared+network.cytable" sourceJoinKey="SUID" targetTable="35-From+cyREST/LOCAL_ATTRS-org.cytoscape.model.CyNetwork-35+default+network.cytable" targetJoinKey="SUID" immutable="false"/>
        <virtualColumn name="shared name" sourceColumn="shared name" sourceTable="35-From+cyREST/SHARED_ATTRS-org.cytoscape.model.CyEdge-35+shared+edge.cytable" sourceJoinKey="SUID" targetTable="1162-ColorByPValue/LOCAL_ATTRS-org.cytoscape.model.CyEdge-ColorByPValue+default+edge.cytable" targetJoinKey="SUID" immutable="false"/>
        <virtualColumn name="shared interaction" sourceColumn="shared interaction" sourceTable="35-From+cyREST/SHARED_ATTRS-org.cytoscape.model.CyEdge-35+shared+edge.cytable" sourceJoinKey="SUID" targetTable="1162-ColorByPValue/LOCAL_ATTRS-org.cytoscape.model.CyEdge-ColorByPValue+default+edge.cytable" targetJoinKey="SUID" immutable="false"/>
        <virtualColumn name="Gene_A" sourceColumn="Gene_A" sourceTable="35-From+cyREST/SHARED_ATTRS-org.cytoscape.model.CyEdge-35+shared+edge.cytable" sourceJoinKey="SUID" targetTable="1162-ColorByPValue/LOCAL_ATTRS-org.cytoscape.model.CyEdge-ColorByPValue+default+edge.cytable" targetJoinKey="SUID" immutable="false"/>
        <virtualColumn name="Name_A" sourceColumn="Name_A" sourceTable="35-From+cyREST/SHARED_ATTRS-org.cytoscape.model.CyEdge-35+shared+edge.cytable" sourceJoinKey="SUID" targetTable="1162-ColorByPValue/LOCAL_ATTRS-org.cytoscape.model.CyEdge-ColorByPValue+default+edge.cytable" targetJoinKey="SUID" immutable="false"/>
        <virtualColumn name="Gene_B" sourceColumn="Gene_B" sourceTable="35-From+cyREST/SHARED_ATTRS-org.cytoscape.model.CyEdge-35+shared+edge.cytable" sourceJoinKey="SUID" targetTable="1162-ColorByPValue/LOCAL_ATTRS-org.cytoscape.model.CyEdge-ColorByPValue+default+edge.cytable" targetJoinKey="SUID" immutable="false"/>
        <virtualColumn name="Name_B" sourceColumn="Name_B" sourceTable="35-From+cyREST/SHARED_ATTRS-org.cytoscape.model.CyEdge-35+shared+edge.cytable" sourceJoinKey="SUID" targetTable="1162-ColorByPValue/LOCAL_ATTRS-org.cytoscape.model.CyEdge-ColorByPValue+default+edge.cytable" targetJoinKey="SUID" immutable="false"/>
        <virtualColumn name="TYPE" sourceColumn="TYPE" sourceTable="35-From+cyREST/SHARED_ATTRS-org.cytoscape.model.CyEdge-35+shared+edge.cytable" sourceJoinKey="SUID" targetTable="1162-ColorByPValue/LOCAL_ATTRS-org.cytoscape.model.CyEdge-ColorByPValue+default+edge.cytable" targetJoinKey="SUID" immutable="false"/>
        <virtualColumn name="SCORE" sourceColumn="SCORE" sourceTable="35-From+cyREST/SHARED_ATTRS-org.cytoscape.model.CyEdge-35+shared+edge.cytable" sourceJoinKey="SUID" targetTable="1162-ColorByPValue/LOCAL_ATTRS-org.cytoscape.model.CyEdge-ColorByPValue+default+edge.cytable" targetJoinKey="SUID" immutable="false"/>
        <virtualColumn name="source" sourceColumn="source" sourceTable="35-From+cyREST/SHARED_ATTRS-org.cytoscape.model.CyEdge-35+shared+edge.cytable" sourceJoinKey="SUID" targetTable="1162-ColorByPValue/LOCAL_ATTRS-org.cytoscape.model.CyEdge-ColorByPValue+default+edge.cytable" targetJoinKey="SUID" immutable="false"/>
        <virtualColumn name="target" sourceColumn="target" sourceTable="35-From+cyREST/SHARED_ATTRS-org.cytoscape.model.CyEdge-35+shared+edge.cytable" sourceJoinKey="SUID" targetTable="1162-ColorByPValue/LOCAL_ATTRS-org.cytoscape.model.CyEdge-ColorByPValue+default+edge.cytable" targetJoinKey="SUID" immutable="false"/>
        <virtualColumn name="source_original" sourceColumn="source_original" sourceTable="35-From+cyREST/SHARED_ATTRS-org.cytoscape.model.CyEdge-35+shared+edge.cytable" sourceJoinKey="SUID" targetTable="1162-ColorByPValue/LOCAL_ATTRS-org.cytoscape.model.CyEdge-ColorByPValue+default+edge.cytable" targetJoinKey="SUID" immutable="false"/>
        <virtualColumn name="target_original" sourceColumn="target_original" sourceTable="35-From+cyREST/SHARED_ATTRS-org.cytoscape.model.CyEdge-35+shared+edge.cytable" sourceJoinKey="SUID" targetTable="1162-ColorByPValue/LOCAL_ATTRS-org.cytoscape.model.CyEdge-ColorByPValue+default+edge.cytable" targetJoinKey="SUID" immutable="false"/>
    </virtualColumns>
</cyTables>
