# Supplementary material for: A zebrafish screen reveals Renin-angiotensin system inhibitors as neuroprotective via mitochondrial restoration in dopamine neurons
Source: eLife journal article supplement (doi:10.7554/elife.69795), 2021-09-22
Supplement: fig5-data4 [file elife-69795-fig5-data4-v1.cys › CytoscapeSession-2021_03_12-09_32/views/51-3396-ColorByCluster.xgmml]

<?xml version="1.0" encoding="UTF-8" standalone="yes"?>
<graph id="3396" label="3396" cy:view="1" cy:networkId="51" cy:visualStyle="ColorByCluster" cy:rendererId="org.cytoscape.ding" cy:documentVersion="3.0" xmlns:dc="http://purl.org/dc/elements/1.1/" xmlns:xlink="http://www.w3.org/1999/xlink" xmlns:rdf="http://www.w3.org/1999/02/22-rdf-syntax-ns#" xmlns:cy="http://www.cytoscape.org" xmlns="http://www.cs.rpi.edu/XGMML">
  <graphics>
    <att name="NETWORK_FORCE_HIGH_DETAIL" value="false" type="string" cy:type="String"/>
    <att name="NETWORK_NODE_LABEL_SELECTION" value="false" type="string" cy:type="String"/>
    <att name="NETWORK_CENTER_Z_LOCATION" value="0.0" type="string" cy:type="String"/>
    <att name="NETWORK_CENTER_X_LOCATION" value="420.8950447912796" type="string" cy:type="String"/>
    <att name="NETWORK_HEIGHT" value="269.0" type="string" cy:type="String"/>
    <att name="NETWORK_TITLE" value="" type="string" cy:type="String"/>
    <att name="NETWORK_SCALE_FACTOR" value="0.18390051025071008" type="string" cy:type="String"/>
    <att name="NETWORK_WIDTH" value="791.0" type="string" cy:type="String"/>
    <att name="NETWORK_ANNOTATION_SELECTION" value="false" type="string" cy:type="String"/>
    <att name="NETWORK_EDGE_SELECTION" value="true" type="string" cy:type="String"/>
    <att name="NETWORK_CENTER_Y_LOCATION" value="267.28500594436446" type="string" cy:type="String"/>
    <att name="NETWORK_NODE_SELECTION" value="true" type="string" cy:type="String"/>
    <att name="NETWORK_DEPTH" value="0.0" type="string" cy:type="String"/>
  </graphics>
  <node id="3562" label="4" cy:nodeId="64">
    <graphics z="0.0" x="467.6751274939163" y="-392.66858572026774"/>
  </node>
  <node id="3530" label="36" cy:nodeId="96">
    <graphics z="0.0" x="467.10003899293974" y="652.0895319555136"/>
  </node>
  <node id="3498" label="68" cy:nodeId="128">
    <graphics z="0.0" x="333.6219277258499" y="694.1955500219199"/>
  </node>
  <node id="3466" label="100" cy:nodeId="160">
    <graphics z="0.0" x="-87.37888861936494" y="1205.770058688912"/>
  </node>
  <node id="3434" label="132" cy:nodeId="192">
    <graphics z="0.0" x="185.17878197389678" y="250.7311030004355"/>
  </node>
  <node id="3402" label="164" cy:nodeId="224">
    <graphics z="0.0" x="201.12553690630034" y="1067.9902887914511"/>
  </node>
  <node id="3561" label="5" cy:nodeId="65">
    <graphics z="0.0" x="407.2414116736038" y="-421.52002614995524"/>
  </node>
  <node id="3529" label="37" cy:nodeId="97">
    <graphics z="0.0" x="450.9510521765335" y="-302.2525395776896"/>
  </node>
  <node id="3497" label="69" cy:nodeId="129">
    <graphics z="0.0" x="276.14085243898467" y="620.1722956273886"/>
  </node>
  <node id="3465" label="101" cy:nodeId="161">
    <graphics z="0.0" x="-38.52204657834932" y="1067.9902887914511"/>
  </node>
  <node id="3433" label="133" cy:nodeId="193">
    <graphics z="0.0" x="260.9819664831741" y="325.96154123285737"/>
  </node>
  <node id="3401" label="165" cy:nodeId="225">
    <graphics z="0.0" x="332.38920067506865" y="584.5977717016074"/>
  </node>
  <node id="3560" label="6" cy:nodeId="66">
    <graphics z="0.0" x="346.59581230836943" y="-402.906439724174"/>
  </node>
  <node id="3528" label="38" cy:nodeId="98">
    <graphics z="0.0" x="433.82460259157256" y="-220.98435110112712"/>
  </node>
  <node id="3496" label="70" cy:nodeId="130">
    <graphics z="0.0" x="535.2147393103226" y="-434.1093511011271"/>
  </node>
  <node id="3464" label="102" cy:nodeId="162">
    <graphics z="0.0" x="17.75895928102568" y="1166.937050876412"/>
  </node>
  <node id="3432" label="134" cy:nodeId="194">
    <graphics z="0.0" x="179.64914177614287" y="304.9150934789511"/>
  </node>
  <node id="3400" label="166" cy:nodeId="226">
    <graphics z="0.0" x="343.18311976152495" y="1067.9902887914511"/>
  </node>
  <node id="3559" label="7" cy:nodeId="67">
    <graphics z="0.0" x="370.83949516969756" y="-359.31177419683024"/>
  </node>
  <node id="3527" label="39" cy:nodeId="99">
    <graphics z="0.0" x="395.3658776159866" y="-245.942816677299"/>
  </node>
  <node id="3495" label="71" cy:nodeId="131">
    <graphics z="0.0" x="505.04722832399443" y="-406.02490896245524"/>
  </node>
  <node id="3463" label="103" cy:nodeId="163">
    <graphics z="0.0" x="-124.78391791623994" y="1150.5291834447714"/>
  </node>
  <node id="3431" label="135" cy:nodeId="195">
    <graphics z="0.0" x="257.46662758546904" y="226.126488742623"/>
  </node>
  <node id="3399" label="167" cy:nodeId="227">
    <graphics z="0.0" x="-152.7505316857712" y="450.6194391820761"/>
  </node>
  <node id="3558" label="8" cy:nodeId="68">
    <graphics z="0.0" x="490.7018608923538" y="-468.22278493901774"/>
  </node>
  <node id="3526" label="40" cy:nodeId="100">
    <graphics z="0.0" x="416.14901970583037" y="-320.11199087163493"/>
  </node>
  <node id="3494" label="72" cy:nodeId="132">
    <graphics z="0.0" x="678.8341851111038" y="-322.48894399663493"/>
  </node>
  <node id="3462" label="104" cy:nodeId="164">
    <graphics z="0.0" x="17.880266654072557" y="343.8800592992636"/>
  </node>
  <node id="3430" label="136" cy:nodeId="196">
    <graphics z="0.0" x="243.4201397772415" y="271.411644992623"/>
  </node>
  <node id="3398" label="168" cy:nodeId="228">
    <graphics z="0.0" x="1068.1007866736038" y="-504.58153844138667"/>
  </node>
  <node id="3557" label="9" cy:nodeId="69">
    <graphics z="0.0" x="369.11468743043974" y="-446.77506155034587"/>
  </node>
  <node id="3525" label="41" cy:nodeId="101">
    <graphics z="0.0" x="339.4233956213577" y="-244.30571645757243"/>
  </node>
  <node id="3493" label="73" cy:nodeId="133">
    <graphics z="0.0" x="544.4117607946976" y="-346.14905447026774"/>
  </node>
  <node id="3461" label="105" cy:nodeId="165">
    <graphics z="0.0" x="66.852053153096" y="457.37938791254487"/>
  </node>
  <node id="3429" label="137" cy:nodeId="197">
    <graphics z="0.0" x="200.49298905092314" y="350.9060602758261"/>
  </node>
  <node id="3397" label="169" cy:nodeId="229">
    <graphics z="0.0" x="-28.08222724241182" y="1211.2141810033652"/>
  </node>
  <node id="3556" label="10" cy:nodeId="70">
    <graphics z="0.0" x="1156.2560295935257" y="-536.6755325820117"/>
  </node>
  <node id="3524" label="42" cy:nodeId="102">
    <graphics z="0.0" x="307.55377434450224" y="-306.94890493413493"/>
  </node>
  <node id="3492" label="74" cy:nodeId="134">
    <graphics z="0.0" x="565.4057488318069" y="-387.77554983159587"/>
  </node>
  <node id="3460" label="106" cy:nodeId="166">
    <graphics z="0.0" x="115.65762566286162" y="359.81795602777925"/>
  </node>
  <node id="3428" label="138" cy:nodeId="198">
    <graphics z="0.0" x="322.90763329225615" y="334.2617731664511"/>
  </node>
  <node id="3555" label="11" cy:nodeId="71">
    <graphics z="0.0" x="1106.3656182165726" y="-558.9226639296679"/>
  </node>
  <node id="3523" label="43" cy:nodeId="103">
    <graphics z="0.0" x="304.912241446553" y="-259.8960942651896"/>
  </node>
  <node id="3491" label="75" cy:nodeId="135">
    <graphics z="0.0" x="546.8298821325882" y="-293.88550466558024"/>
  </node>
  <node id="3459" label="107" cy:nodeId="167">
    <graphics z="0.0" x="89.14920281129912" y="305.26781564691987"/>
  </node>
  <node id="3427" label="139" cy:nodeId="199">
    <graphics z="0.0" x="282.6406922216995" y="386.9865046117636"/>
  </node>
  <node id="3554" label="12" cy:nodeId="72">
    <graphics z="0.0" x="1065.8493370886429" y="-629.2541229750781"/>
  </node>
  <node id="3522" label="44" cy:nodeId="104">
    <graphics z="0.0" x="376.1960930700882" y="-208.1396703149943"/>
  </node>
  <node id="3490" label="76" cy:nodeId="136">
    <graphics z="0.0" x="627.4632744665726" y="-310.29459280034587"/>
  </node>
  <node id="3458" label="108" cy:nodeId="168">
    <graphics z="0.0" x="52.254946219502244" y="392.9786921117636"/>
  </node>
  <node id="3426" label="140" cy:nodeId="200">
    <graphics z="0.0" x="333.0943627234085" y="282.31017404535737"/>
  </node>
  <node id="3553" label="13" cy:nodeId="73">
    <graphics z="0.0" x="1188.6795372839554" y="-568.3298370864062"/>
  </node>
  <node id="3521" label="45" cy:nodeId="105">
    <graphics z="0.0" x="362.91441582399443" y="-308.37122243901774"/>
  </node>
  <node id="3489" label="77" cy:nodeId="137">
    <graphics z="0.0" x="502.2384514685257" y="-326.3412846948771"/>
  </node>
  <node id="3457" label="109" cy:nodeId="169">
    <graphics z="0.0" x="47.99899529176787" y="498.70690256098237"/>
  </node>
  <node id="3425" label="141" cy:nodeId="201">
    <graphics z="0.0" x="-328.1143012170212" y="1147.890420017037"/>
  </node>
  <node id="3552" label="14" cy:nodeId="74">
    <graphics z="0.0" x="1142.929918753682" y="-682.9249333765177"/>
  </node>
  <node id="3520" label="46" cy:nodeId="106">
    <graphics z="0.0" x="225.3782069559677" y="-10.798521938529461"/>
  </node>
  <node id="3488" label="78" cy:nodeId="138">
    <graphics z="0.0" x="340.86152933794096" y="1175.7296381566855"/>
  </node>
  <node id="3456" label="110" cy:nodeId="170">
    <graphics z="0.0" x="148.0426049109085" y="462.8611384008261"/>
  </node>
  <node id="3424" label="142" cy:nodeId="202">
    <graphics z="0.0" x="-276.98447943967744" y="1136.1712122533652"/>
  </node>
  <node id="3551" label="15" cy:nodeId="75">
    <graphics z="0.0" x="1224.1299767370804" y="-620.0683777358203"/>
  </node>
  <node id="3519" label="47" cy:nodeId="107">
    <graphics z="0.0" x="179.79086540895537" y="6.294541415962726"/>
  </node>
  <node id="3487" label="79" cy:nodeId="139">
    <graphics z="0.0" x="258.8084320898636" y="835.4914484594199"/>
  </node>
  <node id="3455" label="111" cy:nodeId="171">
    <graphics z="0.0" x="-2.9158606652633807" y="441.92406564691987"/>
  </node>
  <node id="3423" label="143" cy:nodeId="203">
    <graphics z="0.0" x="-351.9718451623337" y="1084.2701807592246"/>
  </node>
  <node id="3550" label="16" cy:nodeId="76">
    <graphics z="0.0" x="1104.9236321325882" y="-604.6924927260546"/>
  </node>
  <node id="3518" label="48" cy:nodeId="108">
    <graphics z="0.0" x="291.23844383913115" y="62.50719552973226"/>
  </node>
  <node id="3486" label="80" cy:nodeId="140">
    <graphics z="0.0" x="303.92990349489287" y="827.8008967016074"/>
  </node>
  <node id="3454" label="112" cy:nodeId="172">
    <graphics z="0.0" x="-13.519574654521193" y="387.34871774652925"/>
  </node>
  <node id="3422" label="144" cy:nodeId="204">
    <graphics z="0.0" x="-224.78391791623994" y="1153.204873142037"/>
  </node>
  <node id="3549" label="17" cy:nodeId="77">
    <graphics z="0.0" x="1198.1247887487991" y="-675.0878183867602"/>
  </node>
  <node id="3517" label="49" cy:nodeId="109">
    <graphics z="0.0" x="232.76572273927763" y="52.44121652582601"/>
  </node>
  <node id="3485" label="81" cy:nodeId="141">
    <graphics z="0.0" x="238.16061638551787" y="773.8132258031699"/>
  </node>
  <node id="3453" label="113" cy:nodeId="173">
    <graphics z="0.0" x="509.7761711950882" y="876.7703180883261"/>
  </node>
  <node id="3421" label="145" cy:nodeId="205">
    <graphics z="0.0" x="-382.3398871545212" y="1134.7952814672324"/>
  </node>
  <node id="3548" label="18" cy:nodeId="78">
    <graphics z="0.0" x="1090.1880593176468" y="-672.4182474639086"/>
  </node>
  <node id="3516" label="50" cy:nodeId="110">
    <graphics z="0.0" x="206.10784767824248" y="149.65116220453694"/>
  </node>
  <node id="3484" label="82" cy:nodeId="142">
    <graphics z="0.0" x="295.81540154176787" y="778.9478693578574"/>
  </node>
  <node id="3452" label="114" cy:nodeId="174">
    <graphics z="0.0" x="635.2943901892288" y="920.7733698461386"/>
  </node>
  <node id="3420" label="146" cy:nodeId="206">
    <graphics z="0.0" x="-245.6621527795212" y="1089.5314417455527"/>
  </node>
  <node id="3547" label="19" cy:nodeId="79">
    <graphics z="0.0" x="-136.0174994592087" y="589.0077448461386"/>
  </node>
  <node id="3515" label="51" cy:nodeId="111">
    <graphics z="0.0" x="246.12249993043974" y="147.91506296137288"/>
  </node>
  <node id="3483" label="83" cy:nodeId="143">
    <graphics z="0.0" x="336.3706536169632" y="731.3180475805136"/>
  </node>
  <node id="3451" label="115" cy:nodeId="175">
    <graphics z="0.0" x="655.1965203161819" y="855.5731134984824"/>
  </node>
  <node id="3419" label="147" cy:nodeId="207">
    <graphics z="0.0" x="-299.63792182248994" y="1067.9902887914511"/>
  </node>
  <node id="3546" label="20" cy:nodeId="80">
    <graphics z="0.0" x="-220.28370429319307" y="526.7330256078574"/>
  </node>
  <node id="3514" label="52" cy:nodeId="112">
    <graphics z="0.0" x="163.75364540773467" y="136.84041696527913"/>
  </node>
  <node id="3482" label="84" cy:nodeId="144">
    <graphics z="0.0" x="201.2173752661331" y="709.8663263891074"/>
  </node>
  <node id="3450" label="116" cy:nodeId="176">
    <graphics z="0.0" x="775.1229424353226" y="915.1113825414511"/>
  </node>
  <node id="3418" label="148" cy:nodeId="208">
    <graphics z="0.0" x="-362.3126654748337" y="1195.2439585302207"/>
  </node>
  <node id="3545" label="21" cy:nodeId="81">
    <graphics z="0.0" x="-218.4454779748337" y="462.9733210180136"/>
  </node>
  <node id="3513" label="53" cy:nodeId="113">
    <graphics z="0.0" x="154.8189949865921" y="62.71422677973226"/>
  </node>
  <node id="3481" label="85" cy:nodeId="145">
    <graphics z="0.0" x="365.3853325720413" y="810.3270197484824"/>
  </node>
  <node id="3449" label="117" cy:nodeId="177">
    <graphics z="0.0" x="744.5807671423538" y="846.0514460180136"/>
  </node>
  <node id="3417" label="149" cy:nodeId="209">
    <graphics z="0.0" x="-258.18699408811494" y="1203.096085605416"/>
  </node>
  <node id="3544" label="22" cy:nodeId="82">
    <graphics z="0.0" x="-178.78901435178682" y="494.6361628148886"/>
  </node>
  <node id="3512" label="54" cy:nodeId="114">
    <graphics z="0.0" x="276.88988732057646" y="12.117089328560382"/>
  </node>
  <node id="3480" label="86" cy:nodeId="146">
    <graphics z="0.0" x="198.5575566168411" y="657.8371515844199"/>
  </node>
  <node id="3448" label="118" cy:nodeId="178">
    <graphics z="0.0" x="718.6759819861038" y="967.9902887914511"/>
  </node>
  <node id="3416" label="150" cy:nodeId="210">
    <graphics z="0.0" x="423.57506035524443" y="-475.44388479253337"/>
  </node>
  <node id="3543" label="23" cy:nodeId="83">
    <graphics z="0.0" x="-78.25654364866182" y="476.0745173070761"/>
  </node>
  <node id="3511" label="55" cy:nodeId="115">
    <graphics z="0.0" x="474.5823235388382" y="525.8043757055136"/>
  </node>
  <node id="3479" label="87" cy:nodeId="147">
    <graphics z="0.0" x="1046.5055336828812" y="-572.9326660658984"/>
  </node>
  <node id="3447" label="119" cy:nodeId="179">
    <graphics z="0.0" x="-382.3398871545212" y="438.38085275629487"/>
  </node>
  <node id="3415" label="151" cy:nodeId="211">
    <graphics z="0.0" x="310.51525353151396" y="-129.36667150517985"/>
  </node>
  <node id="3542" label="24" cy:nodeId="84">
    <graphics z="0.0" x="-186.60572577756807" y="575.1444635961386"/>
  </node>
  <node id="3510" label="56" cy:nodeId="116">
    <graphics z="0.0" x="446.045900809346" y="505.88182931879487"/>
  </node>
  <node id="3478" label="88" cy:nodeId="148">
    <graphics z="0.0" x="975.9183316107376" y="-611.1368134047656"/>
  </node>
  <node id="3446" label="120" cy:nodeId="180">
    <graphics z="0.0" x="-343.18589545530244" y="403.28673654535737"/>
  </node>
  <node id="3414" label="152" cy:nodeId="212">
    <graphics z="0.0" x="-310.3937201623337" y="383.9586420629355"/>
  </node>
  <node id="3541" label="25" cy:nodeId="85">
    <graphics z="0.0" x="-125.86008979123994" y="423.2510309789511"/>
  </node>
  <node id="3509" label="57" cy:nodeId="117">
    <graphics z="0.0" x="541.269548880635" y="563.2543268773886"/>
  </node>
  <node id="3477" label="89" cy:nodeId="149">
    <graphics z="0.0" x="1007.7035775061233" y="-502.9012253310351"/>
  </node>
  <node id="3445" label="121" cy:nodeId="181">
    <graphics z="0.0" x="-280.39405585569307" y="432.90819650629487"/>
  </node>
  <node id="3413" label="153" cy:nodeId="213">
    <graphics z="0.0" x="384.50030754762724" y="-518.3269109155802"/>
  </node>
  <node id="3540" label="26" cy:nodeId="86">
    <graphics z="0.0" x="-113.92469550413057" y="529.3167658422324"/>
  </node>
  <node id="3508" label="58" cy:nodeId="118">
    <graphics z="0.0" x="510.20872734743193" y="630.7720270727011"/>
  </node>
  <node id="3476" label="90" cy:nodeId="150">
    <graphics z="0.0" x="954.5860381003006" y="-467.5083267714648"/>
  </node>
  <node id="3444" label="122" cy:nodeId="182">
    <graphics z="0.0" x="-332.8485541467087" y="481.28112131098237"/>
  </node>
  <node id="3412" label="154" cy:nodeId="214">
    <graphics z="0.0" x="619.63600395876" y="-380.9023198511271"/>
  </node>
  <node id="3539" label="27" cy:nodeId="87">
    <graphics z="0.0" x="-55.46845771116182" y="556.8707819555136"/>
  </node>
  <node id="3507" label="59" cy:nodeId="119">
    <graphics z="0.0" x="408.25641106325224" y="473.3582087133261"/>
  </node>
  <node id="3475" label="91" cy:nodeId="151">
    <graphics z="0.0" x="919.9553437109573" y="-561.3653976943164"/>
  </node>
  <node id="3443" label="123" cy:nodeId="183">
    <graphics z="0.0" x="-274.9478278283493" y="477.0950251195761"/>
  </node>
  <node id="3411" label="155" cy:nodeId="215">
    <graphics z="0.0" x="1157.593248831807" y="-615.250575306621"/>
  </node>
  <node id="3538" label="28" cy:nodeId="88">
    <graphics z="0.0" x="408.60223625856474" y="631.0482721898886"/>
  </node>
  <node id="3506" label="60" cy:nodeId="120">
    <graphics z="0.0" x="557.3463921423538" y="625.4485407445761"/>
  </node>
  <node id="3474" label="92" cy:nodeId="152">
    <graphics z="0.0" x="875.1229424353226" y="-508.6448318984179"/>
  </node>
  <node id="3442" label="124" cy:nodeId="184">
    <graphics z="0.0" x="-243.86362983030244" y="400.5091791723105"/>
  </node>
  <node id="3410" label="156" cy:nodeId="216">
    <graphics z="0.0" x="109.91041039186553" y="414.06722360590425"/>
  </node>
  <node id="3537" label="29" cy:nodeId="89">
    <graphics z="0.0" x="385.5565209265335" y="552.8050470922324"/>
  </node>
  <node id="3505" label="61" cy:nodeId="121">
    <graphics z="0.0" x="295.95126579958037" y="599.3746882055136"/>
  </node>
  <node id="3473" label="93" cy:nodeId="153">
    <graphics z="0.0" x="985.0168766852005" y="-559.875933888164"/>
  </node>
  <node id="3441" label="125" cy:nodeId="185">
    <graphics z="0.0" x="-178.05543280881807" y="379.1663141820761"/>
  </node>
  <node id="3409" label="157" cy:nodeId="217">
    <graphics z="0.0" x="476.78830193239287" y="596.1332941625449"/>
  </node>
  <node id="3536" label="30" cy:nodeId="90">
    <graphics z="0.0" x="378.4951500769241" y="607.5135431859824"/>
  </node>
  <node id="3504" label="62" cy:nodeId="122">
    <graphics z="0.0" x="184.66185997682646" y="596.0380182836386"/>
  </node>
  <node id="3472" label="94" cy:nodeId="154">
    <graphics z="0.0" x="435.09649895387724" y="-630.901312771049"/>
  </node>
  <node id="3440" label="126" cy:nodeId="186">
    <graphics z="0.0" x="-310.1677680138962" y="524.1090021703574"/>
  </node>
  <node id="3408" label="158" cy:nodeId="218">
    <graphics z="0.0" x="543.8387322302444" y="808.0626154516074"/>
  </node>
  <node id="3535" label="31" cy:nodeId="91">
    <graphics z="0.0" x="427.981447684346" y="631.8095636937949"/>
  </node>
  <node id="3503" label="63" cy:nodeId="123">
    <graphics z="0.0" x="296.1910424109085" y="643.8398981664511"/>
  </node>
  <node id="3471" label="95" cy:nodeId="155">
    <graphics z="0.0" x="315.4030556555374" y="-615.9274968530802"/>
  </node>
  <node id="3439" label="127" cy:nodeId="187">
    <graphics z="0.0" x="-267.5032172326462" y="347.970971164498"/>
  </node>
  <node id="3407" label="159" cy:nodeId="219">
    <graphics z="0.0" x="287.40323876100615" y="667.5949640844199"/>
  </node>
  <node id="3534" label="32" cy:nodeId="92">
    <graphics z="0.0" x="356.29872368532256" y="621.3816462133261"/>
  </node>
  <node id="3502" label="64" cy:nodeId="124">
    <graphics z="0.0" x="273.66808556276396" y="585.0070734594199"/>
  </node>
  <node id="3470" label="96" cy:nodeId="156">
    <graphics z="0.0" x="368.88852165895537" y="-682.9249333765177"/>
  </node>
  <node id="3438" label="128" cy:nodeId="188">
    <graphics z="0.0" x="117.75895928102568" y="1166.8634310338828"/>
  </node>
  <node id="3406" label="160" cy:nodeId="220">
    <graphics z="0.0" x="494.14549492555693" y="-364.82385915776774"/>
  </node>
  <node id="3565" label="1" cy:nodeId="61">
    <graphics z="0.0" x="410.17254875856474" y="-361.9953374292521"/>
  </node>
  <node id="3533" label="33" cy:nodeId="93">
    <graphics z="0.0" x="330.3461708899124" y="542.6003962133261"/>
  </node>
  <node id="3501" label="65" cy:nodeId="125">
    <graphics z="0.0" x="251.1637806768997" y="656.7611628148886"/>
  </node>
  <node id="3469" label="97" cy:nodeId="157">
    <graphics z="0.0" x="-102.1631293420212" y="1087.3620539281699"/>
  </node>
  <node id="3437" label="129" cy:nodeId="189">
    <graphics z="0.0" x="190.57908152299956" y="1194.7114153478476"/>
  </node>
  <node id="3405" label="161" cy:nodeId="221">
    <graphics z="0.0" x="-310.29246283811494" y="1216.82827859858"/>
  </node>
  <node id="3564" label="2" cy:nodeId="62">
    <graphics z="0.0" x="435.31588982301787" y="-348.69132131597087"/>
  </node>
  <node id="3532" label="34" cy:nodeId="94">
    <graphics z="0.0" x="326.69488762575224" y="505.5507135961386"/>
  </node>
  <node id="3500" label="66" cy:nodeId="126">
    <graphics z="0.0" x="255.14358757692412" y="700.4867487523886"/>
  </node>
  <node id="3468" label="98" cy:nodeId="158">
    <graphics z="0.0" x="14.993547904072557" y="1107.4882593725058"/>
  </node>
  <node id="3436" label="130" cy:nodeId="190">
    <graphics z="0.0" x="122.81687639909819" y="1086.5587549779746"/>
  </node>
  <node id="3404" label="162" cy:nodeId="222">
    <graphics z="0.0" x="234.55670021730498" y="634.2977839086386"/>
  </node>
  <node id="3563" label="3" cy:nodeId="63">
    <graphics z="0.0" x="455.01397942262724" y="-444.666205349174"/>
  </node>
  <node id="3531" label="35" cy:nodeId="95">
    <graphics z="0.0" x="427.0392327185257" y="599.6093073461386"/>
  </node>
  <node id="3499" label="67" cy:nodeId="127">
    <graphics z="0.0" x="358.67067192751006" y="673.3465509984824"/>
  </node>
  <node id="3467" label="99" cy:nodeId="159">
    <graphics z="0.0" x="-53.66996527952119" y="1138.5430994603964"/>
  </node>
  <node id="3435" label="131" cy:nodeId="191">
    <graphics z="0.0" x="240.86152933794096" y="1135.0439444158408"/>
  </node>
  <node id="3403" label="163" cy:nodeId="223">
    <graphics z="0.0" x="301.94748161989287" y="236.753197726998"/>
  </node>
</graph>
