# Supplementary material for: A zebrafish screen reveals Renin-angiotensin system inhibitors as neuroprotective via mitochondrial restoration in dopamine neurons
Source: eLife journal article supplement (doi:10.7554/elife.69795), 2021-09-22
Supplement: fig5-data4 [file elife-69795-fig5-data4-v1.cys › CytoscapeSession-2021_03_12-09_32/views/1162-2294-ColorByPValue.xgmml]

<?xml version="1.0" encoding="UTF-8" standalone="yes"?>
<graph id="2294" label="2294" cy:view="1" cy:networkId="1162" cy:visualStyle="ColorByPValue" cy:rendererId="org.cytoscape.ding" cy:documentVersion="3.0" xmlns:dc="http://purl.org/dc/elements/1.1/" xmlns:xlink="http://www.w3.org/1999/xlink" xmlns:rdf="http://www.w3.org/1999/02/22-rdf-syntax-ns#" xmlns:cy="http://www.cytoscape.org" xmlns="http://www.cs.rpi.edu/XGMML">
  <graphics>
    <att name="NETWORK_FORCE_HIGH_DETAIL" value="false" type="string" cy:type="String"/>
    <att name="NETWORK_NODE_LABEL_SELECTION" value="false" type="string" cy:type="String"/>
    <att name="NETWORK_CENTER_Z_LOCATION" value="0.0" type="string" cy:type="String"/>
    <att name="NETWORK_CENTER_X_LOCATION" value="762.1156955232659" type="string" cy:type="String"/>
    <att name="NETWORK_HEIGHT" value="269.0" type="string" cy:type="String"/>
    <att name="NETWORK_TITLE" value="" type="string" cy:type="String"/>
    <att name="NETWORK_SCALE_FACTOR" value="0.2279132399112847" type="string" cy:type="String"/>
    <att name="NETWORK_WIDTH" value="791.0" type="string" cy:type="String"/>
    <att name="NETWORK_ANNOTATION_SELECTION" value="false" type="string" cy:type="String"/>
    <att name="NETWORK_EDGE_SELECTION" value="true" type="string" cy:type="String"/>
    <att name="NETWORK_CENTER_Y_LOCATION" value="22.237238192324924" type="string" cy:type="String"/>
    <att name="NETWORK_NODE_SELECTION" value="true" type="string" cy:type="String"/>
    <att name="NETWORK_DEPTH" value="0.0" type="string" cy:type="String"/>
  </graphics>
  <node id="2451" label="13" cy:nodeId="1184">
    <graphics z="0.0" x="476.78830193239287" y="596.1332941625449"/>
  </node>
  <node id="2419" label="45" cy:nodeId="1216">
    <graphics z="0.0" x="-178.05543280881807" y="379.1663141820761"/>
  </node>
  <node id="2355" label="109" cy:nodeId="1280">
    <graphics z="0.0" x="295.95126579958037" y="599.3746882055136"/>
  </node>
  <node id="2323" label="141" cy:nodeId="1312">
    <graphics z="0.0" x="385.5565209265335" y="552.8050470922324"/>
  </node>
  <node id="2450" label="14" cy:nodeId="1185">
    <graphics z="0.0" x="109.91041039186553" y="414.06722360590425"/>
  </node>
  <node id="2418" label="46" cy:nodeId="1217">
    <graphics z="0.0" x="-243.86362983030244" y="400.5091791723105"/>
  </node>
  <node id="2354" label="110" cy:nodeId="1281">
    <graphics z="0.0" x="557.3463921423538" y="625.4485407445761"/>
  </node>
  <node id="2322" label="142" cy:nodeId="1313">
    <graphics z="0.0" x="408.60223625856474" y="631.0482721898886"/>
  </node>
  <node id="2417" label="47" cy:nodeId="1218">
    <graphics z="0.0" x="-274.9478278283493" y="477.0950251195761"/>
  </node>
  <node id="2353" label="111" cy:nodeId="1282">
    <graphics z="0.0" x="408.25641106325224" y="473.3582087133261"/>
  </node>
  <node id="2321" label="143" cy:nodeId="1314">
    <graphics z="0.0" x="-55.46845771116182" y="556.8707819555136"/>
  </node>
  <node id="2448" label="16" cy:nodeId="1187">
    <graphics z="0.0" x="619.63600395876" y="-380.9023198511271"/>
  </node>
  <node id="2416" label="48" cy:nodeId="1219">
    <graphics z="0.0" x="-332.8485541467087" y="481.28112131098237"/>
  </node>
  <node id="2352" label="112" cy:nodeId="1283">
    <graphics z="0.0" x="510.20872734743193" y="630.7720270727011"/>
  </node>
  <node id="2320" label="144" cy:nodeId="1315">
    <graphics z="0.0" x="-113.92469550413057" y="529.3167658422324"/>
  </node>
  <node id="2447" label="17" cy:nodeId="1188">
    <graphics z="0.0" x="384.50030754762724" y="-518.3269109155802"/>
  </node>
  <node id="2415" label="49" cy:nodeId="1220">
    <graphics z="0.0" x="-280.39405585569307" y="432.90819650629487"/>
  </node>
  <node id="2351" label="113" cy:nodeId="1284">
    <graphics z="0.0" x="541.269548880635" y="563.2543268773886"/>
  </node>
  <node id="2319" label="145" cy:nodeId="1316">
    <graphics z="0.0" x="-125.86008979123994" y="423.2510309789511"/>
  </node>
  <node id="2446" label="18" cy:nodeId="1189">
    <graphics z="0.0" x="-310.3937201623337" y="383.9586420629355"/>
  </node>
  <node id="2414" label="50" cy:nodeId="1221">
    <graphics z="0.0" x="-343.18589545530244" y="403.28673654535737"/>
  </node>
  <node id="2350" label="114" cy:nodeId="1285">
    <graphics z="0.0" x="446.045900809346" y="505.88182931879487"/>
  </node>
  <node id="2318" label="146" cy:nodeId="1317">
    <graphics z="0.0" x="-186.60572577756807" y="575.1444635961386"/>
  </node>
  <node id="2445" label="19" cy:nodeId="1190">
    <graphics z="0.0" x="310.51525353151396" y="-129.36667150517985"/>
  </node>
  <node id="2413" label="51" cy:nodeId="1222">
    <graphics z="0.0" x="-382.3398871545212" y="438.38085275629487"/>
  </node>
  <node id="2349" label="115" cy:nodeId="1286">
    <graphics z="0.0" x="474.5823235388382" y="525.8043757055136"/>
  </node>
  <node id="2317" label="147" cy:nodeId="1318">
    <graphics z="0.0" x="-78.25654364866182" y="476.0745173070761"/>
  </node>
  <node id="2444" label="20" cy:nodeId="1191">
    <graphics z="0.0" x="423.57506035524443" y="-475.44388479253337"/>
  </node>
  <node id="2412" label="52" cy:nodeId="1223">
    <graphics z="0.0" x="718.6759819861038" y="967.9902887914511"/>
  </node>
  <node id="2380" label="84" cy:nodeId="1255">
    <graphics z="0.0" x="198.5575566168411" y="657.8371515844199"/>
  </node>
  <node id="2348" label="116" cy:nodeId="1287">
    <graphics z="0.0" x="276.88988732057646" y="12.117089328560382"/>
  </node>
  <node id="2316" label="148" cy:nodeId="1319">
    <graphics z="0.0" x="-178.78901435178682" y="494.6361628148886"/>
  </node>
  <node id="2411" label="53" cy:nodeId="1224">
    <graphics z="0.0" x="744.5807671423538" y="846.0514460180136"/>
  </node>
  <node id="2379" label="85" cy:nodeId="1256">
    <graphics z="0.0" x="365.3853325720413" y="810.3270197484824"/>
  </node>
  <node id="2347" label="117" cy:nodeId="1288">
    <graphics z="0.0" x="154.8189949865921" y="62.71422677973226"/>
  </node>
  <node id="2315" label="149" cy:nodeId="1320">
    <graphics z="0.0" x="-218.4454779748337" y="462.9733210180136"/>
  </node>
  <node id="2410" label="54" cy:nodeId="1225">
    <graphics z="0.0" x="775.1229424353226" y="915.1113825414511"/>
  </node>
  <node id="2378" label="86" cy:nodeId="1257">
    <graphics z="0.0" x="201.2173752661331" y="709.8663263891074"/>
  </node>
  <node id="2346" label="118" cy:nodeId="1289">
    <graphics z="0.0" x="163.75364540773467" y="136.84041696527913"/>
  </node>
  <node id="2314" label="150" cy:nodeId="1321">
    <graphics z="0.0" x="-220.28370429319307" y="526.7330256078574"/>
  </node>
  <node id="2409" label="55" cy:nodeId="1226">
    <graphics z="0.0" x="655.1965203161819" y="855.5731134984824"/>
  </node>
  <node id="2377" label="87" cy:nodeId="1258">
    <graphics z="0.0" x="336.3706536169632" y="731.3180475805136"/>
  </node>
  <node id="2345" label="119" cy:nodeId="1290">
    <graphics z="0.0" x="246.12249993043974" y="147.91506296137288"/>
  </node>
  <node id="2313" label="151" cy:nodeId="1322">
    <graphics z="0.0" x="-136.0174994592087" y="589.0077448461386"/>
  </node>
  <node id="2408" label="56" cy:nodeId="1227">
    <graphics z="0.0" x="635.2943901892288" y="920.7733698461386"/>
  </node>
  <node id="2376" label="88" cy:nodeId="1259">
    <graphics z="0.0" x="295.81540154176787" y="778.9478693578574"/>
  </node>
  <node id="2344" label="120" cy:nodeId="1291">
    <graphics z="0.0" x="206.10784767824248" y="149.65116220453694"/>
  </node>
  <node id="2407" label="57" cy:nodeId="1228">
    <graphics z="0.0" x="509.7761711950882" y="876.7703180883261"/>
  </node>
  <node id="2375" label="89" cy:nodeId="1260">
    <graphics z="0.0" x="238.16061638551787" y="773.8132258031699"/>
  </node>
  <node id="2343" label="121" cy:nodeId="1292">
    <graphics z="0.0" x="232.76572273927763" y="52.44121652582601"/>
  </node>
  <node id="2406" label="58" cy:nodeId="1229">
    <graphics z="0.0" x="-13.519574654521193" y="387.34871774652925"/>
  </node>
  <node id="2374" label="90" cy:nodeId="1261">
    <graphics z="0.0" x="303.92990349489287" y="827.8008967016074"/>
  </node>
  <node id="2342" label="122" cy:nodeId="1293">
    <graphics z="0.0" x="291.23844383913115" y="62.50719552973226"/>
  </node>
  <node id="2405" label="59" cy:nodeId="1230">
    <graphics z="0.0" x="-2.9158606652633807" y="441.92406564691987"/>
  </node>
  <node id="2373" label="91" cy:nodeId="1262">
    <graphics z="0.0" x="258.8084320898636" y="835.4914484594199"/>
  </node>
  <node id="2341" label="123" cy:nodeId="1294">
    <graphics z="0.0" x="179.79086540895537" y="6.294541415962726"/>
  </node>
  <node id="2404" label="60" cy:nodeId="1231">
    <graphics z="0.0" x="148.0426049109085" y="462.8611384008261"/>
  </node>
  <node id="2340" label="124" cy:nodeId="1295">
    <graphics z="0.0" x="225.3782069559677" y="-10.798521938529461"/>
  </node>
  <node id="2403" label="61" cy:nodeId="1232">
    <graphics z="0.0" x="47.99899529176787" y="498.70690256098237"/>
  </node>
  <node id="2371" label="93" cy:nodeId="1264">
    <graphics z="0.0" x="502.2384514685257" y="-326.3412846948771"/>
  </node>
  <node id="2339" label="125" cy:nodeId="1296">
    <graphics z="0.0" x="362.91441582399443" y="-308.37122243901774"/>
  </node>
  <node id="2434" label="30" cy:nodeId="1201">
    <graphics z="0.0" x="333.0943627234085" y="282.31017404535737"/>
  </node>
  <node id="2402" label="62" cy:nodeId="1233">
    <graphics z="0.0" x="52.254946219502244" y="392.9786921117636"/>
  </node>
  <node id="2370" label="94" cy:nodeId="1265">
    <graphics z="0.0" x="627.4632744665726" y="-310.29459280034587"/>
  </node>
  <node id="2338" label="126" cy:nodeId="1297">
    <graphics z="0.0" x="376.1960930700882" y="-208.1396703149943"/>
  </node>
  <node id="2433" label="31" cy:nodeId="1202">
    <graphics z="0.0" x="282.6406922216995" y="386.9865046117636"/>
  </node>
  <node id="2401" label="63" cy:nodeId="1234">
    <graphics z="0.0" x="89.14920281129912" y="305.26781564691987"/>
  </node>
  <node id="2369" label="95" cy:nodeId="1266">
    <graphics z="0.0" x="546.8298821325882" y="-293.88550466558024"/>
  </node>
  <node id="2337" label="127" cy:nodeId="1298">
    <graphics z="0.0" x="304.912241446553" y="-259.8960942651896"/>
  </node>
  <node id="2432" label="32" cy:nodeId="1203">
    <graphics z="0.0" x="322.90763329225615" y="334.2617731664511"/>
  </node>
  <node id="2400" label="64" cy:nodeId="1235">
    <graphics z="0.0" x="115.65762566286162" y="359.81795602777925"/>
  </node>
  <node id="2368" label="96" cy:nodeId="1267">
    <graphics z="0.0" x="565.4057488318069" y="-387.77554983159587"/>
  </node>
  <node id="2336" label="128" cy:nodeId="1299">
    <graphics z="0.0" x="307.55377434450224" y="-306.94890493413493"/>
  </node>
  <node id="2431" label="33" cy:nodeId="1204">
    <graphics z="0.0" x="200.49298905092314" y="350.9060602758261"/>
  </node>
  <node id="2399" label="65" cy:nodeId="1236">
    <graphics z="0.0" x="66.852053153096" y="457.37938791254487"/>
  </node>
  <node id="2367" label="97" cy:nodeId="1268">
    <graphics z="0.0" x="544.4117607946976" y="-346.14905447026774"/>
  </node>
  <node id="2335" label="129" cy:nodeId="1300">
    <graphics z="0.0" x="339.4233956213577" y="-244.30571645757243"/>
  </node>
  <node id="2303" label="161" cy:nodeId="1332">
    <graphics z="0.0" x="369.11468743043974" y="-446.77506155034587"/>
  </node>
  <node id="2430" label="34" cy:nodeId="1205">
    <graphics z="0.0" x="243.4201397772415" y="271.411644992623"/>
  </node>
  <node id="2398" label="66" cy:nodeId="1237">
    <graphics z="0.0" x="17.880266654072557" y="343.8800592992636"/>
  </node>
  <node id="2366" label="98" cy:nodeId="1269">
    <graphics z="0.0" x="678.8341851111038" y="-322.48894399663493"/>
  </node>
  <node id="2334" label="130" cy:nodeId="1301">
    <graphics z="0.0" x="416.14901970583037" y="-320.11199087163493"/>
  </node>
  <node id="2302" label="162" cy:nodeId="1333">
    <graphics z="0.0" x="490.7018608923538" y="-468.22278493901774"/>
  </node>
  <node id="2461" label="3" cy:nodeId="1174">
    <graphics z="0.0" x="-152.7505316857712" y="450.6194391820761"/>
  </node>
  <node id="2429" label="35" cy:nodeId="1206">
    <graphics z="0.0" x="257.46662758546904" y="226.126488742623"/>
  </node>
  <node id="2365" label="99" cy:nodeId="1270">
    <graphics z="0.0" x="505.04722832399443" y="-406.02490896245524"/>
  </node>
  <node id="2333" label="131" cy:nodeId="1302">
    <graphics z="0.0" x="395.3658776159866" y="-245.942816677299"/>
  </node>
  <node id="2301" label="163" cy:nodeId="1334">
    <graphics z="0.0" x="370.83949516969756" y="-361.04440026337005"/>
  </node>
  <node id="2428" label="36" cy:nodeId="1207">
    <graphics z="0.0" x="179.64914177614287" y="304.9150934789511"/>
  </node>
  <node id="2364" label="100" cy:nodeId="1271">
    <graphics z="0.0" x="535.2147393103226" y="-434.1093511011271"/>
  </node>
  <node id="2332" label="132" cy:nodeId="1303">
    <graphics z="0.0" x="433.82460259157256" y="-220.98435110112712"/>
  </node>
  <node id="2300" label="164" cy:nodeId="1335">
    <graphics z="0.0" x="346.59581230836943" y="-402.906439724174"/>
  </node>
  <node id="2459" label="5" cy:nodeId="1176">
    <graphics z="0.0" x="332.38920067506865" y="584.5977717016074"/>
  </node>
  <node id="2427" label="37" cy:nodeId="1208">
    <graphics z="0.0" x="260.9819664831741" y="325.96154123285737"/>
  </node>
  <node id="2363" label="101" cy:nodeId="1272">
    <graphics z="0.0" x="276.14085243898467" y="620.1722956273886"/>
  </node>
  <node id="2331" label="133" cy:nodeId="1304">
    <graphics z="0.0" x="450.9510521765335" y="-302.2525395776896"/>
  </node>
  <node id="2299" label="165" cy:nodeId="1336">
    <graphics z="0.0" x="407.2414116736038" y="-421.52002614995524"/>
  </node>
  <node id="2426" label="38" cy:nodeId="1209">
    <graphics z="0.0" x="185.17878197389678" y="250.7311030004355"/>
  </node>
  <node id="2362" label="102" cy:nodeId="1273">
    <graphics z="0.0" x="333.6219277258499" y="694.1955500219199"/>
  </node>
  <node id="2330" label="134" cy:nodeId="1305">
    <graphics z="0.0" x="467.10003899293974" y="652.0895319555136"/>
  </node>
  <node id="2298" label="166" cy:nodeId="1337">
    <graphics z="0.0" x="467.6751274939163" y="-392.66858572026774"/>
  </node>
  <node id="2457" label="7" cy:nodeId="1178">
    <graphics z="0.0" x="301.94748161989287" y="236.753197726998"/>
  </node>
  <node id="2361" label="103" cy:nodeId="1274">
    <graphics z="0.0" x="358.67067192751006" y="673.3465509984824"/>
  </node>
  <node id="2329" label="135" cy:nodeId="1306">
    <graphics z="0.0" x="427.0392327185257" y="599.6093073461386"/>
  </node>
  <node id="2297" label="167" cy:nodeId="1338">
    <graphics z="0.0" x="455.01397942262724" y="-444.666205349174"/>
  </node>
  <node id="2456" label="8" cy:nodeId="1179">
    <graphics z="0.0" x="234.55670021730498" y="634.2977839086386"/>
  </node>
  <node id="2360" label="104" cy:nodeId="1275">
    <graphics z="0.0" x="255.14358757692412" y="700.4867487523886"/>
  </node>
  <node id="2328" label="136" cy:nodeId="1307">
    <graphics z="0.0" x="326.69488762575224" y="505.5507135961386"/>
  </node>
  <node id="2296" label="168" cy:nodeId="1339">
    <graphics z="0.0" x="435.31588982301787" y="-348.69132131597087"/>
  </node>
  <node id="2359" label="105" cy:nodeId="1276">
    <graphics z="0.0" x="251.1637806768997" y="656.7611628148886"/>
  </node>
  <node id="2327" label="137" cy:nodeId="1308">
    <graphics z="0.0" x="330.3461708899124" y="542.6003962133261"/>
  </node>
  <node id="2295" label="169" cy:nodeId="1340">
    <graphics z="0.0" x="410.17254875856474" y="-361.9953374292521"/>
  </node>
  <node id="2454" label="10" cy:nodeId="1181">
    <graphics z="0.0" x="494.14549492555693" y="-364.82385915776774"/>
  </node>
  <node id="2390" label="74" cy:nodeId="1245">
    <graphics z="0.0" x="368.88852165895537" y="-682.9249333765177"/>
  </node>
  <node id="2358" label="106" cy:nodeId="1277">
    <graphics z="0.0" x="273.66808556276396" y="585.0070734594199"/>
  </node>
  <node id="2326" label="138" cy:nodeId="1309">
    <graphics z="0.0" x="356.29872368532256" y="621.3816462133261"/>
  </node>
  <node id="2453" label="11" cy:nodeId="1182">
    <graphics z="0.0" x="287.40323876100615" y="667.5949640844199"/>
  </node>
  <node id="2421" label="43" cy:nodeId="1214">
    <graphics z="0.0" x="-267.5032172326462" y="347.970971164498"/>
  </node>
  <node id="2389" label="75" cy:nodeId="1246">
    <graphics z="0.0" x="315.4030556555374" y="-615.9274968530802"/>
  </node>
  <node id="2357" label="107" cy:nodeId="1278">
    <graphics z="0.0" x="296.1910424109085" y="643.8398981664511"/>
  </node>
  <node id="2325" label="139" cy:nodeId="1310">
    <graphics z="0.0" x="427.981447684346" y="631.8095636937949"/>
  </node>
  <node id="2452" label="12" cy:nodeId="1183">
    <graphics z="0.0" x="543.8387322302444" y="808.0626154516074"/>
  </node>
  <node id="2420" label="44" cy:nodeId="1215">
    <graphics z="0.0" x="-310.1677680138962" y="524.1090021703574"/>
  </node>
  <node id="2388" label="76" cy:nodeId="1247">
    <graphics z="0.0" x="435.09649895387724" y="-630.901312771049"/>
  </node>
  <node id="2356" label="108" cy:nodeId="1279">
    <graphics z="0.0" x="184.66185997682646" y="596.0380182836386"/>
  </node>
  <node id="2324" label="140" cy:nodeId="1311">
    <graphics z="0.0" x="378.4951500769241" y="607.5135431859824"/>
  </node>
</graph>
