# Supplementary material for: A zebrafish screen reveals Renin-angiotensin system inhibitors as neuroprotective via mitochondrial restoration in dopamine neurons
Source: eLife. 2021 Sep 22;10:e69795. doi: 10.7554/eLife.69795 (PMC8457844; doi:10.7554/eLife.69795)
Supplement: Figure 1—source data 1. — DMSO Control vs 9 mM MTZ. Human Parkin overexpression. Human PINK1 overexpression. Human DJ1 overexpression. Human alpha synuclein overexpression. Human alpha synuclein A53T overexpression. [file elife-69795-fig1-data1.xlsx]

## Sheet: Sheet7
		Figure 1 - source data 1
		Dopamine neuron intensity quantification and statistical tests
		Worksheet 1 - Control vs 9mM MTZ Treatment
		Worksheet 2 - Human Parkin (PARK2) Overexpression
		Worksheet 3 - Human Pink1 Overexpression
		Worksheet 3 - Human DJ1 Overexpression
		Worksheet 5 - Human asyn (PARK1) Overexpression
		Worksheet 6 - Human asyn A53T Overexpression

## Sheet: Control vs MTZ Treatment
Control (DMSO 0.2%)	9mM MTZ (24hrs)	Unpaired t test
1.36889	0.154153	P value	0.0126
0.733168	0.665201	P value summary	*
0.48956	0.628079	Significantly different (P < 0.05)?	Yes
1.33218	0.14569	One- or two-tailed P value?	Two-tailed
0.910809	1.05981	t, df	t=3.496, df=18
1.19685	0.26478
1.01821	0.554979
1.5479	0.635201
0.522554	0.544979
0.890579	0.293801

## Sheet: Human Parkin (PARK2) Overexpres
GFP DMSO	Parkin DMSO	GFP 9mM MTZ	Parkin 9mM MTZ		Column C	GFP 9mM MTZ		Column D	Parkin 9mM MTZ
0.494574	0.562373	0.553862	1.01873		vs.	vs.		vs.	vs.
1.3437	0.647176	0.1897	0.209837		Column A	GFP DMSO		Column C	GFP 9mM MTZ
0.33722	0.680221	0.66945	1.46559
1.01889	0.411575	0.288087	1.21952		Unpaired t test			Unpaired t test
0.618184	1.19862	0.353983	0.748281		P value	0.0008		P value	0.0353
1.00446	2.27404	0.378152	0.27707		P value summary	***		P value summary	*
0.584482	0.522505	0.122176	0.27707		Significantly different (P < 0.05)?	Yes		Significantly different (P < 0.05)?	Yes
1.17629	0.889339	0.381828	0.682398		One- or two-tailed P value?	Two-tailed		One- or two-tailed P value?	Two-tailed
1.81993	0.866411	0.729717	0.896268		t, df	t=3.899, df=22		t, df	t=2.266, df=19
1.22429	1.71873		0.674393
0.816103	0.35275		1.38096
0.706952	2.38207		0.357954
1.75176	1.01908
1.0277	0.475104
1.25628

## Sheet: Human PINK1 overexpression
GFP DMSO	Pink1 KD mut DMSO	Pink1 DMSO	GFP 9mM MTZ	Pink1 KD mut 9mM MTZ	Pink1 9mM MTZ		Column F	Pink1 9mM MTZ			Column F	Pink1 9mM MTZ
1.26058	0.912083	0.925397	0.105542	0.0330209	0.296888		vs.	vs.			vs.	vs.
1.43059	0.883977	1.49819	0.12767	0.094808	1.06914		Column D	GFP 9mM MTZ			Column E	Pink1 KD mut 9mM MTZ
1.02863	0.591103	1.27648	0.0350251	0.0559975	0.216145
0.186303	0.153903	1.15483	0.102887	0.0463821	0.0623541		Unpaired t test				Unpaired t test
1.01069	0.37596	1.35817	0.0629711	0.134679	0.741996		P value	0.0047			P value	0.0004
1.24072	0.914417	1.0146	0.533199	0.0857935	0.0639133		P value summary	**			P value summary	***
0.642366	0.865541	1.26895	0.0236709	0.0973472	0.286018		Significantly different (P < 0.05)?	Yes			Significantly different (P < 0.05)?	Yes
1.20047	1.46416	1.31365	0.205752	0.524684	0.312792		One- or two-tailed P value?	Two-tailed			One- or two-tailed P value?	Two-tailed
0.788949	0.609885	0.769834	0.256376	0.0548139	0.333903		t, df	t=3.056, df=30			t, df	t=3.894, df=35
0.573298	1.38323	1.95544	0.0667424	0.0755833	0.422319
0.644669	0.680161	1.2431	0.0543077	0.116851	0.346426
	0.878502	0.904444		0.194678	0.813975
	0.25076	0.537567		0.12898	0.356652
	1.65642	0.697738		0.0505847	0.166541
	1.99379	0.715524		0.00888731	0.552284
	1.03717	0.681778		0.326539	0.587309
		0.859865			0.365859
		0.335138			0.479518
		0.435571			0.422392
		1.47196			0.13846
		0.581765			0.251854

## Sheet: Human DJ1 overexpression
GFP DMSO	DJ1 DMSO	GFP 9mM MTZ	DJ1 9mMMTZ		Column D	DJ1 9mMMTZ
1.17245	0.95393	0.668862	0.443002		vs.	vs.
0.664535	1.43541	0.586791	0.500434		Column C	GFP 9mM MTZ
0.629347	0.888069	0.0212044	0.882374
1.15563	1.13683	0.0760501	0.588044		Unpaired t test
0.580208	1.17877	0.326883	0.626311		P value	0.0349
1.12249	0.827009	0.212648	0.514141		P value summary	*
0.762324	0.738438	0.250956	0.466702		Significantly different (P < 0.05)?	Yes
0.959422	0.950915	0.0980833	0.239318		One- or two-tailed P value?	Two-tailed
1.75497	0.864957	0.0449564	0.260898		t, df	t=2.248, df=22
0.632966	1.15031		0.396346
1.41754	0.947757		0.372534
0.913036	0.927596		1.02542
			0.240554
			0.335667
			0.239311

## Sheet: Human asyn overexpression
GFP DMSO	a-syn DMSO	GFP 9mM MTZ	a-syn 9mM MTZ		Column D	a-syn 9mM MTZ
0.998767	1.00379	0.0522708	0.477476		vs.	vs.
0.339467	1.29974	0.213742	0.125868		Column C	GFP 9mM MTZ
1.08041	0.639766	0.173919	0.210782
0.910007	1.17836	0.344362	0.0338357		Unpaired t test
1.1505	1.1654	0.155582	0.356982		P value	0.6485
0.553456	0.896517	0.407127	0.0632693		P value summary	ns
1.35158	0.981272	0.332023	0.237543		Significantly different (P < 0.05)?	No
0.751439	1.29865	0.0628176	0.0514922		One- or two-tailed P value?	Two-tailed
0.976907	0.584861	0.492846	0.225744		t, df	t=0.4624, df=21
	0.951638	0.0837468	0.0326721
	0.286471		0.283256
	0.776415		0.0751519
	0.594227		0.448305
	1.40364

## Sheet: Human asyn A53T overexpression
GFP DMSO	A53T DMSO	4.5 mM MTZ	4.5 mM MTZ A53T	9mM MTZ A53T	9 mM MTZ		Column D	a-syn 9mM MTZ
0.780478	1.08603	0.668194	0.309472	0.332487	0.192511		vs.	vs.
0.907965	0.823047	0.552259	0.576118	0.238515	0.345432		Column C	GFP 9mM MTZ
2.41836	0.882947	0.820926	0.711614	0.363685	0.366377
0.984401	1.12469	0.67061	0.700677	0.238803	0.347426		Unpaired t test
0.932031	0.849462	0.674759	0.855019	0.322164	0.360226		P value	0.6485
0.971054	0.909344	0.608165	0.489761	0.381317	0.41971		P value summary	ns
0.592632	0.800852	0.783309	0.410895	0.333923	0.427423		Significantly different (P < 0.05)?	No
0.850194	0.971219	0.688882	0.333238	0.248174	0.307729		One- or two-tailed P value?	Two-tailed
0.826605	0.879856	0.627568	0.458089	0.299823	0.310557		t, df	t=0.4624, df=21
0.728485	0.972423	0.614298	0.542611	0.202817	0.267575
		0.726971	0.441724		0.334453
		0.63466	0.00495071		0.331231
