# Supplementary material for: A zebrafish screen reveals Renin-angiotensin system inhibitors as neuroprotective via mitochondrial restoration in dopamine neurons
Source: eLife. 2021 Sep 22;10:e69795. doi: 10.7554/eLife.69795 (PMC8457844; doi:10.7554/eLife.69795)
Supplement: Figure 2—figure supplement 2—source data 1. [file elife-69795-fig2-figsupp2-data1.xlsx]

## Sheet: Sheet5
Figure 2 - Figure supplement 2 - source data 1
Dopamine neuron intensity quantification for Dose response
Worksheet 1 - Captopril treatment
Worksheet 2 - Aliskiren treatment
Worksheet 3 - Olmesartan treatment

## Sheet: Captopril Dose Response
Positive Control	Negative Control	10nM	100nM	1uM	10uM	100uM	1mM
0.921038	0.500573	0.526041	0.709871	0.688877	0.656164	1.21638	N/A
0.676981	0.494565	0.627835	1.05088	0.669435	1.01101	0.691064
0.977101	0.56734	0.700984	0.641025	0.386965	0.543711	0.725946
0.98987	0.541076	0.622356	0.547928	0.620654	0.812464	0.776901
1.06288	0.650297	0.704201	0.660519	0.479198	0.674074	0.718822
0.631818	0.448042	0.800888	0.639027	0.601966	0.738201	0.739027
0.801266	0.548303	1.07397	0.894139	0.735426	0.701581	0.601383
1.22272	0.808196	0.663203	0.831544	0.581481	0.696164	0.875606
0.701502	0.562425	0.771424	0.697437	0.508864	0.791036	0.580912
1.10719	0.591183	0.76113	0.899284	1.13088	0.798677	0.273236
1.2139	0.790348	0.444511	0.7207	0.821097	0.558161	0.809239
0.756522	0.771184	0.782683	0.672105	0.6568	0.749488	0.881246

## Sheet: Aliskiren Dose Response
Positive Control	Negative Control	0.4uM	2uM	10uM	50uM	250uM
1.74116	0.354974	0.307885	0.442821	0.344385	0.45482	0.0519645
0.976727	0.169109	0.434882	0.354389	0.580297	0.2958	0.0815405
1.35075	0.37896	0.166707	0.429536	0.372273	0.338409	0.281871
0.893896	0.328404	0.369237	0.465485	0.80693	0.221183	0.000870523
0.699091	0.318809	0.319064	0.351688	0.713234	0.288305	0.0157509
0.749777	0.344374	0.918721	0.397645	0.409547	0.381068	0.217546
0.732749	0.435972	0.420189	0.581912	0.427397	0.370972	0.224688
0.305893	0.34782	0.298951	0.301166	0.292805	0.370482	0.00390345
1.04981	0.207774	0.187925	0.559479	0.356238	0.246668	0.159478
0.972603	0.455315	0.485038	0.314436		0.265624	0.0902022
0.751355	0.382936	0.599763			0.333307
0.811303	0.355167	0.501945
0.554442	0.402404
0.591506	0.403969
0.804365	0.282552
1.00758	0.278778
0.544253
0.824894
0.731429
0.980009
1.3166
0.738271
0.741466
0.876741

## Sheet: Olmesartan Dose Response
Positive Control	Negative Control	0.4 uM	2 uM	10uM	50uM	100uM	250uM
0.914309	0.623416	0.65478	0.710559	0.757543	0.993306	0.676963	1.05854
0.852166	0.512555	0.650224	0.674638	0.791484	0.599198	0.858859	0.359933
0.979409	0.343003	0.629959	0.740623	0.677967	0.811364	0.705705	0.35512
0.980842	0.244794	0.470761	0.664634	0.699105	0.916262	0.835282	0.0326906
0.928587	0.476067	0.566585	0.807721	0.863922	0.777278	0.628306	0.426211
0.860829	0.594942	0.687919	0.588462	0.723907	0.829168	0.795873	0.140168
0.99206	0.35662	0.484918	0.579882	0.791826	0.651554	0.362331	0.138631
0.803545	0.556598	0.670542	0.6476	0.515663	0.54614	0.518237	0.634336
0.913907	0.510691	0.605946	0.759694	0.814629	0.462514	0.603959	0.592655
0.950384	0.231555	0.657201	0.617578	0.491296	1.17819	0.651919	0.306786
1.05055	0.477031	0.595136	0.565511	0.748186	0.734407	0.708326	0.882443
0.896184	0.562888	0.658257	0.414566	0.653877	0.78432	0.333372	1.13823
