# Supplementary material for: A zebrafish screen reveals Renin-angiotensin system inhibitors as neuroprotective via mitochondrial restoration in dopamine neurons
Source: eLife. 2021 Sep 22;10:e69795. doi: 10.7554/eLife.69795 (PMC8457844; doi:10.7554/eLife.69795)
Supplement: Figure 2—source data 1. [file elife-69795-fig2-data1.xlsx]

## Sheet: Sheet2
Figure 2 - source data 1
RAAS compound Secondary hit validation
Worksheet 1 - DA neuron quantification for secondary hit validation

## Sheet: RAAS hit validation
Control (0.2% DMSO)	9mM MTZ	9mM MTZ+NAC	9mM MTZ+Olmesartan	9mM MTZ+Captopril	9mM MTZ+Aliskiren	9mM MTZ+Candesartan
0.748762	0.69496	0.577497	0.544531	0.352322	0.780862	0.435195
0.924623	0.529393	0.496859	0.598297	0.405524	0.823015	0.533943
1.28929	0.452721	0.521936	0.496297	0.452438	0.89522	0.537383
0.878045	0.720733	0.393983	0.520199	0.512198	0.980491	0.556277
1.25198	0.755874	0.99079	0.546281	0.646595	0.700732	0.562697
1.06116	0.546562	0.40652	0.647476	0.68074	1.2642	0.587474
1.09859	0.452623	0.683422	0.773265	0.77822	0.596822	0.617724
0.74902	0.698779	0.678482	0.89014	0.852921	0.791104	0.629071
0.883518	0.391094	0.553836	0.966976	0.904158	0.736993	0.63221
1.115	0.248152	1.06517	1.13161	0.939133	1.59779	0.656621
1.04163	0.634595	0.524173	0.300366	0.658348	0.033265	0.658381
0.67186	0.288061	0.483743	0.858018	0.432708	0.346229	0.761664
1.34451	0.539954	0.579345	0.579271	0.69665	1.26036	0.77413
0.988055	0.250582	0.403142	0.775517	0.667378	0.289224	0.777959
0.94788	0.375087	0.700044	1.12592	0.69618	1.19488	0.608749
1.08246	0.419844	0.549085	0.938039	0.47467	0.371777	0.620536
0.772901	0.438304	0.336486	0.862222	0.658719	0.124526	0.708562
1.12453	0.493344	0.678199	0.392797	0.651437	1.02413	0.668298
0.736734	0.551123	0.441931	0.769241	0.917382	0.973645	0.623159
1.092	0.563816	0.480677	0.662183	0.427216	1.17926	0.482387
0.965072	0.573017	0.571589	0.670486	0.449349	1.34049	0.617998
0.749986	0.514192	0.492297	0.664324	0.785299	0.237556	0.577418
0.947629	0.621846	0.526211	0.604504	0.451797	0.923767	0.629413
1.13063	0.517703	0.366834	0.652907	0.586255	0.730829	0.614355
1.07201	0.196109	0.586082	1.01253	0.562284	0.84792	0.715949
1.24149	0.596677	0.374236	0.903728	0.885178	0.467617	0.51265
0.990496	0.673305	0.458682	0.805249	0.567961	1.19775	0.646486
0.873797	0.348409	0.502099	0.667273	0.633304	0.291361	0.512651
1.08143	0.60336	0.494701	1.0642	0.964962	0.554873	0.52381
0.954074	0.523032	0.598723	0.608517	0.275649	0.601434	0.722418
1.06174	0.615042	0.550038	0.746069	0.730996	1.34558	0.558997
1.29736	0.377638	0.388881	0.422075	0.622901	0.177812	0.733744
0.922914	0.463971	0.625522	1.10382	0.87952	1.04856	0.635826
1.30363	0.0900935	0.465533	0.715193	0.371066	0.405315	0.572326
0.900487	0.399948	0.64845	0.787712	0.595455	0.046515	0.606466
1.24109	0.576588	0.74726	0.739462	0.424685	0.446598	0.733306
1.33742	0.583279	0.446504	0.978178	0.722238	0.339202	0.613274
0.679885	0.14915	0.588119	0.775511	0.520958	0.73841	0.554165
1.00607	0.542618	0.646653	0.707437	0.215756	1.05075	0.516331
1.08721	0.534518	0.903188	0.478184	0.662095	1.17421	0.60224
