# Supplementary material for: A zebrafish screen reveals Renin-angiotensin system inhibitors as neuroprotective via mitochondrial restoration in dopamine neurons
Source: eLife. 2021 Sep 22;10:e69795. doi: 10.7554/eLife.69795 (PMC8457844; doi:10.7554/eLife.69795)
Supplement: Figure 2—source data 2. [file elife-69795-fig2-data2.xlsx]

## Sheet: Sheet1
Figure 2 - source data 2
Mass Spectrometry Data for adult zebrafish body and brain after chronic olmesartan treatment, Total distance moved for adult zebrafish
Worksheet 1 - Body mass spec data
Worksheet 2 -Brain mass spec data
Worksheet 3 -Adult zebrafish behavior total distance moved

## Sheet: Body_Mass_Spec
Peak Name: NA
Use as Internal Standard
Q1/Q3 Masses: 283.04/245.06 Da
Peak Name: Olmesartan_1
Internal Standard: NA
Q1/Q3 Masses: 447.30/207.10 Da
Fit	Linear	Weighting	1 / y	Iterate	Yes
Intercept	0.263
Slope	0.00118
Correlation coefficient	0.9992
Use Area
Peak Name: Olmesartan_2
Internal Standard: NA
Q1/Q3 Masses: 447.30/190.08 Da
Fit	Linear	Weighting	1 / y	Iterate	Yes
Error	Can't calculate regression because the system of equations is degenerate.
Use Area
Sample Name	Sample ID	Sample Type	Sample Comment	Set Number	Acquisition Method	Acquisition Date	Rack Type	Rack Position	Vial Position	Plate Type	Plate Position	File Name	Dilution Factor	Weight To Volume Ratio	Sample Annotation	Disposition	Analyte Peak Name	Analyte Units	Analyte Peak Area (counts)	Analyte Peak Area for DAD (mAU x min)	Analyte Peak Height (cps)	Analyte Peak Height for DAD (mAU)	Analyte Concentration (ng/mL)	Analyte Retention Time (min)	Analyte Expected RT (min)	Analyte RT Window (sec)	Analyte Centroid Location (min)	Analyte Start Scan	Analyte Start Time (min)	Analyte Stop Scan	Analyte Stop Time (min)	Analyte Integration Type	Analyte Signal To Noise	Analyte Peak Width (min)	Standard Query Status	Analyte Mass Ranges (Da)	Analyte Wavelength Ranges (nm)	Area Ratio	Height Ratio	Analyte Annotation	Analyte Channel	Analyte Peak Width at 50% Height (min)	Analyte Slope of Baseline (%/min)	Analyte Processing Alg.	Analyte Peak Asymmetry	Analyte Integration Quality	IS Peak Name	IS Units	IS Peak Area (counts)
solvent		Solvent		1	Olmesartan_180927__4500.dam	2018-10-24 18:39:43	Rack Order (Column)	1	37	Deep Well MTP 96	5	24Oct2018_New Fish Brain-Olmesartan-undiluted.wiff	1	0			Olmesartan_1	ng/mL	36.3	N/A	40.2	N/A	0	0.704	0.693	30	0.699	249	0.682	260	0.712	Base To Base	N/A	0.0303	N/A	447.300/207.100 Da	N/A	1.1	0.733		N/A	0.022	0	Specify Parameters - MQIII	0.358	0.159	NA	ng/mL	33
Double Blank-body		Double Blank		1	Olmesartan_180927__4500.dam	2018-10-24 18:41:58	Rack Order (Column)	1	62	Deep Well MTP 96	5	24Oct2018_New Fish Brain-Olmesartan-undiluted.wiff	1	0			Olmesartan_1	ng/mL	10700	N/A	5710	N/A	0	0.689	0.693	30	0.698	243	0.666	283	0.776	Valley	N/A	0.11	N/A	447.300/207.100 Da	N/A	118	77.7		N/A	0.0301	0	Specify Parameters - MQIII	3.8	0.985	NA	ng/mL	90.8
Blank-body+IS		Blank		1	Olmesartan_180927__4500.dam	2018-10-24 18:44:10	Rack Order (Column)	1	63	Deep Well MTP 96	5	24Oct2018_New Fish Brain-Olmesartan-undiluted.wiff	1	0			Olmesartan_1	ng/mL	10700	N/A	5780	N/A	0	0.688	0.693	30	0.696	242	0.663	274	0.751	Valley	N/A	0.088	N/A	447.300/207.100 Da	N/A	0.267	0.29		N/A	0.0316	0	Specify Parameters - MQIII	2.57	0.977	NA	ng/mL	40000
solvent		Solvent		1	Olmesartan_180927__4500.dam	2018-10-24 18:46:22	Rack Order (Column)	1	37	Deep Well MTP 96	5	24Oct2018_New Fish Brain-Olmesartan-undiluted.wiff	1	0			Olmesartan_1	ng/mL	19.8	N/A	33.6	N/A	0	0.762	0.693	30	0.764	275	0.754	283	0.776	Base To Base	N/A	0.022	N/A	447.300/207.100 Da	N/A	0.6	0.837		N/A	0.00833	0	Specify Parameters - MQIII	1.82	0.0779	NA	ng/mL	33
STD0005-body+IS		Standard		1	Olmesartan_180927__4500.dam	2018-10-24 18:48:37	Rack Order (Column)	1	64	Deep Well MTP 96	5	24Oct2018_New Fish Brain-Olmesartan-undiluted.wiff	1	0			Olmesartan_1	ng/mL	10100	N/A	5620	N/A	5	0.7	0.693	30	0.706	247	0.677	275	0.754	Base To Base	N/A	0.077	N/A	447.300/207.100 Da	N/A	0.257	0.287		N/A	0.0302	1.54	Specify Parameters - MQIII	2.29	0.965	NA	ng/mL	39300
STD0020-body+IS		Standard		1	Olmesartan_180927__4500.dam	2018-10-24 18:50:49	Rack Order (Column)	1	65	Deep Well MTP 96	5	24Oct2018_New Fish Brain-Olmesartan-undiluted.wiff	1	0			Olmesartan_1	ng/mL	11300	N/A	6120	N/A	20	0.688	0.693	30	0.696	242	0.663	272	0.745	Valley	N/A	0.0825	N/A	447.300/207.100 Da	N/A	0.281	0.303		N/A	0.0303	0.99	Specify Parameters - MQIII	2.36	0.974	NA	ng/mL	40100
STD0050-body+IS		Standard		1	Olmesartan_180927__4500.dam	2018-10-24 18:53:01	Rack Order (Column)	1	66	Deep Well MTP 96	5	24Oct2018_New Fish Brain-Olmesartan-undiluted.wiff	1	0			Olmesartan_1	ng/mL	13200	N/A	8090	N/A	50	0.684	0.693	30	0.693	240	0.657	283	0.776	Base To Base	N/A	0.118	N/A	447.300/207.100 Da	N/A	0.329	0.404		N/A	0.0243	0	Specify Parameters - MQIII	3.38	0.982	NA	ng/mL	40100
STD0200-body+IS		Standard		1	Olmesartan_180927__4500.dam	2018-10-24 18:55:13	Rack Order (Column)	1	67	Deep Well MTP 96	5	24Oct2018_New Fish Brain-Olmesartan-undiluted.wiff	1	0			Olmesartan_1	ng/mL	20000	N/A	11600	N/A	200	0.699	0.693	30	0.706	246	0.674	291	0.798	Base To Base	N/A	0.124	N/A	447.300/207.100 Da	N/A	0.493	0.552		N/A	0.0274	0.466	Specify Parameters - MQIII	4.02	0.989	NA	ng/mL	40600
STD0500-body+IS		Standard		1	Olmesartan_180927__4500.dam	2018-10-24 18:57:25	Rack Order (Column)	1	68	Deep Well MTP 96	5	24Oct2018_New Fish Brain-Olmesartan-undiluted.wiff	1	0			Olmesartan_1	ng/mL	34300	N/A	18900	N/A	500	0.693	0.693	30	0.7	243	0.666	289	0.792	Valley	N/A	0.127	N/A	447.300/207.100 Da	N/A	0.879	0.967		N/A	0.0297	0	Specify Parameters - MQIII	3.64	0.989	NA	ng/mL	39000
STD2000-body+IS		Standard		1	Olmesartan_180927__4500.dam	2018-10-24 18:59:37	Rack Order (Column)	1	69	Deep Well MTP 96	5	24Oct2018_New Fish Brain-Olmesartan-undiluted.wiff	1	0			Olmesartan_1	ng/mL	99300	N/A	55300	N/A	2000	0.699	0.693	30	0.706	244	0.668	304	0.833	Valley	N/A	0.165	N/A	447.300/207.100 Da	N/A	2.49	2.81		N/A	0.0293	0	Specify Parameters - MQIII	4.38	0.997	NA	ng/mL	39900
STD5000-body+IS		Standard		1	Olmesartan_180927__4500.dam	2018-10-24 19:01:49	Rack Order (Column)	1	70	Deep Well MTP 96	5	24Oct2018_New Fish Brain-Olmesartan-undiluted.wiff	1	0			Olmesartan_1	ng/mL	245000	N/A	136000	N/A	5000	0.694	0.693	30	0.702	241	0.66	312	0.856	Valley	N/A	0.195	N/A	447.300/207.100 Da	N/A	6.3	6.68		N/A	0.0294	-0.0162	Specify Parameters - MQIII	4.79	0.998	NA	ng/mL	38900
STD20000-body+IS		Standard		1	Olmesartan_180927__4500.dam	2018-10-24 19:04:01	Rack Order (Column)	1	71	Deep Well MTP 96	5	24Oct2018_New Fish Brain-Olmesartan-undiluted.wiff	1	0			Olmesartan_1	ng/mL	1080000	N/A	619000	N/A	20000	0.691	0.693	30	0.698	241	0.66	309	0.847	Valley	N/A	0.187	N/A	447.300/207.100 Da	N/A	25.9	30		N/A	0.0283	0	Specify Parameters - MQIII	5.14	0.999	NA	ng/mL	41900
STD50000-body+IS		Standard		1	Olmesartan_180927__4500.dam	2018-10-24 19:06:13	Rack Order (Column)	1	72	Deep Well MTP 96	5	24Oct2018_New Fish Brain-Olmesartan-undiluted.wiff	1	0			Olmesartan_1	ng/mL	3600000	N/A	2100000	N/A	50000	0.682	0.693	30	0.689	231	0.633	288	0.789	Valley	N/A	0.157	N/A	447.300/207.100 Da	N/A	90.2	102		N/A	0.0281	0	Specify Parameters - MQIII	2.2	0.998	NA	ng/mL	39900
solvent		Solvent		1	Olmesartan_180927__4500.dam	2018-10-24 19:08:25	Rack Order (Column)	1	37	Deep Well MTP 96	5	24Oct2018_New Fish Brain-Olmesartan-undiluted.wiff	1	0			Olmesartan_1	ng/mL	1090	N/A	575	N/A	0	0.689	0.693	30	0.694	240	0.657	270	0.74	Valley	N/A	0.0825	N/A	447.300/207.100 Da	N/A	16.5	14.3		N/A	0.027	0	Specify Parameters - MQIII	1.65	0.584	NA	ng/mL	66
solvent		Solvent		1	Olmesartan_180927__4500.dam	2018-10-24 19:10:37	Rack Order (Column)	1	37	Deep Well MTP 96	5	24Oct2018_New Fish Brain-Olmesartan-undiluted.wiff	1	0			Olmesartan_1	ng/mL	139	N/A	92	N/A	0	0.701	0.693	30	0.705	249	0.682	264	0.723	Valley	N/A	0.0413	N/A	447.300/207.100 Da	N/A	10.5	6.13		N/A	0.0273	125	Specify Parameters - MQIII	1.22	0.271	NA	ng/mL	13.2
solvent		Solvent		1	Olmesartan_180927__4500.dam	2018-10-24 19:12:52	Rack Order (Column)	1	37	Deep Well MTP 96	5	24Oct2018_New Fish Brain-Olmesartan-undiluted.wiff	1	0			Olmesartan_1	ng/mL	139	N/A	65.1	N/A	0	0.696	0.693	30	0.711	245	0.671	275	0.754	Base To Base	N/A	0.0825	N/A	447.300/207.100 Da	N/A	14.1	4.6		N/A	0.0339	124	Specify Parameters - MQIII	2.38	0.43	NA	ng/mL	9.9
STD0050-body+IS		Quality Control		1	Olmesartan_180927__4500.dam	2018-10-24 19:15:04	Rack Order (Column)	1	52	Deep Well MTP 96	5	24Oct2018_New Fish Brain-Olmesartan-undiluted.wiff	1	0			Olmesartan_1	ng/mL	13800	N/A	7330	N/A	50	0.686	0.693	30	0.695	241	0.66	286	0.784	Base To Base	N/A	0.124	N/A	447.300/207.100 Da	N/A	0.335	0.347		N/A	0.0318	0.735	Specify Parameters - MQIII	3.82	0.984	NA	ng/mL	41000
STD0500-body+IS		Quality Control		1	Olmesartan_180927__4500.dam	2018-10-24 19:17:16	Rack Order (Column)	1	53	Deep Well MTP 96	5	24Oct2018_New Fish Brain-Olmesartan-undiluted.wiff	1	0			Olmesartan_1	ng/mL	34100	N/A	18900	N/A	500	0.697	0.693	30	0.705	245	0.671	291	0.798	Base To Base	N/A	0.127	N/A	447.300/207.100 Da	N/A	0.868	0.93		N/A	0.0296	0	Specify Parameters - MQIII	3.99	0.992	NA	ng/mL	39200
STD20000-body+IS		Quality Control		1	Olmesartan_180927__4500.dam	2018-10-24 19:19:28	Rack Order (Column)	1	54	Deep Well MTP 96	5	24Oct2018_New Fish Brain-Olmesartan-undiluted.wiff	1	0			Olmesartan_1	ng/mL	1090000	N/A	626000	N/A	20000	0.69	0.693	30	0.697	241	0.66	299	0.82	Valley	N/A	0.16	N/A	447.300/207.100 Da	N/A	27.1	31.1		N/A	0.028	0.00183	Specify Parameters - MQIII	4.4	0.998	NA	ng/mL	40400
solvent		Solvent		1	Olmesartan_180927__4500.dam	2018-10-24 19:21:40	Rack Order (Column)	1	37	Deep Well MTP 96	5	24Oct2018_New Fish Brain-Olmesartan-undiluted.wiff	1	0			Olmesartan_1	ng/mL	403	N/A	248	N/A	0	0.691	0.693	30	0.701	246	0.674	269	0.737	Base To Base	N/A	0.0633	N/A	447.300/207.100 Da	N/A	6.1	7.24		N/A	0.027	0	Specify Parameters - MQIII	2.73	0.552	NA	ng/mL	66
solvent		Solvent		1	Olmesartan_180927__4500.dam	2018-10-24 19:23:55	Rack Order (Column)	1	37	Deep Well MTP 96	5	24Oct2018_New Fish Brain-Olmesartan-undiluted.wiff	1	0			Olmesartan_1	ng/mL	60	N/A	64.6	N/A	0	0.7	0.693	30	0.704	251	0.688	265	0.726	Base To Base	N/A	0.0385	N/A	447.300/207.100 Da	N/A	3.63	1.86		N/A	0.0112	-268	Specify Parameters - MQIII	2.11	0.239	NA	ng/mL	16.5
solvent		Solvent		1	Olmesartan_180927__4500.dam	2018-10-24 19:26:07	Rack Order (Column)	1	37	Deep Well MTP 96	5	24Oct2018_New Fish Brain-Olmesartan-undiluted.wiff	1	0			Olmesartan_1	ng/mL	69.3	N/A	33.5	N/A	0	0.709	0.693	30	0.713	250	0.685	271	0.743	Base To Base	N/A	0.0578	N/A	447.300/207.100 Da	N/A	3.5	1.26		N/A	0.044	0	Specify Parameters - MQIII	1.36	0.313	NA	ng/mL	19.8
Male-body		Unknown		1	Olmesartan_180927__4500.dam	2018-10-24 19:28:19	Rack Order (Column)	1	57	Deep Well MTP 96	5	24Oct2018_New Fish Brain-Olmesartan-undiluted.wiff	1	0			Olmesartan_1	ng/mL	60500	N/A	40800	N/A	N/A	0.689	0.693	30	0.695	239	0.655	280	0.767	Valley	N/A	0.113	N/A	447.300/207.100 Da	N/A	1.49	2.03		N/A	0.0221	0	Specify Parameters - MQIII	2.3	0.995	NA	ng/mL	40500
Female-body		Unknown		1	Olmesartan_180927__4500.dam	2018-10-24 19:30:31	Rack Order (Column)	1	58	Deep Well MTP 96	5	24Oct2018_New Fish Brain-Olmesartan-undiluted.wiff	1	0			Olmesartan_1	ng/mL	50500	N/A	33400	N/A	N/A	0.693	0.693	30	0.699	245	0.671	281	0.77	Valley	N/A	0.099	N/A	447.300/207.100 Da	N/A	1.29	1.67		N/A	0.0219	0.154	Specify Parameters - MQIII	3.65	0.993	NA	ng/mL	39200
solvent		Solvent		1	Olmesartan_180927__4500.dam	2018-10-24 19:32:43	Rack Order (Column)	1	37	Deep Well MTP 96	5	24Oct2018_New Fish Brain-Olmesartan-undiluted.wiff	1	0			Olmesartan_1	ng/mL	36.3	N/A	26.9	N/A	0	0.751	0.693	30	0.76	270	0.74	284	0.778	Base To Base	N/A	0.0385	N/A	447.300/207.100 Da	N/A	1.57	0.802		N/A	0.0317	0	Specify Parameters - MQIII	2.65	0.136	NA	ng/mL	23.1
solvent		Solvent		1	Olmesartan_180927__4500.dam	2018-10-24 19:34:58	Rack Order (Column)	1	37	Deep Well MTP 96	5	24Oct2018_New Fish Brain-Olmesartan-undiluted.wiff	1	0			Olmesartan_1	ng/mL	52.8	N/A	35	N/A	0	0.829	0.693	30	0.836	295	0.809	317	0.869	Base To Base	N/A	0.0605	N/A	447.300/207.100 Da	N/A	1.6	1.04		N/A	0.0485	0	Specify Parameters - MQIII	1.93	0.176	NA	ng/mL	33
solvent		Solvent		1	Olmesartan_180927__4500.dam	2018-10-24 19:37:10	Rack Order (Column)	1	37	Deep Well MTP 96	5	24Oct2018_New Fish Brain-Olmesartan-undiluted.wiff	1	0			Olmesartan_1	ng/mL	47.9	N/A	31.1	N/A	0	0.688	0.693	30	0.695	246	0.674	260	0.712	Base To Base	N/A	0.0385	N/A	447.300/207.100 Da	N/A	1.81	0.773		N/A	0.0298	556	Specify Parameters - MQIII	1.71	0.197	NA	ng/mL	26.4
STD0050-body+IS		Quality Control		1	Olmesartan_180927__4500.dam	2018-10-24 19:39:25	Rack Order (Column)	1	52	Deep Well MTP 96	5	24Oct2018_New Fish Brain-Olmesartan-undiluted.wiff	1	0			Olmesartan_1	ng/mL	13000	N/A	7300	N/A	50	0.689	0.693	30	0.697	241	0.66	273	0.748	Valley	N/A	0.088	N/A	447.300/207.100 Da	N/A	0.326	0.351		N/A	0.029	0	Specify Parameters - MQIII	2.09	0.977	NA	ng/mL	39900
STD0500-body+IS		Quality Control		1	Olmesartan_180927__4500.dam	2018-10-24 19:41:37	Rack Order (Column)	1	53	Deep Well MTP 96	5	24Oct2018_New Fish Brain-Olmesartan-undiluted.wiff	1	0			Olmesartan_1	ng/mL	33600	N/A	18800	N/A	500	0.696	0.693	30	0.705	246	0.674	282	0.773	Valley	N/A	0.099	N/A	447.300/207.100 Da	N/A	0.839	0.949		N/A	0.0292	0	Specify Parameters - MQIII	3.59	0.991	NA	ng/mL	40100
STD20000-body+IS		Quality Control		1	Olmesartan_180927__4500.dam	2018-10-24 19:43:49	Rack Order (Column)	1	54	Deep Well MTP 96	5	24Oct2018_New Fish Brain-Olmesartan-undiluted.wiff	1	0			Olmesartan_1	ng/mL	1090000	N/A	635000	N/A	20000	0.694	0.693	30	0.702	240	0.657	301	0.825	Valley	N/A	0.168	N/A	447.300/207.100 Da	N/A	26.7	30		N/A	0.0268	0	Specify Parameters - MQIII	3.64	0.998	NA	ng/mL	40900
solvent		Solvent		1	Olmesartan_180927__4500.dam	2018-10-24 19:46:01	Rack Order (Column)	1	37	Deep Well MTP 96	5	24Oct2018_New Fish Brain-Olmesartan-undiluted.wiff	1	0			Olmesartan_1	ng/mL	450	N/A	260	N/A	0	0.709	0.693	30	0.711	245	0.671	272	0.745	Base To Base	N/A	0.0743	N/A	447.300/207.100 Da	N/A	17	6.37		N/A	0.0355	-34.5	Specify Parameters - MQIII	0.959	0.483	NA	ng/mL	26.4
solvent		Solvent		1	Olmesartan_180927__4500.dam	2018-10-24 19:48:16	Rack Order (Column)	1	37	Deep Well MTP 96	5	24Oct2018_New Fish Brain-Olmesartan-undiluted.wiff	1	0			Olmesartan_1	ng/mL	35.2	N/A	51.9	N/A	0	0.687	0.693	30	0.693	248	0.679	259	0.71	Base To Base	N/A	0.0303	N/A	447.300/207.100 Da	N/A	1.78	2.56		N/A	0.00882	424	Specify Parameters - MQIII	2.88	0.125	NA	ng/mL	19.8
solvent		Solvent		1	Olmesartan_180927__4500.dam	2018-10-24 19:50:28	Rack Order (Column)	1	37	Deep Well MTP 96	5	24Oct2018_New Fish Brain-Olmesartan-undiluted.wiff	1	0			Olmesartan_1	ng/mL	36.3	N/A	38.9	N/A	0	0.686	0.693	30	0.692	247	0.677	258	0.707	Base To Base	N/A	0.0303	N/A	447.300/207.100 Da	N/A	2.2	1.37		N/A	0.0218	567	Specify Parameters - MQIII	2.38	0.139	NA	ng/mL	16.5
[truncated: 30 more columns]

## Sheet: Brain_Mass_Spec
Peak Name: NA
Use as Internal Standard
Q1/Q3 Masses: 283.04/245.06 Da
Peak Name: Olmesartan_1
Internal Standard: NA
Q1/Q3 Masses: 447.30/207.10 Da
Fit	Linear	Weighting	1 / y	Iterate	Yes
Intercept	0.168
Slope	0.00118
Correlation coefficient	0.9998
Use Area
Peak Name: Olmesartan_2
Internal Standard: NA
Q1/Q3 Masses: 447.30/190.08 Da
Fit	Linear	Weighting	1 / y	Iterate	Yes
Error	Can't calculate regression because the system of equations is degenerate.
Use Area
Sample Name	Sample ID	Sample Type	Sample Comment	Set Number	Acquisition Method	Acquisition Date	Rack Type	Rack Position	Vial Position	Plate Type	Plate Position	File Name	Dilution Factor	Weight To Volume Ratio	Sample Annotation	Disposition	Analyte Peak Name	Analyte Units	Analyte Peak Area (counts)	Analyte Peak Area for DAD (mAU x min)	Analyte Peak Height (cps)	Analyte Peak Height for DAD (mAU)	Analyte Concentration (ng/mL)	Analyte Retention Time (min)	Analyte Expected RT (min)	Analyte RT Window (sec)	Analyte Centroid Location (min)	Analyte Start Scan	Analyte Start Time (min)	Analyte Stop Scan	Analyte Stop Time (min)	Analyte Integration Type	Analyte Signal To Noise	Analyte Peak Width (min)	Standard Query Status	Analyte Mass Ranges (Da)	Analyte Wavelength Ranges (nm)	Area Ratio	Height Ratio	Analyte Annotation	Analyte Channel	Analyte Peak Width at 50% Height (min)	Analyte Slope of Baseline (%/min)	Analyte Processing Alg.	Analyte Peak Asymmetry	Analyte Integration Quality	IS Peak Name	IS Units	IS Peak Area (counts)
Double Blank-brain		Double Blank		1	Olmesartan_180927__4500.dam	43397.7	Rack Order (Column)	1	38	Deep Well MTP 96	5	24Oct2018_New Fish Brain-Olmesartan-undiluted.wiff	1	0			Olmesartan_1	ng/mL	6320	N/A	3530	N/A	0	0.702	0.692	30	0.708	246	0.674	281	0.77	Base To Base	N/A	0.0963	N/A	447.300/207.100 Da	N/A	49.1	40.1		N/A	0.0292	0	Specify Parameters - MQIII	2.39	0.973	NA	ng/mL	129
Blank-brain+IS		Blank		1	Olmesartan_180927__4500.dam	43397.7	Rack Order (Column)	1	39	Deep Well MTP 96	5	24Oct2018_New Fish Brain-Olmesartan-undiluted.wiff	1	0			Olmesartan_1	ng/mL	6090	N/A	3600	N/A	0	0.702	0.692	30	0.708	245	0.671	281	0.77	Base To Base	N/A	0.099	N/A	447.300/207.100 Da	N/A	0.142	0.16		N/A	0.0264	0	Specify Parameters - MQIII	2.18	0.966	NA	ng/mL	42900
solvent		Solvent		1	Olmesartan_180927__4500.dam	43397.7	Rack Order (Column)	1	37	Deep Well MTP 96	5	24Oct2018_New Fish Brain-Olmesartan-undiluted.wiff	1	0			Olmesartan_1	ng/mL	26.4	N/A	33.3	N/A	0	0.729	0.692	30	0.732	263	0.721	272	0.745	Base To Base	N/A	0.0248	N/A	447.300/207.100 Da	N/A	1	1		N/A	0.0158	0	Specify Parameters - MQIII	2	0.118	NA	ng/mL	26.4
STD0005-brain+IS		Standard		1	Olmesartan_180927__4500.dam	43397.7	Rack Order (Column)	1	40	Deep Well MTP 96	5	24Oct2018_New Fish Brain-Olmesartan-undiluted.wiff	1	0			Olmesartan_1	ng/mL	6770	N/A	3950	N/A	5	0.701	0.692	30	0.703	245	0.671	279	0.765	Base To Base	N/A	0.0935	N/A	447.300/207.100 Da	N/A	0.173	0.2		N/A	0.0283	1.81	Specify Parameters - MQIII	2.16	0.966	NA	ng/mL	39200
STD0020-brain+IS		Standard		1	Olmesartan_180927__4500.dam	43397.7	Rack Order (Column)	1	41	Deep Well MTP 96	5	24Oct2018_New Fish Brain-Olmesartan-undiluted.wiff	1	0			Olmesartan_1	ng/mL	6760	N/A	4110	N/A	20	0.694	0.692	30	0.699	244	0.668	276	0.756	Valley	N/A	0.088	N/A	447.300/207.100 Da	N/A	0.165	0.195		N/A	0.027	-1.44	Specify Parameters - MQIII	2.39	0.961	NA	ng/mL	40900
STD0050-brain+IS		Standard		1	Olmesartan_180927__4500.dam	43397.7	Rack Order (Column)	1	42	Deep Well MTP 96	5	24Oct2018_New Fish Brain-Olmesartan-undiluted.wiff	1	0			Olmesartan_1	ng/mL	9400	N/A	5240	N/A	50	0.695	0.692	30	0.699	243	0.666	274	0.751	Base To Base	N/A	0.0853	N/A	447.300/207.100 Da	N/A	0.236	0.258		N/A	0.0279	0	Specify Parameters - MQIII	1.92	0.977	NA	ng/mL	39800
STD0200-brain+IS		Standard		1	Olmesartan_180927__4500.dam	43397.7	Rack Order (Column)	1	43	Deep Well MTP 96	5	24Oct2018_New Fish Brain-Olmesartan-undiluted.wiff	1	0			Olmesartan_1	ng/mL	16500	N/A	9600	N/A	200	0.694	0.692	30	0.699	243	0.666	287	0.787	Base To Base	N/A	0.121	N/A	447.300/207.100 Da	N/A	0.41	0.477		N/A	0.0267	-0.574	Specify Parameters - MQIII	3.34	0.989	NA	ng/mL	40300
STD0500-brain+IS		Standard		1	Olmesartan_180927__4500.dam	43397.7	Rack Order (Column)	1	44	Deep Well MTP 96	5	24Oct2018_New Fish Brain-Olmesartan-undiluted.wiff	1	0			Olmesartan_1	ng/mL	28600	N/A	16000	N/A	500	0.692	0.692	30	0.699	243	0.666	289	0.792	Valley	N/A	0.127	N/A	447.300/207.100 Da	N/A	0.717	0.765		N/A	0.029	-0.257	Specify Parameters - MQIII	3.75	0.991	NA	ng/mL	40000
STD2000-brain+IS		Standard		1	Olmesartan_180927__4500.dam	43397.7	Rack Order (Column)	1	45	Deep Well MTP 96	5	24Oct2018_New Fish Brain-Olmesartan-undiluted.wiff	1	0			Olmesartan_1	ng/mL	100000	N/A	58500	N/A	2000	0.695	0.692	30	0.702	244	0.668	286	0.784	Valley	N/A	0.116	N/A	447.300/207.100 Da	N/A	2.49	2.81		N/A	0.0273	0	Specify Parameters - MQIII	3.28	0.996	NA	ng/mL	40400
STD5000-brain+IS		Standard		1	Olmesartan_180927__4500.dam	43397.7	Rack Order (Column)	1	46	Deep Well MTP 96	5	24Oct2018_New Fish Brain-Olmesartan-undiluted.wiff	1	0			Olmesartan_1	ng/mL	242000	N/A	135000	N/A	5000	0.696	0.692	30	0.702	241	0.66	279	0.765	Valley	N/A	0.105	N/A	447.300/207.100 Da	N/A	6.1	6.55		N/A	0.0287	0	Specify Parameters - MQIII	1.9	0.994	NA	ng/mL	39700
STD20000-brain+IS		Standard		1	Olmesartan_180927__4500.dam	43397.7	Rack Order (Column)	1	47	Deep Well MTP 96	5	24Oct2018_New Fish Brain-Olmesartan-undiluted.wiff	1	0			Olmesartan_1	ng/mL	1070000	N/A	631000	N/A	20000	0.703	0.692	30	0.708	245	0.671	317	0.869	Valley	N/A	0.198	N/A	447.300/207.100 Da	N/A	26.9	31.7		N/A	0.0276	0	Specify Parameters - MQIII	5.3	0.999	NA	ng/mL	39900
STD50000-brain+IS		Standard		1	Olmesartan_180927__4500.dam	43397.7	Rack Order (Column)	1	48	Deep Well MTP 96	5	24Oct2018_New Fish Brain-Olmesartan-undiluted.wiff	1	0			Olmesartan_1	ng/mL	3540000	N/A	2090000	N/A	50000	0.696	0.692	30	0.7	241	0.66	304	0.833	Valley	N/A	0.173	N/A	447.300/207.100 Da	N/A	87.8	102		N/A	0.0272	0.0011	Specify Parameters - MQIII	3.89	0.999	NA	ng/mL	40400
solvent		Solvent		1	Olmesartan_180927__4500.dam	43397.7	Rack Order (Column)	1	37	Deep Well MTP 96	5	24Oct2018_New Fish Brain-Olmesartan-undiluted.wiff	1	0			Olmesartan_1	ng/mL	1180	N/A	527	N/A	0	0.699	0.692	30	0.706	245	0.671	276	0.756	Base To Base	N/A	0.0853	N/A	447.300/207.100 Da	N/A	27.6	15.1		N/A	0.037	0	Specify Parameters - MQIII	2.12	0.648	NA	ng/mL	42.9
solvent		Solvent		1	Olmesartan_180927__4500.dam	43397.7	Rack Order (Column)	1	37	Deep Well MTP 96	5	24Oct2018_New Fish Brain-Olmesartan-undiluted.wiff	1	0			Olmesartan_1	ng/mL	273	N/A	225	N/A	0	0.696	0.692	30	0.705	250	0.685	267	0.732	Base To Base	N/A	0.0468	N/A	447.300/207.100 Da	N/A	3.59	4.79		N/A	0.018	63.4	Specify Parameters - MQIII	3.25	0.501	NA	ng/mL	75.9
solvent		Solvent		1	Olmesartan_180927__4500.dam	43397.8	Rack Order (Column)	1	37	Deep Well MTP 96	5	24Oct2018_New Fish Brain-Olmesartan-undiluted.wiff	1	0			Olmesartan_1	ng/mL	146	N/A	107	N/A	0	0.715	0.692	30	0.707	246	0.674	265	0.726	Base To Base	N/A	0.0523	N/A	447.300/207.100 Da	N/A	7.38	5.27		N/A	0.0188	0	Specify Parameters - MQIII	0.281	0.376	NA	ng/mL	19.8
STD0050-brain+IS		Quality Control		1	Olmesartan_180927__4500.dam	43397.8	Rack Order (Column)	1	49	Deep Well MTP 96	5	24Oct2018_New Fish Brain-Olmesartan-undiluted.wiff	1	0			Olmesartan_1	ng/mL	8530	N/A	4920	N/A	50	0.701	0.692	30	0.707	247	0.677	285	0.781	Base To Base	N/A	0.105	N/A	447.300/207.100 Da	N/A	0.213	0.24		N/A	0.0277	-1.3	Specify Parameters - MQIII	3.36	0.97	NA	ng/mL	40000
STD0500-brain+IS		Quality Control		1	Olmesartan_180927__4500.dam	43397.8	Rack Order (Column)	1	50	Deep Well MTP 96	5	24Oct2018_New Fish Brain-Olmesartan-undiluted.wiff	1	0			Olmesartan_1	ng/mL	30400	N/A	17100	N/A	500	0.699	0.692	30	0.706	247	0.677	289	0.792	Base To Base	N/A	0.116	N/A	447.300/207.100 Da	N/A	0.753	0.858		N/A	0.0289	0.337	Specify Parameters - MQIII	4.2	0.988	NA	ng/mL	40400
STD20000-brain+IS		Quality Control		1	Olmesartan_180927__4500.dam	43397.8	Rack Order (Column)	1	51	Deep Well MTP 96	5	24Oct2018_New Fish Brain-Olmesartan-undiluted.wiff	1	0			Olmesartan_1	ng/mL	1040000	N/A	615000	N/A	20000	0.698	0.692	30	0.703	244	0.668	296	0.811	Valley	N/A	0.143	N/A	447.300/207.100 Da	N/A	26.3	31.5		N/A	0.0266	0	Specify Parameters - MQIII	3.84	0.998	NA	ng/mL	39400
solvent		Solvent		1	Olmesartan_180927__4500.dam	43397.8	Rack Order (Column)	1	37	Deep Well MTP 96	5	24Oct2018_New Fish Brain-Olmesartan-undiluted.wiff	1	0			Olmesartan_1	ng/mL	424	N/A	313	N/A	0	0.702	0.692	30	0.701	245	0.671	267	0.732	Base To Base	N/A	0.0605	N/A	447.300/207.100 Da	N/A	8.03	6.59		N/A	0.0183	35.2	Specify Parameters - MQIII	0.946	0.461	NA	ng/mL	52.8
solvent		Solvent		1	Olmesartan_180927__4500.dam	43397.8	Rack Order (Column)	1	37	Deep Well MTP 96	5	24Oct2018_New Fish Brain-Olmesartan-undiluted.wiff	1	0			Olmesartan_1	ng/mL	95.2	N/A	70.7	N/A	0	0.702	0.692	30	0.703	249	0.682	265	0.726	Base To Base	N/A	0.044	N/A	447.300/207.100 Da	N/A	4.12	2.02		N/A	0.0284	-214	Specify Parameters - MQIII	1.22	0.257	NA	ng/mL	23.1
solvent		Solvent		1	Olmesartan_180927__4500.dam	43397.8	Rack Order (Column)	1	37	Deep Well MTP 96	5	24Oct2018_New Fish Brain-Olmesartan-undiluted.wiff	1	0			Olmesartan_1	ng/mL	34.7	N/A	36.5	N/A	0	0.7	0.692	30	0.703	252	0.69	262	0.718	Base To Base	N/A	0.0275	N/A	447.300/207.100 Da	N/A	2.63	2.43		N/A	0.0169	-664	Specify Parameters - MQIII	1.86	0.113	NA	ng/mL	13.2
Male-brain		Unknown		1	Olmesartan_180927__4500.dam	43397.8	Rack Order (Column)	1	55	Deep Well MTP 96	5	24Oct2018_New Fish Brain-Olmesartan-undiluted.wiff	1	0			Olmesartan_1	ng/mL	18200	N/A	9980	N/A	N/A	0.699	0.692	30	0.705	247	0.677	281	0.77	Valley	N/A	0.0935	N/A	447.300/207.100 Da	N/A	0.46	0.486		N/A	0.029	0	Specify Parameters - MQIII	3.25	0.984	NA	ng/mL	39500
Female-brain		Unknown		1	Olmesartan_180927__4500.dam	43397.8	Rack Order (Column)	1	56	Deep Well MTP 96	5	24Oct2018_New Fish Brain-Olmesartan-undiluted.wiff	1	0			Olmesartan_1	ng/mL	16400	N/A	9040	N/A	N/A	0.693	0.692	30	0.7	241	0.66	293	0.803	Base To Base	N/A	0.143	N/A	447.300/207.100 Da	N/A	0.41	0.446		N/A	0.0298	-0.516	Specify Parameters - MQIII	3.34	0.988	NA	ng/mL	40000
solvent		Solvent		1	Olmesartan_180927__4500.dam	43397.8	Rack Order (Column)	1	37	Deep Well MTP 96	5	24Oct2018_New Fish Brain-Olmesartan-undiluted.wiff	1	0			Olmesartan_1	ng/mL	92.4	N/A	47.5	N/A	0	0.692	0.692	30	0.701	246	0.674	266	0.729	Base To Base	N/A	0.055	N/A	447.300/207.100 Da	N/A	2.54	1.78		N/A	0.0428	0	Specify Parameters - MQIII	2.07	0.3	NA	ng/mL	36.3
solvent		Solvent		1	Olmesartan_180927__4500.dam	43397.8	Rack Order (Column)	1	37	Deep Well MTP 96	5	24Oct2018_New Fish Brain-Olmesartan-undiluted.wiff	1	0			Olmesartan_1	ng/mL	46.2	N/A	54.2	N/A	0	0.829	0.692	30	0.826	296	0.811	306	0.839	Base To Base	N/A	0.0275	N/A	447.300/207.100 Da	N/A	2.8	1.51		N/A	0.0161	0	Specify Parameters - MQIII	0.6	0.147	NA	ng/mL	16.5
solvent		Solvent		1	Olmesartan_180927__4500.dam	43397.8	Rack Order (Column)	1	37	Deep Well MTP 96	5	24Oct2018_New Fish Brain-Olmesartan-undiluted.wiff	1	0			Olmesartan_1	ng/mL	49.5	N/A	33.5	N/A	0	0.594	0.692	30	0.58	202	0.553	220	0.602	Base To Base	N/A	0.0495	N/A	447.300/207.100 Da	N/A	1.88	0.832		N/A	0.0404	0	Specify Parameters - MQIII	0.192	0.257	NA	ng/mL	26.4
STD0050-brain+IS		Quality Control		1	Olmesartan_180927__4500.dam	43397.8	Rack Order (Column)	1	49	Deep Well MTP 96	5	24Oct2018_New Fish Brain-Olmesartan-undiluted.wiff	1	0			Olmesartan_1	ng/mL	8510	N/A	4630	N/A	50	0.693	0.692	30	0.7	243	0.666	277	0.759	Base To Base	N/A	0.0935	N/A	447.300/207.100 Da	N/A	0.208	0.229		N/A	0.0288	0	Specify Parameters - MQIII	2.44	0.971	NA	ng/mL	40900
STD0500-brain+IS		Quality Control		1	Olmesartan_180927__4500.dam	43397.8	Rack Order (Column)	1	50	Deep Well MTP 96	5	24Oct2018_New Fish Brain-Olmesartan-undiluted.wiff	1	0			Olmesartan_1	ng/mL	30200	N/A	17300	N/A	500	0.694	0.692	30	0.702	245	0.671	282	0.773	Valley	N/A	0.102	N/A	447.300/207.100 Da	N/A	0.744	0.848		N/A	0.0273	0	Specify Parameters - MQIII	3.52	0.989	NA	ng/mL	40500
STD20000-brain+IS		Quality Control		1	Olmesartan_180927__4500.dam	43397.8	Rack Order (Column)	1	51	Deep Well MTP 96	5	24Oct2018_New Fish Brain-Olmesartan-undiluted.wiff	1	0			Olmesartan_1	ng/mL	1040000	N/A	602000	N/A	20000	0.692	0.692	30	0.698	240	0.657	307	0.842	Valley	N/A	0.184	N/A	447.300/207.100 Da	N/A	25.9	29.2		N/A	0.0286	-0.00186	Specify Parameters - MQIII	4.35	0.999	NA	ng/mL	40100
solvent		Solvent		1	Olmesartan_180927__4500.dam	43397.8	Rack Order (Column)	1	37	Deep Well MTP 96	5	24Oct2018_New Fish Brain-Olmesartan-undiluted.wiff	1	0			Olmesartan_1	ng/mL	354	N/A	240	N/A	0	0.694	0.692	30	0.699	246	0.674	262	0.718	Valley	N/A	0.044	N/A	447.300/207.100 Da	N/A	4.87	4.88		N/A	0.0247	38.8	Specify Parameters - MQIII	1.15	0.39	NA	ng/mL	72.6
solvent		Solvent		1	Olmesartan_180927__4500.dam	43397.8	Rack Order (Column)	1	37	Deep Well MTP 96	5	24Oct2018_New Fish Brain-Olmesartan-undiluted.wiff	1	0			Olmesartan_1	ng/mL	86.9	N/A	80	N/A	0	0.701	0.692	30	0.697	245	0.671	260	0.712	Valley	N/A	0.0413	N/A	447.300/207.100 Da	N/A	5.27	2.39		N/A	0.0156	0	Specify Parameters - MQIII	0.363	0.192	NA	ng/mL	16.5
solvent		Solvent		1	Olmesartan_180927__4500.dam	43397.8	Rack Order (Column)	1	37	Deep Well MTP 96	5	24Oct2018_New Fish Brain-Olmesartan-undiluted.wiff	1	0			Olmesartan_1	ng/mL	46.2	N/A	35	N/A	0	0.692	0.692	30	0.694	246	0.674	260	0.712	Base To Base	N/A	0.0385	N/A	447.300/207.100 Da	N/A	1.56	2.62		N/A	0.0232	0	Specify Parameters - MQIII	1.15	0.147	NA	ng/mL	29.7
[truncated: 30 more columns]

## Sheet: Adult behavior
Day	5mM MTZ	5mM MTZ	5mM MTZ	5mM MTZ	5mM MTZ	5mM MTZ	5 mM MTZ + Olm	5 mM MTZ + Olm	5 mM MTZ + Olm	5 mM MTZ + Olm	5 mM MTZ + Olm	5 mM MTZ + Olm	5 mM MTZ + L-DOPA	5 mM MTZ + L-DOPA	5 mM MTZ + L-DOPA	5 mM MTZ + L-DOPA	Tg Control	Tg Control	Tg Control	Tg Control
0	1784.29	1201.84	1135.25	1960.69	1979.36	1481.27	1499.04	2632.49	920.044	1584.25	1467.39	1620.6	1681.2	1366.09	1627.05	1392.32	1201.77	1584.24	1493.55	1292.25
2	1275.61	1075.26	172.592	480.031	618.02	649.982	904.068	379.768	3381.99	1062.32	2153.9	2770.06	1427.28	637.018	927.946	851.5	1294.11	1605.87	1649.54	1278.53
5	250.429	448.148	209.093	263.132	453.173	339.625	651.159	1700.13	2047.91	491.26	763.647	483.689	239.565	594.467	420.112	410.526	1144.94	1190.92	1367.87	1008.58
7	232.961	1392.38	480.839	549.02	858.513	962.167	1497.64	161.451	1516.78	1424.21	1324.72	547.121	1062.2	250.174	482.859	850.563	1037.05	1119.74	978.214	1274.76
9	128.89	394.491	422.62	721.645	169.232	295.315	749.897	1048.56	2133.29	1710.5	1435.65	815.534	1416.07	408.96	1568.35	529.044	1205.9	1817.94	1211.87	1921.43
12	471.714	612.843	688.778	531.435	573.523	584.864	1309.76	1195.79	2134.46	2002	1454.07	1179.13	2088.67	1229.2	1618.34	1715.31	1158.84	1766.84	954.475	1657.53
14	373.11	303.479	973.471	674.887	628.306	419.74	1057.7	1244.85	1558.95	1149.01	1617.84	1897.68	2801.86	2322.69	2797.17	2295.8	1973.47	1674.89	1624.2	2008.24
