# Supplementary material for: A zebrafish screen reveals Renin-angiotensin system inhibitors as neuroprotective via mitochondrial restoration in dopamine neurons
Source: eLife. 2021 Sep 22;10:e69795. doi: 10.7554/eLife.69795 (PMC8457844; doi:10.7554/eLife.69795)
Supplement: Figure 3—source data 1. [file elife-69795-fig3-data1.xlsx]

## Sheet: Sheet2
Figure 3 - source data 1
DA Neuron quantification for scrambled and agtr1a/1b sgrna injection
Worksheet 1 - DA Neuron quantification for scrambled and agtr1a/1b sgrna injection

## Sheet: Sheet1
AGTR1a,1b Scrambled sgRNA + 10mM MTZ	AGTR1a,1b sgRNA + 10mM MTZ		P value	0.0028
42.562	50.066		P value summary	**
32.799	50.359		Significantly different (P < 0.05)?	Yes
21.987	51.424		One- or two-tailed P value?	Two-tailed
42.862	37.196		t, df	t=3.282, df=28
28.507	59.444
33.819	49.932
48.926	58.897
59.717	34.818
44.762	58.608
41.707	56.719
29.618	50.709
35.719	35.717
33.717	55.618
21.809	32.619
44.717	65.717
