# Supplementary material for: A zebrafish screen reveals Renin-angiotensin system inhibitors as neuroprotective via mitochondrial restoration in dopamine neurons
Source: eLife. 2021 Sep 22;10:e69795. doi: 10.7554/eLife.69795 (PMC8457844; doi:10.7554/eLife.69795)
Supplement: Figure 4—source data 1. — TH staining quantification. 5HT staining quantification. [file elife-69795-fig4-data1.xlsx]

## Sheet: Sheet1
Figure 4 - source data 1
CBE Model Behavior and Staining
Worksheet 1 - Larval behavior tracking quantification
Worksheet 2 - TH Staining quantification of CBE model
Worksheet 3 - 5HT Staining quantification of CBE model larvae

## Sheet: Larval Behavior
Control (0.2% DMSO)	CBE (500uM)	CBE+ levodopa	CBE + Olmesartan	Levodopa (500uM)	Olmesartan (10uM)		CBE (500uM)	CBE + Olmesartan		CBE (500uM)	CBE+ levodopa
1552.85	146.797	672.477	306.724	849.281	793.07		Unpaired t test			Unpaired t test
1067.83	232.124	622.682	226.234	829.05	1387.36		P value	0.0119		P value	<0.0001
953.722	43.4054	408.477	295.901	1023.62	930.035		P value summary	*		P value summary	****
580.951	117.811	516.838	229.755	1035.24	961.147		Significantly different (P < 0.05)?	Yes		Significantly different (P < 0.05)?	Yes
717.924	47.6533	672.337	287.204	600.068	1192.05		One- or two-tailed P value?	Two-tailed		One- or two-tailed P value?	Two-tailed
599.466	76.0669	172.411	293.709	763.055	813.402		t, df	t=2.663, df=33		t, df	t=4.743, df=33
406.574	573.788	1037.67	610.234	1167.38	312.768
1223.8	311.818	751.64	400.27	718.224	1338.02
820.607	76.7158	63.4356	468.266	767.24	1106.14
880.148	840.262	1080.82	611.626	999.967	1355.13
677.201	399.005	773.957	589.765	695.71	853.432
1053.42	129.102	575.825	310.129	737.91	1207.16
690.911	281.23
607.457	236.697
891.746	19.6853
978.509	182.769
455.841	31.1436
663.855	88.9694
1178.88	383.795
904.976	135.387
821.018	200.636
1104.65	197.909
678.742	234.382
859.191

## Sheet: TH Staining
Control (0.2% DMSO)	Levodopa (500uM)	Olmesartan (10uM)	CBE (500uM)	CBE+ Levodopa	CBE+Olmesartan		CBE+Olmesartan	CBE (500uM)		Control (0.2% DMSO)	CBE (500uM)
0.631094	0.898806	0.605862	0.603049	0.642884	0.573695		Unpaired t test			Unpaired t test
0.619961	0.795068	0.615917	0.544022	0.575282	0.573047		P value	0.0065		P value	0.022
1.08914	0.899315	0.617916	0.520146	0.606237	1.02186		P value summary	**		P value summary	*
1.02419	0.798677	1.0412	0.643393	0.563483	1.0272		Significantly different (P < 0.05)?	Yes		Significantly different (P < 0.05)?	Yes
1.44109	0.799214	0.585924	0.671474	0.513061	1.03477		One- or two-tailed P value?	Two-tailed		One- or two-tailed P value?	Two-tailed
0.67302	0.882841	1.05452	0.665232	0.548876	0.565329		t, df	t=3.192, df=14		t, df	t=2.575, df=14
1.03011	0.831966	1.04897	0.566732	0.546058	0.736531
1.49145	0.812604	1.05426	0.629493	0.568747	1.07431

## Sheet: 5HT Staining
Control (0.2% DMSO)	Levodopa (500uM)	Olmesartan (10uM)	CBE (500uM)	CBE+ Levodopa	CBE+Olmesartan
0.882778	1.02857	1.46306	1.21565	0.773702	0.627892
1.64062	0.868184	1.57727	0.371593	0.821427	0.674906
1.06071	1.06459	1.65134	0.389026	0.818716	0.740582
0.63186	0.818826	0.678254	0.857247	0.885337	0.795254
0.78403	1.06665	0.657084	1.60118	0.857552	1.01725
1.11325	1.09523	0.375928	1.26487	0.804975	0.906588
0.964101	1.17329	0.652861	0.78085	0.883925	0.570995
1.12759	0.853805	0.634729	0.69746	0.862503	0.938395
