# Supplementary material for: A zebrafish screen reveals Renin-angiotensin system inhibitors as neuroprotective via mitochondrial restoration in dopamine neurons
Source: eLife. 2021 Sep 22;10:e69795. doi: 10.7554/eLife.69795 (PMC8457844; doi:10.7554/eLife.69795)
Supplement: Figure 5—source data 1. — -CBE vs Control. -CBE+ olmesartan vs CBE. -CBE vs MTZ. -MTZ+ olmesartan vs MTZ. [file elife-69795-fig5-data1.xlsx]

## Sheet: Figure 5 Source Data 1
Figure 5 - source data 1
DESeq2 output with RefSeq (GCF_000002035.6_GRCz11)
Worksheet 1 - Differential Gene Expression between CBE and Control
Worksheet 2 - Differential Gene Expression between CBE+Olmesartan and CBE
Worksheet 3 - Differential Gene Expression between Metronidazole and Control
Worksheet 4 - Differential Gene Expression between Metronidazole + Olmesartan and Metronidazole

## Sheet: CBE_Control
gene	baseMean	log2FoldChange	lfcSE	pvalue	padj
ENSDARG00000003599	1239.75	3.50269	0.247527	1.47904e-41	5.51921e-38
ENSDARG00000007320	2393.24	4.3873	0.32356	2.27561e-38	4.24587e-35
ENSDARG00000062469	1740.74	-4.13636	0.318439	6.0074e-35	7.47246e-32
ENSDARG00000102317	2507.87	4.18529	0.338376	1.5552e-31	1.45085e-28
ENSDARG00000013623	2054.98	6.09354	0.504152	3.53356e-31	2.63719e-28
ENSDARG00000036875	3258.37	4.7098	0.392206	6.9643e-30	4.33136e-27
ENSDARG00000036298	721.772	5.62627	0.484207	1.94884e-28	1.03891e-25
ENSDARG00000063911	842.414	5.0131	0.429064	2.2399e-28	1.04481e-25
ENSDARG00000051783	1514.3	4.6805	0.401452	4.61804e-28	1.91476e-25
ENSDARG00000041619	578.84	6.45854	0.567784	7.84785e-28	2.92853e-25
ENSDARG00000032929	1151.91	5.33822	0.469523	5.39201e-27	1.82918e-24
ENSDARG00000005926	186.312	6.467	0.582522	1.66281e-26	5.17082e-24
ENSDARG00000042566	823.848	4.33675	0.38144	1.99066e-26	5.71417e-24
ENSDARG00000015128	3026.61	6.68661	0.606214	2.39639e-26	6.38747e-24
ENSDARG00000021257	299.401	5.16966	0.460864	3.85921e-26	9.60075e-24
ENSDARG00000036044	1767.84	5.87093	0.529458	5.54678e-26	1.29366e-23
ENSDARG00000090930	565.551	-4.44272	0.395279	7.71592e-26	1.6937e-23
ENSDARG00000041232	2212.54	4.83971	0.438217	4.19917e-25	8.70541e-23
ENSDARG00000043453	1340.59	4.62461	0.424353	2.76942e-24	5.43918e-22
ENSDARG00000006691	642.892	5.23907	0.485063	3.49479e-24	6.52063e-22
ENSDARG00000014690	806.075	4.95044	0.460409	8.86125e-24	1.57461e-21
ENSDARG00000039347	1259.04	4.0819	0.379569	2.49746e-23	4.23617e-21
ENSDARG00000023298	3525.3	4.76039	0.446448	2.98549e-23	4.8438e-21
ENSDARG00000030408	642.073	4.80731	0.453394	5.32676e-23	8.28229e-21
ENSDARG00000038559	726.108	3.8463	0.359669	6.10898e-23	9.11858e-21
ENSDARG00000078942	261.904	-3.84597	0.360742	8.68893e-23	1.24707e-20
ENSDARG00000042993	1619.4	5.66975	0.546242	1.58478e-22	2.1903e-20
ENSDARG00000030053	421.665	4.45315	0.422635	1.68156e-22	2.24106e-20
ENSDARG00000069113	786.71	-3.18518	0.30022	2.76913e-22	3.56324e-20
ENSDARG00000063905	2321.99	3.78456	0.359044	3.34984e-22	4.16678e-20
ENSDARG00000025566	245.48	4.12534	0.394024	4.96766e-22	5.97982e-20
ENSDARG00000017445	257.722	4.28675	0.410339	5.27558e-22	6.03678e-20
ENSDARG00000058105	6515.22	4.18062	0.399786	5.33852e-22	6.03678e-20
ENSDARG00000057460	4095.04	5.97001	0.588785	1.12322e-21	1.23278e-19
ENSDARG00000032868	929.791	-2.73413	0.26069	1.41798e-21	1.51182e-19
ENSDARG00000067829	483.454	-3.99159	0.385852	2.12528e-21	2.20298e-19
ENSDARG00000098273	267.235	-4.19099	0.406099	2.21248e-21	2.23139e-19
ENSDARG00000081270	4766.73	-3.58705	0.346844	3.28048e-21	3.22146e-19
ENSDARG00000063924	1926.22	4.192	0.408532	4.07291e-21	3.89708e-19
ENSDARG00000052073	131.591	5.43779	0.539193	4.70035e-21	4.38499e-19
ENSDARG00000035860	5524.88	4.24262	0.419432	1.72034e-20	1.56577e-18
ENSDARG00000063068	770.375	-2.84267	0.278063	2.09015e-20	1.85706e-18
ENSDARG00000019230	858.683	5.28913	0.531638	2.32151e-20	2.01466e-18
ENSDARG00000091148	1782.29	5.62895	0.571002	3.35254e-20	2.84328e-18
ENSDARG00000036329	224.446	6.18985	0.635036	3.70968e-20	3.03928e-18
ENSDARG00000099424	283.355	-3.36607	0.33244	3.74653e-20	3.03928e-18
ENSDARG00000092693	1032.28	5.00514	0.503743	3.98654e-20	3.16517e-18
ENSDARG00000100392	4198.67	4.20054	0.420331	6.19218e-20	4.81394e-18
ENSDARG00000053875	712.025	5.27873	0.536598	7.12353e-20	5.42497e-18
ENSDARG00000037783	444.13	5.38281	0.550746	1.13772e-19	8.49111e-18
ENSDARG00000004539	427.266	-4.07125	0.41037	1.47911e-19	1.08226e-17
ENSDARG00000102142	755.752	-3.66987	0.368501	1.52776e-19	1.09635e-17
ENSDARG00000020893	69.8484	5.56239	0.575642	2.51702e-19	1.77219e-17
ENSDARG00000025269	194.522	3.74875	0.378997	2.78364e-19	1.92361e-17
ENSDARG00000014569	123.559	4.47435	0.456227	2.86942e-19	1.94684e-17
ENSDARG00000083699	22609.2	-3.57777	0.362075	3.62618e-19	2.41635e-17
ENSDARG00000070083	1250.55	4.97671	0.51261	3.9126e-19	2.56147e-17
ENSDARG00000097157	198.047	5.91222	0.621336	5.72523e-19	3.68352e-17
ENSDARG00000009447	207.39	6.24464	0.662686	7.37762e-19	4.66619e-17
ENSDARG00000041623	756.604	5.30809	0.553707	7.86122e-19	4.88919e-17
ENSDARG00000044093	1055.88	3.52706	0.36013	9.05443e-19	5.53898e-17
ENSDARG00000058734	85.9986	5.13133	0.535049	9.86103e-19	5.93512e-17
ENSDARG00000103007	578.4	4.9172	0.514834	1.95289e-18	1.15674e-16
ENSDARG00000006260	284.335	6.10651	0.653511	2.00937e-18	1.1716e-16
ENSDARG00000011405	16330	5.11516	0.540027	3.13389e-18	1.79915e-16
ENSDARG00000008859	1518.52	-3.24485	0.335975	4.41256e-18	2.42148e-16
ENSDARG00000068992	1228.38	3.53194	0.366611	4.31699e-18	2.42148e-16
ENSDARG00000090428	648.606	5.51011	0.58787	4.34795e-18	2.42148e-16
ENSDARG00000037350	668.293	3.21273	0.333034	5.05444e-18	2.73352e-16
ENSDARG00000017294	580.67	-3.68457	0.385703	8.18613e-18	4.36394e-16
ENSDARG00000076572	1494.16	5.85014	0.634668	1.03511e-17	5.44035e-16
ENSDARG00000061862	782.576	-3.4198	0.358107	1.08266e-17	5.61126e-16
ENSDARG00000094673	271.426	4.4967	0.477783	1.28366e-17	6.56186e-16
ENSDARG00000021838	3574.51	5.6051	0.606825	1.32322e-17	6.67263e-16
ENSDARG00000018637	225.803	4.29783	0.458766	2.46127e-17	1.22461e-15
ENSDARG00000019702	531.486	4.64506	0.500362	3.55116e-17	1.74363e-15
ENSDARG00000003631	371.74	-3.6177	0.384813	3.72589e-17	1.78639e-15
ENSDARG00000030602	3059.29	4.29591	0.460726	3.73398e-17	1.78639e-15
ENSDARG00000018903	196.954	4.26453	0.458221	4.5665e-17	2.15702e-15
ENSDARG00000010553	94.1015	5.36824	0.58753	4.86925e-17	2.27128e-15
ENSDARG00000099833	56.3017	5.84312	0.646011	5.05815e-17	2.33026e-15
ENSDARG00000021864	3881.18	3.47279	0.370603	5.70057e-17	2.5942e-15
ENSDARG00000016788	367.107	-3.23482	0.344645	6.08394e-17	2.7353e-15
ENSDARG00000012914	527.605	-2.61262	0.277664	7.811e-17	3.46997e-15
ENSDARG00000103651	335.029	-4.43648	0.480901	7.9407e-17	3.48609e-15
ENSDARG00000014717	335.757	-3.48166	0.373746	9.50696e-17	4.12517e-15
ENSDARG00000070426	275.386	3.84946	0.415252	1.01562e-16	4.35622e-15
ENSDARG00000025850	545.859	4.94986	0.542582	1.03775e-16	4.40059e-15
ENSDARG00000070437	893.612	4.03932	0.438936	1.55813e-16	6.533e-15
ENSDARG00000076526	730.065	-2.80978	0.301468	1.57988e-16	6.5506e-15
ENSDARG00000010516	1437.75	3.52849	0.382168	1.97533e-16	8.10021e-15
ENSDARG00000087164	1371.07	5.58208	0.625122	2.24103e-16	9.08987e-15
ENSDARG00000003311	359.839	-3.27464	0.354535	2.39994e-16	9.62979e-15
ENSDARG00000053457	1563.47	3.70666	0.404734	3.32455e-16	1.31978e-14
ENSDARG00000011841	279.165	5.99189	0.68119	3.5114e-16	1.37929e-14
ENSDARG00000042660	384.177	3.69095	0.404384	4.49155e-16	1.74592e-14
ENSDARG00000014867	1182.39	3.71724	0.407985	5.07651e-16	1.93303e-14
ENSDARG00000041925	382.564	5.58015	0.631319	5.03162e-16	1.93303e-14
ENSDARG00000076693	1666.72	5.72198	0.650377	5.65081e-16	2.12997e-14
ENSDARG00000056744	288.008	5.741	0.653543	6.15222e-16	2.29578e-14
ENSDARG00000027249	860.229	4.17225	0.461802	6.28045e-16	2.32043e-14
ENSDARG00000039914	271.021	5.52728	0.628547	8.18622e-16	2.99489e-14
ENSDARG00000025581	986.224	3.09362	0.339339	8.47632e-16	3.07092e-14
ENSDARG00000059360	95.4575	5.32142	0.602993	8.68477e-16	3.11491e-14
ENSDARG00000094460	226.284	-3.73383	0.412586	8.7647e-16	3.11491e-14
ENSDARG00000103846	445.439	3.88925	0.431496	1.04105e-15	3.66492e-14
ENSDARG00000062338	292.469	-3.124	0.34407	1.16272e-15	4.055e-14
ENSDARG00000104839	77.836	4.99609	0.565187	1.24889e-15	4.31519e-14
ENSDARG00000020298	31.161	5.45967	0.624358	1.41121e-15	4.83131e-14
ENSDARG00000075747	192.942	-3.62942	0.404974	2.15765e-15	7.31959e-14
ENSDARG00000020850	1429.26	3.47684	0.387954	2.49639e-15	8.39244e-14
ENSDARG00000053365	2538.82	5.09471	0.583286	2.73186e-15	9.04987e-14
ENSDARG00000086735	902.082	-2.81186	0.312006	2.74045e-15	9.04987e-14
ENSDARG00000039730	303.541	5.05589	0.578613	2.80811e-15	9.19197e-14
ENSDARG00000078348	626.871	-2.79866	0.310924	3.06076e-15	9.84841e-14
ENSDARG00000095273	89.8196	6.42406	0.761102	3.06144e-15	9.84841e-14
ENSDARG00000029500	1330.74	4.28427	0.484733	3.23036e-15	1.0303e-13
ENSDARG00000056258	336.959	-3.07026	0.342633	3.58685e-15	1.13431e-13
ENSDARG00000074149	262.281	-3.47139	0.38933	3.7901e-15	1.18851e-13
ENSDARG00000091408	165.776	-3.90753	0.441797	4.67267e-15	1.45306e-13
ENSDARG00000095556	95.1013	5.71039	0.668526	5.28508e-15	1.62992e-13
ENSDARG00000101507	172.624	-4.31073	0.492189	6.36974e-15	1.94832e-13
ENSDARG00000024548	852.134	4.83256	0.557283	6.91487e-15	2.09786e-13
ENSDARG00000063899	738.151	4.36216	0.500755	9.06138e-15	2.72691e-13
ENSDARG00000101849	303.815	2.63165	0.296079	9.54616e-15	2.84982e-13
ENSDARG00000042725	228.756	5.98317	0.713856	1.22826e-14	3.63762e-13
ENSDARG00000045373	204.417	3.84292	0.441404	1.70662e-14	5.01456e-13
ENSDARG00000068507	812.036	4.96391	0.581434	1.83031e-14	5.33597e-13
ENSDARG00000094310	686.224	4.86102	0.568352	1.85811e-14	5.37502e-13
ENSDARG00000043371	88.4767	3.76127	0.432108	1.88401e-14	5.40802e-13
ENSDARG00000013475	166.332	3.94539	0.4564	2.62331e-14	7.43797e-13
ENSDARG00000101627	2735.95	-3.5537	0.408951	2.63106e-14	7.43797e-13
ENSDARG00000016793	6569.25	4.43658	0.518445	3.14651e-14	8.82826e-13
ENSDARG00000046157	1573.78	3.67656	0.425015	3.29498e-14	9.17586e-13
ENSDARG00000021811	308.151	3.20839	0.369267	3.6317e-14	1.00386e-12
ENSDARG00000019008	110.085	4.85222	0.573701	4.23984e-14	1.16335e-12
ENSDARG00000058206	58.6588	6.52659	0.80767	4.49362e-14	1.22398e-12
ENSDARG00000038075	177.858	4.19895	0.49222	5.2906e-14	1.43062e-12
ENSDARG00000044562	281.653	4.66699	0.551736	5.43191e-14	1.45827e-12
ENSDARG00000076542	206.091	-3.43967	0.399179	5.54208e-14	1.47721e-12
ENSDARG00000105323	61.107	4.83992	0.574313	5.58526e-14	1.47816e-12
ENSDARG00000035054	79.2529	4.47182	0.52853	6.88773e-14	1.81003e-12
ENSDARG00000038076	102.99	4.96396	0.592938	7.46056e-14	1.94686e-12
ENSDARG00000013351	742.592	2.86738	0.333156	9.75409e-14	2.52768e-12
ENSDARG00000070914	213.601	2.89746	0.336843	9.9519e-14	2.56116e-12
ENSDARG00000029533	1666.25	3.81004	0.448408	1.0882e-13	2.78134e-12
ENSDARG00000080152	197.882	6.27669	0.781639	1.1643e-13	2.95561e-12
ENSDARG00000034753	163.37	5.68448	0.697253	1.40491e-13	3.5423e-12
ENSDARG00000054930	299.89	-4.1528	0.49319	1.43439e-13	3.59236e-12
ENSDARG00000083986	1199.77	-3.99314	0.473444	1.52624e-13	3.79692e-12
ENSDARG00000025147	63.5737	5.41636	0.661883	1.74857e-13	4.32121e-12
ENSDARG00000092488	369.441	-3.39401	0.40029	1.90404e-13	4.67446e-12
ENSDARG00000035692	1382.76	2.82882	0.332134	2.18255e-13	5.32318e-12
ENSDARG00000079854	534.327	-2.89615	0.340335	2.21172e-13	5.3593e-12
ENSDARG00000036613	180.996	-4.86677	0.591576	2.87734e-13	6.9272e-12
ENSDARG00000002235	425.167	-3.84141	0.458557	2.91938e-13	6.98337e-12
ENSDARG00000104945	302.011	5.19665	0.636724	2.98817e-13	7.10237e-12
ENSDARG00000058522	233.264	-3.10512	0.367522	3.16322e-13	7.44381e-12
ENSDARG00000074340	178.237	3.69112	0.44017	3.17171e-13	7.44381e-12
ENSDARG00000034427	31.6947	6.20381	0.783319	3.22489e-13	7.52132e-12
ENSDARG00000036028	97.862	4.20952	0.507317	3.77555e-13	8.69687e-12
ENSDARG00000062148	441.404	-3.57663	0.42687	3.76664e-13	8.69687e-12
ENSDARG00000077361	749.664	-2.10568	0.248094	4.46738e-13	1.02274e-11
ENSDARG00000100409	51.1233	5.7846	0.724938	4.67736e-13	1.05783e-11
ENSDARG00000103566	252.618	4.49596	0.546305	4.65827e-13	1.05783e-11
ENSDARG00000032725	2533.72	2.31472	0.27372	5.17419e-13	1.16314e-11
ENSDARG00000070849	524.344	4.85658	0.596477	5.85582e-13	1.30849e-11
ENSDARG00000062765	783.745	-2.24014	0.265346	6.10185e-13	1.35512e-11
ENSDARG00000093688	35.1708	6.62917	0.860038	6.13712e-13	1.35512e-11
ENSDARG00000017314	513.95	4.89574	0.603106	6.76111e-13	1.48411e-11
ENSDARG00000031164	114.549	5.73757	0.722835	7.10765e-13	1.55106e-11
ENSDARG00000063711	195.817	-3.3944	0.40794	7.29049e-13	1.58171e-11
ENSDARG00000100075	327.529	-4.06947	0.494923	8.31484e-13	1.79352e-11
ENSDARG00000098080	544.061	-2.31216	0.275308	8.50753e-13	1.82454e-11
ENSDARG00000099664	67.9931	5.74546	0.726986	9.18125e-13	1.95777e-11
ENSDARG00000059304	52.758	5.43729	0.68392	1.10126e-12	2.33495e-11
ENSDARG00000041926	257.382	-3.20105	0.386221	1.13819e-12	2.39961e-11
ENSDARG00000081423	187.139	5.44687	0.686083	1.18282e-12	2.47968e-11
ENSDARG00000102643	83.4998	4.08446	0.500234	1.31312e-12	2.73747e-11
ENSDARG00000013615	400.248	4.01547	0.491661	1.39616e-12	2.89443e-11
ENSDARG00000052114	494.145	-2.56139	0.308284	1.55669e-12	3.20938e-11
ENSDARG00000100222	490.859	-2.82592	0.341138	1.59127e-12	3.26265e-11
ENSDARG00000007172	612.507	-2.47453	0.297766	1.62287e-12	3.30927e-11
ENSDARG00000006008	201.412	-3.69767	0.451529	1.63371e-12	3.31325e-11
ENSDARG00000035400	705.83	3.6771	0.449802	1.87711e-12	3.78632e-11
ENSDARG00000101569	593.237	-2.0263	0.243563	1.94819e-12	3.90857e-11
ENSDARG00000058044	296.947	-3.0684	0.372578	1.97278e-12	3.93672e-11
ENSDARG00000019205	116.85	2.84283	0.344529	2.06224e-12	4.09336e-11
ENSDARG00000071060	85.6445	4.16003	0.513735	2.09294e-12	4.13232e-11
ENSDARG00000054818	1123.26	3.76142	0.461607	2.14164e-12	4.20621e-11
ENSDARG00000103929	68.7271	4.17981	0.516889	2.23908e-12	4.37456e-11
ENSDARG00000021225	442.92	-2.71544	0.329116	2.27507e-12	4.42173e-11
ENSDARG00000020982	136.038	-4.12716	0.510107	2.3001e-12	4.44721e-11
ENSDARG00000037071	214.268	5.79297	0.745965	2.43536e-12	4.68447e-11
ENSDARG00000100664	176.775	-4.02795	0.498294	2.73566e-12	5.23511e-11
ENSDARG00000020504	116.617	4.43418	0.552824	2.78567e-12	5.30362e-11
ENSDARG00000079639	233.58	-3.37769	0.414394	3.0503e-12	5.77797e-11
ENSDARG00000031776	623.463	3.98664	0.494194	3.27905e-12	6.17989e-11
ENSDARG00000005451	155.384	3.46191	0.425745	3.31309e-12	6.21267e-11
ENSDARG00000095421	412.17	-2.5035	0.304819	3.59604e-12	6.70955e-11
ENSDARG00000104011	297.463	4.11497	0.512386	3.79368e-12	7.04308e-11
ENSDARG00000077776	66.2514	4.49788	0.564415	3.89466e-12	7.19477e-11
ENSDARG00000054823	41.3478	5.27256	0.675288	4.44763e-12	8.17582e-11
ENSDARG00000011125	61.4246	4.92155	0.624938	4.5476e-12	8.20459e-11
ENSDARG00000037402	70.2573	6.23545	0.824663	4.55123e-12	8.20459e-11
ENSDARG00000060489	55.3214	4.30695	0.539676	4.52721e-12	8.20459e-11
ENSDARG00000091001	83.908	5.85189	0.763016	4.52533e-12	8.20459e-11
ENSDARG00000002082	98.6349	4.27692	0.536956	5.32053e-12	9.54531e-11
ENSDARG00000102353	743.691	-3.13833	0.387499	5.76578e-12	1.02946e-10
ENSDARG00000100742	162.403	3.73916	0.467071	7.04388e-12	1.25167e-10
ENSDARG00000002369	113.563	4.00379	0.503209	7.86107e-12	1.39026e-10
ENSDARG00000012987	142.484	4.58118	0.583091	8.53397e-12	1.50215e-10
ENSDARG00000017386	259.621	-3.437	0.428931	8.9277e-12	1.56408e-10
ENSDARG00000098654	205.153	-2.84781	0.353054	9.49273e-12	1.6553e-10
ENSDARG00000016676	598.706	2.79341	0.346242	9.75782e-12	1.69361e-10
ENSDARG00000015862	179.549	4.70271	0.602235	1.05325e-11	1.81961e-10
ENSDARG00000036282	24.7955	6.08571	0.812954	1.09651e-11	1.88561e-10
ENSDARG00000044422	123.634	-4.068	0.515214	1.18844e-11	2.03432e-10
ENSDARG00000006413	1085.04	3.533	0.443812	1.24441e-11	2.12039e-10
ENSDARG00000020759	279.134	-3.53108	0.443997	1.32606e-11	2.24925e-10
ENSDARG00000039268	51.3661	4.75677	0.612335	1.33954e-11	2.26184e-10
ENSDARG00000040286	24.4721	5.63035	0.74334	1.41525e-11	2.37891e-10
ENSDARG00000017843	107.805	4.38453	0.56059	1.46098e-11	2.44476e-10
ENSDARG00000063908	2968.9	4.26916	0.546237	1.76557e-11	2.94128e-10
ENSDARG00000101813	542.811	2.12287	0.263938	1.83198e-11	3.03833e-10
ENSDARG00000052905	54.8409	5.7573	0.76836	2.03714e-11	3.36365e-10
ENSDARG00000027828	338.145	-1.9443	0.242048	2.18779e-11	3.59649e-10
ENSDARG00000029689	306.369	3.25752	0.411509	2.29481e-11	3.75586e-10
ENSDARG00000045248	1851.91	3.95431	0.506157	2.61822e-11	4.26648e-10
ENSDARG00000018146	45.2541	5.89554	0.795116	2.74485e-11	4.45338e-10
ENSDARG00000099269	51.8253	6.26932	0.859637	2.91129e-11	4.70297e-10
ENSDARG00000017084	59.2131	4.89912	0.642093	3.16634e-11	5.06629e-10
ENSDARG00000038577	50.7563	5.79116	0.78006	3.16412e-11	5.06629e-10
ENSDARG00000104082	172.103	-3.74162	0.478656	3.17693e-11	5.06629e-10
ENSDARG00000054272	2576.52	-1.8346	0.229607	3.25905e-11	5.17513e-10
ENSDARG00000088383	63.8047	5.49739	0.733865	3.36577e-11	5.32195e-10
ENSDARG00000003054	163.075	-4.32813	0.561299	3.72232e-11	5.86089e-10
ENSDARG00000039887	180.304	3.92683	0.50541	3.78153e-11	5.92911e-10
ENSDARG00000013207	377.238	-2.74279	0.347707	4.32688e-11	6.75578e-10
ENSDARG00000055792	107.939	3.83494	0.49455	4.7099e-11	7.32317e-10
ENSDARG00000102645	316.89	-3.97589	0.514219	4.80995e-11	7.4477e-10
ENSDARG00000060494	268.571	3.60556	0.463398	4.85636e-11	7.48849e-10
ENSDARG00000068214	640.4	3.17608	0.406033	5.20313e-11	7.99018e-10
ENSDARG00000010244	233.499	4.08391	0.530974	5.82747e-11	8.91227e-10
ENSDARG00000005772	615.953	-2.49819	0.317757	6.31241e-11	9.61452e-10
ENSDARG00000030411	1842.4	4.05217	0.52769	6.65054e-11	1.00868e-09
ENSDARG00000080562	140.001	-4.82667	0.63963	6.67654e-11	1.00868e-09
ENSDARG00000086917	1108.54	5.46666	0.740658	8.01749e-11	1.20638e-09
ENSDARG00000092870	82.577	4.77388	0.634751	8.72401e-11	1.30742e-09
ENSDARG00000096322	353.086	-4.17367	0.54885	1.02514e-10	1.53018e-09
ENSDARG00000076790	1508.8	4.58911	0.609159	1.02993e-10	1.5312e-09
ENSDARG00000026582	61.1457	5.20034	0.702168	1.05689e-10	1.56505e-09
ENSDARG00000075823	299.898	-3.38999	0.439862	1.06539e-10	1.57139e-09
ENSDARG00000023220	110.89	5.12392	0.690643	1.08937e-10	1.60045e-09
ENSDARG00000009493	205.991	-2.5064	0.321759	1.11458e-10	1.63106e-09
ENSDARG00000068680	101.647	6.04597	0.84311	1.13136e-10	1.64783e-09
ENSDARG00000071518	148.956	-3.2667	0.423525	1.13487e-10	1.64783e-09
ENSDARG00000012387	106.535	4.335	0.573275	1.16253e-10	1.68145e-09
ENSDARG00000042933	228.659	-2.59108	0.333791	1.30477e-10	1.87989e-09
ENSDARG00000005230	168.172	4.04386	0.532674	1.31804e-10	1.8917e-09
ENSDARG00000051886	691.295	2.34618	0.301852	1.41127e-10	2.01775e-09
ENSDARG00000103433	2490.54	2.76481	0.357475	1.44219e-10	2.0541e-09
ENSDARG00000030349	391.535	4.39263	0.584416	1.52608e-10	2.16532e-09
ENSDARG00000013333	44.5961	5.77282	0.800805	1.5417e-10	2.17918e-09
ENSDARG00000074552	119.027	4.90668	0.661681	1.57558e-10	2.21867e-09
ENSDARG00000035557	100.081	4.47377	0.597229	1.66178e-10	2.33125e-09
ENSDARG00000045402	71.2222	5.3388	0.730463	1.70109e-10	2.37747e-09
ENSDARG00000034105	304.836	-2.52637	0.326694	1.71775e-10	2.3918e-09
ENSDARG00000062933	65.9688	3.98791	0.528326	1.95895e-10	2.7175e-09
ENSDARG00000076001	159.922	-3.79944	0.50178	2.01228e-10	2.78114e-09
ENSDARG00000054433	56.5926	4.00488	0.531724	2.17591e-10	2.9962e-09
ENSDARG00000056141	52.4197	5.17644	0.70934	2.43618e-10	3.33825e-09
ENSDARG00000058369	139.886	-3.51123	0.462919	2.44221e-10	3.33825e-09
ENSDARG00000102128	210.638	-2.57306	0.335188	2.5936e-10	3.53225e-09
ENSDARG00000036593	417.252	-2.00609	0.260338	2.88953e-10	3.92097e-09
ENSDARG00000091131	273.102	-2.3903	0.311479	2.97519e-10	4.02257e-09
ENSDARG00000005799	39.0052	6.1384	0.87712	2.99732e-10	4.03786e-09
ENSDARG00000060081	201.252	-2.96226	0.389004	3.14128e-10	4.21658e-09
ENSDARG00000006019	104.969	4.70777	0.640603	3.46208e-10	4.63053e-09
ENSDARG00000004261	86.1459	4.5101	0.610754	3.50917e-10	4.67676e-09
ENSDARG00000039346	46.1269	5.17635	0.714997	3.70408e-10	4.91895e-09
ENSDARG00000007682	63.943	4.23223	0.570151	3.77476e-10	4.99504e-09
ENSDARG00000103791	594.54	2.78868	0.366753	3.91437e-10	5.16148e-09
ENSDARG00000060303	187.194	-3.36015	0.445571	3.93991e-10	5.17686e-09
ENSDARG00000010519	428.413	-2.3324	0.305565	4.23932e-10	5.55073e-09
ENSDARG00000067832	180.234	-3.5689	0.476067	4.53186e-10	5.91301e-09
ENSDARG00000014165	63.8659	4.66994	0.638451	4.71119e-10	6.12558e-09
ENSDARG00000068562	374.055	-2.28789	0.30022	4.7909e-10	6.20759e-09
ENSDARG00000074001	315.665	4.49695	0.612391	4.84768e-10	6.25943e-09
ENSDARG00000098935	127.672	2.68812	0.35443	4.88855e-10	6.29043e-09
ENSDARG00000042249	242.311	-3.75052	0.502993	5.10118e-10	6.54149e-09
ENSDARG00000095897	56.6251	4.94824	0.682938	5.13828e-10	6.56649e-09
ENSDARG00000068478	136.095	4.7714	0.656539	5.73214e-10	7.30041e-09
ENSDARG00000052856	610.695	-2.28131	0.300315	5.80523e-10	7.36835e-09
ENSDARG00000007385	229.565	3.30533	0.441153	6.00397e-10	7.59478e-09
ENSDARG00000020228	370.364	-2.84464	0.377183	6.04162e-10	7.61658e-09
ENSDARG00000019404	55.8462	6.38554	0.940179	6.35825e-10	7.98876e-09
ENSDARG00000011648	213.707	3.75431	0.505694	6.48135e-10	8.1161e-09
ENSDARG00000104537	166.678	4.9549	0.687871	6.90073e-10	8.61236e-09
ENSDARG00000021195	135.421	-2.94457	0.392024	7.06576e-10	8.78893e-09
ENSDARG00000069422	24.576	5.72479	0.818366	7.49314e-10	9.28958e-09
ENSDARG00000019181	4011.62	2.87457	0.382981	7.77635e-10	9.60876e-09
ENSDARG00000098674	146.874	-3.59152	0.484101	7.96719e-10	9.81208e-09
ENSDARG00000081103	31.059	6.19981	0.909355	8.55166e-10	1.04972e-08
ENSDARG00000042467	159.683	-3.09694	0.4155	9.67159e-10	1.1833e-08
ENSDARG00000016903	41.3108	4.69753	0.65163	9.77321e-10	1.19084e-08
ENSDARG00000032865	1167.51	-2.56876	0.3423	9.79704e-10	1.19084e-08
ENSDARG00000056167	94.5741	5.20365	0.734953	1.10053e-09	1.33337e-08
ENSDARG00000100553	235.889	2.04712	0.27199	1.1327e-09	1.3679e-08
ENSDARG00000030265	58.2281	4.74844	0.662073	1.18292e-09	1.42394e-08
ENSDARG00000082960	123.456	-4.73981	0.661148	1.22433e-09	1.46905e-08
ENSDARG00000011171	210.795	-3.07097	0.41369	1.24104e-09	1.48433e-08
ENSDARG00000099022	3407.82	3.37992	0.457918	1.29903e-09	1.54872e-08
ENSDARG00000075331	209.369	1.99232	0.265772	1.46644e-09	1.74274e-08
ENSDARG00000097897	208.421	2.84008	0.382604	1.49468e-09	1.77067e-08
ENSDARG00000077536	499.701	-2.18537	0.292259	1.52523e-09	1.80114e-08
ENSDARG00000021252	336.522	3.25115	0.441083	1.57685e-09	1.85622e-08
ENSDARG00000071015	341.213	-2.19484	0.293857	1.61766e-09	1.89827e-08
ENSDARG00000041417	132.276	3.543	0.483577	1.66621e-09	1.94912e-08
ENSDARG00000003693	65.3986	3.91173	0.537815	1.67332e-09	1.95131e-08
ENSDARG00000034897	2208.18	3.62435	0.496023	1.77839e-09	2.06738e-08
ENSDARG00000092610	27.3459	5.36666	0.770872	1.88014e-09	2.17888e-08
ENSDARG00000103919	629.159	4.11079	0.569012	1.89943e-09	2.19442e-08
ENSDARG00000039578	90.9208	4.51384	0.631328	1.94086e-09	2.23536e-08
ENSDARG00000054890	72.866	3.70023	0.508153	1.97948e-09	2.27283e-08
ENSDARG00000036438	30.1847	4.94112	0.700273	2.01218e-09	2.30235e-08
ENSDARG00000087324	377.453	4.75881	0.670706	2.01754e-09	2.30235e-08
ENSDARG00000055080	172.033	2.956	0.401173	2.05916e-09	2.34269e-08
ENSDARG00000094910	28.0819	5.82678	0.856293	2.18073e-09	2.47346e-08
ENSDARG00000019778	1310.56	2.63977	0.357388	2.27983e-09	2.57803e-08
ENSDARG00000063095	190.859	4.09612	0.569788	2.50425e-09	2.82325e-08
ENSDARG00000033175	36.5286	5.40573	0.782494	2.52304e-09	2.83585e-08
ENSDARG00000042708	93.8357	3.5865	0.494051	2.62247e-09	2.93876e-08
ENSDARG00000059455	100.167	-4.38298	0.614676	2.65801e-09	2.96968e-08
ENSDARG00000013979	58.8497	4.63426	0.654595	2.7054e-09	3.0136e-08
ENSDARG00000055996	1508.27	3.54395	0.488612	2.86574e-09	3.1827e-08
ENSDARG00000003403	191.654	-2.69492	0.366658	2.87847e-09	3.18735e-08
ENSDARG00000041435	938.865	3.81959	0.529705	2.93109e-09	3.23601e-08
ENSDARG00000015915	62.7385	4.83165	0.687707	2.95258e-09	3.25013e-08
ENSDARG00000036080	60.3002	3.80189	0.527837	3.1677e-09	3.46977e-08
ENSDARG00000036626	137.087	-3.6274	0.501865	3.17071e-09	3.46977e-08
ENSDARG00000097055	42.5235	3.45372	0.476412	3.21558e-09	3.50858e-08
ENSDARG00000056085	23.49	5.86777	0.874053	3.623e-09	3.93014e-08
ENSDARG00000074645	118.856	-3.59973	0.499025	3.62192e-09	3.93014e-08
ENSDARG00000101869	231.245	-2.83666	0.388584	3.76094e-09	4.06795e-08
ENSDARG00000007438	85.5668	3.5375	0.490228	3.785e-09	4.08214e-08
ENSDARG00000053129	35.107	5.55106	0.816122	3.91846e-09	4.2139e-08
ENSDARG00000023920	41.3335	3.99173	0.559185	4.07899e-09	4.37393e-08
ENSDARG00000068436	230.366	3.57244	0.496614	4.30591e-09	4.60403e-08
ENSDARG00000104701	350.209	-2.41537	0.330067	4.41632e-09	4.70859e-08
ENSDARG00000036456	419.916	-2.96366	0.407983	4.4396e-09	4.71993e-08
ENSDARG00000038870	1164.74	-2.40766	0.329083	4.48988e-09	4.75982e-08
ENSDARG00000033382	67.7349	4.31917	0.611124	4.53206e-09	4.79092e-08
ENSDARG00000006408	584.865	-2.51824	0.344788	4.58743e-09	4.83576e-08
ENSDARG00000069038	86.382	-3.29942	0.457244	4.75161e-09	4.99471e-08
ENSDARG00000062116	37.6398	4.61078	0.6584	4.80655e-09	5.03828e-08
ENSDARG00000073750	1677.52	4.03891	0.568284	4.83366e-09	5.05251e-08
ENSDARG00000094191	23.9744	5.49738	0.81114	5.11845e-09	5.33524e-08
ENSDARG00000055350	76.3134	-3.55683	0.496566	5.47013e-09	5.68593e-08
ENSDARG00000035914	28.2825	4.52706	0.646938	5.61757e-09	5.82297e-08
ENSDARG00000017235	684.842	3.62706	0.507711	5.842e-09	6.03883e-08
ENSDARG00000055874	683.822	-1.64982	0.225488	6.66083e-09	6.86623e-08
ENSDARG00000087226	152.679	-3.33444	0.465569	6.81258e-09	7.00331e-08
ENSDARG00000080775	130.41	-3.67952	0.517626	7.14938e-09	7.32935e-08
ENSDARG00000045487	209.204	4.25241	0.606752	7.5113e-09	7.67928e-08
ENSDARG00000074777	404.382	-2.29051	0.315698	7.57465e-09	7.72289e-08
ENSDARG00000037870	4728.06	2.88378	0.400883	7.9401e-09	8.07343e-08
ENSDARG00000075936	90.9875	-3.86694	0.548086	8.53924e-09	8.65904e-08
ENSDARG00000038185	26.9893	6.16506	0.954589	8.85694e-09	8.95686e-08
ENSDARG00000006588	69.4979	4.97714	0.728549	8.97835e-09	9.0551e-08
ENSDARG00000044954	205.623	-3.69187	0.521958	9.09481e-09	9.14783e-08
ENSDARG00000041433	196.215	3.73845	0.529101	9.13104e-09	9.15958e-08
ENSDARG00000103811	182.756	-3.20599	0.449323	9.30053e-09	9.30459e-08
ENSDARG00000031756	583.697	2.16003	0.298458	9.33496e-09	9.31406e-08
ENSDARG00000103682	85.4094	3.65985	0.519643	1.16655e-08	1.16084e-07
ENSDARG00000086842	79.9741	4.39188	0.635022	1.19585e-08	1.18683e-07
ENSDARG00000013966	23.1875	4.87824	0.716153	1.20465e-08	1.19013e-07
ENSDARG00000017844	52.3681	4.02827	0.577072	1.20556e-08	1.19013e-07
ENSDARG00000059906	403.138	3.5377	0.501766	1.25252e-08	1.23323e-07
ENSDARG00000009018	147.268	4.30623	0.621852	1.26037e-08	1.23769e-07
ENSDARG00000003920	416.667	2.99815	0.421485	1.29951e-08	1.27278e-07
ENSDARG00000033845	361.914	-2.14336	0.298061	1.32346e-08	1.29285e-07
ENSDARG00000055154	198.146	-2.89525	0.406546	1.32854e-08	1.29442e-07
ENSDARG00000052746	112.269	4.65265	0.680231	1.4038e-08	1.36418e-07
ENSDARG00000099351	207.43	4.09554	0.589611	1.41595e-08	1.37242e-07
ENSDARG00000043323	198.335	3.44322	0.488742	1.42861e-08	1.3811e-07
ENSDARG00000017775	126.475	5.24197	0.783593	1.47522e-08	1.42248e-07
ENSDARG00000010965	98.7215	3.16967	0.448492	1.56509e-08	1.50524e-07
ENSDARG00000103364	136.96	4.04329	0.582578	1.57103e-08	1.50707e-07
ENSDARG00000013704	248.282	-2.30879	0.323021	1.65196e-08	1.58064e-07
ENSDARG00000031819	144.417	3.82368	0.548757	1.66661e-08	1.58838e-07
ENSDARG00000038290	26.9015	4.12078	0.595634	1.66857e-08	1.58838e-07
ENSDARG00000045877	74.4772	4.46301	0.651524	1.71371e-08	1.62721e-07
ENSDARG00000037203	39.0302	4.30749	0.626157	1.72767e-08	1.6363e-07
ENSDARG00000057853	190.26	3.55848	0.508496	1.78238e-08	1.68385e-07
ENSDARG00000075706	466.433	-2.2461	0.314614	1.82058e-08	1.71559e-07
ENSDARG00000020573	79.6342	2.86771	0.405323	1.89807e-08	1.7841e-07
ENSDARG00000104458	95.3782	4.52207	0.663527	2.00512e-08	1.87999e-07
ENSDARG00000005791	939.672	2.39749	0.337096	2.02024e-08	1.88647e-07
ENSDARG00000070447	36.491	4.05217	0.587042	2.02214e-08	1.88647e-07
ENSDARG00000036168	151.541	-3.56557	0.511008	2.04658e-08	1.90451e-07
ENSDARG00000061352	103.544	-3.5406	0.507479	2.10889e-08	1.95761e-07
ENSDARG00000008748	84.687	3.95298	0.572482	2.23754e-08	2.06287e-07
ENSDARG00000011921	56.7131	3.1929	0.455186	2.23886e-08	2.06287e-07
ENSDARG00000063912	4471.06	3.88051	0.560978	2.22954e-08	2.06287e-07
ENSDARG00000051888	55.6536	4.32331	0.632504	2.29299e-08	2.10754e-07
ENSDARG00000098670	106.954	3.99267	0.579281	2.33118e-08	2.13737e-07
ENSDARG00000035622	283.858	2.92805	0.416204	2.41183e-08	2.20589e-07
ENSDARG00000023290	198.107	3.07569	0.438319	2.43271e-08	2.21414e-07
ENSDARG00000105214	168.968	-3.75879	0.542828	2.42861e-08	2.21414e-07
ENSDARG00000104069	59.227	3.11859	0.444893	2.47011e-08	2.24271e-07
ENSDARG00000028581	46.0548	4.87929	0.728094	2.52742e-08	2.28918e-07
ENSDARG00000079610	516.805	-2.10302	0.296234	2.63957e-08	2.38496e-07
ENSDARG00000088091	164.641	4.34915	0.638866	2.67824e-08	2.41406e-07
ENSDARG00000028336	46.1964	5.37366	0.820191	2.83511e-08	2.54929e-07
ENSDARG00000002593	60.8277	5.48929	0.842557	2.85772e-08	2.56345e-07
ENSDARG00000020101	79.7272	2.77377	0.394742	2.88284e-08	2.57978e-07
ENSDARG00000019444	36.9492	4.55541	0.674526	2.91033e-08	2.59815e-07
ENSDARG00000004634	235.017	-3.35625	0.482817	3.01848e-08	2.68827e-07
ENSDARG00000102975	83.3599	4.60813	0.68415	3.04433e-08	2.70484e-07
ENSDARG00000069801	3060.83	4.00624	0.584961	3.10769e-08	2.75457e-07
ENSDARG00000023852	77.4035	4.48381	0.663609	3.15203e-08	2.78726e-07
ENSDARG00000042133	51.366	4.78642	0.715526	3.17248e-08	2.79871e-07
ENSDARG00000005754	237.581	2.07415	0.293173	3.19597e-08	2.81278e-07
ENSDARG00000012113	19.7697	6.04327	0.960346	3.22517e-08	2.82515e-07
ENSDARG00000073874	114.067	6.05212	0.962295	3.22074e-08	2.82515e-07
ENSDARG00000007461	75.6485	-3.54387	0.512597	3.28217e-08	2.86835e-07
ENSDARG00000086658	528.998	5.29219	0.80777	3.3091e-08	2.88512e-07
ENSDARG00000032705	317.177	-1.89114	0.267062	3.35071e-08	2.9146e-07
ENSDARG00000059327	158.453	-2.94068	0.421181	3.48701e-08	3.0261e-07
ENSDARG00000034734	22.6506	4.49876	0.667643	3.49684e-08	3.02759e-07
ENSDARG00000101859	381.047	-2.64318	0.377223	3.65187e-08	3.15449e-07
ENSDARG00000000086	138.768	-2.75161	0.393348	3.66665e-08	3.15995e-07
ENSDARG00000052465	101.153	-3.68606	0.536599	3.85981e-08	3.31875e-07
ENSDARG00000019732	52.2021	4.51909	0.674299	4.34202e-08	3.72479e-07
ENSDARG00000059600	105.652	-2.9603	0.426347	4.51048e-08	3.86043e-07
ENSDARG00000014962	206.853	-2.30627	0.329119	4.53847e-08	3.87549e-07
ENSDARG00000091801	73.9483	3.50603	0.510414	4.655e-08	3.96592e-07
ENSDARG00000030440	165.856	3.77434	0.5528	4.68414e-08	3.98165e-07
ENSDARG00000069792	871.011	5.03396	0.766901	4.84063e-08	4.10532e-07
ENSDARG00000001888	182.349	-3.29211	0.477969	5.0125e-08	4.24145e-07
ENSDARG00000004581	253.307	-3.44232	0.501457	5.10825e-08	4.31269e-07
ENSDARG00000035715	865.162	2.48512	0.3564	5.18513e-08	4.36771e-07
ENSDARG00000015355	260.889	3.61865	0.529542	5.3107e-08	4.46342e-07
ENSDARG00000030957	53.3975	3.11825	0.452161	5.5071e-08	4.61808e-07
ENSDARG00000060372	95.928	-3.86163	0.569721	5.97853e-08	5.00217e-07
ENSDARG00000022213	15.409	5.55697	0.873432	6.46444e-08	5.39662e-07
ENSDARG00000104042	83.4421	4.71044	0.714349	6.71258e-08	5.59126e-07
ENSDARG00000055540	233.811	-2.6203	0.37865	6.86796e-08	5.70795e-07
ENSDARG00000099439	47.5069	3.89537	0.577147	7.00294e-08	5.8072e-07
ENSDARG00000034777	40.7575	4.92443	0.753639	7.06229e-08	5.84343e-07
ENSDARG00000001014	302.813	-1.9368	0.277885	7.27685e-08	6.00763e-07
ENSDARG00000055429	433.789	-2.25668	0.325036	7.39633e-08	6.09279e-07
ENSDARG00000003820	53.1314	4.34862	0.653495	7.563e-08	6.21637e-07
ENSDARG00000036844	101.127	-3.59518	0.529905	7.62926e-08	6.25705e-07
ENSDARG00000063917	791.197	3.48106	0.51196	7.72672e-08	6.32309e-07
ENSDARG00000086269	150.901	-3.46524	0.509598	7.82285e-08	6.38774e-07
ENSDARG00000045976	113.745	-3.58893	0.529435	7.99048e-08	6.51037e-07
ENSDARG00000097528	50.0853	3.82051	0.566681	8.02089e-08	6.52091e-07
ENSDARG00000079274	95.6575	5.24095	0.815599	8.10765e-08	6.57712e-07
ENSDARG00000038672	123.212	-3.42777	0.504833	8.69626e-08	7.03931e-07
ENSDARG00000056549	39.9892	4.99942	0.772978	9.55698e-08	7.71929e-07
ENSDARG00000103802	119.505	-2.56908	0.373554	9.60399e-08	7.7405e-07
ENSDARG00000053370	122.845	3.62308	0.537072	9.65792e-08	7.76719e-07
ENSDARG00000096632	34.8706	3.77831	0.562204	9.72439e-08	7.80383e-07
ENSDARG00000043334	38.349	4.03476	0.604803	1.00936e-07	8.08276e-07
ENSDARG00000021805	138.272	-3.216	0.473238	1.01769e-07	8.13199e-07
ENSDARG00000025397	43.834	4.65496	0.712005	1.0559e-07	8.41925e-07
ENSDARG00000006878	137.441	-2.59691	0.37895	1.11821e-07	8.89713e-07
ENSDARG00000009505	312.371	2.68764	0.392779	1.12646e-07	8.94366e-07
ENSDARG00000035327	173.542	3.34554	0.494667	1.13033e-07	8.95534e-07
ENSDARG00000078535	94.1769	-3.44746	0.510893	1.13839e-07	9.00008e-07
ENSDARG00000026829	45.4869	4.20121	0.634475	1.14379e-07	9.02369e-07
ENSDARG00000069826	494.043	5.23699	0.8225	1.18067e-07	9.29496e-07
ENSDARG00000045618	287.788	3.74891	0.559927	1.19184e-07	9.36318e-07
ENSDARG00000010113	84.2248	4.12215	0.622203	1.23505e-07	9.68227e-07
ENSDARG00000035871	5141.4	3.66582	0.546955	1.24401e-07	9.71916e-07
ENSDARG00000090697	60.3636	4.55182	0.696419	1.24497e-07	9.71916e-07
ENSDARG00000032072	172.548	-3.32382	0.492405	1.26177e-07	9.82974e-07
ENSDARG00000061746	226.52	-3.06212	0.451481	1.2759e-07	9.91916e-07
ENSDARG00000040738	14.4613	5.92712	0.971124	1.28576e-07	9.975e-07
ENSDARG00000055360	81.0262	3.47278	0.516773	1.34265e-07	1.03947e-06
ENSDARG00000017741	59.3194	4.15363	0.630556	1.52745e-07	1.1801e-06
ENSDARG00000021509	106.064	3.40014	0.506727	1.54415e-07	1.19054e-06
ENSDARG00000077850	83.4094	3.61277	0.541034	1.55549e-07	1.1968e-06
ENSDARG00000075034	59.2648	4.90444	0.765036	1.61355e-07	1.23892e-06
ENSDARG00000099220	62.4381	-4.30435	0.657369	1.6285e-07	1.24784e-06
ENSDARG00000103277	219.229	3.37026	0.502755	1.66013e-07	1.26946e-06
ENSDARG00000057698	114.857	3.48923	0.522581	1.77202e-07	1.35225e-06
ENSDARG00000070833	44.5168	4.89848	0.765851	1.78794e-07	1.36162e-06
ENSDARG00000003421	174.972	-2.71388	0.400799	1.81344e-07	1.37823e-06
ENSDARG00000033140	379.79	-2.49852	0.367918	1.8386e-07	1.3945e-06
ENSDARG00000078109	51.5511	3.70094	0.557635	1.86394e-07	1.41086e-06
ENSDARG00000034187	174.971	3.02137	0.448956	1.89531e-07	1.4317e-06
ENSDARG00000104024	24.5793	4.08479	0.62201	1.9036e-07	1.43506e-06
ENSDARG00000055475	529.672	2.57925	0.380682	1.93956e-07	1.45922e-06
ENSDARG00000027200	19.679	4.64624	0.72131	1.99913e-07	1.50101e-06
ENSDARG00000006758	97.2863	3.03702	0.452032	2.01952e-07	1.51327e-06
ENSDARG00000068100	129.894	-3.41757	0.512606	2.03294e-07	1.52028e-06
ENSDARG00000038615	84.4451	3.40471	0.510617	2.04736e-07	1.528e-06
ENSDARG00000015930	37.2183	3.39786	0.509825	2.1045e-07	1.56751e-06
ENSDARG00000054213	820.91	-2.02573	0.297461	2.13468e-07	1.58682e-06
ENSDARG00000033012	309.107	-1.95101	0.286311	2.15429e-07	1.59821e-06
ENSDARG00000003058	22.1927	5.4851	0.887667	2.27171e-07	1.68198e-06
ENSDARG00000027423	97.6348	-3.90536	0.59452	2.33329e-07	1.72415e-06
ENSDARG00000006370	81.7606	3.90875	0.59577	2.45251e-07	1.80775e-06
ENSDARG00000098583	74.9507	4.00648	0.612324	2.45612e-07	1.80775e-06
ENSDARG00000044684	279.077	5.4878	0.891978	2.64844e-07	1.94547e-06
ENSDARG00000074079	72.767	-3.38513	0.510473	2.66939e-07	1.95701e-06
ENSDARG00000093303	118.651	-2.9096	0.43477	2.68191e-07	1.96234e-06
ENSDARG00000021124	1713.47	2.44299	0.362793	2.82768e-07	2.05902e-06
ENSDARG00000025797	85.2419	-3.0004	0.44959	2.82835e-07	2.05902e-06
ENSDARG00000067741	24.2247	4.91219	0.7773	2.8306e-07	2.05902e-06
ENSDARG00000080337	199218	2.27989	0.338103	2.93681e-07	2.12857e-06
ENSDARG00000098334	47.2754	3.90213	0.597136	2.93763e-07	2.12857e-06
ENSDARG00000097797	42.4052	4.96888	0.789554	3.02754e-07	2.18947e-06
ENSDARG00000057676	22.7072	4.4936	0.70279	3.39977e-07	2.4539e-06
ENSDARG00000079731	126.315	-2.51614	0.37558	3.41169e-07	2.45775e-06
ENSDARG00000088823	1504.62	4.62394	0.726791	3.43252e-07	2.468e-06
ENSDARG00000070866	55.322	3.48255	0.529657	3.53752e-07	2.5386e-06
ENSDARG00000002344	275.912	2.47219	0.369232	3.60636e-07	2.58303e-06
ENSDARG00000007276	109.448	4.74879	0.751222	3.6559e-07	2.6135e-06
ENSDARG00000052840	19.042	5.89242	0.993648	3.67444e-07	2.62173e-06
ENSDARG00000101465	18.3289	5.49932	0.904355	3.93088e-07	2.79935e-06
ENSDARG00000041332	16.4935	5.44282	0.893013	4.08291e-07	2.90208e-06
ENSDARG00000100825	184.017	3.32805	0.506126	4.09874e-07	2.90779e-06
ENSDARG00000013863	294.393	3.11393	0.471735	4.19563e-07	2.97088e-06
ENSDARG00000013804	34.8141	4.49999	0.70786	4.25934e-07	3.00459e-06
ENSDARG00000055589	46.9675	4.15301	0.645767	4.25778e-07	3.00459e-06
ENSDARG00000055524	20.2462	5.3687	0.878591	4.33808e-07	3.05436e-06
ENSDARG00000041878	26.9709	4.17732	0.65084	4.48217e-07	3.14987e-06
ENSDARG00000007791	44.7453	4.12711	0.642055	4.49177e-07	3.15068e-06
ENSDARG00000003127	13.7634	5.14988	0.833924	4.50676e-07	3.15526e-06
ENSDARG00000009488	93.856	-3.17304	0.482216	4.582e-07	3.20193e-06
ENSDARG00000003449	149.273	-2.71004	0.408517	4.6451e-07	3.23996e-06
ENSDARG00000016393	37.9054	3.33585	0.508982	4.69874e-07	3.27126e-06
ENSDARG00000089665	69.1934	-4.06945	0.633381	4.9251e-07	3.42247e-06
ENSDARG00000014577	27.2877	3.78058	0.583688	4.93504e-07	3.423e-06
ENSDARG00000069600	159.465	2.66779	0.402521	4.99335e-07	3.45702e-06
ENSDARG00000014053	126.402	2.17002	0.325132	5.01773e-07	3.46746e-06
ENSDARG00000007323	81.5093	2.87014	0.434787	5.12433e-07	3.52807e-06
ENSDARG00000013144	341.479	2.52441	0.380241	5.11504e-07	3.52807e-06
ENSDARG00000043484	157.996	2.93839	0.446448	5.53277e-07	3.80226e-06
ENSDARG00000062630	78.1816	-3.80858	0.590381	5.66907e-07	3.88876e-06
ENSDARG00000003705	150.96	3.08454	0.470266	5.6956e-07	3.89979e-06
ENSDARG00000103288	48.0204	4.66182	0.743511	5.78525e-07	3.95392e-06
ENSDARG00000095908	149.916	3.88517	0.604412	6.03117e-07	4.11446e-06
ENSDARG00000054271	55.4755	3.51455	0.542399	6.44789e-07	4.39072e-06
ENSDARG00000087301	117.332	4.0157	0.628626	6.68256e-07	4.54223e-06
ENSDARG00000032970	134.541	3.14546	0.481944	6.70844e-07	4.55153e-06
ENSDARG00000044153	59.9454	3.27816	0.503755	6.75509e-07	4.57486e-06
ENSDARG00000069846	23.0705	5.13429	0.840819	7.02812e-07	4.75115e-06
ENSDARG00000045898	32.2631	3.51902	0.54443	7.12846e-07	4.81027e-06
ENSDARG00000089917	69.4283	-4.04294	0.634866	7.34318e-07	4.94621e-06
ENSDARG00000101458	127.606	2.86098	0.436967	7.40459e-07	4.97859e-06
ENSDARG00000041887	190.753	-2.20592	0.333567	7.44022e-07	4.99355e-06
ENSDARG00000001754	377.28	-1.99407	0.300761	7.45517e-07	4.9946e-06
ENSDARG00000040407	65.5758	2.40586	0.364969	7.59485e-07	5.07906e-06
ENSDARG00000070985	31.4222	4.85829	0.787226	7.74207e-07	5.16825e-06
ENSDARG00000036944	145.098	-3.5501	0.550772	7.76859e-07	5.1767e-06
ENSDARG00000011201	1624.17	1.9809	0.29915	7.94112e-07	5.27283e-06
ENSDARG00000076799	67.3256	4.08602	0.643697	7.93351e-07	5.27283e-06
ENSDARG00000008735	112.254	4.79028	0.774587	8.01006e-07	5.29975e-06
ENSDARG00000022438	54.5039	5.16148	0.84953	8.00977e-07	5.29975e-06
ENSDARG00000093382	37.2785	3.89842	0.611021	8.09484e-07	5.34636e-06
ENSDARG00000021891	16.1116	5.11134	0.840199	8.40333e-07	5.5403e-06
ENSDARG00000020258	50.6562	3.21512	0.496016	8.4741e-07	5.56594e-06
ENSDARG00000045399	88.6487	3.25365	0.502371	8.4707e-07	5.56594e-06
ENSDARG00000059722	132.403	-2.81299	0.430616	8.48696e-07	5.56594e-06
ENSDARG00000041592	55.0035	4.50433	0.721199	8.55128e-07	5.59828e-06
ENSDARG00000029818	175.15	2.00811	0.304146	8.91975e-07	5.82928e-06
ENSDARG00000089877	215.087	4.12275	0.652282	9.00995e-07	5.87793e-06
ENSDARG00000104835	90.8562	-3.03865	0.467824	9.05471e-07	5.89682e-06
ENSDARG00000023160	19.8726	4.77912	0.776033	9.55931e-07	6.2146e-06
ENSDARG00000091771	69.857	3.81212	0.59903	9.94192e-07	6.4521e-06
ENSDARG00000091631	16.6837	4.39267	0.703269	1.00206e-06	6.49187e-06
ENSDARG00000103953	317.493	-2.32812	0.355047	1.00683e-06	6.51146e-06
ENSDARG00000040439	527.854	3.37476	0.525073	1.0444e-06	6.74273e-06
ENSDARG00000034146	19.605	5.2226	0.868983	1.04715e-06	6.74881e-06
ENSDARG00000077372	51.8452	4.6671	0.756185	1.05351e-06	6.77811e-06
ENSDARG00000028017	53.6163	4.72952	0.768521	1.06405e-06	6.83413e-06
ENSDARG00000053058	90.8147	4.28109	0.684028	1.08122e-06	6.9325e-06
ENSDARG00000068940	115.243	3.87821	0.611998	1.09451e-06	7.00566e-06
ENSDARG00000101341	13.0311	5.46183	0.923667	1.11289e-06	7.1111e-06
ENSDARG00000098250	86.2752	4.60228	0.745111	1.13178e-06	7.21945e-06
ENSDARG00000078772	45.8975	3.34949	0.522168	1.16221e-06	7.40094e-06
ENSDARG00000043865	20.1932	5.0682	0.839057	1.17532e-06	7.47166e-06
ENSDARG00000102121	22.3867	4.95075	0.815966	1.23733e-06	7.85247e-06
ENSDARG00000004502	113.796	-2.71917	0.419335	1.25274e-06	7.93679e-06
ENSDARG00000103144	167.669	-3.11916	0.485483	1.34239e-06	8.49037e-06
ENSDARG00000045296	62.2553	4.34171	0.699134	1.34751e-06	8.49391e-06
ENSDARG00000090552	25.2413	4.71939	0.771373	1.34571e-06	8.49391e-06
ENSDARG00000036855	37.0814	3.60935	0.568376	1.35622e-06	8.53441e-06
ENSDARG00000008398	88.0621	-3.20824	0.501107	1.43647e-06	9.02418e-06
ENSDARG00000069175	78.6977	3.00341	0.467214	1.44886e-06	9.08676e-06
ENSDARG00000086912	930.276	5.371	0.911299	1.50786e-06	9.44091e-06
ENSDARG00000095553	16.9154	5.58413	0.96171	1.52503e-06	9.53243e-06
ENSDARG00000076888	115.294	-3.05296	0.476126	1.54532e-06	9.64311e-06
ENSDARG00000007824	1212.2	-1.85555	0.284195	1.57451e-06	9.80885e-06
ENSDARG00000099014	19.0539	4.90183	0.811586	1.58805e-06	9.87668e-06
ENSDARG00000016904	27.28	4.49186	0.730789	1.6083e-06	9.98598e-06
ENSDARG00000057882	25.0199	4.87949	0.807352	1.61176e-06	9.99086e-06
ENSDARG00000011777	94.718	-3.0206	0.471804	1.69374e-06	1.04642e-05
ENSDARG00000019362	13.2821	4.70618	0.773568	1.69327e-06	1.04642e-05
ENSDARG00000042667	17.3624	5.14942	0.865923	1.7422e-06	1.07281e-05
ENSDARG00000103163	12.1872	5.34868	0.910161	1.74048e-06	1.07281e-05
ENSDARG00000097902	13.9521	5.59749	0.969575	1.76986e-06	1.08805e-05
ENSDARG00000031100	574.287	-2.72926	0.424666	1.81742e-06	1.11545e-05
ENSDARG00000100697	281.223	3.1421	0.493167	1.8653e-06	1.14295e-05
ENSDARG00000035187	71.0733	-3.62713	0.576156	1.89234e-06	1.15763e-05
ENSDARG00000089390	75.991	-4.28589	0.695067	1.91294e-06	1.16831e-05
ENSDARG00000104149	14.1754	5.23194	0.887311	1.97702e-06	1.20547e-05
ENSDARG00000036175	391.085	-2.2103	0.341964	2.01443e-06	1.22628e-05
ENSDARG00000045367	38.1187	5.35378	0.915536	2.02483e-06	1.23061e-05
ENSDARG00000093844	48.2058	5.37361	0.920647	2.06318e-06	1.25188e-05
ENSDARG00000023724	209.086	-2.85514	0.446674	2.07237e-06	1.25541e-05
ENSDARG00000005738	74.7008	2.9426	0.461329	2.1088e-06	1.27345e-05
ENSDARG00000099380	1782.04	2.30474	0.357434	2.10897e-06	1.27345e-05
ENSDARG00000037415	90.3139	-3.86281	0.619497	2.12553e-06	1.28137e-05
ENSDARG00000043313	767.604	-1.46011	0.224411	2.16903e-06	1.30309e-05
ENSDARG00000060330	40.6153	3.49543	0.55523	2.17081e-06	1.30309e-05
ENSDARG00000102447	101.041	-2.87009	0.449649	2.17203e-06	1.30309e-05
ENSDARG00000009031	125.807	-2.58945	0.404194	2.29794e-06	1.37641e-05
ENSDARG00000042864	18.56	4.56353	0.751977	2.32014e-06	1.38748e-05
ENSDARG00000070658	90.1548	-4.10952	0.665838	2.33405e-06	1.39245e-05
ENSDARG00000087732	843.973	-2.80449	0.439598	2.33591e-06	1.39245e-05
ENSDARG00000036500	24.5444	4.33516	0.708871	2.43928e-06	1.45175e-05
ENSDARG00000104517	66.8669	4.53619	0.747802	2.45854e-06	1.46089e-05
ENSDARG00000014587	97.4264	3.13173	0.494788	2.46725e-06	1.46373e-05
ENSDARG00000093851	82.8131	-3.66996	0.58767	2.49016e-06	1.47498e-05
ENSDARG00000039493	35.7128	3.95433	0.639432	2.62832e-06	1.55326e-05
ENSDARG00000087402	270.656	-1.87741	0.291065	2.63066e-06	1.55326e-05
ENSDARG00000099805	50.5667	3.4899	0.557483	2.73535e-06	1.61253e-05
ENSDARG00000069831	19.2217	5.29396	0.910706	2.78443e-06	1.63887e-05
ENSDARG00000078134	67.0484	5.90715	1.06881	2.79909e-06	1.64491e-05
ENSDARG00000036834	271.625	4.15137	0.676968	2.82569e-06	1.65793e-05
ENSDARG00000008867	59.276	3.18694	0.505953	2.8578e-06	1.67414e-05
ENSDARG00000012519	187.111	-2.18959	0.341583	2.89681e-06	1.69433e-05
ENSDARG00000013478	105.194	3.27334	0.521138	2.95672e-06	1.72667e-05
ENSDARG00000012682	63.7585	3.23948	0.515654	3.02939e-06	1.76634e-05
ENSDARG00000099092	148.306	-4.17441	0.68361	3.21439e-06	1.87128e-05
ENSDARG00000099624	97.8944	2.64263	0.416273	3.23016e-06	1.87753e-05
ENSDARG00000096003	83.5697	3.83413	0.621184	3.26624e-06	1.89555e-05
ENSDARG00000092112	43.2914	4.03305	0.657718	3.29887e-06	1.91151e-05
ENSDARG00000078694	155.76	-2.88039	0.456151	3.35456e-06	1.94077e-05
ENSDARG00000017454	73.6542	2.94529	0.467138	3.38523e-06	1.95548e-05
ENSDARG00000078686	326.437	-1.80984	0.282068	3.39441e-06	1.95775e-05
ENSDARG00000086224	75.9129	-3.53312	0.568158	3.40406e-06	1.96029e-05
ENSDARG00000045442	55.6117	4.39521	0.727661	3.54292e-06	2.03711e-05
ENSDARG00000043402	13.126	5.27832	0.914133	3.56826e-06	2.04853e-05
ENSDARG00000007347	19.9136	4.30255	0.710429	3.66694e-06	2.10195e-05
ENSDARG00000076978	15.2829	5.06567	0.866966	3.70312e-06	2.11943e-05
ENSDARG00000002217	58.6885	3.60409	0.581967	3.71134e-06	2.12088e-05
ENSDARG00000103799	178.658	2.42241	0.381682	3.79666e-06	2.16632e-05
ENSDARG00000087647	205.16	1.94162	0.30414	3.93271e-06	2.24052e-05
ENSDARG00000074229	411.404	-1.75678	0.274612	3.93958e-06	2.24101e-05
ENSDARG00000069624	17.9886	5.13108	0.883465	3.9793e-06	2.26017e-05
ENSDARG00000099195	14.6592	5.67473	1.0172	4.04169e-06	2.29211e-05
ENSDARG00000079889	156.193	-3.97631	0.650774	4.05006e-06	2.29337e-05
ENSDARG00000054152	107.09	-4.19467	0.69192	4.09634e-06	2.31607e-05
ENSDARG00000053862	145.666	5.74174	1.03678	4.16593e-06	2.35185e-05
ENSDARG00000096721	38.0554	4.42796	0.737593	4.21834e-06	2.37784e-05
ENSDARG00000035136	238.239	3.14427	0.504239	4.44512e-06	2.50189e-05
ENSDARG00000056903	12.4128	5.01339	0.86026	4.45434e-06	2.50331e-05
ENSDARG00000036040	25.2607	3.55755	0.576483	4.47144e-06	2.50914e-05
ENSDARG00000098801	113.351	-2.89148	0.461443	4.53538e-06	2.5412e-05
ENSDARG00000045490	20.628	4.88251	0.832601	4.58888e-06	2.56732e-05
ENSDARG00000099517	18.1006	4.53405	0.760709	4.64732e-06	2.59612e-05
ENSDARG00000009346	270.929	-2.40755	0.38121	4.68799e-06	2.61493e-05
ENSDARG00000100013	351.294	-1.50591	0.235889	4.77829e-06	2.66131e-05
ENSDARG00000045359	18.4007	4.37929	0.730872	4.84861e-06	2.69645e-05
ENSDARG00000076170	68.3324	2.8318	0.45254	5.0235e-06	2.78956e-05
ENSDARG00000099749	27.4276	3.92816	0.646353	5.25419e-06	2.91332e-05
ENSDARG00000068708	77.5416	3.69399	0.603609	5.31074e-06	2.94032e-05
ENSDARG00000088817	90.733	-3.11536	0.501618	5.34616e-06	2.95554e-05
ENSDARG00000100630	77.1781	4.50748	0.758584	5.39524e-06	2.97826e-05
ENSDARG00000062973	59.3277	3.44287	0.559188	5.50042e-06	3.03183e-05
ENSDARG00000051879	69.2359	-3.91844	0.645688	5.61065e-06	3.08803e-05
ENSDARG00000096920	189.377	-2.45769	0.391245	5.63946e-06	3.09932e-05
ENSDARG00000009982	101.717	-2.51897	0.401514	5.6989e-06	3.12738e-05
ENSDARG00000042056	52.7783	4.6913	0.797677	5.76035e-06	3.15646e-05
ENSDARG00000036164	70.0429	2.55279	0.407301	5.78988e-06	3.16799e-05
ENSDARG00000099966	136.214	2.36744	0.376595	5.8013e-06	3.16959e-05
ENSDARG00000102632	255.796	2.4095	0.38357	5.8186e-06	3.1744e-05
ENSDARG00000060029	17.0154	4.75617	0.811563	5.82982e-06	3.17473e-05
ENSDARG00000095157	58.1387	3.82779	0.629589	5.83623e-06	3.17473e-05
ENSDARG00000079470	66.279	-4.11347	0.683507	5.96661e-06	3.24093e-05
ENSDARG00000002600	60.9812	-3.16306	0.511577	6.10095e-06	3.30908e-05
ENSDARG00000075543	133.041	2.80609	0.450456	6.13127e-06	3.3207e-05
ENSDARG00000079455	47.903	4.01046	0.665286	6.41064e-06	3.46698e-05
ENSDARG00000093318	24.9476	5.00717	0.868579	6.42717e-06	3.47088e-05
ENSDARG00000105215	56.5552	-3.47618	0.567507	6.47527e-06	3.49181e-05
ENSDARG00000044246	82.8767	-4.09787	0.682116	6.49313e-06	3.49639e-05
ENSDARG00000077489	119.821	-3.00159	0.484628	6.56802e-06	3.53161e-05
ENSDARG00000014790	104.81	2.61871	0.419847	6.70622e-06	3.60074e-05
ENSDARG00000022684	249.918	5.01216	0.871452	6.85732e-06	3.67658e-05
ENSDARG00000003017	26.1006	4.71061	0.805874	6.86788e-06	3.67695e-05
ENSDARG00000003151	304.319	3.45172	0.564673	7.17816e-06	3.83757e-05
ENSDARG00000078785	132.356	4.25496	0.714847	7.32858e-06	3.91238e-05
ENSDARG00000104658	83.6027	-3.62999	0.5973	7.4114e-06	3.95094e-05
ENSDARG00000039185	162.683	5.13538	0.902195	7.49516e-06	3.98989e-05
ENSDARG00000033327	90.3403	-3.38336	0.553358	7.61813e-06	4.04958e-05
ENSDARG00000018319	519.033	-1.67421	0.265704	7.6391e-06	4.05495e-05
ENSDARG00000076128	415.193	-1.76559	0.280738	7.91978e-06	4.19797e-05
ENSDARG00000071396	62.7941	3.13037	0.509367	7.94273e-06	4.20416e-05
ENSDARG00000023495	84.9643	-2.78211	0.449886	8.32856e-06	4.40214e-05
ENSDARG00000017798	106.944	-3.14278	0.51245	8.50801e-06	4.49063e-05
ENSDARG00000025332	99.3117	2.75514	0.445669	8.60968e-06	4.53787e-05
ENSDARG00000058463	23.4737	4.74869	0.819653	8.67192e-06	4.56423e-05
ENSDARG00000038068	104.3	2.59425	0.418584	8.77723e-06	4.61295e-05
ENSDARG00000086169	58.6643	-3.60117	0.594773	8.78921e-06	4.61295e-05
ENSDARG00000076796	281.992	-1.70009	0.270909	8.90275e-06	4.66598e-05
ENSDARG00000098666	137.34	-2.59572	0.419005	8.92093e-06	4.66895e-05
ENSDARG00000020845	117.864	3.08337	0.502725	8.94202e-06	4.67343e-05
ENSDARG00000069817	576.476	4.69351	0.80889	9.04361e-06	4.71991e-05
ENSDARG00000005513	906.096	3.15022	0.514805	9.20027e-06	4.79497e-05
ENSDARG00000103054	114.162	-3.94385	0.659723	9.43674e-06	4.91135e-05
ENSDARG00000005456	103.559	-3.15656	0.516311	9.47064e-06	4.91529e-05
ENSDARG00000039499	31.2177	4.27457	0.723922	9.45755e-06	4.91529e-05
ENSDARG00000104111	17.7028	4.73801	0.819739	9.54369e-06	4.94632e-05
ENSDARG00000015592	87.4976	-3.72784	0.619552	9.62229e-06	4.98014e-05
ENSDARG00000060994	191.465	-2.38545	0.384718	9.92569e-06	5.13005e-05
ENSDARG00000001817	50.7222	-3.43785	0.567191	1.00172e-05	5.17019e-05
ENSDARG00000009252	62.4576	-3.10807	0.508603	1.00577e-05	5.18392e-05
ENSDARG00000032997	13.6682	4.79563	0.834108	1.02744e-05	5.28832e-05
ENSDARG00000075567	69.1922	-3.75862	0.627292	1.08265e-05	5.56478e-05
ENSDARG00000051798	255.645	-1.79745	0.288334	1.1115e-05	5.70522e-05
ENSDARG00000099256	112.805	-2.85734	0.466537	1.14094e-05	5.84832e-05
ENSDARG00000003008	54.6112	3.00323	0.492104	1.15874e-05	5.9314e-05
ENSDARG00000068974	20.3856	4.49749	0.774326	1.19699e-05	6.1188e-05
ENSDARG00000015978	168.934	3.17596	0.522979	1.19916e-05	6.1215e-05
ENSDARG00000045228	78.2363	3.26225	0.53849	1.21209e-05	6.17907e-05
ENSDARG00000102995	31.4824	3.6488	0.608854	1.21733e-05	6.1973e-05
ENSDARG00000099235	53.6092	2.70045	0.440304	1.22026e-05	6.20376e-05
ENSDARG00000076836	185.26	3.22588	0.53224	1.23263e-05	6.25814e-05
ENSDARG00000044601	65.4322	2.65645	0.433034	1.24964e-05	6.33587e-05
ENSDARG00000041314	58.0625	4.25306	0.7256	1.25814e-05	6.36166e-05
ENSDARG00000074129	24.4897	3.57615	0.595974	1.25771e-05	6.36166e-05
ENSDARG00000102878	74.745	3.03983	0.499891	1.28656e-05	6.48939e-05
ENSDARG00000104814	15.1017	5.25882	0.948714	1.28688e-05	6.48939e-05
ENSDARG00000010276	8.89914	5.34316	0.970331	1.29136e-05	6.5032e-05
ENSDARG00000070867	58.1542	4.56261	0.791094	1.36644e-05	6.87203e-05
ENSDARG00000091402	19.6811	3.601	0.602046	1.37643e-05	6.91296e-05
ENSDARG00000013522	216.275	-2.46214	0.401015	1.38469e-05	6.94509e-05
ENSDARG00000030116	46.224	3.31964	0.550785	1.3886e-05	6.95535e-05
ENSDARG00000034326	107.428	3.03494	0.500115	1.39594e-05	6.98207e-05
ENSDARG00000057913	256.707	2.45336	0.39962	1.39768e-05	6.98207e-05
ENSDARG00000017466	222.417	-1.91249	0.309138	1.42072e-05	7.0877e-05
ENSDARG00000003446	81.61	-4.22966	0.723544	1.4251e-05	7.10007e-05
ENSDARG00000077207	79.5201	-3.14379	0.519762	1.43481e-05	7.13891e-05
ENSDARG00000014554	12.9296	4.35864	0.749883	1.43983e-05	7.14574e-05
ENSDARG00000039626	32.1157	4.37377	0.752984	1.44001e-05	7.14574e-05
ENSDARG00000007745	102.887	3.27825	0.543949	1.44808e-05	7.1762e-05
ENSDARG00000029114	229.829	-1.98878	0.322036	1.46333e-05	7.2422e-05
ENSDARG00000055901	11.9872	4.96299	0.881628	1.47625e-05	7.29644e-05
ENSDARG00000018334	622.692	2.6348	0.431302	1.48965e-05	7.35292e-05
ENSDARG00000098600	16.2122	4.99623	0.890175	1.51729e-05	7.47949e-05
ENSDARG00000071684	113.363	-2.97709	0.491179	1.53475e-05	7.55554e-05
ENSDARG00000035625	25.6268	3.54386	0.593549	1.56108e-05	7.67507e-05
ENSDARG00000058451	1796.61	1.95948	0.317709	1.564e-05	7.67932e-05
ENSDARG00000068912	39.4356	4.33557	0.747227	1.58005e-05	7.74789e-05
ENSDARG00000037392	39.3435	3.82502	0.646576	1.58367e-05	7.75547e-05
ENSDARG00000009978	72.4028	4.93516	0.877259	1.58716e-05	7.76237e-05
ENSDARG00000055162	126.931	-2.77808	0.456906	1.60077e-05	7.81869e-05
ENSDARG00000033789	144.297	3.74196	0.63137	1.6346e-05	7.96788e-05
ENSDARG00000035129	21.0926	4.49748	0.781637	1.63558e-05	7.96788e-05
ENSDARG00000093936	38.8689	4.59805	0.803381	1.6587e-05	8.06996e-05
ENSDARG00000063054	115.606	-3.3712	0.562872	1.6637e-05	8.08372e-05
ENSDARG00000098355	25.7252	4.39058	0.759775	1.66853e-05	8.09666e-05
ENSDARG00000068179	75.6176	3.87289	0.656782	1.6754e-05	8.11946e-05
ENSDARG00000060115	81.5904	-3.09454	0.513218	1.68368e-05	8.14901e-05
ENSDARG00000040295	1021.56	2.12756	0.346583	1.71315e-05	8.28089e-05
ENSDARG00000101900	469.13	-1.72006	0.278983	1.77809e-05	8.58368e-05
ENSDARG00000002745	69.3681	4.15927	0.714265	1.79203e-05	8.63981e-05
ENSDARG00000063718	174.8	-2.56851	0.421991	1.79472e-05	8.6416e-05
ENSDARG00000069360	28.4586	4.05198	0.693653	1.85578e-05	8.92408e-05
ENSDARG00000019644	673.294	2.3789	0.390084	1.89415e-05	9.09686e-05
ENSDARG00000015524	39.6258	3.76582	0.639049	1.94747e-05	9.34092e-05
ENSDARG00000021987	787.066	-1.96167	0.319912	1.95523e-05	9.36609e-05
ENSDARG00000010021	56.3327	3.07189	0.511274	1.9583e-05	9.3688e-05
ENSDARG00000057167	42.3091	3.06355	0.509864	1.96962e-05	9.41089e-05
ENSDARG00000056453	18.744	4.37436	0.760696	2.01122e-05	9.59734e-05
ENSDARG00000025034	63.4333	3.01536	0.501947	2.06893e-05	9.86015e-05
ENSDARG00000089204	26.3921	5.17898	0.945361	2.13858e-05	0.000101791
ENSDARG00000007708	1156.65	-1.31169	0.21294	2.16042e-05	0.000102699
ENSDARG00000031387	112.561	-3.54243	0.598749	2.16881e-05	0.000102967
ENSDARG00000075188	101.625	-3.60647	0.610848	2.17973e-05	0.000103354
ENSDARG00000037593	75.8294	-3.42502	0.577055	2.1863e-05	0.000103534
ENSDARG00000022165	31.9086	4.43078	0.774967	2.2319e-05	0.000105426
ENSDARG00000094695	16.492	4.32958	0.753769	2.23068e-05	0.000105426
ENSDARG00000012688	456.292	2.40143	0.395767	2.25891e-05	0.000106567
ENSDARG00000020811	64.3987	-3.53795	0.598867	2.29535e-05	0.000108012
ENSDARG00000062794	38.7891	4.0339	0.694381	2.29424e-05	0.000108012
ENSDARG00000077654	73.2562	-3.11363	0.521309	2.34575e-05	0.000110245
ENSDARG00000061207	38.4407	3.68546	0.627602	2.41337e-05	0.000113281
ENSDARG00000077304	77.2493	-3.36435	0.567687	2.45204e-05	0.000114951
ENSDARG00000042344	52.6923	3.31122	0.558184	2.4956e-05	0.000116847
ENSDARG00000099430	62.6192	3.3328	0.562475	2.5476e-05	0.000119132
ENSDARG00000032102	43.4847	3.74564	0.640428	2.59219e-05	0.000121065
ENSDARG00000014875	199.33	3.30379	0.557599	2.62385e-05	0.00012239
ENSDARG00000015266	602.363	-1.84432	0.302641	2.62731e-05	0.000122399
ENSDARG00000102883	410.805	-1.6631	0.272374	2.65036e-05	0.000123319
ENSDARG00000076283	22.2742	4.4604	0.785664	2.67708e-05	0.000124407
ENSDARG00000017624	810.354	3.52121	0.598408	2.68858e-05	0.000124786
ENSDARG00000027187	162.904	-2.27522	0.375927	2.69306e-05	0.000124838
ENSDARG00000078781	101.964	2.85678	0.477686	2.78178e-05	0.000128791
ENSDARG00000098852	15.1089	4.71281	0.842281	2.795e-05	0.000129243
ENSDARG00000088293	145.741	-2.53987	0.422436	2.89779e-05	0.00013383
ENSDARG00000030441	25.8565	4.0497	0.702549	2.92172e-05	0.000134768
ENSDARG00000045850	22.766	3.89512	0.672873	3.08363e-05	0.000142061
ENSDARG00000010052	63.3498	2.63041	0.439094	3.10834e-05	0.000143023
ENSDARG00000009499	581.993	-1.69456	0.278821	3.12078e-05	0.000143419
ENSDARG00000019239	45.0465	2.94668	0.495391	3.14567e-05	0.000144373
ENSDARG00000092807	8841.72	3.17392	0.53658	3.14928e-05	0.000144373
ENSDARG00000101624	120.627	-2.47377	0.411887	3.15539e-05	0.000144475
ENSDARG00000030106	86.9427	2.0007	0.330765	3.21919e-05	0.000147216
ENSDARG00000018602	118.319	2.07773	0.343937	3.23854e-05	0.00014792
ENSDARG00000010531	10.7906	4.38013	0.773307	3.25737e-05	0.000148598
ENSDARG00000056099	14.9824	4.62931	0.828755	3.39239e-05	0.000154568
ENSDARG00000053502	42.6388	4.31292	0.76022	3.41841e-05	0.000155564
ENSDARG00000082850	133.738	3.19395	0.541575	3.4363e-05	0.000156188
ENSDARG00000019060	30.6931	3.217	0.545851	3.44431e-05	0.000156361
ENSDARG00000087425	280.139	-3.50388	0.599497	3.46682e-05	0.000157192
ENSDARG00000056165	92.1599	-3.70093	0.637259	3.47779e-05	0.000157498
ENSDARG00000032565	109.926	-2.64111	0.442346	3.48241e-05	0.000157516
ENSDARG00000039269	449.8	-2.03111	0.336679	3.49593e-05	0.000157936
ENSDARG00000101794	83.3818	2.97555	0.50215	3.52048e-05	0.000158853
ENSDARG00000104837	66.1145	2.73796	0.459854	3.58713e-05	0.000161665
ENSDARG00000023394	28.3732	4.09401	0.715947	3.59268e-05	0.00016172
ENSDARG00000008377	57.7155	3.18845	0.541297	3.60541e-05	0.000162097
ENSDARG00000074848	28.9681	3.48118	0.595906	3.61155e-05	0.000162178
ENSDARG00000005612	31.0218	3.50388	0.600564	3.68723e-05	0.000165377
ENSDARG00000003564	11.1082	5.09562	0.942552	3.69321e-05	0.000165447
ENSDARG00000071076	159.09	-3.00608	0.508369	3.69811e-05	0.000165467
ENSDARG00000020448	31.477	3.62215	0.623237	3.70578e-05	0.000165612
ENSDARG00000023659	133.223	-2.73955	0.460698	3.74969e-05	0.000167374
ENSDARG00000076376	87.8206	-4.55236	0.814433	3.77251e-05	0.000168191
ENSDARG00000093768	78.0333	3.95351	0.688851	3.82293e-05	0.000170236
ENSDARG00000043856	129.327	3.1184	0.529364	3.83288e-05	0.000170475
ENSDARG00000075513	111.058	-2.63303	0.442126	3.84556e-05	0.000170836
ENSDARG00000092895	16.3464	4.55776	0.816796	3.94195e-05	0.000174909
ENSDARG00000104996	12.5685	4.27843	0.756773	4.01886e-05	0.000178111
ENSDARG00000043128	32.7832	4.20687	0.741778	4.02414e-05	0.000178133
ENSDARG00000089138	133.195	-2.65749	0.447402	4.15293e-05	0.000183616
ENSDARG00000099499	103.362	3.39366	0.581882	4.18319e-05	0.000184735
ENSDARG00000053858	27.4207	4.26268	0.754512	4.20381e-05	0.000185426
ENSDARG00000035433	64.852	2.47939	0.416534	4.36116e-05	0.00019214
ENSDARG00000025718	259.018	-2.30944	0.386998	4.44096e-05	0.000195276
ENSDARG00000100908	208.436	-2.46734	0.414627	4.44282e-05	0.000195276
ENSDARG00000007413	41.5228	3.70517	0.642815	4.46858e-05	0.000196178
ENSDARG00000004296	42.9156	3.2036	0.547454	4.47797e-05	0.000196359
ENSDARG00000031317	472.555	2.76702	0.468009	4.51672e-05	0.000197825
ENSDARG00000062326	182.527	3.12704	0.533994	4.68737e-05	0.000205059
ENSDARG00000078416	96.459	-2.27052	0.380956	4.76246e-05	0.0002081
ENSDARG00000091079	203.911	-2.36561	0.397581	4.77122e-05	0.000208239
ENSDARG00000075021	27.9463	3.05871	0.521878	4.83455e-05	0.000210756
ENSDARG00000003068	22.3578	3.97947	0.699409	4.91817e-05	0.000214148
ENSDARG00000099532	43.0394	2.83994	0.482284	4.92382e-05	0.000214148
ENSDARG00000043857	28.9855	2.94722	0.501942	4.99067e-05	0.000216803
ENSDARG00000099002	73.1239	-3.24637	0.557305	5.04142e-05	0.000218753
ENSDARG00000094097	99.039	2.4213	0.408108	5.10361e-05	0.000221194
ENSDARG00000045145	70.917	-3.1944	0.548134	5.21157e-05	0.000225611
ENSDARG00000099312	76.6567	2.70531	0.458864	5.23531e-05	0.000226376
ENSDARG00000101840	334.488	-2.38478	0.402001	5.25009e-05	0.000226752
ENSDARG00000062463	27.4348	4.26133	0.759696	5.28344e-05	0.000227929
ENSDARG00000070472	43.3753	3.2345	0.555864	5.29127e-05	0.000228003
ENSDARG00000063922	71.659	3.04792	0.521282	5.30641e-05	0.000228129
ENSDARG00000078953	175.454	-2.57699	0.436109	5.30413e-05	0.000228129
ENSDARG00000029370	90.4205	-2.99308	0.512251	5.69786e-05	0.000244676
ENSDARG00000021113	814.295	2.08055	0.349796	5.72943e-05	0.000245489
ENSDARG00000105472	135.369	3.5654	0.620271	5.72997e-05	0.000245489
ENSDARG00000070787	27.1874	3.13142	0.537966	5.75458e-05	0.000246261
ENSDARG00000004870	63.6827	3.59988	0.627102	5.76891e-05	0.000246592
ENSDARG00000011175	99.7267	2.59154	0.439927	5.8593e-05	0.000250168
ENSDARG00000005397	88.0148	2.57033	0.436194	5.88493e-05	0.000250976
ENSDARG00000039667	36.8452	3.60115	0.627756	5.89511e-05	0.000251123
ENSDARG00000103403	44.5672	3.28311	0.566888	5.93886e-05	0.000252698
ENSDARG00000013430	236.476	2.51451	0.426406	5.96019e-05	0.000253317
ENSDARG00000100823	51.3002	2.84674	0.486176	5.97509e-05	0.000253661
ENSDARG00000061735	600.09	-1.93976	0.325845	5.98586e-05	0.00025383
ENSDARG00000031435	67.3511	3.90908	0.689383	6.00815e-05	0.000254486
ENSDARG00000104018	65.5398	2.87053	0.490731	6.07097e-05	0.000256855
ENSDARG00000051761	112.116	-2.67701	0.455954	6.19502e-05	0.000261806
ENSDARG00000003216	35.4345	3.92286	0.692954	6.22838e-05	0.000262919
ENSDARG00000063719	193.504	2.00239	0.337143	6.29932e-05	0.000265613
ENSDARG00000038787	18.9549	5.19125	0.988432	6.48615e-05	0.000272992
ENSDARG00000105321	15.7363	4.50486	0.818381	6.48897e-05	0.000272992
ENSDARG00000063713	73.169	-3.30397	0.572609	6.60268e-05	0.000277464
ENSDARG00000068128	174.716	-3.0851	0.531702	6.69669e-05	0.000281097
ENSDARG00000059596	230.48	-2.32335	0.393936	6.72823e-05	0.000282104
ENSDARG00000058984	26.5059	3.58769	0.627735	6.76955e-05	0.000283518
ENSDARG00000103158	137.002	-2.23556	0.378746	6.90075e-05	0.000288689
ENSDARG00000013307	2029.17	1.8423	0.310405	7.00784e-05	0.00029284
ENSDARG00000002167	67.9715	-3.47335	0.606215	7.04582e-05	0.000294098
ENSDARG00000038693	15.142	4.66289	0.857266	7.07746e-05	0.000295089
ENSDARG00000014591	19.4903	4.33992	0.784021	7.08805e-05	0.000295201
ENSDARG00000029479	8.86688	4.94694	0.927378	7.21136e-05	0.000299667
ENSDARG00000032765	148.291	2.33992	0.397633	7.20906e-05	0.000299667
ENSDARG00000027353	83.0802	-3.12203	0.539789	7.22729e-05	0.000299995
ENSDARG00000001777	81.0246	-3.28551	0.570746	7.27732e-05	0.000301736
ENSDARG00000104497	69.4124	-2.95282	0.508737	7.42633e-05	0.000307573
ENSDARG00000037790	69.5873	3.67813	0.647446	7.45678e-05	0.000308492
ENSDARG00000018840	24.0421	4.16221	0.74712	7.53338e-05	0.000310627
ENSDARG00000040822	15.3899	4.30618	0.778148	7.51968e-05	0.000310627
ENSDARG00000061048	137.666	2.64794	0.453244	7.53304e-05	0.000310627
ENSDARG00000060350	59.2069	5.31608	1.03081	7.60832e-05	0.000313371
ENSDARG00000021582	14.0805	4.47408	0.81635	7.76609e-05	0.000319517
ENSDARG00000043722	20.5704	4.61041	0.848519	7.98678e-05	0.000328124
ENSDARG00000053047	873.28	2.53697	0.433998	7.99288e-05	0.000328124
ENSDARG00000056186	61.1004	3.63666	0.641146	8.22525e-05	0.000337292
ENSDARG00000069111	104.674	-2.73961	0.4711	8.25291e-05	0.000338055
ENSDARG00000029230	45.6667	4.58618	0.844041	8.31624e-05	0.000340275
ENSDARG00000102558	95.4495	3.74346	0.662785	8.34804e-05	0.000341203
ENSDARG00000026024	64.9367	-3.56035	0.626455	8.39184e-05	0.000342618
ENSDARG00000004889	141.996	-3.34073	0.58394	8.48201e-05	0.00034592
ENSDARG00000090634	73.554	3.26159	0.568807	8.49244e-05	0.000345968
ENSDARG00000014763	23.4694	3.52834	0.62053	8.55498e-05	0.000348135
ENSDARG00000045542	16.1746	4.54349	0.835068	8.59067e-05	0.000349207
ENSDARG00000045768	108.097	2.33077	0.398281	8.81829e-05	0.00035768
ENSDARG00000077256	295.357	1.76181	0.298431	8.81759e-05	0.00035768
ENSDARG00000006760	148.237	-2.06008	0.350478	8.85772e-05	0.00035889
ENSDARG00000071670	83.5277	3.30047	0.577023	8.88778e-05	0.000359717
ENSDARG00000041974	26.8094	4.47282	0.820308	9.04996e-05	0.000365884
ENSDARG00000008502	307.67	1.94233	0.330112	9.09786e-05	0.000367422
ENSDARG00000091348	254.289	2.7879	0.481549	9.27063e-05	0.000373995
ENSDARG00000090352	37.2441	3.70183	0.656692	9.33191e-05	0.000376061
ENSDARG00000090564	55.6363	-3.13981	0.547449	9.4529e-05	0.000380526
ENSDARG00000035598	15.996	3.56161	0.62904	9.477e-05	0.000380712
ENSDARG00000058354	24.3219	4.16325	0.752929	9.47794e-05	0.000380712
ENSDARG00000105288	55.7585	2.72487	0.470317	9.49238e-05	0.000380882
ENSDARG00000055115	37.2015	3.50521	0.618041	9.53639e-05	0.000382237
ENSDARG00000077037	120.247	-2.46047	0.422456	9.57243e-05	0.00038327
ENSDARG00000098118	49.3497	2.81118	0.486352	9.61793e-05	0.000384679
ENSDARG00000060395	95.9638	-3.54097	0.625511	9.75082e-05	0.000389577
ENSDARG00000098810	84.7391	3.06154	0.533271	9.81063e-05	0.000391547
ENSDARG00000054007	124.973	-2.64951	0.457162	9.93425e-05	0.000396057
ENSDARG00000087456	140.265	4.0074	0.721147	0.000100535	0.000400384
ENSDARG00000059400	12.9931	4.40813	0.808936	0.000102081	0.000406108
ENSDARG00000098853	55.715	2.3143	0.397074	0.000102691	0.000408099
ENSDARG00000069827	1033.02	3.99907	0.72015	0.000103865	0.000412325
ENSDARG00000044565	89.3058	3.05104	0.532239	0.00010413	0.000412499
ENSDARG00000105018	31.0648	4.13768	0.749716	0.00010405	0.000412499
ENSDARG00000027159	63.5468	-3.58523	0.63562	0.00010443	0.000413249
ENSDARG00000019326	29.8324	3.67768	0.654197	0.000104776	0.000414181
ENSDARG00000091111	9.82501	5.25892	1.02907	0.000108474	0.000428343
ENSDARG00000057075	12.7117	4.47143	0.825224	0.000108945	0.000429295
ENSDARG00000105037	113.86	3.17388	0.556258	0.000108862	0.000429295
ENSDARG00000021984	59.2274	4.69187	0.877577	0.000109568	0.000431293
ENSDARG00000101831	179.645	-2.55703	0.441845	0.000111628	0.000438938
ENSDARG00000098816	59.4159	-4.70262	0.880837	0.000111798	0.000439145
ENSDARG00000029146	276.5	-1.60355	0.272983	0.000112903	0.000443021
ENSDARG00000002193	639.206	3.05092	0.533765	0.000114763	0.000449847
ENSDARG00000003035	465.256	-2.15621	0.370176	0.000115399	0.000451865
ENSDARG00000086425	158.885	-2.29315	0.394766	0.000116894	0.000457238
ENSDARG00000057491	178.145	-2.65312	0.460022	0.000117062	0.000457416
ENSDARG00000101584	19.5678	3.90467	0.703391	0.000118565	0.000462805
ENSDARG00000045568	16.3966	4.03098	0.730348	0.000120182	0.000468626
ENSDARG00000069185	243.426	-2.77344	0.482706	0.000121445	0.000473056
ENSDARG00000019033	56.8904	3.12477	0.548796	0.000122077	0.000475021
ENSDARG00000007836	98.0751	3.49509	0.620961	0.000123373	0.000479065
ENSDARG00000099663	49.5242	4.16523	0.759935	0.000123341	0.000479065
ENSDARG00000005479	228.13	-1.46655	0.250051	0.000126037	0.0004889
ENSDARG00000063672	62.0356	-3.42792	0.608146	0.000126377	0.000489711
ENSDARG00000041607	44.8076	3.89844	0.703588	0.000126663	0.000490062
ENSDARG00000087303	195.765	2.49662	0.432477	0.00012673	0.000490062
ENSDARG00000104181	58.6649	4.22226	0.773209	0.00012701	0.000490635
ENSDARG00000038030	31.777	4.16869	0.761541	0.00012755	0.000491196
ENSDARG00000092493	81.5495	3.39402	0.601623	0.000127338	0.000491196
ENSDARG00000105116	286.175	2.24802	0.387659	0.000127483	0.000491196
ENSDARG00000013935	53.667	-4.23295	0.775732	0.000127791	0.000491619
ENSDARG00000061149	8.9403	4.92856	0.942817	0.000127959	0.000491755
ENSDARG00000089836	54.8852	3.07987	0.541164	0.00012912	0.000495709
ENSDARG00000004451	54.9211	-3.54593	0.632022	0.000129464	0.000496518
ENSDARG00000104066	128.104	2.607	0.453099	0.000131245	0.000502832
ENSDARG00000053829	14.2375	4.55704	0.85082	0.000131638	0.000503821
ENSDARG00000063895	644.365	2.80329	0.489629	0.000133622	0.000510843
ENSDARG00000105179	62.9843	-3.55983	0.635451	0.000133747	0.000510843
ENSDARG00000014828	15.4541	4.31431	0.795211	0.000134182	0.000511712
ENSDARG00000041182	1092.19	1.86084	0.319408	0.000134249	0.000511712
ENSDARG00000004714	130.105	3.16195	0.55768	0.000135607	0.000516363
ENSDARG00000042620	36.3294	3.5374	0.631332	0.000136263	0.000518332
ENSDARG00000037647	27.2995	3.78126	0.680981	0.000136985	0.000520547
ENSDARG00000039400	80.6825	-2.60321	0.453196	0.000139259	0.000528648
ENSDARG00000035890	26.8133	4.2715	0.786923	0.00014099	0.000534253
ENSDARG00000103959	48.2901	2.44392	0.424231	0.000141021	0.000534253
ENSDARG00000074481	65.8523	-3.27789	0.580865	0.000141653	0.000536104
ENSDARG00000009844	14.9063	5.16789	1.01396	0.00014313	0.000541144
ENSDARG00000073742	173.644	4.62276	0.870035	0.000146959	0.000555059
ENSDARG00000022456	228.489	3.49175	0.623768	0.000147491	0.000556502
ENSDARG00000053840	41.9812	4.34171	0.80427	0.000148798	0.000560869
ENSDARG00000057936	11.4602	4.65098	0.877624	0.000150183	0.000564946
ENSDARG00000062983	73.6977	-2.88062	0.505839	0.000150092	0.000564946
ENSDARG00000039684	12.4141	4.53026	0.848883	0.000152372	0.000572604
ENSDARG00000079313	300.089	-1.70372	0.293038	0.000155183	0.000582582
ENSDARG00000039515	108.946	2.50092	0.436101	0.000158207	0.000593336
ENSDARG00000004034	46.747	3.59551	0.646678	0.000163146	0.000611246
ENSDARG00000098608	14.0657	4.14764	0.763588	0.00016541	0.000619108
ENSDARG00000019339	10.1353	4.625	0.874656	0.000166996	0.000624051
ENSDARG00000034291	1659.61	2.72346	0.477987	0.000167066	0.000624051
ENSDARG00000011208	24.385	3.78219	0.685737	0.000168428	0.00062851
ENSDARG00000045465	85.8241	2.16862	0.376637	0.000170564	0.000635845
ENSDARG00000034667	126.016	-2.46852	0.431514	0.000175739	0.000654483
ENSDARG00000036995	33.1476	4.46394	0.837548	0.000176331	0.000656032
ENSDARG00000060532	127.836	-2.64711	0.464605	0.000177172	0.000658506
ENSDARG00000061517	76.9535	-3.0005	0.531298	0.00017837	0.0006623
ENSDARG00000094836	156.403	2.12529	0.36942	0.000179924	0.000667405
ENSDARG00000005191	283.554	3.3675	0.603068	0.0001817	0.000672656
ENSDARG00000054063	25.7375	4.46873	0.839569	0.000181607	0.000672656
ENSDARG00000076667	60.5221	3.5112	0.632009	0.000183461	0.000678503
ENSDARG00000013390	60.1614	-3.28187	0.586364	0.000183779	0.000679003
ENSDARG00000077777	3515.47	2.93106	0.518768	0.000186532	0.000688493
ENSDARG00000007901	43.0919	2.72717	0.480635	0.000191202	0.000704338
ENSDARG00000094210	35.4328	3.94127	0.722295	0.000191106	0.000704338
ENSDARG00000020197	236.259	2.41972	0.423664	0.000191657	0.000705319
ENSDARG00000041811	715.254	2.29631	0.401246	0.000193931	0.000712983
ENSDARG00000044521	527.664	2.27333	0.397136	0.000195163	0.000716605
ENSDARG00000102746	10.2136	4.31593	0.806005	0.0001953	0.000716605
ENSDARG00000098612	103.856	-2.89685	0.51342	0.00020077	0.000735953
ENSDARG00000098240	312.722	-2.32422	0.40687	0.000202695	0.00074228
ENSDARG00000097753	41.3521	3.32337	0.596875	0.000208043	0.000761116
ENSDARG00000007405	27.0319	3.34509	0.601237	0.000208521	0.000762119
ENSDARG00000016200	66.8638	4.37416	0.821483	0.000209087	0.00076344
ENSDARG00000008678	32.9463	3.61664	0.656573	0.000212832	0.000776354
ENSDARG00000036316	1626.64	3.15416	0.564091	0.000214132	0.000780333
ENSDARG00000101722	110.628	-2.60438	0.459344	0.000214913	0.000782415
ENSDARG00000059368	64.9971	-2.8663	0.508758	0.000216031	0.000785719
ENSDARG00000016263	69.186	2.7111	0.479603	0.000219021	0.000795818
ENSDARG00000020621	49.5813	3.28422	0.590214	0.00022062	0.000800849
ENSDARG00000070607	24.1752	4.18026	0.778546	0.000221088	0.000801769
ENSDARG00000098361	63.3693	3.39341	0.612119	0.000222217	0.000805081
ENSDARG00000035329	90.3185	3.20119	0.574001	0.000222643	0.000805839
ENSDARG00000004906	45.2403	3.0486	0.544363	0.000224264	0.00081092
ENSDARG00000043457	566.587	2.96693	0.528634	0.000224652	0.000811537
ENSDARG00000025326	20.0322	4.1825	0.779755	0.000226879	0.000818789
ENSDARG00000018782	138.62	-2.22407	0.389974	0.000227725	0.000821048
ENSDARG00000044251	59.9728	2.55503	0.450997	0.000228545	0.000823211
ENSDARG00000015222	11.0756	4.54922	0.86651	0.000231178	0.00083189
ENSDARG00000003308	78.0044	2.76938	0.491474	0.000232274	0.00083503
ENSDARG00000062972	303.02	-1.98193	0.346393	0.000234239	0.000841282
ENSDARG00000017929	183.286	-1.62503	0.282677	0.000236605	0.000848962
ENSDARG00000062244	259.122	-1.46197	0.253878	0.000238328	0.000854324
ENSDARG00000060835	102.408	-2.18505	0.38354	0.000241477	0.000864783
ENSDARG00000045929	49.3822	3.54817	0.645442	0.000244436	0.00087454
ENSDARG00000015385	19.735	4.72292	0.912451	0.000246228	0.000880107
ENSDARG00000026229	69.0781	-3.83744	0.706169	0.00024669	0.000880916
ENSDARG00000007795	162.955	2.22312	0.390853	0.000249088	0.000888627
ENSDARG00000042221	87.9469	-2.82354	0.502879	0.000249768	0.000889354
ENSDARG00000103271	56.2228	2.75591	0.490012	0.000249636	0.000889354
ENSDARG00000012244	49.126	3.61218	0.659649	0.00025626	0.000911267
ENSDARG00000045808	78.7523	4.3357	0.818472	0.000256411	0.000911267
ENSDARG00000068265	47.5037	3.33802	0.604467	0.000265344	0.000942119
ENSDARG00000045355	10.5198	4.91444	0.966973	0.000266845	0.000946546
ENSDARG00000089271	293.11	2.39537	0.423498	0.000268832	0.000952689
ENSDARG00000058159	23.4464	3.70292	0.679844	0.000271129	0.000959919
ENSDARG00000098957	58.0662	5.244	1.06809	0.000275121	0.000973128
ENSDARG00000094833	12.4188	4.46716	0.852243	0.00027715	0.000979376
ENSDARG00000101028	92.9856	-2.22257	0.392339	0.000284815	0.00100551
ENSDARG00000010641	120.507	2.7961	0.499895	0.000288632	0.00101706
ENSDARG00000035325	23.5972	3.42575	0.623868	0.000288595	0.00101706
ENSDARG00000077582	166.306	-1.88879	0.331749	0.00028991	0.0010206
ENSDARG00000018192	605.828	1.94139	0.341342	0.000292173	0.0010276
ENSDARG00000074378	195.764	-2.46507	0.437863	0.000298885	0.00105012
ENSDARG00000076833	43.9064	2.86435	0.513558	0.000299141	0.00105012
ENSDARG00000074533	28.4063	3.18568	0.576995	0.00030994	0.00108701
ENSDARG00000099104	2720.27	1.83814	0.32342	0.000315108	0.0011041
ENSDARG00000008292	99.4792	2.28833	0.405733	0.000316191	0.00110685
ENSDARG00000098451	26.6758	3.67314	0.67709	0.00031661	0.00110728
ENSDARG00000020976	12.3833	4.66288	0.906106	0.000319395	0.00111598
ENSDARG00000053684	398.808	2.07578	0.366861	0.000322509	0.0011258
ENSDARG00000020840	23.9774	4.33401	0.825024	0.000323591	0.00112852
ENSDARG00000098059	75.694	2.96713	0.53496	0.000327325	0.00114048
ENSDARG00000008706	138.843	2.13645	0.378169	0.000327862	0.00114129
ENSDARG00000011219	70.2285	-3.45827	0.633283	0.00033005	0.00114783
ENSDARG00000061108	665.694	-1.41033	0.247209	0.000333094	0.00115734
ENSDARG00000020043	39.4317	3.80639	0.707175	0.000339849	0.00117971
ENSDARG00000070271	135.33	-2.26841	0.403182	0.000346571	0.00120193
ENSDARG00000018600	11.0585	4.54814	0.880612	0.000357048	0.00123711
ENSDARG00000078947	79.6647	-2.2333	0.39711	0.000358982	0.00124266
ENSDARG00000061017	53.6074	-3.35255	0.613436	0.00035977	0.00124423
ENSDARG00000091777	42.5487	3.4029	0.623832	0.000361813	0.00125014
ENSDARG00000062695	8.0073	4.9653	0.994714	0.000366507	0.00126519
ENSDARG00000016830	58.1173	3.09946	0.563056	0.000368426	0.00127064
ENSDARG00000058861	14.5863	4.24076	0.80693	0.000369087	0.00127138
ENSDARG00000098350	32.2619	3.86328	0.721578	0.000369323	0.00127138
ENSDARG00000059357	49.7257	2.69313	0.484768	0.000388248	0.0013353
ENSDARG00000079483	205.392	-2.02509	0.359649	0.000388881	0.00133624
ENSDARG00000054442	53.8614	3.19669	0.583631	0.000392432	0.0013472
ENSDARG00000104071	56.2343	2.57981	0.463531	0.000398775	0.00136772
ENSDARG00000069790	98.1079	3.28742	0.602446	0.000402585	0.00137952
ENSDARG00000045565	12.5699	4.0153	0.757804	0.000406355	0.00139004
ENSDARG00000097452	10.5998	4.57024	0.890691	0.0004064	0.00139004
ENSDARG00000088354	57.2738	-3.41489	0.628919	0.000410441	0.00140258
ENSDARG00000027813	91.9902	2.48609	0.446185	0.000410937	0.00140299
ENSDARG00000025972	39.4467	3.55099	0.657434	0.000414337	0.00141201
ENSDARG00000058158	6.79996	4.8274	0.960227	0.000414018	0.00141201
ENSDARG00000101334	6.65814	4.85362	0.967886	0.000416716	0.00141882
ENSDARG00000003205	7.0884	4.89812	0.980733	0.000417872	0.00142146
ENSDARG00000028857	59.1955	-3.10243	0.566093	0.000421043	0.00143094
ENSDARG00000098753	36.9535	3.0397	0.553693	0.000422687	0.00143522
ENSDARG00000040237	277.93	-1.56306	0.276531	0.000427066	0.00144877
ENSDARG00000101561	227.205	-2.30279	0.412311	0.000429989	0.00145737
ENSDARG00000099368	215.493	3.0662	0.559367	0.000432422	0.00146428
ENSDARG00000020693	292.803	2.59215	0.467127	0.000433984	0.00146824
ENSDARG00000018757	11.1602	4.70259	0.930075	0.000460634	0.00155699
ENSDARG00000009868	73.8003	2.53188	0.456517	0.000461092	0.00155713
ENSDARG00000104049	244.999	2.87493	0.522986	0.000467557	0.00157753
ENSDARG00000078593	71.8947	-2.98973	0.545615	0.000468014	0.00157765
ENSDARG00000006963	34.7101	3.58169	0.666908	0.000473349	0.00159419
ENSDARG00000100007	61.8362	-4.68981	0.927892	0.000476218	0.00160241
ENSDARG00000075892	132.509	-2.01312	0.359827	0.000481892	0.00162004
ENSDARG00000078075	17.6064	4.1016	0.782503	0.000486373	0.00163363
ENSDARG00000062801	261.104	-1.92976	0.34459	0.000487943	0.00163743
ENSDARG00000082131	17.4978	4.80644	0.961114	0.000489357	0.0016407
ENSDARG00000102417	52.2821	2.62776	0.476109	0.000501019	0.00167829
ENSDARG00000026941	16.9678	4.03633	0.768513	0.000504553	0.00168861
ENSDARG00000002601	61.0779	-4.23682	0.815435	0.000505721	0.00169101
ENSDARG00000040674	9.57748	4.43016	0.862717	0.000506443	0.0016919
ENSDARG00000105098	13.0411	4.10618	0.785724	0.000524332	0.0017501
ENSDARG00000035985	15.1947	4.01019	0.764178	0.000535322	0.00178369
ENSDARG00000038074	21.7844	3.41503	0.634593	0.00053535	0.00178369
ENSDARG00000103505	23.1344	3.76587	0.710094	0.00054754	0.00182267
ENSDARG00000074849	11.8934	4.40186	0.858488	0.000551565	0.00183443
ENSDARG00000074468	15.7022	4.07337	0.77982	0.000556578	0.00184946
ENSDARG00000041300	31.9748	-5.11693	1.06303	0.000569098	0.00188938
ENSDARG00000104809	61.8144	-3.6833	0.693213	0.000573329	0.00190174
ENSDARG00000026759	63.5094	-3.18185	0.589269	0.000612294	0.00202918
ENSDARG00000054916	16.1436	4.39725	0.861636	0.000627044	0.00207622
ENSDARG00000056307	19.7105	4.39772	0.862419	0.000639495	0.00211557
ENSDARG00000098735	14.5097	4.79884	0.970431	0.000645142	0.00213236
ENSDARG00000052680	11.8821	4.24579	0.825651	0.00065562	0.00216507
ENSDARG00000029170	43.072	3.50447	0.658606	0.000675119	0.00222749
ENSDARG00000061829	92.4073	-2.51006	0.458019	0.000679649	0.00223848
ENSDARG00000102977	35.4421	-3.97311	0.762312	0.000679198	0.00223848
ENSDARG00000035043	10.7232	4.58601	0.91375	0.000684904	0.00225181
ENSDARG00000092170	227.643	3.08904	0.572555	0.000684542	0.00225181
ENSDARG00000092722	62.334	-3.23359	0.602166	0.00068572	0.00225251
ENSDARG00000087452	88.0719	2.55474	0.466834	0.000687844	0.0022575
ENSDARG00000038429	96.3688	-2.12349	0.384586	0.000688591	0.00225797
ENSDARG00000037285	25.0236	4.31762	0.84494	0.00069021	0.00226129
ENSDARG00000090716	165.678	3.19781	0.595024	0.00069334	0.00226955
ENSDARG00000100703	22.5063	4.39343	0.864409	0.000699921	0.00228909
ENSDARG00000008575	115.46	-2.54782	0.465827	0.000703112	0.00229751
ENSDARG00000044551	111.185	-2.27413	0.413353	0.000704004	0.00229841
ENSDARG00000105276	25.3087	4.58981	0.916376	0.000714621	0.00233103
ENSDARG00000036092	17.0168	3.64506	0.690309	0.000716022	0.00233356
ENSDARG00000054530	60.3234	2.90506	0.536365	0.000716676	0.00233366
ENSDARG00000052606	73.1723	-2.78084	0.51182	0.000721983	0.00234889
ENSDARG00000042010	301.858	2.80504	0.516668	0.000724547	0.00235518
ENSDARG00000067990	410.469	2.08517	0.37808	0.00072952	0.00236928
ENSDARG00000018411	51.009	2.83049	0.521871	0.00073121	0.0023727
ENSDARG00000038954	91.8415	-3.53506	0.667254	0.000739193	0.00239652
ENSDARG00000035987	16.0376	4.0627	0.78571	0.000742814	0.00240617
ENSDARG00000042793	74.189	-3.22995	0.603285	0.000751125	0.00243098
ENSDARG00000007480	109.156	2.92017	0.540336	0.000755525	0.0024431
ENSDARG00000104353	169.237	2.22137	0.404404	0.000763904	0.00246806
ENSDARG00000026664	82.8684	2.31225	0.421948	0.000777032	0.00250767
ENSDARG00000051754	48.7526	-3.24204	0.606506	0.000777509	0.00250767
ENSDARG00000077717	3307.89	3.08281	0.573793	0.00077916	0.00251083
ENSDARG00000018328	14.8777	4.24575	0.831182	0.000779951	0.00251121
ENSDARG00000103712	8.62372	4.29566	0.843589	0.000781721	0.00251473
ENSDARG00000062361	303.208	-1.67855	0.303195	0.000793685	0.00255102
ENSDARG00000013963	73.3463	2.95949	0.549164	0.000794745	0.00255223
ENSDARG00000007180	43.5379	3.25594	0.609969	0.000799096	0.0025618
ENSDARG00000036588	12.2102	3.85854	0.74062	0.000799028	0.0025618
ENSDARG00000054849	40.6926	3.02668	0.56295	0.000802946	0.00257193
ENSDARG00000037008	49.0317	-3.94219	0.759994	0.00080575	0.0025787
ENSDARG00000045025	7.75066	4.49839	0.897289	0.000822879	0.00263126
ENSDARG00000060257	69.7117	-2.88321	0.53455	0.000826742	0.00264135
ENSDARG00000103322	30.3708	3.65532	0.696129	0.000827453	0.00264136
ENSDARG00000052371	10.9431	4.91245	1.01711	0.000854139	0.00272421
ENSDARG00000052438	127.445	-2.11052	0.384871	0.000859151	0.00273786
ENSDARG00000020946	68.6746	2.27556	0.416603	0.000878782	0.00279564
ENSDARG00000056740	29.383	3.25498	0.611772	0.000878745	0.00279564
ENSDARG00000041051	82.0666	-2.42296	0.445082	0.000884997	0.00281301
ENSDARG00000007960	391.386	-1.56605	0.283699	0.000912525	0.00289805
ENSDARG00000059897	61.5774	-2.87178	0.534156	0.000918851	0.00291566
ENSDARG00000099970	18080.3	2.24576	0.411836	0.000942208	0.00298723
ENSDARG00000061042	58.5649	-3.15834	0.593196	0.000946036	0.00299682
ENSDARG00000070780	10.256	4.60491	0.931463	0.000947295	0.00299826
ENSDARG00000057218	25.6478	3.81533	0.735601	0.000953569	0.00301556
ENSDARG00000007912	47.9179	-4.35749	0.865982	0.000954643	0.0030164
ENSDARG00000074554	27.0832	3.45993	0.657259	0.000962325	0.0030381
ENSDARG00000042977	47.8855	2.81778	0.524275	0.000969619	0.00305855
ENSDARG00000010246	72.2707	2.70171	0.501217	0.00097487	0.00307251
ENSDARG00000092873	112.251	3.79014	0.730504	0.000975767	0.00307274
ENSDARG00000023950	9.98443	4.3571	0.867042	0.000986759	0.00310212
ENSDARG00000060766	46.0638	-3.62495	0.693829	0.000986165	0.00310212
ENSDARG00000105435	76.8037	-3.24655	0.612577	0.000991547	0.00311455
ENSDARG00000004470	34.7325	2.48968	0.459849	0.000998052	0.00312971
ENSDARG00000103203	23.7804	4.18415	0.823987	0.000997566	0.00312971
ENSDARG00000054355	107.54	4.02761	0.786265	0.00100009	0.00313348
ENSDARG00000068434	189.608	3.27545	0.618961	0.00100577	0.00314863
ENSDARG00000060065	487.249	-1.48288	0.269212	0.00100916	0.00315657
ENSDARG00000105811	59.6603	-3.15541	0.593986	0.00101262	0.00316477
ENSDARG00000014674	40.4987	2.63243	0.488254	0.00102063	0.00318714
ENSDARG00000098486	7.40975	4.78137	0.98553	0.00102588	0.00320085
ENSDARG00000036754	55.9564	3.51205	0.670109	0.0010282	0.00320538
ENSDARG00000076815	1695.21	-0.937945	0.169468	0.00103366	0.00321703
ENSDARG00000015422	14.8372	4.65813	0.949942	0.00104401	0.00324387
ENSDARG00000102372	85.4119	-3.01496	0.56561	0.00104402	0.00324387
ENSDARG00000104934	47.3499	-3.89409	0.756201	0.00106108	0.00329415
ENSDARG00000026406	18.9077	3.95777	0.771528	0.00106334	0.0032984
ENSDARG00000036335	17.805	4.17814	0.824575	0.00106911	0.00331355
ENSDARG00000057484	42.8361	3.32801	0.63143	0.00107138	0.00331783
ENSDARG00000073784	76.8193	-2.71467	0.505393	0.00107345	0.00332149
ENSDARG00000054539	26.1402	3.64896	0.701303	0.00107553	0.00332516
ENSDARG00000091609	45.0761	5.07226	1.08226	0.00108932	0.00336501
ENSDARG00000006923	185.626	2.2057	0.406124	0.00109234	0.00336877
ENSDARG00000046007	43.0829	-3.67738	0.708022	0.00109171	0.00336877
ENSDARG00000056829	13.4285	4.18497	0.827137	0.00109855	0.00338513
ENSDARG00000091655	9.79335	4.82931	1.00323	0.00111226	0.00342454
ENSDARG00000074572	31.2121	3.52335	0.674476	0.00111869	0.0034415
ENSDARG00000102333	86.4029	3.34469	0.636002	0.00113487	0.00348838
ENSDARG00000059707	85.0102	-2.46372	0.45705	0.00115948	0.00355819
ENSDARG00000089517	108.643	-2.24624	0.414457	0.00115864	0.00355819
ENSDARG00000076752	47.8084	-4.68488	0.962492	0.00118669	0.00363869
ENSDARG00000027547	16.1692	4.32278	0.864714	0.00119235	0.00365303
ENSDARG00000098237	54.4049	-3.97841	0.779859	0.00122521	0.00375064
ENSDARG00000057322	87.7916	3.57883	0.689087	0.00123037	0.00376336
ENSDARG00000098466	18.6466	3.50063	0.671962	0.00124543	0.00380629
ENSDARG00000045888	42.4355	3.15705	0.598872	0.00125995	0.00384438
ENSDARG00000100805	38.556	-4.20198	0.835707	0.00125922	0.00384438
ENSDARG00000074985	19.2967	4.19531	0.834425	0.00127616	0.00389065
ENSDARG00000079363	76.5542	-3.81006	0.742435	0.00128688	0.00392014
ENSDARG00000102887	30.854	4.14474	0.822545	0.00129539	0.00394284
ENSDARG00000097706	14.7201	4.00292	0.788217	0.00130683	0.00397441
ENSDARG00000010745	48.1882	2.55143	0.476234	0.00131689	0.00400176
ENSDARG00000037867	123.151	4.43022	0.896734	0.00131967	0.00400692
ENSDARG00000074143	142.449	-1.90553	0.351119	0.00132379	0.00401618
ENSDARG00000069142	144.783	2.31994	0.430921	0.00132895	0.00402857
ENSDARG00000040764	55.431	3.64521	0.705993	0.0013447	0.00407297
ENSDARG00000005026	136.657	-2.4033	0.44746	0.00135238	0.00409293
ENSDARG00000100354	26.6561	3.27759	0.625939	0.00135468	0.00409657
ENSDARG00000029057	13.5227	4.06892	0.805575	0.0013577	0.00410237
ENSDARG00000097057	25.7366	4.20991	0.840609	0.00138901	0.00419358
ENSDARG00000101199	171.79	2.81402	0.529991	0.00139696	0.00421418
ENSDARG00000017703	18.2092	3.86113	0.75688	0.00139845	0.00421528
ENSDARG00000055389	252.752	1.81534	0.334647	0.0014012	0.00422014
ENSDARG00000040135	60.3146	-3.34168	0.6405	0.00145729	0.00438552
ENSDARG00000038306	115.574	1.94304	0.359438	0.00145944	0.00438848
ENSDARG00000092624	64.0829	-2.58816	0.485353	0.00146743	0.00440895
ENSDARG00000056410	9.14092	4.54277	0.93184	0.00148542	0.00445941
ENSDARG00000070873	199.505	4.69723	0.977057	0.00150097	0.00450246
ENSDARG00000087341	39.8863	-4.64102	0.960915	0.00151254	0.00453351
ENSDARG00000001549	108.489	-2.21624	0.412609	0.00151417	0.00453478
ENSDARG00000023933	51.2294	-3.35184	0.6445	0.00151768	0.00454164
ENSDARG00000044719	178.418	3.58042	0.694906	0.00153279	0.00458318
ENSDARG00000015352	34.9253	2.38735	0.446305	0.00155052	0.00463249
ENSDARG00000010059	92.8306	-2.52606	0.47396	0.00156474	0.00467122
ENSDARG00000017617	7.45213	4.7482	0.994907	0.00157259	0.00468755
ENSDARG00000069527	19.45	3.74262	0.732715	0.00157272	0.00468755
ENSDARG00000077060	197.109	-1.49567	0.275515	0.00157435	0.00468867
ENSDARG00000093448	31.995	3.62352	0.705563	0.00158343	0.00471195
ENSDARG00000052150	123.554	2.61846	0.492791	0.00159114	0.00473112
ENSDARG00000079751	55.2947	2.48118	0.465449	0.00163095	0.00484561
ENSDARG00000024954	16.3828	3.59396	0.699823	0.00163566	0.00485574
ENSDARG00000036140	295.725	2.52129	0.473878	0.00164785	0.00488805
ENSDARG00000094561	22.7097	4.23603	0.853974	0.0016694	0.00494805
ENSDARG00000103736	12.6381	4.14751	0.831893	0.00169157	0.00500977
ENSDARG00000005162	158.729	2.86494	0.544103	0.00170374	0.0050418
ENSDARG00000037746	833.136	2.70105	0.510736	0.00170602	0.00504455
ENSDARG00000038239	41.0123	3.52217	0.684883	0.00171477	0.00506566
ENSDARG00000075709	42.0376	2.97834	0.567867	0.00171587	0.00506566
ENSDARG00000097746	34.9516	3.3408	0.645041	0.00172023	0.00507452
ENSDARG00000093058	18.6179	3.9175	0.776412	0.00173214	0.0051056
ENSDARG00000054201	259.038	-1.36056	0.251011	0.00173855	0.00512047
ENSDARG00000055966	36.5364	3.42508	0.663817	0.00174932	0.00514812
ENSDARG00000021339	55.5966	3.9431	0.783355	0.00176613	0.00518941
ENSDARG00000056235	77.748	2.86026	0.543782	0.00176506	0.00518941
ENSDARG00000032836	37.9793	3.59699	0.702929	0.00178794	0.00524524
ENSDARG00000041086	48.8229	-2.90697	0.553622	0.00178786	0.00524524
ENSDARG00000053301	18.0241	3.6914	0.72448	0.00179298	0.00525589
ENSDARG00000101246	34.6717	2.81219	0.534358	0.00179771	0.00526561
ENSDARG00000041381	241.517	-1.73487	0.322084	0.00181499	0.00531206
ENSDARG00000041243	30.3516	2.20033	0.412087	0.00182226	0.00532187
ENSDARG00000078902	108.592	-2.11608	0.395603	0.0018199	0.00532187
ENSDARG00000100151	65.4952	-3.09031	0.592646	0.00182262	0.00532187
ENSDARG00000041022	66.2083	3.67773	0.721867	0.00182998	0.00533917
ENSDARG00000017590	57.2486	-2.98912	0.571438	0.00187258	0.00545919
ENSDARG00000041223	13.9512	3.87673	0.769237	0.00187452	0.00546058
ENSDARG00000075805	39.7439	-4.23778	0.859017	0.00188072	0.00547438
ENSDARG00000100494	142.114	2.56576	0.485106	0.0018999	0.00552591
ENSDARG00000035676	31.2019	2.72336	0.517236	0.00192509	0.00559481
ENSDARG00000104782	204.387	2.20573	0.413938	0.00192827	0.00559967
ENSDARG00000101279	25.1999	-4.66744	0.980019	0.001934	0.00561196
ENSDARG00000035993	49.9991	3.64227	0.715359	0.00194235	0.0056318
ENSDARG00000063596	7.74341	4.39752	0.902886	0.00194421	0.00563282
ENSDARG00000068641	9.4849	4.73818	1.00219	0.00195633	0.00566354
ENSDARG00000054696	68.4689	2.57554	0.487746	0.00195928	0.00566768
ENSDARG00000005085	80.7246	2.97729	0.570628	0.00198582	0.00573113
ENSDARG00000089742	48.1762	-3.66989	0.722403	0.00198574	0.00573113
ENSDARG00000102566	61.6292	-3.94642	0.787411	0.00198373	0.00573113
ENSDARG00000105747	12.8678	4.31633	0.881821	0.00201392	0.00580774
ENSDARG00000104100	50.5243	-3.46648	0.67667	0.00201838	0.00581609
ENSDARG00000103198	8.76011	4.22233	0.857663	0.00202754	0.00583799
ENSDARG00000029100	20.2457	3.63286	0.714491	0.00203032	0.00584149
ENSDARG00000104068	20.7377	4.48145	0.927976	0.00205903	0.00591951
ENSDARG00000100965	194.769	1.4795	0.274929	0.00206819	0.00594129
ENSDARG00000013044	12.8805	4.81103	1.02895	0.00208121	0.00596637
ENSDARG00000013443	19.8125	4.82972	1.0348	0.00208072	0.00596637
ENSDARG00000035907	281.786	2.94862	0.565573	0.00208172	0.00596637
ENSDARG00000039490	9.01003	4.70991	0.996667	0.00208871	0.00598179
ENSDARG00000005823	110.408	-2.04802	0.384209	0.00211119	0.00604155
ENSDARG00000097635	299.126	2.14772	0.403849	0.00213725	0.00611144
ENSDARG00000042030	14.5502	3.4765	0.680431	0.00214864	0.0061393
ENSDARG00000016280	385.007	-1.42352	0.264714	0.0021566	0.00615732
ENSDARG00000095904	103.207	-2.48545	0.471227	0.00217409	0.00620251
ENSDARG00000006065	40.4832	2.72177	0.519376	0.00218374	0.00622528
ENSDARG00000035870	66.6377	2.35758	0.445829	0.00219033	0.00623932
ENSDARG00000014420	1375.12	3.03887	0.586037	0.00222984	0.00634217
ENSDARG00000057854	164.792	-1.88865	0.353865	0.00222911	0.00634217
ENSDARG00000007523	106.266	2.22231	0.419306	0.00225276	0.0064025
ENSDARG00000044573	30.405	3.1174	0.603015	0.0022582	0.00641306
ENSDARG00000002231	42.6643	-3.61064	0.71234	0.00226747	0.0064345
ENSDARG00000069920	283.334	2.80177	0.536667	0.00230901	0.00654739
ENSDARG00000100594	11.2493	4.36278	0.900201	0.00231601	0.00656224
ENSDARG00000027236	108.153	3.75929	0.747682	0.0023244	0.00657713
ENSDARG00000105551	12.9928	4.66037	0.98661	0.00232479	0.00657713
ENSDARG00000045733	17.0411	3.54947	0.699131	0.00233775	0.0066088
ENSDARG00000097328	53.2481	-3.48291	0.684188	0.00235176	0.00664336
ENSDARG00000086411	84.696	2.65261	0.506629	0.00236089	0.00666411
ENSDARG00000039878	30.9195	2.93295	0.564853	0.00236368	0.00666694
ENSDARG00000044016	157.85	-1.86702	0.350593	0.00236697	0.00667119
ENSDARG00000057789	25.6029	4.54231	0.952026	0.00237005	0.00667482
ENSDARG00000014907	7.96835	4.29305	0.882305	0.00238198	0.00670336
ENSDARG00000003527	44.8318	2.66609	0.509621	0.00239292	0.00672907
ENSDARG00000053217	25.2023	4.11433	0.835848	0.0024264	0.00681809
ENSDARG00000074583	39.5978	-3.27433	0.638738	0.00243115	0.0068263
ENSDARG00000042094	67.1721	-2.56716	0.489781	0.00244319	0.00685496
ENSDARG00000015790	17.627	3.91418	0.786643	0.00245291	0.00686836
ENSDARG00000020176	49.2323	-4.02693	0.81443	0.00245238	0.00686836
ENSDARG00000090804	41.4047	-3.21058	0.625064	0.00245349	0.00686836
ENSDARG00000027182	105.355	2.43931	0.464097	0.00246159	0.00688069
ENSDARG00000068088	29.7399	4.29448	0.884015	0.00245988	0.00688069
ENSDARG00000013822	39.8253	3.29287	0.643155	0.00248095	0.00692964
ENSDARG00000097848	25.2465	3.44218	0.676556	0.00248646	0.00693983
ENSDARG00000079783	31.6436	3.57471	0.70672	0.00251061	0.00700198
ENSDARG00000045017	8.35463	4.51608	0.946954	0.00252995	0.00705067
ENSDARG00000017049	16.0917	3.3938	0.666209	0.00256804	0.00715146
ENSDARG00000035990	160.711	2.78717	0.536033	0.00262474	0.00730391
ENSDARG00000061794	40.2092	3.2011	0.624574	0.0026298	0.00731255
ENSDARG00000014106	47.3335	2.77947	0.53489	0.00268932	0.00747249
ENSDARG00000021346	449.489	-2.16279	0.410229	0.00272538	0.00756703
ENSDARG00000101009	10.7087	4.13441	0.845623	0.0027467	0.00762056
ENSDARG00000088449	137.192	2.4139	0.460772	0.002753	0.00763238
ENSDARG00000014571	143.07	2.47303	0.472778	0.00276767	0.00766736
ENSDARG00000024598	66.5807	-2.68068	0.515376	0.0028235	0.00781362
ENSDARG00000069485	21.8182	3.74293	0.749673	0.00282466	0.00781362
ENSDARG00000103848	68.0374	-2.84288	0.549551	0.00285695	0.00789709
ENSDARG00000074540	15.4686	3.96613	0.80444	0.00286776	0.00792109
ENSDARG00000030237	137.013	2.72875	0.526003	0.002874	0.00793247
ENSDARG00000058471	56.967	-3.3806	0.666486	0.0028776	0.00793654
ENSDARG00000087330	9.21782	4.45282	0.934552	0.00289922	0.00799026
ENSDARG00000023759	21.1826	4.25899	0.880877	0.00294654	0.00811467
ENSDARG00000099865	165.521	2.09291	0.397678	0.00297236	0.00817974
ENSDARG00000032405	191.023	2.70584	0.521923	0.00299304	0.0082306
ENSDARG00000078001	34.3113	-4.72865	1.02085	0.0029987	0.00824009
ENSDARG00000020107	121.929	2.82377	0.546732	0.0030028	0.00824301
ENSDARG00000059815	31.1837	3.37493	0.66633	0.00300418	0.00824301
ENSDARG00000077912	24.3527	2.7121	0.523426	0.00301488	0.00826628
ENSDARG00000015955	6.25022	4.73612	1.02368	0.00303646	0.00831935
ENSDARG00000043757	25.7401	3.56195	0.70928	0.0031807	0.00870813
ENSDARG00000042518	102.87	-2.2462	0.429338	0.00319869	0.00875097
ENSDARG00000009783	10.8344	4.13278	0.851001	0.00320401	0.0087591
ENSDARG00000033861	7.07882	4.58367	0.978287	0.0032219	0.00880155
ENSDARG00000061023	73.6498	-2.84514	0.55268	0.00324318	0.00885323
ENSDARG00000016733	16.3662	4.00136	0.817591	0.00328555	0.00896231
ENSDARG00000019707	100.222	-2.37512	0.455847	0.00333974	0.0091035
ENSDARG00000031649	9.12774	4.3642	0.915597	0.00337019	0.00917979
ENSDARG00000069496	13.4305	4.32966	0.906269	0.00337411	0.00918377
ENSDARG00000052789	22.3096	3.51803	0.702038	0.00339941	0.00924588
ENSDARG00000007359	7.05157	4.57928	0.97976	0.00342721	0.00931471
ENSDARG00000105201	62.7077	2.86141	0.557389	0.00344855	0.00936587
ENSDARG00000036299	290.747	-1.35734	0.256295	0.00345114	0.00936609
ENSDARG00000003877	92.747	-2.25362	0.432078	0.00347571	0.00942591
ENSDARG00000014956	7.73005	4.25382	0.886785	0.00349779	0.00946991
ENSDARG00000079089	100.453	-2.26523	0.434526	0.00349608	0.00946991
ENSDARG00000089963	23.9678	4.03902	0.829855	0.00349955	0.00946991
ENSDARG00000016889	102.09	3.23731	0.639407	0.0035264	0.00953566
ENSDARG00000011418	12.65	4.47607	0.95059	0.00355131	0.00958218
ENSDARG00000052082	95.418	2.79005	0.543002	0.00354959	0.00958218
ENSDARG00000055054	59.1498	-2.67532	0.518807	0.00354936	0.00958218
ENSDARG00000103038	83.8357	-2.89236	0.564714	0.00356392	0.00960926
ENSDARG00000102741	72.3698	2.33426	0.448879	0.0036244	0.00976529
ENSDARG00000062154	134.998	-2.07479	0.396979	0.00364276	0.00980766
ENSDARG00000018562	34.2923	2.23392	0.428942	0.0036579	0.00984134
ENSDARG00000087377	44.096	-4.28632	0.897545	0.00372596	0.0100172
ENSDARG00000105465	33.777	2.82998	0.552436	0.00377307	0.0101366
ENSDARG00000079348	23.0537	-4.67634	1.0158	0.00379115	0.0101778
ENSDARG00000039851	11.5724	4.00175	0.823112	0.00379737	0.0101872
ENSDARG00000008237	154.666	2.41331	0.466025	0.00388599	0.0104174
ENSDARG00000061819	59.7753	-2.65488	0.516384	0.00392004	0.0105012
ENSDARG00000056924	14.8197	3.99401	0.822298	0.00392787	0.0105146
ENSDARG00000045006	123.636	-2.07483	0.398127	0.00397217	0.0106256
ENSDARG00000053133	64.3731	-2.64112	0.513924	0.00397584	0.0106278
ENSDARG00000053753	18.6487	4.28867	0.901968	0.00401331	0.0107126
ENSDARG00000059057	23.1015	3.92965	0.806391	0.00401171	0.0107126
ENSDARG00000057706	9.35514	4.68689	1.02255	0.00401634	0.010713
ENSDARG00000037284	24.7578	3.87914	0.794026	0.004034	0.0107524
ENSDARG00000038574	132.165	1.6612	0.316717	0.00405228	0.0107934
ENSDARG00000009806	19.114	3.51659	0.706809	0.00410131	0.0109099
ENSDARG00000076584	116.301	-2.47116	0.479229	0.00410184	0.0109099
ENSDARG00000009735	406.529	-1.48816	0.283177	0.00428374	0.0113856
ENSDARG00000059363	61.6611	-2.97618	0.586802	0.00432994	0.0115002
ENSDARG00000100952	107.611	3.71515	0.756029	0.00433941	0.0115171
ENSDARG00000024540	38.4954	4.3046	0.909713	0.00436026	0.0115642
ENSDARG00000036359	7.4384	4.43564	0.947909	0.00437415	0.0115928
ENSDARG00000105463	18.1677	4.52747	0.975892	0.00442771	0.0117265
ENSDARG00000025468	44.5564	-3.50731	0.707144	0.00446393	0.011814
ENSDARG00000038905	154.451	-2.00274	0.385505	0.00447653	0.0118389
ENSDARG00000029995	50.2741	4.03542	0.837783	0.00454024	0.0119989
ENSDARG00000014348	7.95451	4.21619	0.886873	0.00454884	0.0120132
ENSDARG00000025254	63.4954	2.91095	0.573995	0.00456314	0.0120424
ENSDARG00000059711	13.4036	3.63483	0.738248	0.00456825	0.0120474
ENSDARG00000014727	90.2771	-2.60642	0.509305	0.00457473	0.0120559
ENSDARG00000007285	24.08	3.72729	0.760709	0.0045828	0.0120687
ENSDARG00000012586	262.064	-2.17793	0.421144	0.00463776	0.0122048
ENSDARG00000008966	250.918	-2.02924	0.391348	0.00469504	0.0123468
ENSDARG00000086332	19.6037	3.65307	0.743604	0.00471123	0.012372
ENSDARG00000091656	11.1467	4.1218	0.862483	0.00471107	0.012372
ENSDARG00000095147	40.3335	5.02151	1.16032	0.00479069	0.0125718
ENSDARG00000089505	191.136	-1.81024	0.348095	0.00479536	0.0125752
ENSDARG00000078087	70.2982	-2.22529	0.431464	0.00481663	0.0126221
ENSDARG00000090170	166.616	-1.86132	0.35831	0.00482952	0.012647
ENSDARG00000037980	110.586	2.5148	0.491191	0.00485725	0.0127107
ENSDARG00000036704	47.9164	3.412	0.687526	0.00487854	0.0127575
ENSDARG00000034693	40.7491	2.24751	0.436265	0.00492824	0.0128784
ENSDARG00000040884	64.457	2.52306	0.493283	0.00493444	0.0128856
ENSDARG00000012513	25.3731	3.87335	0.799506	0.00496054	0.0129401
ENSDARG00000038537	7.3998	4.10294	0.859524	0.00496225	0.0129401
ENSDARG00000033447	18.6462	4.4416	0.955651	0.00499782	0.0130238
ENSDARG00000040874	122.254	2.54357	0.497826	0.00502624	0.0130887
ENSDARG00000086826	30.429	3.8748	0.800505	0.00504989	0.0131411
ENSDARG00000053326	43.1439	2.93594	0.581716	0.00505838	0.013154
ENSDARG00000019096	8.44262	4.02653	0.840187	0.00509437	0.0132291
ENSDARG00000020123	158.849	-1.66989	0.320984	0.00509257	0.0132291
ENSDARG00000006316	1772.48	1.64807	0.316762	0.005115	0.0132735
ENSDARG00000053656	43.9626	3.1937	0.639051	0.00512026	0.0132779
ENSDARG00000035563	70.5091	2.49185	0.487469	0.00513033	0.0132948
ENSDARG00000007955	54.9446	2.67818	0.526679	0.00517966	0.0134133
ENSDARG00000004297	62.7439	2.2108	0.429723	0.00521318	0.0134908
ENSDARG00000103644	8.52471	4.21474	0.892088	0.00522171	0.0135035
ENSDARG00000052894	72.9155	-2.21021	0.429731	0.00523317	0.0135237
ENSDARG00000090213	129.53	3.51919	0.714742	0.00523849	0.0135281
ENSDARG00000070427	21.6508	4.15234	0.875044	0.00525305	0.0135563
ENSDARG00000101680	72.9611	2.31883	0.452085	0.0053299	0.0137451
ENSDARG00000054155	41.6474	3.02432	0.602316	0.00534472	0.0137738
ENSDARG00000060597	81.5974	-2.63027	0.517335	0.00537947	0.0138538
ENSDARG00000104848	34.3356	3.28012	0.65993	0.00541467	0.0139349
ENSDARG00000012932	15.2604	4.23849	0.900319	0.00542702	0.013957
ENSDARG00000053130	68.3169	3.52814	0.717931	0.00547774	0.0140777
ENSDARG00000016238	45.3975	2.96115	0.589054	0.00550383	0.0141351
ENSDARG00000006266	51.9153	2.89461	0.574627	0.00551518	0.0141545
ENSDARG00000006786	11.7302	3.84364	0.795778	0.00553521	0.0141961
ENSDARG00000020449	53.9832	3.337	0.673743	0.0055489	0.0142215
ENSDARG00000024314	8.05909	4.44527	0.962031	0.005558	0.014235
ENSDARG00000078250	127.028	2.48434	0.487392	0.00556209	0.0142357
ENSDARG00000016864	19.5245	3.47275	0.70553	0.00560636	0.0143392
ENSDARG00000104665	91.7731	-2.27993	0.445158	0.00567197	0.0144971
ENSDARG00000052016	125.682	-2.24554	0.438282	0.00570809	0.0145794
ENSDARG00000104431	18.2507	3.66998	0.753673	0.00576025	0.0147025
ENSDARG00000101180	180.525	2.97947	0.59423	0.00578249	0.0147492
ENSDARG00000078088	92.9948	-2.39191	0.468834	0.00584741	0.0149046
ENSDARG00000099186	77.5431	-2.18692	0.426754	0.00588747	0.0149965
ENSDARG00000105243	31.5411	3.11504	0.624872	0.00591619	0.0150594
ENSDARG00000016754	25.919	3.09276	0.620002	0.00592637	0.015075
ENSDARG00000028448	6.55003	4.58474	1.00954	0.00598186	0.0152058
ENSDARG00000041397	11.6252	3.94015	0.823434	0.00603139	0.0153212
ENSDARG00000073902	79.0917	-2.50326	0.492859	0.00604097	0.0153351
ENSDARG00000061093	51.576	-2.75371	0.546139	0.00607405	0.0154086
ENSDARG00000088929	37.7708	3.3254	0.673577	0.00611977	0.0155141
ENSDARG00000097441	15.8562	4.27301	0.915383	0.00622617	0.0157731
ENSDARG00000010583	154.217	-1.7665	0.342655	0.00623533	0.0157856
ENSDARG00000005186	57.5547	2.65473	0.525617	0.00625333	0.0158097
ENSDARG00000043663	27.2136	3.88545	0.810734	0.00624919	0.0158097
ENSDARG00000019338	13.5644	4.22403	0.902291	0.00630527	0.0159302
ENSDARG00000018904	58.1531	1.98591	0.386963	0.00631711	0.0159467
ENSDARG00000091306	155.725	-1.77019	0.343574	0.00632033	0.0159467
ENSDARG00000054973	634.8	-1.31087	0.252714	0.00644831	0.0162586
ENSDARG00000035282	19.6945	4.66249	1.04052	0.00649779	0.0163723
ENSDARG00000078650	47.1755	-3.12395	0.629321	0.00651214	0.0163974
ENSDARG00000074899	53.5075	2.20166	0.43149	0.00655147	0.0164853
ENSDARG00000013087	23.5291	3.73278	0.773664	0.00659027	0.0165717
ENSDARG00000104538	20.5485	3.32301	0.675247	0.00662184	0.0166399
ENSDARG00000061039	31.9625	2.79945	0.557978	0.00673013	0.0168929
ENSDARG00000063242	16.4712	3.95428	0.831457	0.00673157	0.0168929
ENSDARG00000100510	64.5555	3.01778	0.606378	0.006814	0.0170883
ENSDARG00000101635	45.237	-3.88395	0.813507	0.00684012	0.0171422
ENSDARG00000045514	50.108	3.14346	0.635027	0.00693625	0.0173715
ENSDARG00000011665	48.4807	3.10057	0.625674	0.00697985	0.017469
ENSDARG00000075445	34.003	3.42021	0.699652	0.00709385	0.0177424
ENSDARG00000079823	11.6536	4.08844	0.869715	0.00711671	0.0177757
ENSDARG00000098443	42.6772	3.4242	0.701065	0.00711298	0.0177757
ENSDARG00000013505	67.3152	1.93369	0.378085	0.00713399	0.017807
ENSDARG00000052578	20.4882	4.39561	0.958852	0.0071861	0.017925
ENSDARG00000024651	19.1828	4.51911	0.998234	0.00730424	0.0182076
ENSDARG00000023330	536.072	-1.72324	0.335975	0.0073543	0.0183201
ENSDARG00000043848	144.823	2.41928	0.478844	0.0073758	0.0183542
ENSDARG00000061205	90.4103	-2.08904	0.410303	0.00737781	0.0183542
ENSDARG00000099741	10.0262	4.61086	1.03034	0.00743479	0.0184836
ENSDARG00000042151	52.9865	2.38303	0.471424	0.00762053	0.0189328
ENSDARG00000098242	43.8022	-2.69728	0.538819	0.00764082	0.0189705
ENSDARG00000037815	106.995	-2.54444	0.506063	0.00764778	0.0189752
ENSDARG00000090149	22.2279	-4.51344	0.999664	0.00772456	0.019153
ENSDARG00000102822	32.9266	3.44351	0.708151	0.00775862	0.0192246
ENSDARG00000078125	44.1602	3.01222	0.608551	0.00776576	0.0192295
ENSDARG00000102586	21.7458	3.46655	0.713828	0.00778692	0.0192692
ENSDARG00000032866	63.1986	2.68838	0.537345	0.00787669	0.0194784
ENSDARG00000018765	7.69412	4.15653	0.892919	0.00789483	0.0195103
ENSDARG00000045835	8.43039	4.70487	1.06784	0.00793316	0.0195851
ENSDARG00000096849	97.3694	3.7549	0.785693	0.00793559	0.0195851
ENSDARG00000099995	93.3432	-2.02813	0.398918	0.00803695	0.0198221
ENSDARG00000031795	674.576	1.77701	0.348006	0.00813909	0.0200608
ENSDARG00000028517	343.077	2.26531	0.448368	0.00817474	0.0201354
ENSDARG00000019998	26.3615	3.88219	0.819654	0.00820883	0.020206
ENSDARG00000059116	63.0229	2.82023	0.567234	0.00822996	0.0202447
ENSDARG00000017490	51.4889	3.28435	0.672354	0.00831675	0.0204447
ENSDARG00000032155	151.284	-1.93507	0.380582	0.00833098	0.0204527
ENSDARG00000036943	65.583	-2.14494	0.423706	0.00832598	0.0204527
ENSDARG00000059298	51.9451	3.62887	0.755646	0.00837163	0.020539
ENSDARG00000022895	7.51819	4.45254	0.984669	0.00846121	0.0207426
ENSDARG00000101082	145.256	2.54216	0.50757	0.00846572	0.0207426
ENSDARG00000063155	62.3921	-2.23021	0.441712	0.00848689	0.0207808
ENSDARG00000104358	47.6843	-3.38708	0.697556	0.00852199	0.0208361
ENSDARG00000104596	59.5206	3.02967	0.614675	0.00851749	0.0208361
ENSDARG00000105641	85.1036	-2.56149	0.511854	0.00852624	0.0208361
ENSDARG00000098635	46.2184	2.62094	0.524649	0.00865633	0.0211402
ENSDARG00000040778	13.6912	3.92667	0.833562	0.00868694	0.0212011
ENSDARG00000087765	123.995	3.95536	0.841382	0.00874556	0.0213302
ENSDARG00000070391	31.9155	3.45571	0.714785	0.00876513	0.021364
ENSDARG00000098631	52.1873	-3.55231	0.738361	0.00885043	0.0215578
ENSDARG00000077581	99.2379	-1.92315	0.379015	0.0088697	0.0215906
ENSDARG00000055395	7.7651	4.14792	0.895526	0.0088893	0.0216242
ENSDARG00000086618	29.8081	3.38853	0.69915	0.00890049	0.0216374
ENSDARG00000028815	8.2875	4.16243	0.899826	0.00898382	0.0218257
ENSDARG00000020574	176.127	2.02106	0.399328	0.00899354	0.0218351
ENSDARG00000087017	11.1278	4.18066	0.905526	0.00915758	0.0222189
ENSDARG00000070573	38.1196	2.59125	0.519699	0.009385	0.0227559
ENSDARG00000006215	13.3471	4.25336	0.929124	0.00946261	0.0228921
ENSDARG00000011170	164.2	1.88658	0.372481	0.00946571	0.0228921
ENSDARG00000013921	63.3278	-2.18665	0.434471	0.00945916	0.0228921
ENSDARG00000035880	36.6049	3.73349	0.786032	0.00945629	0.0228921
ENSDARG00000069116	17.3856	4.00931	0.859416	0.00952003	0.0230086
ENSDARG00000019417	98.4611	2.3815	0.475585	0.00968036	0.0233809
ENSDARG00000039682	10.8925	4.20521	0.915939	0.00969688	0.0233936
ENSDARG00000104869	53.898	-3.27184	0.673988	0.00969816	0.0233936
ENSDARG00000052304	60.9081	3.08121	0.629754	0.00971699	0.0234239
ENSDARG00000101835	41.6382	-4.51487	1.01311	0.00973057	0.0234415
ENSDARG00000068624	95.3782	-2.17112	0.431702	0.00975896	0.0234947
ENSDARG00000015732	45.2435	-3.05755	0.624507	0.00977984	0.0235298
ENSDARG00000012369	10.3771	3.91726	0.835695	0.00982091	0.0236065
ENSDARG00000018825	53.0435	3.28519	0.677493	0.00982437	0.0236065
ENSDARG00000059805	6.20177	4.45394	0.993487	0.00991032	0.0237977
ENSDARG00000003109	12.2793	3.78188	0.800435	0.00996603	0.0239161
ENSDARG00000054058	316.74	2.337	0.466989	0.0102053	0.0244744
ENSDARG00000015325	142.583	2.52087	0.5067	0.010398	0.0249206
ENSDARG00000043902	39.7804	-4.45041	0.995355	0.0104364	0.0249967
ENSDARG00000033840	93.9428	-2.19943	0.438798	0.0104525	0.0250191
ENSDARG00000076697	165.758	-2.03459	0.404436	0.0105218	0.0251689
ENSDARG00000044125	51.2433	2.88745	0.587876	0.0106075	0.0253576
ENSDARG00000099358	38.9674	3.02581	0.619378	0.010695	0.0255505
ENSDARG00000001785	57.0122	-2.36829	0.474923	0.0107203	0.025581
ENSDARG00000060868	53.4833	2.65961	0.537836	0.0107215	0.025581
ENSDARG00000098999	14.5963	3.53425	0.740324	0.010771	0.0256826
ENSDARG00000016153	55.2744	2.81749	0.572788	0.0108529	0.0258613
ENSDARG00000077177	48.3849	-3.89637	0.834081	0.0108613	0.025865
ENSDARG00000100055	200.72	2.93434	0.599194	0.0109361	0.0260264
ENSDARG00000012234	22.4994	3.10434	0.638617	0.011109	0.0264001
ENSDARG00000031098	17.428	4.06778	0.882334	0.0111143	0.0264001
ENSDARG00000078041	14.0686	3.2174	0.664545	0.0111085	0.0264001
ENSDARG00000039830	38.5018	4.79655	1.12773	0.0111391	0.0264253
ENSDARG00000054864	1143.7	1.32917	0.261664	0.0111377	0.0264253
ENSDARG00000043448	129.298	2.1083	0.42079	0.0112245	0.0266109
ENSDARG00000041078	26.5546	3.32136	0.689928	0.0113251	0.0268325
ENSDARG00000004796	25.226	2.94455	0.602527	0.01144	0.0270875
ENSDARG00000103683	63.1435	-2.22265	0.445256	0.0114976	0.0272065
ENSDARG00000098103	41.422	-3.14007	0.647828	0.0115477	0.0273077
ENSDARG00000023627	491.58	-1.6373	0.324257	0.0116578	0.0275506
ENSDARG00000018460	53.7142	2.74573	0.558643	0.0116778	0.0275806
ENSDARG00000092364	7.2981	4.50512	1.02014	0.0117422	0.0277151
ENSDARG00000042296	16.8988	3.67961	0.780326	0.0118492	0.0279323
ENSDARG00000086985	73.1681	-2.02755	0.40478	0.0118448	0.0279323
ENSDARG00000008380	128.004	2.37649	0.478663	0.011904	0.0280257
ENSDARG00000032535	6.39978	4.35746	0.972374	0.0119114	0.0280257
ENSDARG00000039969	79.0256	-2.28137	0.458305	0.0118982	0.0280257
ENSDARG00000018049	160.375	2.15738	0.432189	0.0119604	0.0281234
ENSDARG00000006497	274.029	2.49155	0.503528	0.0119713	0.0281313
ENSDARG00000099197	467.731	2.71538	0.552513	0.0120818	0.0283731
ENSDARG00000055416	21.549	3.57139	0.753496	0.0120988	0.0283951
ENSDARG00000088117	39.8752	-4.25084	0.939944	0.0121715	0.0285477
ENSDARG00000018149	66.1197	2.80583	0.573016	0.0121992	0.0285947
ENSDARG00000041295	7.43304	4.64738	1.07642	0.0126357	0.0295808
ENSDARG00000060948	120.232	2.89847	0.59391	0.0126341	0.0295808
ENSDARG00000087937	66.85	2.96382	0.609635	0.0126902	0.0296896
ENSDARG00000044062	268.866	-1.89651	0.378727	0.0128282	0.0299939
ENSDARG00000007989	19.3975	3.92229	0.848875	0.0132181	0.0308667
ENSDARG00000040799	10.2075	4.42782	0.999262	0.013212	0.0308667
ENSDARG00000060641	44.3672	-4.06986	0.890408	0.0133109	0.031064
ENSDARG00000034270	98.2163	1.61008	0.320568	0.0134382	0.031322
ENSDARG00000054320	170.784	2.27322	0.458665	0.0134369	0.031322
ENSDARG00000038608	14.6663	4.30249	0.961127	0.0135793	0.0316309
ENSDARG00000014196	85.6736	3.54795	0.751487	0.0136058	0.0316729
ENSDARG00000000861	96.1165	1.55293	0.309114	0.0136813	0.0318089
ENSDARG00000017659	36.0908	3.97167	0.863776	0.0136772	0.0318089
ENSDARG00000036994	35.3528	-3.41353	0.718788	0.0139168	0.0323163
ENSDARG00000101291	8.7026	4.43424	1.00497	0.0139092	0.0323163
ENSDARG00000062305	48.0669	-3.10181	0.644062	0.0140071	0.0325058
ENSDARG00000102379	20.3617	3.03247	0.628085	0.0140245	0.032526
ENSDARG00000026183	25.0851	3.51016	0.743056	0.0140549	0.0325763
ENSDARG00000017489	21.4778	3.7667	0.809245	0.0140894	0.0326359
ENSDARG00000076719	11.5722	4.13239	0.911508	0.0141063	0.0326549
ENSDARG00000102051	318.063	2.93781	0.606456	0.0141255	0.0326788
ENSDARG00000092787	11.112	4.44058	1.00891	0.0141385	0.0326887
ENSDARG00000004597	76.725	2.61538	0.534061	0.0142854	0.0330078
ENSDARG00000040623	121.715	2.06346	0.415515	0.0143741	0.0331592
ENSDARG00000041569	14.0062	3.86762	0.837011	0.0143644	0.0331592
ENSDARG00000051816	56.2442	-2.31128	0.468219	0.0143775	0.0331592
ENSDARG00000099455	16.842	3.77172	0.811432	0.0144012	0.0331933
ENSDARG00000027749	156.034	2.11791	0.427051	0.014514	0.0334327
ENSDARG00000069461	22.7373	3.39513	0.715597	0.014546	0.0334857
ENSDARG00000020232	55.1446	2.07043	0.417191	0.0146118	0.0336163
ENSDARG00000009779	109.325	2.646	0.541553	0.014621	0.0336168
ENSDARG00000000069	80.2281	4.23811	0.945234	0.0146615	0.0336891
ENSDARG00000104375	111.394	2.42166	0.492423	0.0146928	0.0337403
ENSDARG00000069168	90.072	-2.52053	0.514021	0.0147507	0.0338525
ENSDARG00000009740	18.8391	3.62713	0.774503	0.0147922	0.0339269
ENSDARG00000056480	22.3498	4.242	0.947014	0.0148109	0.0339489
ENSDARG00000042845	7.30585	4.29336	0.963189	0.0148348	0.0339829
ENSDARG00000055514	88.1294	4.57345	1.05897	0.0149464	0.0341954
ENSDARG00000079388	390.649	-1.65783	0.331701	0.0149551	0.0341954
ENSDARG00000100275	54.8187	1.87363	0.376369	0.0149536	0.0341954
ENSDARG00000038000	8.43446	4.34002	0.978664	0.0149914	0.0342573
ENSDARG00000079446	17.071	4.0592	0.892861	0.0150061	0.0342701
ENSDARG00000013968	294.924	1.79689	0.360473	0.0151061	0.0344772
ENSDARG00000092387	8.95748	4.20865	0.937758	0.015312	0.0349259
ENSDARG00000042874	35.325	3.53347	0.751857	0.0153695	0.0350357
ENSDARG00000075382	5.82053	4.4091	1.003	0.0157314	0.0358386
ENSDARG00000101233	45.2716	-2.78353	0.574027	0.0157548	0.0358701
ENSDARG00000031095	71.5925	-3.23327	0.678737	0.0157794	0.0359042
ENSDARG00000094300	19.6725	4.505	1.03785	0.015794	0.0359155
ENSDARG00000038768	66.2575	2.59651	0.532287	0.0158202	0.0359533
ENSDARG00000075261	36.3271	3.1504	0.659062	0.015849	0.0359966
ENSDARG00000009585	97.167	2.57722	0.528094	0.0159637	0.0362351
ENSDARG00000013708	174.515	1.20632	0.240386	0.0160026	0.0363013
ENSDARG00000040727	10.473	3.78356	0.81867	0.0160828	0.0364612
ENSDARG00000099214	54.7027	3.81585	0.827589	0.0161928	0.0366882
ENSDARG00000043388	6.15583	4.49935	1.0374	0.0162636	0.0368262
ENSDARG00000052623	103.292	2.20573	0.447841	0.0163464	0.0369913
ENSDARG00000006467	44.1415	-4.07203	0.900477	0.016463	0.0372325
ENSDARG00000007220	141.696	-1.82021	0.366638	0.0165707	0.0374536
ENSDARG00000034497	9.5221	4.16371	0.928498	0.0166408	0.0375892
ENSDARG00000088398	17.5475	3.90758	0.854201	0.0166898	0.037677
ENSDARG00000059079	40.8112	2.73844	0.565243	0.0169091	0.0381491
ENSDARG00000092115	84.9099	3.32083	0.702109	0.0169729	0.0382698
ENSDARG00000004343	62.2244	2.11985	0.43025	0.0170484	0.0384168
ENSDARG00000042777	47.5468	3.09755	0.648637	0.0170617	0.0384236
ENSDARG00000060199	18.0094	3.81508	0.829701	0.017202	0.0387162
ENSDARG00000046048	6.64707	4.25332	0.958152	0.0172163	0.0387251
ENSDARG00000055510	27.3541	3.0028	0.626641	0.0173329	0.0389638
ENSDARG00000029783	44.6757	2.38632	0.488042	0.0174431	0.039188
ENSDARG00000023058	209.978	2.37727	0.486194	0.0174712	0.0392274
ENSDARG00000024877	24.2868	3.44132	0.733013	0.0174872	0.0392398
ENSDARG00000074034	39.2343	-3.73938	0.810207	0.0175907	0.0394482
ENSDARG00000063167	8.84095	4.32506	0.982462	0.0177745	0.0398367
ENSDARG00000029204	66.2816	4.47637	1.03486	0.0177962	0.0398613
ENSDARG00000003290	47.2316	-2.64408	0.545518	0.0180009	0.0402954
ENSDARG00000056019	118.813	-1.95412	0.396073	0.0182437	0.0408146
ENSDARG00000041137	24.5691	3.0475	0.638692	0.0183842	0.0411043
ENSDARG00000077652	23.6974	3.31244	0.702639	0.0185325	0.0414111
ENSDARG00000078981	32.252	-3.65184	0.789135	0.0187465	0.0418641
ENSDARG00000062430	100.072	-2.03546	0.413961	0.0187645	0.0418792
ENSDARG00000011055	22.3095	3.2496	0.687895	0.0188573	0.0420612
ENSDARG00000030125	29.9374	2.86572	0.597217	0.019021	0.0424011
ENSDARG00000073841	523.784	-1.44164	0.290151	0.0190682	0.0424808
ENSDARG00000030824	23.8335	2.81394	0.5856	0.0191307	0.0425946
ENSDARG00000045980	25.9549	3.55551	0.765159	0.0192933	0.042931
ENSDARG00000060113	28.9623	3.17993	0.671842	0.0194138	0.0431734
ENSDARG00000018285	136.819	2.97547	0.623455	0.0194341	0.0431928
ENSDARG00000014634	25.1855	3.41551	0.730031	0.0194518	0.0432065
ENSDARG00000073710	484.818	-1.61671	0.326581	0.0196549	0.0436317
ENSDARG00000078497	128.546	-1.73752	0.351882	0.0198365	0.0440086
ENSDARG00000043635	13.3035	4.007	0.890153	0.0198673	0.0440508
ENSDARG00000004270	45.232	2.81836	0.587629	0.0203096	0.0450047
ENSDARG00000007247	39.7021	3.69332	0.803568	0.0205894	0.0455976
ENSDARG00000102407	13.9354	3.59247	0.777388	0.0206547	0.045715
ENSDARG00000097845	7.72638	3.87843	0.855037	0.0207685	0.0459398
ENSDARG00000063474	82.3928	2.02937	0.414364	0.0207939	0.0459687
ENSDARG00000069765	229.348	-1.59913	0.323786	0.0208123	0.0459821
ENSDARG00000012076	36.3365	3.86217	0.850784	0.0208508	0.0460399
ENSDARG00000045132	397.598	2.46639	0.509404	0.021048	0.0464478
ENSDARG00000055433	75.9397	1.94965	0.397603	0.0213193	0.0470187
ENSDARG00000045447	56.5536	2.97302	0.625392	0.0213451	0.0470478
ENSDARG00000028096	7.86116	4.20169	0.952858	0.0215796	0.0475365
ENSDARG00000061631	118.285	-2.15245	0.44145	0.0216062	0.0475671
ENSDARG00000090232	64.5275	2.74893	0.57378	0.0217182	0.0477856
ENSDARG00000027497	33.0427	-3.99818	0.891662	0.02184	0.0480252
ENSDARG00000056037	47.2325	-3.60422	0.782621	0.0222711	0.0489443
ENSDARG00000092478	10.0364	3.63759	0.792178	0.0224876	0.0493909
ENSDARG00000000370	42.8335	-2.80403	0.587423	0.0225154	0.0494231
ENSDARG00000005834	108.776	-2.14586	0.44079	0.0225626	0.0494975
ENSDARG00000036670	26.1818	3.4261	0.737683	0.0225759	0.0494976
ENSDARG00000070479	29.7278	3.31808	0.710517	0.0226567	0.0496456
ENSDARG00000022410	53.2009	2.16604	0.44527	0.0227466	0.0498132
ENSDARG00000014137	33.2415	2.65036	0.552555	0.0228406	0.0499899
ENSDARG00000103937	331.413	2.36656	0.489228	0.022958	0.0502174
ENSDARG00000093480	31.71	-3.18482	0.678199	0.0231872	0.050689
ENSDARG00000034215	13.0003	4.15889	0.943575	0.0232311	0.0507552
ENSDARG00000103980	89.4272	2.3788	0.492272	0.0236297	0.0515958
ENSDARG00000051875	38.8267	2.98855	0.631865	0.0238348	0.0520132
ENSDARG00000007279	17.6643	4.04117	0.908752	0.0238654	0.0520496
ENSDARG00000094181	45.009	-3.09329	0.657169	0.0239002	0.0520951
ENSDARG00000062330	183.74	-1.52453	0.31001	0.0239403	0.0521519
ENSDARG00000011376	6.54133	4.41188	1.03	0.0241264	0.0525266
ENSDARG00000098458	3303.75	1.31892	0.267477	0.0243311	0.0529416
ENSDARG00000053992	60.0966	-2.2924	0.474173	0.0243635	0.052981
ENSDARG00000044144	190.062	-1.3313	0.270139	0.0245274	0.0533064
ENSDARG00000030213	158.481	2.4561	0.51056	0.0246675	0.0535798
ENSDARG00000028228	556.874	-1.60712	0.327668	0.0247194	0.0536612
ENSDARG00000076330	5.80081	4.17147	0.950832	0.02489	0.0540002
ENSDARG00000009484	30.7032	2.71617	0.569712	0.0250056	0.0542194
ENSDARG00000003293	47.7396	-3.17235	0.677735	0.0250582	0.0542994
ENSDARG00000069242	8.62576	3.70723	0.815469	0.0250716	0.0542994
ENSDARG00000008434	93.9027	-1.81076	0.370826	0.0255512	0.0553061
ENSDARG00000063149	17.657	3.24929	0.697349	0.0256258	0.0554354
ENSDARG00000004525	39.9348	3.13328	0.669056	0.0257374	0.0556122
ENSDARG00000043802	11.4875	3.77359	0.834652	0.0257252	0.0556122
ENSDARG00000034470	29.9285	3.71692	0.819181	0.0258706	0.0558679
ENSDARG00000053404	449.874	1.79525	0.368004	0.0258898	0.0558769
ENSDARG00000101216	21.699	3.14259	0.671516	0.0262432	0.0566068
ENSDARG00000043279	5.70995	4.33924	1.00987	0.026419	0.0569531
ENSDARG00000044902	707.58	1.74616	0.357941	0.0264917	0.0570439
ENSDARG00000087887	35.0619	2.64347	0.554503	0.0264873	0.0570439
ENSDARG00000090949	64.9315	-2.35369	0.4894	0.0266226	0.0572928
ENSDARG00000021739	38.638	-2.89538	0.613089	0.0269446	0.0579522
ENSDARG00000036376	6.00972	4.2032	0.965589	0.0270307	0.058104
ENSDARG00000070371	37.5636	-3.4903	0.760489	0.0270804	0.0581774
ENSDARG00000004836	147.85	2.55223	0.53457	0.0273622	0.0586813
ENSDARG00000027744	155.57	2.31521	0.481325	0.0273387	0.0586813
ENSDARG00000093120	64.1435	-2.45262	0.512115	0.02736	0.0586813
ENSDARG00000079939	387.12	-1.34487	0.274211	0.0274199	0.0587713
ENSDARG00000006546	10.71	3.75953	0.833523	0.027859	0.0596781
ENSDARG00000068096	105.224	-2.08246	0.430861	0.0278831	0.0596956
ENSDARG00000105114	476.321	-1.34818	0.275106	0.0279117	0.0597224
ENSDARG00000105147	78.1094	-1.95936	0.404275	0.027962	0.0597959
ENSDARG00000038312	77.9167	4.23836	0.979189	0.0281799	0.0602274
ENSDARG00000105109	9.57155	3.78011	0.840413	0.0283347	0.0605235
ENSDARG00000052950	158.913	-1.6723	0.343266	0.0284729	0.060784
ENSDARG00000082753	7199.4	1.71313	0.351983	0.0285243	0.0608589
ENSDARG00000100031	21.4722	3.22963	0.695943	0.0288997	0.0616246
ENSDARG00000008184	111.99	1.69926	0.349254	0.0290112	0.061827
ENSDARG00000060504	50.1893	-2.63011	0.553778	0.0291485	0.0620486
ENSDARG00000070617	7.18408	4.28751	0.99788	0.0291442	0.0620486
ENSDARG00000006314	64.5293	-2.18487	0.45405	0.0292843	0.0623023
ENSDARG00000009640	54.028	1.95889	0.404974	0.0293026	0.0623057
ENSDARG00000091138	29.7714	-4.29202	1.00001	0.0295982	0.0628983
ENSDARG00000015653	180.64	1.4954	0.306722	0.0299785	0.0636341
ENSDARG00000057918	71.4616	2.12692	0.441644	0.0299725	0.0636341
ENSDARG00000090788	21.9569	2.54055	0.534004	0.0303869	0.0644642
ENSDARG00000017168	17.723	3.11384	0.669313	0.0307115	0.0651158
ENSDARG00000014058	42.9239	-3.66852	0.812956	0.0307784	0.0652207
ENSDARG00000017772	302.587	2.35864	0.493604	0.0309485	0.0655304
ENSDARG00000021899	7.29083	3.91498	0.883322	0.0309597	0.0655304
ENSDARG00000068820	13.6103	4.20717	0.974475	0.0311765	0.0659519
ENSDARG00000042319	67.301	-2.21103	0.461096	0.0313472	0.0662755
ENSDARG00000057912	126.717	2.25748	0.471473	0.0314353	0.066424
ENSDARG00000026109	9.10839	4.01376	0.913733	0.0315342	0.0665954
ENSDARG00000018853	28.3397	3.14516	0.678148	0.031724	0.0669583
ENSDARG00000036776	14.1054	3.79548	0.849784	0.0320522	0.0676128
ENSDARG00000058047	33.8447	3.46591	0.760238	0.032159	0.0677997
ENSDARG00000027649	8.2301	3.85362	0.867099	0.032216	0.0678816
ENSDARG00000088030	1846.98	2.19134	0.457384	0.0324705	0.0683792
ENSDARG00000007531	24.6823	2.49896	0.526372	0.0325096	0.0684229
ENSDARG00000098859	123.72	-2.11161	0.440021	0.0325369	0.0684418
ENSDARG00000037846	54.8665	1.98211	0.411783	0.0325867	0.0685078
ENSDARG00000076867	48.6831	-2.76915	0.588754	0.0331162	0.0695819
ENSDARG00000027141	38.9637	2.24621	0.470064	0.0332226	0.0697662
ENSDARG00000044632	30.4388	-3.46874	0.762286	0.0334237	0.070149
ENSDARG00000052012	18.5822	3.50806	0.772906	0.0334901	0.0702489
ENSDARG00000079687	119.288	2.34095	0.491412	0.0336053	0.0704509
ENSDARG00000103525	25.88	-4.38588	1.04198	0.0336946	0.0705984
ENSDARG00000099961	110.263	2.12851	0.444396	0.0337977	0.0707746
ENSDARG00000098992	11.3984	3.64853	0.811295	0.0341781	0.0715312
ENSDARG00000036186	63.7966	2.94913	0.632767	0.0343368	0.071823
ENSDARG00000087835	13.3304	4.20842	0.980691	0.0343578	0.0718266
ENSDARG00000058729	7.05929	4.31149	1.01635	0.0345303	0.0721468
ENSDARG00000013122	30.0357	2.64418	0.561113	0.0346349	0.0723249
ENSDARG00000102055	32.7503	3.86182	0.87282	0.0347579	0.0725412
ENSDARG00000098686	35.1813	-3.27023	0.712562	0.0349951	0.0729954
ENSDARG00000099997	11.243	3.78493	0.851011	0.035054	0.0730774
ENSDARG00000105670	15.7905	3.3173	0.724851	0.0354495	0.0738606
ENSDARG00000008491	89.5571	-2.27802	0.478517	0.0358057	0.0745612
ENSDARG00000098646	10.3399	3.83366	0.866092	0.0363091	0.0755673
ENSDARG00000029663	145.878	1.53465	0.317456	0.0363809	0.0756746
ENSDARG00000005416	21.2271	3.28322	0.717396	0.0364963	0.0758723
ENSDARG00000010149	123.469	1.91383	0.398897	0.0365652	0.0759732
ENSDARG00000078324	49.2812	-2.54193	0.539071	0.0368151	0.0764073
ENSDARG00000089921	36.965	3.15577	0.685405	0.0368066	0.0764073
ENSDARG00000028614	51.4012	2.79957	0.599121	0.0368981	0.076537
ENSDARG00000044332	64.9978	1.93965	0.404698	0.0370336	0.0767754
ENSDARG00000068030	92.0256	-2.07195	0.433709	0.0374825	0.0776628
ENSDARG00000063133	294.062	-1.1104	0.228605	0.0375884	0.077839
ENSDARG00000026476	11.9433	3.44597	0.760791	0.0379031	0.0784473
ENSDARG00000038156	10.6092	3.92295	0.895177	0.0382695	0.0791616
ENSDARG00000086150	6.48264	3.91287	0.892599	0.0386606	0.0799264
ENSDARG00000035188	67.593	-2.69989	0.576917	0.0388976	0.0803719
ENSDARG00000020841	16.1295	3.76539	0.850011	0.0389368	0.0804082
ENSDARG00000090764	123.59	1.88776	0.394308	0.0392467	0.0810033
ENSDARG00000063522	38.547	-3.19326	0.697083	0.0396859	0.0818647
ENSDARG00000016460	38.3171	2.2674	0.478453	0.039724	0.0818979
ENSDARG00000103199	17.0023	4.13155	0.963238	0.0399277	0.0822724
ENSDARG00000043102	74.1517	2.89678	0.624566	0.0399854	0.0823459
ENSDARG00000103994	563.173	2.19829	0.463148	0.040025	0.082382
ENSDARG00000100406	50.5081	2.81777	0.605695	0.0402544	0.0828085
ENSDARG00000078647	6.88364	4.00823	0.924339	0.0404617	0.0831891
ENSDARG00000075129	18.8621	3.32198	0.731	0.0405988	0.0834248
ENSDARG00000016404	48.2335	-2.83924	0.611214	0.0406442	0.0834723
ENSDARG00000029292	167.726	-1.82185	0.380694	0.0410088	0.0841748
ENSDARG00000099776	253.478	1.45656	0.302435	0.0414497	0.0850328
ENSDARG00000015502	38.1946	-3.42403	0.759041	0.0419773	0.0860207
ENSDARG00000102963	81.4402	-2.11545	0.445422	0.0419684	0.0860207
ENSDARG00000067912	45.6502	-2.9094	0.629038	0.0420474	0.0861171
ENSDARG00000008032	217.616	-1.46109	0.303713	0.0422602	0.0865054
ENSDARG00000021107	53.3825	2.75545	0.592338	0.0423025	0.0865446
ENSDARG00000009941	174.201	-1.72184	0.359674	0.0425506	0.0870044
ENSDARG00000003251	38.8563	-3.37554	0.74675	0.0426629	0.0871659
ENSDARG00000037178	40.2937	-3.79489	0.86266	0.0426763	0.0871659
ENSDARG00000035608	34.4631	2.34101	0.49658	0.0427899	0.0873502
ENSDARG00000011727	8.56372	3.70811	0.83776	0.0428189	0.0873615
ENSDARG00000069829	41.3417	-3.18879	0.698804	0.0433456	0.0883879
ENSDARG00000043970	22.4799	2.90261	0.628311	0.0437422	0.0891478
ENSDARG00000040854	66.7179	-2.34575	0.498189	0.0440573	0.089741
ENSDARG00000097048	9.2079	4.01584	0.931376	0.0441538	0.0898886
ENSDARG00000018397	27.6467	2.67636	0.574795	0.0443563	0.0902516
ENSDARG00000079148	91.5463	-2.19862	0.465295	0.0444775	0.0904488
ENSDARG00000078172	41.7355	-4.3546	1.04882	0.0447358	0.0909246
ENSDARG00000035023	20.1859	3.78685	0.862455	0.0448239	0.0910539
ENSDARG00000095623	11.4378	3.39657	0.754188	0.045404	0.0921822
ENSDARG00000006356	21.2305	3.66965	0.829373	0.0454672	0.0922604
ENSDARG00000101127	29.1521	3.46078	0.771847	0.0456486	0.092578
ENSDARG00000043646	82.7997	-1.99437	0.420417	0.0460539	0.0933492
ENSDARG00000045254	85.9244	2.7808	0.60079	0.0462371	0.0935681
ENSDARG00000087693	8.45297	4.11823	0.967053	0.0461916	0.0935681
ENSDARG00000099672	91.0712	-2.2471	0.477022	0.0462295	0.0935681
ENSDARG00000010008	106.621	2.63877	0.567131	0.0462755	0.093595
ENSDARG00000063916	58.8743	2.45241	0.523827	0.0463642	0.0937237
ENSDARG00000023151	239.735	2.45506	0.524481	0.0466819	0.094315
ENSDARG00000036162	676.659	-2.08734	0.441511	0.0468962	0.0946018
ENSDARG00000058733	27.2119	3.3066	0.732022	0.0468583	0.0946018
ENSDARG00000098130	9.93663	3.92758	0.906948	0.0469	0.0946018
ENSDARG00000012426	115.917	-1.93381	0.407547	0.0472032	0.0951619
ENSDARG00000045127	11.0784	3.9603	0.917433	0.0472468	0.0951985
ENSDARG00000041895	94.5856	1.52979	0.319914	0.047483	0.0956227
ENSDARG00000014915	29.2396	3.55251	0.798506	0.0478213	0.0962521
ENSDARG00000035678	36.2014	2.73089	0.589793	0.0480313	0.0966227
ENSDARG00000082716	21.3186	3.49097	0.78212	0.0480573	0.0966228
ENSDARG00000035899	8.11425	4.02574	0.939103	0.0489643	0.0983637
ENSDARG00000103739	305.245	-1.50376	0.314804	0.0489759	0.0983637
ENSDARG00000039872	5.91424	4.30095	1.03505	0.0491074	0.0985748
ENSDARG00000077715	39.3188	-3.65961	0.829866	0.0493083	0.0989249
ENSDARG00000038040	18.2255	3.99383	0.930254	0.0498697	0.0999973
ENSDARG00000101239	46.1737	-3.08068	0.676465	0.0500035	0.100008
ENSDARG00000056885	87.0686	-2.00166	0.423778	0.0500035	0.100008
ENSDARG00000011240	43.4161	3.21833	0.711971	0.0500035	0.100008
ENSDARG00000101526	5.77927	4.21644	1.00643	0.0500035	0.100008
ENSDARG00000018393	31.7019	2.87137	0.625301	0.0500035	0.100008
ENSDARG00000074790	25.9439	2.71373	0.587427	0.0500035	0.100008
ENSDARG00000017067	37.4717	2.79755	0.607603	0.0500035	0.100008
ENSDARG00000028957	33.8729	3.02336	0.662915	0.0500035	0.100008
ENSDARG00000101936	63.6617	2.217	0.472335	0.0500035	0.100008
ENSDARG00000011445	82.6798	-2.71646	0.588352	0.0500035	0.100008
ENSDARG00000074758	344.045	2.02063	0.428452	0.0500035	0.100008
ENSDARG00000052429	8.59152	3.89599	0.901941	0.0500035	0.100008
ENSDARG00000013938	34.6065	3.30096	0.734286	0.0500035	0.100008
ENSDARG00000057245	59.1511	-1.999	0.423828	0.0500035	0.100008
ENSDARG00000089458	141.234	-1.48943	0.312539	0.0500035	0.100008
ENSDARG00000042539	186.565	2.18349	0.465456	0.0500036	0.100008
ENSDARG00000042055	47.2818	-3.11263	0.686445	0.0500036	0.100008
ENSDARG00000073786	16.9769	3.66754	0.835464	0.0500036	0.100008
ENSDARG00000086098	15.0622	3.65956	0.833425	0.0500036	0.100008
ENSDARG00000069402	122.557	-1.72553	0.364059	0.0500036	0.100008
ENSDARG00000079307	144.853	2.29521	0.491182	0.0500036	0.100008
ENSDARG00000068701	69.9002	2.23174	0.476821	0.0500036	0.100008
ENSDARG00000002128	10.4211	3.39873	0.761836	0.0500036	0.100008
ENSDARG00000036894	43.0993	3.32212	0.741437	0.0500036	0.100008
ENSDARG00000075593	53.246	2.25059	0.481146	0.0500036	0.100008
ENSDARG00000069056	142.723	-1.82219	0.385572	0.0500036	0.100008
ENSDARG00000037425	30.2984	4.53467	1.14022	0.0500036	0.100008
ENSDARG00000017803	75.9876	2.3276	0.499142	0.0500036	0.100009
ENSDARG00000001889	367.885	3.02506	0.6658	0.0500036	0.100009
ENSDARG00000068655	5.64847	4.3797	1.07399	0.0500036	0.100009
ENSDARG00000104030	20.5358	3.32121	0.741955	0.0500036	0.100009
ENSDARG00000053254	2126.85	2.14821	0.458417	0.0500036	0.100009
ENSDARG00000089124	17.4964	4.32654	1.05321	0.0500036	0.100009
ENSDARG00000009881	55.9612	2.46814	0.531814	0.0500036	0.100009
ENSDARG00000104933	100.734	-1.87804	0.398229	0.0500036	0.100009
ENSDARG00000095947	13.7125	3.668	0.837935	0.0500036	0.100009
ENSDARG00000016239	95.4055	2.16746	0.463011	0.0500036	0.100009
ENSDARG00000078452	37.6323	-2.64252	0.573103	0.0500036	0.100009
ENSDARG00000009160	55.6345	-3.33098	0.745293	0.0500036	0.100009
ENSDARG00000077162	24.6421	3.16021	0.700949	0.0500037	0.100009
ENSDARG00000056590	6.39932	4.01815	0.946064	0.0500037	0.100009
ENSDARG00000071203	8.10882	3.71944	0.85418	0.0500037	0.100009
ENSDARG00000098320	48.5209	-3.72001	0.854559	0.0500037	0.100009
ENSDARG00000098497	39.2476	-3.51577	0.796808	0.0500037	0.100009
ENSDARG00000060469	43.2504	-3.03943	0.671381	0.0500037	0.100009
ENSDARG00000063559	9.92531	4.07358	0.966096	0.0500037	0.100009
ENSDARG00000043095	14.062	3.36498	0.756753	0.0500037	0.100009
ENSDARG00000074642	42.3816	-2.77272	0.606135	0.0500037	0.100009
ENSDARG00000079202	18.2659	2.50352	0.541965	0.0500037	0.100009
ENSDARG00000059816	18.6774	3.26284	0.729641	0.0500037	0.100009
ENSDARG00000013685	43.4222	3.69766	0.849881	0.0500037	0.100009
ENSDARG00000105273	15.3171	3.36337	0.756526	0.0500038	0.100009
ENSDARG00000052690	196.088	2.36301	0.509743	0.0500038	0.10001
ENSDARG00000039913	6.63363	4.12705	0.986921	0.0500038	0.10001
ENSDARG00000037954	98.1087	-2.11274	0.452635	0.0500038	0.10001
ENSDARG00000094198	44.2529	-2.84283	0.624132	0.0500038	0.10001
ENSDARG00000086753	6.08915	4.10158	0.979074	0.0500038	0.10001
ENSDARG00000099283	344.045	1.92595	0.411145	0.0500038	0.10001
ENSDARG00000002564	23.0208	2.97405	0.657565	0.0500038	0.10001
ENSDARG00000019236	15.9928	3.74635	0.867144	0.0500038	0.10001
ENSDARG00000057394	19.5313	2.5397	0.55215	0.0500039	0.10001
ENSDARG00000063197	91.716	1.84896	0.394331	0.0500039	0.10001
ENSDARG00000007697	2790.27	3.13623	0.699115	0.0500039	0.10001
ENSDARG00000076532	646.852	2.35903	0.510168	0.0500039	0.10001
ENSDARG00000010953	51.1107	2.58653	0.563625	0.0500039	0.10001
ENSDARG00000077405	194.388	1.92044	0.410482	0.0500039	0.10001
ENSDARG00000018524	325.6	1.84489	0.39371	0.0500039	0.10001
ENSDARG00000029600	7.47073	3.80108	0.885139	0.0500039	0.10001
ENSDARG00000103117	31.8772	2.51359	0.546891	0.0500039	0.10001
ENSDARG00000061131	131.915	-1.53636	0.326106	0.0500039	0.10001
ENSDARG00000036912	15.0603	3.14834	0.703554	0.0500039	0.10001
ENSDARG00000102773	106.75	-1.72602	0.367781	0.0500039	0.10001
ENSDARG00000035630	171.102	-1.78458	0.381128	0.050004	0.100011
ENSDARG00000093124	5.88044	4.21305	1.02526	0.050004	0.100011
ENSDARG00000020218	15.1868	2.80102	0.617102	0.050004	0.100011
ENSDARG00000026892	29.844	2.41946	0.525742	0.050004	0.100011
ENSDARG00000098724	88.3662	1.92242	0.412027	0.050004	0.100011
ENSDARG00000056214	8.29762	3.91998	0.92484	0.050004	0.100011
ENSDARG00000077533	50.0876	3.32958	0.753015	0.050004	0.100011
ENSDARG00000003607	14.605	3.32695	0.752403	0.050004	0.100011
ENSDARG00000033804	55.2533	2.05404	0.441991	0.050004	0.100011
ENSDARG00000080987	48.9945	-3.14724	0.705124	0.050004	0.100011
ENSDARG00000042410	19.0315	3.9337	0.93031	0.050004	0.100011
ENSDARG00000054793	20.0032	3.58637	0.824876	0.050004	0.100011
ENSDARG00000092159	13.0108	3.86357	0.908031	0.050004	0.100011
ENSDARG00000037488	663.603	2.26512	0.490521	0.050004	0.100011
ENSDARG00000004735	362.037	1.80482	0.386379	0.050004	0.100011
ENSDARG00000083179	72.3474	3.60154	0.830012	0.0500041	0.100011
ENSDARG00000014490	16.1848	3.28965	0.743589	0.0500041	0.100011
ENSDARG00000008674	47.3038	-3.61756	0.83512	0.0500041	0.100011
ENSDARG00000035958	75.7027	3.07952	0.688669	0.0500041	0.100011
ENSDARG00000006508	36.2995	-4.02677	0.962808	0.0500041	0.100011
ENSDARG00000007774	41.9679	-2.52582	0.552677	0.0500041	0.100012
ENSDARG00000093453	19.2902	2.78421	0.615166	0.0500041	0.100012
ENSDARG00000008808	25.6407	2.97213	0.662129	0.0500041	0.100012
ENSDARG00000023190	102.302	1.51573	0.323261	0.0500041	0.100012
ENSDARG00000058656	134.502	1.76278	0.377773	0.0500041	0.100012
ENSDARG00000002467	10.7915	3.44103	0.786271	0.0500041	0.100012
ENSDARG00000043864	63.052	2.86206	0.634603	0.0500041	0.100012
ENSDARG00000103824	54.6465	3.2547	0.735597	0.0500041	0.100012
ENSDARG00000015427	135.835	2.47829	0.541639	0.0500041	0.100012
ENSDARG00000092191	11.6438	3.96171	0.942854	0.0500041	0.100012
ENSDARG00000099743	6.37542	4.03425	0.967109	0.0500041	0.100012
ENSDARG00000100003	73.3009	2.3127	0.503063	0.0500042	0.100012
ENSDARG00000055607	50.4491	-2.65212	0.583656	0.0500042	0.100012
ENSDARG00000036057	6.86043	4.08073	0.984229	0.0500042	0.100012
ENSDARG00000104139	170.727	2.01424	0.434663	0.0500042	0.100012
ENSDARG00000039958	20.0737	3.02286	0.675994	0.0500042	0.100012
ENSDARG00000088428	33.9657	-4.15327	1.01037	0.0500042	0.100012
ENSDARG00000081252	13.7534	4.32471	1.07714	0.0500042	0.100012
ENSDARG00000002127	29.0191	2.45206	0.536245	0.0500042	0.100012
ENSDARG00000070314	203.767	-1.95287	0.421074	0.0500042	0.100012
ENSDARG00000009871	22.9833	2.57175	0.565015	0.0500042	0.100012
ENSDARG00000032614	119.96	2.50708	0.549547	0.0500042	0.100012
ENSDARG00000063230	8.61325	3.51957	0.810855	0.0500043	0.100012
ENSDARG00000044216	147.678	-1.80693	0.388758	0.0500043	0.100012
ENSDARG00000077291	12771.2	-1.34606	0.28733	0.0500043	0.100013
ENSDARG00000091298	243.071	2.21212	0.481239	0.0500043	0.100013
ENSDARG00000004049	49.1746	-3.46382	0.79628	0.0500043	0.100013
ENSDARG00000093207	25.5711	-3.86773	0.916961	0.0500043	0.100013
ENSDARG00000070480	10.8293	4.10674	0.99765	0.0500043	0.100013
ENSDARG00000102923	14.4057	3.17584	0.717924	0.0500043	0.100013
ENSDARG00000016573	126.565	-1.56678	0.335895	0.0500043	0.100013
ENSDARG00000026654	10.3906	3.69972	0.86563	0.0500043	0.100013
ENSDARG00000058419	140.822	1.88416	0.406776	0.0500043	0.100013
ENSDARG00000094043	19.1636	3.09704	0.697812	0.0500043	0.100013
ENSDARG00000045297	59.9764	2.59128	0.571329	0.0500044	0.100013
ENSDARG00000015853	31.6225	3.18917	0.722267	0.0500044	0.100013
ENSDARG00000077725	39.7406	-4.09088	0.993846	0.0500044	0.100013
ENSDARG00000058160	42.5494	-2.86095	0.638083	0.0500044	0.100013
ENSDARG00000053091	72.7522	2.39508	0.525116	0.0500044	0.100013
ENSDARG00000038901	6.18752	3.91529	0.934731	0.0500044	0.100013
ENSDARG00000079839	6.57676	3.69378	0.865417	0.0500044	0.100013
ENSDARG00000035505	8.66885	4.08044	0.991505	0.0500044	0.100013
ENSDARG00000077264	212.974	-1.39694	0.299272	0.0500044	0.100013
ENSDARG00000087205	77.6878	-2.28523	0.499706	0.0500044	0.100013
ENSDARG00000040505	15.5907	3.08135	0.695445	0.0500045	0.100013
ENSDARG00000014871	262.663	1.80028	0.388852	0.0500045	0.100014
ENSDARG00000071871	5.42467	4.16188	1.02222	0.0500045	0.100014
[truncated: 29,702 more rows]

## Sheet: CBE+olmesartan_CBE
gene	baseMean	log2FoldChange	lfcSE	pvalue	padj
ENSDARG00000014569	123.559	4.38601	0.374685	2.53916e-31	9.41012e-28
ENSDARG00000101849	303.815	2.9913	0.270392	4.19188e-27	7.76755e-24
ENSDARG00000025147	63.5737	5.78721	0.549838	2.0026e-26	2.47388e-23
ENSDARG00000021257	299.401	4.1349	0.388422	6.17575e-26	5.24696e-23
ENSDARG00000014690	806.075	4.57395	0.433898	8.14734e-26	5.24696e-23
ENSDARG00000017445	257.722	3.78866	0.354896	8.4948e-26	5.24696e-23
ENSDARG00000005926	186.312	4.51247	0.429881	1.46215e-25	7.74106e-23
ENSDARG00000025269	194.522	3.44178	0.326344	6.04385e-25	2.79981e-22
ENSDARG00000010553	94.1015	4.67781	0.459787	3.12288e-24	1.28593e-21
ENSDARG00000009447	207.39	5.21412	0.524215	1.35638e-23	5.02674e-21
ENSDARG00000042725	228.756	6.08312	0.624547	4.87616e-23	1.64282e-20
ENSDARG00000054823	41.3478	5.3139	0.550896	2.32062e-22	7.16685e-20
ENSDARG00000038076	102.99	4.75148	0.491163	4.05889e-22	1.15709e-19
ENSDARG00000052073	131.591	4.05277	0.414859	5.87271e-22	1.55459e-19
ENSDARG00000037402	70.2573	6.8237	0.726751	9.36873e-22	2.29782e-19
ENSDARG00000003599	1239.75	2.26894	0.227517	9.92043e-22	2.29782e-19
ENSDARG00000103846	445.439	3.97019	0.408885	1.22542e-21	2.6714e-19
ENSDARG00000070437	893.612	4.09196	0.425553	2.4372e-21	5.01793e-19
ENSDARG00000036028	97.862	4.039	0.427896	1.46373e-20	2.85504e-18
ENSDARG00000037783	444.13	4.62963	0.502026	3.71761e-20	6.88873e-18
ENSDARG00000020298	31.161	4.03561	0.432879	4.42891e-20	7.81598e-18
ENSDARG00000041619	578.84	4.39603	0.476904	5.94635e-20	1.00169e-17
ENSDARG00000037071	214.268	5.77215	0.645572	1.06114e-19	1.70983e-17
ENSDARG00000011841	279.165	5.17379	0.577433	1.71205e-19	2.64369e-17
ENSDARG00000045373	204.417	3.63126	0.392507	1.7914e-19	2.65557e-17
ENSDARG00000035054	79.2529	3.85548	0.422023	3.51914e-19	5.01613e-17
ENSDARG00000095556	95.1013	4.60138	0.512548	3.67858e-19	5.04919e-17
ENSDARG00000020850	1429.26	3.50711	0.382311	4.55e-19	5.84855e-17
ENSDARG00000059360	95.4575	4.20427	0.465304	4.57657e-19	5.84855e-17
ENSDARG00000031164	114.549	5.19003	0.588849	6.19183e-19	7.64898e-17
ENSDARG00000019230	858.683	4.47513	0.505938	1.52162e-18	1.81907e-16
ENSDARG00000103007	578.4	4.24912	0.478282	1.64795e-18	1.90853e-16
ENSDARG00000044093	1055.88	3.14478	0.347618	2.53426e-18	2.84605e-16
ENSDARG00000020893	69.8484	3.5878	0.402323	4.09475e-18	4.46328e-16
ENSDARG00000019205	116.85	2.60759	0.289445	7.02657e-18	7.44014e-16
ENSDARG00000025850	545.859	4.40753	0.509027	8.94464e-18	9.20801e-16
ENSDARG00000019008	110.085	4.04819	0.46424	1.0346e-17	1.03628e-15
ENSDARG00000105323	61.107	3.83671	0.439902	1.50923e-17	1.47189e-15
ENSDARG00000030957	53.3975	3.30182	0.376574	2.46145e-17	2.339e-15
ENSDARG00000070426	275.386	3.24983	0.37279	4.15229e-17	3.84709e-15
ENSDARG00000015862	179.549	4.55342	0.539647	4.57404e-17	4.13448e-15
ENSDARG00000098583	74.9507	4.56337	0.543901	6.73081e-17	5.93914e-15
ENSDARG00000005799	39.0052	6.27875	0.780112	1.3921e-16	1.18751e-14
ENSDARG00000023920	41.3335	3.83645	0.45328	1.40989e-16	1.18751e-14
ENSDARG00000070833	44.5168	5.30695	0.653908	2.03079e-16	1.67247e-14
ENSDARG00000034427	31.6947	4.24619	0.510195	2.15387e-16	1.73527e-14
ENSDARG00000053875	712.025	4.18258	0.502912	2.55578e-16	2.01526e-14
ENSDARG00000058206	58.6588	4.92983	0.606712	3.23353e-16	2.49656e-14
ENSDARG00000062469	1740.74	-2.72362	0.318841	3.84718e-16	2.90972e-14
ENSDARG00000032929	1151.91	3.67326	0.440157	5.14481e-16	3.81334e-14
ENSDARG00000011125	61.4246	3.94051	0.477539	6.94513e-16	5.04679e-14
ENSDARG00000070914	213.601	2.5208	0.297182	8.13938e-16	5.80087e-14
ENSDARG00000045487	209.204	4.59479	0.568914	8.57889e-16	5.99875e-14
ENSDARG00000098118	49.3497	3.52082	0.425988	1.30674e-15	8.96809e-14
ENSDARG00000041623	756.604	4.24723	0.527037	1.89919e-15	1.27971e-13
ENSDARG00000028336	46.1964	5.44915	0.698605	2.12584e-15	1.40685e-13
ENSDARG00000002344	275.912	2.89555	0.348323	2.19563e-15	1.42754e-13
ENSDARG00000093688	35.1708	4.19567	0.521997	2.48367e-15	1.58698e-13
ENSDARG00000052905	54.8409	4.72301	0.597549	2.73707e-15	1.71925e-13
ENSDARG00000030408	642.073	3.38274	0.413142	3.10325e-15	1.91678e-13
ENSDARG00000002369	113.563	3.46777	0.42498	3.40957e-15	2.07145e-13
ENSDARG00000094910	28.0819	5.60476	0.732632	5.68065e-15	3.39556e-13
ENSDARG00000026582	61.1457	4.3039	0.54752	8.34432e-15	4.90858e-13
ENSDARG00000088449	137.192	3.51041	0.436882	8.80206e-15	5.09694e-13
ENSDARG00000099269	51.8253	5.15493	0.679596	1.64575e-14	9.38328e-13
ENSDARG00000013968	294.924	2.80033	0.347988	2.22538e-14	1.24958e-12
ENSDARG00000058734	85.9986	3.10049	0.391631	4.28305e-14	2.3691e-12
ENSDARG00000007320	2393.24	2.48413	0.310478	4.69913e-14	2.56103e-12
ENSDARG00000094673	271.426	3.29283	0.419424	5.45864e-14	2.93184e-12
ENSDARG00000092610	27.3459	4.52272	0.602245	8.37945e-14	4.43632e-12
ENSDARG00000009868	73.8003	3.20029	0.410734	1.00131e-13	5.22657e-12
ENSDARG00000036329	224.446	3.78261	0.494239	1.12289e-13	5.77976e-12
ENSDARG00000097157	198.047	3.81677	0.499673	1.18353e-13	6.00843e-12
ENSDARG00000006260	284.335	4.08878	0.540285	1.22452e-13	6.13252e-12
ENSDARG00000063911	842.414	3.042	0.391841	1.56764e-13	7.74623e-12
ENSDARG00000051888	55.6536	3.93588	0.520476	1.70629e-13	8.32041e-12
ENSDARG00000055792	107.939	3.21029	0.417072	2.06477e-13	9.93596e-12
ENSDARG00000100825	184.017	3.60604	0.473658	2.09122e-13	9.93596e-12
ENSDARG00000095273	89.8196	4.12458	0.551223	2.1828e-13	1.02398e-11
ENSDARG00000068680	101.647	4.97728	0.685811	2.48893e-13	1.153e-11
ENSDARG00000003920	416.667	3.10864	0.405408	3.00469e-13	1.37474e-11
ENSDARG00000013475	166.332	2.95281	0.383839	3.0693e-13	1.38717e-11
ENSDARG00000074848	28.9681	3.7467	0.499681	3.92016e-13	1.75038e-11
ENSDARG00000040295	1021.56	2.63987	0.342544	4.07864e-13	1.79946e-11
ENSDARG00000039347	1259.04	2.79263	0.364084	4.49519e-13	1.9599e-11
ENSDARG00000090930	565.551	-3.01899	0.395743	4.61293e-13	1.98785e-11
ENSDARG00000014165	63.8659	3.8099	0.511353	5.00322e-13	2.13126e-11
ENSDARG00000094097	99.039	2.77923	0.363404	5.44315e-13	2.29231e-11
ENSDARG00000038075	177.858	3.17905	0.423568	9.43108e-13	3.92715e-11
ENSDARG00000036040	25.2607	3.48803	0.469446	1.02456e-12	4.21889e-11
ENSDARG00000009779	109.325	3.7806	0.514865	1.17814e-12	4.79801e-11
ENSDARG00000102632	255.796	2.71701	0.360043	1.28179e-12	5.10894e-11
ENSDARG00000007413	41.5228	4.01264	0.551721	1.28206e-12	5.10894e-11
ENSDARG00000081103	31.059	4.96061	0.707768	1.52135e-12	5.99802e-11
ENSDARG00000103364	136.96	3.75635	0.51413	1.61357e-12	6.29464e-11
ENSDARG00000101813	542.811	1.86643	0.245855	2.4387e-12	9.41441e-11
ENSDARG00000056167	94.5741	4.32237	0.610464	2.85962e-12	1.09255e-10
ENSDARG00000099424	283.355	-2.43769	0.326161	3.08919e-12	1.16822e-10
ENSDARG00000009018	147.268	4.00068	0.559563	3.21184e-12	1.20233e-10
ENSDARG00000020845	117.864	3.32073	0.454323	3.30002e-12	1.22299e-10
ENSDARG00000101413	95.5682	2.83505	0.383314	3.44426e-12	1.2638e-10
ENSDARG00000017843	107.805	3.35743	0.46117	3.85442e-12	1.40044e-10
ENSDARG00000063905	2321.99	2.61307	0.352406	3.93159e-12	1.41461e-10
ENSDARG00000086917	1108.54	5.09369	0.747753	4.83258e-12	1.72207e-10
ENSDARG00000030265	58.2281	3.6572	0.511451	5.98459e-12	2.11224e-10
ENSDARG00000018146	45.2541	4.12992	0.58774	6.04148e-12	2.11224e-10
ENSDARG00000102975	83.3599	4.02404	0.573798	8.14391e-12	2.82068e-10
ENSDARG00000013963	73.3463	3.50712	0.491059	8.25156e-12	2.83151e-10
ENSDARG00000032725	2533.72	2.00138	0.27021	8.47164e-12	2.88036e-10
ENSDARG00000035914	28.2825	3.44744	0.482139	8.58087e-12	2.89097e-10
ENSDARG00000044684	279.077	5.6492	0.854704	8.72905e-12	2.9144e-10
ENSDARG00000005791	939.672	2.41398	0.329613	9.80163e-12	3.24329e-10
ENSDARG00000027249	860.229	3.19567	0.444984	1.01699e-11	3.33536e-10
ENSDARG00000015355	260.889	3.57009	0.505196	1.27071e-11	4.13092e-10
ENSDARG00000041182	1092.19	2.29621	0.314666	1.36398e-11	4.39558e-10
ENSDARG00000038577	50.7563	4.00472	0.578129	1.54412e-11	4.93319e-10
ENSDARG00000035563	70.5091	3.12344	0.438025	1.63352e-11	5.17422e-10
ENSDARG00000069422	24.576	4.09619	0.595468	1.81303e-11	5.68029e-10
ENSDARG00000010246	72.2707	3.18846	0.449051	1.84569e-11	5.68029e-10
ENSDARG00000012387	106.535	3.35395	0.474831	1.86184e-11	5.68029e-10
ENSDARG00000011945	26.2506	3.64966	0.521888	1.86322e-11	5.68029e-10
ENSDARG00000068974	20.3856	4.43142	0.653436	1.86993e-11	5.68029e-10
ENSDARG00000038185	26.9893	5.04534	0.763475	2.04939e-11	6.17484e-10
ENSDARG00000000861	96.1165	1.96752	0.270098	2.1995e-11	6.57366e-10
ENSDARG00000039150	165.127	3.59904	0.517774	2.73886e-11	8.06034e-10
ENSDARG00000056085	23.49	4.32872	0.640905	2.74043e-11	8.06034e-10
ENSDARG00000020573	79.6342	2.40457	0.33588	3.3247e-11	9.70183e-10
ENSDARG00000039515	108.946	2.79761	0.395493	3.83518e-11	1.10193e-09
ENSDARG00000090552	25.2413	4.20434	0.623838	3.83564e-11	1.10193e-09
ENSDARG00000062933	65.9688	2.93283	0.416875	4.22679e-11	1.20496e-09
ENSDARG00000039268	51.3661	3.13939	0.449428	4.50482e-11	1.27442e-09
ENSDARG00000040286	24.4721	3.24927	0.467161	4.71533e-11	1.32386e-09
ENSDARG00000013087	23.5291	4.62327	0.7016	4.76963e-11	1.32904e-09
ENSDARG00000095897	56.6251	3.50151	0.509614	5.65712e-11	1.56457e-09
ENSDARG00000038290	26.9015	3.09651	0.44499	5.78722e-11	1.5887e-09
ENSDARG00000069817	576.476	5.2972	0.829517	5.92513e-11	1.6146e-09
ENSDARG00000035692	1382.76	2.29932	0.324519	6.39552e-11	1.73006e-09
ENSDARG00000059304	52.758	3.38902	0.493487	6.97989e-11	1.87445e-09
ENSDARG00000019702	531.486	3.19146	0.46268	7.70464e-11	2.0542e-09
ENSDARG00000057167	42.3091	2.92944	0.421513	7.77468e-11	2.05807e-09
ENSDARG00000063924	1926.22	2.79102	0.400332	7.98931e-11	2.09989e-09
ENSDARG00000037350	668.293	2.20958	0.312826	8.31016e-11	2.16883e-09
ENSDARG00000054271	55.4755	3.08462	0.447753	9.57719e-11	2.48203e-09
ENSDARG00000040738	14.4613	5.76709	0.929779	9.7444e-11	2.50783e-09
ENSDARG00000006691	642.892	2.96912	0.429797	9.86339e-11	2.52095e-09
ENSDARG00000016889	102.09	4.02324	0.606374	1.09468e-10	2.7787e-09
ENSDARG00000078109	51.5511	3.09102	0.450598	1.16322e-10	2.93258e-09
ENSDARG00000036140	295.725	3.15299	0.460926	1.21382e-10	3.03948e-09
ENSDARG00000078772	45.8975	2.93239	0.426136	1.25084e-10	3.09607e-09
ENSDARG00000091148	1782.29	3.70953	0.553536	1.25313e-10	3.09607e-09
ENSDARG00000013351	742.592	2.2273	0.318105	1.26414e-10	3.10257e-09
ENSDARG00000092870	82.577	3.43318	0.508011	1.37719e-10	3.35782e-09
ENSDARG00000060494	268.571	2.93449	0.428114	1.50355e-10	3.64194e-09
ENSDARG00000088383	63.8047	3.65229	0.546429	1.56295e-10	3.76122e-09
ENSDARG00000099776	253.478	1.98057	0.282699	1.64068e-10	3.92281e-09
ENSDARG00000081270	4766.73	-2.40166	0.348404	2.22255e-10	5.27997e-09
ENSDARG00000069113	786.71	-2.07138	0.298311	2.29057e-10	5.37909e-09
ENSDARG00000052840	19.042	5.45561	0.889845	2.2933e-10	5.37909e-09
ENSDARG00000007347	19.9136	3.6979	0.560195	2.5077e-10	5.845e-09
ENSDARG00000102741	72.3698	2.71243	0.397998	2.63562e-10	6.10476e-09
ENSDARG00000091801	73.9483	2.86741	0.424868	3.40302e-10	7.80661e-09
ENSDARG00000103277	219.229	3.14358	0.469789	3.41249e-10	7.80661e-09
ENSDARG00000103799	178.658	2.38557	0.349537	3.64771e-10	8.29351e-09
ENSDARG00000018637	225.803	2.61979	0.386288	3.71638e-10	8.39812e-09
ENSDARG00000093318	24.9476	6.52043	1.13167	4.05363e-10	9.1047e-09
ENSDARG00000086411	84.696	3.07092	0.459817	4.14188e-10	9.24688e-09
ENSDARG00000030106	86.9427	1.92449	0.279981	4.47656e-10	9.93422e-09
ENSDARG00000041332	16.4935	4.45854	0.711002	5.06558e-10	1.11744e-08
ENSDARG00000078942	261.904	-2.41766	0.357119	5.14003e-10	1.12716e-08
ENSDARG00000036875	3258.37	2.58071	0.383409	5.5301e-10	1.20556e-08
ENSDARG00000021864	3881.18	2.48422	0.3683	5.6339e-10	1.22101e-08
ENSDARG00000105465	33.777	3.0854	0.46659	6.31618e-10	1.36092e-08
ENSDARG00000030116	46.224	3.00852	0.454833	6.96333e-10	1.49168e-08
ENSDARG00000021582	14.0805	4.48009	0.72142	7.11206e-10	1.51479e-08
ENSDARG00000062116	37.6398	3.20268	0.487833	7.27843e-10	1.54136e-08
ENSDARG00000021107	53.3825	3.48698	0.539739	9.14813e-10	1.92631e-08
ENSDARG00000017294	580.67	-2.56186	0.385287	9.85828e-10	2.06411e-08
ENSDARG00000073874	114.067	4.9816	0.828973	9.91871e-10	2.0651e-08
ENSDARG00000027744	155.57	3.0204	0.460844	1.02478e-09	2.1217e-08
ENSDARG00000038074	21.7844	3.38252	0.523569	1.08895e-09	2.24203e-08
ENSDARG00000080152	197.882	3.85404	0.609047	1.1133e-09	2.27949e-08
ENSDARG00000013708	174.515	1.43321	0.209993	1.17789e-09	2.39731e-08
ENSDARG00000022303	74.4816	3.42915	0.532823	1.18378e-09	2.39731e-08
ENSDARG00000020232	55.1446	2.40822	0.362626	1.25125e-09	2.52018e-08
ENSDARG00000045399	88.6487	2.84152	0.433396	1.28982e-09	2.58383e-08
ENSDARG00000019778	1310.56	2.32846	0.35147	1.53238e-09	3.05323e-08
ENSDARG00000019404	55.8462	4.50892	0.743402	1.64205e-09	3.25424e-08
ENSDARG00000014867	1182.39	2.6007	0.396343	1.69132e-09	3.33406e-08
ENSDARG00000053058	90.8147	3.71811	0.590412	1.73574e-09	3.40352e-08
ENSDARG00000008292	99.4792	2.36942	0.35923	1.77624e-09	3.4646e-08
ENSDARG00000045877	74.4772	3.39886	0.533115	1.83823e-09	3.56675e-08
ENSDARG00000036080	60.3002	2.71698	0.416851	1.95771e-09	3.77879e-08
ENSDARG00000045490	20.628	4.1704	0.679113	1.96846e-09	3.77985e-08
ENSDARG00000035327	173.542	2.88726	0.44543	1.9839e-09	3.78986e-08
ENSDARG00000098635	46.2184	2.95818	0.458079	2.10848e-09	4.0072e-08
ENSDARG00000032997	13.6682	4.222	0.6921	2.28845e-09	4.32703e-08
ENSDARG00000104024	24.5793	2.99437	0.465421	2.34578e-09	4.41292e-08
ENSDARG00000067829	483.454	-2.51391	0.385417	2.43902e-09	4.56516e-08
ENSDARG00000014790	104.81	2.39781	0.366523	2.46064e-09	4.58249e-08
ENSDARG00000034777	40.7575	3.62113	0.578083	2.5523e-09	4.72942e-08
ENSDARG00000099833	56.3017	2.76482	0.427544	2.5782e-09	4.75364e-08
ENSDARG00000076693	1666.72	3.92277	0.635748	2.63402e-09	4.83251e-08
ENSDARG00000069846	23.0705	4.08648	0.669325	2.87726e-09	5.25277e-08
ENSDARG00000076978	15.2829	4.26545	0.705578	2.94158e-09	5.34388e-08
ENSDARG00000056903	12.4128	4.1877	0.690052	2.96406e-09	5.35844e-08
ENSDARG00000033845	361.914	-1.90691	0.28963	3.34013e-09	6.009e-08
ENSDARG00000013333	44.5961	3.63234	0.584691	3.45956e-09	6.19378e-08
ENSDARG00000014591	19.4903	3.94975	0.646174	3.57465e-09	6.36906e-08
ENSDARG00000098250	86.2752	3.83549	0.624028	3.59899e-09	6.38175e-08
ENSDARG00000057218	25.6478	3.78073	0.613798	3.67109e-09	6.4786e-08
ENSDARG00000017741	59.3194	3.24349	0.514758	3.80207e-09	6.67796e-08
ENSDARG00000020448	31.477	3.18544	0.505117	4.02053e-09	7.02385e-08
ENSDARG00000060350	59.2069	5.40208	0.956448	4.03691e-09	7.02385e-08
ENSDARG00000003127	13.7634	3.81002	0.621342	4.12487e-09	7.14335e-08
ENSDARG00000098273	267.235	-2.59642	0.404287	4.26781e-09	7.35652e-08
ENSDARG00000019417	98.4611	2.80884	0.440426	4.35087e-09	7.45999e-08
ENSDARG00000045367	38.1187	4.55536	0.773795	4.3681e-09	7.45999e-08
ENSDARG00000057676	22.7072	3.31521	0.529785	4.46469e-09	7.58998e-08
ENSDARG00000051783	1514.3	2.45762	0.381787	4.58155e-09	7.75307e-08
ENSDARG00000062338	292.469	-2.19516	0.338692	4.67708e-09	7.87875e-08
ENSDARG00000105321	15.7363	4.11566	0.687432	5.57549e-09	9.34967e-08
ENSDARG00000036298	721.772	2.66472	0.418641	5.6777e-09	9.47818e-08
ENSDARG00000036282	24.7955	3.01597	0.48048	6.23213e-09	1.03571e-07
ENSDARG00000041925	382.564	3.41601	0.554642	7.01884e-09	1.15747e-07
ENSDARG00000055901	11.9872	4.38139	0.747426	7.0273e-09	1.15747e-07
ENSDARG00000054916	16.1436	4.47532	0.767585	7.07086e-09	1.1595e-07
ENSDARG00000013623	2054.98	2.99309	0.478022	7.10953e-09	1.1607e-07
ENSDARG00000099195	14.6592	5.16087	0.919421	7.19688e-09	1.16981e-07
ENSDARG00000043509	484.481	2.51455	0.397125	8.47667e-09	1.37181e-07
ENSDARG00000069624	17.9886	4.24264	0.722239	8.529e-09	1.37428e-07
ENSDARG00000022438	54.5039	4.08573	0.690626	9.02026e-09	1.44715e-07
ENSDARG00000092115	84.9099	3.98822	0.670867	9.15818e-09	1.46193e-07
ENSDARG00000025566	245.48	2.07892	0.324854	9.19129e-09	1.46193e-07
ENSDARG00000056258	336.959	-2.15691	0.337976	9.39798e-09	1.48841e-07
ENSDARG00000094460	226.284	-2.58088	0.409604	9.53338e-09	1.50343e-07
ENSDARG00000057075	12.7117	4.14656	0.706015	1.03299e-08	1.62214e-07
ENSDARG00000003058	22.1927	4.04852	0.685918	1.05032e-08	1.6424e-07
ENSDARG00000038787	18.9549	5.13408	0.926513	1.11512e-08	1.7364e-07
ENSDARG00000091777	42.5487	3.19977	0.523021	1.28351e-08	1.99025e-07
ENSDARG00000068507	812.036	3.37692	0.556821	1.33934e-08	2.06817e-07
ENSDARG00000003820	53.1314	3.16606	0.517483	1.3493e-08	2.07489e-07
ENSDARG00000006588	69.4979	3.48426	0.577792	1.37718e-08	2.10903e-07
ENSDARG00000045465	85.8241	2.05464	0.324785	1.52498e-08	2.32575e-07
ENSDARG00000041895	94.5856	1.78169	0.279459	1.55339e-08	2.35937e-07
ENSDARG00000060489	55.3214	2.4953	0.400726	1.69687e-08	2.56678e-07
ENSDARG00000075331	209.369	1.47316	0.229439	1.72264e-08	2.59516e-07
ENSDARG00000063711	195.817	-2.50324	0.402426	1.7519e-08	2.628e-07
ENSDARG00000055524	20.2462	3.94518	0.674605	1.76085e-08	2.628e-07
ENSDARG00000092895	16.3464	3.91493	0.668365	1.76571e-08	2.628e-07
ENSDARG00000054864	1143.7	1.63359	0.255924	1.78931e-08	2.65247e-07
ENSDARG00000041811	715.254	2.45164	0.394027	1.84607e-08	2.72571e-07
ENSDARG00000056307	19.7105	4.27377	0.746032	1.86925e-08	2.74898e-07
ENSDARG00000014763	23.4694	3.00082	0.491646	1.8876e-08	2.76499e-07
ENSDARG00000045542	16.1746	4.02565	0.696209	2.21574e-08	3.23289e-07
ENSDARG00000100409	51.1233	3.01688	0.49679	2.23067e-08	3.24191e-07
ENSDARG00000020982	136.038	-3.0787	0.50868	2.30891e-08	3.34251e-07
ENSDARG00000036588	12.2102	3.65558	0.620434	2.3325e-08	3.36352e-07
ENSDARG00000105273	15.3171	3.83946	0.658543	2.38832e-08	3.43067e-07
ENSDARG00000098355	25.7252	3.54962	0.599774	2.41057e-08	3.44925e-07
ENSDARG00000012932	15.2604	4.6748	0.843263	2.46998e-08	3.52068e-07
ENSDARG00000079274	95.6575	3.91806	0.676677	2.59968e-08	3.69134e-07
ENSDARG00000103271	56.2228	2.57695	0.420002	2.72635e-08	3.85643e-07
ENSDARG00000091402	19.6811	2.82487	0.465257	2.93907e-08	4.14152e-07
ENSDARG00000067741	24.2247	3.48495	0.591074	3.08083e-08	4.32483e-07
ENSDARG00000006413	1085.04	2.63947	0.433153	3.27104e-08	4.57452e-07
ENSDARG00000069831	19.2217	4.16203	0.735344	3.42799e-08	4.77599e-07
ENSDARG00000052150	123.554	2.71815	0.449345	3.88931e-08	5.39842e-07
ENSDARG00000104458	95.3782	3.25118	0.550413	4.262e-08	5.89365e-07
ENSDARG00000058463	23.4737	3.75827	0.652968	4.28584e-08	5.90458e-07
ENSDARG00000091408	165.776	-2.64814	0.438046	4.35725e-08	5.98073e-07
ENSDARG00000008706	138.843	2.08905	0.339552	4.42932e-08	6.05722e-07
ENSDARG00000099079	100.739	2.1623	0.352984	4.79069e-08	6.52731e-07
ENSDARG00000053129	35.107	3.48144	0.59819	4.85099e-08	6.58526e-07
ENSDARG00000100664	176.775	-2.96098	0.497656	5.1083e-08	6.90925e-07
ENSDARG00000073742	173.644	4.62174	0.851932	5.19558e-08	7.00176e-07
ENSDARG00000042667	17.3624	3.7764	0.661519	5.42796e-08	7.28841e-07
ENSDARG00000095553	16.9154	4.24639	0.766183	5.62013e-08	7.51921e-07
ENSDARG00000078935	29.4195	2.80435	0.469897	5.68995e-08	7.57781e-07
ENSDARG00000089204	26.3921	4.44294	0.81218	5.70483e-08	7.57781e-07
ENSDARG00000045442	55.6117	3.46126	0.59712	5.75771e-08	7.61926e-07
ENSDARG00000063719	193.504	1.89125	0.307594	5.78883e-08	7.61926e-07
ENSDARG00000053684	398.808	2.14834	0.352307	5.79771e-08	7.61926e-07
ENSDARG00000093936	38.8689	3.71784	0.650576	5.84563e-08	7.65509e-07
ENSDARG00000030053	421.665	2.23163	0.367313	6.02755e-08	7.86552e-07
ENSDARG00000103415	70.1971	3.53204	0.613732	6.4795e-08	8.42556e-07
ENSDARG00000070447	36.491	2.62335	0.438314	6.50219e-08	8.42556e-07
ENSDARG00000058861	14.5863	3.79755	0.670092	6.60846e-08	8.53344e-07
ENSDARG00000076526	730.065	-1.83394	0.298916	6.76182e-08	8.70114e-07
ENSDARG00000031819	144.417	2.87613	0.485648	6.79708e-08	8.71625e-07
ENSDARG00000016393	37.9054	2.40299	0.399164	6.90395e-08	8.82277e-07
ENSDARG00000102142	755.752	-2.23145	0.368788	7.02831e-08	8.94959e-07
ENSDARG00000042864	18.56	3.31826	0.571807	7.05149e-08	8.94959e-07
ENSDARG00000104181	58.6649	3.66171	0.642831	7.20168e-08	9.10902e-07
ENSDARG00000101341	13.0311	3.86374	0.687658	7.67248e-08	9.66146e-07
ENSDARG00000018602	118.319	1.81111	0.295962	7.69058e-08	9.66146e-07
ENSDARG00000039914	271.021	3.04616	0.520337	7.98959e-08	1.00032e-06
ENSDARG00000017084	59.2131	2.76523	0.467125	8.02815e-08	1.00176e-06
ENSDARG00000074849	11.8934	4.12059	0.746373	8.07214e-08	1.00387e-06
ENSDARG00000102317	2507.87	1.98166	0.326112	8.11074e-08	1.0053e-06
ENSDARG00000041926	257.382	-2.29302	0.381353	8.2433e-08	1.01832e-06
ENSDARG00000004539	427.266	-2.45399	0.410678	8.52095e-08	1.04912e-06
ENSDARG00000099749	27.4276	2.92636	0.498949	8.915e-08	1.09308e-06
ENSDARG00000101936	63.6617	2.49746	0.419121	8.93691e-08	1.09308e-06
ENSDARG00000023220	110.89	3.23447	0.559232	9.04281e-08	1.10239e-06
ENSDARG00000027078	21.1207	3.14479	0.542922	9.90254e-08	1.20324e-06
ENSDARG00000009436	26.0875	3.76043	0.671032	1.01215e-07	1.22583e-06
ENSDARG00000009871	22.9833	2.81283	0.479325	1.02378e-07	1.23587e-06
ENSDARG00000001014	302.813	-1.62844	0.266505	1.0299e-07	1.23923e-06
ENSDARG00000023394	28.3732	3.24639	0.564123	1.05033e-07	1.25971e-06
ENSDARG00000032868	929.791	-1.57449	0.257646	1.09979e-07	1.31478e-06
ENSDARG00000099664	67.9931	3.03894	0.524902	1.18195e-07	1.40846e-06
ENSDARG00000057460	4095.04	3.33533	0.584467	1.19944e-07	1.42471e-06
ENSDARG00000042566	823.848	2.08957	0.349041	1.23872e-07	1.46667e-06
ENSDARG00000015128	3026.61	3.33998	0.586271	1.25791e-07	1.48465e-06
ENSDARG00000087301	117.332	3.17011	0.553466	1.38627e-07	1.63095e-06
ENSDARG00000039346	46.1269	2.99222	0.518481	1.41022e-07	1.65388e-06
ENSDARG00000055475	529.672	2.16078	0.36339	1.45396e-07	1.6998e-06
ENSDARG00000036335	17.805	3.79635	0.687221	1.47518e-07	1.71919e-06
ENSDARG00000100371	1586.39	2.00587	0.33597	1.51569e-07	1.76086e-06
ENSDARG00000011665	48.4807	3.13857	0.548958	1.5465e-07	1.79104e-06
ENSDARG00000086912	930.276	4.82729	0.940091	1.59976e-07	1.84694e-06
ENSDARG00000086735	902.082	-1.85826	0.310204	1.61182e-07	1.8551e-06
ENSDARG00000086618	29.8081	3.3416	0.592769	1.7637e-07	2.02361e-06
ENSDARG00000069360	28.4586	3.06314	0.536137	1.77551e-07	2.03088e-06
ENSDARG00000041022	66.2083	3.60546	0.649337	1.79368e-07	2.04534e-06
ENSDARG00000045929	49.3822	3.12906	0.549648	1.80708e-07	2.0543e-06
ENSDARG00000053862	145.666	4.793	0.937361	1.89942e-07	2.15224e-06
ENSDARG00000029479	8.86688	4.15233	0.776026	1.90484e-07	2.15224e-06
ENSDARG00000104839	77.836	2.40891	0.41196	1.94889e-07	2.19531e-06
ENSDARG00000034753	163.37	3.13008	0.551196	1.95667e-07	2.19739e-06
ENSDARG00000098608	14.0657	3.4114	0.609547	1.97225e-07	2.20821e-06
ENSDARG00000043453	1340.59	2.35794	0.402914	2.01625e-07	2.25067e-06
ENSDARG00000105648	11.8399	3.98831	0.741074	2.21956e-07	2.47017e-06
ENSDARG00000038608	14.6663	4.69801	0.920752	2.39642e-07	2.65902e-06
ENSDARG00000077847	17.0055	4.29493	0.817566	2.40862e-07	2.66458e-06
ENSDARG00000037790	69.5873	3.08533	0.546135	2.47891e-07	2.73418e-06
ENSDARG00000038239	41.0123	3.21995	0.575258	2.69737e-07	2.9663e-06
ENSDARG00000016788	367.107	-2.00215	0.341035	2.78566e-07	3.05433e-06
ENSDARG00000058159	23.4464	3.05356	0.541753	2.80056e-07	3.06162e-06
ENSDARG00000096632	34.8706	2.45818	0.425722	2.83188e-07	3.08675e-06
ENSDARG00000100275	54.8187	1.88072	0.319288	2.88216e-07	3.13234e-06
ENSDARG00000105822	30.3372	3.19312	0.571064	2.91025e-07	3.15362e-06
ENSDARG00000010946	233.215	2.16879	0.372156	2.94039e-07	3.17699e-06
ENSDARG00000013704	248.282	-1.84094	0.312955	3.17895e-07	3.42476e-06
ENSDARG00000104068	20.7377	4.27759	0.822333	3.25286e-07	3.49423e-06
ENSDARG00000039499	31.2177	3.16843	0.568101	3.28056e-07	3.51381e-06
ENSDARG00000071203	8.10882	4.3432	0.839339	3.2907e-07	3.51451e-06
ENSDARG00000035676	31.2019	2.43913	0.424446	3.40871e-07	3.63008e-06
ENSDARG00000063596	7.74341	4.61668	0.912209	3.43541e-07	3.64803e-06
ENSDARG00000052011	85.607	2.25602	0.390814	3.66381e-07	3.87946e-06
ENSDARG00000082131	17.4978	4.48997	0.882031	3.78486e-07	3.99621e-06
ENSDARG00000030236	41.9799	2.77639	0.491426	3.86373e-07	4.06789e-06
ENSDARG00000038306	115.574	1.8606	0.318382	3.90902e-07	4.10392e-06
ENSDARG00000053502	42.6388	3.34272	0.608411	3.92337e-07	4.10735e-06
ENSDARG00000103651	335.029	-2.73302	0.483389	4.00008e-07	4.17586e-06
ENSDARG00000036044	1767.84	2.81765	0.500639	4.1304e-07	4.29346e-06
ENSDARG00000091111	9.82501	4.73841	0.952306	4.1359e-07	4.29346e-06
ENSDARG00000006316	1772.48	1.83133	0.313695	4.20511e-07	4.34754e-06
ENSDARG00000011201	1624.17	1.72335	0.294049	4.21146e-07	4.34754e-06
ENSDARG00000010276	8.89914	5.34394	1.13243	4.31793e-07	4.44507e-06
ENSDARG00000041592	55.0035	3.1683	0.573271	4.3542e-07	4.46999e-06
ENSDARG00000103198	8.76011	3.96714	0.755923	4.69068e-07	4.80212e-06
ENSDARG00000010641	120.507	2.58032	0.455855	4.70897e-07	4.80756e-06
ENSDARG00000018840	24.0421	3.21003	0.584472	4.93514e-07	5.02462e-06
ENSDARG00000102887	30.854	3.66146	0.684941	5.0051e-07	5.08189e-06
ENSDARG00000015915	62.7385	2.93939	0.528988	5.21116e-07	5.27665e-06
ENSDARG00000033382	67.7349	2.70318	0.481682	5.29258e-07	5.34449e-06
ENSDARG00000021891	16.1116	3.37469	0.621974	5.41011e-07	5.44833e-06
ENSDARG00000054930	299.89	-2.76708	0.495037	5.5122e-07	5.5361e-06
ENSDARG00000083986	1199.77	-2.67729	0.477498	5.63784e-07	5.64699e-06
ENSDARG00000076223	90.2394	2.46602	0.436187	5.66353e-07	5.65742e-06
ENSDARG00000039578	90.9208	2.85176	0.513283	5.93164e-07	5.90931e-06
ENSDARG00000013307	2029.17	1.77808	0.307264	6.10618e-07	6.06689e-06
ENSDARG00000057772	20.0773	3.55037	0.665382	6.45908e-07	6.40037e-06
ENSDARG00000053840	41.9812	3.54298	0.664194	6.60101e-07	6.52356e-06
ENSDARG00000061149	8.9403	4.04833	0.786763	6.7959e-07	6.6983e-06
ENSDARG00000030125	29.9374	2.78069	0.501818	7.11338e-07	6.99262e-06
ENSDARG00000041295	7.43304	5.80647	1.34018	7.17199e-07	7.03159e-06
ENSDARG00000060330	40.6153	2.46043	0.439132	7.63005e-07	7.46094e-06
ENSDARG00000099014	19.0539	3.27499	0.608428	8.08336e-07	7.88341e-06
ENSDARG00000019732	52.2021	2.8638	0.521115	8.18077e-07	7.95746e-06
ENSDARG00000078134	67.0484	4.67072	0.962265	8.41251e-07	8.16145e-06
ENSDARG00000012513	25.3731	3.51119	0.662696	8.45975e-07	8.18586e-06
ENSDARG00000083699	22609.2	-2.06225	0.36391	8.63458e-07	8.33327e-06
ENSDARG00000029689	306.369	2.12841	0.376706	8.77513e-07	8.44286e-06
ENSDARG00000075952	30.0941	3.09803	0.571656	8.7937e-07	8.44286e-06
ENSDARG00000098466	18.6466	2.91549	0.533482	8.99803e-07	8.60002e-06
ENSDARG00000079639	233.58	-2.30143	0.410338	9.0038e-07	8.60002e-06
ENSDARG00000093374	398.254	-1.81764	0.318283	9.09194e-07	8.66189e-06
ENSDARG00000014717	335.757	-2.09577	0.370981	9.17768e-07	8.72115e-06
ENSDARG00000100075	327.529	-2.73588	0.497182	9.3857e-07	8.89602e-06
ENSDARG00000068708	77.5416	2.79947	0.510742	9.69977e-07	9.17025e-06
ENSDARG00000042133	51.366	2.96488	0.545575	9.90962e-07	9.34479e-06
ENSDARG00000015930	37.2183	2.2075	0.393564	1.00876e-06	9.4885e-06
ENSDARG00000010052	63.3498	2.03785	0.361063	1.01645e-06	9.5366e-06
ENSDARG00000012914	527.605	-1.56753	0.272855	1.02758e-06	9.61666e-06
ENSDARG00000097055	42.5235	2.02538	0.358923	1.03895e-06	9.69862e-06
ENSDARG00000092488	369.441	-2.23067	0.398502	1.04638e-06	9.74344e-06
ENSDARG00000077652	23.6974	3.13557	0.583622	1.06983e-06	9.93683e-06
ENSDARG00000100553	235.889	1.35998	0.235242	1.07934e-06	1.00001e-05
ENSDARG00000043371	88.4767	1.87718	0.33123	1.08643e-06	1.00406e-05
ENSDARG00000037647	27.2995	2.90984	0.53578	1.09442e-06	1.00894e-05
ENSDARG00000019339	10.1353	3.68625	0.711329	1.12837e-06	1.03765e-05
ENSDARG00000037203	39.0302	2.55019	0.462574	1.13295e-06	1.03928e-05
ENSDARG00000041878	26.9709	2.6498	0.483322	1.18024e-06	1.07999e-05
ENSDARG00000012076	36.3365	3.81959	0.745817	1.19766e-06	1.09175e-05
ENSDARG00000009783	10.8344	3.77045	0.733621	1.19898e-06	1.09175e-05
ENSDARG00000038574	132.165	1.58269	0.276957	1.20474e-06	1.09374e-05
ENSDARG00000076858	7.90317	4.33908	0.882957	1.20707e-06	1.09374e-05
ENSDARG00000030440	165.856	2.7176	0.49799	1.24073e-06	1.1215e-05
ENSDARG00000063068	770.375	-1.5708	0.275057	1.2507e-06	1.12776e-05
ENSDARG00000100594	11.2493	3.97816	0.787813	1.26506e-06	1.13794e-05
ENSDARG00000097351	38.2963	2.36292	0.42736	1.31207e-06	1.17737e-05
ENSDARG00000086658	528.998	3.95879	0.784272	1.32636e-06	1.18721e-05
ENSDARG00000003017	26.1006	3.31871	0.628995	1.32944e-06	1.18721e-05
ENSDARG00000034470	29.9285	3.62617	0.701184	1.33324e-06	1.18773e-05
ENSDARG00000023759	21.1826	3.81503	0.748131	1.35052e-06	1.20024e-05
ENSDARG00000045359	18.4007	2.93879	0.545923	1.3637e-06	1.20906e-05
ENSDARG00000074149	262.281	-2.14618	0.385718	1.40702e-06	1.24449e-05
ENSDARG00000012234	22.4994	2.84387	0.526523	1.41706e-06	1.25038e-05
ENSDARG00000090194	9.52866	3.82405	0.752292	1.44074e-06	1.26623e-05
ENSDARG00000101627	2735.95	-2.27584	0.411426	1.44185e-06	1.26623e-05
ENSDARG00000036626	137.087	-2.70381	0.497799	1.45671e-06	1.27625e-05
ENSDARG00000028581	46.0548	2.93002	0.545332	1.4605e-06	1.27656e-05
ENSDARG00000038559	726.108	1.85459	0.330118	1.4882e-06	1.29393e-05
ENSDARG00000090697	60.3636	2.93673	0.547148	1.49076e-06	1.29393e-05
ENSDARG00000045886	43.5275	2.50895	0.458379	1.49084e-06	1.29393e-05
ENSDARG00000021339	55.5966	3.56732	0.690617	1.53271e-06	1.32715e-05
ENSDARG00000024540	38.4954	3.97199	0.792956	1.56659e-06	1.35333e-05
ENSDARG00000053858	27.4207	3.1062	0.585316	1.59653e-06	1.37599e-05
ENSDARG00000097048	9.2079	4.4211	0.917151	1.60323e-06	1.37855e-05
ENSDARG00000104111	17.7028	3.30719	0.630694	1.60934e-06	1.3806e-05
ENSDARG00000019239	45.0465	2.20435	0.398887	1.6236e-06	1.38962e-05
ENSDARG00000038068	104.3	2.01448	0.362029	1.65432e-06	1.41265e-05
ENSDARG00000007795	162.955	1.97939	0.355533	1.69956e-06	1.44794e-05
ENSDARG00000035622	283.858	2.14393	0.387652	1.70764e-06	1.45149e-05
ENSDARG00000060029	17.0154	3.18862	0.605228	1.71794e-06	1.45691e-05
ENSDARG00000070472	43.3753	2.47912	0.454592	1.73194e-06	1.46543e-05
ENSDARG00000056549	39.9892	3.09548	0.584701	1.73809e-06	1.46728e-05
ENSDARG00000052680	11.8821	3.4745	0.672419	1.79534e-06	1.51217e-05
ENSDARG00000052789	22.3096	3.02983	0.571282	1.82919e-06	1.53718e-05
ENSDARG00000075677	8.10605	4.08595	0.828611	1.83558e-06	1.53906e-05
ENSDARG00000025581	986.224	1.81226	0.324324	1.86887e-06	1.56344e-05
ENSDARG00000053878	14.2981	3.02913	0.571919	1.90251e-06	1.588e-05
ENSDARG00000058984	26.5059	2.65006	0.492431	2.06136e-06	1.71672e-05
ENSDARG00000016830	58.1173	2.56629	0.47611	2.19761e-06	1.82374e-05
ENSDARG00000003693	65.3986	2.32031	0.42603	2.20256e-06	1.82374e-05
ENSDARG00000035282	19.6945	4.63602	0.99524	2.20463e-06	1.82374e-05
ENSDARG00000087765	123.995	4.03711	0.822369	2.24843e-06	1.85583e-05
ENSDARG00000029510	59.6006	2.41218	0.445067	2.27419e-06	1.8716e-05
ENSDARG00000103845	211.721	1.68106	0.301112	2.27763e-06	1.8716e-05
ENSDARG00000071060	85.6445	2.1804	0.398579	2.29122e-06	1.8786e-05
ENSDARG00000054890	72.866	2.1823	0.39903	2.30425e-06	1.88511e-05
ENSDARG00000015385	19.735	3.80702	0.7623	2.32375e-06	1.89687e-05
ENSDARG00000075021	27.9463	2.23277	0.409751	2.41945e-06	1.97066e-05
ENSDARG00000002235	425.167	-2.48071	0.460083	2.43185e-06	1.9749e-05
ENSDARG00000054696	68.4689	2.30503	0.424362	2.43533e-06	1.9749e-05
ENSDARG00000030411	1842.4	2.78919	0.525423	2.53491e-06	2.05118e-05
ENSDARG00000104537	166.678	2.98834	0.569123	2.58191e-06	2.08374e-05
ENSDARG00000012113	19.7697	3.29005	0.637801	2.5864e-06	2.08374e-05
ENSDARG00000005451	155.384	1.94519	0.353858	2.64547e-06	2.12671e-05
ENSDARG00000007180	43.5379	2.70558	0.508553	2.67205e-06	2.14342e-05
ENSDARG00000006008	201.412	-2.42015	0.449378	2.72045e-06	2.17754e-05
ENSDARG00000013856	107.429	2.89575	0.550746	2.85328e-06	2.27894e-05
ENSDARG00000041607	44.8076	3.0215	0.578927	2.90217e-06	2.313e-05
ENSDARG00000077776	66.2514	2.26915	0.41988	2.96645e-06	2.35915e-05
ENSDARG00000045355	10.5198	3.97017	0.813995	2.9895e-06	2.3724e-05
ENSDARG00000003216	35.4345	2.90118	0.553409	3.0737e-06	2.434e-05
ENSDARG00000058358	240.766	1.57384	0.28346	3.11857e-06	2.46427e-05
ENSDARG00000087164	1371.07	3.1064	0.599803	3.1378e-06	2.47419e-05
ENSDARG00000063230	8.61325	3.62411	0.724554	3.16223e-06	2.48816e-05
ENSDARG00000041417	132.276	2.23507	0.414104	3.21645e-06	2.52546e-05
ENSDARG00000012987	142.484	2.54523	0.478048	3.23881e-06	2.53764e-05
ENSDARG00000027828	338.145	-1.2984	0.231639	3.24895e-06	2.54021e-05
ENSDARG00000079305	38.1193	5.29158	1.25132	3.2904e-06	2.5672e-05
ENSDARG00000040822	15.3899	3.10479	0.600541	3.29777e-06	2.56755e-05
ENSDARG00000099375	16.7619	2.96285	0.568939	3.36982e-06	2.61609e-05
ENSDARG00000003631	371.74	-2.07914	0.383338	3.37424e-06	2.61609e-05
ENSDARG00000098654	205.153	-1.88557	0.345012	3.41461e-06	2.64187e-05
ENSDARG00000055589	46.9675	2.61909	0.494553	3.4246e-06	2.64408e-05
ENSDARG00000059234	13.352	3.45121	0.683819	3.45712e-06	2.66364e-05
ENSDARG00000075747	192.942	-2.16362	0.400699	3.4728e-06	2.67017e-05
ENSDARG00000010531	10.7906	3.00346	0.579405	3.59408e-06	2.75769e-05
ENSDARG00000042993	1619.4	2.75348	0.524696	3.69015e-06	2.82556e-05
ENSDARG00000101569	593.237	-1.31878	0.237018	4.01832e-06	3.0705e-05
ENSDARG00000044153	59.9454	2.1557	0.401547	4.16556e-06	3.17646e-05
ENSDARG00000013804	34.8141	2.77534	0.531901	4.19719e-06	3.194e-05
ENSDARG00000097528	50.0853	2.33943	0.439666	4.29377e-06	3.25807e-05
ENSDARG00000087324	377.453	3.14769	0.616527	4.29896e-06	3.25807e-05
ENSDARG00000054433	56.5926	2.17887	0.40701	4.39819e-06	3.32646e-05
ENSDARG00000011921	56.7131	1.94653	0.360386	4.5194e-06	3.41118e-05
ENSDARG00000023160	19.8726	2.92355	0.566311	4.53122e-06	3.41315e-05
ENSDARG00000077533	50.0876	3.41699	0.684121	4.77447e-06	3.58908e-05
ENSDARG00000037285	25.0236	3.4345	0.689251	4.90796e-06	3.68196e-05
ENSDARG00000099966	136.214	1.79286	0.330745	4.93573e-06	3.69532e-05
ENSDARG00000045017	8.35463	4.01671	0.845493	4.96492e-06	3.70968e-05
ENSDARG00000034187	174.971	2.15795	0.404554	5.01642e-06	3.74061e-05
ENSDARG00000015352	34.9253	1.95969	0.364563	5.12713e-06	3.81549e-05
ENSDARG00000017386	259.621	-2.26118	0.426463	5.24739e-06	3.89716e-05
ENSDARG00000071670	83.5277	2.63768	0.50655	5.36981e-06	3.98011e-05
ENSDARG00000015524	39.6258	2.6574	0.511381	5.53058e-06	4.09109e-05
ENSDARG00000074468	15.7022	3.1245	0.617103	5.54307e-06	4.09215e-05
ENSDARG00000104431	18.2507	3.06973	0.604392	5.57686e-06	4.10891e-05
ENSDARG00000056765	44.7799	2.85594	0.556049	5.74238e-06	4.22247e-05
ENSDARG00000098753	36.9535	2.35214	0.446931	5.78751e-06	4.24723e-05
ENSDARG00000080775	130.41	-2.66936	0.515258	5.91732e-06	4.33391e-05
ENSDARG00000094191	23.9744	2.84162	0.553832	6.02697e-06	4.40551e-05
ENSDARG00000029818	175.15	1.44641	0.264957	6.22603e-06	4.54206e-05
ENSDARG00000069826	494.043	3.80534	0.795034	6.36608e-06	4.63511e-05
ENSDARG00000069116	17.3856	3.5332	0.72204	6.38107e-06	4.63691e-05
ENSDARG00000011418	12.65	3.94206	0.834805	6.57478e-06	4.76832e-05
ENSDARG00000035400	705.83	2.26842	0.431522	6.64935e-06	4.81299e-05
ENSDARG00000060303	187.194	-2.31557	0.441934	6.87e-06	4.963e-05
ENSDARG00000103566	252.618	2.47593	0.477563	7.5043e-06	5.41069e-05
ENSDARG00000091771	69.857	2.56761	0.497592	7.56598e-06	5.44399e-05
ENSDARG00000033861	7.07882	4.17845	0.91101	7.57986e-06	5.44399e-05
ENSDARG00000098486	7.40975	4.0263	0.865407	7.65307e-06	5.48593e-05
ENSDARG00000101507	172.624	-2.54245	0.492815	7.86657e-06	5.62809e-05
ENSDARG00000059455	100.167	-3.09683	0.619223	7.93462e-06	5.66584e-05
ENSDARG00000020504	116.617	2.24479	0.429557	8.09172e-06	5.76691e-05
ENSDARG00000080562	140.001	-3.21796	0.649417	8.1926e-06	5.8276e-05
ENSDARG00000034734	22.6506	2.43215	0.469919	8.32346e-06	5.90934e-05
ENSDARG00000026829	45.4869	2.48089	0.480898	8.53788e-06	6.04997e-05
ENSDARG00000015392	23.126	3.09423	0.621137	8.792e-06	6.21816e-05
ENSDARG00000008573	14.1755	3.9977	0.862977	8.87356e-06	6.26389e-05
ENSDARG00000093448	31.995	2.87591	0.570269	9.0114e-06	6.34909e-05
ENSDARG00000103929	68.7271	2.04546	0.389476	9.0429e-06	6.3592e-05
ENSDARG00000069142	144.783	2.07078	0.394932	9.16629e-06	6.43376e-05
ENSDARG00000003054	163.075	-2.84799	0.564728	9.38836e-06	6.57717e-05
ENSDARG00000060081	201.252	-2.0049	0.381593	9.40631e-06	6.57732e-05
ENSDARG00000037425	30.2984	4.82175	1.14506	9.5863e-06	6.69055e-05
ENSDARG00000068484	13.5476	3.61085	0.755984	9.68498e-06	6.74672e-05
ENSDARG00000094561	22.7097	3.3992	0.700536	9.92452e-06	6.90061e-05
ENSDARG00000069038	86.382	-2.31373	0.447589	1.0022e-05	6.93938e-05
ENSDARG00000014675	21.6639	3.68988	0.77894	1.0029e-05	6.93938e-05
ENSDARG00000059400	12.9931	3.08037	0.621106	1.00395e-05	6.93938e-05
ENSDARG00000094300	19.6725	4.32852	0.972334	1.00552e-05	6.93938e-05
ENSDARG00000056744	288.008	2.76041	0.546492	1.0224e-05	7.04279e-05
ENSDARG00000042708	93.8357	2.1258	0.409029	1.09598e-05	7.52261e-05
ENSDARG00000007576	366.11	2.31409	0.449137	1.09612e-05	7.52261e-05
ENSDARG00000076001	159.922	-2.54699	0.500171	1.10906e-05	7.59739e-05
ENSDARG00000100392	4198.67	2.15608	0.415838	1.12634e-05	7.7015e-05
ENSDARG00000102191	129.65	1.69629	0.320483	1.13153e-05	7.72273e-05
ENSDARG00000039667	36.8452	2.52755	0.496404	1.1413e-05	7.77513e-05
ENSDARG00000036613	180.996	-2.97298	0.599111	1.1714e-05	7.96555e-05
ENSDARG00000000857	7.32106	4.45026	1.02272	1.19145e-05	8.08702e-05
ENSDARG00000056410	9.14092	3.68719	0.785026	1.21521e-05	8.2332e-05
ENSDARG00000016793	6569.25	2.63154	0.521176	1.23579e-05	8.35739e-05
ENSDARG00000007438	85.5668	2.06972	0.399082	1.24745e-05	8.42086e-05
ENSDARG00000057706	9.35514	4.24842	0.957444	1.25903e-05	8.46862e-05
ENSDARG00000003449	149.273	-2.05971	0.397103	1.2591e-05	8.46862e-05
ENSDARG00000062148	441.404	-2.19689	0.426744	1.30112e-05	8.73544e-05
ENSDARG00000099235	53.6092	1.86061	0.355974	1.30963e-05	8.77665e-05
ENSDARG00000069485	21.8182	2.94262	0.594665	1.31604e-05	8.7898e-05
ENSDARG00000062695	8.0073	3.76353	0.809804	1.31634e-05	8.7898e-05
ENSDARG00000016200	66.8638	3.38951	0.707628	1.36239e-05	9.07744e-05
ENSDARG00000043857	28.9855	2.04361	0.394853	1.36431e-05	9.07744e-05
ENSDARG00000052371	10.9431	4.02895	0.892515	1.41087e-05	9.37037e-05
ENSDARG00000020840	23.9774	3.19925	0.659699	1.4208e-05	9.41947e-05
ENSDARG00000103370	6.93556	3.60576	0.768113	1.43625e-05	9.49259e-05
ENSDARG00000102746	10.2136	3.02235	0.61607	1.43695e-05	9.49259e-05
ENSDARG00000058225	6.16536	4.16067	0.935541	1.44235e-05	9.51128e-05
ENSDARG00000058044	296.947	-1.91163	0.368133	1.47259e-05	9.69347e-05
ENSDARG00000051875	38.8267	2.70367	0.541341	1.48022e-05	9.72642e-05
ENSDARG00000044422	123.634	-2.58163	0.513869	1.50647e-05	9.88139e-05
ENSDARG00000059805	6.20177	4.49326	1.05254	1.52017e-05	9.93622e-05
ENSDARG00000097797	42.4052	2.9609	0.602569	1.52019e-05	9.93622e-05
ENSDARG00000103199	17.0023	3.91714	0.861432	1.52621e-05	9.958e-05
ENSDARG00000034105	304.836	-1.67361	0.3193	1.54078e-05	0.000100237
ENSDARG00000061862	782.576	-1.85747	0.357409	1.54297e-05	0.000100237
ENSDARG00000013729	42.8523	2.85133	0.576749	1.5444e-05	0.000100237
ENSDARG00000100003	73.3009	2.30325	0.452641	1.55398e-05	0.000100683
ENSDARG00000092112	43.2914	2.61554	0.522429	1.57243e-05	0.000101701
ENSDARG00000092364	7.2981	4.45801	1.04253	1.58951e-05	0.000102626
ENSDARG00000059510	5.11996	5.16089	1.34875	1.59812e-05	0.000103002
ENSDARG00000035043	10.7232	3.51586	0.74731	1.61918e-05	0.000104022
ENSDARG00000099351	207.43	2.66482	0.534314	1.61956e-05	0.000104022
ENSDARG00000103203	23.7804	3.19635	0.663369	1.66089e-05	0.000106492
ENSDARG00000013966	23.1875	2.49772	0.497725	1.7354e-05	0.000111078
ENSDARG00000103959	48.2901	1.79181	0.345284	1.74958e-05	0.00011174
ENSDARG00000040439	527.854	2.56586	0.513317	1.75179e-05	0.00011174
ENSDARG00000015955	6.25022	5.04597	1.29762	1.7608e-05	0.000112122
ENSDARG00000076667	60.5221	2.66443	0.53636	1.79117e-05	0.000113861
ENSDARG00000036625	45.0788	2.20535	0.433943	1.82017e-05	0.000115506
ENSDARG00000004470	34.7325	1.90305	0.36957	1.8767e-05	0.000118889
ENSDARG00000045944	42.4219	2.57647	0.517441	1.90539e-05	0.000120501
ENSDARG00000016238	45.3975	2.51387	0.503262	1.91169e-05	0.000120694
ENSDARG00000102407	13.9354	3.06237	0.633842	1.9424e-05	0.000122388
ENSDARG00000104945	302.011	2.72956	0.553324	1.94513e-05	0.000122388
ENSDARG00000040764	55.431	2.89479	0.593137	1.98308e-05	0.000124565
ENSDARG00000035860	5524.88	2.12263	0.417456	1.99491e-05	0.000125095
ENSDARG00000097746	34.9516	2.63527	0.532353	2.03624e-05	0.000127471
ENSDARG00000017844	52.3681	2.25176	0.446083	2.05048e-05	0.000128147
ENSDARG00000014554	12.9296	2.69865	0.547421	2.06597e-05	0.000128897
ENSDARG00000104814	15.1017	3.35594	0.712551	2.11374e-05	0.000131656
ENSDARG00000043402	13.126	3.07524	0.639703	2.1389e-05	0.000132999
ENSDARG00000024844	63.0939	2.75372	0.561242	2.14578e-05	0.000133203
ENSDARG00000098935	127.672	1.53247	0.293952	2.15329e-05	0.000133271
ENSDARG00000043635	13.3035	3.52087	0.758646	2.15406e-05	0.000133271
ENSDARG00000045847	23.6518	2.97692	0.615819	2.19535e-05	0.000135599
ENSDARG00000026183	25.0851	2.96625	0.613311	2.20631e-05	0.00013605
ENSDARG00000035890	26.8133	2.97608	0.61595	2.22382e-05	0.000136901
ENSDARG00000009488	93.856	-2.36619	0.473011	2.23722e-05	0.000137498
ENSDARG00000087017	11.1278	3.57014	0.774355	2.25806e-05	0.000138549
ENSDARG00000022509	9.57094	4.42772	1.05389	2.27477e-05	0.000139344
ENSDARG00000044573	30.405	2.43256	0.488333	2.28436e-05	0.000139543
ENSDARG00000086332	19.6037	2.86397	0.589179	2.28699e-05	0.000139543
ENSDARG00000058369	139.886	-2.29929	0.458506	2.28932e-05	0.000139543
ENSDARG00000073837	32.7236	2.3653	0.473401	2.30976e-05	0.000140558
ENSDARG00000079823	11.6536	3.39777	0.727325	2.34364e-05	0.000142386
ENSDARG00000020926	81.0807	1.71411	0.332883	2.39608e-05	0.000145333
ENSDARG00000100766	23.7979	2.58903	0.525787	2.47488e-05	0.000149868
ENSDARG00000056453	18.744	2.79011	0.573444	2.49385e-05	0.00015077
ENSDARG00000012688	456.292	1.94151	0.382086	2.55751e-05	0.000154367
ENSDARG00000060868	53.4833	2.32054	0.465334	2.57069e-05	0.00015491
ENSDARG00000079751	55.2947	1.97349	0.389123	2.5827e-05	0.000155381
ENSDARG00000019236	15.9928	3.40539	0.734724	2.73865e-05	0.000164496
ENSDARG00000079688	224.721	1.56811	0.304104	2.78719e-05	0.000167141
ENSDARG00000052429	8.59152	3.62983	0.800699	2.8528e-05	0.000170799
ENSDARG00000061352	103.544	-2.4678	0.501491	2.96195e-05	0.000176822
ENSDARG00000010420	42.068	2.74627	0.567003	2.96293e-05	0.000176822
ENSDARG00000017703	18.2092	2.85826	0.594351	2.97407e-05	0.000177201
ENSDARG00000055433	75.9397	1.75028	0.343535	3.04786e-05	0.000181306
ENSDARG00000005397	88.0148	1.87044	0.3694	3.07678e-05	0.000182733
ENSDARG00000032970	134.541	2.12213	0.424399	3.09352e-05	0.000183434
ENSDARG00000055360	81.0262	2.14632	0.429915	3.12342e-05	0.000184911
ENSDARG00000024548	852.134	2.58336	0.529594	3.14104e-05	0.000185657
ENSDARG00000023950	9.98443	3.2314	0.691992	3.16962e-05	0.000187048
ENSDARG00000007323	81.5093	1.82908	0.361152	3.22667e-05	0.000190112
ENSDARG00000054683	24.0713	2.73246	0.566076	3.27717e-05	0.0001926
ENSDARG00000077361	749.664	-1.26265	0.242974	3.2793e-05	0.0001926
ENSDARG00000033175	36.5286	2.72925	0.565512	3.30636e-05	0.000193883
ENSDARG00000035598	15.996	2.32456	0.471311	3.37837e-05	0.000197792
ENSDARG00000036168	151.541	-2.4841	0.508232	3.42352e-05	0.00020012
ENSDARG00000103634	28.7274	2.53728	0.520929	3.4693e-05	0.000202476
ENSDARG00000002593	60.8277	3.08141	0.655779	3.55518e-05	0.000206837
ENSDARG00000003205	7.0884	3.47149	0.762807	3.55519e-05	0.000206837
ENSDARG00000099439	47.5069	2.21384	0.447329	3.57711e-05	0.000207786
ENSDARG00000076170	68.3324	1.87289	0.372091	3.58668e-05	0.000208016
ENSDARG00000036855	37.0814	2.15088	0.433374	3.60878e-05	0.000208971
ENSDARG00000054539	26.1402	2.69342	0.559147	3.63999e-05	0.000210449
ENSDARG00000097897	208.421	1.7039	0.336087	3.69272e-05	0.000213166
ENSDARG00000090428	648.606	2.59615	0.537024	3.83213e-05	0.000220869
ENSDARG00000074340	178.237	1.83525	0.364931	3.85243e-05	0.000221694
ENSDARG00000074001	315.665	2.67547	0.556361	3.88586e-05	0.000223271
ENSDARG00000023298	3525.3	2.17231	0.439526	3.90227e-05	0.000223867
ENSDARG00000044251	59.9728	1.89458	0.378088	3.91911e-05	0.000224486
ENSDARG00000004034	46.747	2.57187	0.532025	3.96666e-05	0.000226859
ENSDARG00000102645	316.89	-2.50895	0.517402	4.01221e-05	0.00022911
ENSDARG00000051886	691.295	1.45338	0.284267	4.07012e-05	0.000232059
ENSDARG00000009484	30.7032	2.3201	0.473887	4.07982e-05	0.000232255
ENSDARG00000040799	10.2075	3.93259	0.912606	4.10729e-05	0.000233461
ENSDARG00000104287	8.70019	3.85143	0.886603	4.18552e-05	0.000237543
ENSDARG00000013044	12.8805	3.92092	0.909881	4.20458e-05	0.00023826
ENSDARG00000040407	65.5758	1.48684	0.291791	4.2699e-05	0.000241592
ENSDARG00000099766	43.6536	2.38666	0.490486	4.34523e-05	0.000245479
ENSDARG00000022895	7.51819	3.85138	0.88891	4.38974e-05	0.000247616
ENSDARG00000052336	8.1786	3.93542	0.917619	4.44408e-05	0.000250301
ENSDARG00000019881	475.234	1.71145	0.340121	4.45669e-05	0.00025063
ENSDARG00000003308	78.0044	2.08925	0.423527	4.55348e-05	0.000255685
ENSDARG00000000853	69.6126	1.90805	0.383842	4.73323e-05	0.000265376
ENSDARG00000009881	55.9612	2.24458	0.459442	4.74228e-05	0.000265482
ENSDARG00000104149	14.1754	2.94942	0.630304	4.81506e-05	0.00026915
ENSDARG00000033012	309.107	-1.40134	0.275176	4.83082e-05	0.000269624
ENSDARG00000075261	36.3271	2.68227	0.563528	4.88795e-05	0.000272402
ENSDARG00000041232	2212.54	2.07819	0.422595	4.99141e-05	0.00027775
ENSDARG00000021443	17.4507	3.13867	0.682025	5.07955e-05	0.000282231
ENSDARG00000028027	47.291	2.06231	0.41939	5.10144e-05	0.000283023
ENSDARG00000038000	8.43446	3.81181	0.883592	5.13964e-05	0.000284716
ENSDARG00000055395	7.7651	3.40151	0.756491	5.16116e-05	0.000285482
ENSDARG00000045768	108.097	1.71382	0.342648	5.19543e-05	0.000286818
ENSDARG00000002564	23.0208	2.58379	0.541049	5.2008e-05	0.000286818
ENSDARG00000054063	25.7375	3.07557	0.667775	5.54599e-05	0.0003054
ENSDARG00000017775	126.475	3.00297	0.64884	5.6216e-05	0.000309105
ENSDARG00000019644	673.294	1.87695	0.379709	5.6811e-05	0.000311914
ENSDARG00000070083	1250.55	2.36632	0.491246	5.69104e-05	0.000311997
ENSDARG00000071468	19.0091	3.11709	0.680647	5.83761e-05	0.000319559
ENSDARG00000100431	12.5714	3.3668	0.751457	5.90558e-05	0.000322803
ENSDARG00000021811	308.151	1.61505	0.322943	5.92743e-05	0.00032352
ENSDARG00000009505	312.371	1.81156	0.36592	5.94799e-05	0.000324165
ENSDARG00000053370	122.845	2.23313	0.461582	6.10235e-05	0.00033209
ENSDARG00000104538	20.5485	2.56839	0.541194	6.13918e-05	0.000333328
ENSDARG00000101334	6.65814	3.27174	0.725489	6.14309e-05	0.000333328
ENSDARG00000007405	27.0319	2.26515	0.469189	6.15815e-05	0.000333656
ENSDARG00000003008	54.6112	1.9465	0.396555	6.19292e-05	0.000335051
ENSDARG00000019362	13.2821	2.48857	0.522246	6.23432e-05	0.000336799
ENSDARG00000055523	6.39484	4.86527	1.35378	6.26282e-05	0.000337846
ENSDARG00000039684	12.4141	3.00661	0.653503	6.34868e-05	0.00034198
ENSDARG00000068088	29.7399	3.28246	0.729838	6.36591e-05	0.00034241
ENSDARG00000077664	9.56291	3.12132	0.684859	6.40943e-05	0.000344251
ENSDARG00000043856	129.327	2.26581	0.470518	6.53719e-05	0.000350605
ENSDARG00000045025	7.75066	3.1696	0.699257	6.61045e-05	0.000354022
ENSDARG00000056141	52.4197	2.43392	0.510509	6.62959e-05	0.000354535
ENSDARG00000068992	1228.38	1.7409	0.35207	6.72044e-05	0.000358875
ENSDARG00000020693	292.803	2.15311	0.444986	6.7466e-05	0.000359266
ENSDARG00000103682	85.4094	2.06256	0.424228	6.74714e-05	0.000359266
ENSDARG00000021195	135.421	-1.87913	0.38288	6.77788e-05	0.000360332
ENSDARG00000016864	19.5245	2.6106	0.553939	6.7866e-05	0.000360332
ENSDARG00000020759	279.134	-2.14335	0.442936	6.81996e-05	0.000361585
ENSDARG00000007682	63.943	2.06041	0.424044	6.86639e-05	0.000363526
ENSDARG00000019444	36.9492	2.33927	0.48889	6.90904e-05	0.000365262
ENSDARG00000006207	11.5181	3.65798	0.847559	6.92166e-05	0.000365409
ENSDARG00000021702	11.0221	3.57866	0.822342	6.94081e-05	0.000365898
ENSDARG00000018903	196.954	1.84292	0.37521	6.96743e-05	0.00036678
ENSDARG00000076542	206.091	-1.93174	0.395142	6.97754e-05	0.000366791
ENSDARG00000019326	29.8324	2.44302	0.513865	6.9922e-05	0.000367041
ENSDARG00000008859	1518.52	-1.66202	0.335326	7.01496e-05	0.000367715
ENSDARG00000042845	7.30585	3.72396	0.871053	7.19747e-05	0.000376749
ENSDARG00000010021	56.3327	2.03488	0.419199	7.2674e-05	0.000379873
ENSDARG00000005230	168.172	2.21418	0.460792	7.36112e-05	0.00038423
ENSDARG00000070787	27.1874	2.02956	0.418233	7.37301e-05	0.000384309
ENSDARG00000007955	54.9446	2.16673	0.449816	7.38406e-05	0.000384344
ENSDARG00000002745	69.3681	2.78894	0.601263	7.46305e-05	0.000387657
ENSDARG00000090352	37.2441	2.46537	0.520731	7.46861e-05	0.000387657
ENSDARG00000103163	12.1872	2.86432	0.621215	7.57742e-05	0.000392754
ENSDARG00000036593	417.252	-1.2672	0.251603	7.59379e-05	0.000393053
ENSDARG00000042977	47.8855	2.0797	0.43104	7.94232e-05	0.000410519
ENSDARG00000091124	12.3457	2.9683	0.650262	7.96927e-05	0.000411339
ENSDARG00000095421	412.17	-1.4849	0.298446	7.99511e-05	0.000412098
ENSDARG00000078619	20.6597	2.6829	0.57619	8.01809e-05	0.000412709
ENSDARG00000059406	6.85539	3.71804	0.874729	8.06492e-05	0.000414544
ENSDARG00000062765	783.745	-1.30871	0.261038	8.1574e-05	0.000418716
ENSDARG00000101869	231.245	-1.85969	0.381521	8.23229e-05	0.000421976
ENSDARG00000023724	209.086	-2.11905	0.4409	8.28206e-05	0.000423574
ENSDARG00000044267	73.1154	1.85221	0.379938	8.28633e-05	0.000423574
ENSDARG00000022213	15.409	2.50675	0.533428	8.36272e-05	0.000426891
ENSDARG00000068562	374.055	-1.45497	0.292711	8.51074e-05	0.000433849
ENSDARG00000068641	9.4849	3.64059	0.852101	8.5856e-05	0.000437064
ENSDARG00000018562	34.2923	1.70274	0.347079	8.60814e-05	0.00043761
ENSDARG00000040674	9.57748	2.99424	0.659956	8.67962e-05	0.000440639
ENSDARG00000005774	134.597	1.93896	0.400464	8.75267e-05	0.00044374
ENSDARG00000007791	44.7453	2.31953	0.4894	8.85182e-05	0.000448154
ENSDARG00000057913	256.707	1.79941	0.369163	8.90783e-05	0.000450374
ENSDARG00000042620	36.3294	2.36479	0.500462	8.93766e-05	0.000451267
ENSDARG00000016904	27.28	2.5327	0.54178	9.07686e-05	0.000457671
ENSDARG00000016391	25.5752	2.35377	0.498628	9.27969e-05	0.000467263
ENSDARG00000063899	738.151	2.25841	0.475948	9.33527e-05	0.000469128
ENSDARG00000012395	6.69141	4.64109	1.27135	9.34205e-05	0.000469128
ENSDARG00000076790	1508.8	2.76452	0.601748	9.52484e-05	0.00047766
ENSDARG00000007531	24.6823	2.06157	0.430226	9.57909e-05	0.000479731
ENSDARG00000012369	10.3771	3.05897	0.68107	9.59979e-05	0.000480119
ENSDARG00000100965	194.769	1.2123	0.242404	9.69243e-05	0.000484099
ENSDARG00000006758	97.2863	1.83467	0.378586	9.80385e-05	0.000489005
ENSDARG00000060372	95.928	-2.63119	0.568425	9.82759e-05	0.00048953
ENSDARG00000007247	39.7021	3.08108	0.688205	9.87275e-05	0.00049112
ENSDARG00000025332	99.3117	1.83348	0.378579	9.97035e-05	0.00049531
ENSDARG00000008735	112.254	2.97642	0.660669	0.000103251	0.000512247
ENSDARG00000013979	58.8497	2.29345	0.486473	0.000103486	0.000512727
ENSDARG00000101458	127.606	1.81525	0.37532	0.000105488	0.000521946
ENSDARG00000003779	427.032	-1.70183	0.349824	0.000106082	0.000524186
ENSDARG00000054201	259.038	-1.17231	0.234961	0.000107419	0.000530086
ENSDARG00000103158	137.002	-1.75935	0.363383	0.000110608	0.000545098
ENSDARG00000075831	138.494	1.94996	0.407576	0.000114872	0.000565358
ENSDARG00000061235	20.1851	2.2461	0.477367	0.000115187	0.000566159
ENSDARG00000058354	24.3219	2.64889	0.577271	0.000115752	0.000568183
ENSDARG00000068265	47.5037	2.33589	0.499225	0.000116086	0.000569069
ENSDARG00000054818	1123.26	2.11551	0.446641	0.000117267	0.000574097
ENSDARG00000021343	27.8582	2.39599	0.514176	0.00011744	0.000574184
ENSDARG00000099805	50.5667	2.10408	0.444532	0.000120914	0.000590392
ENSDARG00000007480	109.156	2.24518	0.478563	0.000123212	0.000600819
ENSDARG00000010625	10.0915	4.26304	1.1126	0.000125195	0.000609689
ENSDARG00000070617	7.18408	3.80051	0.927578	0.000126218	0.000613339
ENSDARG00000037998	37.229	1.94032	0.406977	0.000126276	0.000613339
ENSDARG00000089681	14.8685	2.95011	0.660271	0.000127351	0.000617754
ENSDARG00000006760	148.237	-1.61821	0.333844	0.000129207	0.000625938
ENSDARG00000013505	67.3152	1.53182	0.314633	0.000129721	0.000627608
ENSDARG00000078352	8.82226	2.9886	0.671684	0.000130086	0.000628511
ENSDARG00000099970	18080.3	1.96684	0.413691	0.000130247	0.000628511
ENSDARG00000079264	44.2171	2.03471	0.429875	0.000132284	0.000637511
ENSDARG00000020043	39.4317	2.60685	0.571126	0.000137651	0.000662192
ENSDARG00000016903	41.3108	2.1718	0.463241	0.000137763	0.000662192
ENSDARG00000075593	53.246	1.94703	0.410168	0.000138624	0.000665258
ENSDARG00000036376	6.00972	3.58886	0.858538	0.00013876	0.000665258
ENSDARG00000104835	90.8562	-2.13983	0.455935	0.0001402	0.000670453
ENSDARG00000043388	6.15583	4.4466	1.21221	0.000140205	0.000670453
ENSDARG00000022165	31.9086	2.69537	0.59481	0.000141041	0.00067358
ENSDARG00000086985	73.1681	-1.82295	0.381724	0.000141414	0.000674492
ENSDARG00000002790	47.1624	2.64077	0.58108	0.000143746	0.000684731
ENSDARG00000086753	6.08915	3.72474	0.908731	0.000146357	0.000696086
ENSDARG00000043128	32.7832	2.61812	0.575727	0.000146505	0.000696086
ENSDARG00000031587	5.94198	4.44427	1.21632	0.000147216	0.000698571
ENSDARG00000043173	6.94779	4.0612	1.0389	0.000148015	0.000701463
ENSDARG00000005108	8.62052	3.13881	0.720305	0.000151544	0.000717272
ENSDARG00000105562	9.51558	4.07291	1.04572	0.000151924	0.000718152
ENSDARG00000041078	26.5546	2.53119	0.554592	0.000153415	0.000724277
ENSDARG00000087950	308.669	1.48588	0.306654	0.000154502	0.00072848
ENSDARG00000061794	40.2092	2.36103	0.512184	0.000156235	0.000735137
ENSDARG00000013443	19.8125	3.71506	0.908985	0.000156311	0.000735137
ENSDARG00000039682	10.8925	3.28497	0.765952	0.000157238	0.000738562
ENSDARG00000099411	5.63292	4.66471	1.36097	0.000157671	0.000739657
ENSDARG00000070780	10.256	3.19885	0.740014	0.000158696	0.000743523
ENSDARG00000102367	51.6647	1.83181	0.385876	0.000160816	0.000752505
ENSDARG00000077256	295.357	1.3194	0.270584	0.000162496	0.000759409
ENSDARG00000015653	180.64	1.32815	0.272631	0.000164531	0.00076795
ENSDARG00000043757	25.7401	2.57373	0.567597	0.000165828	0.000773031
ENSDARG00000087193	3.74105	4.67738	1.38271	0.000168701	0.000785437
ENSDARG00000058746	20.8722	2.47663	0.543231	0.000169387	0.000787639
ENSDARG00000070651	27.2552	2.14956	0.462655	0.000173719	0.000806768
ENSDARG00000087452	88.0719	1.89673	0.402582	0.000176053	0.000816584
ENSDARG00000094557	222.586	2.52242	0.556009	0.000176424	0.000817282
ENSDARG00000099214	54.7027	3.12343	0.721889	0.000177834	0.000822787
ENSDARG00000020218	15.1868	2.28738	0.497122	0.000179453	0.000829243
ENSDARG00000013207	377.238	-1.63726	0.342831	0.000179968	0.000830587
ENSDARG00000005738	74.7008	1.7938	0.379139	0.000182697	0.000842132
ENSDARG00000100222	490.859	-1.61068	0.337249	0.000186085	0.000856683
ENSDARG00000036164	70.0429	1.57757	0.329846	0.000187793	0.000863473
ENSDARG00000104701	350.209	-1.5472	0.323032	0.000188755	0.00086576
ENSDARG00000015790	17.627	2.74953	0.617889	0.000188757	0.00086576
ENSDARG00000096797	11.1705	2.66045	0.594034	0.000189121	0.000866356
ENSDARG00000102558	95.4495	2.54792	0.564524	0.000189549	0.000867245
ENSDARG00000077353	371.652	-1.26732	0.261379	0.000198195	0.000905459
ENSDARG00000087226	152.679	-2.1335	0.46152	0.00019839	0.000905459
ENSDARG00000035870	66.6377	1.76005	0.373072	0.000203983	0.000929841
ENSDARG00000038429	96.3688	-1.72098	0.364159	0.000206237	0.000938963
ENSDARG00000091001	83.908	2.50158	0.554844	0.000206788	0.000940314
ENSDARG00000060445	3.48912	4.62294	1.37807	0.000207475	0.000942283
ENSDARG00000099380	1782.04	1.67038	0.352618	0.00020854	0.000945959
ENSDARG00000100354	26.6561	2.24101	0.489221	0.000210228	0.000952451
ENSDARG00000058522	233.264	-1.70787	0.361574	0.000212322	0.000960762
ENSDARG00000092693	1032.28	2.18409	0.47546	0.000213267	0.000963864
ENSDARG00000014956	7.73005	3.04834	0.706873	0.000214963	0.000969241
ENSDARG00000089362	4.71676	4.13375	1.10059	0.00021498	0.000969241
ENSDARG00000015575	22.5399	2.21938	0.484551	0.00021683	0.000976393
ENSDARG00000035326	8.12523	3.79746	0.960791	0.000220645	0.000992366
ENSDARG00000099476	5.90624	3.64825	0.905077	0.000222517	0.000999573
ENSDARG00000095623	11.4378	2.68878	0.606993	0.000226405	0.00101581
ENSDARG00000074508	66.9947	2.07937	0.451132	0.000227134	0.00101785
ENSDARG00000059654	140.609	1.34786	0.280911	0.000232018	0.001038
ENSDARG00000068179	75.6176	2.48981	0.554892	0.000232193	0.001038
ENSDARG00000056379	9.16296	3.34015	0.801843	0.000237146	0.00105887
ENSDARG00000082960	123.456	-2.91139	0.671304	0.000242198	0.00108013
ENSDARG00000074955	112.518	1.59831	0.33844	0.00024585	0.00109509
ENSDARG00000044954	205.623	-2.35511	0.521971	0.000249008	0.00110783
ENSDARG00000095459	11.8501	2.60183	0.586747	0.000251792	0.00111888
ENSDARG00000054578	543.971	1.69724	0.361861	0.000253057	0.00112315
ENSDARG00000098674	146.874	-2.19017	0.480826	0.000253843	0.00112529
ENSDARG00000059368	64.9971	-2.24379	0.494302	0.0002545	0.00112685
ENSDARG00000020679	15.3661	2.75125	0.627909	0.000255553	0.00113017
ENSDARG00000068655	5.64847	4.1675	1.13261	0.000255987	0.00113039
ENSDARG00000092478	10.0364	2.78777	0.638167	0.000256215	0.00113039
ENSDARG00000057882	25.0199	2.64128	0.598101	0.00025809	0.00113731
ENSDARG00000098670	106.954	2.20413	0.484712	0.000258401	0.00113733
ENSDARG00000098853	55.715	1.51438	0.319941	0.000259862	0.00114241
ENSDARG00000104030	20.5358	2.6505	0.601649	0.000267177	0.00117317
ENSDARG00000014587	97.4264	1.94735	0.422593	0.000271302	0.00118988
ENSDARG00000012138	15.1402	2.43204	0.544058	0.000271766	0.0011905
ENSDARG00000035987	16.0376	2.66954	0.607533	0.000273281	0.00119573
ENSDARG00000089372	398.824	1.69739	0.363209	0.000274739	0.00120069
ENSDARG00000057698	114.857	2.06607	0.451878	0.000275545	0.00120279
ENSDARG00000075034	59.2648	2.55773	0.577774	0.000277466	0.00120975
ENSDARG00000071518	148.956	-1.92	0.416523	0.000279175	0.00121577
ENSDARG00000017490	51.4889	2.59686	0.588633	0.000280867	0.0012217
ENSDARG00000017658	20.2896	2.14503	0.472051	0.000283612	0.0012322
ENSDARG00000035264	15.2036	2.65436	0.604629	0.000284509	0.00123465
ENSDARG00000035985	15.1947	2.58447	0.585785	0.000285542	0.00123768
ENSDARG00000039878	30.9195	2.04819	0.448249	0.000285942	0.00123797
ENSDARG00000040046	8.33872	3.73063	0.952278	0.000288393	0.00124712
ENSDARG00000009982	101.717	-1.79001	0.386017	0.00028994	0.00125235
ENSDARG00000056490	33.6775	1.81378	0.391872	0.000292942	0.00126385
ENSDARG00000101246	34.6717	1.96309	0.428415	0.000300612	0.00129543
ENSDARG00000039931	10.9541	2.96167	0.694118	0.000302059	0.00130015
ENSDARG00000052465	101.153	-2.37925	0.533269	0.000303878	0.00130647
ENSDARG00000036252	9.4273	2.921	0.682371	0.00030424	0.0013065
ENSDARG00000036549	134.341	1.60246	0.342809	0.000309043	0.00132559
ENSDARG00000094104	8.43208	3.45176	0.8542	0.000315741	0.00135276
ENSDARG00000013279	8.63243	3.57236	0.898021	0.000317334	0.00135801
ENSDARG00000092154	35.154	1.97991	0.434146	0.000325999	0.00139349
ENSDARG00000039185	162.683	3.27495	0.795939	0.000329206	0.00140557
ENSDARG00000104996	12.5685	2.40187	0.542293	0.000341745	0.00145743
ENSDARG00000007279	17.6643	3.16543	0.762124	0.000342676	0.00145972
ENSDARG00000045980	25.9549	2.70073	0.623444	0.000343483	0.00146148
ENSDARG00000057484	42.8361	2.32613	0.522777	0.000345226	0.00146721
ENSDARG00000006192	21.4107	2.75716	0.639857	0.00034854	0.0014796
ENSDARG00000020101	79.7272	1.47387	0.314711	0.000349271	0.001481
ENSDARG00000045898	32.2631	1.86278	0.406959	0.000350807	0.00148582
ENSDARG00000059327	158.453	-1.88618	0.413048	0.000358136	0.00151513
ENSDARG00000036776	14.1054	2.94859	0.696822	0.000358742	0.00151596
ENSDARG00000039997	25.7923	1.95371	0.429721	0.000360408	0.00152127
ENSDARG00000043663	27.2136	2.79621	0.652633	0.000364974	0.00153879
ENSDARG00000029204	66.2816	3.63663	0.931268	0.000366488	0.00154341
ENSDARG00000087303	195.765	1.8127	0.395734	0.000368771	0.00155127
ENSDARG00000040534	176.996	1.91016	0.419506	0.000369319	0.00155167
ENSDARG00000020197	236.259	1.78776	0.389752	0.000369705	0.00155167
ENSDARG00000013777	22.3992	2.89475	0.682708	0.000377642	0.0015817
ENSDARG00000030949	15.3564	2.35638	0.533021	0.000377713	0.0015817
ENSDARG00000087647	205.16	1.2576	0.266677	0.000386472	0.00161655
ENSDARG00000074533	28.4063	2.04234	0.453269	0.000388214	0.00162201
ENSDARG00000055510	27.3541	2.26174	0.509456	0.000394278	0.00164549
ENSDARG00000091419	59.2791	2.65059	0.614171	0.000397612	0.00165754
ENSDARG00000063922	71.659	1.99503	0.442138	0.000400863	0.00166744
ENSDARG00000042933	228.659	-1.51009	0.325084	0.000400887	0.00166744
ENSDARG00000078041	14.0686	2.28443	0.515893	0.000402863	0.00167312
ENSDARG00000007526	9.85037	3.38952	0.845473	0.000403223	0.00167312
ENSDARG00000074645	118.856	-2.20421	0.495194	0.000403608	0.00167312
ENSDARG00000035625	25.6268	1.9969	0.442972	0.000407983	0.00168937
ENSDARG00000009169	7.65619	3.22385	0.789611	0.000410829	0.00169856
ENSDARG00000029581	5.95407	4.28762	1.25241	0.000411158	0.00169856
ENSDARG00000105214	168.968	-2.38842	0.543796	0.000411578	0.00169856
ENSDARG00000009978	72.4028	2.96881	0.709373	0.00042175	0.00173861
ENSDARG00000022684	249.918	3.28884	0.81294	0.000422674	0.00174048
ENSDARG00000052960	20.9259	2.72564	0.637527	0.000423468	0.00174181
ENSDARG00000092387	8.95748	3.20501	0.785479	0.000429462	0.00176451
ENSDARG00000042557	7.01142	4.47261	1.39984	0.000432129	0.0017735
ENSDARG00000043287	6.92275	4.11444	1.1599	0.000435576	0.00178567
ENSDARG00000095767	12.3523	3.18085	0.779126	0.000444578	0.00182056
ENSDARG00000043531	45.6797	1.99391	0.444081	0.000445379	0.00182088
ENSDARG00000036107	47.998	2.09435	0.469452	0.000445758	0.00182088
ENSDARG00000058158	6.79996	2.86889	0.681336	0.000446129	0.00182088
ENSDARG00000021805	138.272	-2.08765	0.467941	0.000449553	0.00183276
ENSDARG00000054849	40.6926	2.0397	0.455821	0.00045003	0.00183276
ENSDARG00000058105	6515.22	1.79988	0.396374	0.00045257	0.00184108
ENSDARG00000042467	159.683	-1.84678	0.407939	0.000454081	0.0018452
ENSDARG00000022845	12.0854	2.97903	0.715796	0.000456849	0.00185442
ENSDARG00000011376	6.54133	3.58231	0.924498	0.000457549	0.00185448
ENSDARG00000099741	10.0262	3.49997	0.893019	0.000457867	0.00185448
ENSDARG00000077526	48.1153	2.88733	0.687939	0.000458648	0.00185562
ENSDARG00000098334	47.2754	2.0539	0.459942	0.000460942	0.00186223
ENSDARG00000014907	7.96835	2.83489	0.672467	0.000461285	0.00186223
ENSDARG00000039493	35.7128	2.12795	0.478982	0.000464509	0.0018732
ENSDARG00000068820	13.6103	3.36483	0.84453	0.000465364	0.00187461
ENSDARG00000017489	21.4778	2.76235	0.651745	0.000469231	0.00188813
ENSDARG00000052578	20.4882	3.27357	0.813709	0.000475386	0.00191082
ENSDARG00000023309	6.63195	3.94635	1.08464	0.000478839	0.00192262
ENSDARG00000103811	182.756	-1.98622	0.444365	0.000494079	0.00198166
ENSDARG00000045565	12.5699	2.47031	0.571738	0.000505061	0.00202352
ENSDARG00000101127	29.1521	2.71147	0.639657	0.00050627	0.00202618
ENSDARG00000093456	45.1844	2.30123	0.526625	0.000512902	0.0020505
ENSDARG00000098646	10.3399	2.95696	0.714123	0.000517523	0.00206674
ENSDARG00000076572	1494.16	2.59338	0.60699	0.000522565	0.00208463
ENSDARG00000054164	9.36414	2.81366	0.671317	0.000529031	0.00210816
ENSDARG00000026229	69.0781	-2.94257	0.710935	0.000533796	0.00212486
ENSDARG00000070658	90.1548	-2.8079	0.671031	0.000549434	0.00218404
ENSDARG00000089742	48.1762	-2.9891	0.72677	0.00054984	0.00218404
ENSDARG00000058041	30.6962	2.43585	0.565385	0.000560071	0.0022223
ENSDARG00000044619	31.0554	2.23623	0.511981	0.00056506	0.00223969
ENSDARG00000016551	85.0068	1.86502	0.41678	0.000565956	0.00224085
ENSDARG00000074540	15.4686	2.66661	0.632531	0.000598555	0.0023665
ENSDARG00000099743	6.37542	3.35409	0.85482	0.00059897	0.0023665
ENSDARG00000073750	1677.52	2.41776	0.563089	0.000612573	0.00241565
ENSDARG00000007172	612.507	-1.34668	0.292824	0.000612711	0.00241565
ENSDARG00000003311	359.839	-1.58881	0.35038	0.000613885	0.0024177
ENSDARG00000037259	6.75131	3.23887	0.815122	0.000615379	0.00242101
ENSDARG00000014222	69.5101	1.26672	0.274882	0.000643092	0.00252736
ENSDARG00000041314	58.0625	2.43128	0.568809	0.000654554	0.00256968
ENSDARG00000026476	11.9433	2.56059	0.60522	0.000656831	0.00257589
ENSDARG00000090512	24.149	2.01392	0.457893	0.000661872	0.00259164
ENSDARG00000023495	84.9643	-1.92668	0.435597	0.000662708	0.00259164
ENSDARG00000020946	68.6746	1.56275	0.345332	0.000662946	0.00259164
ENSDARG00000040838	6.41995	3.23334	0.81737	0.000665859	0.00260029
ENSDARG00000008398	88.0621	-2.14054	0.491545	0.00068142	0.00265826
ENSDARG00000073926	45.2425	1.74544	0.390915	0.000692829	0.00269992
ENSDARG00000104279	1269.15	1.29925	0.283443	0.000696149	0.00271001
ENSDARG00000073710	484.818	-1.44939	0.318928	0.000699385	0.00271975
ENSDARG00000016173	141.502	1.00557	0.216637	0.000706393	0.00274412
ENSDARG00000054272	2576.52	-1.05321	0.227379	0.000711694	0.00276182
ENSDARG00000058230	25.9181	1.86921	0.422949	0.000726713	0.00281715
ENSDARG00000024651	19.1828	3.33651	0.859792	0.00072902	0.00282314
ENSDARG00000094836	156.403	1.479	0.326673	0.00073035	0.00282534
ENSDARG00000075768	132.868	1.63422	0.364538	0.00073683	0.00284744
ENSDARG00000043334	38.349	1.94904	0.443775	0.000741932	0.00286417
ENSDARG00000014674	40.4987	1.75269	0.394136	0.000746229	0.00287776
ENSDARG00000100703	22.5063	2.79276	0.678679	0.000752498	0.00289858
ENSDARG00000056740	29.383	2.08763	0.480119	0.000753192	0.00289858
ENSDARG00000071872	9.74988	2.88861	0.708909	0.000760246	0.00292269
ENSDARG00000099624	97.8944	1.565	0.348162	0.000761875	0.00292592
ENSDARG00000075382	5.82053	3.27413	0.839639	0.000765064	0.00293244
ENSDARG00000093124	5.88044	3.51364	0.931675	0.000765156	0.00293244
ENSDARG00000068912	39.4356	2.42428	0.571738	0.000767265	0.00293749
ENSDARG00000100021	11.7465	3.058	0.764762	0.000773348	0.00295772
ENSDARG00000053452	5.11293	4.12505	1.23925	0.000783218	0.00299238
ENSDARG00000042249	242.311	-2.17035	0.503072	0.000785163	0.00299672
ENSDARG00000089529	4.88696	3.48111	0.920788	0.000790701	0.00301475
ENSDARG00000098451	26.6758	2.20463	0.512496	0.00079241	0.00301512
ENSDARG00000041974	26.8094	2.62405	0.630036	0.000792424	0.00301512
ENSDARG00000027649	8.2301	2.88445	0.709503	0.000794955	0.00301981
ENSDARG00000057699	50.7929	1.90653	0.434389	0.000795288	0.00301981
ENSDARG00000043313	767.604	-1.00445	0.217573	0.000797542	0.00302527
ENSDARG00000010381	18.6009	2.149	0.499341	0.000846745	0.00320863
ENSDARG00000028096	7.86116	3.15001	0.801344	0.000854447	0.00323451
ENSDARG00000103712	8.62372	2.58673	0.622184	0.000864662	0.00326983
ENSDARG00000019304	59.7521	1.61989	0.363942	0.000871048	0.00329063
ENSDARG00000094310	686.224	2.25055	0.527619	0.00087401	0.00329845
ENSDARG00000018757	11.1602	2.88856	0.715402	0.000883748	0.00333181
ENSDARG00000069832	7.11295	3.68182	1.01521	0.000885573	0.0033353
ENSDARG00000101669	13.4953	2.60567	0.628841	0.000891331	0.00335358
ENSDARG00000017595	43.726	1.71318	0.387744	0.00089648	0.00336953
ENSDARG00000090401	7.01041	3.76577	1.05604	0.000899456	0.00337249
ENSDARG00000042151	52.9865	1.72172	0.389967	0.000900002	0.00337249
ENSDARG00000023003	18.8701	2.21858	0.519738	0.000900191	0.00337249
ENSDARG00000095157	58.1387	2.20069	0.514904	0.000900908	0.00337249
ENSDARG00000040926	27.893	2.49663	0.597484	0.00090229	0.00337425
ENSDARG00000005823	110.408	-1.61992	0.364611	0.000904134	0.00337774
ENSDARG00000061093	51.576	-2.25681	0.53032	0.000905183	0.00337826
ENSDARG00000032866	63.1986	2.00602	0.463312	0.000911823	0.00339961
ENSDARG00000038309	9.87873	2.80787	0.691242	0.000913255	0.00340002
ENSDARG00000097902	13.9521	2.68483	0.65341	0.000913768	0.00340002
ENSDARG00000016412	30.2283	2.37062	0.562171	0.000915489	0.00340301
ENSDARG00000012144	29.0848	1.89199	0.433824	0.000919846	0.00341578
ENSDARG00000030349	391.535	2.29128	0.540365	0.000923373	0.00342544
ENSDARG00000040282	18.3847	3.46031	0.924297	0.000940221	0.00348446
ENSDARG00000074507	141.583	1.73308	0.393738	0.00094302	0.00349134
ENSDARG00000009493	205.991	-1.39719	0.310882	0.00094446	0.00349318
ENSDARG00000068436	230.366	1.94017	0.447494	0.000968754	0.00357947
ENSDARG00000068100	129.894	-2.17096	0.508959	0.00097362	0.00359386
ENSDARG00000090191	5.91698	3.07926	0.784255	0.000988086	0.00364363
ENSDARG00000016058	21.7121	2.3735	0.566187	0.00101494	0.00373894
ENSDARG00000052114	494.145	-1.35982	0.302976	0.00101662	0.00374141
ENSDARG00000007523	106.266	1.61414	0.365366	0.00102217	0.00375809
ENSDARG00000012555	13.7635	2.57881	0.626036	0.00102784	0.00377521
ENSDARG00000038672	123.212	-2.12662	0.49865	0.00103682	0.00380441
ENSDARG00000078348	626.871	-1.37504	0.307036	0.00104461	0.00382919
ENSDARG00000091631	16.6837	2.06483	0.482323	0.00104799	0.00383779
ENSDARG00000100242	29.6107	2.23393	0.528373	0.00105389	0.0038556
ENSDARG00000099092	148.306	-2.79394	0.693718	0.00107505	0.00392912
ENSDARG00000019367	21.5601	1.91568	0.44355	0.00107846	0.0039377
ENSDARG00000021252	336.522	1.78271	0.409147	0.00108185	0.0039462
ENSDARG00000089390	75.991	-2.82307	0.703475	0.00108703	0.0039612
ENSDARG00000102015	23.3958	1.79312	0.412055	0.001094	0.00398053
ENSDARG00000079854	534.327	-1.4933	0.336579	0.00109448	0.00398053
ENSDARG00000036773	16.6973	2.22768	0.527861	0.00109941	0.00399452
ENSDARG00000019060	30.6931	1.80556	0.415646	0.00111424	0.00404445
ENSDARG00000100742	162.403	1.71619	0.393158	0.00113848	0.00412839
ENSDARG00000076796	281.992	-1.16584	0.258543	0.00114443	0.00414589
ENSDARG00000097452	10.5998	2.72598	0.675315	0.0011545	0.0041783
ENSDARG00000055080	172.033	1.53356	0.347487	0.00115803	0.00418697
ENSDARG00000009724	9.7851	2.76455	0.687917	0.00116762	0.00421667
ENSDARG00000044874	32.59	2.34475	0.56247	0.00116852	0.00421667
ENSDARG00000034270	98.2163	1.21578	0.270817	0.00119236	0.00429852
ENSDARG00000035325	23.5972	2.02198	0.474139	0.00119367	0.00429908
ENSDARG00000102353	743.691	-1.68444	0.386402	0.00121864	0.00438472
ENSDARG00000053505	6.39351	3.28121	0.870501	0.00122235	0.00439382
ENSDARG00000019033	56.8904	1.92966	0.450198	0.00122538	0.00440044
ENSDARG00000053457	1563.47	1.70606	0.392173	0.00123404	0.00442725
ENSDARG00000003564	11.1082	2.74106	0.683269	0.00124723	0.00446761
ENSDARG00000069476	182.602	-1.30333	0.29233	0.0012477	0.00446761
ENSDARG00000080337	199218	1.48855	0.337723	0.00125868	0.00450257
ENSDARG00000088929	37.7708	2.29459	0.550904	0.00127226	0.00454675
ENSDARG00000086906	9.67841	2.72622	0.679511	0.00127512	0.00455261
ENSDARG00000010745	48.1882	1.67254	0.384285	0.0012774	0.00455636
ENSDARG00000059722	132.403	-1.81097	0.420051	0.00128149	0.00456655
ENSDARG00000105811	59.6603	-2.40987	0.584582	0.00129787	0.00462048
ENSDARG00000052746	112.269	2.34739	0.567016	0.00131648	0.00468221
ENSDARG00000028017	53.6163	2.43974	0.593988	0.00132465	0.00470548
ENSDARG00000017762	234.493	-1.27511	0.286391	0.00132556	0.00470548
ENSDARG00000079671	7.17722	3.5369	0.983305	0.00132865	0.00471195
ENSDARG00000044601	65.4322	1.52933	0.348996	0.00134288	0.00475784
ENSDARG00000077912	24.3527	1.76837	0.410016	0.00134555	0.00476276
ENSDARG00000003941	19.5492	2.17023	0.517839	0.00135002	0.00477401
ENSDARG00000081423	187.139	2.14831	0.511917	0.00135711	0.00479452
ENSDARG00000042410	19.0315	3.03716	0.786677	0.00136983	0.00483485
ENSDARG00000086224	75.9129	-2.32957	0.563291	0.00137449	0.00484668
ENSDARG00000032836	37.9793	2.34742	0.568761	0.00138908	0.00489347
ENSDARG00000053395	46.1431	1.55646	0.356455	0.00139235	0.00490033
ENSDARG00000045153	5.10226	3.67463	1.05323	0.00139978	0.0049218
ENSDARG00000024846	11.5809	2.65001	0.659834	0.00141246	0.00496167
ENSDARG00000004843	9.16414	3.68718	1.06068	0.00141621	0.00497015
ENSDARG00000063242	16.4712	2.65225	0.661361	0.00144174	0.00505494
ENSDARG00000093382	37.2785	1.91904	0.451641	0.00146565	0.00513391
ENSDARG00000055760	8.46857	3.10361	0.816176	0.00151142	0.00528924
ENSDARG00000035329	90.3185	2.05946	0.490632	0.00152324	0.0053256
ENSDARG00000093453	19.2902	2.05667	0.489998	0.00153068	0.00534278
ENSDARG00000057121	13.8761	2.57994	0.641352	0.00153104	0.00534278
ENSDARG00000018328	14.8777	2.56988	0.638311	0.00153309	0.00534374
ENSDARG00000052244	190.99	1.53007	0.351548	0.00153544	0.00534374
ENSDARG00000052923	12.6732	2.54683	0.631329	0.00153564	0.00534374
ENSDARG00000039730	303.541	2.08785	0.498694	0.00153748	0.00534512
ENSDARG00000037415	90.3139	-2.51142	0.620958	0.00155114	0.00538755
ENSDARG00000057414	81.5584	1.83723	0.431251	0.00155442	0.00539388
ENSDARG00000045835	8.43039	3.35752	0.918499	0.00157449	0.00545842
ENSDARG00000025693	45.0432	1.92111	0.454087	0.00158467	0.0054886
ENSDARG00000078535	94.1769	-2.10381	0.504053	0.00159086	0.00550488
ENSDARG00000037284	24.7578	2.51928	0.624738	0.0016101	0.00556624
ENSDARG00000090912	10.2625	3.02046	0.789826	0.00162034	0.00559644
ENSDARG00000028048	50.2957	2.25638	0.547608	0.00162371	0.00560285
ENSDARG00000029157	4.91874	3.12267	0.827839	0.00163361	0.00563177
ENSDARG00000041569	14.0062	2.66306	0.670057	0.00163919	0.00564089
ENSDARG00000014083	4.61924	4.13097	1.38625	0.0016393	0.00564089
ENSDARG00000002002	5.91837	3.82022	1.15058	0.00165509	0.00568996
ENSDARG00000105098	13.0411	2.37104	0.581606	0.00166246	0.00571
ENSDARG00000074572	31.2121	2.20099	0.532597	0.00166417	0.00571056
ENSDARG00000043133	8.64226	2.62944	0.660367	0.00167615	0.00574635
ENSDARG00000104495	13.5899	2.73104	0.693695	0.00170954	0.00585541
ENSDARG00000038693	15.142	2.54035	0.63361	0.0017161	0.00587245
ENSDARG00000013144	341.479	1.52501	0.352358	0.00172523	0.00589824
ENSDARG00000090654	55.4617	1.59225	0.36959	0.00173011	0.00590947
ENSDARG00000092191	11.6438	3.0401	0.800695	0.00173335	0.00591508
ENSDARG00000032865	1167.51	-1.47534	0.339949	0.00174137	0.00593698
ENSDARG00000063917	791.197	2.08047	0.500122	0.00174315	0.00593761
ENSDARG00000079446	17.071	2.8351	0.729418	0.001756	0.00597588
ENSDARG00000093058	18.6179	2.42892	0.601383	0.00179078	0.00608867
ENSDARG00000096877	8.67039	2.64339	0.668033	0.00181245	0.00615669
ENSDARG00000045316	178.077	1.01492	0.228707	0.00183373	0.00622325
ENSDARG00000040730	18.8879	2.68071	0.680544	0.00183632	0.00622634
ENSDARG00000103802	119.505	-1.54887	0.359663	0.00184361	0.00624536
ENSDARG00000022410	53.2009	1.60292	0.373662	0.001853	0.00627144
ENSDARG00000045402	71.2222	2.1958	0.534491	0.00185923	0.00627875
ENSDARG00000071871	5.42467	3.30575	0.908878	0.00185939	0.00627875
ENSDARG00000105288	55.7585	1.62903	0.380501	0.00186024	0.00627875
ENSDARG00000028448	6.55003	3.03579	0.80465	0.00190976	0.00643717
ENSDARG00000075513	111.058	-1.81223	0.429343	0.00191066	0.00643717
ENSDARG00000088823	1504.62	2.82538	0.7305	0.00192138	0.00646741
ENSDARG00000024877	24.2868	2.34279	0.578473	0.00193505	0.00650753
ENSDARG00000054152	107.09	-2.73638	0.701147	0.00194002	0.00651833
ENSDARG00000059906	403.138	1.97892	0.474991	0.00194396	0.00652565
ENSDARG00000037059	111.788	-1.68397	0.395846	0.00195391	0.00655312
ENSDARG00000060222	10.8386	2.93091	0.768236	0.00196315	0.00657815
ENSDARG00000070047	13.1826	2.48834	0.6229	0.00196785	0.00657939
ENSDARG00000003592	4.64045	4.06858	1.36821	0.00196983	0.00657939
ENSDARG00000020084	21.9722	2.80332	0.724232	0.00196996	0.00657939
ENSDARG00000038615	84.4451	1.76873	0.41844	0.00197062	0.00657939
ENSDARG00000002467	10.7915	2.50972	0.629923	0.00199049	0.00663547
ENSDARG00000093768	78.0333	2.36279	0.585391	0.001991	0.00663547
ENSDARG00000099997	11.243	2.6902	0.687421	0.00200212	0.00666654
ENSDARG00000069792	871.011	2.8581	0.744086	0.00201496	0.00670326
ENSDARG00000068940	115.243	2.17803	0.531922	0.00201795	0.00670718
ENSDARG00000099220	62.4381	-2.60919	0.662139	0.00204087	0.0067773
ENSDARG00000091655	9.79335	2.9134	0.765469	0.00209422	0.00694824
ENSDARG00000017385	12.0171	2.74106	0.706318	0.00209808	0.00695483
ENSDARG00000104082	172.103	-1.97557	0.476174	0.002105	0.00697154
ENSDARG00000099307	4.25943	3.68492	1.10175	0.00210723	0.00697269
ENSDARG00000063713	73.169	-2.28748	0.565322	0.00212415	0.00702238
ENSDARG00000021220	8.38016	3.0655	0.822502	0.0021398	0.00706782
ENSDARG00000075936	90.9875	-2.22001	0.545885	0.00214187	0.00706835
ENSDARG00000043898	8.2309	2.60328	0.662893	0.00217267	0.00716362
ENSDARG00000074552	119.027	2.16266	0.530102	0.00219533	0.00723192
ENSDARG00000096080	4.92165	3.49492	1.00819	0.0022139	0.00728659
ENSDARG00000101216	21.699	2.17418	0.533981	0.00223569	0.0073518
ENSDARG00000014962	206.853	-1.36722	0.316974	0.00224196	0.00736586
ENSDARG00000039626	32.1157	2.27872	0.56462	0.00224636	0.00737378
ENSDARG00000014490	16.1848	2.35509	0.588183	0.00229974	0.00754234
ENSDARG00000040505	15.5907	2.2275	0.550474	0.00230789	0.00756238
ENSDARG00000097196	31.4146	2.20568	0.544256	0.00231846	0.00759031
ENSDARG00000002792	49.8477	1.95885	0.474294	0.002334	0.00763443
ENSDARG00000053217	25.2023	2.57838	0.658195	0.0023474	0.00767147
ENSDARG00000101835	41.6382	-3.61439	1.07615	0.00236993	0.00773829
ENSDARG00000015853	31.6225	2.41914	0.609866	0.00244247	0.00796813
ENSDARG00000096322	353.086	-2.22983	0.553115	0.00245006	0.00798584
ENSDARG00000003531	106.057	1.71861	0.409972	0.0024537	0.00799071
ENSDARG00000038312	77.9167	3.24547	0.904492	0.00247801	0.00806279
ENSDARG00000102379	20.3617	2.00411	0.488768	0.00249417	0.00810824
ENSDARG00000003446	81.61	-2.79375	0.732729	0.0025008	0.00812268
ENSDARG00000003607	14.605	2.36598	0.594711	0.00251522	0.00816236
ENSDARG00000036057	6.86043	3.09905	0.846034	0.00253065	0.00820525
ENSDARG00000018404	71.2879	1.76408	0.422969	0.00253595	0.00821524
ENSDARG00000061629	6.538	3.2855	0.923954	0.00255196	0.00825523
ENSDARG00000016979	8.04081	2.77689	0.727962	0.00255402	0.00825523
ENSDARG00000043484	157.996	1.63937	0.389726	0.00255498	0.00825523
ENSDARG00000076128	415.193	-1.17485	0.271214	0.00256137	0.00826866
ENSDARG00000071065	27.7735	2.56655	0.658146	0.00256402	0.00827001
ENSDARG00000074129	24.4897	1.81301	0.43694	0.00260773	0.00840369
ENSDARG00000042056	52.7783	2.44154	0.619656	0.00263141	0.00847265
ENSDARG00000036912	15.0603	2.21514	0.551226	0.00263763	0.00848528
ENSDARG00000030824	23.8335	1.91097	0.464324	0.00264688	0.00850765
ENSDARG00000070061	14.8882	2.74113	0.717516	0.00265049	0.00851188
ENSDARG00000100007	61.8362	-3.38411	0.972026	0.00266466	0.00854998
ENSDARG00000014828	15.4541	2.35284	0.592867	0.00266752	0.00855177
ENSDARG00000097057	25.7366	2.5836	0.665521	0.00267754	0.00857395
ENSDARG00000091306	155.725	-1.39232	0.326324	0.00267907	0.00857395
ENSDARG00000029064	50.5597	2.30486	0.578567	0.00268489	0.00858516
ENSDARG00000098140	11.7878	2.15055	0.533751	0.00275979	0.00881706
ENSDARG00000008170	18.7841	2.133	0.528869	0.00278028	0.00887485
ENSDARG00000056998	44.5051	1.67082	0.399997	0.00278806	0.00889205
ENSDARG00000040650	25.088	2.10799	0.521858	0.00280263	0.00893083
ENSDARG00000003109	12.2793	2.44687	0.624429	0.00284734	0.0090655
ENSDARG00000059404	31.2867	2.02964	0.499898	0.00285745	0.00908989
ENSDARG00000100366	18.3746	2.33723	0.590815	0.0028721	0.00912678
ENSDARG00000012244	49.126	2.15086	0.535133	0.00287397	0.00912678
ENSDARG00000045160	7.89461	4.04684	1.47779	0.00287719	0.00912915
ENSDARG00000104139	170.727	1.68373	0.40436	0.00290265	0.00920208
ENSDARG00000075543	133.041	1.65112	0.395833	0.00293409	0.00929379
ENSDARG00000020976	12.3833	2.64217	0.688967	0.00293698	0.009295
ENSDARG00000023933	51.2294	-2.48872	0.639215	0.00295798	0.00935347
ENSDARG00000043095	14.062	2.35489	0.597698	0.00298814	0.0094408
ENSDARG00000062376	61.8763	1.59464	0.381168	0.00299287	0.00944768
ENSDARG00000039887	180.304	1.77158	0.429013	0.00300162	0.00946723
ENSDARG00000057583	317.587	-0.963973	0.22222	0.00300747	0.00947023
ENSDARG00000018319	519.033	-1.11063	0.257676	0.00300897	0.00947023
ENSDARG00000006878	137.441	-1.54012	0.366845	0.00301024	0.00947023
ENSDARG00000098080	544.061	-1.15985	0.269799	0.00301477	0.00947645
ENSDARG00000104018	65.5398	1.68478	0.405535	0.00302004	0.00948454
ENSDARG00000006215	13.3471	2.8365	0.757741	0.00302246	0.00948454
ENSDARG00000101110	4.53482	3.44487	1.01325	0.00303117	0.00950382
ENSDARG00000103235	5.75382	3.51719	1.05082	0.00303909	0.00952061
ENSDARG00000007836	98.0751	2.18752	0.547826	0.00304565	0.00953308
ENSDARG00000104517	66.8669	2.28692	0.577768	0.00305741	0.00956183
ENSDARG00000045568	16.3966	2.15816	0.539372	0.00306659	0.00958244
ENSDARG00000045296	62.2553	2.21204	0.555524	0.00308257	0.00962426
ENSDARG00000087341	39.8863	-3.43294	1.01015	0.00312238	0.00974036
ENSDARG00000043902	39.7804	-3.50993	1.05094	0.00315497	0.00983374
ENSDARG00000035608	34.4631	1.67634	0.40452	0.00319459	0.00994886
ENSDARG00000005456	103.559	-2.05154	0.509567	0.00320039	0.00995857
ENSDARG00000015222	11.0756	2.45927	0.633239	0.00321338	0.00999055
ENSDARG00000037108	9.92626	3.16201	0.888331	0.00321606	0.00999055
ENSDARG00000067832	180.234	-1.92294	0.473143	0.00324239	0.0100639
ENSDARG00000036438	30.1847	1.92829	0.474759	0.00325432	0.0100858
ENSDARG00000061517	76.9535	-2.08751	0.520541	0.00325489	0.0100858
ENSDARG00000017659	36.0908	2.69217	0.710902	0.00326005	0.0100933
ENSDARG00000098108	13.6049	2.62465	0.688102	0.00327012	0.0101161
ENSDARG00000042962	66.928	1.65925	0.400468	0.00327739	0.0101232
ENSDARG00000057011	5.99842	2.87064	0.774699	0.00327789	0.0101232
ENSDARG00000105114	476.321	-1.13767	0.265617	0.003308	0.0102077
ENSDARG00000004714	130.105	2.02441	0.503059	0.00334625	0.0103171
ENSDARG00000003527	44.8318	1.71231	0.415828	0.00341156	0.0105097
ENSDARG00000074481	65.8523	-2.25588	0.573409	0.00352319	0.0108446
ENSDARG00000039913	6.63363	3.01188	0.833373	0.00353644	0.0108764
ENSDARG00000000086	138.768	-1.58364	0.381811	0.00354737	0.010901
ENSDARG00000092624	64.0829	-1.8924	0.467092	0.00356412	0.0109434
ENSDARG00000101479	9.34437	2.83742	0.768213	0.00362714	0.0111262
ENSDARG00000041391	45.3367	1.84675	0.454712	0.0036325	0.0111262
ENSDARG00000028201	6.45603	3.07395	0.860297	0.00363268	0.0111262
ENSDARG00000075891	2.60139	3.96231	1.43579	0.00364456	NA
ENSDARG00000016676	598.706	1.35902	0.323123	0.00364639	0.011159
ENSDARG00000042793	74.189	-2.32557	0.59623	0.00365439	0.0111742
ENSDARG00000102643	83.4998	1.56631	0.378069	0.00370314	0.01131
ENSDARG00000097959	78.9758	2.04225	0.511351	0.00370645	0.01131
ENSDARG00000031664	6.67772	2.94137	0.808758	0.00370794	0.01131
ENSDARG00000039851	11.5724	2.45432	0.637864	0.00373051	0.0113695
ENSDARG00000056829	13.4285	2.43422	0.631579	0.00374726	0.0114111
ENSDARG00000076283	22.2742	2.28186	0.583726	0.00375703	0.0114315
ENSDARG00000077489	119.821	-1.92	0.476548	0.00377564	0.0114787
ENSDARG00000002264	4.83659	3.60521	1.12746	0.00379854	0.0115383
ENSDARG00000104031	6.18844	3.21324	0.923562	0.00380147	0.0115383
ENSDARG00000104801	6.70191	3.49667	1.06438	0.00380849	0.0115501
ENSDARG00000094198	44.2529	-2.36649	0.610872	0.0038287	0.0116019
ENSDARG00000074229	411.404	-1.13197	0.266407	0.00387042	0.0117143
ENSDARG00000078876	16.9595	2.87081	0.78448	0.00387412	0.0117143
ENSDARG00000045976	113.745	-2.089	0.526512	0.00387526	0.0117143
ENSDARG00000090634	73.554	1.92563	0.479004	0.00388934	0.0117473
ENSDARG00000091757	5.6353	3.50886	1.07436	0.00391543	0.0118158
ENSDARG00000037593	75.8294	-2.23552	0.571016	0.00391841	0.0118158
ENSDARG00000039490	9.01003	2.896	0.795355	0.00395938	0.0119296
ENSDARG00000098821	15.18	2.60135	0.690113	0.00402947	0.012131
ENSDARG00000038789	4.06697	3.59293	1.12788	0.00403511	0.0121381
ENSDARG00000011777	94.718	-1.85465	0.459975	0.0040672	0.0122247
ENSDARG00000006963	34.7101	2.09132	0.528883	0.00408159	0.0122493
ENSDARG00000098059	75.694	1.84701	0.457906	0.00408276	0.0122493
ENSDARG00000052638	6.16991	3.65896	1.17255	0.00408532	0.0122493
ENSDARG00000059128	125.233	1.44406	0.347501	0.00409326	0.0122632
ENSDARG00000094646	12.7738	2.52242	0.664605	0.00412544	0.0123496
ENSDARG00000054150	6.17992	2.95484	0.821369	0.00416108	0.0124463
ENSDARG00000028322	29.8818	2.024	0.509781	0.00418752	0.0125153
ENSDARG00000070985	31.4222	2.24627	0.576883	0.00420319	0.012552
ENSDARG00000045228	78.2363	1.81065	0.448469	0.00421714	0.0125835
ENSDARG00000035324	199.435	-1.8373	0.456113	0.00423135	0.0126157
ENSDARG00000078593	71.8947	-2.10181	0.533753	0.00430267	0.0128181
ENSDARG00000099692	6.22982	3.16458	0.912285	0.00433062	0.0128902
ENSDARG00000053810	72.4798	-1.73145	0.426909	0.00433382	0.0128902
ENSDARG00000101986	9.1138	2.96429	0.828104	0.00435395	0.0129396
ENSDARG00000059075	5.22711	3.93143	1.4709	0.00436183	0.0129527
ENSDARG00000088817	90.733	-1.95818	0.491944	0.00438982	0.0130254
ENSDARG00000013478	105.194	1.80026	0.446793	0.00442415	0.0131167
ENSDARG00000061062	8.10651	2.48333	0.655026	0.00445073	0.013185
ENSDARG00000091209	5.07622	3.1763	0.919949	0.00446062	0.0132037
ENSDARG00000042961	12.0114	2.57685	0.686795	0.00447578	0.013238
ENSDARG00000105179	62.9843	-2.41429	0.632764	0.00449321	0.0132696
ENSDARG00000003963	16.9011	2.30128	0.596587	0.00449362	0.0132696
ENSDARG00000098631	52.1873	-2.72956	0.741015	0.00451669	0.0133271
ENSDARG00000079731	126.315	-1.49176	0.36224	0.00453169	0.0133607
ENSDARG00000075045	2.42557	3.91366	1.45766	0.00456101	NA
ENSDARG00000057853	190.26	1.81522	0.451948	0.00457723	0.0134843
ENSDARG00000069018	6.86549	3.10336	0.889719	0.00458095	0.0134845
ENSDARG00000055283	26.8293	2.16169	0.554291	0.00461856	0.0135746
ENSDARG00000071051	15.6571	2.3204	0.603718	0.00461889	0.0135746
ENSDARG00000038537	7.3998	2.45664	0.647968	0.00463244	0.0136037
ENSDARG00000099329	11.9232	2.98107	0.839253	0.00464523	0.0136304
ENSDARG00000013741	5.91658	3.50325	1.09193	0.00465654	0.0136528
ENSDARG00000032532	23.6565	1.87187	0.469019	0.00471877	0.0138243
ENSDARG00000045019	71.029	1.55494	0.380437	0.00477232	0.0139701
ENSDARG00000019213	176.717	-1.36513	0.329614	0.00478809	0.0140053
ENSDARG00000060069	4.77346	2.94668	0.828116	0.00484183	0.0141513
ENSDARG00000087887	35.0619	1.82045	0.455033	0.00485481	0.014178
ENSDARG00000005416	21.2271	2.17319	0.559633	0.00486091	0.0141847
ENSDARG00000093182	8.7535	2.45204	0.648731	0.0048775	0.0142219
ENSDARG00000098671	18.5782	2.51673	0.670569	0.0048939	0.0142585
ENSDARG00000008765	3.32141	3.82201	1.35094	0.00494902	0.0144077
ENSDARG00000056656	11.589	2.63177	0.71109	0.00496866	0.0144536
ENSDARG00000011445	82.6798	-2.22661	0.577036	0.00497381	0.0144572
ENSDARG00000068893	6.91612	2.58919	0.697077	0.00505999	0.0146962
ENSDARG00000042344	52.6923	1.79424	0.448716	0.00507125	0.0147173
ENSDARG00000103774	184.634	-1.11691	0.266579	0.00509574	0.0147768
ENSDARG00000098992	11.3984	2.42466	0.641907	0.0051312	0.0148681
ENSDARG00000008502	307.67	1.2621	0.303994	0.00516591	0.0149569
ENSDARG00000013615	400.248	1.78961	0.448185	0.00522268	0.0151095
ENSDARG00000068996	23.9978	2.28918	0.599107	0.0052808	0.0152657
ENSDARG00000013976	10.7193	2.25103	0.587247	0.00531608	0.0153557
ENSDARG00000070866	55.322	1.64397	0.407961	0.00542659	0.0156627
ENSDARG00000058656	134.502	1.38142	0.336338	0.0054433	0.0156987
ENSDARG00000034916	14.037	2.26194	0.591776	0.00546361	0.0157451
ENSDARG00000021838	3574.51	2.29271	0.601691	0.00547641	0.0157697
ENSDARG00000063167	8.84095	2.8794	0.809775	0.00551443	0.0158607
ENSDARG00000014047	3.13433	3.87617	1.50055	0.00551659	0.0158607
ENSDARG00000027141	38.9637	1.5614	0.385733	0.00559443	0.0160721
ENSDARG00000091085	4.18597	3.83804	1.41764	0.00559885	0.0160723
ENSDARG00000029439	43.4856	1.55738	0.384661	0.0056035	0.0160732
ENSDARG00000042469	4.06963	3.80629	1.37212	0.00562596	0.0161251
ENSDARG00000088238	121.59	1.35193	0.329343	0.00569497	0.0163103
ENSDARG00000018145	14.4251	2.7682	0.769227	0.00575671	0.0164744
ENSDARG00000068916	4.0943	3.12174	0.916462	0.00577336	0.0165093
ENSDARG00000017798	106.944	-1.97233	0.50464	0.00579035	0.0165451
ENSDARG00000005772	615.953	-1.28907	0.313129	0.00582624	0.0166349
ENSDARG00000045850	22.766	1.92267	0.490388	0.00588963	0.0167974
ENSDARG00000102878	74.745	1.63652	0.407862	0.00589222	0.0167974
ENSDARG00000104810	109.022	-1.81834	0.459917	0.00591842	0.0168591
ENSDARG00000022430	16.2572	2.35587	0.625576	0.00593902	0.0169048
ENSDARG00000069135	212.008	1.29228	0.314447	0.00598312	0.0170172
ENSDARG00000052361	4.6944	3.62008	1.2077	0.00601059	0.0170823
ENSDARG00000003098	294.457	1.29677	0.315855	0.00605794	0.0172036
ENSDARG00000092394	20.249	2.59091	0.707463	0.00612672	0.0173856
ENSDARG00000061829	92.4073	-1.75113	0.441509	0.00614323	0.0174191
ENSDARG00000052712	76.029	1.38527	0.339769	0.00616209	0.0174593
ENSDARG00000102447	101.041	-1.73344	0.436685	0.00620328	0.0175625
ENSDARG00000060798	4.40318	3.51382	1.13744	0.00621996	0.0175938
ENSDARG00000070222	3.1873	3.73591	1.31904	0.00622382	0.0175938
ENSDARG00000063095	190.859	1.9493	0.500121	0.00624033	0.017627
ENSDARG00000075567	69.1922	-2.35198	0.626605	0.00626562	0.017685
ENSDARG00000036684	6.67956	3.50715	1.136	0.00634857	0.0179055
ENSDARG00000012972	31.784	2.18404	0.573323	0.00642128	0.0180968
ENSDARG00000055416	21.549	2.23243	0.588782	0.00642918	0.0181053
ENSDARG00000104582	10.483	2.77068	0.77706	0.00644727	0.0181424
ENSDARG00000011934	39.5583	1.88482	0.482146	0.00649524	0.0182636
ENSDARG00000003068	22.3578	1.98117	0.511286	0.00655277	0.0184099
ENSDARG00000031387	112.561	-2.2599	0.59843	0.00655943	0.0184099
ENSDARG00000005513	906.096	1.96877	0.507584	0.00656219	0.0184099
ENSDARG00000041051	82.0666	-1.69426	0.427105	0.00660576	0.0185181
ENSDARG00000045940	75.2035	1.58466	0.396094	0.00661981	0.0185435
ENSDARG00000061746	226.52	-1.76432	0.447424	0.00663684	0.0185771
ENSDARG00000009252	62.4576	-1.9303	0.496397	0.00664232	0.0185784
ENSDARG00000002768	78.1788	2.32173	0.619361	0.00667651	0.01866
ENSDARG00000014577	27.2877	1.6451	0.413474	0.00670702	0.0187311
ENSDARG00000024954	16.3828	2.02054	0.524218	0.00674284	0.018817
ENSDARG00000005754	237.581	1.05489	0.254928	0.00675674	0.0188392
ENSDARG00000014137	33.2415	1.76447	0.447978	0.00676095	0.0188392
ENSDARG00000089663	15.9328	2.81695	0.798784	0.00682046	0.0189823
ENSDARG00000042336	7.53886	2.76898	0.779909	0.00682255	0.0189823
ENSDARG00000069279	7.18988	3.41553	1.08859	0.0068717	0.0191047
ENSDARG00000069804	15.9686	-3.40089	1.08003	0.00688889	0.0191249
ENSDARG00000037804	16.9728	2.24572	0.595839	0.00688928	0.0191249
ENSDARG00000045127	11.0784	2.70168	0.754715	0.0068955	0.0191278
ENSDARG00000094486	2.58726	3.79938	1.45321	0.00689779	NA
ENSDARG00000037773	101.942	-1.32704	0.326316	0.00690296	0.0191342
ENSDARG00000041433	196.215	1.84431	0.472168	0.00694821	0.0192452
ENSDARG00000089791	26.4957	2.24298	0.59533	0.00695416	0.0192473
ENSDARG00000028539	63.3588	-1.60779	0.403864	0.00697394	0.0192876
ENSDARG00000073905	16.4074	2.56173	0.703989	0.00699685	0.0193366
ENSDARG00000037980	110.586	1.73112	0.439329	0.00701892	0.0193831
ENSDARG00000077725	39.7406	-3.32749	1.04033	0.0070634	0.0194914
ENSDARG00000052765	46.3743	1.46095	0.363357	0.00712598	0.0196495
ENSDARG00000032072	172.548	-1.89598	0.488524	0.00717456	0.0197687
ENSDARG00000097845	7.72638	2.44648	0.665212	0.00725062	0.0199634
ENSDARG00000035129	21.0926	2.1778	0.576252	0.00729333	0.0200661
ENSDARG00000055874	683.822	-0.908891	0.219276	0.00734531	0.0201941
ENSDARG00000063054	115.606	-2.12591	0.560178	0.00737511	0.0202572
ENSDARG00000100443	4.86201	3.14473	0.949026	0.00737917	0.0202572
ENSDARG00000069737	7.54071	3.06906	0.913385	0.00742142	0.0203512
ENSDARG00000077582	166.306	-1.2803	0.315173	0.00742602	0.0203512
ENSDARG00000105116	286.175	1.4396	0.358371	0.00742988	0.0203512
ENSDARG00000007918	12.5585	2.92879	0.851146	0.00745522	0.0204055
ENSDARG00000103358	4.87687	2.84167	0.815496	0.00754202	0.0206279
ENSDARG00000006314	64.5293	-1.69622	0.431766	0.00771625	0.0210888
ENSDARG00000076799	67.3256	1.96376	0.511809	0.00781575	0.021345
ENSDARG00000055075	254.726	-0.920719	0.22304	0.00783971	0.0213947
ENSDARG00000062831	23.1853	1.87688	0.485595	0.00785117	0.0214102
ENSDARG00000095947	13.7125	2.45297	0.671679	0.00790295	0.0215355
ENSDARG00000055912	7.49285	2.63188	0.73658	0.00793029	0.0215942
ENSDARG00000062305	48.0669	-2.34572	0.635311	0.00799211	0.0217465
ENSDARG00000043046	113.319	1.29241	0.319797	0.00800032	0.0217529
ENSDARG00000095863	6.27903	3.14024	0.955468	0.00808842	0.0219763
ENSDARG00000019636	9.41622	2.89593	0.843853	0.0081675	0.0221749
ENSDARG00000055540	233.811	-1.4744	0.370515	0.00832969	0.0225987
ENSDARG00000023797	149.737	-1.34221	0.334121	0.00835923	0.0226462
ENSDARG00000004452	273.327	1.20344	0.296837	0.00836074	0.0226462
ENSDARG00000035187	71.0733	-2.14545	0.571234	0.00836554	0.0226462
ENSDARG00000086856	180.012	1.35514	0.33775	0.00840183	0.0227279
ENSDARG00000103730	43.7466	1.55123	0.392669	0.00851579	0.0230056
ENSDARG00000004502	113.796	-1.59889	0.406272	0.00851693	0.0230056
ENSDARG00000014201	34.0208	1.52739	0.385952	0.0085295	0.0230228
ENSDARG00000099241	215.39	1.40307	0.351474	0.00863273	0.0232845
ENSDARG00000097467	4.13423	3.70714	1.39311	0.00867898	0.0233922
ENSDARG00000034497	9.5221	2.63275	0.742628	0.00874885	0.0235634
ENSDARG00000076833	43.9064	1.60873	0.409968	0.00881469	0.0237235
ENSDARG00000039872	5.91424	2.92887	0.864462	0.00887405	0.0238659
ENSDARG00000086269	150.901	-1.93294	0.50673	0.00891126	0.0239486
ENSDARG00000099256	112.805	-1.76506	0.456015	0.00892002	0.0239548
ENSDARG00000086169	58.6643	-2.1923	0.589344	0.00899367	0.0241351
ENSDARG00000044125	51.2433	1.8937	0.495338	0.00908543	0.0243637
ENSDARG00000034616	33.5008	1.9699	0.518843	0.00909311	0.0243666
ENSDARG00000036844	101.127	-1.98922	0.524937	0.00911331	0.0243963
ENSDARG00000101622	11.1536	2.69192	0.767963	0.00911734	0.0243963
ENSDARG00000015422	14.8372	2.64263	0.74917	0.00916506	0.0245063
ENSDARG00000099517	18.1006	2.03761	0.540509	0.00921028	0.0246095
ENSDARG00000098831	6.5861	2.55122	0.715339	0.00926097	0.0247271
ENSDARG00000006019	104.969	1.92054	0.504299	0.00928924	0.0247847
ENSDARG00000100024	46.566	-2.6859	0.766954	0.00931545	0.0248367
ENSDARG00000039820	45.0181	1.37635	0.345817	0.0093726	0.0249711
ENSDARG00000029500	1330.74	1.78889	0.464782	0.0094328	0.0251135
ENSDARG00000006786	11.7302	2.24576	0.609744	0.00958263	0.0254941
ENSDARG00000037873	9.27311	2.39708	0.661937	0.00964752	0.0256483
ENSDARG00000013926	6.95239	2.60524	0.738506	0.0097396	0.0258745
ENSDARG00000099635	350.035	1.10881	0.274518	0.00980587	0.0260319
ENSDARG00000035433	64.852	1.34283	0.33759	0.00984996	0.0261302
ENSDARG00000103484	4.3022	3.64684	1.35516	0.0099186	0.0262935
ENSDARG00000070573	38.1196	1.61022	0.413624	0.00999053	0.0264653
ENSDARG00000101624	120.627	-1.55405	0.397537	0.0100536	0.0266133
ENSDARG00000068716	13.5017	2.77997	0.810517	0.0101342	0.0268076
ENSDARG00000098999	14.5963	2.11101	0.567741	0.0101571	0.0268489
ENSDARG00000079850	53.1158	-1.86845	0.491301	0.0101797	0.0268895
ENSDARG00000032708	18.1669	2.06076	0.551745	0.0102155	0.0269556
ENSDARG00000006900	7.20276	2.68032	0.77063	0.0102193	0.0269556
ENSDARG00000035751	409.335	1.20389	0.300583	0.0102712	0.0270734
ENSDARG00000034215	13.0003	2.68637	0.773402	0.0102785	0.0270734
ENSDARG00000003207	4.55044	3.02822	0.923268	0.0103331	0.0271976
ENSDARG00000102221	7.25818	2.72147	0.788908	0.0104994	0.027616
ENSDARG00000035596	32.5163	2.17795	0.591399	0.0105846	0.0278203
ENSDARG00000099995	93.3432	-1.48448	0.378899	0.010601	0.0278436
ENSDARG00000055463	5.08348	3.21466	1.02424	0.0106592	0.0279651
ENSDARG00000016968	26.1866	1.71344	0.445816	0.0106623	0.0279651
ENSDARG00000105243	31.5411	1.86152	0.49088	0.0107277	0.0281166
ENSDARG00000069496	13.4305	2.52557	0.714321	0.0107783	0.0282291
ENSDARG00000063672	62.0356	-2.20792	0.60222	0.0107893	0.0282381
ENSDARG00000079839	6.57676	2.47049	0.694104	0.0108057	0.0282612
ENSDARG00000022659	20.2259	2.54095	0.720413	0.01084	0.0283307
ENSDARG00000076439	16.4271	2.22841	0.609438	0.0108691	0.0283867
ENSDARG00000105183	7.74887	2.91328	0.874292	0.0109473	0.0285708
ENSDARG00000026654	10.3906	2.48021	0.698596	0.0109912	0.0286654
ENSDARG00000079470	66.279	-2.44935	0.687458	0.0110224	0.0287264
ENSDARG00000078125	44.1602	1.88703	0.499694	0.0110329	0.0287336
ENSDARG00000068828	4.547	3.00467	0.918445	0.0111077	0.0288908
ENSDARG00000020497	35.2296	2.07069	0.558178	0.0111088	0.0288908
ENSDARG00000056186	61.1004	1.96382	0.52417	0.0111687	0.0290256
ENSDARG00000079396	25.4559	2.59019	0.740964	0.0111764	0.0290256
ENSDARG00000058666	12.7094	2.66744	0.771359	0.0111915	0.0290447
ENSDARG00000102995	31.4824	1.72419	0.450794	0.0113253	0.0293714
ENSDARG00000104700	54.5678	-1.96766	0.526073	0.0113844	0.029504
ENSDARG00000105394	6.36746	2.68548	0.779823	0.011401	0.0295263
ENSDARG00000005834	108.776	-1.62376	0.421148	0.0114222	0.0295604
ENSDARG00000027200	19.679	1.82316	0.481255	0.0114717	0.0296678
ENSDARG00000040072	6.59799	2.93317	0.887679	0.0115159	0.0297614
ENSDARG00000094833	12.4188	2.26572	0.624889	0.0115492	0.0298267
ENSDARG00000058729	7.05929	2.83793	0.845273	0.011607	0.0299552
ENSDARG00000089917	69.4283	-2.2971	0.636034	0.0116239	0.0299778
ENSDARG00000040192	9.39186	2.74869	0.807294	0.0116505	0.0300221
ENSDARG00000008808	25.6407	1.97832	0.530319	0.0116572	0.0300221
ENSDARG00000102048	8.02118	2.78764	0.825435	0.0119173	0.0306661
ENSDARG00000060411	3.70951	3.52238	1.26514	0.0119239	0.0306661
ENSDARG00000007745	102.887	1.76708	0.465363	0.01194	0.0306681
ENSDARG00000016733	16.3662	2.28793	0.634157	0.0119492	0.0306681
ENSDARG00000074079	72.767	-1.88414	0.501493	0.0119495	0.0306681
ENSDARG00000054597	5.71307	2.99963	0.923475	0.0120476	0.0308985
ENSDARG00000008861	6.32141	2.52098	0.719102	0.0120755	0.0309487
ENSDARG00000056590	6.39932	2.64028	0.765779	0.0121398	0.031092
ENSDARG00000020015	11.5011	2.43526	0.687586	0.0121615	0.031126
ENSDARG00000020217	19.8196	2.00281	0.539913	0.0122204	0.0312552
ENSDARG00000040135	60.3146	-2.28772	0.635228	0.0122399	0.0312836
ENSDARG00000075823	299.898	-1.66961	0.436922	0.0123431	0.0315256
ENSDARG00000014106	47.3335	1.67518	0.438872	0.0124654	0.0318158
ENSDARG00000007034	20.8898	2.02448	0.547964	0.0125625	0.0320416
ENSDARG00000020239	381.765	1.45424	0.374312	0.0125867	0.0320814
ENSDARG00000035899	8.11425	2.60313	0.753483	0.0126141	0.0321291
ENSDARG00000011727	8.56372	2.34896	0.658604	0.0126919	0.0322889
ENSDARG00000105463	18.1677	2.72661	0.804123	0.0126943	0.0322889
ENSDARG00000071684	113.363	-1.81319	0.48153	0.0127248	0.0323443
ENSDARG00000059843	66.4255	1.56166	0.40587	0.0127795	0.0324611
ENSDARG00000086272	12.3682	2.62414	0.763617	0.0129716	0.0329265
ENSDARG00000104069	59.227	1.32768	0.339153	0.013004	0.0329714
ENSDARG00000093851	82.8131	-2.13172	0.584706	0.0130071	0.0329714
ENSDARG00000031588	45.4286	1.81774	0.483825	0.0130747	0.0331201
ENSDARG00000042851	2.55007	3.63021	1.49826	0.0131121	NA
ENSDARG00000070390	12.7505	2.29938	0.642657	0.0131176	0.0332061
ENSDARG00000025397	43.834	1.91292	0.513877	0.0131494	0.033264
ENSDARG00000017466	222.417	-1.17021	0.296036	0.0132249	0.0334322
ENSDARG00000101199	171.79	1.82937	0.487924	0.013268	0.0335182
ENSDARG00000041217	15.2066	2.29771	0.64277	0.0133076	0.0335952
ENSDARG00000076804	42.3944	1.97391	0.533844	0.0133202	0.0336042
ENSDARG00000077207	79.5201	-1.89621	0.509474	0.013486	0.0339995
ENSDARG00000037158	22.213	1.95058	0.526995	0.0135558	0.0341521
ENSDARG00000088641	8.18293	2.76474	0.825334	0.0135851	0.0342028
ENSDARG00000094281	4.05453	3.61145	1.56235	0.0137363	0.0345598
ENSDARG00000075129	18.8621	2.0814	0.570314	0.0137717	0.0346254
ENSDARG00000037178	40.2937	-2.8848	0.880991	0.0138652	0.034837
ENSDARG00000060578	17.9365	2.07967	0.570134	0.0139044	0.0349116
ENSDARG00000097537	53.0051	1.64333	0.43248	0.0139222	0.0349327
ENSDARG00000061207	38.4407	1.80683	0.482819	0.0140594	0.0352531
ENSDARG00000044404	4.15584	3.24066	1.07548	0.0140813	0.0352841
ENSDARG00000102105	23.7097	2.64059	0.776033	0.0141536	0.0354413
ENSDARG00000018765	7.69412	2.40424	0.68457	0.0142	0.0355336
ENSDARG00000101279	25.1999	-3.15161	1.02268	0.0142714	0.0356882
ENSDARG00000079610	516.805	-1.14238	0.28995	0.0143536	0.0358695
ENSDARG00000017180	14.043	2.42308	0.693569	0.0147238	0.0367698
ENSDARG00000103953	317.493	-1.3483	0.3477	0.014754	0.0368204
ENSDARG00000104358	47.6843	-2.42336	0.693897	0.014783	0.0368548
ENSDARG00000002128	10.4211	2.14014	0.593091	0.0147877	0.0368548
ENSDARG00000019715	6.07221	3.36926	1.17721	0.0149582	0.0372547
ENSDARG00000032705	317.177	-1.01687	0.256946	0.0149818	0.0372885
ENSDARG00000043135	7.13598	2.60037	0.764272	0.0151643	0.0377174
ENSDARG00000057691	66.5786	1.45312	0.378594	0.0152366	0.0378717
ENSDARG00000008678	32.9463	1.86876	0.505113	0.0152579	0.0378766
ENSDARG00000020493	12.0659	2.56898	0.752086	0.0152677	0.0378766
ENSDARG00000054501	16.5543	1.69415	0.450626	0.0152692	0.0378766
ENSDARG00000103054	114.162	-2.33644	0.663656	0.0152847	0.0378896
ENSDARG00000033440	68.5158	1.27613	0.32815	0.0153351	0.0379893
ENSDARG00000004587	35.2609	1.61608	0.427112	0.0153767	0.0380669
ENSDARG00000052099	14.2995	2.09382	0.579316	0.015456	0.0382376
ENSDARG00000090286	19.4334	2.20784	0.618476	0.0154746	0.0382582
ENSDARG00000003403	191.654	-1.37702	0.357044	0.0155231	0.0383525
ENSDARG00000104808	12.6407	2.28264	0.645134	0.0155494	0.0383919
ENSDARG00000062361	303.208	-1.14413	0.291912	0.0155873	0.0384362
ENSDARG00000017320	24.1991	2.19004	0.612646	0.015596	0.0384362
ENSDARG00000005612	31.0218	1.70439	0.454436	0.0156056	0.0384362
ENSDARG00000103578	15.9017	2.09529	0.580231	0.0156089	0.0384362
ENSDARG00000055825	50.3108	-1.78027	0.47813	0.0156838	0.0385952
ENSDARG00000067717	16.4374	2.34302	0.667487	0.015707	0.0386265
ENSDARG00000070045	44.4848	1.56693	0.413013	0.0157406	0.0386834
ENSDARG00000016421	4.41109	3.10573	1.00843	0.0158201	0.0388531
ENSDARG00000016754	25.919	1.79786	0.48402	0.0158608	0.038907
ENSDARG00000015592	87.4976	-2.20731	0.619463	0.015863	0.038907
ENSDARG00000036505	161.62	1.63468	0.433962	0.0160432	0.0393228
ENSDARG00000076697	165.758	-1.48684	0.38979	0.0160632	0.0393458
ENSDARG00000039969	79.0256	-1.64596	0.43748	0.0160903	0.0393862
ENSDARG00000076839	18.4868	2.01874	0.555939	0.0161207	0.0394345
ENSDARG00000045549	7.8489	2.50966	0.732398	0.0162163	0.0396422
ENSDARG00000013694	4.77691	2.83997	0.873829	0.0162862	0.0397868
ENSDARG00000040623	121.715	1.41361	0.368778	0.016322	0.0398482
ENSDARG00000006356	21.2305	2.31864	0.661161	0.0164946	0.0402428
ENSDARG00000102167	5.83885	2.61997	0.778265	0.0165617	0.0403801
ENSDARG00000071878	9.72388	2.69026	0.808214	0.0166201	0.0404959
ENSDARG00000076239	10.3708	2.62876	0.782317	0.0166566	0.0405581
ENSDARG00000097753	41.3521	1.76165	0.474376	0.0167053	0.0406498
ENSDARG00000102091	11.6204	2.34421	0.671501	0.0167948	0.0408409
ENSDARG00000014994	9.99659	2.27566	0.646581	0.0168171	0.0408683
ENSDARG00000069089	3.34942	3.44565	1.27739	0.0169877	0.0412559
ENSDARG00000005500	5.94896	3.22767	1.0943	0.0170132	0.0412906
ENSDARG00000004634	235.017	-1.77591	0.479557	0.0170633	0.0413852
ENSDARG00000037846	54.8665	1.306	0.339014	0.0171828	0.0416479
ENSDARG00000096365	2.79557	3.51655	1.38195	0.0172639	NA
ENSDARG00000060199	18.0094	2.29194	0.654229	0.0174006	0.042126
ENSDARG00000070589	4.60242	3.12454	1.03131	0.0174029	0.042126
ENSDARG00000077536	499.701	-1.11478	0.285892	0.0174232	0.0421477
ENSDARG00000045789	116.68	-1.33105	0.346616	0.0175308	0.0423803
ENSDARG00000069801	3060.83	2.0905	0.583765	0.0175818	0.042476
ENSDARG00000039677	43.165	1.9139	0.524896	0.0176096	0.0425154
ENSDARG00000074899	53.5075	1.3507	0.352413	0.0176463	0.0425764
ENSDARG00000031435	67.3511	2.04335	0.568212	0.0177719	0.0428514
ENSDARG00000036754	55.9564	2.00542	0.555531	0.0177981	0.0428856
ENSDARG00000081252	13.7534	2.98164	0.953014	0.0178092	0.0428856
ENSDARG00000060113	28.9623	1.95465	0.539006	0.01795	0.0431965
ENSDARG00000054292	5.39044	3.05819	0.9964	0.0179993	0.0432871
ENSDARG00000090389	12.417	2.23336	0.634867	0.0180207	0.0433105
ENSDARG00000099491	12.3249	2.38619	0.69139	0.0181161	0.0434767
ENSDARG00000099730	296.149	1.09082	0.280034	0.0181204	0.0434767
ENSDARG00000099428	3.33537	3.24291	1.11484	0.0181251	0.0434767
ENSDARG00000008049	5.97504	3.13966	1.04684	0.0182494	0.0437466
ENSDARG00000018853	28.3397	1.95498	0.539809	0.0182689	0.0437652
ENSDARG00000098932	374.695	-0.900699	0.229191	0.0183512	0.0439338
ENSDARG00000002082	98.6349	1.52905	0.405879	0.0183657	0.0439401
ENSDARG00000098801	113.351	-1.67444	0.450315	0.0184163	0.0440093
ENSDARG00000029112	4.80108	3.09846	1.02279	0.0184184	0.0440093
ENSDARG00000092473	22.4128	2.02976	0.565655	0.0186488	0.0445311
ENSDARG00000036967	16.8757	1.99298	0.553346	0.0186776	0.0445714
ENSDARG00000102810	7.3277	2.53452	0.751661	0.0187702	0.0447634
ENSDARG00000105587	8.63306	3.04619	0.994573	0.0187865	0.0447735
ENSDARG00000062096	8.30805	2.94847	0.941339	0.018839	0.0448697
ENSDARG00000075706	466.433	-1.19038	0.308307	0.0188592	0.0448891
ENSDARG00000063195	55.5883	1.38173	0.363071	0.0189461	0.0450411
ENSDARG00000078890	79.7269	-1.47574	0.390782	0.0189543	0.0450411
ENSDARG00000060238	110.805	-1.24825	0.324713	0.0189617	0.0450411
ENSDARG00000069527	19.45	1.99121	0.553391	0.0189717	0.0450411
ENSDARG00000089429	23.8193	2.28162	0.6551	0.0190156	0.0451165
ENSDARG00000003866	19.8123	2.19451	0.623683	0.0190291	0.0451196
ENSDARG00000075709	42.0376	1.67223	0.450708	0.0190641	0.0451737
ENSDARG00000068478	136.095	1.91795	0.529303	0.0190886	0.0452028
ENSDARG00000059001	14.3213	2.20288	0.626978	0.0191502	0.0453197
ENSDARG00000010583	154.217	-1.24369	0.32366	0.0191785	0.0453576
ENSDARG00000074720	4.78332	3.30382	1.17322	0.0193511	0.0457366
ENSDARG00000075445	34.003	2.00315	0.558264	0.0193711	0.0457549
ENSDARG00000086879	4.83759	2.99669	0.971844	0.0196465	0.0463757
ENSDARG00000012682	63.7585	1.52672	0.407119	0.0197134	0.0465041
ENSDARG00000038156	10.6092	2.43961	0.717165	0.0197834	0.0466396
ENSDARG00000094041	162.985	1.89208	0.522206	0.0198011	0.0466516
ENSDARG00000096003	83.5697	1.79438	0.490841	0.0199866	0.0470312
ENSDARG00000105279	5.75814	2.70507	0.828891	0.0199876	0.0470312
ENSDARG00000017910	4.29816	3.08868	1.02795	0.0200871	0.0472353
ENSDARG00000007663	141.993	1.60621	0.431992	0.0201589	0.0473739
ENSDARG00000013931	180.416	1.15008	0.298396	0.0202092	0.0474621
ENSDARG00000062401	7.86037	2.58828	0.778993	0.0202242	0.0474674
ENSDARG00000015971	23.3254	2.16853	0.617504	0.0202659	0.0475351
ENSDARG00000075892	132.509	-1.30162	0.341535	0.0203825	0.0477783
ENSDARG00000086826	30.429	2.20649	0.631614	0.0204817	0.0479805
ENSDARG00000003151	304.319	1.91826	0.532219	0.0205196	0.0480389
ENSDARG00000022424	8.88134	2.51688	0.750844	0.020664	0.0483464
ENSDARG00000042660	384.177	1.33117	0.350415	0.0206775	0.0483476
ENSDARG00000056165	92.1599	-2.22238	0.638005	0.0207438	0.048472
ENSDARG00000015482	8.45252	2.29999	0.666642	0.0207771	0.0485191
ENSDARG00000052856	610.695	-1.137	0.29534	0.0208413	0.0486385
ENSDARG00000033327	90.3403	-1.95607	0.545636	0.0209381	0.0488335
ENSDARG00000027750	7.43354	2.63277	0.800637	0.0209606	0.0488554
ENSDARG00000016280	385.007	-0.986316	0.254097	0.0209871	0.0488557
ENSDARG00000087402	270.656	-1.08001	0.279675	0.0209871	0.0488557
ENSDARG00000015931	22.751	1.94905	0.543417	0.0210083	0.0488744
ENSDARG00000044073	8.6418	3.46591	1.59659	0.0210231	0.048878
ENSDARG00000006642	5.03332	3.07472	1.02573	0.0210883	0.0489989
ENSDARG00000002600	60.9812	-1.81518	0.499505	0.0211154	0.0490312
ENSDARG00000001817	50.7222	-1.99403	0.558823	0.021132	0.0490389
ENSDARG00000020228	370.364	-1.40284	0.372005	0.0211908	0.0491446
ENSDARG00000090788	21.9569	1.55871	0.419082	0.0213388	0.0494568
ENSDARG00000062244	259.122	-0.934146	0.240324	0.021371	0.0495006
ENSDARG00000018312	5.01283	3.12432	1.06006	0.0215559	0.0498976
ENSDARG00000006003	5.52638	3.11452	1.05436	0.0216592	0.0501055
ENSDARG00000092798	116.589	1.39573	0.370478	0.0216851	0.0501341
ENSDARG00000078703	34.9691	-2.05358	0.5804	0.0217125	0.0501661
ENSDARG00000078902	108.592	-1.4189	0.377581	0.0218847	0.0505325
ENSDARG00000068323	14.4018	2.56713	0.775773	0.0219174	0.0505765
ENSDARG00000041243	30.3516	1.23813	0.32497	0.0219925	0.0506887
ENSDARG00000062973	59.3277	1.63459	0.44344	0.0219934	0.0506887
ENSDARG00000007276	109.448	2.17085	0.622517	0.0220731	0.0508178
ENSDARG00000014986	69.239	1.30802	0.3452	0.0220768	0.0508178
ENSDARG00000101776	6.16416	2.58228	0.783132	0.0222018	0.0510462
ENSDARG00000041137	24.5691	1.80729	0.498763	0.0222036	0.0510462
ENSDARG00000075188	101.625	-2.13427	0.610017	0.0223362	0.0513193
ENSDARG00000103644	8.52471	2.31412	0.676341	0.0224849	0.0516289
ENSDARG00000089805	8.80579	2.64925	0.813349	0.0225168	0.0516701
ENSDARG00000062379	15.4542	2.06948	0.588052	0.0227575	0.0521784
ENSDARG00000100013	351.294	-0.873152	0.224929	0.0227664	0.0521784
ENSDARG00000098816	59.4159	-2.84653	0.908993	0.0230599	0.0528183
ENSDARG00000053829	14.2375	2.14634	0.616166	0.0231966	0.0530986
ENSDARG00000013938	34.6065	2.12101	0.60725	0.0232609	0.053213
ENSDARG00000025522	87.6608	1.46462	0.393047	0.023405	0.0535095
ENSDARG00000006604	8.63031	2.88627	0.931178	0.0234278	0.0535287
ENSDARG00000097341	4.05458	3.21997	1.14388	0.0237027	0.0541233
ENSDARG00000090548	6.55074	2.34171	0.689973	0.0237191	0.0541275
ENSDARG00000098130	9.93663	2.43705	0.727667	0.0237759	0.0542218
ENSDARG00000055969	4.06246	3.22743	1.15052	0.0237897	0.0542218
ENSDARG00000078075	17.6064	2.04966	0.583758	0.0241109	0.05492
ENSDARG00000010267	30.228	1.69049	0.464078	0.024143	0.0549595
ENSDARG00000012671	34.5572	1.9224	0.540239	0.0242205	0.0551019
ENSDARG00000052859	13.8533	2.35238	0.695393	0.0242413	0.0551156
ENSDARG00000102320	3.17671	3.15254	1.09748	0.0242975	0.0552093
ENSDARG00000101999	8.21477	2.35193	0.695491	0.0243533	0.0553023
ENSDARG00000043970	22.4799	1.78152	0.493746	0.0243694	0.055305
ENSDARG00000057042	3.56733	3.44785	1.47256	0.0244087	0.0553603
ENSDARG00000062794	38.7891	1.85659	0.518738	0.024553	0.0556405
ENSDARG00000019338	13.5644	2.39522	0.713015	0.0245623	0.0556405
ENSDARG00000006266	51.9153	1.72653	0.476245	0.0245889	0.0556668
ENSDARG00000056924	14.8197	2.18503	0.633211	0.024637	0.0557417
ENSDARG00000022891	47.8818	1.34253	0.357998	0.0247432	0.0559477
ENSDARG00000063354	11.0415	2.30819	0.67962	0.0247785	0.0559935
ENSDARG00000078781	101.964	1.50756	0.407764	0.0248398	0.0560977
ENSDARG00000002271	31.9485	2.0394	0.581674	0.0249214	0.0562477
ENSDARG00000034473	11.3121	2.04813	0.584928	0.0250277	0.0564531
ENSDARG00000004451	54.9211	-2.16596	0.627297	0.0251487	0.0566916
ENSDARG00000042927	4.7385	2.78998	0.889494	0.0253097	0.0570199
ENSDARG00000028067	9.75799	2.57534	0.791183	0.0257839	0.058053
ENSDARG00000052873	8.22664	2.61336	0.80823	0.0258739	0.0582202
ENSDARG00000007359	7.05157	2.36401	0.703936	0.0258948	0.0582318
ENSDARG00000069589	9.73693	2.45946	0.742473	0.0259273	0.0582696
ENSDARG00000054749	5.07528	2.59913	0.802177	0.0259649	0.0583187
ENSDARG00000059583	10.9922	2.29238	0.676459	0.0260573	0.0584908
ENSDARG00000035660	34.4705	-2.51088	0.764353	0.0260889	0.0585263
ENSDARG00000099667	7.02134	2.44438	0.737094	0.0262454	0.0588419
ENSDARG00000105551	12.9928	2.55801	0.785197	0.0263265	0.0589879
ENSDARG00000038099	35.3538	1.98775	0.566232	0.0263834	0.0590798
ENSDARG00000035869	55.4155	1.74986	0.486441	0.0264987	0.0593021
ENSDARG00000101963	3.22455	3.4023	1.39065	0.0266051	0.0595008
ENSDARG00000100823	51.3002	1.42802	0.385432	0.0266196	0.0595008
ENSDARG00000078416	96.459	-1.35156	0.362503	0.0266565	0.0595474
ENSDARG00000039757	5.09134	2.83589	0.918394	0.0267513	0.059723
ENSDARG00000076376	87.8206	-2.66324	0.833775	0.0268092	0.0598163
ENSDARG00000054588	3.60504	3.09592	1.07347	0.0268527	0.0598774
ENSDARG00000058419	140.822	1.36186	0.36579	0.0268854	0.0599142
ENSDARG00000019707	100.222	-1.60363	0.440108	0.0269635	0.0600522
ENSDARG00000039392	527.044	-1.2769	0.340739	0.0269832	0.0600599
ENSDARG00000104225	30.1523	2.02206	0.579351	0.0270626	0.0602005
ENSDARG00000096631	3.11702	3.36164	1.32571	0.0271715	0.0604064
ENSDARG00000062139	70.7651	1.24318	0.33111	0.0272439	0.060531
ENSDARG00000020176	49.2323	-2.64626	0.82758	0.0273443	0.0607179
ENSDARG00000029783	44.6757	1.47104	0.399466	0.0275298	0.061093
ENSDARG00000057973	5.5714	2.72279	0.864739	0.027674	0.0613764
ENSDARG00000068572	41.9805	-1.69984	0.471828	0.0277616	0.0615054
ENSDARG00000000189	12.3348	2.1161	0.614151	0.0277654	0.0615054
ENSDARG00000100588	3393.37	1.09415	0.289064	0.0281497	0.0622717
ENSDARG00000070674	30.5839	1.76857	0.494783	0.0281575	0.0622717
ENSDARG00000035515	6.45295	2.79084	0.900257	0.0281617	0.0622717
ENSDARG00000056557	46.8945	1.2932	0.346559	0.0281921	0.0623018
ENSDARG00000076752	47.8084	-2.97435	1.00335	0.0284863	0.0629143
ENSDARG00000096920	189.377	-1.40575	0.380569	0.0285726	0.0630674
ENSDARG00000105018	31.0648	1.96075	0.560671	0.0287727	0.0634713
ENSDARG00000077736	78.842	-1.42283	0.385969	0.0287962	0.0634853
ENSDARG00000010519	428.413	-1.12725	0.298967	0.0288986	0.0636731
ENSDARG00000063133	294.062	-0.81583	0.212982	0.0290796	0.0640338
ENSDARG00000073917	6.20761	2.53736	0.784187	0.0292914	0.064462
ENSDARG00000103683	63.1435	-1.5388	0.422425	0.0294296	0.0647276
ENSDARG00000038359	14.1242	1.86331	0.52853	0.0296921	0.0652662
ENSDARG00000055350	76.3134	-1.7442	0.488873	0.0298288	0.0655279
ENSDARG00000068256	9.88079	1.99775	0.575518	0.0300078	0.0658821
ENSDARG00000077372	51.8452	1.98638	0.571808	0.0302043	0.0662742
ENSDARG00000044753	4.00871	2.87266	0.951987	0.030387	0.0666357
ENSDARG00000087205	77.6878	-1.71804	0.481028	0.0304577	0.0667457
ENSDARG00000079348	23.0537	-3.0504	1.06152	0.0304732	0.0667457
ENSDARG00000063910	35.6925	1.75693	0.493913	0.03051	0.0667869
ENSDARG00000032535	6.39978	2.45778	0.753056	0.0305536	0.0668427
ENSDARG00000045661	7.13992	2.91963	0.979627	0.0305881	0.066851
ENSDARG00000055763	49.8983	1.6485	0.458555	0.0305934	0.066851
ENSDARG00000007912	47.9179	-2.75079	0.8881	0.030629	0.0668893
ENSDARG00000003290	47.2316	-1.85443	0.526801	0.0306485	0.0668924
ENSDARG00000069521	15.511	1.97497	0.568514	0.0306881	0.0669395
ENSDARG00000055101	58.158	1.7297	0.485348	0.0308713	0.0672747
ENSDARG00000051798	255.645	-1.0427	0.276303	0.0308781	0.0672747
ENSDARG00000010878	5.98624	2.81318	0.921429	0.0309169	0.0673196
ENSDARG00000038030	31.777	1.98839	0.573634	0.0309541	0.0673611
ENSDARG00000038476	4.37141	2.75631	0.892123	0.0310138	0.0674513
ENSDARG00000002509	2.87175	3.28338	1.26782	0.0310987	0.0675963
ENSDARG00000006065	40.4832	1.5102	0.41515	0.0311221	0.0676076
ENSDARG00000105731	2.21323	3.36763	1.41941	0.0311926	NA
ENSDARG00000027547	16.1692	2.23188	0.663556	0.0311928	0.0677214
ENSDARG00000088293	145.741	-1.49622	0.410955	0.0313034	0.0679217
ENSDARG00000078686	326.437	-1.02565	0.271853	0.0314619	0.0682257
ENSDARG00000024209	19.1166	2.11167	0.618905	0.0314904	0.0682276
ENSDARG00000092159	13.0108	2.42191	0.740109	0.0314996	0.0682276
ENSDARG00000101080	58.5287	1.20824	0.324205	0.0315683	0.0683366
ENSDARG00000035679	32.6768	1.66321	0.46464	0.0318	0.068798
ENSDARG00000034768	110.487	-1.10088	0.293456	0.0319677	0.0691203
ENSDARG00000103322	30.3708	1.87925	0.537184	0.0320898	0.0692877
ENSDARG00000028106	14.0312	2.01463	0.584649	0.0320978	0.0692877
ENSDARG00000078359	3.21945	3.20709	1.19532	0.0321012	0.0692877
ENSDARG00000078172	41.7355	-3.091	1.10288	0.0328928	0.070955
ENSDARG00000027353	83.0802	-1.85501	0.530275	0.0331984	0.0715603
ENSDARG00000041411	9.73547	2.40065	0.734866	0.033212	0.0715603
ENSDARG00000028559	11.1196	2.45181	0.756568	0.0332717	0.0716473
ENSDARG00000020841	16.1295	2.24758	0.673453	0.0333194	0.0717082
ENSDARG00000060306	54.612	1.453	0.399366	0.0333793	0.0717956
ENSDARG00000019063	13.6786	2.18076	0.648488	0.0337689	0.0725655
ENSDARG00000103511	11.1705	1.985	0.576464	0.0337765	0.0725655
ENSDARG00000045935	4.19482	3.32649	1.36859	0.0337994	0.0725727
ENSDARG00000059116	63.0229	1.71991	0.485651	0.0340011	0.0729636
ENSDARG00000034434	193.157	1.07388	0.287	0.0340626	0.0730249
ENSDARG00000057921	57.5169	-1.69375	0.47707	0.0340691	0.0730249
ENSDARG00000045092	6.73398	2.72524	0.88561	0.034108	0.0730518
ENSDARG00000044246	82.8767	-2.27591	0.686028	0.0341385	0.0730518
ENSDARG00000062630	78.1816	-2.01482	0.587656	0.0341408	0.0730518
ENSDARG00000043279	5.70995	2.50865	0.783718	0.0343766	0.073514
ENSDARG00000074471	19.5676	2.01022	0.58641	0.0344348	0.0735959
ENSDARG00000096721	38.0554	1.89596	0.546277	0.0346803	0.074078
ENSDARG00000011998	48.0643	1.21525	0.328493	0.0348522	0.0743916
ENSDARG00000101306	11.8098	2.18151	0.650563	0.0348673	0.0743916
ENSDARG00000011819	17.3037	2.04244	0.598735	0.0348993	0.074417
ENSDARG00000062745	8.04843	2.426	0.749212	0.0350163	0.0746236
ENSDARG00000086927	37.7527	-2.4851	0.774836	0.0350622	0.0746784
ENSDARG00000036944	145.098	-1.90099	0.548694	0.0352121	0.0749546
ENSDARG00000042777	47.5468	1.85914	0.534359	0.0353821	0.0752733
ENSDARG00000090170	166.616	-1.26081	0.342421	0.035462	0.0753999
ENSDARG00000043511	13.0374	2.09213	0.617952	0.0355573	0.0755593
ENSDARG00000069461	22.7373	1.93503	0.561284	0.0357122	0.0758449
ENSDARG00000015990	46.1907	1.59634	0.446979	0.0358053	0.0759649
ENSDARG00000075193	43.6295	-2.33863	0.714286	0.0358097	0.0759649
ENSDARG00000043713	30.3244	1.8055	0.516476	0.0358411	0.075988
ENSDARG00000030441	25.8565	1.78983	0.511186	0.0358817	0.0760306
ENSDARG00000086098	15.0622	2.19895	0.659713	0.0363972	0.0770788
ENSDARG00000059057	23.1015	2.10185	0.622869	0.0364485	0.0771433
ENSDARG00000058444	19.2816	1.9861	0.580788	0.0367132	0.0776593
ENSDARG00000090142	39.3412	-2.31681	0.707264	0.0368627	0.077931
ENSDARG00000102883	410.805	-0.984227	0.263076	0.0369026	0.0779612
ENSDARG00000098344	25.5562	2.09777	0.622022	0.036919	0.0779612
ENSDARG00000001785	57.0122	-1.61324	0.453574	0.0370001	0.078088
ENSDARG00000029600	7.47073	2.29027	0.696786	0.0370213	0.0780883
ENSDARG00000027182	105.355	1.47318	0.408791	0.0371151	0.0782414
ENSDARG00000100620	110.567	-1.37066	0.376975	0.037254	0.0784896
ENSDARG00000042854	8.16765	2.35733	0.724954	0.0374336	0.0788233
ENSDARG00000102684	8.60674	2.17667	0.652887	0.037547	0.0790171
ENSDARG00000029170	43.072	1.82387	0.524905	0.0377587	0.0794176
ENSDARG00000053091	72.7522	1.62978	0.459837	0.0379275	0.0797274
ENSDARG00000100363	7.19312	2.19358	0.660198	0.0380496	0.0799386
ENSDARG00000077037	120.247	-1.46727	0.407736	0.038131	0.0800642
ENSDARG00000079363	76.5542	-2.40811	0.747945	0.0382885	0.0803495
ENSDARG00000103288	48.0204	1.88627	0.54744	0.0384871	0.0807205
ENSDARG00000003293	47.7396	-2.21396	0.668906	0.0385353	0.080776
ENSDARG00000099002	73.1239	-1.88844	0.54829	0.0385653	0.0807931
ENSDARG00000091609	45.0761	2.81394	0.946524	0.0386619	0.0809498
ENSDARG00000004597	76.725	1.62576	0.459979	0.0395521	0.0827668
ENSDARG00000098612	103.856	-1.75701	0.504203	0.0398687	0.0833647
ENSDARG00000102056	90.8377	-1.28828	0.353589	0.0398828	0.0833647
ENSDARG00000070723	37.1281	1.42185	0.394823	0.0399433	0.083444
ENSDARG00000102070	12.1784	2.27087	0.693912	0.0400376	0.0835939
ENSDARG00000022918	6.04587	2.62413	0.85038	0.0400812	0.0836379
ENSDARG00000003994	16.7617	2.3604	0.731401	0.0403665	0.0841858
ENSDARG00000004581	253.307	-1.74174	0.499624	0.040498	0.0844125
ENSDARG00000074985	19.2967	2.14092	0.643629	0.0406552	0.0846927
ENSDARG00000002720	22.331	1.9842	0.585075	0.0407047	0.0847481
ENSDARG00000040666	31.6258	1.7402	0.499403	0.0408119	0.0849235
ENSDARG00000043416	14.534	1.81664	0.525832	0.0409906	0.0852151
ENSDARG00000069090	26.2832	2.038	0.605217	0.040998	0.0852151
ENSDARG00000039882	7.99541	2.60543	0.843467	0.0410732	0.0853235
ENSDARG00000092780	4.98788	2.67554	0.878865	0.0412317	0.0856048
ENSDARG00000074771	2.76472	3.27785	1.39455	0.041713	NA
ENSDARG00000040736	14.0862	2.57692	0.831151	0.0417508	0.086634
ENSDARG00000069111	104.674	-1.6168	0.459126	0.0419901	0.087082
ENSDARG00000077060	197.109	-0.966099	0.260279	0.0420329	0.0871218
ENSDARG00000020187	6.19444	2.54558	0.817019	0.0421186	0.0872508
ENSDARG00000005941	58.4555	1.46704	0.410803	0.042299	0.0875756
ENSDARG00000004635	37.706	1.31456	0.363253	0.0424989	0.0879402
ENSDARG00000075467	7.07023	2.94003	1.03779	0.0428418	0.0886004
ENSDARG00000057394	19.5313	1.53134	0.432126	0.0431937	0.0892782
ENSDARG00000037358	19.0479	1.96929	0.58264	0.0432883	0.0894238
ENSDARG00000023659	133.223	-1.58835	0.450984	0.0435026	0.0898164
ENSDARG00000002601	61.0779	-2.56578	0.829497	0.0435352	0.0898338
ENSDARG00000062330	183.74	-1.073	0.291798	0.0438564	0.0904155
ENSDARG00000040121	9.0712	2.57436	0.834308	0.0438659	0.0904155
ENSDARG00000074759	65.4078	0.958089	0.258818	0.0439832	0.0906069
ENSDARG00000033364	8.79792	2.26805	0.698844	0.0440185	0.0906292
ENSDARG00000021225	442.92	-1.18176	0.323993	0.0441494	0.0908482
ENSDARG00000012848	30.1131	1.99915	0.594793	0.0443245	0.0911579
ENSDARG00000043436	3.70997	3.09832	1.16878	0.0446133	0.0916435
ENSDARG00000008674	47.3038	-2.59346	0.845252	0.0446581	0.0916435
ENSDARG00000069139	5.4217	2.847	0.983729	0.0446662	0.0916435
ENSDARG00000018856	48.7108	1.72128	0.496512	0.0446794	0.0916435
ENSDARG00000044565	89.3058	1.56522	0.444305	0.0446843	0.0916435
ENSDARG00000087330	9.21782	2.28475	0.706761	0.0447235	0.0916732
ENSDARG00000061909	21.3244	1.9418	0.574616	0.045113	0.0924206
ENSDARG00000019941	4.13187	2.75933	0.934032	0.0453484	0.0928245
ENSDARG00000035175	164.89	1.12832	0.308733	0.0453603	0.0928245
ENSDARG00000096380	2.85804	3.24602	1.54864	0.0454041	0.0928563
ENSDARG00000056156	6.99261	2.56054	0.83075	0.0454259	0.0928563
ENSDARG00000074271	11.9056	2.45604	0.782082	0.0455231	0.0930037
ENSDARG00000058996	5.17545	2.58335	0.842262	0.0456296	0.0931698
ENSDARG00000089717	2.73892	3.26271	1.47605	0.0456432	NA
ENSDARG00000103505	23.1344	1.806	0.526882	0.0458633	0.0935955
ENSDARG00000086150	6.48264	2.19861	0.673668	0.0461137	0.0940547
ENSDARG00000054570	81.3105	1.50335	0.425234	0.0461903	0.094159
ENSDARG00000092998	7.12298	2.33911	0.731923	0.04627	0.0942697
ENSDARG00000033768	4.30552	2.73099	0.920696	0.0463644	0.0943895
ENSDARG00000090149	22.2279	-2.92127	1.03698	0.0463797	0.0943895
ENSDARG00000043465	32.0509	1.83725	0.538717	0.046745	0.0950458
ENSDARG00000070844	15.4537	2.10713	0.638485	0.0467535	0.0950458
ENSDARG00000087693	8.45297	2.43523	0.774851	0.0467879	0.0950635
ENSDARG00000014634	25.1855	1.92942	0.572162	0.0470794	0.0956035
ENSDARG00000056004	13.2765	2.43366	0.774897	0.0472375	0.095777
ENSDARG00000061989	21.6246	2.27587	0.706717	0.0472392	0.095777
ENSDARG00000093120	64.1435	-1.70319	0.492526	0.0472447	0.095777
ENSDARG00000018782	138.62	-1.34371	0.375157	0.0472683	0.095777
ENSDARG00000019332	14.4464	2.24062	0.692275	0.0473059	0.0958009
ENSDARG00000078001	34.3113	-2.96153	1.06878	0.0473893	0.0959175
ENSDARG00000008480	4.16685	2.66871	0.889488	0.0474378	0.0959612
ENSDARG00000039456	105.9	-1.15424	0.317443	0.0474627	0.0959612
ENSDARG00000029248	97.9632	1.3143	0.366319	0.0478117	0.0965911
ENSDARG00000031649	9.12774	2.20921	0.680198	0.0478264	0.0965911
ENSDARG00000103145	28.9967	1.46474	0.41413	0.0482168	0.0973266
ENSDARG00000097205	93.7875	1.44998	0.40941	0.0482584	0.0973575
ENSDARG00000095908	149.916	1.79204	0.524267	0.0483786	0.0975468
ENSDARG00000060994	191.465	-1.33878	0.374298	0.0484375	0.0976126
ENSDARG00000016721	91.3678	1.31169	0.365965	0.0486233	0.0979336
ENSDARG00000074790	25.9439	1.61926	0.465225	0.0486552	0.0979447
ENSDARG00000098810	84.7391	1.56329	0.44664	0.0487249	0.0980176
ENSDARG00000103002	19.9541	1.98314	0.593682	0.0487483	0.0980176
ENSDARG00000036069	4.35919	2.78314	0.956412	0.0487708	0.0980176
ENSDARG00000079783	31.6436	1.87569	0.554784	0.0492175	0.0988617
ENSDARG00000041397	11.6252	2.06785	0.626311	0.0492977	0.098966
ENSDARG00000076689	57.4968	1.54586	0.441306	0.0493228	0.098966
ENSDARG00000018742	41.0293	1.49315	0.42408	0.0493668	0.0990007
ENSDARG00000017454	73.6542	1.35131	0.378807	0.0494611	0.0991362
ENSDARG00000104782	204.387	1.34749	0.377767	0.0497418	0.0996448
ENSDARG00000104848	34.3356	1.80644	0.530587	0.0497938	0.0996951
ENSDARG00000028688	6.1524	3.03053	1.13294	0.04999	0.0996951
ENSDARG00000101074	59.6975	1.27069	0.354023	0.04999	0.0996951
ENSDARG00000042796	28.8784	1.39389	0.392757	0.0501282	0.100936
ENSDARG00000105215	56.5552	-1.88498	0.559194	0.0501217	0.100936
ENSDARG00000020811	64.3987	-1.9782	0.593581	0.0501219	0.100938
ENSDARG00000041887	190.753	-1.15977	0.32058	0.0501223	0.10094
ENSDARG00000009031	125.807	-1.38741	0.390998	0.0501228	0.100944
ENSDARG00000100657	2.94283	3.1334	1.24182	0.0501238	0.100951
ENSDARG00000043722	20.5704	2.10747	0.644139	0.0501244	0.100955
ENSDARG00000008551	76.0671	-1.21584	0.337975	0.0501246	0.100955
ENSDARG00000043646	82.7997	-1.40252	0.396264	0.0501248	0.100956
ENSDARG00000101135	6.67075	2.92611	1.05766	0.0501252	0.100958
ENSDARG00000008867	59.276	1.40379	0.396767	0.0501252	0.100958
ENSDARG00000056680	13.5749	2.10352	0.642972	0.0501253	0.100959
ENSDARG00000019438	22.4548	2.12854	0.653141	0.0501259	0.100963
ENSDARG00000089124	17.4964	2.68221	0.907462	0.0501268	0.100969
ENSDARG00000031911	64.8134	-1.72179	0.503143	0.0501269	0.100969
ENSDARG00000012892	13.1322	1.85953	0.55211	0.0501274	0.100973
ENSDARG00000088091	164.641	1.82694	0.540936	0.050129	0.100984
ENSDARG00000023967	11.4336	2.15226	0.664092	0.0501291	0.100985
ENSDARG00000045306	6.08202	2.5428	0.837054	0.0501295	0.100987
ENSDARG00000027986	4.37096	3.01142	1.13099	0.0501297	0.100988
ENSDARG00000039901	437.341	-0.807841	0.219812	0.0501309	0.100997
ENSDARG00000017675	46.147	1.35552	0.382776	0.0501312	0.100998
ENSDARG00000014875	199.33	1.7412	0.511291	0.0501312	0.100998
ENSDARG00000017314	513.95	1.87016	0.557431	0.0501315	0.100999
ENSDARG00000036092	17.0168	1.7236	0.505358	0.0501319	0.101002
ENSDARG00000042296	16.8988	1.97866	0.597867	0.0501321	0.101003
ENSDARG00000021985	6.22604	2.19094	0.681248	0.0501322	0.101003
ENSDARG00000076888	115.294	-1.61375	0.467684	0.0501323	0.101003
ENSDARG00000020621	49.5813	1.62033	0.470071	0.0501328	0.101007
ENSDARG00000059711	13.4036	1.85155	0.551388	0.0501335	0.101011
ENSDARG00000079202	18.2659	1.47938	0.42325	0.0501336	0.101011
ENSDARG00000070981	932.243	-0.727937	0.197747	0.050134	0.101014
ENSDARG00000032765	148.291	1.22985	0.344156	0.0501343	0.101016
ENSDARG00000098367	17.1722	1.70815	0.500928	0.0501351	0.101021
ENSDARG00000018270	11.5919	1.96163	0.593636	0.0501378	0.101041
ENSDARG00000008377	57.7155	1.50785	0.433781	0.0501383	0.101044
ENSDARG00000045416	4.18651	2.67118	0.911029	0.0501384	0.101045
ENSDARG00000039915	9.45252	2.93623	1.08259	0.0501387	0.101046
ENSDARG00000001888	182.349	-1.62362	0.472874	0.0501389	0.101047
ENSDARG00000101690	4.47022	2.56673	0.855982	0.0501393	0.101049
ENSDARG00000077715	39.3188	-2.53224	0.838816	0.0501397	0.101052
ENSDARG00000105142	9.89824	2.2056	0.69086	0.0501397	0.101052
ENSDARG00000035505	8.66885	2.4782	0.812492	0.05014	0.101052
ENSDARG00000037932	7.35479	2.50597	0.826005	0.05014	0.101052
ENSDARG00000059247	6.8006	2.70254	0.930066	0.05014	0.101052
ENSDARG00000078435	4.43269	3.02642	1.16138	0.0501402	0.101053
ENSDARG00000022340	7.12583	2.16213	0.673489	0.0501409	0.101058
ENSDARG00000017255	5.17128	2.93135	1.08327	0.0501422	0.101067
ENSDARG00000042030	14.5502	1.69803	0.499655	0.0501428	0.10107
ENSDARG00000075949	16.1865	2.06318	0.63476	0.050143	0.101072
ENSDARG00000004261	86.1459	1.59385	0.463928	0.0501435	0.101074
ENSDARG00000006624	14.4232	1.83491	0.549117	0.0501448	0.101083
ENSDARG00000057427	80.9698	-1.46447	0.421011	0.0501449	0.101083
ENSDARG00000032849	41.8388	1.71292	0.505493	0.0501449	0.101083
ENSDARG00000071015	341.213	-1.03096	0.285904	0.050145	0.101083
ENSDARG00000082850	133.738	1.63525	0.478518	0.0501451	0.101084
ENSDARG00000007275	35.2681	1.83823	0.550461	0.0501453	0.101084
ENSDARG00000037713	9.24873	2.15792	0.673765	0.0501454	0.101085
ENSDARG00000021812	17.0725	1.80805	0.539747	0.0501461	0.101089
ENSDARG00000028614	51.4012	1.72504	0.510145	0.0501463	0.10109
ENSDARG00000037556	4.83689	2.48865	0.821815	0.0501468	0.101094
ENSDARG00000097848	25.2465	1.7415	0.516212	0.0501471	0.101095
ENSDARG00000008239	3.59558	3.05187	1.1989	0.0501472	0.101095
ENSDARG00000097178	2.74591	3.1722	1.41004	0.0501479	NA
ENSDARG00000035557	100.081	1.58608	0.462502	0.0501483	0.101102
ENSDARG00000062385	114.08	1.17426	0.329885	0.0501504	0.101118
ENSDARG00000001057	258.793	1.23905	0.350003	0.0501509	0.101121
ENSDARG00000098588	9.39329	2.66288	0.916568	0.0501515	0.101125
ENSDARG00000010194	63.3924	1.22977	0.347277	0.0501518	0.101126
ENSDARG00000007901	43.0919	1.32547	0.377448	0.0501519	0.101127
ENSDARG00000055154	198.146	-1.39087	0.398492	0.050152	0.101127
ENSDARG00000076815	1695.21	-0.606838	0.165591	0.0501531	0.101134
ENSDARG00000054530	60.3234	1.53253	0.445765	0.0501541	0.101141
ENSDARG00000074506	5.79427	2.70111	0.940794	0.0501543	0.101141
ENSDARG00000063255	53.0557	-1.60203	0.469925	0.0501562	0.101155
ENSDARG00000070495	17.4826	-2.89562	1.07393	0.0501576	0.101165
ENSDARG00000044632	30.4388	-2.34883	0.762192	0.0501585	0.10117
ENSDARG00000029533	1666.25	1.4927	0.433613	0.0501596	0.101178
ENSDARG00000074023	10.7198	1.97299	0.605773	0.0501597	0.101178
ENSDARG00000078324	49.2812	-1.73668	0.518225	0.0501604	0.101183
ENSDARG00000095224	8.43375	2.28852	0.736239	0.0501609	0.101185
ENSDARG00000036500	24.5444	1.65974	0.491106	0.0501609	0.101185
ENSDARG00000101840	334.488	-1.37507	0.395159	0.0501611	0.101186
ENSDARG00000039966	30.3744	1.92406	0.587667	0.0501616	0.101189
ENSDARG00000042613	6.34935	2.43076	0.80236	0.0501619	0.101191
ENSDARG00000025338	34.8512	1.81129	0.545722	0.0501621	0.101191
ENSDARG00000036359	7.4384	2.19704	0.69719	0.0501622	0.101191
ENSDARG00000033140	379.79	-1.2692	0.361554	0.050163	0.101197
ENSDARG00000086535	15.8005	-2.91736	1.09767	0.0501633	0.101198
ENSDARG00000012215	4.51458	2.37556	0.77699	0.0501634	0.101199
ENSDARG00000036456	419.916	-1.39948	0.403607	0.0501637	0.1012
ENSDARG00000102128	210.638	-1.15414	0.325789	0.0501638	0.1012
ENSDARG00000078411	7.20986	2.59546	0.887841	0.050164	0.101201
ENSDARG00000059897	61.5774	-1.73389	0.518247	0.0501642	0.101202
ENSDARG00000034007	55.5881	1.35019	0.38782	0.050165	0.101207
ENSDARG00000069977	59.5536	1.40469	0.405681	0.0501656	0.101211
ENSDARG00000070849	524.344	1.80735	0.545477	0.0501663	0.101215
ENSDARG00000063474	82.3928	1.23985	0.353076	0.0501678	0.101225
ENSDARG00000078522	39.2152	1.66726	0.495588	0.0501683	0.101228
ENSDARG00000099572	78.3512	1.72489	0.516261	0.0501689	0.101233
ENSDARG00000016080	15.5728	2.06274	0.644574	0.0501695	0.101236
ENSDARG00000063559	9.92531	2.39271	0.788295	0.0501698	0.101238
ENSDARG00000092807	8841.72	1.78178	0.537197	0.0501702	0.10124
ENSDARG00000045248	1851.91	1.67032	0.497182	0.0501704	0.10124
ENSDARG00000070076	5.34029	2.42946	0.806355	0.0501706	0.101242
ENSDARG00000021120	6.03971	2.35635	0.77239	0.0501723	0.101253
ENSDARG00000028857	59.1955	-1.8254	0.554075	0.0501731	0.101259
ENSDARG00000035188	67.593	-1.84795	0.562567	0.0501735	0.10126
ENSDARG00000098398	3.42993	2.99074	1.17842	0.0501739	0.101262
ENSDARG00000045888	42.4355	1.59611	0.472137	0.0501745	0.101266
ENSDARG00000097328	53.2481	-2.14478	0.680102	0.0501746	0.101266
ENSDARG00000073732	311.486	-0.948362	0.265361	0.0501757	0.101274
ENSDARG00000010965	98.7215	1.25705	0.359931	0.0501767	0.10128
ENSDARG00000006467	44.1415	-2.63938	0.921459	0.0501774	0.101285
ENSDARG00000062972	303.02	-1.18439	0.337236	0.0501779	0.101288
ENSDARG00000016404	48.2335	-1.93034	0.595191	0.050178	0.101288
ENSDARG00000054155	41.6474	1.62608	0.483573	0.0501788	0.101293
ENSDARG00000057026	298.619	1.25931	0.361014	0.050179	0.101293
ENSDARG00000103739	305.245	-1.07234	0.302877	0.050179	0.101293
ENSDARG00000013928	16.258	1.76635	0.533921	0.0501791	0.101293
ENSDARG00000027423	97.6348	-1.92241	0.592576	0.0501795	0.101295
ENSDARG00000052654	67.8964	-1.75696	0.531053	0.0501814	0.101308
ENSDARG00000014329	211.29	0.900782	0.252078	0.0501824	0.101315
ENSDARG00000029885	24.3225	1.92813	0.595784	0.0501829	0.101317
ENSDARG00000057918	71.4616	1.28845	0.371135	0.0501841	0.101325
ENSDARG00000097478	364.148	0.875041	0.244759	0.0501846	0.101329
ENSDARG00000079483	205.392	-1.2112	0.346728	0.0501854	0.101333
ENSDARG00000078189	1.8994	3.0949	1.50404	0.0501875	NA
ENSDARG00000045733	17.0411	1.71983	0.519414	0.0501891	0.101359
ENSDARG00000070161	71.7801	1.52763	0.451547	0.0501892	0.101359
ENSDARG00000006773	15.5221	1.86409	0.573335	0.0501904	0.101367
ENSDARG00000003411	13.0327	2.10978	0.671389	0.0501911	0.101371
ENSDARG00000090232	64.5275	1.64257	0.49224	0.0501917	0.101375
ENSDARG00000010244	233.499	1.5326	0.453854	0.0501922	0.101378
ENSDARG00000010524	33.7008	-2.50548	0.856857	0.0501934	0.101385
ENSDARG00000026406	18.9077	1.8732	0.577678	0.0501936	0.101385
ENSDARG00000008487	85.8782	-1.15088	0.328932	0.0501936	0.101385
ENSDARG00000027355	40.1553	1.87666	0.57901	0.0501936	0.101385
[truncated: 29,702 more rows]

## Sheet: MTZ_C
gene	baseMean	log2FoldChange	lfcSE	pvalue	padj
ENSDARG00000003599	1239.75	2.45574	0.230891	5.32299e-25	1.82791e-21
ENSDARG00000102317	2507.87	3.19416	0.316547	2.19461e-23	3.76815e-20
ENSDARG00000007320	2393.24	2.97817	0.302243	4.28e-22	4.89918e-19
ENSDARG00000036298	721.772	4.39386	0.461164	6.91944e-22	5.94034e-19
ENSDARG00000030602	3059.29	3.92571	0.433071	9.20914e-20	6.27679e-17
ENSDARG00000041232	2212.54	3.74745	0.412769	1.0967e-19	6.27679e-17
ENSDARG00000036875	3258.37	3.316	0.3674	4.61333e-19	2.26317e-16
ENSDARG00000100392	4198.67	3.51553	0.393919	7.15663e-19	3.07198e-16
ENSDARG00000036044	1767.84	4.3765	0.499932	8.28622e-19	3.16165e-16
ENSDARG00000006691	642.892	3.95326	0.462749	8.97345e-18	3.08148e-15
ENSDARG00000058105	6515.22	3.23038	0.373236	1.56963e-17	4.90009e-15
ENSDARG00000081423	187.139	5.34801	0.650483	1.98223e-17	5.67247e-15
ENSDARG00000041619	578.84	4.52113	0.543839	2.98827e-17	7.89363e-15
ENSDARG00000015128	3026.61	4.67851	0.569451	5.52373e-17	1.35489e-14
ENSDARG00000042566	823.848	3.06206	0.359042	7.39971e-17	1.69404e-14
ENSDARG00000043453	1340.59	3.32639	0.399549	2.07363e-16	4.45052e-14
ENSDARG00000091148	1782.29	4.30412	0.539173	5.67265e-16	1.14588e-13
ENSDARG00000013623	2054.98	3.83986	0.47784	7.45928e-16	1.42306e-13
ENSDARG00000042660	384.177	3.13108	0.38193	1.00018e-15	1.80769e-13
ENSDARG00000051783	1514.3	3.08357	0.376591	1.23521e-15	2.10017e-13
ENSDARG00000023298	3525.3	3.38708	0.418817	1.28432e-15	2.10017e-13
ENSDARG00000057460	4095.04	4.34433	0.553937	1.62476e-15	2.5361e-13
ENSDARG00000029500	1330.74	3.60512	0.45734	4.0432e-15	6.03667e-13
ENSDARG00000032929	1151.91	3.5138	0.444835	4.34716e-15	6.22006e-13
ENSDARG00000063911	842.414	3.2181	0.405799	7.03226e-15	9.65952e-13
ENSDARG00000076693	1666.72	4.62542	0.611974	9.76803e-15	1.29013e-12
ENSDARG00000087164	1371.07	4.44126	0.590669	1.67978e-14	2.13643e-12
ENSDARG00000037870	4728.06	2.89326	0.372236	5.95305e-14	7.30099e-12
ENSDARG00000034897	2208.18	3.51216	0.46626	7.58909e-14	8.98653e-12
ENSDARG00000029533	1666.25	3.1966	0.420018	9.17176e-14	1.04986e-11
ENSDARG00000030408	642.073	3.22238	0.429267	1.89586e-13	2.10012e-11
ENSDARG00000030053	421.665	3.02948	0.400224	1.97711e-13	2.12169e-11
ENSDARG00000068214	640.4	2.87061	0.379273	3.08287e-13	3.20805e-11
ENSDARG00000011405	16330	3.69803	0.507902	3.31675e-13	3.34992e-11
ENSDARG00000076572	1494.16	4.22821	0.602128	8.21353e-13	8.05864e-11
ENSDARG00000038559	726.108	2.53168	0.335417	8.98474e-13	8.57045e-11
ENSDARG00000054818	1123.26	3.16477	0.432745	9.41781e-13	8.74075e-11
ENSDARG00000046157	1573.78	2.90078	0.396072	1.79388e-12	1.6211e-10
ENSDARG00000009447	207.39	4.40436	0.642383	1.93278e-12	1.68045e-10
ENSDARG00000104011	297.463	3.47175	0.488578	1.95742e-12	1.68045e-10
ENSDARG00000053365	2538.82	3.82699	0.551479	2.94626e-12	2.45977e-10
ENSDARG00000094310	686.224	3.76389	0.541218	3.00845e-12	2.45977e-10
ENSDARG00000020504	116.617	3.69011	0.533131	4.41088e-12	3.52255e-10
ENSDARG00000005926	186.312	3.90129	0.569583	4.7631e-12	3.71738e-10
ENSDARG00000039914	271.021	4.10966	0.606836	5.52562e-12	4.21666e-10
ENSDARG00000035860	5524.88	2.7824	0.388971	8.67544e-12	6.4764e-10
ENSDARG00000025566	245.48	2.66363	0.371896	1.12142e-11	8.1935e-10
ENSDARG00000002193	639.206	3.44595	0.503663	1.33785e-11	9.57121e-10
ENSDARG00000067829	483.454	-2.27151	0.312945	1.47575e-11	1.02072e-09
ENSDARG00000053457	1563.47	2.67414	0.37561	1.48619e-11	1.02072e-09
ENSDARG00000062469	1740.74	-2.0268	0.276862	1.5579e-11	1.04898e-09
ENSDARG00000019181	4011.62	2.51383	0.353371	2.35697e-11	1.55651e-09
ENSDARG00000036329	224.446	4.05287	0.617842	2.49655e-11	1.61757e-09
ENSDARG00000103007	578.4	3.29596	0.488371	3.68833e-11	2.34551e-09
ENSDARG00000095273	89.8196	4.6633	0.738327	3.80038e-11	2.37282e-09
ENSDARG00000070083	1250.55	3.26077	0.483189	4.05425e-11	2.48612e-09
ENSDARG00000042993	1619.4	3.41928	0.516741	6.57949e-11	3.96385e-09
ENSDARG00000021811	308.151	2.38214	0.343791	1.21788e-10	7.09351e-09
ENSDARG00000021838	3574.51	3.68786	0.573723	1.21875e-10	7.09351e-09
ENSDARG00000080152	197.882	4.61498	0.75557	1.41195e-10	7.96246e-09
ENSDARG00000014690	806.075	2.90059	0.432352	1.41442e-10	7.96246e-09
ENSDARG00000024548	852.134	3.42686	0.527954	1.48815e-10	8.24241e-09
ENSDARG00000076058	16.1203	-3.9917	0.634523	1.55608e-10	8.48189e-09
ENSDARG00000063908	2968.9	3.33835	0.513182	1.69167e-10	9.07686e-09
ENSDARG00000011841	279.165	4.09556	0.659792	2.13207e-10	1.12639e-08
ENSDARG00000035871	5141.4	3.31841	0.512993	2.26151e-10	1.17667e-08
ENSDARG00000091131	273.102	-1.81327	0.259801	2.71895e-10	1.39356e-08
ENSDARG00000074340	178.237	2.76098	0.414615	2.91158e-10	1.47035e-08
ENSDARG00000039347	1259.04	2.38823	0.351504	3.06345e-10	1.51515e-08
ENSDARG00000076790	1508.8	3.63217	0.576356	3.08855e-10	1.51515e-08
ENSDARG00000092693	1032.28	3.08716	0.474142	3.17299e-10	1.53465e-08
ENSDARG00000069792	871.011	4.39482	0.727778	3.26792e-10	1.55861e-08
ENSDARG00000069801	3060.83	3.48435	0.550839	3.76326e-10	1.75521e-08
ENSDARG00000021864	3881.18	2.31601	0.341156	3.78233e-10	1.75521e-08
ENSDARG00000010516	1437.75	2.3836	0.35312	4.19734e-10	1.92182e-08
ENSDARG00000073750	1677.52	3.37976	0.534917	5.1071e-10	2.3076e-08
ENSDARG00000103919	629.159	3.39701	0.538746	5.3081e-10	2.36728e-08
ENSDARG00000100409	51.1233	4.23792	0.708883	6.31491e-10	2.78018e-08
ENSDARG00000010244	233.499	3.2066	0.505114	6.61817e-10	2.87681e-08
ENSDARG00000044562	281.653	3.31105	0.527517	7.93514e-10	3.40616e-08
ENSDARG00000018637	225.803	2.81248	0.433912	8.22704e-10	3.48786e-08
ENSDARG00000041435	938.865	3.14777	0.497326	8.75193e-10	3.66514e-08
ENSDARG00000090428	648.606	3.46243	0.560862	1.03473e-09	4.28102e-08
ENSDARG00000025581	986.224	2.09698	0.312947	1.11769e-09	4.56923e-08
ENSDARG00000104537	166.678	3.97299	0.665804	1.14916e-09	4.64261e-08
ENSDARG00000093688	35.1708	4.74952	0.84005	1.18813e-09	4.73911e-08
ENSDARG00000099022	3407.82	2.73795	0.42414	1.20065e-09	4.73911e-08
ENSDARG00000087324	377.453	3.85275	0.642609	1.25147e-09	4.88358e-08
ENSDARG00000023290	198.107	2.64825	0.409274	1.38527e-09	5.34496e-08
ENSDARG00000091001	83.908	4.31055	0.744	1.54642e-09	5.90045e-08
ENSDARG00000019230	858.683	3.12795	0.501724	1.68837e-09	6.37129e-08
ENSDARG00000007682	63.943	3.33633	0.547771	2.372e-09	8.85377e-08
ENSDARG00000069113	786.71	-1.70799	0.255469	2.47819e-09	9.15066e-08
ENSDARG00000103433	2490.54	2.1554	0.328499	2.53012e-09	9.24303e-08
ENSDARG00000080337	199218	2.04222	0.310031	2.68785e-09	9.71588e-08
ENSDARG00000056744	288.008	3.72538	0.632372	3.07063e-09	1.09839e-07
ENSDARG00000078942	261.904	-1.6994	0.255584	3.22014e-09	1.14e-07
ENSDARG00000002082	98.6349	3.13825	0.51399	3.66477e-09	1.28417e-07
ENSDARG00000063068	770.375	-1.59157	0.239374	3.76895e-09	1.30733e-07
ENSDARG00000096003	83.5697	3.53725	0.596681	3.83203e-09	1.31592e-07
ENSDARG00000052114	494.145	-1.74376	0.263767	3.88877e-09	1.32218e-07
ENSDARG00000068507	812.036	3.31042	0.550169	3.97831e-09	1.33937e-07
ENSDARG00000098273	267.235	-1.86737	0.284145	4.12071e-09	1.37384e-07
ENSDARG00000008859	1518.52	-1.95438	0.299878	5.07078e-09	1.65844e-07
ENSDARG00000053875	712.025	3.08054	0.506787	5.07095e-09	1.65844e-07
ENSDARG00000104945	302.011	3.5869	0.61254	5.21566e-09	1.68968e-07
ENSDARG00000041925	382.564	3.558	0.60698	5.39655e-09	1.73194e-07
ENSDARG00000063905	2321.99	2.12666	0.330354	6.09365e-09	1.93756e-07
ENSDARG00000006260	284.335	3.65988	0.633918	7.08073e-09	2.21254e-07
ENSDARG00000016793	6569.25	2.93561	0.482185	7.145e-09	2.21254e-07
ENSDARG00000098080	544.061	-1.55742	0.237387	7.15176e-09	2.21254e-07
ENSDARG00000018903	196.954	2.68235	0.432766	7.25929e-09	2.22575e-07
ENSDARG00000068992	1228.38	2.16213	0.33801	7.37701e-09	2.24183e-07
ENSDARG00000099220	62.4381	-2.21729	0.347816	7.52792e-09	2.26762e-07
ENSDARG00000070849	524.344	3.33303	0.567077	8.65697e-09	2.56456e-07
ENSDARG00000006413	1085.04	2.5553	0.410557	8.66305e-09	2.56456e-07
ENSDARG00000021257	299.401	2.68988	0.436458	8.86494e-09	2.6019e-07
ENSDARG00000034753	163.37	3.82606	0.679037	1.05982e-08	3.07254e-07
ENSDARG00000021509	106.064	2.8859	0.477345	1.06474e-08	3.07254e-07
ENSDARG00000071015	341.213	-1.60716	0.248028	1.14392e-08	3.27352e-07
ENSDARG00000025850	545.859	3.0458	0.512125	1.23894e-08	3.51613e-07
ENSDARG00000032868	929.791	-1.45645	0.22485	1.41693e-08	3.9883e-07
ENSDARG00000015978	168.934	2.92726	0.491525	1.64095e-08	4.58133e-07
ENSDARG00000055350	76.3134	-2.01881	0.320037	1.75594e-08	4.86283e-07
ENSDARG00000099833	56.3017	3.57414	0.634288	1.91344e-08	5.2566e-07
ENSDARG00000102353	743.691	-2.144	0.343134	1.99079e-08	5.42568e-07
ENSDARG00000042933	228.659	-1.70629	0.268189	2.13479e-08	5.77233e-07
ENSDARG00000019702	531.486	2.79739	0.469163	2.25813e-08	6.05814e-07
ENSDARG00000043371	88.4767	2.47394	0.405471	2.30028e-08	6.12339e-07
ENSDARG00000034427	31.6947	4.13197	0.773417	2.49505e-08	6.59078e-07
ENSDARG00000095897	56.6251	3.68417	0.665545	2.54713e-08	6.67699e-07
ENSDARG00000017084	59.2131	3.50194	0.624104	2.61443e-08	6.80149e-07
ENSDARG00000052073	131.591	3.02039	0.519238	2.88604e-08	7.45162e-07
ENSDARG00000058734	85.9986	3.00125	0.515279	2.91174e-08	7.46189e-07
ENSDARG00000013430	236.476	2.39855	0.393784	2.96394e-08	7.53938e-07
ENSDARG00000005451	155.384	2.41597	0.39763	3.1167e-08	7.84645e-07
ENSDARG00000053254	2126.85	2.54301	0.422269	3.13035e-08	7.84645e-07
ENSDARG00000070437	893.612	2.45307	0.406177	3.55353e-08	8.84263e-07
ENSDARG00000092807	8841.72	2.90205	0.498273	3.84739e-08	9.50498e-07
ENSDARG00000011648	213.707	2.79221	0.475613	3.96777e-08	9.67378e-07
ENSDARG00000083699	22609.2	-2.04254	0.330927	3.97205e-08	9.67378e-07
ENSDARG00000063899	738.151	2.74435	0.4669	4.34412e-08	1.05054e-06
ENSDARG00000055996	1508.27	2.67247	0.452469	4.45961e-08	1.07093e-06
ENSDARG00000040286	24.4721	3.8989	0.731226	4.54009e-08	1.08269e-06
ENSDARG00000039730	303.541	3.13446	0.551692	4.61986e-08	1.09411e-06
ENSDARG00000074001	315.665	3.27111	0.582631	4.67234e-08	1.09896e-06
ENSDARG00000010113	84.2248	3.33207	0.597759	4.97873e-08	1.16306e-06
ENSDARG00000020893	69.8484	3.15899	0.559633	5.3289e-08	1.23645e-06
ENSDARG00000102128	210.638	-1.67856	0.269637	5.36918e-08	1.23743e-06
ENSDARG00000021124	1713.47	2.037	0.332678	5.46366e-08	1.25081e-06
ENSDARG00000038577	50.7563	4.0082	0.764831	5.57473e-08	1.26779e-06
ENSDARG00000012987	142.484	3.14515	0.558089	5.83176e-08	1.31752e-06
ENSDARG00000099197	467.731	2.94129	0.515462	6.86078e-08	1.53986e-06
ENSDARG00000069600	159.465	2.23396	0.371402	6.99522e-08	1.55984e-06
ENSDARG00000068478	136.095	3.45463	0.633948	7.20968e-08	1.59729e-06
ENSDARG00000037071	214.268	3.82237	0.724717	7.33394e-08	1.61441e-06
ENSDARG00000104069	59.227	2.4345	0.411155	7.63489e-08	1.66995e-06
ENSDARG00000089517	108.643	-2.03041	0.334547	7.7371e-08	1.68159e-06
ENSDARG00000102977	35.4421	-2.90122	0.510705	8.87916e-08	1.91768e-06
ENSDARG00000096849	97.3694	3.92925	0.758506	9.10725e-08	1.95464e-06
ENSDARG00000088383	63.8047	3.77364	0.718276	9.17044e-08	1.95598e-06
ENSDARG00000003311	359.839	-1.76381	0.288983	1.011e-07	2.14306e-06
ENSDARG00000013475	166.332	2.49082	0.428074	1.2171e-07	2.55806e-06
ENSDARG00000014867	1182.39	2.2259	0.375609	1.22167e-07	2.55806e-06
ENSDARG00000088091	164.641	3.30757	0.611798	1.34037e-07	2.78959e-06
ENSDARG00000089665	69.1934	-2.4813	0.427559	1.36492e-07	2.82357e-06
ENSDARG00000017624	810.354	3.09065	0.561185	1.39237e-07	2.8631e-06
ENSDARG00000013333	44.5961	3.97854	0.785546	1.41669e-07	2.89579e-06
ENSDARG00000099663	49.5242	3.7946	0.736311	1.44662e-07	2.93947e-06
ENSDARG00000104042	83.4421	3.63192	0.694529	1.476e-07	2.98152e-06
ENSDARG00000013615	400.248	2.62314	0.458693	1.53894e-07	3.09048e-06
ENSDARG00000063924	1926.22	2.20914	0.375706	1.67369e-07	3.34154e-06
ENSDARG00000021225	442.92	-1.70424	0.282468	1.71582e-07	3.40585e-06
ENSDARG00000009493	205.991	-1.51498	0.249572	1.78882e-07	3.53036e-06
ENSDARG00000077717	3307.89	2.95017	0.533864	1.85816e-07	3.61679e-06
ENSDARG00000059360	95.4575	3.15913	0.582911	1.86714e-07	3.61679e-06
ENSDARG00000035715	865.162	1.94631	0.327076	1.88136e-07	3.61679e-06
ENSDARG00000063912	4471.06	2.89386	0.521223	1.88199e-07	3.61679e-06
ENSDARG00000016788	367.107	-1.67648	0.278294	1.89541e-07	3.61679e-06
ENSDARG00000036500	24.5444	3.55854	0.682145	1.89737e-07	3.61679e-06
ENSDARG00000099104	2720.27	1.77578	0.296077	1.90635e-07	3.61679e-06
ENSDARG00000007461	75.6485	-2.0655	0.349629	1.92983e-07	3.64123e-06
ENSDARG00000077776	66.2514	2.97257	0.539936	1.95756e-07	3.67337e-06
ENSDARG00000035557	100.081	3.11014	0.57234	1.97529e-07	3.6865e-06
ENSDARG00000036834	271.625	3.4118	0.646532	2.02689e-07	3.76234e-06
ENSDARG00000020228	370.364	-1.91077	0.321538	2.11014e-07	3.89581e-06
ENSDARG00000102643	83.4998	2.66583	0.472683	2.15826e-07	3.96334e-06
ENSDARG00000103566	252.618	2.85333	0.515802	2.36106e-07	4.3127e-06
ENSDARG00000101507	172.624	-2.03214	0.345502	2.41374e-07	4.38561e-06
ENSDARG00000004539	427.266	-1.95913	0.332181	2.52759e-07	4.54634e-06
ENSDARG00000003403	191.654	-1.73548	0.291083	2.52869e-07	4.54634e-06
ENSDARG00000099664	67.9931	3.63577	0.712236	2.75082e-07	4.91995e-06
ENSDARG00000007824	1212.2	-1.53304	0.255747	2.79103e-07	4.96602e-06
ENSDARG00000014717	335.757	-1.76649	0.297729	2.86759e-07	5.07592e-06
ENSDARG00000058522	233.264	-1.71911	0.289249	2.90902e-07	5.12286e-06
ENSDARG00000039268	51.3661	3.15104	0.590494	2.99504e-07	5.24744e-06
ENSDARG00000056258	336.959	-1.63543	0.274648	3.08371e-07	5.37536e-06
ENSDARG00000091408	165.776	-1.72912	0.291616	3.11611e-07	5.40441e-06
ENSDARG00000095556	95.1013	3.39048	0.651548	3.14499e-07	5.42709e-06
ENSDARG00000075936	90.9875	-2.11156	0.36359	3.1875e-07	5.47293e-06
ENSDARG00000034291	1659.61	2.48603	0.439854	3.25034e-07	5.55308e-06
ENSDARG00000011125	61.4246	3.19477	0.60392	3.39696e-07	5.77483e-06
ENSDARG00000013979	58.8497	3.30539	0.63264	3.54175e-07	5.99132e-06
ENSDARG00000044422	123.634	-1.93883	0.331623	3.57097e-07	6.01114e-06
ENSDARG00000102142	755.752	-1.86265	0.317496	3.63558e-07	6.09004e-06
ENSDARG00000018146	45.2541	3.84502	0.781156	3.89805e-07	6.49802e-06
ENSDARG00000025397	43.834	3.50847	0.690973	4.38077e-07	7.26742e-06
ENSDARG00000056141	52.4197	3.50914	0.691659	4.46292e-07	7.35138e-06
ENSDARG00000036282	24.7955	3.90814	0.804702	4.47419e-07	7.35138e-06
ENSDARG00000039346	46.1269	3.52955	0.697377	4.49899e-07	7.35692e-06
ENSDARG00000036613	180.996	-2.37362	0.420617	4.54223e-07	7.39243e-06
ENSDARG00000076542	206.091	-1.80423	0.308682	4.58113e-07	7.42057e-06
ENSDARG00000001817	50.7222	-1.839	0.315408	4.70291e-07	7.58206e-06
ENSDARG00000016676	598.706	1.85275	0.318505	4.97614e-07	7.96591e-06
ENSDARG00000060115	81.5904	-2.19013	0.384104	4.98739e-07	7.96591e-06
ENSDARG00000104517	66.8669	3.61696	0.726234	5.32727e-07	8.46937e-06
ENSDARG00000102051	318.063	3.00155	0.568327	6.09711e-07	9.64861e-06
ENSDARG00000003054	163.075	-2.25451	0.400564	6.58174e-07	1.03442e-05
ENSDARG00000011171	210.795	-1.94004	0.33785	6.59689e-07	1.03442e-05
ENSDARG00000059600	105.652	-1.77643	0.307011	6.80483e-07	1.06217e-05
ENSDARG00000061862	782.576	-1.79284	0.310311	6.96864e-07	1.08282e-05
ENSDARG00000045402	71.2222	3.53871	0.713001	7.11671e-07	1.10085e-05
ENSDARG00000102121	22.3867	3.81749	0.794492	7.18455e-07	1.10636e-05
ENSDARG00000103651	335.029	-2.13859	0.378054	7.25047e-07	1.11152e-05
ENSDARG00000092170	227.643	2.85219	0.535592	7.34616e-07	1.12119e-05
ENSDARG00000043865	20.1932	3.88736	0.818672	7.67218e-07	1.16576e-05
ENSDARG00000063711	195.817	-1.73047	0.300034	8.18591e-07	1.23834e-05
ENSDARG00000103791	594.54	1.92178	0.337048	8.64967e-07	1.30276e-05
ENSDARG00000053487	86.0574	-1.79719	0.313364	8.87871e-07	1.33142e-05
ENSDARG00000100222	490.859	-1.67738	0.290975	9.0454e-07	1.35052e-05
ENSDARG00000027249	860.229	2.35563	0.426111	9.11557e-07	1.3551e-05
ENSDARG00000078947	79.6647	-1.71154	0.297521	9.20908e-07	1.3631e-05
ENSDARG00000007172	612.507	-1.48906	0.256595	9.38402e-07	1.38304e-05
ENSDARG00000044093	1055.88	1.88391	0.33101	9.8505e-07	1.44482e-05
ENSDARG00000069826	494.043	3.76054	0.788744	9.89178e-07	1.44482e-05
ENSDARG00000031776	623.463	2.49544	0.457949	9.92947e-07	1.44482e-05
ENSDARG00000030349	391.535	2.88185	0.548788	1.00253e-06	1.45261e-05
ENSDARG00000041887	190.753	-1.53296	0.26571	1.08268e-06	1.56215e-05
ENSDARG00000038870	1164.74	-1.68889	0.2948	1.09674e-06	1.57582e-05
ENSDARG00000078348	626.871	-1.5445	0.268032	1.11066e-06	1.58917e-05
ENSDARG00000039887	180.304	2.55529	0.473366	1.12255e-06	1.59952e-05
ENSDARG00000054890	72.866	2.56904	0.476633	1.13121e-06	1.6052e-05
ENSDARG00000055429	433.789	-1.62315	0.282947	1.15732e-06	1.63549e-05
ENSDARG00000078785	132.356	3.38568	0.68647	1.24839e-06	1.75695e-05
ENSDARG00000053129	35.107	3.76781	0.799947	1.25521e-06	1.75934e-05
ENSDARG00000075747	192.942	-1.65986	0.290839	1.3022e-06	1.81778e-05
ENSDARG00000005772	615.953	-1.58378	0.276626	1.30788e-06	1.81832e-05
ENSDARG00000020759	279.134	-2.03196	0.363357	1.31361e-06	1.81892e-05
ENSDARG00000104839	77.836	2.82522	0.541186	1.38429e-06	1.9091e-05
ENSDARG00000099499	103.362	2.8505	0.547632	1.39693e-06	1.91882e-05
ENSDARG00000016443	4169.62	-1.3554	0.235316	1.42624e-06	1.94806e-05
ENSDARG00000036438	30.1847	3.34595	0.679176	1.42956e-06	1.94806e-05
ENSDARG00000090930	565.551	-1.76276	0.311937	1.5348e-06	2.0832e-05
ENSDARG00000086658	528.998	3.65649	0.773494	1.57141e-06	2.11168e-05
ENSDARG00000007385	229.565	2.2402	0.408807	1.57415e-06	2.11168e-05
ENSDARG00000036456	419.916	-1.96672	0.352264	1.57423e-06	2.11168e-05
ENSDARG00000081270	4766.73	-1.76782	0.313335	1.60411e-06	2.14339e-05
ENSDARG00000087456	140.265	3.37866	0.691915	1.61291e-06	2.1468e-05
ENSDARG00000060948	120.232	2.87129	0.556169	1.64464e-06	2.18057e-05
ENSDARG00000067832	180.234	-2.05412	0.371178	1.74614e-06	2.29752e-05
ENSDARG00000060489	55.3214	2.6847	0.511295	1.74622e-06	2.29752e-05
ENSDARG00000021984	59.2274	3.88728	0.85401	1.77024e-06	2.32023e-05
ENSDARG00000036428	25.3407	3.27977	0.668439	1.89005e-06	2.46785e-05
ENSDARG00000076526	730.065	-1.47547	0.259918	2.01065e-06	2.61536e-05
ENSDARG00000010553	94.1015	2.88345	0.564022	2.06113e-06	2.67092e-05
ENSDARG00000098654	205.153	-1.53314	0.271435	2.19797e-06	2.83754e-05
ENSDARG00000014569	123.559	2.31294	0.429414	2.22213e-06	2.85797e-05
ENSDARG00000043323	198.335	2.42414	0.454516	2.2471e-06	2.8793e-05
ENSDARG00000019008	110.085	2.80534	0.546198	2.27329e-06	2.90203e-05
ENSDARG00000017235	684.842	2.48396	0.46889	2.33686e-06	2.97214e-05
ENSDARG00000032102	43.4847	3.03838	0.607697	2.35012e-06	2.97797e-05
ENSDARG00000100630	77.1781	3.47936	0.7347	2.44922e-06	3.09214e-05
ENSDARG00000098816	59.4159	-2.39395	0.449839	2.58329e-06	3.24945e-05
ENSDARG00000003421	174.972	-1.78793	0.322511	2.72072e-06	3.40983e-05
ENSDARG00000075567	69.1922	-2.23557	0.415533	2.76242e-06	3.4495e-05
ENSDARG00000068562	374.055	-1.41527	0.25161	2.92628e-06	3.64089e-05
ENSDARG00000003631	371.74	-1.73754	0.31338	2.94421e-06	3.64298e-05
ENSDARG00000002217	58.6885	2.79004	0.547746	2.95365e-06	3.64298e-05
ENSDARG00000071060	85.6445	2.53088	0.483915	2.95979e-06	3.64298e-05
ENSDARG00000094460	226.284	-1.70562	0.30722	2.97327e-06	3.6465e-05
ENSDARG00000103288	48.0204	3.4116	0.720823	2.99133e-06	3.6556e-05
ENSDARG00000003251	38.8563	-2.63281	0.509685	3.15369e-06	3.84034e-05
ENSDARG00000005191	283.554	2.84623	0.564043	3.21179e-06	3.89727e-05
ENSDARG00000007697	2790.27	3.17814	0.655447	3.32287e-06	4.01787e-05
ENSDARG00000075034	59.2648	3.4746	0.743907	3.33815e-06	4.02218e-05
ENSDARG00000019404	55.8462	3.97694	0.922193	3.40025e-06	4.08268e-05
ENSDARG00000006019	104.969	3.01872	0.613017	3.6148e-06	4.32516e-05
ENSDARG00000037350	668.293	1.69318	0.306744	3.63376e-06	4.33276e-05
ENSDARG00000045248	1851.91	2.43541	0.465265	3.71107e-06	4.40962e-05
ENSDARG00000012914	527.605	-1.31001	0.23379	3.73959e-06	4.42818e-05
ENSDARG00000041314	58.0625	3.31132	0.699127	3.89261e-06	4.59355e-05
ENSDARG00000086842	79.9741	2.98391	0.606527	4.08507e-06	4.80415e-05
ENSDARG00000058369	139.886	-1.83254	0.336115	4.21997e-06	4.94587e-05
ENSDARG00000027200	19.679	3.2864	0.694381	4.24353e-06	4.95655e-05
ENSDARG00000092488	369.441	-1.79598	0.328847	4.26735e-06	4.96748e-05
ENSDARG00000041623	756.604	2.63254	0.51553	4.28849e-06	4.97523e-05
ENSDARG00000029114	229.829	-1.50754	0.272392	4.37075e-06	5.05359e-05
ENSDARG00000069175	78.6977	2.27614	0.431444	4.42103e-06	5.09457e-05
ENSDARG00000061017	53.6074	-2.32814	0.443594	4.51089e-06	5.18073e-05
ENSDARG00000097055	42.5235	2.31169	0.440559	4.72572e-06	5.39611e-05
ENSDARG00000086917	1108.54	3.29569	0.70064	4.72985e-06	5.39611e-05
ENSDARG00000074777	404.382	-1.49196	0.270406	4.91135e-06	5.58462e-05
ENSDARG00000035692	1382.76	1.66581	0.304406	4.95364e-06	5.61412e-05
ENSDARG00000017314	513.95	2.8116	0.56495	5.02667e-06	5.67815e-05
ENSDARG00000020258	50.6562	2.38146	0.458384	5.23488e-06	5.87098e-05
ENSDARG00000036844	101.127	-1.96755	0.366553	5.24285e-06	5.87098e-05
ENSDARG00000051879	69.2359	-2.42317	0.468274	5.24867e-06	5.87098e-05
ENSDARG00000030265	58.2281	3.05223	0.636261	6.08987e-06	6.77591e-05
ENSDARG00000076001	159.922	-1.9441	0.363491	6.09714e-06	6.77591e-05
ENSDARG00000004261	86.1459	2.85609	0.581714	6.17601e-06	6.84142e-05
ENSDARG00000062463	27.4348	3.35798	0.730139	6.38744e-06	7.05289e-05
ENSDARG00000103929	68.7271	2.48368	0.486567	6.4658e-06	7.11653e-05
ENSDARG00000101465	18.3289	3.80055	0.887659	6.59366e-06	7.23407e-05
ENSDARG00000093844	48.2058	3.81905	0.898415	6.97412e-06	7.62711e-05
ENSDARG00000003035	465.256	-1.75891	0.326791	7.0463e-06	7.68159e-05
ENSDARG00000069827	1033.02	3.17345	0.676776	7.16231e-06	7.78334e-05
ENSDARG00000102558	95.4495	3.00839	0.628424	7.24062e-06	7.84362e-05
ENSDARG00000058044	296.947	-1.63314	0.301936	7.41538e-06	8.00767e-05
ENSDARG00000010519	428.413	-1.42302	0.260808	7.57104e-06	8.15015e-05
ENSDARG00000033140	379.79	-1.70126	0.316241	7.85298e-06	8.42723e-05
ENSDARG00000100084	27.5336	-2.25839	0.436561	7.9486e-06	8.50327e-05
ENSDARG00000105215	56.5552	-1.84657	0.346623	8.19673e-06	8.74148e-05
ENSDARG00000073874	114.067	3.88513	0.938329	8.31379e-06	8.83887e-05
ENSDARG00000020982	136.038	-1.71046	0.318957	8.4976e-06	9.00641e-05
ENSDARG00000074552	119.027	3.00438	0.632823	8.84073e-06	9.34126e-05
ENSDARG00000070985	31.4222	3.42306	0.76382	8.88856e-06	9.36298e-05
ENSDARG00000088823	1504.62	3.16902	0.682734	9.02214e-06	9.47462e-05
ENSDARG00000003705	150.96	2.23951	0.434814	9.35892e-06	9.79833e-05
ENSDARG00000059304	52.758	3.09604	0.662379	9.58032e-06	9.99068e-05
ENSDARG00000013207	377.238	-1.57421	0.29273	9.60083e-06	9.99068e-05
ENSDARG00000051886	691.295	1.49551	0.277142	9.64995e-06	0.000100115
ENSDARG00000045976	113.745	-2.05173	0.393041	9.82389e-06	0.000101612
ENSDARG00000004581	253.307	-2.18471	0.423739	1.03319e-05	0.00010629
ENSDARG00000100664	176.775	-1.8634	0.352984	1.0338e-05	0.00010629
ENSDARG00000031100	574.287	-1.9756	0.377327	1.05484e-05	0.000108129
ENSDARG00000045145	70.917	-2.12571	0.410904	1.07529e-05	0.000109897
ENSDARG00000062765	783.745	-1.25847	0.232038	1.09534e-05	0.000111614
ENSDARG00000040778	13.6912	3.46754	0.789352	1.13686e-05	0.000115503
ENSDARG00000044902	707.58	1.73109	0.326595	1.15539e-05	0.000117038
ENSDARG00000100151	65.4952	-2.32551	0.459164	1.18812e-05	0.00012
ENSDARG00000034777	40.7575	3.28128	0.729839	1.25461e-05	0.000126344
ENSDARG00000041926	257.382	-1.60142	0.301078	1.27509e-05	0.000128031
ENSDARG00000087937	66.85	2.74398	0.568608	1.28018e-05	0.000128168
ENSDARG00000078981	32.252	-2.49967	0.504329	1.31703e-05	0.000131473
ENSDARG00000030411	1842.4	2.42017	0.484336	1.32258e-05	0.000131645
ENSDARG00000001754	377.28	-1.37939	0.257318	1.35777e-05	0.000134756
ENSDARG00000011170	164.2	1.77816	0.338455	1.37555e-05	0.000136128
ENSDARG00000006370	81.7606	2.70908	0.561272	1.40637e-05	0.000138778
ENSDARG00000074149	262.281	-1.59093	0.299993	1.41043e-05	0.00013878
ENSDARG00000010965	98.7215	2.12246	0.414742	1.45073e-05	0.000142337
ENSDARG00000022213	15.409	3.61709	0.858237	1.48319e-05	0.000145108
ENSDARG00000098852	15.1089	3.50044	0.814646	1.52661e-05	0.000148931
ENSDARG00000055589	46.9675	2.8844	0.613735	1.56404e-05	0.000152151
ENSDARG00000035136	238.239	2.32883	0.465367	1.60458e-05	0.000155653
ENSDARG00000042221	87.9469	-2.04885	0.399697	1.62484e-05	0.000157015
ENSDARG00000002601	61.0779	-2.28647	0.455307	1.62776e-05	0.000157015
ENSDARG00000030537	138.988	2.28996	0.456283	1.63975e-05	0.000157729
ENSDARG00000054355	107.54	3.32025	0.753746	1.65695e-05	0.000158938
ENSDARG00000092873	112.251	3.14403	0.695657	1.68125e-05	0.000160819
ENSDARG00000043457	566.587	2.40749	0.485886	1.68892e-05	0.000161104
ENSDARG00000098674	146.874	-1.85072	0.356757	1.72631e-05	0.000164215
ENSDARG00000061397	404.94	-1.41095	0.265782	1.73918e-05	0.000164982
ENSDARG00000021195	135.421	-1.52807	0.289542	1.77132e-05	0.000167483
ENSDARG00000079455	47.903	2.93413	0.63212	1.7753e-05	0.000167483
ENSDARG00000104934	47.3499	-2.23399	0.444514	1.80899e-05	0.000170103
ENSDARG00000016903	41.3108	2.90371	0.623626	1.81298e-05	0.000170103
ENSDARG00000013863	294.393	2.18991	0.434124	1.82058e-05	0.000170351
ENSDARG00000099424	283.355	-1.26545	0.237629	1.87287e-05	0.000174767
ENSDARG00000020133	66.2595	-1.88646	0.36576	1.89542e-05	0.00017604
ENSDARG00000062326	182.527	2.43118	0.494202	1.89676e-05	0.00017604
ENSDARG00000097635	299.126	1.90037	0.368938	1.91361e-05	0.000177125
ENSDARG00000083179	72.3474	3.42406	0.797066	1.9209e-05	0.000177322
ENSDARG00000104082	172.103	-1.85812	0.359884	1.9396e-05	0.000178568
ENSDARG00000037746	833.136	2.32336	0.467825	1.97074e-05	0.00018095
ENSDARG00000086912	930.276	3.59994	0.868729	2.03416e-05	0.000186275
ENSDARG00000079731	126.315	-1.49101	0.283459	2.0464e-05	0.000186897
ENSDARG00000027187	162.904	-1.60008	0.305896	2.06012e-05	0.000187651
ENSDARG00000017445	257.722	1.95435	0.381966	2.06705e-05	0.000187784
ENSDARG00000035400	705.83	2.08909	0.41268	2.07826e-05	0.000188304
ENSDARG00000093382	37.2785	2.72373	0.575207	2.09349e-05	0.000188826
ENSDARG00000098250	86.2752	3.18014	0.715379	2.09501e-05	0.000188826
ENSDARG00000008748	84.687	2.58578	0.537692	2.1582e-05	0.000194012
ENSDARG00000017803	75.9876	2.26389	0.455172	2.19444e-05	0.000196754
ENSDARG00000045618	287.788	2.51415	0.519504	2.25972e-05	0.000202081
ENSDARG00000099312	76.6567	2.11638	0.420469	2.27239e-05	0.000202686
ENSDARG00000063718	174.8	-1.79873	0.34928	2.31186e-05	0.000205672
ENSDARG00000100703	22.5063	3.49748	0.834353	2.32314e-05	0.000206141
ENSDARG00000055054	59.1498	-1.85268	0.361488	2.39284e-05	0.000211779
ENSDARG00000062338	292.469	-1.4055	0.267701	2.40456e-05	0.000212268
ENSDARG00000055154	198.146	-1.69476	0.327954	2.49898e-05	0.000220038
ENSDARG00000101584	19.5678	2.98927	0.660637	2.57429e-05	0.00022609
ENSDARG00000052856	610.695	-1.376	0.26241	2.58131e-05	0.000226128
ENSDARG00000034146	19.605	3.51553	0.847602	2.60065e-05	0.000227242
ENSDARG00000094673	271.426	2.20474	0.444145	2.64999e-05	0.000230966
ENSDARG00000029230	45.6667	3.43521	0.817208	2.6782e-05	0.000232834
ENSDARG00000076974	25.7126	-2.17327	0.437145	2.743e-05	0.000237866
ENSDARG00000104353	169.237	1.87869	0.369151	2.75352e-05	0.000238127
ENSDARG00000088817	90.733	-1.79889	0.351612	2.75988e-05	0.000238127
ENSDARG00000002600	60.9812	-1.56369	0.301577	2.77313e-05	0.00023867
ENSDARG00000013522	216.275	-1.73999	0.339077	2.81167e-05	0.000241382
ENSDARG00000061735	600.09	-1.49953	0.288609	2.86101e-05	0.000245005
ENSDARG00000094695	16.492	3.15229	0.718699	2.9325e-05	0.000250503
ENSDARG00000089917	69.4283	-1.98346	0.394301	3.05209e-05	0.000260072
ENSDARG00000043493	314.36	-1.33131	0.255195	3.14183e-05	0.000267055
ENSDARG00000058451	1796.61	1.50318	0.290489	3.18573e-05	0.000270119
ENSDARG00000096322	353.086	-2.26574	0.463047	3.27223e-05	0.000276325
ENSDARG00000032565	109.926	-1.78818	0.351529	3.2768e-05	0.000276325
ENSDARG00000102645	316.89	-2.11544	0.426382	3.28687e-05	0.000276325
ENSDARG00000074645	118.856	-1.80438	0.355156	3.29276e-05	0.000276325
ENSDARG00000060994	191.465	-1.62625	0.316689	3.29916e-05	0.000276325
ENSDARG00000094191	23.9744	3.33837	0.791273	3.36961e-05	0.000281539
ENSDARG00000079854	534.327	-1.504	0.291477	3.44165e-05	0.00028686
ENSDARG00000014053	126.402	1.52051	0.295418	3.60461e-05	0.000299715
ENSDARG00000074229	411.404	-1.23237	0.23682	3.74873e-05	0.000310946
ENSDARG00000059455	100.167	-1.77538	0.350556	3.76342e-05	0.000311412
ENSDARG00000017843	107.805	2.49599	0.526397	3.80773e-05	0.000314321
ENSDARG00000025797	85.2419	-1.64769	0.323026	3.82716e-05	0.000315167
ENSDARG00000098361	63.3693	2.65817	0.572297	3.85436e-05	0.000316071
ENSDARG00000014577	27.2877	2.55496	0.542975	3.85655e-05	0.000316071
ENSDARG00000004451	54.9211	-1.96661	0.394287	3.92585e-05	0.000320985
ENSDARG00000104809	61.8144	-2.37479	0.49472	3.94056e-05	0.000321422
ENSDARG00000076532	646.852	2.25627	0.466226	4.36549e-05	0.000355239
ENSDARG00000061048	137.666	2.05069	0.415849	4.39844e-05	0.000357074
ENSDARG00000009637	142.623	2.91828	0.655933	4.43185e-05	0.000358766
ENSDARG00000054272	2576.52	-1.07954	0.207635	4.44017e-05	0.000358766
ENSDARG00000062630	78.1816	-1.97244	0.397706	4.47931e-05	0.000361079
ENSDARG00000012113	19.7697	3.64906	0.945343	4.53213e-05	0.000364481
ENSDARG00000070867	58.1542	3.2235	0.762387	4.57755e-05	0.000367273
ENSDARG00000074378	195.764	-1.85684	0.371625	4.62725e-05	0.000370395
ENSDARG00000044565	89.3058	2.34921	0.491997	4.75672e-05	0.000379323
ENSDARG00000036995	33.1476	3.33613	0.807412	4.76744e-05	0.000379323
ENSDARG00000087377	44.096	-2.40671	0.507353	4.77191e-05	0.000379323
ENSDARG00000055475	529.672	1.75006	0.348327	4.83996e-05	0.000383844
ENSDARG00000055759	140.75	-1.99013	0.403223	4.88094e-05	0.000386201
ENSDARG00000037783	444.13	2.42227	0.512544	4.98754e-05	0.000393729
ENSDARG00000062116	37.6398	2.81622	0.627507	5.01934e-05	0.000395331
ENSDARG00000088117	39.8752	-2.18438	0.451096	5.0965e-05	0.000400489
ENSDARG00000082907	24.802	3.72295	1.00022	5.14738e-05	0.000403564
ENSDARG00000019444	36.9492	2.86314	0.643307	5.16807e-05	0.000404263
ENSDARG00000086735	902.082	-1.39086	0.272198	5.18367e-05	0.000404409
ENSDARG00000055540	233.811	-1.57352	0.310762	5.19349e-05	0.000404409
ENSDARG00000012682	63.7585	2.28356	0.476863	5.2355e-05	0.000405936
ENSDARG00000101859	381.047	-1.63561	0.324254	5.23674e-05	0.000405936
ENSDARG00000005162	158.729	2.37687	0.501541	5.2662e-05	0.0004073
ENSDARG00000088293	145.741	-1.69095	0.336751	5.40849e-05	0.000417365
ENSDARG00000042539	186.565	2.07249	0.424687	5.42803e-05	0.000417934
ENSDARG00000035187	71.0733	-1.79213	0.359407	5.47124e-05	0.000420319
ENSDARG00000100805	38.556	-2.35454	0.496665	5.53265e-05	0.000424087
ENSDARG00000056085	23.49	3.43445	0.856677	5.55634e-05	0.000424955
ENSDARG00000043484	157.996	2.01218	0.410714	5.6005e-05	0.00042738
ENSDARG00000030441	25.8565	2.91916	0.665483	5.80581e-05	0.00044188
ENSDARG00000033175	36.5286	3.18357	0.758297	5.81624e-05	0.00044188
ENSDARG00000042467	159.683	-1.57038	0.31185	6.02697e-05	0.000456879
ENSDARG00000041974	26.8094	3.25714	0.789009	6.14597e-05	0.000464013
ENSDARG00000061746	226.52	-1.85108	0.374496	6.1481e-05	0.000464013
ENSDARG00000070607	24.1752	3.13526	0.743413	6.2235e-05	0.000468673
ENSDARG00000023160	19.8726	3.14032	0.746283	6.36872e-05	0.00047856
ENSDARG00000006408	584.865	-1.51965	0.301737	6.44726e-05	0.000483404
ENSDARG00000032865	1167.51	-1.53224	0.304542	6.50456e-05	0.000486637
ENSDARG00000082131	17.4978	3.5671	0.930775	6.5292e-05	0.000487419
ENSDARG00000005456	103.559	-1.8927	0.385177	6.58939e-05	0.00048987
ENSDARG00000063895	644.365	2.14984	0.447311	6.59056e-05	0.00048987
ENSDARG00000086425	158.885	-1.6349	0.327237	6.72322e-05	0.000498651
ENSDARG00000078694	155.76	-1.80142	0.364613	6.79528e-05	0.000502909
ENSDARG00000104181	58.6649	3.11084	0.739823	7.04349e-05	0.000519263
ENSDARG00000060835	102.408	-1.50134	0.298838	7.0485e-05	0.000519263
ENSDARG00000044526	80.8592	-1.55501	0.310427	7.06161e-05	0.000519263
ENSDARG00000105747	12.8678	3.36529	0.841674	7.17168e-05	0.00052623
ENSDARG00000052905	54.8409	3.11962	0.744086	7.20954e-05	0.00052788
ENSDARG00000059035	313.714	-1.52077	0.303316	7.23439e-05	0.000528423
ENSDARG00000057322	87.7916	2.84588	0.649029	7.24774e-05	0.000528423
ENSDARG00000069765	229.348	-1.39613	0.276882	7.33022e-05	0.000533305
ENSDARG00000075805	39.7439	-2.47371	0.536094	7.36955e-05	0.000534301
ENSDARG00000061352	103.544	-1.62242	0.325675	7.37504e-05	0.000534301
ENSDARG00000039185	162.683	3.41875	0.868817	7.58072e-05	0.000548046
ENSDARG00000026829	45.4869	2.68405	0.599191	7.62049e-05	0.00054916
ENSDARG00000060303	187.194	-1.70604	0.344685	7.62811e-05	0.00054916
ENSDARG00000105018	31.0648	3.03184	0.714671	7.65323e-05	0.000549816
ENSDARG00000002235	425.167	-1.87113	0.382603	7.71319e-05	0.000552967
ENSDARG00000079276	77.9911	2.7647	0.625538	7.87971e-05	0.000562416
ENSDARG00000101180	180.525	2.51445	0.549494	7.88665e-05	0.000562416
ENSDARG00000026024	64.9367	-2.05821	0.427856	7.89414e-05	0.000562416
ENSDARG00000017775	126.475	3.12745	0.75165	7.99765e-05	0.000568612
ENSDARG00000044153	59.9454	2.20452	0.465373	8.12245e-05	0.000575472
ENSDARG00000063299	352.968	1.27544	0.252609	8.12767e-05	0.000575472
ENSDARG00000014420	1375.12	2.46764	0.536978	8.17661e-05	0.000577747
ENSDARG00000076752	47.8084	-2.34915	0.504661	8.43472e-05	0.00059476
ENSDARG00000023852	77.4035	2.76774	0.628861	8.47095e-05	0.000596091
ENSDARG00000055514	88.1294	3.67167	1.02265	8.66511e-05	0.000608507
ENSDARG00000059363	61.6611	-2.10612	0.441728	8.75922e-05	0.00061386
ENSDARG00000038075	177.858	2.16666	0.457271	8.82125e-05	0.000616948
ENSDARG00000053217	25.2023	3.23863	0.800245	8.86713e-05	0.000618562
ENSDARG00000027423	97.6348	-2.01414	0.419136	8.88035e-05	0.000618562
ENSDARG00000079610	516.805	-1.29052	0.256715	8.96494e-05	0.00062319
ENSDARG00000088030	1846.98	1.99826	0.416216	9.3789e-05	0.00065065
ENSDARG00000098666	137.34	-1.64163	0.333225	9.49403e-05	0.000657308
ENSDARG00000101635	45.237	-2.42909	0.529992	9.581e-05	0.000661521
ENSDARG00000103802	119.505	-1.35619	0.271259	9.59341e-05	0.000661521
ENSDARG00000027159	63.5468	-2.05406	0.43045	9.62029e-05	0.000661784
ENSDARG00000013966	23.1875	2.92353	0.685585	9.63577e-05	0.000661784
ENSDARG00000089877	215.087	2.69362	0.609894	9.80246e-05	0.000671889
ENSDARG00000095421	412.17	-1.27543	0.254597	9.97601e-05	0.000682423
ENSDARG00000077536	499.701	-1.26015	0.251516	0.000101094	0.000690174
ENSDARG00000077361	749.664	-1.08508	0.215226	0.000101784	0.000693507
ENSDARG00000098240	312.722	-1.73556	0.355579	0.000102793	0.000698996
ENSDARG00000096264	16.0271	-2.83757	0.659422	0.000105429	0.000715497
ENSDARG00000012387	106.535	2.44304	0.536736	0.000106808	0.000723433
ENSDARG00000007960	391.386	-1.23767	0.247384	0.000107434	0.000725428
ENSDARG00000005085	80.7246	2.40834	0.526979	0.000107526	0.000725428
ENSDARG00000054930	299.89	-1.85615	0.384474	0.000108435	0.000730129
ENSDARG00000099269	51.8253	3.29694	0.837615	0.000111094	0.000746567
ENSDARG00000009978	72.4028	3.31741	0.84736	0.000112194	0.00075249
ENSDARG00000056903	12.4128	3.28177	0.832034	0.00011317	0.000757555
ENSDARG00000100826	481.485	-1.41688	0.286127	0.000113908	0.000761009
ENSDARG00000062134	27.8564	-1.86269	0.386969	0.000114943	0.000766438
ENSDARG00000103953	317.493	-1.49113	0.302449	0.000115621	0.00076946
ENSDARG00000035914	28.2825	2.68537	0.612869	0.000116943	0.000776535
ENSDARG00000039400	80.6825	-1.59671	0.325992	0.000117328	0.000776535
ENSDARG00000022684	249.918	3.27443	0.830955	0.000117362	0.000776535
ENSDARG00000022456	228.489	2.5719	0.577621	0.000117792	0.000777877
ENSDARG00000103144	167.669	-1.88719	0.393859	0.000122341	0.000806367
ENSDARG00000038030	31.777	3.00544	0.725705	0.000124712	0.000820423
ENSDARG00000036855	37.0814	2.39661	0.527757	0.00012666	0.000831646
ENSDARG00000094217	34.0202	3.08575	0.757447	0.000127641	0.000836488
ENSDARG00000023220	110.89	2.80627	0.656046	0.000128756	0.000842187
ENSDARG00000033789	144.297	2.5998	0.588955	0.000129159	0.000843217
ENSDARG00000091348	254.289	2.07311	0.440966	0.000129906	0.000846486
ENSDARG00000036994	35.3528	-1.84344	0.384531	0.000131127	0.000852821
ENSDARG00000037203	39.0302	2.60071	0.590462	0.000134463	0.000872666
ENSDARG00000075823	299.898	-1.76158	0.365636	0.000134735	0.000872666
ENSDARG00000101831	179.645	-1.77797	0.369499	0.00013494	0.000872666
ENSDARG00000005026	136.657	-1.78427	0.371096	0.000135958	0.000877288
ENSDARG00000063917	791.197	2.17191	0.467641	0.00013641	0.000877288
ENSDARG00000102963	81.4402	-1.72167	0.356537	0.000136422	0.000877288
ENSDARG00000053047	873.28	1.88598	0.395463	0.000136918	0.000878832
ENSDARG00000044246	82.8767	-2.12291	0.455051	0.000138225	0.000885566
ENSDARG00000100742	162.403	2.03498	0.432649	0.000139469	0.000891873
ENSDARG00000104658	83.6027	-1.9823	0.419476	0.000139872	0.000892787
ENSDARG00000077850	83.4094	2.29762	0.502503	0.000141187	0.000899511
ENSDARG00000035993	49.9991	2.84988	0.674636	0.000141485	0.00089974
ENSDARG00000002167	67.9715	-2.04359	0.435314	0.000142999	0.000907689
ENSDARG00000095908	149.916	2.50266	0.562356	0.000143957	0.000912082
ENSDARG00000037790	69.5873	2.64221	0.606077	0.000145604	0.000920821
ENSDARG00000062154	134.998	-1.57395	0.323987	0.000148275	0.000935983
ENSDARG00000035054	79.2529	2.26692	0.495451	0.000150135	0.000945988
ENSDARG00000008434	93.9027	-1.43522	0.293502	0.0001525	0.000959131
ENSDARG00000073784	76.8193	-1.77155	0.370099	0.000154466	0.00096972
ENSDARG00000098859	123.72	-1.77683	0.371523	0.000156205	0.000978848
ENSDARG00000020101	79.7272	1.7332	0.361337	0.000157003	0.000982055
ENSDARG00000070447	36.491	2.45028	0.549342	0.000158511	0.000989687
ENSDARG00000017441	103.609	2.81248	0.666094	0.000159281	0.000992688
ENSDARG00000015915	62.7385	2.77725	0.65403	0.000159808	0.00099417
ENSDARG00000102566	61.6292	-2.50131	0.565017	0.000160332	0.000995627
ENSDARG00000036080	60.3002	2.24531	0.491182	0.000161396	0.00100042
ENSDARG00000099256	112.805	-1.68877	0.351598	0.000163521	0.00101164
ENSDARG00000053446	197.114	2.09152	0.450351	0.000163795	0.00101164
ENSDARG00000070866	55.322	2.24013	0.490311	0.000165301	0.0010181
ENSDARG00000013935	53.667	-2.2297	0.487468	0.000165434	0.0010181
ENSDARG00000068436	230.366	2.1168	0.457243	0.000165974	0.00101959
ENSDARG00000057882	25.0199	3.09884	0.775844	0.000166278	0.00101964
ENSDARG00000045490	20.628	3.15731	0.801127	0.000168927	0.00103404
ENSDARG00000020811	64.3987	-1.91799	0.407307	0.000172388	0.00105335
ENSDARG00000075706	466.433	-1.32611	0.271356	0.000176602	0.00107718
ENSDARG00000104458	95.3782	2.67793	0.625159	0.000182193	0.00110931
ENSDARG00000076376	87.8206	-2.44634	0.552139	0.000182957	0.00111199
ENSDARG00000011777	94.718	-1.53277	0.317584	0.000184253	0.00111789
ENSDARG00000101569	593.237	-1.02527	0.207728	0.000185101	0.00111837
ENSDARG00000076283	22.2742	3.02005	0.749541	0.000185228	0.00111837
ENSDARG00000052438	127.445	-1.48642	0.307244	0.000185309	0.00111837
ENSDARG00000097797	42.4052	3.03469	0.757874	0.000194879	0.00117274
ENSDARG00000074079	72.767	-1.53673	0.319234	0.000195001	0.00117274
ENSDARG00000057881	315.737	3.00091	0.744672	0.00019586	0.00117584
ENSDARG00000029370	90.4205	-1.80754	0.38268	0.000197581	0.0011841
ENSDARG00000036316	1626.64	2.31032	0.514569	0.000199686	0.00119464
ENSDARG00000082960	123.456	-1.95132	0.418696	0.000203682	0.00121643
ENSDARG00000039493	35.7128	2.58806	0.599546	0.000204192	0.00121735
ENSDARG00000015592	87.4976	-2.06201	0.447359	0.000206014	0.0012235
ENSDARG00000016153	55.2744	2.3451	0.525435	0.000206225	0.0012235
ENSDARG00000045143	549.415	2.45696	0.558759	0.000206292	0.0012235
ENSDARG00000023495	84.9643	-1.45358	0.301315	0.000207305	0.00122739
ENSDARG00000096118	1008.92	2.83675	0.685212	0.000207755	0.00122794
ENSDARG00000101627	2735.95	-1.73767	0.366902	0.000209702	0.00123732
ENSDARG00000009499	581.993	-1.19876	0.245742	0.000211713	0.00124704
ENSDARG00000019362	13.2821	2.97161	0.73732	0.00021375	0.00125561
ENSDARG00000022438	54.5039	3.1651	0.81815	0.000213899	0.00125561
ENSDARG00000093677	46.1653	3.09731	0.789044	0.000215593	0.00126339
ENSDARG00000031756	583.697	1.3257	0.273676	0.00021933	0.0012831
ENSDARG00000091079	203.911	-1.59637	0.334576	0.000220725	0.00128906
ENSDARG00000018524	325.6	1.69674	0.35812	0.000222408	0.00129669
ENSDARG00000038981	10.3705	3.07767	0.782749	0.000223776	0.00130245
ENSDARG00000104066	128.104	1.9273	0.414585	0.000225902	0.0013126
ENSDARG00000096920	189.377	-1.51785	0.317189	0.000230586	0.00133578
ENSDARG00000037789	1635.07	2.31906	0.520784	0.000230669	0.00133578
ENSDARG00000052840	19.042	3.43893	0.969412	0.000232285	0.00134287
ENSDARG00000070573	38.1196	2.13697	0.47022	0.000235701	0.00136033
ENSDARG00000037867	123.151	3.23315	0.856456	0.000237289	0.0013672
ENSDARG00000079470	66.279	-1.80851	0.386366	0.00024225	0.00139344
ENSDARG00000036944	145.098	-2.00379	0.43557	0.000243175	0.00139643
ENSDARG00000061039	31.9625	2.25527	0.504572	0.000250904	0.0014384
ENSDARG00000043334	38.349	2.4606	0.565663	0.000251327	0.00143843
ENSDARG00000079497	64.3266	-1.93006	0.417374	0.000252348	0.00144171
ENSDARG00000039626	32.1157	2.89636	0.715897	0.000252739	0.00144171
ENSDARG00000020197	236.259	1.80728	0.386866	0.000253828	0.00144551
ENSDARG00000088354	57.2738	-2.01376	0.43925	0.00025655	0.0014586
ENSDARG00000070391	31.9155	2.76484	0.66845	0.000260968	0.00148126
ENSDARG00000101458	127.606	1.8624	0.401184	0.00026398	0.0014936
ENSDARG00000007791	44.7453	2.57332	0.603169	0.000264012	0.0014936
ENSDARG00000101722	110.628	-1.72732	0.368257	0.000266137	0.00150315
ENSDARG00000008867	59.276	2.10984	0.465675	0.000267276	0.00150557
ENSDARG00000009346	270.929	-1.53619	0.323408	0.000267443	0.00150557
ENSDARG00000097157	198.047	2.51864	0.586146	0.000269772	0.0015162
ENSDARG00000104996	12.5685	2.8801	0.712845	0.000271173	0.00152042
ENSDARG00000025326	20.0322	2.94533	0.738387	0.000271409	0.00152042
ENSDARG00000069981	187.52	2.19302	0.48903	0.000272656	0.00152492
ENSDARG00000010680	44.8904	2.62422	0.622292	0.000281351	0.00157099
ENSDARG00000051761	112.116	-1.62778	0.345546	0.000283088	0.00157812
ENSDARG00000105059	23.8199	-2.52864	0.591054	0.000284364	0.00158267
ENSDARG00000055524	20.2462	3.1936	0.849855	0.000285668	0.00158735
ENSDARG00000097528	50.0853	2.32229	0.527439	0.000286193	0.0015877
ENSDARG00000090804	41.4047	-1.91597	0.41689	0.000296756	0.00164365
ENSDARG00000056099	14.9824	3.05931	0.790956	0.000299015	0.00164787
ENSDARG00000080562	140.001	-1.77507	0.381809	0.000299278	0.00164787
ENSDARG00000075709	42.0376	2.29652	0.521062	0.000299532	0.00164787
ENSDARG00000003068	22.3578	2.71343	0.655554	0.000299848	0.00164787
ENSDARG00000003877	92.747	-1.64523	0.350551	0.000299917	0.00164787
ENSDARG00000068143	118.084	-1.53928	0.325919	0.000304026	0.00166777
ENSDARG00000013351	742.592	1.45006	0.305543	0.000306698	0.00167975
ENSDARG00000038905	154.451	-1.48414	0.31336	0.000307348	0.00168055
ENSDARG00000021739	38.638	-1.79931	0.388264	0.000307823	0.00168055
ENSDARG00000077304	77.2493	-1.89393	0.412057	0.000309111	0.00168388
ENSDARG00000011055	22.3095	2.65117	0.634926	0.000309414	0.00168388
ENSDARG00000039117	384.286	-1.18249	0.246155	0.000312349	0.00169716
ENSDARG00000006878	137.441	-1.36943	0.287623	0.00031453	0.00170631
ENSDARG00000062148	441.404	-1.66426	0.355946	0.000316998	0.00171699
ENSDARG00000008322	113.492	-1.48397	0.313944	0.000321876	0.00174066
ENSDARG00000031164	114.549	2.79616	0.688756	0.000323053	0.00174341
ENSDARG00000090697	60.3636	2.7139	0.658746	0.000323905	0.00174341
ENSDARG00000071336	19.3622	2.75236	0.672708	0.000324232	0.00174341
ENSDARG00000004634	235.017	-1.81339	0.392689	0.000324415	0.00174341
ENSDARG00000062933	65.9688	2.18582	0.491964	0.000334548	0.00179506
ENSDARG00000042056	52.7783	2.97708	0.762068	0.000335279	0.00179618
ENSDARG00000102878	74.745	2.06799	0.45943	0.000336021	0.00179735
ENSDARG00000103364	136.96	2.35032	0.540447	0.000338138	0.00180586
ENSDARG00000008237	154.666	1.9377	0.42516	0.000340161	0.00181384
ENSDARG00000104814	15.1017	3.29627	0.917872	0.000341498	0.00181815
ENSDARG00000023627	491.58	-1.36035	0.286626	0.000342533	0.00182083
ENSDARG00000028581	46.0548	2.80162	0.693525	0.000343971	0.00182565
ENSDARG00000000086	138.768	-1.3867	0.292691	0.000345674	0.00183186
ENSDARG00000099358	38.9674	2.43875	0.569554	0.000357937	0.00189392
ENSDARG00000076836	185.26	2.16837	0.488814	0.00035991	0.0018973
ENSDARG00000035880	36.6049	2.9232	0.743438	0.000360004	0.0018973
ENSDARG00000020123	158.849	-1.23971	0.260264	0.000360232	0.0018973
ENSDARG00000077037	120.247	-1.51795	0.323423	0.000361626	0.00190172
ENSDARG00000055874	683.822	-0.94431	0.196189	0.000366332	0.00192352
ENSDARG00000029291	76.7887	-1.55278	0.331933	0.000370884	0.00194445
ENSDARG00000105214	168.968	-1.91369	0.421182	0.000380715	0.00199295
ENSDARG00000051754	48.7526	-1.82833	0.399875	0.00039161	0.00204686
ENSDARG00000086169	58.6643	-1.50271	0.321156	0.000395841	0.00206583
ENSDARG00000071524	77.4488	-1.41655	0.301298	0.000397664	0.0020722
ENSDARG00000052016	125.682	-1.67839	0.363119	0.000400403	0.00208331
ENSDARG00000071518	148.956	-1.43941	0.306685	0.000401642	0.0020866
ENSDARG00000069422	24.576	3.01952	0.79131	0.000407679	0.00211476
ENSDARG00000038666	851.502	-1.77113	0.386699	0.000418117	0.00216563
ENSDARG00000007276	109.448	2.82204	0.710408	0.000419978	0.002172
ENSDARG00000041086	48.8229	-1.76618	0.385687	0.000423356	0.00218617
ENSDARG00000013390	60.1614	-1.86624	0.411209	0.00042741	0.00220379
ENSDARG00000105098	13.0411	2.88582	0.737464	0.000433057	0.00222638
ENSDARG00000001889	367.885	2.54898	0.61206	0.000433087	0.00222638
ENSDARG00000096721	38.0554	2.78876	0.69926	0.000436882	0.00224253
ENSDARG00000091631	16.6837	2.68461	0.660522	0.000440888	0.00225971
ENSDARG00000004748	165.158	-1.59889	0.345603	0.000444168	0.00227314
ENSDARG00000045132	397.598	2.0608	0.463841	0.000445336	0.00227572
ENSDARG00000035329	90.3185	2.28651	0.52922	0.000450466	0.00229851
ENSDARG00000053152	76.3704	-1.50737	0.32425	0.000455132	0.00231888
ENSDARG00000011208	24.385	2.62056	0.639298	0.000461788	0.0023493
ENSDARG00000005230	168.172	2.15836	0.492602	0.000470165	0.00238838
ENSDARG00000038040	18.2255	3.18593	0.88289	0.00047228	0.00239558
ENSDARG00000029476	63.6057	-1.75475	0.384874	0.000474522	0.00239815
ENSDARG00000020298	31.161	2.4912	0.595818	0.00047499	0.00239815
ENSDARG00000079889	156.193	-2.24154	0.517219	0.00047535	0.00239815
ENSDARG00000002231	42.6643	-2.12194	0.482493	0.000475579	0.00239815
ENSDARG00000097441	15.8562	3.1592	0.87103	0.000487823	0.00245628
ENSDARG00000025468	44.5564	-2.02579	0.456509	0.000492266	0.00247502
ENSDARG00000039578	90.9208	2.47337	0.591193	0.000493632	0.00247826
ENSDARG00000061042	58.5649	-1.88329	0.418723	0.000499699	0.00250506
ENSDARG00000025034	63.4333	2.03766	0.460217	0.000501932	0.00251259
ENSDARG00000103994	563.173	1.89043	0.420887	0.000507076	0.00253464
ENSDARG00000100510	64.5555	2.36993	0.558628	0.000508891	0.00254001
ENSDARG00000102586	21.7458	2.6669	0.660022	0.00051027	0.00254321
ENSDARG00000034667	126.016	-1.6001	0.34829	0.000516886	0.00257244
ENSDARG00000042667	17.3624	3.07507	0.832535	0.000518873	0.00257661
ENSDARG00000033804	55.2533	1.78761	0.394825	0.000519395	0.00257661
ENSDARG00000098600	16.2122	3.11941	0.854991	0.000519974	0.00257661
ENSDARG00000098724	88.3662	1.69149	0.37102	0.000528493	0.00261505
ENSDARG00000030694	103.311	2.07385	0.471556	0.000530024	0.00261885
ENSDARG00000071076	159.09	-1.88468	0.420431	0.000533913	0.00263428
ENSDARG00000099532	43.0394	1.94704	0.437059	0.000536226	0.00264189
ENSDARG00000062983	73.6977	-1.70102	0.373884	0.000543813	0.00267543
ENSDARG00000097902	13.9521	3.26203	0.94087	0.000544746	0.00267619
ENSDARG00000062794	38.7891	2.63399	0.652056	0.00056407	0.00276717
ENSDARG00000045850	22.766	2.5637	0.626978	0.000566056	0.00277295
ENSDARG00000009844	14.9063	3.30511	0.977273	0.000576703	0.00281833
ENSDARG00000021346	449.489	-1.65165	0.362683	0.000577004	0.00281833
ENSDARG00000098451	26.6758	2.57084	0.630281	0.000577782	0.00281833
ENSDARG00000014962	206.853	-1.20968	0.258879	0.000578838	0.00281947
ENSDARG00000033327	90.3403	-1.67397	0.368542	0.000588585	0.00286289
ENSDARG00000053070	112.819	-1.60892	0.352621	0.000591731	0.00287412
ENSDARG00000103672	697.112	1.33817	0.288515	0.000594375	0.00288289
ENSDARG00000043402	13.126	3.14903	0.882035	0.000600883	0.00290962
ENSDARG00000094204	35.3072	-1.85382	0.414763	0.000601581	0.00290962
ENSDARG00000093303	118.651	-1.51644	0.330563	0.000602592	0.00291041
ENSDARG00000055115	37.2015	2.39434	0.572027	0.000606236	0.00292389
ENSDARG00000020176	49.2323	-1.98675	0.4506	0.000608022	0.0029284
ENSDARG00000104049	244.999	2.08317	0.477668	0.000611663	0.00293913
ENSDARG00000074431	258.14	-1.64988	0.363245	0.000611962	0.00293913
ENSDARG00000001888	182.349	-1.73411	0.38437	0.000614349	0.00294647
ENSDARG00000037488	663.603	1.96639	0.445438	0.000619056	0.00296491
ENSDARG00000039034	482.642	1.38654	0.300368	0.000623205	0.00298062
ENSDARG00000004343	62.2244	1.73974	0.38625	0.000629695	0.00300747
ENSDARG00000056877	228.687	1.7664	0.393348	0.000640025	0.00305257
ENSDARG00000079283	21.8109	-2.43004	0.585709	0.000642073	0.00305808
ENSDARG00000101021	27.868	-2.27611	0.53631	0.000643574	0.00306099
ENSDARG00000008966	250.918	-1.52359	0.333454	0.000650645	0.00309034
ENSDARG00000079639	233.58	-1.45702	0.317696	0.000657003	0.00311623
ENSDARG00000091655	9.79335	3.26186	0.961776	0.000661961	0.00313541
ENSDARG00000026759	63.5094	-1.88223	0.424427	0.000668178	0.0031605
ENSDARG00000018600	11.0585	3.0475	0.836569	0.000669959	0.00316457
ENSDARG00000032614	119.96	2.15697	0.501527	0.000673273	0.00317373
ENSDARG00000100494	142.114	1.94978	0.442799	0.000673747	0.00317373
ENSDARG00000092467	177.856	2.20101	0.515312	0.000689191	0.00324203
ENSDARG00000060029	17.0154	2.90632	0.772217	0.000698803	0.00328275
ENSDARG00000042010	301.858	2.04845	0.471207	0.000702526	0.00329573
ENSDARG00000058117	142.667	1.70499	0.379488	0.000703743	0.00329694
ENSDARG00000078087	70.2982	-1.40118	0.305507	0.000705319	0.00329982
ENSDARG00000033382	67.7349	2.37593	0.571162	0.000709446	0.00331461
ENSDARG00000003058	22.1927	3.07253	0.854857	0.000720512	0.00336174
ENSDARG00000077372	51.8452	2.77297	0.717044	0.000724331	0.00337497
ENSDARG00000082716	21.3186	2.79798	0.728721	0.000743347	0.00345827
ENSDARG00000023900	56.407	-1.90063	0.431663	0.000744222	0.00345827
ENSDARG00000076867	48.6831	-1.77386	0.398319	0.000750066	0.00347986
ENSDARG00000070873	199.505	3.19089	0.927083	0.000750897	0.00347986
ENSDARG00000056549	39.9892	2.81144	0.735666	0.000761722	0.00352527
ENSDARG00000041417	132.276	1.94908	0.445808	0.000776474	0.00358871
ENSDARG00000008575	115.46	-1.66625	0.371556	0.000779435	0.00359755
ENSDARG00000043856	129.327	2.08902	0.48552	0.000781216	0.00360093
ENSDARG00000053370	122.845	2.12181	0.495301	0.000786714	0.00362142
ENSDARG00000105435	76.8037	-2.02028	0.466074	0.000789593	0.0036298
ENSDARG00000019778	1310.56	1.48049	0.326107	0.000792595	0.00363873
ENSDARG00000098237	54.4049	-2.23526	0.529968	0.000797416	0.00365598
ENSDARG00000077162	24.6421	2.5758	0.645265	0.000805374	0.00368754
ENSDARG00000017886	68.9986	-1.55263	0.343935	0.000807572	0.00369021
ENSDARG00000099283	344.045	1.67187	0.373624	0.000808107	0.00369021
ENSDARG00000035327	173.542	1.97388	0.453967	0.000820933	0.0037438
ENSDARG00000008976	581.963	-1.05659	0.228208	0.000822595	0.00374641
ENSDARG00000055162	126.931	-1.61624	0.360006	0.00082426	0.00374902
ENSDARG00000079313	300.089	-1.14944	0.249406	0.000836799	0.00380102
ENSDARG00000074758	344.045	1.73027	0.389328	0.000843733	0.00382745
ENSDARG00000044719	178.418	2.56324	0.643163	0.000856479	0.00387645
ENSDARG00000095147	40.3335	3.35325	1.10494	0.000856793	0.00387645
ENSDARG00000078416	96.459	-1.2532	0.273656	0.000865697	0.00391046
ENSDARG00000101143	24.5581	-2.31355	0.557349	0.000866588	0.00391046
ENSDARG00000071396	62.7941	2.01652	0.467591	0.000877614	0.00395502
ENSDARG00000040407	65.5758	1.48907	0.329989	0.00089084	0.00400936
ENSDARG00000020574	176.127	1.62238	0.362965	0.000894256	0.00401947
ENSDARG00000044861	52.6384	2.98512	0.826342	0.000905353	0.00406383
ENSDARG00000028533	738.395	-1.19629	0.261067	0.000906492	0.00406383
ENSDARG00000076799	67.3256	2.4368	0.600435	0.000912801	0.00408678
ENSDARG00000057936	11.4602	2.99846	0.833921	0.000915029	0.00409142
ENSDARG00000028517	343.077	1.79397	0.407748	0.000924016	0.00412623
ENSDARG00000031317	472.555	1.86164	0.426031	0.000932566	0.004159
ENSDARG00000039269	449.8	-1.33758	0.294463	0.000938211	0.00417875
ENSDARG00000075282	371.114	-1.1566	0.252383	0.00094094	0.00418513
ENSDARG00000078535	94.1769	-1.51046	0.336095	0.00094208	0.00418513
ENSDARG00000100139	45.2241	2.59405	0.659219	0.000953	0.00422817
ENSDARG00000021113	814.295	1.43953	0.319095	0.000957086	0.00424038
ENSDARG00000007745	102.887	2.12009	0.500111	0.000958222	0.00424038
ENSDARG00000055901	11.9872	3.00852	0.842801	0.000961012	0.00424725
ENSDARG00000089963	23.9678	2.88754	0.783062	0.000964523	0.00425729
ENSDARG00000035958	75.7027	2.53111	0.636736	0.000977112	0.00430732
ENSDARG00000063095	190.859	2.19987	0.525529	0.000995091	0.00438095
ENSDARG00000052072	29.5655	-2.39306	0.588588	0.000997723	0.00438691
ENSDARG00000017386	259.621	-1.52016	0.339469	0.00100154	0.00439805
ENSDARG00000076060	92.7914	-1.14633	0.250857	0.00101144	0.00443586
ENSDARG00000037815	106.995	-1.78232	0.406668	0.00101878	0.00446236
ENSDARG00000006008	201.412	-1.52118	0.340065	0.00102276	0.00447364
ENSDARG00000060532	127.836	-1.65989	0.374909	0.00102396	0.00447364
ENSDARG00000052606	73.1723	-1.68677	0.382078	0.00103874	0.00453243
ENSDARG00000013144	341.479	1.55032	0.347592	0.00104185	0.00454023
ENSDARG00000054973	634.8	-1.02546	0.223683	0.00105056	0.00457238
ENSDARG00000075513	111.058	-1.47978	0.330411	0.00105647	0.00459232
ENSDARG00000026582	61.1457	2.59398	0.664395	0.00107248	0.00465601
ENSDARG00000038693	15.142	2.93706	0.814091	0.00107392	0.00465638
ENSDARG00000096632	34.8706	2.17516	0.52016	0.00107583	0.00465877
ENSDARG00000041381	241.517	-1.23734	0.272893	0.00109145	0.00472047
ENSDARG00000058463	23.4737	2.86073	0.778371	0.00109409	0.00472591
ENSDARG00000009735	406.529	-1.1222	0.246374	0.00111018	0.00478938
ENSDARG00000041592	55.0035	2.6256	0.678583	0.00111646	0.00481043
ENSDARG00000060081	201.252	-1.33838	0.297143	0.00112209	0.00482651
ENSDARG00000052465	101.153	-1.59097	0.359073	0.001123	0.00482651
ENSDARG00000008735	112.254	2.74526	0.728469	0.00112949	0.00484833
ENSDARG00000093851	82.8131	-1.74753	0.399879	0.00114666	0.00491588
ENSDARG00000098810	84.7391	2.0664	0.489196	0.00115592	0.00494942
ENSDARG00000053301	18.0241	2.59825	0.669829	0.001166	0.00498636
ENSDARG00000092493	81.5495	2.27499	0.554785	0.00117875	0.0050346
ENSDARG00000059327	158.453	-1.43457	0.321215	0.00118897	0.00507195
ENSDARG00000069056	142.723	-1.4361	0.321653	0.00119395	0.0050869
ENSDARG00000078001	34.3113	-2.20797	0.533727	0.00119949	0.00510416
ENSDARG00000005754	237.581	1.21212	0.268369	0.0012171	0.00517266
ENSDARG00000078134	67.0484	3.23039	1.02111	0.00122473	0.00519867
ENSDARG00000014746	248.159	1.7643	0.406019	0.00124439	0.00527558
ENSDARG00000063672	62.0356	-1.69263	0.387794	0.00129003	0.00545825
ENSDARG00000100697	281.223	1.92291	0.450439	0.00129178	0.00545825
ENSDARG00000034734	22.6506	2.46977	0.625616	0.00129291	0.00545825
ENSDARG00000009252	62.4576	-1.32286	0.295443	0.00129383	0.00545825
ENSDARG00000042249	242.311	-1.7316	0.398205	0.00129898	0.00547326
ENSDARG00000034105	304.836	-1.20119	0.266701	0.00130668	0.00549896
ENSDARG00000014571	143.07	1.8505	0.43071	0.00132011	0.00554864
ENSDARG00000013822	39.8253	2.37557	0.59324	0.00133857	0.00561936
ENSDARG00000007438	85.5668	1.9266	0.452478	0.0013458	0.00564282
ENSDARG00000056008	67.9129	2.58984	0.673326	0.00135105	0.00565764
ENSDARG00000092947	420.085	3.2048	1.01232	0.00135263	0.00565764
ENSDARG00000079274	95.6575	2.81746	0.772333	0.00137515	0.00574487
ENSDARG00000077107	19.8504	-2.10651	0.506236	0.00137984	0.00575742
ENSDARG00000053858	27.4207	2.67499	0.709345	0.0013846	0.0057703
ENSDARG00000014196	85.6736	2.64962	0.699051	0.00139305	0.00579847
ENSDARG00000059707	85.0102	-1.52487	0.346249	0.0013988	0.0058143
ENSDARG00000077777	3515.47	1.98301	0.46971	0.00140024	0.0058143
ENSDARG00000081103	31.059	3.01411	0.876998	0.00140676	0.00582813
ENSDARG00000040764	55.431	2.54273	0.656715	0.00140697	0.00582813
ENSDARG00000027140	21.2577	-2.35126	0.587255	0.00143186	0.00592412
ENSDARG00000036943	65.583	-1.38084	0.311016	0.00143758	0.00593399
ENSDARG00000004745	14.6694	2.5845	0.67412	0.0014377	0.00593399
ENSDARG00000053656	43.9626	2.35368	0.588336	0.00144118	0.00594117
ENSDARG00000042133	51.366	2.58265	0.674382	0.0014685	0.00604657
ENSDARG00000045074	61.3901	-1.78109	0.414177	0.00147579	0.00606931
ENSDARG00000045514	50.108	2.33897	0.58428	0.00148312	0.00609215
ENSDARG00000093207	25.5711	-2.16575	0.527149	0.00149635	0.00613916
ENSDARG00000104264	27.8821	-2.0804	0.50069	0.00150288	0.0061519
ENSDARG00000016263	69.186	1.86237	0.437002	0.00150304	0.0061519
ENSDARG00000043448	129.298	1.65791	0.38197	0.00152342	0.0062279
ENSDARG00000027978	138.685	-1.65898	0.3824	0.00153516	0.00626841
ENSDARG00000105147	78.1094	-1.36624	0.308509	0.00154132	0.00628608
ENSDARG00000053829	14.2375	2.86635	0.804015	0.00154847	0.00630778
ENSDARG00000099430	62.6192	2.13178	0.517534	0.0015517	0.00631345
ENSDARG00000089138	133.195	-1.56363	0.358039	0.00156273	0.0063508
ENSDARG00000035907	281.786	2.1225	0.514951	0.00156852	0.0063659
ENSDARG00000056414	32.8748	2.26199	0.560086	0.00157016	0.0063659
ENSDARG00000101561	227.205	-1.54672	0.353896	0.00157791	0.00638979
ENSDARG00000029907	23.4261	-1.884	0.444342	0.00158415	0.00640749
ENSDARG00000033993	38.8553	-2.19048	0.536926	0.0015873	0.00641271
ENSDARG00000075570	89.2991	-1.47817	0.336819	0.00160128	0.00646157
ENSDARG00000104869	53.898	-2.03594	0.489254	0.00161712	0.0065166
ENSDARG00000038076	102.99	2.23979	0.553719	0.00161871	0.0065166
ENSDARG00000074435	92.3993	-1.55981	0.357734	0.00162161	0.00652061
ENSDARG00000102333	86.4029	2.3344	0.586301	0.00163611	0.00657123
ENSDARG00000012519	187.111	-1.22668	0.275799	0.00165296	0.00663116
ENSDARG00000099014	19.0539	2.78698	0.769678	0.00165749	0.00664156
ENSDARG00000008398	88.0621	-1.43247	0.326095	0.00166992	0.00668357
ENSDARG00000045898	32.2631	2.06788	0.499912	0.00167209	0.00668445
ENSDARG00000032405	191.023	1.98674	0.475508	0.00167507	0.00668859
ENSDARG00000097706	14.7201	2.70274	0.731783	0.00167833	0.00669381
ENSDARG00000075850	20.2678	-1.88649	0.446562	0.00168612	0.00671708
ENSDARG00000031387	112.561	-1.90613	0.452228	0.00168954	0.00672294
ENSDARG00000011175	99.7267	1.7228	0.40139	0.00169583	0.00674012
ENSDARG00000092610	27.3459	2.70376	0.733287	0.0017097	0.00678741
ENSDARG00000086269	150.901	-1.71291	0.398956	0.00171411	0.00679705
ENSDARG00000076978	15.2829	2.89343	0.825951	0.00172517	0.00683302
ENSDARG00000038185	26.9893	3.04923	0.919646	0.0017334	0.00685773
ENSDARG00000078075	17.6064	2.69792	0.731788	0.00174305	0.00688794
ENSDARG00000100255	46.6799	-1.92783	0.459334	0.00174707	0.0068959
ENSDARG00000079374	183.887	-1.20893	0.272311	0.00174927	0.00689659
ENSDARG00000002230	89.5212	1.65623	0.38431	0.00175312	0.00689659
ENSDARG00000029445	42.7585	2.259	0.562899	0.0017539	0.00689659
ENSDARG00000102372	85.4119	-1.86208	0.440602	0.00175528	0.00689659
ENSDARG00000000796	30.748	-2.10884	0.514255	0.00176745	0.00693046
ENSDARG00000004956	67.2595	1.84688	0.436507	0.00176987	0.00693046
ENSDARG00000003695	254.533	1.80031	0.423497	0.00176995	0.00693046
ENSDARG00000062973	59.3277	2.1106	0.515062	0.0017824	0.00696562
ENSDARG00000095817	75.1075	-1.49863	0.343824	0.00178299	0.00696562
ENSDARG00000045296	62.2553	2.50722	0.653651	0.00178563	0.00696801
ENSDARG00000046007	43.0829	-1.78436	0.419323	0.00178853	0.00697142
ENSDARG00000079352	49.5276	-1.96513	0.47098	0.00179667	0.00699518
ENSDARG00000053113	127.319	-1.41808	0.323819	0.00180996	0.00703895
ENSDARG00000061023	73.6498	-1.75979	0.412908	0.00181585	0.00705388
ENSDARG00000102995	31.4824	2.24995	0.561343	0.0018313	0.00710584
ENSDARG00000045228	78.2363	2.04198	0.494647	0.00183516	0.0071114
ENSDARG00000060372	95.928	-1.57506	0.363981	0.00183852	0.0071114
ENSDARG00000103505	23.1344	2.51711	0.658881	0.00183894	0.0071114
ENSDARG00000099351	207.43	2.19016	0.541673	0.00184364	0.00712156
ENSDARG00000037392	39.3435	2.35953	0.599982	0.0018555	0.0071593
ENSDARG00000038954	91.8415	-2.17667	0.537642	0.00186522	0.00718106
ENSDARG00000059816	18.6774	2.54091	0.669024	0.00186532	0.00718106
ENSDARG00000074583	39.5978	-1.72701	0.405032	0.00190685	0.00732474
ENSDARG00000069168	90.072	-1.75453	0.412549	0.00190693	0.00732474
ENSDARG00000100908	208.436	-1.49071	0.343004	0.00190904	0.00732474
ENSDARG00000098957	58.0662	3.14565	1.01429	0.00193323	0.00740927
ENSDARG00000078452	37.6323	-1.55432	0.359579	0.00193648	0.00740937
ENSDARG00000021987	787.066	-1.25114	0.28386	0.00193757	0.00740937
ENSDARG00000103682	85.4094	1.98595	0.479583	0.00196451	0.00749894
ENSDARG00000052746	112.269	2.44398	0.633535	0.00196536	0.00749894
ENSDARG00000101309	106.74	-1.6237	0.378036	0.00196995	0.0075081
ENSDARG00000054213	820.91	-1.16523	0.263486	0.00197875	0.00753328
ENSDARG00000078088	92.9948	-1.60943	0.374605	0.00200316	0.00761778
ENSDARG00000027497	33.0427	-1.95213	0.470229	0.00201874	0.00766461
ENSDARG00000036894	43.0993	2.57657	0.687511	0.00201994	0.00766461
ENSDARG00000006588	69.4979	2.57052	0.685153	0.00202609	0.00767947
ENSDARG00000057789	25.6029	2.99793	0.902056	0.00203645	0.00771022
ENSDARG00000040287	1008.86	-1.27458	0.290432	0.00206016	0.00779139
ENSDARG00000051816	56.2442	-1.4874	0.343585	0.00207001	0.00782005
ENSDARG00000092870	82.577	2.32594	0.592603	0.00209166	0.00789315
ENSDARG00000103403	44.5672	2.11058	0.520272	0.00211219	0.00796188
ENSDARG00000010745	48.1882	1.81109	0.430667	0.00211703	0.00797136
ENSDARG00000040874	122.254	1.89003	0.453289	0.00212033	0.00797506
ENSDARG00000059057	23.1015	2.72115	0.754695	0.00214322	0.00805233
ENSDARG00000056186	61.1004	2.32256	0.592719	0.00216449	0.00812336
ENSDARG00000041223	13.9512	2.62329	0.711349	0.0021773	0.00815355
ENSDARG00000002593	60.8277	2.81113	0.799998	0.0021777	0.00815355
ENSDARG00000027236	108.153	2.58195	0.693672	0.00217966	0.00815355
ENSDARG00000019732	52.2021	2.425	0.630865	0.0021831	0.00815754
ENSDARG00000038615	84.4451	1.94258	0.469849	0.00221256	0.00825291
ENSDARG00000068680	101.647	2.81067	0.80093	0.00221343	0.00825291
ENSDARG00000003008	54.6112	1.87371	0.449978	0.00224283	0.00835346
ENSDARG00000035625	25.6268	2.17853	0.544573	0.0022573	0.00839823
ENSDARG00000018192	605.828	1.35274	0.311329	0.00229301	0.00852071
ENSDARG00000017798	106.944	-1.59827	0.37434	0.00229518	0.00852071
ENSDARG00000003429	255.264	-1.59362	0.373249	0.00231117	0.00857081
ENSDARG00000052304	60.9081	2.27323	0.577887	0.00232027	0.00859525
ENSDARG00000080010	103.654	2.26809	0.57617	0.00232546	0.0086052
ENSDARG00000062592	61.097	2.35658	0.607965	0.00232842	0.00860689
ENSDARG00000017049	16.0917	2.34604	0.604293	0.00233975	0.00863946
ENSDARG00000022165	31.9086	2.65084	0.728534	0.00237777	0.00877043
ENSDARG00000053862	145.666	3.07732	0.983015	0.00239747	0.00883361
ENSDARG00000008829	72.1883	2.01336	0.493595	0.00240091	0.0088368
ENSDARG00000105323	61.107	2.15076	0.537647	0.00241582	0.00888214
ENSDARG00000006497	274.029	1.89154	0.457216	0.00242808	0.00891766
ENSDARG00000007480	109.156	2.01163	0.493536	0.00244054	0.00895386
ENSDARG00000076888	115.294	-1.56775	0.367554	0.00244925	0.00897622
ENSDARG00000032072	172.548	-1.6413	0.387423	0.0024814	0.00908436
ENSDARG00000043102	74.1517	2.2468	0.571566	0.00251027	0.00918025
ENSDARG00000057676	22.7072	2.4779	0.657954	0.00251513	0.00918823
ENSDARG00000078751	259.682	-1.25557	0.289192	0.00260461	0.00949695
ENSDARG00000016904	27.28	2.53994	0.685192	0.00260516	0.00949695
ENSDARG00000101813	542.811	1.06293	0.242549	0.00261688	0.00952956
ENSDARG00000043902	39.7804	-1.92632	0.469612	0.00262429	0.00954642
ENSDARG00000038153	116.015	2.32644	0.601875	0.00263221	0.0095534
ENSDARG00000104596	59.5206	2.21735	0.563109	0.00263374	0.0095534
ENSDARG00000004296	42.9156	2.02731	0.500682	0.00263456	0.0095534
ENSDARG00000019060	30.6931	2.01357	0.497182	0.00270605	0.0098023
ENSDARG00000032765	148.291	1.5408	0.362576	0.00273292	0.00988395
ENSDARG00000060065	487.249	-1.03465	0.236324	0.00273435	0.00988395
ENSDARG00000032705	317.177	-0.971864	0.221529	0.00276293	0.00997677
ENSDARG00000003446	81.61	-1.60209	0.379122	0.00276595	0.00997718
ENSDARG00000104682	258.221	1.96006	0.48133	0.00276993	0.00998104
ENSDARG00000076584	116.301	-1.62703	0.385901	0.00277389	0.00998486
ENSDARG00000034326	107.428	1.88145	0.457807	0.0027813	0.010001
ENSDARG00000043848	144.823	1.80432	0.435395	0.00278847	0.0100163
ENSDARG00000068030	92.0256	-1.45603	0.341054	0.00282286	0.0101293
ENSDARG00000102417	52.2821	1.78935	0.43144	0.00282676	0.0101327
ENSDARG00000059483	29.4151	2.07369	0.517682	0.00283336	0.0101457
ENSDARG00000042777	47.5468	2.29814	0.595239	0.00288618	0.0103241
ENSDARG00000082123	76.3987	2.31314	0.600826	0.00289278	0.0103292
ENSDARG00000007708	1156.65	-0.836638	0.190216	0.00289363	0.0103292
ENSDARG00000020956	18.5298	2.69733	0.763526	0.00293953	0.0104822
ENSDARG00000012125	29.3851	2.84093	0.839705	0.00294406	0.0104875
ENSDARG00000036175	391.085	-1.27512	0.295911	0.00295113	0.0104964
ENSDARG00000069790	98.1079	2.17483	0.552615	0.0029527	0.0104964
ENSDARG00000015222	11.0756	2.79483	0.814831	0.00298026	0.0105835
ENSDARG00000031435	67.3511	2.40911	0.639022	0.00300988	0.0106776
ENSDARG00000058047	33.8447	2.56866	0.705354	0.00301322	0.0106784
ENSDARG00000018460	53.7142	2.03643	0.507738	0.00302033	0.0106926
ENSDARG00000054814	154.661	-1.55973	0.369695	0.00303971	0.0107501
ENSDARG00000055080	172.033	1.55454	0.368397	0.00305327	0.0107804
ENSDARG00000061651	35.113	-1.9114	0.469291	0.00305456	0.0107804
ENSDARG00000043553	121.635	-1.5179	0.358729	0.00306155	0.010794
ENSDARG00000027813	91.9902	1.69226	0.406024	0.00307317	0.0108239
ENSDARG00000052907	178.829	2.27476	0.589678	0.0031072	0.0109325
ENSDARG00000059812	129.229	-1.38701	0.325026	0.00311356	0.0109437
ENSDARG00000005799	39.0052	2.82619	0.837299	0.00316386	0.0111091
ENSDARG00000011404	31.681	-1.67496	0.401902	0.0031679	0.0111119
ENSDARG00000057853	190.26	1.89592	0.465829	0.00319118	0.0111714
ENSDARG00000100013	351.294	-0.863177	0.197383	0.00319136	0.0111714
ENSDARG00000074481	65.8523	-1.60018	0.381761	0.00322044	0.0112513
ENSDARG00000009031	125.807	-1.31593	0.307521	0.00322074	0.0112513
ENSDARG00000036626	137.087	-1.45609	0.343564	0.00323731	0.0112977
ENSDARG00000036164	70.0429	1.55707	0.370326	0.00324962	0.0113291
ENSDARG00000074129	24.4897	2.14461	0.545861	0.00326324	0.0113649
ENSDARG00000038432	51.4554	2.07824	0.523759	0.00326649	0.0113649
ENSDARG00000068128	174.716	-1.82524	0.445518	0.00327453	0.0113813
ENSDARG00000101279	25.1999	-1.77466	0.430933	0.00328826	0.0114093
ENSDARG00000068912	39.4356	2.54414	0.699439	0.00328924	0.0114093
ENSDARG00000078953	175.454	-1.49879	0.355289	0.00332787	0.0115279
ENSDARG00000026967	36.7749	2.49094	0.677232	0.00333015	0.0115279
ENSDARG00000041332	16.4935	2.84035	0.85114	0.00336921	0.0116472
ENSDARG00000076120	232.024	1.536	0.365426	0.00337137	0.0116472
ENSDARG00000024954	16.3828	2.40061	0.641198	0.003393	0.0117101
ENSDARG00000045359	18.4007	2.49779	0.681872	0.00344292	0.0118705
ENSDARG00000036593	417.252	-0.943352	0.21719	0.00344722	0.0118734
ENSDARG00000053133	64.3731	-1.55537	0.371349	0.00349573	0.0120284
ENSDARG00000036168	151.541	-1.55911	0.372383	0.00350026	0.0120319
ENSDARG00000044684	279.077	2.80271	0.832474	0.00350727	0.0120323
ENSDARG00000063522	38.547	-1.98298	0.495372	0.00350738	0.0120323
ENSDARG00000100823	51.3002	1.80913	0.442626	0.00351546	0.012048
ENSDARG00000025348	56.541	2.20652	0.570184	0.00353015	0.0120808
ENSDARG00000079110	116.184	-1.10863	0.257395	0.00353208	0.0120808
ENSDARG00000043802	11.4875	2.68392	0.770013	0.00357135	0.012203
ENSDARG00000070545	242.356	1.91541	0.474957	0.00357857	0.0122155
ENSDARG00000055389	252.752	1.297	0.304471	0.00358767	0.0122344
ENSDARG00000035129	21.0926	2.60557	0.732416	0.00359431	0.0122449
ENSDARG00000097897	208.421	1.47744	0.351234	0.00361469	0.0123021
ENSDARG00000089390	75.991	-1.67713	0.405569	0.00362602	0.0123285
ENSDARG00000045006	123.636	-1.37299	0.324266	0.00367089	0.0124601
ENSDARG00000001549	108.489	-1.36784	0.322944	0.003672	0.0124601
ENSDARG00000045677	416.589	2.12109	0.542135	0.00368403	0.0124886
ENSDARG00000070620	57.1548	-1.65702	0.400408	0.00369997	0.0125303
ENSDARG00000102773	106.75	-1.24157	0.291012	0.00370753	0.0125435
ENSDARG00000077207	79.5201	-1.48252	0.353202	0.00373393	0.0126204
ENSDARG00000053502	42.6388	2.55271	0.710882	0.00376488	0.0127125
ENSDARG00000036670	26.1818	2.48425	0.680947	0.00377449	0.0127324
ENSDARG00000103054	114.162	-1.9121	0.475703	0.00380594	0.0128259
ENSDARG00000007359	7.05157	2.92642	0.921356	0.00381025	0.0128278
ENSDARG00000038465	58.6214	-1.62767	0.392944	0.0038156	0.0128333
ENSDARG00000021201	8.66785	-2.60121	0.734366	0.00383457	0.0128845
ENSDARG00000094910	28.0819	2.75981	0.815621	0.00384032	0.0128912
ENSDARG00000097328	53.2481	-1.78054	0.436603	0.00385176	0.0129065
ENSDARG00000083528	7.5835	3.00986	0.996211	0.00385241	0.0129065
ENSDARG00000005738	74.7008	1.73031	0.422196	0.00387197	0.0129594
ENSDARG00000007788	160.584	1.96829	0.493792	0.00387872	0.0129694
ENSDARG00000045808	78.7523	2.66072	0.764411	0.00389992	0.0130275
ENSDARG00000098670	106.954	2.09099	0.534144	0.00392223	0.0130894
ENSDARG00000054442	53.8614	2.0917	0.534585	0.00394524	0.0131534
ENSDARG00000044954	205.623	-1.66217	0.403751	0.00402164	0.0133951
ENSDARG00000017929	183.286	-0.979405	0.227663	0.00404197	0.0134497
ENSDARG00000039827	72.5496	-1.61584	0.391027	0.0040579	0.0134897
ENSDARG00000070658	90.1548	-1.65194	0.401123	0.00406455	0.0134987
ENSDARG00000100075	327.529	-1.62982	0.394973	0.00406951	0.0135021
ENSDARG00000077581	99.2379	-1.26208	0.297791	0.00410874	0.0136191
ENSDARG00000043795	239.771	1.73406	0.424774	0.00411595	0.0136299
ENSDARG00000015732	45.2435	-1.8098	0.447068	0.004135	0.0136684
ENSDARG00000103747	59.9655	1.82287	0.450965	0.00413554	0.0136684
ENSDARG00000003998	6.3489	2.69768	0.787782	0.00414539	0.0136877
ENSDARG00000019096	8.44262	2.67101	0.774059	0.00415561	0.0137083
ENSDARG00000015266	602.363	-1.13737	0.266839	0.00419905	0.0138363
ENSDARG00000042988	102.039	2.07304	0.530491	0.00420248	0.0138363
ENSDARG00000010266	141.649	1.80747	0.446919	0.00422054	0.0138825
ENSDARG00000036036	350.89	1.65347	0.402459	0.00422831	0.0138948
ENSDARG00000032155	151.284	-1.31551	0.311951	0.00424328	0.0139306
ENSDARG00000074642	42.3816	-1.81584	0.449646	0.00425767	0.0139645
ENSDARG00000017590	57.2486	-1.68001	0.41015	0.00426286	0.0139682
ENSDARG00000103736	12.6381	2.66425	0.77282	0.00428807	0.0140374
ENSDARG00000098935	127.672	1.36703	0.325522	0.00430583	0.0140821
ENSDARG00000100055	200.72	2.11165	0.545176	0.00439439	0.0143581
ENSDARG00000078650	47.1755	-1.69162	0.414337	0.00442293	0.0144376
ENSDARG00000061203	76.182	-1.2711	0.30132	0.00443702	0.0144698
ENSDARG00000037402	70.2573	2.6748	0.781309	0.00447071	0.0145658
ENSDARG00000060597	81.5974	-1.63436	0.398408	0.00447799	0.0145757
ENSDARG00000012820	526.188	1.61624	0.393666	0.0045444	0.0147779
ENSDARG00000018904	58.1531	1.43372	0.344053	0.00455112	0.0147857
ENSDARG00000090213	129.53	2.40294	0.656449	0.00455977	0.0147999
ENSDARG00000098350	32.2619	2.43255	0.668946	0.0045668	0.0148072
ENSDARG00000099458	213.71	-1.13677	0.267899	0.00457397	0.0148072
ENSDARG00000094833	12.4188	2.70166	0.797398	0.00457496	0.0148072
ENSDARG00000094561	22.7097	2.70403	0.799195	0.00460449	0.0148887
ENSDARG00000016687	168.685	-1.26901	0.301404	0.00460928	0.0148902
ENSDARG00000007786	86.5361	1.56323	0.37931	0.00461527	0.0148955
ENSDARG00000014915	29.2396	2.58969	0.740818	0.00462865	0.0149247
ENSDARG00000008380	128.004	1.75737	0.434668	0.00465462	0.0149943
ENSDARG00000029146	276.5	-0.981212	0.229805	0.00466405	0.0150106
ENSDARG00000029689	306.369	1.55374	0.377033	0.00468723	0.0150711
ENSDARG00000061121	651.428	1.50527	0.364128	0.00476029	0.0152917
ENSDARG00000103525	25.88	-2.21216	0.584083	0.00477281	0.0153176
ENSDARG00000067990	410.469	1.43041	0.344205	0.00480351	0.0153925
ENSDARG00000074242	2776.04	-1.10608	0.260946	0.00480512	0.0153925
ENSDARG00000001777	81.0246	-1.65835	0.407353	0.00491299	0.015706
ENSDARG00000101602	22.1169	-1.82886	0.457487	0.00491415	0.015706
ENSDARG00000098753	36.9535	1.97864	0.504539	0.0049167	0.015706
ENSDARG00000006758	97.2863	1.68228	0.41444	0.00496186	0.0158355
ENSDARG00000101233	45.2716	-1.57999	0.385561	0.00496992	0.0158465
ENSDARG00000023659	133.223	-1.50772	0.365707	0.00497603	0.0158513
ENSDARG00000015790	17.627	2.55514	0.72914	0.00499867	0.0159087
ENSDARG00000100844	28.1505	-1.8428	0.462447	0.00503962	0.0160156
ENSDARG00000044601	65.4322	1.60879	0.393932	0.0050416	0.0160156
ENSDARG00000078676	31.5884	-1.60099	0.391837	0.00506243	0.0160669
ENSDARG00000103811	182.756	-1.44324	0.348761	0.00509256	0.0161383
ENSDARG00000101009	10.7087	2.6606	0.783494	0.00509433	0.0161383
ENSDARG00000087443	10.3848	2.58944	0.747537	0.00513438	0.0162502
ENSDARG00000014348	7.95451	2.7294	0.822721	0.00515323	0.0162822
ENSDARG00000030583	72.4316	-1.92358	0.48832	0.00515398	0.0162822
ENSDARG00000039647	439.675	1.60267	0.392801	0.00517378	0.0163297
ENSDARG00000024365	43.7924	-1.79975	0.450658	0.00528091	0.0166526
ENSDARG00000074554	27.0832	2.25061	0.60281	0.00528809	0.0166599
ENSDARG00000099420	624.44	1.99891	0.513834	0.00532948	0.0167749
ENSDARG00000004621	576.98	1.9673	0.503539	0.00534357	0.0168039
ENSDARG00000100354	26.6561	2.16475	0.571453	0.00536185	0.0168459
ENSDARG00000101869	231.245	-1.28122	0.307455	0.00549065	0.0172348
ENSDARG00000071506	59.8197	-1.233	0.295065	0.0055075	0.0172719
ENSDARG00000021252	336.522	1.63117	0.402687	0.00559536	0.0175171
ENSDARG00000092624	64.0829	-1.27609	0.306448	0.00559663	0.0175171
ENSDARG00000044016	157.85	-1.19036	0.284423	0.005601	0.0175171
ENSDARG00000060641	44.3672	-1.88259	0.477919	0.00560748	0.0175215
ENSDARG00000004906	45.2403	1.9398	0.496199	0.00561427	0.0175267
ENSDARG00000033447	18.6462	2.82949	0.895994	0.0056328	0.0175686
ENSDARG00000102975	83.3599	2.3234	0.634843	0.00569914	0.0177594
ENSDARG00000068050	28.2075	-1.91682	0.489316	0.00570585	0.0177642
ENSDARG00000019897	18.07	-2.07835	0.54326	0.00572126	0.017796
ENSDARG00000045888	42.4355	2.08883	0.546984	0.0057323	0.0178081
ENSDARG00000041538	104.394	1.9568	0.502407	0.00573551	0.0178081
ENSDARG00000010160	2636.86	1.96009	0.503763	0.00578471	0.0179446
ENSDARG00000014792	35.8822	-1.7546	0.439638	0.00580206	0.0179713
ENSDARG00000075666	66.1434	1.92986	0.494043	0.00580376	0.0179713
ENSDARG00000068708	77.5416	2.10924	0.554837	0.00583412	0.018049
ENSDARG00000017844	52.3681	2.04845	0.533773	0.00585506	0.0180975
ENSDARG00000053130	68.3169	2.38311	0.661146	0.00587755	0.0181506
ENSDARG00000038967	107.482	1.36382	0.330397	0.00590144	0.018208
ENSDARG00000020621	49.5813	2.06693	0.540515	0.00591505	0.0182335
ENSDARG00000053559	7.95964	2.84942	0.916967	0.00592032	0.0182335
ENSDARG00000092722	62.334	-1.60131	0.395564	0.00593195	0.018253
ENSDARG00000104149	14.1754	2.73629	0.839655	0.00594917	0.0182896
ENSDARG00000028017	53.6163	2.51009	0.718799	0.00596061	0.0183083
ENSDARG00000030237	137.013	1.87798	0.478364	0.00597149	0.0183095
ENSDARG00000098749	84.4468	-1.5301	0.375741	0.00597402	0.0183095
ENSDARG00000014068	91.5938	1.95911	0.504531	0.00598068	0.0183095
ENSDARG00000022974	30.3243	2.33117	0.640406	0.00598647	0.0183095
ENSDARG00000013750	18.5886	2.57172	0.749121	0.00598765	0.0183095
ENSDARG00000079089	100.453	-1.41418	0.344268	0.00603186	0.0184283
ENSDARG00000063451	20.2926	-1.97961	0.511612	0.00603749	0.0184291
ENSDARG00000012499	305.947	-1.30508	0.315391	0.00606349	0.018492
ENSDARG00000033126	24.8946	2.2911	0.625663	0.00617389	0.018812
ENSDARG00000018397	27.6467	1.99142	0.516388	0.00618864	0.0188402
ENSDARG00000069920	283.334	1.90016	0.486561	0.00619732	0.0188499
ENSDARG00000009488	93.856	-1.33499	0.323791	0.00624183	0.0189685
ENSDARG00000007377	36.0918	-1.92227	0.494194	0.00629876	0.0191152
ENSDARG00000060469	43.2504	-1.94676	0.502204	0.00630365	0.0191152
ENSDARG00000102055	32.7503	2.68342	0.813221	0.0063068	0.0191152
ENSDARG00000002369	113.563	1.82762	0.464293	0.00632328	0.0191483
ENSDARG00000041787	30.313	-2.0035	0.521375	0.00635706	0.0192336
ENSDARG00000037415	90.3139	-1.68444	0.421286	0.00636968	0.0192548
ENSDARG00000019601	48.8188	2.05351	0.538769	0.00640424	0.0193423
ENSDARG00000045230	21.3647	2.6279	0.783514	0.00642029	0.0193737
ENSDARG00000075188	101.625	-1.7894	0.453144	0.00646511	0.0194918
ENSDARG00000059725	118.803	1.87069	0.478597	0.0064916	0.0195545
ENSDARG00000018393	31.7019	2.12702	0.565442	0.00650338	0.0195728
ENSDARG00000013921	63.3278	-1.26762	0.30685	0.00652107	0.0196089
ENSDARG00000069831	19.2217	2.75336	0.860119	0.00656744	0.019717
ENSDARG00000013685	43.4222	2.63739	0.790498	0.0065685	0.019717
ENSDARG00000098443	42.6772	2.32987	0.644728	0.00659873	0.0197904
ENSDARG00000001950	432.424	1.48433	0.365269	0.00661573	0.0198241
ENSDARG00000006467	44.1415	-1.92987	0.498463	0.00665897	0.0199363
ENSDARG00000078109	51.5511	1.97532	0.513544	0.00666744	0.0199442
ENSDARG00000035023	20.1859	2.64978	0.798722	0.00667602	0.0199475
ENSDARG00000008275	261.406	-1.25272	0.303372	0.00668016	0.0199475
ENSDARG00000054823	41.3478	2.30205	0.634005	0.00669711	0.0199808
ENSDARG00000089836	54.8852	1.91554	0.494117	0.0067259	0.0200463
ENSDARG00000078172	41.7355	-2.2119	0.598557	0.00673074	0.0200463
ENSDARG00000013847	60.5907	-1.88406	0.484187	0.00677607	0.0201638
ENSDARG00000091138	29.7714	-1.878	0.482348	0.00679802	0.0202049
ENSDARG00000094181	45.009	-1.75181	0.44311	0.00680165	0.0202049
ENSDARG00000099672	91.0712	-1.55288	0.385148	0.00684318	0.0203107
ENSDARG00000018149	66.1197	1.99541	0.521279	0.00685692	0.0203339
ENSDARG00000042094	67.1721	-1.44173	0.354365	0.00687491	0.0203697
ENSDARG00000039667	36.8452	2.15248	0.577115	0.00688771	0.02039
ENSDARG00000087301	117.332	2.15167	0.576978	0.00691501	0.0204532
ENSDARG00000069111	104.674	-1.45701	0.358744	0.00693802	0.0205002
ENSDARG00000104837	66.1145	1.66816	0.4187	0.00694285	0.0205002
ENSDARG00000057854	164.792	-1.21248	0.293568	0.0069535	0.020514
ENSDARG00000035330	192.458	-1.18691	0.287034	0.0069907	0.0205908
ENSDARG00000036299	290.747	-0.909028	0.216902	0.00699215	0.0205908
ENSDARG00000070427	21.6508	2.67222	0.815616	0.00699752	0.0205908
ENSDARG00000060766	46.0638	-1.60559	0.400968	0.00707683	0.0208053
ENSDARG00000070959	329.748	1.67004	0.419761	0.00708254	0.0208053
ENSDARG00000099002	73.1239	-1.53714	0.381588	0.00711387	0.0208795
ENSDARG00000037593	75.8294	-1.51295	0.374853	0.00713228	0.0209157
ENSDARG00000053404	449.874	1.36543	0.33452	0.0071754	0.0210242
ENSDARG00000038910	35.5201	2.24548	0.614822	0.00721746	0.0211294
ENSDARG00000007989	19.3975	2.61585	0.787261	0.00732794	0.0214223
ENSDARG00000095921	104.281	1.95731	0.510747	0.00732999	0.0214223
ENSDARG00000003373	19.3977	2.30599	0.640222	0.00734636	0.0214486
ENSDARG00000068820	13.6103	2.80305	0.908242	0.00735149	0.0214486
ENSDARG00000013804	34.8141	2.35119	0.659393	0.00735925	0.021453
ENSDARG00000089204	26.3921	2.7763	0.88919	0.00741728	0.0216021
ENSDARG00000014015	25.0023	2.55412	0.755217	0.00742296	0.0216021
ENSDARG00000027828	338.145	-0.820866	0.195892	0.00745228	0.021665
ENSDARG00000042864	18.56	2.44256	0.700926	0.0074572	0.021665
ENSDARG00000057912	126.717	1.69107	0.427369	0.00746721	0.0216758
ENSDARG00000087636	210.143	1.62567	0.408245	0.00751171	0.0217865
ENSDARG00000098801	113.351	-1.38651	0.341228	0.00755637	0.0218975
ENSDARG00000004870	63.6827	2.13833	0.575986	0.007607	0.0220257
ENSDARG00000102585	26.9308	-1.79744	0.46042	0.00763559	0.022074
ENSDARG00000077654	73.2562	-1.44826	0.358358	0.00764088	0.022074
ENSDARG00000104938	288.616	-1.11651	0.270311	0.00764631	0.022074
ENSDARG00000023190	102.302	1.18286	0.287437	0.00764942	0.022074
ENSDARG00000017294	580.67	-1.30618	0.320044	0.00772538	0.0222745
ENSDARG00000000069	80.2281	2.75839	0.881107	0.00773692	0.0222891
ENSDARG00000018328	14.8777	2.57996	0.771978	0.00774508	0.0222939
ENSDARG00000014428	218.58	1.44723	0.358413	0.0077652	0.0223331
ENSDARG00000054433	56.5926	1.89422	0.49189	0.00778448	0.0223698
ENSDARG00000103543	464.465	2.37962	0.675085	0.00781315	0.0224334
ENSDARG00000076719	11.5722	2.70267	0.844607	0.00782214	0.0224405
ENSDARG00000100031	21.4722	2.28203	0.633839	0.00788187	0.0225929
ENSDARG00000043257	257.615	1.80279	0.463078	0.00789444	0.0226101
ENSDARG00000105243	31.5411	2.11324	0.568695	0.00798544	0.0228517
ENSDARG00000015502	38.1946	-2.00537	0.530347	0.00803008	0.0229603
ENSDARG00000005560	97.8018	1.86586	0.483746	0.00804747	0.0229908
ENSDARG00000019208	49.4162	-1.41037	0.349028	0.00805555	0.0229948
ENSDARG00000098824	34.4987	-1.87114	0.485527	0.00806592	0.0230053
ENSDARG00000062972	303.02	-1.21272	0.296155	0.0080907	0.0230568
ENSDARG00000071573	28.375	2.29088	0.639074	0.00813176	0.0231546
ENSDARG00000004875	20.6121	-1.76365	0.45183	0.00815235	0.023194
ENSDARG00000053326	43.1439	1.99814	0.528496	0.00817479	0.0232298
ENSDARG00000059097	101.751	1.67862	0.42606	0.00817846	0.0232298
ENSDARG00000020866	13.4517	-2.11713	0.571337	0.00822149	0.0233327
ENSDARG00000006062	79.9697	-1.68175	0.427206	0.00824253	0.0233551
ENSDARG00000100310	20.5709	-2.43499	0.703514	0.00824297	0.0233551
ENSDARG00000102589	309.71	-0.840051	0.201794	0.00830039	0.0234723
ENSDARG00000059722	132.403	-1.30557	0.321217	0.00830464	0.0234723
ENSDARG00000059906	403.138	1.77547	0.456035	0.00830486	0.0234723
ENSDARG00000029057	13.5227	2.51527	0.743634	0.00835215	0.0235866
ENSDARG00000086034	33.7856	-1.72572	0.440984	0.00838843	0.0236696
ENSDARG00000036584	60.4706	2.12963	0.577145	0.00844843	0.0238193
ENSDARG00000071251	74.6729	1.77598	0.456831	0.00848688	0.0239081
ENSDARG00000091116	45.8625	-1.5622	0.39292	0.00851795	0.0239759
ENSDARG00000104497	69.4124	-1.36473	0.337781	0.00856267	0.0240656
ENSDARG00000040158	107.748	1.74587	0.447751	0.00856382	0.0240656
ENSDARG00000070271	135.33	-1.2918	0.318144	0.00858469	0.0241045
ENSDARG00000023151	239.735	1.83024	0.474518	0.00864035	0.024241
ENSDARG00000016393	37.9054	1.80207	0.465827	0.00871767	0.0244379
ENSDARG00000090564	55.6363	-1.3674	0.338944	0.00875182	0.0245137
ENSDARG00000068220	24.4516	-1.88675	0.493363	0.00877571	0.0245371
ENSDARG00000029995	50.2741	2.57405	0.778479	0.00878042	0.0245371
ENSDARG00000042277	68.2667	1.7899	0.462205	0.00878162	0.0245371
ENSDARG00000010434	122.783	1.83094	0.475292	0.0087935	0.0245503
ENSDARG00000040884	64.457	1.73816	0.446409	0.00888044	0.0247729
ENSDARG00000079348	23.0537	-1.97621	0.523997	0.00889834	0.0248027
ENSDARG00000100553	235.889	1.02483	0.249146	0.00894291	0.0249067
ENSDARG00000044212	106.684	1.63802	0.41653	0.00902056	0.0251026
ENSDARG00000036371	21.329	2.70083	0.858091	0.0090392	0.0251341
ENSDARG00000100821	70.7198	1.6958	0.433964	0.00904665	0.0251345
ENSDARG00000004270	45.232	1.99955	0.532908	0.00909205	0.0252402
ENSDARG00000063149	17.657	2.25884	0.631689	0.00914427	0.0253646
ENSDARG00000059897	61.5774	-1.37711	0.342535	0.00916746	0.0254084
ENSDARG00000054155	41.6474	2.04213	0.548441	0.00919121	0.0254537
ENSDARG00000087732	843.973	-1.5386	0.388025	0.00922464	0.025506
ENSDARG00000008678	32.9463	2.18703	0.603103	0.00922494	0.025506
ENSDARG00000060504	50.1893	-1.49438	0.37542	0.00923717	0.0255193
ENSDARG00000023330	536.072	-1.20615	0.296703	0.00924986	0.0255338
ENSDARG00000041735	57.1025	2.16502	0.594847	0.00929777	0.0256454
ENSDARG00000073813	19.0379	-2.06688	0.557909	0.00930653	0.025649
ENSDARG00000059367	8.6425	2.8293	0.968811	0.0094191	0.0259384
ENSDARG00000032221	63.2907	-1.48205	0.372403	0.00943454	0.0259601
ENSDARG00000093774	35.671	2.64439	0.826105	0.00946902	0.0260341
ENSDARG00000044420	24.1333	2.35303	0.674538	0.00953444	0.026193
ENSDARG00000055607	50.4491	-1.70349	0.438055	0.00963385	0.0264251
ENSDARG00000105296	198.829	1.6494	0.421657	0.00963433	0.0264251
ENSDARG00000082753	7199.4	1.29105	0.320184	0.00968253	0.0265361
ENSDARG00000099380	1782.04	1.30961	0.325369	0.00976678	0.0267457
ENSDARG00000103824	54.6465	2.34868	0.674095	0.00978797	0.0267824
ENSDARG00000079834	30.031	-1.99339	0.53357	0.00980266	0.026784
ENSDARG00000043697	105.004	1.52803	0.386432	0.00980573	0.026784
ENSDARG00000060257	69.7117	-1.50919	0.381034	0.00981197	0.026784
ENSDARG00000028336	46.1964	2.53835	0.768575	0.00993449	0.0270969
ENSDARG00000015427	135.835	1.86577	0.490591	0.00994809	0.0271125
ENSDARG00000100952	107.611	2.38902	0.693811	0.00999246	0.0272118
ENSDARG00000010946	233.215	-1.37702	0.3444	0.0100547	0.0273596
ENSDARG00000095896	82.2009	1.57327	0.400316	0.0101077	0.027482
ENSDARG00000009771	165.743	1.69559	0.437066	0.0101388	0.0275448
ENSDARG00000012244	49.126	2.18152	0.605772	0.0102364	0.0277879
ENSDARG00000035652	141.765	1.74847	0.453808	0.0102569	0.0278215
ENSDARG00000068286	19.8375	-2.23577	0.627992	0.0102739	0.0278458
ENSDARG00000101485	244.396	-1.22522	0.303688	0.0103237	0.0279587
ENSDARG00000019707	100.222	-1.39352	0.349577	0.0103503	0.0279994
ENSDARG00000015325	142.583	1.76636	0.459733	0.0103551	0.0279994
ENSDARG00000105037	113.86	1.9109	0.507121	0.0103745	0.0280065
ENSDARG00000014058	42.9239	-1.79283	0.468241	0.0103815	0.0280065
ENSDARG00000028857	59.1955	-1.48299	0.37485	0.0103821	0.0280065
ENSDARG00000059400	12.9931	2.4974	0.750491	0.0104522	0.0281735
ENSDARG00000101844	792.016	-0.985125	0.241301	0.0105552	0.0284287
ENSDARG00000013000	75.9436	-1.38108	0.346567	0.0105725	0.0284529
ENSDARG00000041433	196.215	1.83711	0.483345	0.0106312	0.0285885
ENSDARG00000105285	41.437	2.05935	0.560838	0.0106999	0.0287509
ENSDARG00000003151	304.319	1.92204	0.512127	0.010736	0.0288253
ENSDARG00000020107	121.929	1.87633	0.496861	0.0107999	0.0289741
ENSDARG00000032327	375.443	1.45973	0.369175	0.0108247	0.029018
ENSDARG00000036186	63.7966	2.09652	0.575927	0.0109939	0.0294485
ENSDARG00000007720	103.607	2.12364	0.586429	0.0110192	0.0294934
ENSDARG00000016253	46.127	2.45845	0.734329	0.011054	0.0295633
ENSDARG00000036092	17.0168	2.22872	0.629002	0.0111057	0.0296785
ENSDARG00000032619	181.792	1.93379	0.517521	0.0111457	0.0297622
ENSDARG00000025332	99.3117	1.58626	0.406887	0.0112594	0.0300425
ENSDARG00000103712	8.62372	2.53745	0.778523	0.0113287	0.0302041
ENSDARG00000083519	265.283	1.96932	0.530798	0.0114031	0.0303788
ENSDARG00000032970	134.541	1.69523	0.44038	0.0114376	0.0304318
ENSDARG00000062272	96.2116	-1.5302	0.390779	0.0114407	0.0304318
ENSDARG00000069624	17.9886	2.61918	0.828408	0.0114528	0.0304402
ENSDARG00000071403	636.444	1.95448	0.525928	0.0115123	0.0305749
ENSDARG00000070480	10.8293	2.74606	0.922711	0.0115584	0.0306734
ENSDARG00000044632	30.4388	-1.42993	0.36223	0.0115797	0.0307064
ENSDARG00000016447	181.312	-1.18243	0.294316	0.0116016	0.0307405
ENSDARG00000095904	103.207	-1.42888	0.362082	0.0116577	0.0308424
ENSDARG00000015385	19.735	2.65131	0.851395	0.011658	0.0308424
ENSDARG00000061207	38.4407	2.09065	0.576408	0.0117015	0.0309337
ENSDARG00000043485	35.9451	1.74469	0.456669	0.0117402	0.0310121
ENSDARG00000016981	16.0716	-1.88836	0.503871	0.0117629	0.0310483
ENSDARG00000060900	51.0763	-1.69802	0.442289	0.0118567	0.0312717
ENSDARG00000044062	268.866	-1.29646	0.325596	0.0118857	0.0313244
ENSDARG00000002644	27.1845	2.46771	0.744513	0.0119142	0.0313754
ENSDARG00000029474	37.6414	1.77534	0.46721	0.0120248	0.0316423
ENSDARG00000078250	127.028	1.69628	0.442333	0.0120985	0.0318119
ENSDARG00000070498	49.7613	1.81647	0.480857	0.0121195	0.0318427
ENSDARG00000045443	12.2793	2.44173	0.733053	0.0122537	0.0321706
ENSDARG00000035899	8.11425	2.6599	0.863514	0.0123288	0.0323431
ENSDARG00000103137	26.7797	-1.95395	0.528436	0.012364	0.0324108
ENSDARG00000008377	57.7155	1.85501	0.494467	0.0124111	0.0325092
ENSDARG00000077297	170.159	-1.14346	0.285228	0.0125142	0.0327543
ENSDARG00000104024	24.5793	2.07569	0.57373	0.0125425	0.0327959
ENSDARG00000025299	704.846	1.84152	0.490324	0.0125491	0.0327959
ENSDARG00000038672	123.212	-1.36453	0.34559	0.012568	0.0328201
ENSDARG00000098105	46.5696	-1.70674	0.44682	0.0126088	0.0328839
ENSDARG00000054152	107.09	-1.80791	0.479347	0.0126116	0.0328839
ENSDARG00000093494	12.3597	2.35976	0.694552	0.012624	0.0328862
ENSDARG00000070991	10.3082	-2.41189	0.720034	0.0126316	0.0328862
ENSDARG00000045877	74.4772	2.14548	0.601599	0.012705	0.0330523
ENSDARG00000045447	56.5536	2.06038	0.568951	0.0128465	0.033395
ENSDARG00000045150	184.384	-1.34918	0.34178	0.0128599	0.0334045
ENSDARG00000074034	39.2343	-1.93844	0.524609	0.0129143	0.0335205
ENSDARG00000090352	37.2441	2.14698	0.603171	0.0129654	0.0336086
ENSDARG00000018757	11.1602	2.65653	0.866913	0.012975	0.0336086
ENSDARG00000021891	16.1116	2.53284	0.787227	0.0129776	0.0336086
ENSDARG00000086222	79.1462	1.53325	0.395242	0.0132063	0.0341753
ENSDARG00000004796	25.226	1.98807	0.543598	0.0133204	0.0344446
ENSDARG00000099439	47.5069	1.95486	0.531662	0.0133344	0.0344494
ENSDARG00000080987	48.9945	-1.98426	0.542279	0.0133424	0.0344494
ENSDARG00000004889	141.996	-1.76588	0.467567	0.0133949	0.0345471
ENSDARG00000042296	16.8988	2.39399	0.715115	0.0134003	0.0345471
ENSDARG00000104868	27.2961	-1.89833	0.512029	0.0134258	0.0345818
ENSDARG00000091656	11.1467	2.54103	0.795051	0.0134339	0.0345818
ENSDARG00000032859	20.0913	-1.99887	0.547964	0.0134579	0.0346175
ENSDARG00000075883	8.49853	2.7943	1.00374	0.013499	0.0346973
ENSDARG00000101680	72.9611	1.57744	0.409011	0.0135113	0.0347028
ENSDARG00000020850	1429.26	1.38554	0.35312	0.0135448	0.034763
ENSDARG00000070780	10.256	2.64869	0.866426	0.0135713	0.0348049
ENSDARG00000068194	123.802	-1.3759	0.350468	0.013592	0.0348321
ENSDARG00000055792	107.939	1.72561	0.455318	0.013706	0.0350833
ENSDARG00000060929	35.783	-1.74187	0.46056	0.0137183	0.0350833
ENSDARG00000045367	38.1187	2.63199	0.855733	0.0137207	0.0350833
ENSDARG00000063054	115.606	-1.64087	0.428783	0.0137349	0.0350936
ENSDARG00000018809	31.1693	2.42525	0.733749	0.0139347	0.0355774
ENSDARG00000033928	43.837	2.20355	0.630362	0.0139923	0.0356979
ENSDARG00000040674	9.57748	2.54033	0.798494	0.0140299	0.0357675
ENSDARG00000025254	63.4954	1.9205	0.521818	0.0141808	0.0361252
ENSDARG00000042708	93.8357	1.71845	0.454112	0.0141968	0.0361257
ENSDARG00000100007	61.8362	-1.593	0.415052	0.014202	0.0361257
ENSDARG00000027353	83.0802	-1.48966	0.384249	0.0142217	0.0361491
ENSDARG00000060124	6.45014	-2.47455	0.762254	0.0143206	0.0363734
ENSDARG00000031649	9.12774	2.61106	0.846686	0.014429	0.0366217
ENSDARG00000004836	147.85	1.80829	0.484029	0.0144606	0.0366749
ENSDARG00000014907	7.96835	2.55803	0.812704	0.0145453	0.0368625
ENSDARG00000062025	13.3066	-2.23703	0.647025	0.0145793	0.0369154
ENSDARG00000101199	171.79	1.7969	0.480533	0.0145877	0.0369154
ENSDARG00000045768	108.097	1.41254	0.362518	0.014613	0.0369522
ENSDARG00000025718	259.018	-1.2855	0.326751	0.0146686	0.0370383
ENSDARG00000040861	271.693	-1.15862	0.292037	0.0146687	0.0370383
ENSDARG00000028228	556.874	-1.15423	0.2909	0.014708	0.0371104
ENSDARG00000073845	68.3735	2.19163	0.628166	0.0147762	0.0372551
ENSDARG00000053058	90.8147	2.1909	0.628519	0.0149637	0.0376753
ENSDARG00000009018	147.268	2.04247	0.568779	0.0149648	0.0376753
ENSDARG00000014828	15.4541	2.41702	0.734871	0.0150115	0.0377653
ENSDARG00000026109	9.10839	2.59293	0.838951	0.0150703	0.0378854
ENSDARG00000080775	130.41	-1.42359	0.366594	0.0151921	0.0381636
ENSDARG00000034693	40.7491	1.49188	0.386619	0.0152456	0.0382579
ENSDARG00000003693	65.3986	1.83754	0.495724	0.0152519	0.0382579
ENSDARG00000056167	94.5741	2.30533	0.680866	0.0153074	0.0383683
ENSDARG00000077473	62.3419	-1.51166	0.39262	0.0153313	0.0383683
ENSDARG00000087452	88.0719	1.61633	0.424325	0.0153384	0.0383683
ENSDARG00000039500	31.2865	-1.662	0.438555	0.0153406	0.0383683
ENSDARG00000020946	68.6746	1.45715	0.37665	0.015388	0.0384587
ENSDARG00000036162	676.659	-1.50903	0.392252	0.0155831	0.0389181
ENSDARG00000062385	114.08	-1.21208	0.307709	0.0156057	0.0389461
ENSDARG00000067741	24.2247	2.39074	0.72421	0.0156412	0.0390064
ENSDARG00000076509	176.91	-1.23954	0.315325	0.0156593	0.0390233
ENSDARG00000029764	113.395	1.58962	0.41672	0.0156741	0.0390319
ENSDARG00000059409	14.4312	-2.08076	0.58633	0.0158726	0.0394976
ENSDARG00000087341	39.8863	-1.40436	0.362205	0.0159723	0.0397108
ENSDARG00000089742	48.1762	-1.4731	0.382251	0.0159815	0.0397108
ENSDARG00000060030	282.763	-1.30189	0.33313	0.0160203	0.0397787
ENSDARG00000006420	229.299	1.69899	0.451772	0.0161081	0.0399677
ENSDARG00000015930	37.2183	1.74375	0.466373	0.0161575	0.0400613
ENSDARG00000001994	643.879	1.76549	0.473563	0.016177	0.0400806
ENSDARG00000028379	60.0785	-1.49569	0.389404	0.0162864	0.040322
ENSDARG00000058471	56.967	-1.65761	0.43897	0.0163014	0.040322
ENSDARG00000026941	16.9678	2.3488	0.70594	0.0163096	0.040322
ENSDARG00000035909	129.503	-1.6983	0.452113	0.0164035	0.0404975
ENSDARG00000001785	57.0122	-1.26356	0.322902	0.0164042	0.0404975
ENSDARG00000037872	46.853	1.65047	0.43695	0.0164289	0.0405294
ENSDARG00000019081	13.9004	2.55447	0.822611	0.0164782	0.0406219
ENSDARG00000043237	44.8495	-1.76168	0.473533	0.0167882	0.0413563
ENSDARG00000099954	128.889	-1.41058	0.365241	0.0168456	0.041468
ENSDARG00000018936	37.109	1.77129	0.476984	0.0169192	0.0416194
ENSDARG00000063062	31.2436	2.19707	0.63802	0.0169962	0.0417787
ENSDARG00000059386	54.3881	-1.66044	0.441242	0.0170688	0.0419272
ENSDARG00000042518	102.87	-1.32424	0.340989	0.0172394	0.0423159
ENSDARG00000056753	93.946	-0.997412	0.251619	0.0172568	0.0423284
ENSDARG00000105083	58.0168	1.91008	0.525881	0.0173529	0.0425337
ENSDARG00000022648	10.0475	2.45616	0.767735	0.0173942	0.0426047
ENSDARG00000011219	70.2285	-1.70232	0.455319	0.0174366	0.042678
ENSDARG00000099517	18.1006	2.33636	0.704395	0.0174669	0.0427216
ENSDARG00000052012	18.5822	2.33735	0.704992	0.0174939	0.0427574
ENSDARG00000079815	13.3447	2.43435	0.756038	0.0175194	0.0427891
ENSDARG00000038290	26.9015	1.97187	0.549438	0.0177493	0.0433084
ENSDARG00000068760	71.8175	1.48882	0.389563	0.0177609	0.0433084
ENSDARG00000040822	15.3899	2.36075	0.717884	0.0177698	0.0433084
ENSDARG00000054186	16.6601	2.31116	0.693617	0.0178975	0.0435886
ENSDARG00000042030	14.5502	2.13217	0.613208	0.0179429	0.0436592
ENSDARG00000102937	41.5827	-1.73695	0.467571	0.0179519	0.0436592
ENSDARG00000099453	21.4959	2.40545	0.742194	0.0179686	0.0436689
ENSDARG00000097848	25.2465	2.1414	0.617268	0.0180093	0.0437368
ENSDARG00000104933	100.734	-1.22947	0.315297	0.0180292	0.0437544
ENSDARG00000005513	906.096	1.7268	0.464405	0.0180469	0.0437662
ENSDARG00000087226	152.679	-1.37238	0.356016	0.0182331	0.0441867
ENSDARG00000086224	75.9129	-1.40515	0.365608	0.0182983	0.0443135
ENSDARG00000045487	209.204	1.97546	0.55245	0.0184579	0.0446683
ENSDARG00000069038	86.382	-0.987256	0.249964	0.0184783	0.0446862
ENSDARG00000013044	12.8805	2.69818	0.954856	0.0185385	0.0448002
ENSDARG00000056639	95.6804	-1.19044	0.305035	0.0185531	0.0448008
ENSDARG00000098103	41.422	-1.55005	0.409253	0.0185648	0.0448008
ENSDARG00000015422	14.8372	2.61706	0.881375	0.0186456	0.0449643
ENSDARG00000021669	291.61	-1.07984	0.275052	0.0187989	0.0453021
ENSDARG00000029170	43.072	2.09877	0.602286	0.0190095	0.0457506
ENSDARG00000074143	142.449	-1.09727	0.279969	0.0190117	0.0457506
ENSDARG00000063155	62.3921	-1.19162	0.305914	0.0190962	0.0459217
ENSDARG00000035074	27.5921	-1.64653	0.440387	0.0192074	0.046157
ENSDARG00000015862	179.549	1.96805	0.551535	0.0192854	0.0462883
ENSDARG00000079905	64.3704	-1.3955	0.364045	0.0192922	0.0462883
ENSDARG00000095553	16.9154	2.63576	0.901524	0.0193025	0.0462883
ENSDARG00000099455	16.842	2.39643	0.743143	0.0193792	0.0464397
ENSDARG00000075252	111.798	1.41908	0.371094	0.0194044	0.0464677
ENSDARG00000060041	62.8194	2.06247	0.588658	0.0194515	0.0465481
ENSDARG00000069817	576.476	2.37472	0.732216	0.0195721	0.0468041
ENSDARG00000069360	28.4586	2.18107	0.638915	0.019599	0.0468358
ENSDARG00000068434	189.608	1.98929	0.560346	0.019617	0.0468462
ENSDARG00000016345	197.889	-0.973316	0.247277	0.0197649	0.0471665
ENSDARG00000052537	67.1745	-1.58507	0.421866	0.0197833	0.0471777
ENSDARG00000035870	66.6377	1.52441	0.403285	0.0198867	0.0473913
ENSDARG00000014554	12.9296	2.2894	0.690608	0.0200887	0.0478228
ENSDARG00000104701	350.209	-1.07735	0.275514	0.0200956	0.0478228
ENSDARG00000061517	76.9535	-1.39927	0.366294	0.0202447	0.0481443
ENSDARG00000004597	76.725	1.7727	0.483913	0.0204165	0.0485192
ENSDARG00000105288	55.7585	1.5987	0.427087	0.0204397	0.0485408
ENSDARG00000069185	243.426	-1.52983	0.406118	0.0207602	0.049248
ENSDARG00000073841	523.784	-1.00143	0.255559	0.0207662	0.049248
ENSDARG00000010008	106.621	1.85462	0.513257	0.0208946	0.0494921
ENSDARG00000014165	63.8659	2.05777	0.590228	0.020898	0.0494921
ENSDARG00000043864	63.052	2.01876	0.575338	0.0212077	0.0501912
ENSDARG00000004861	59.5302	1.77558	0.486622	0.0214396	0.0507048
ENSDARG00000099049	33.9331	-1.83751	0.508244	0.0214807	0.0507671
ENSDARG00000104793	20.4144	-1.86369	0.517788	0.0215981	0.0510095
ENSDARG00000027749	156.034	1.46362	0.387086	0.0216362	0.0510645
ENSDARG00000042845	7.30585	2.59727	0.885336	0.0216617	0.0510894
ENSDARG00000083986	1199.77	-1.54825	0.413264	0.0218732	0.0515529
ENSDARG00000078686	326.437	-0.928897	0.237008	0.0219501	0.0516987
ENSDARG00000061021	28.0208	-1.92086	0.539409	0.0219827	0.0517401
ENSDARG00000105179	62.9843	-1.51072	0.401866	0.0220201	0.0517925
ENSDARG00000077068	37.2687	-2.15372	0.633663	0.0221256	0.052005
ENSDARG00000021086	32.7149	-1.85862	0.517088	0.0222245	0.0522017
ENSDARG00000070426	275.386	1.44366	0.381795	0.0222423	0.0522079
ENSDARG00000082850	133.738	1.78892	0.492605	0.0222845	0.052271
ENSDARG00000021143	87.8138	1.74948	0.479137	0.0223169	0.0522961
ENSDARG00000063921	215.898	1.54383	0.412468	0.0223256	0.0522961
ENSDARG00000076462	46.9045	1.89222	0.529514	0.0223516	0.0523214
ENSDARG00000044521	527.664	1.37236	0.360855	0.0224388	0.0524897
ENSDARG00000099865	165.521	1.37317	0.361154	0.0224977	0.0525916
ENSDARG00000077215	68.7105	-1.3836	0.364248	0.0225213	0.0526059
ENSDARG00000019986	16.785	2.45976	0.792752	0.0225345	0.0526059
ENSDARG00000018060	273.427	1.63323	0.441338	0.0227622	0.0531016
ENSDARG00000088745	7.40167	2.62613	0.919043	0.0229183	0.0534293
ENSDARG00000068460	28.45	-1.73601	0.475908	0.0231921	0.0540309
ENSDARG00000022232	277.68	-1.15065	0.298301	0.0232523	0.0541345
ENSDARG00000093480	31.71	-1.43932	0.381811	0.0234186	0.0544848
ENSDARG00000069846	23.0705	2.43594	0.782498	0.0236256	0.0549105
ENSDARG00000093448	31.995	2.17213	0.645678	0.0236496	0.0549105
ENSDARG00000012016	53.3866	-1.52573	0.408482	0.0236577	0.0549105
ENSDARG00000017219	1580.2	1.47027	0.391449	0.0236656	0.0549105
ENSDARG00000059357	49.7257	1.62117	0.438701	0.023699	0.054951
ENSDARG00000070669	25.7645	-1.69905	0.464316	0.0237643	0.0550652
ENSDARG00000059298	51.9451	2.26711	0.691446	0.0239734	0.0555122
ENSDARG00000035890	26.8133	2.33263	0.725908	0.02424	0.0560918
ENSDARG00000042319	67.301	-1.24547	0.325987	0.0243792	0.0563759
ENSDARG00000093786	7.41427	-2.30912	0.714477	0.0245577	0.0567505
ENSDARG00000103350	52.2039	-1.40026	0.371555	0.0247986	0.0572685
ENSDARG00000039729	34.8613	1.84493	0.516534	0.0248366	0.0573014
ENSDARG00000075542	578.048	1.04489	0.270297	0.0248462	0.0573014
ENSDARG00000079148	91.5463	-1.40232	0.372336	0.0249634	0.0575331
ENSDARG00000052950	158.913	-1.07374	0.278329	0.0249959	0.0575693
ENSDARG00000076796	281.992	-0.872263	0.223792	0.0250235	0.0575834
ENSDARG00000068432	185.657	1.92764	0.547521	0.0250355	0.0575834
ENSDARG00000052150	123.554	1.64077	0.447041	0.025236	0.0580057
ENSDARG00000068940	115.243	1.9548	0.558401	0.0252934	0.0580988
ENSDARG00000075295	102.428	1.7945	0.499429	0.0254181	0.0583461
ENSDARG00000023724	209.086	-1.34775	0.356673	0.0255118	0.0585221
ENSDARG00000054007	124.973	-1.35177	0.3579	0.0255591	0.0585914
ENSDARG00000061547	122.275	1.90986	0.541723	0.0255814	0.0586034
ENSDARG00000041839	252.043	-1.29952	0.3427	0.025671	0.0587088
ENSDARG00000026629	67.4453	-1.1463	0.298984	0.025671	0.0587088
ENSDARG00000103038	83.8357	-1.57393	0.426013	0.0256787	0.0587088
ENSDARG00000102447	101.041	-1.1892	0.311246	0.0259035	0.0591511
ENSDARG00000103163	12.1872	2.5247	0.851525	0.0259066	0.0591511
ENSDARG00000019239	45.0465	1.64695	0.450206	0.0261418	0.0596485
ENSDARG00000097057	25.7366	2.40681	0.774549	0.0262839	0.0599328
ENSDARG00000070726	43.7547	2.14941	0.641787	0.0263716	0.0600894
ENSDARG00000090634	73.554	1.84332	0.518366	0.0263876	0.0600894
ENSDARG00000068995	224.89	1.30202	0.344139	0.026486	0.0602737
ENSDARG00000024314	8.05909	2.56281	0.88528	0.0266378	0.0605789
ENSDARG00000019856	2370.36	1.5805	0.429298	0.0267063	0.0606945
ENSDARG00000068123	132.43	1.30201	0.344457	0.0268599	0.0610032
ENSDARG00000004297	62.7439	1.44246	0.386428	0.0269505	0.0611685
ENSDARG00000045355	10.5198	2.57309	0.89665	0.0271034	0.0614749
ENSDARG00000005540	58.8846	1.65757	0.455112	0.0272795	0.0618335
ENSDARG00000003041	9.35827	-2.19569	0.665881	0.027543	0.0623896
ENSDARG00000017036	36.4857	-1.56623	0.425858	0.0277196	0.0627482
ENSDARG00000089190	35.5556	-1.77417	0.495611	0.0277782	0.0628395
ENSDARG00000021805	138.272	-1.3485	0.358992	0.0278385	0.0629344
ENSDARG00000053624	15.5665	-1.67203	0.460701	0.0279103	0.0630454
ENSDARG00000056019	118.813	-1.20579	0.317511	0.0279243	0.0630454
ENSDARG00000100244	182.514	1.64004	0.450122	0.0279637	0.0630725
ENSDARG00000024877	24.2868	2.19828	0.668104	0.027973	0.0630725
ENSDARG00000101794	83.3818	1.66214	0.457605	0.0280851	0.0632836
ENSDARG00000076170	68.3324	1.52344	0.412708	0.028129	0.063341
ENSDARG00000018334	622.692	1.45343	0.391138	0.0283447	0.0637849
ENSDARG00000056829	13.4285	2.36881	0.758803	0.0283821	0.0638273
ENSDARG00000044669	304.946	1.81881	0.512535	0.02849	0.0640278
ENSDARG00000004525	39.9348	2.06021	0.607125	0.0285606	0.0641447
ENSDARG00000045568	16.3966	2.19543	0.668322	0.0286711	0.0643506
ENSDARG00000090228	17.2844	2.55726	0.891666	0.0287836	0.0645555
ENSDARG00000101624	120.627	-1.18109	0.311102	0.0288	0.0645555
ENSDARG00000044975	68.429	2.2211	0.681151	0.0288328	0.0645871
ENSDARG00000008491	89.5571	-1.41384	0.379854	0.0292342	0.0654141
ENSDARG00000057556	4773.92	2.11162	0.630812	0.0292401	0.0654141
ENSDARG00000034424	17.4634	2.26128	0.702487	0.0293036	0.0655134
ENSDARG00000097006	83.2195	1.94371	0.560983	0.0294168	0.0657236
ENSDARG00000059596	230.48	-1.24194	0.329085	0.0294949	0.0658554
ENSDARG00000037008	49.0317	-1.67864	0.464869	0.0295441	0.0659223
ENSDARG00000004049	49.1746	-2.07666	0.616089	0.0295809	0.0659615
ENSDARG00000002184	57.3089	-1.66648	0.461065	0.0298028	0.0664133
ENSDARG00000060199	18.0094	2.362	0.759166	0.0298427	0.066459
ENSDARG00000068457	358.751	1.76181	0.494062	0.0299262	0.0666018
ENSDARG00000003564	11.1082	2.53144	0.876002	0.0300785	0.0668975
ENSDARG00000009136	120.135	-1.17968	0.311649	0.0301608	0.0670371
ENSDARG00000101350	10.9561	-2.28279	0.71592	0.0301838	0.0670448
ENSDARG00000105641	85.1036	-1.45096	0.392397	0.0305221	0.0677523
ENSDARG00000099214	54.7027	2.3545	0.756876	0.0305751	0.0678262
ENSDARG00000070657	183.193	-1.05757	0.277501	0.0306483	0.0679447
ENSDARG00000017466	222.417	-0.963418	0.251537	0.0307619	0.0681525
ENSDARG00000057698	114.857	1.7103	0.477266	0.0309	0.0684143
ENSDARG00000042151	52.9865	1.553	0.424992	0.0309767	0.06854
ENSDARG00000020976	12.3833	2.47499	0.8365	0.0310776	0.0686642
ENSDARG00000055377	17.0916	1.99979	0.586195	0.0310776	0.0686642
ENSDARG00000025904	32.2168	2.08191	0.621146	0.0310928	0.0686642
ENSDARG00000103787	260.52	-0.992402	0.259715	0.0311506	0.0687475
ENSDARG00000018049	160.375	1.4467	0.391681	0.0311989	0.0688099
ENSDARG00000045773	47.9292	-1.46211	0.396517	0.0312632	0.0689075
ENSDARG00000017617	7.45213	2.57069	0.918356	0.0314793	0.0693392
ENSDARG00000098320	48.5209	-2.08935	0.625222	0.0315318	0.0694103
ENSDARG00000005612	31.0218	1.90105	0.547599	0.031575	0.069461
ENSDARG00000100152	22.4882	-1.99953	0.587022	0.0316604	0.0696041
ENSDARG00000062430	100.072	-1.21925	0.324079	0.031684	0.0696115
ENSDARG00000093768	78.0333	2.09671	0.62902	0.031821	0.0698261
ENSDARG00000079046	84.1259	1.53025	0.418513	0.0318223	0.0698261
ENSDARG00000056374	31.6565	-1.60452	0.442801	0.0320075	0.0701804
ENSDARG00000099368	215.493	1.7871	0.505708	0.0320247	0.0701804
ENSDARG00000068088	29.7399	2.43716	0.81364	0.0321348	0.0703767
ENSDARG00000002912	69.6243	-1.46009	0.396704	0.0321881	0.0704206
ENSDARG00000057245	59.1511	-1.20546	0.320434	0.0321958	0.0704206
ENSDARG00000075456	26.3284	1.81447	0.516106	0.0323765	0.0707707
ENSDARG00000018382	33.7362	-1.63249	0.452639	0.0325439	0.0710914
ENSDARG00000021973	159.73	-1.23597	0.329547	0.0325771	0.0711188
ENSDARG00000094210	35.4328	2.16516	0.662409	0.0327656	0.0714535
ENSDARG00000035678	36.2014	1.85492	0.53165	0.0327721	0.0714535
ENSDARG00000076702	39.3801	-1.35862	0.366141	0.0328732	0.0716285
ENSDARG00000037363	69.596	-1.62887	0.451818	0.0329263	0.0716987
ENSDARG00000026229	69.0781	-1.36378	0.367773	0.032966	0.0717396
ENSDARG00000014871	262.663	1.31227	0.352509	0.0332421	0.0722946
ENSDARG00000016188	139.43	-1.31613	0.353813	0.033449	0.0726987
ENSDARG00000101019	32.8414	-1.97185	0.578513	0.0335205	0.0728079
ENSDARG00000017168	17.723	2.02651	0.601345	0.0335491	0.072824
ENSDARG00000063612	31.2748	1.73445	0.488748	0.0335728	0.0728295
ENSDARG00000022315	110.438	1.33576	0.359805	0.0336008	0.0728442
ENSDARG00000063361	12.8408	-2.05407	0.613671	0.0338327	0.0733006
ENSDARG00000063555	96.8496	1.47586	0.403229	0.0340361	0.0736947
ENSDARG00000022952	91.9016	1.37733	0.372773	0.0341205	0.0738311
ENSDARG00000031819	144.417	1.7654	0.500595	0.0343039	0.0741811
ENSDARG00000036359	7.4384	2.50102	0.869423	0.0344179	0.0743808
ENSDARG00000060395	95.9638	-1.68179	0.47141	0.034516	0.074545
ENSDARG00000060071	174.068	-1.18913	0.317216	0.0345373	0.074545
ENSDARG00000018853	28.3397	2.05301	0.614415	0.034576	0.0745618
ENSDARG00000105463	18.1677	2.53227	0.897202	0.0345885	0.0745618
ENSDARG00000059368	64.9971	-1.12734	0.299572	0.0347387	0.0748387
ENSDARG00000025206	194.092	1.34087	0.362213	0.0347886	0.074899
ENSDARG00000076239	10.3708	2.49035	0.862311	0.0348145	0.0749052
ENSDARG00000039830	38.5018	2.631	1.02913	0.0348351	0.0749052
ENSDARG00000003017	26.1006	2.31285	0.744069	0.0348988	0.0749953
ENSDARG00000007285	24.08	2.22199	0.695106	0.035035	0.0752409
ENSDARG00000068179	75.6176	2.01668	0.599592	0.035115	0.0753559
ENSDARG00000042620	36.3294	1.96009	0.57606	0.0351453	0.0753559
ENSDARG00000079483	205.392	-1.11272	0.295639	0.0351544	0.0753559
ENSDARG00000037852	31.811	-1.68486	0.473423	0.0354417	0.0759126
ENSDARG00000008788	110.282	1.27398	0.342664	0.0354583	0.0759126
ENSDARG00000088689	37.2988	-1.74725	0.495443	0.0355179	0.0759927
ENSDARG00000039878	30.9195	1.78586	0.509521	0.0356286	0.0761823
ENSDARG00000034677	20.1544	2.05483	0.617072	0.0357445	0.0763824
ENSDARG00000026892	29.844	1.66357	0.466468	0.0358172	0.0764077
ENSDARG00000012586	262.064	-1.33594	0.361458	0.0358196	0.0764077
ENSDARG00000056740	29.383	1.90582	0.555228	0.035823	0.0764077
ENSDARG00000039649	18.0217	2.14258	0.65749	0.0359015	0.0765274
ENSDARG00000103322	30.3708	2.09461	0.635586	0.0361702	0.0770525
ENSDARG00000099771	37.3533	-1.61807	0.451533	0.0363495	0.0773864
ENSDARG00000069242	8.62576	2.28712	0.733149	0.0364775	0.0776082
ENSDARG00000090149	22.2279	-1.70824	0.482678	0.0365209	0.0776082
ENSDARG00000091609	45.0761	2.60299	0.991007	0.0365215	0.0776082
ENSDARG00000097279	202.997	1.88748	0.549411	0.0369028	0.0783699
ENSDARG00000073786	16.9769	2.33084	0.760114	0.0371723	0.0788935
ENSDARG00000096147	13.8995	-2.08214	0.631813	0.0373459	0.0791653
ENSDARG00000098334	47.2754	1.88256	0.548036	0.0373465	0.0791653
ENSDARG00000057419	34.3152	2.07433	0.628841	0.0377054	0.0798768
ENSDARG00000077489	119.821	-1.34357	0.365128	0.0377839	0.0799938
ENSDARG00000008235	12.1585	2.17224	0.675398	0.0378551	0.0800952
ENSDARG00000036629	4876.51	-1.02753	0.272945	0.0379139	0.0801701
ENSDARG00000098735	14.5097	2.51307	0.894195	0.0379623	0.080223
ENSDARG00000014875	199.33	1.76622	0.504964	0.038007	0.0802682
ENSDARG00000077291	12771.2	-0.989066	0.262209	0.0380363	0.0802807
ENSDARG00000104693	229.255	-1.14476	0.306437	0.0380603	0.080282
ENSDARG00000059079	40.8112	1.77819	0.509755	0.0383979	0.0809444
ENSDARG00000039661	20.3118	-2.01005	0.601759	0.0385405	0.0811951
ENSDARG00000092006	31.5213	-1.98197	0.590157	0.0387901	0.0816708
ENSDARG00000013704	248.282	-0.971013	0.257518	0.0388221	0.0816881
ENSDARG00000052118	18.4003	2.19791	0.69102	0.039319	0.0826402
ENSDARG00000079420	30.3574	-1.87762	0.548476	0.0393227	0.0826402
ENSDARG00000086826	30.429	2.27432	0.73294	0.039718	0.0834199
ENSDARG00000045442	55.6117	2.14945	0.667722	0.0399042	0.0837001
ENSDARG00000104773	80.0863	-1.71656	0.489004	0.0399237	0.0837001
ENSDARG00000019998	26.3615	2.30297	0.749901	0.0399245	0.0837001
ENSDARG00000075222	66.5046	1.6488	0.465409	0.0400975	0.0839849
ENSDARG00000017274	62.5352	2.59188	1.00248	0.0401093	0.0839849
ENSDARG00000006923	185.626	1.35093	0.369034	0.0402777	0.0842862
ENSDARG00000071224	48.5575	1.87496	0.548802	0.0405035	0.0847071
ENSDARG00000024160	27.0993	2.13037	0.659715	0.0406799	0.0850241
ENSDARG00000090914	57.5138	1.85655	0.54198	0.0408298	0.0852857
ENSDARG00000099274	48.3086	-1.50312	0.417486	0.040994	0.0855766
ENSDARG00000040237	277.93	-0.882758	0.233955	0.04114	0.0858291
ENSDARG00000056722	14.3479	2.11396	0.652686	0.0412137	0.0859307
ENSDARG00000056678	34.7185	-1.75528	0.504331	0.0413041	0.086067
ENSDARG00000055966	36.5364	2.00638	0.604043	0.041368	0.0861478
ENSDARG00000102822	32.9266	2.09521	0.644272	0.0415066	0.086384
ENSDARG00000039913	6.63363	2.50107	0.897382	0.0415322	0.0863849
ENSDARG00000006546	10.71	2.30366	0.753946	0.0415963	0.086435
ENSDARG00000052928	12.3206	2.15338	0.672483	0.0416066	0.086435
ENSDARG00000035798	116.787	1.87883	0.551858	0.0418533	0.086895
ENSDARG00000018825	53.0435	2.02999	0.615193	0.0419583	0.0870604
ENSDARG00000056531	12.7029	2.27626	0.738996	0.0421318	0.0873676
ENSDARG00000035987	16.0376	2.23818	0.717958	0.0423216	0.0877082
ENSDARG00000027984	12.3746	2.2017	0.698426	0.0423503	0.0877146
ENSDARG00000005186	57.5547	1.67113	0.475239	0.0424297	0.0877838
ENSDARG00000069560	39.9041	-1.66552	0.473278	0.0424348	0.0877838
ENSDARG00000044551	111.185	-1.19383	0.32318	0.0425807	0.0880326
ENSDARG00000054690	30.257	-1.62396	0.459358	0.0430068	0.0888601
ENSDARG00000077177	48.3849	-1.73806	0.4997	0.043034	0.0888628
ENSDARG00000020043	39.4317	2.09216	0.64598	0.0436369	0.0900535
ENSDARG00000054911	30.9626	1.86033	0.546545	0.0436645	0.0900563
ENSDARG00000007323	81.5093	1.43448	0.397418	0.0437728	0.0902256
ENSDARG00000083389	17.0391	-1.9261	0.573181	0.0438339	0.0902972
ENSDARG00000103117	31.8772	1.70479	0.488538	0.0439767	0.0904965
ENSDARG00000103528	7.96933	2.3434	0.783915	0.0439833	0.0904965
ENSDARG00000041363	27.6532	1.89868	0.562301	0.0441017	0.0906858
ENSDARG00000005652	50.689	-1.68439	0.481403	0.0441397	0.0907096
ENSDARG00000027143	15.6101	2.38126	0.809797	0.0441758	0.0907295
ENSDARG00000026406	18.9077	2.2055	0.703992	0.0443959	0.0911269
ENSDARG00000058206	58.6588	2.29388	0.754077	0.0444592	0.0912025
ENSDARG00000042428	15.3291	2.46079	0.872279	0.0446478	0.0915346
ENSDARG00000099175	434.804	1.21396	0.33028	0.0447626	0.0917153
ENSDARG00000023868	56.8035	1.64171	0.467028	0.0448817	0.0919044
ENSDARG00000030440	165.856	1.74167	0.502797	0.0449655	0.0920212
ENSDARG00000067676	28.1373	-1.62125	0.460081	0.0450557	0.0921509
ENSDARG00000102379	20.3617	1.89934	0.563699	0.0451311	0.0922501
ENSDARG00000041137	24.5691	1.92787	0.575633	0.0453459	0.0926341
ENSDARG00000079111	15.2132	2.4028	0.828467	0.045423	0.0926579
ENSDARG00000075612	61.4528	1.49796	0.419	0.0454272	0.0926579
ENSDARG00000019791	55.4791	-1.12424	0.304196	0.0454385	0.0926579
ENSDARG00000069496	13.4305	2.40397	0.829541	0.0455014	0.0927311
ENSDARG00000104111	17.7028	2.29262	0.755524	0.0455543	0.0927838
ENSDARG00000019881	475.234	-1.1558	0.313517	0.0456236	0.0928698
ENSDARG00000090170	166.616	-1.07611	0.290379	0.0457478	0.0930675
ENSDARG00000101341	13.0311	2.44068	0.859149	0.045851	0.093184
ENSDARG00000007405	27.0319	1.85298	0.545937	0.0458593	0.093184
ENSDARG00000060539	81.1233	-1.45971	0.406983	0.0460233	0.0934618
ENSDARG00000104244	34.9143	1.76029	0.510677	0.0460696	0.0934781
ENSDARG00000080021	8.92835	-2.35289	0.794971	0.0460857	0.0934781
ENSDARG00000102106	54.4385	-1.61407	0.458628	0.0463633	0.0939856
ENSDARG00000104889	137.286	-1.12648	0.305376	0.0465854	0.0943802
ENSDARG00000003127	13.7634	2.31809	0.773866	0.0468163	0.094792
ENSDARG00000105551	12.9928	2.48758	0.904707	0.0468963	0.0948848
ENSDARG00000077307	26.7232	-1.67866	0.481699	0.0469174	0.0948848
ENSDARG00000077967	46.8572	2.15546	0.682083	0.0470168	0.0950299
ENSDARG00000028815	8.2875	2.38119	0.817239	0.0472029	0.0952965
ENSDARG00000075461	95.1568	1.08736	0.294266	0.0472043	0.0952965
ENSDARG00000036754	55.9564	2.00185	0.609558	0.0472904	0.0954144
ENSDARG00000018602	118.319	1.15005	0.312724	0.0475334	0.0958482
ENSDARG00000007485	201.637	-1.20416	0.328796	0.0476186	0.0959637
ENSDARG00000099961	110.263	1.43917	0.401515	0.0478086	0.0962901
ENSDARG00000005559	45.264	1.63114	0.465705	0.0478715	0.0963604
ENSDARG00000087425	280.139	-1.7419	0.505536	0.0479622	0.0964864
ENSDARG00000023181	25.1399	2.02028	0.618969	0.0482653	0.0970392
ENSDARG00000104100	50.5243	-1.46511	0.410268	0.0484022	0.0972576
ENSDARG00000059939	47.9622	1.85718	0.550346	0.0486081	0.0976141
ENSDARG00000075849	315.199	1.12834	0.307011	0.0490195	0.0983829
ENSDARG00000099078	60.8224	-1.32226	0.365516	0.0492713	0.0988304
ENSDARG00000031098	17.428	2.35635	0.804887	0.0494228	0.0990765
ENSDARG00000099624	97.8944	1.36767	0.379786	0.049465	0.0991032
ENSDARG00000092895	16.3464	2.27119	0.750482	0.0496738	0.0994634
ENSDARG00000055989	31.308	-1.7776	0.520466	0.0497462	0.0995503
ENSDARG00000015803	37.9946	-1.91903	0.576983	0.0498783	0.09961
ENSDARG00000077002	33.2241	-1.68736	0.487386	0.050136	0.100859
ENSDARG00000098486	7.40975	2.47523	0.905339	0.050137	0.100865
ENSDARG00000057903	48.6372	1.93281	0.583358	0.0501371	0.100866
ENSDARG00000010059	92.8306	-1.28482	0.354703	0.0501374	0.100867
ENSDARG00000006566	45.5505	1.90573	0.572195	0.0501376	0.100868
ENSDARG00000058454	63.3263	1.92782	0.581959	0.050139	0.100875
ENSDARG00000078210	120.484	1.31417	0.364062	0.0501391	0.100875
ENSDARG00000011602	152.19	1.31793	0.365241	0.0501391	0.100875
ENSDARG00000097718	17.9315	-1.8463	0.548641	0.0501394	0.100876
ENSDARG00000027547	16.1692	2.32991	0.791072	0.0501395	0.100877
ENSDARG00000055360	81.0262	1.64323	0.472728	0.05014	0.100879
ENSDARG00000040990	92.1394	-1.32096	0.366369	0.0501401	0.10088
ENSDARG00000024433	119.732	2.37853	0.826174	0.0501404	0.100881
ENSDARG00000000568	146.308	-1.02764	0.278828	0.0501405	0.100881
ENSDARG00000090872	274.065	1.87837	0.561994	0.0501406	0.100881
ENSDARG00000042344	52.6923	1.74118	0.508668	0.0501412	0.100884
ENSDARG00000059768	606.743	1.38099	0.385464	0.0501414	0.100885
ENSDARG00000078781	101.964	1.53165	0.434905	0.0501426	0.100892
ENSDARG00000100252	55.3472	-1.4736	0.415735	0.0501432	0.100895
ENSDARG00000022788	24.2369	1.93998	0.588859	0.0501436	0.100897
ENSDARG00000009806	19.114	2.05273	0.63999	0.0501446	0.100903
ENSDARG00000104708	410.069	-1.00795	0.27383	0.0501456	0.100908
ENSDARG00000091771	69.857	1.83682	0.547148	0.0501463	0.100912
ENSDARG00000088318	162.887	1.40197	0.39321	0.0501467	0.100914
ENSDARG00000062532	123.691	-1.16452	0.319908	0.0501469	0.100915
ENSDARG00000013343	136.448	1.33486	0.371982	0.0501469	0.100915
ENSDARG00000016239	95.4055	1.47753	0.417879	0.0501471	0.100915
ENSDARG00000025513	62.7801	-1.46862	0.415013	0.0501475	0.100917
ENSDARG00000100129	358.022	1.08549	0.296702	0.050148	0.10092
ENSDARG00000021405	410.614	0.839847	0.226411	0.0501483	0.100921
ENSDARG00000032836	37.9793	2.04886	0.639777	0.0501483	0.100921
ENSDARG00000054063	25.7375	2.28789	0.769903	0.0501485	0.100921
ENSDARG00000101915	46.5762	1.87526	0.563515	0.0501487	0.100922
ENSDARG00000062330	183.74	-0.923381	0.250048	0.0501489	0.100922
ENSDARG00000020573	79.6342	1.33121	0.371244	0.0501492	0.100923
ENSDARG00000105670	15.7905	2.07394	0.652185	0.0501492	0.100923
ENSDARG00000019033	56.8904	1.70867	0.499049	0.0501498	0.100926
ENSDARG00000039682	10.8925	2.37829	0.834377	0.0501503	0.100929
ENSDARG00000041878	26.9709	1.95448	0.597692	0.0501505	0.100929
ENSDARG00000054320	170.784	1.46617	0.415126	0.0501518	0.100937
ENSDARG00000057075	12.7117	2.26233	0.756114	0.050152	0.100938
ENSDARG00000034187	174.971	1.44841	0.40938	0.0501523	0.100939
ENSDARG00000025350	139.855	1.69377	0.494697	0.0501541	0.100949
ENSDARG00000079632	39.1219	2.00723	0.622782	0.0501543	0.100949
ENSDARG00000037362	41.7137	-1.77297	0.524575	0.0501543	0.100949
ENSDARG00000056504	63.9608	1.61142	0.465136	0.0501543	0.100949
ENSDARG00000024295	32.496	1.74711	0.514709	0.0501544	0.100949
ENSDARG00000089976	20.5891	2.05672	0.646159	0.0501545	0.100949
ENSDARG00000003829	41.8498	-1.42811	0.403216	0.0501546	0.100949
ENSDARG00000030241	45.3083	1.87745	0.566729	0.0501557	0.100956
ENSDARG00000079363	76.5542	-1.68611	0.492391	0.050156	0.100957
ENSDARG00000034409	70.0909	1.45173	0.411257	0.0501562	0.100957
ENSDARG00000102418	16.3657	2.11448	0.675808	0.0501567	0.10096
ENSDARG00000026985	69.4563	-1.17076	0.323334	0.0501572	0.100962
ENSDARG00000006215	13.3471	2.38697	0.847093	0.0501572	0.100962
ENSDARG00000101835	41.6382	-1.72602	0.507616	0.0501576	0.100964
ENSDARG00000052769	51.1736	1.52431	0.43586	0.050158	0.100966
ENSDARG00000031770	108.53	-1.00232	0.273776	0.0501581	0.100966
ENSDARG00000098612	103.856	-1.39864	0.394496	0.0501589	0.10097
ENSDARG00000008097	64.3119	1.54669	0.443731	0.0501591	0.100971
ENSDARG00000059738	90.7358	1.06269	0.29153	0.0501593	0.100972
ENSDARG00000089271	293.11	1.367	0.384461	0.0501596	0.100973
ENSDARG00000028957	33.8729	1.94732	0.59809	0.0501603	0.100976
ENSDARG00000013478	105.194	1.63411	0.474776	0.050161	0.10098
ENSDARG00000103483	21.6439	-1.53095	0.439024	0.0501622	0.100987
ENSDARG00000078582	21.4607	1.67794	0.491079	0.0501626	0.100989
ENSDARG00000068701	69.9002	1.49995	0.429093	0.0501651	0.101003
ENSDARG00000003213	123.752	-1.10139	0.303774	0.0501656	0.101006
ENSDARG00000075193	43.6295	-1.59961	0.463612	0.0501657	0.101006
ENSDARG00000007818	61.4917	1.76959	0.526579	0.0501661	0.101008
ENSDARG00000089458	141.234	-0.924056	0.252188	0.0501666	0.10101
ENSDARG00000099257	94.6857	1.60626	0.466272	0.0501671	0.101012
ENSDARG00000056481	544.434	1.21104	0.337038	0.0501674	0.101013
ENSDARG00000061478	570.446	1.38575	0.391884	0.0501675	0.101014
ENSDARG00000076667	60.5221	1.885	0.574386	0.0501699	0.101027
ENSDARG00000059337	60.0741	1.70642	0.5036	0.0501705	0.101031
ENSDARG00000063572	31.2159	1.78621	0.534377	0.0501709	0.101032
ENSDARG00000059804	24.6059	2.02808	0.638955	0.050171	0.101032
ENSDARG00000098592	82.6749	-1.22713	0.342662	0.0501721	0.101038
ENSDARG00000105116	286.175	1.25963	0.352728	0.0501722	0.101038
ENSDARG00000104981	8.72845	-2.168	0.711841	0.0501726	0.10104
ENSDARG00000069031	18.3963	-1.99805	0.625554	0.0501731	0.101042
ENSDARG00000056410	9.14092	2.37574	0.851369	0.0501735	0.101045
ENSDARG00000074425	21.6329	1.95588	0.606523	0.0501738	0.101045
ENSDARG00000017741	59.3194	1.88884	0.577243	0.0501739	0.101045
ENSDARG00000011921	56.7131	1.45769	0.41682	0.0501749	0.101051
ENSDARG00000037941	86.2613	1.73995	0.517457	0.050175	0.101051
ENSDARG00000075133	135.449	-0.993366	0.273167	0.0501754	0.101053
ENSDARG00000037587	51.6187	2.13486	0.695377	0.0501765	0.101059
ENSDARG00000005423	44.4295	2.01152	0.633209	0.0501768	0.10106
ENSDARG00000087693	8.45297	2.40055	0.87595	0.0501769	0.10106
ENSDARG00000005416	21.2271	2.03982	0.647032	0.0501774	0.101062
ENSDARG00000070187	101.937	1.55794	0.451593	0.0501779	0.101065
ENSDARG00000098853	55.715	1.2708	0.357157	0.0501785	0.101068
ENSDARG00000086302	7.76008	2.31412	0.808183	0.0501799	0.101076
ENSDARG00000054290	956.436	-0.834902	0.228091	0.0501805	0.101079
ENSDARG00000004171	49.0753	1.74981	0.522849	0.0501813	0.101083
ENSDARG00000041051	82.0666	-1.13619	0.316283	0.0501819	0.101086
ENSDARG00000040854	66.7179	-1.29001	0.363785	0.0501825	0.101089
ENSDARG00000024141	23.9523	2.36523	0.849718	0.0501826	0.101089
ENSDARG00000077405	194.388	1.31366	0.371468	0.0501838	0.101095
ENSDARG00000021869	24.9243	1.58078	0.460894	0.0501842	0.101097
ENSDARG00000007912	47.9179	-1.44955	0.415882	0.0501848	0.1011
ENSDARG00000036832	150.914	2.49291	1.00925	0.0501856	0.101104
ENSDARG00000056235	77.748	1.66704	0.492655	0.0501865	0.101109
ENSDARG00000053619	9.1201	2.40519	0.889845	0.0501875	0.101114
ENSDARG00000006124	302.225	0.977933	0.270068	0.0501886	0.10112
ENSDARG00000062244	259.122	-0.76675	0.209475	0.0501888	0.101121
ENSDARG00000087330	9.21782	2.36084	0.85155	0.0501899	0.101126
ENSDARG00000091377	8.34196	2.37303	0.862598	0.0501906	0.10113
ENSDARG00000023950	9.98443	2.27896	0.790099	0.0501911	0.101132
ENSDARG00000090834	16.8175	-1.51059	0.437862	0.0501919	0.101136
ENSDARG00000099186	77.5431	-1.13536	0.317337	0.0501925	0.101139
ENSDARG00000012871	88.9146	1.60705	0.47204	0.0501928	0.101141
ENSDARG00000078674	22.2487	-1.76681	0.532416	0.0501931	0.101141
ENSDARG00000101334	6.65814	2.39692	0.887354	0.0501937	0.101144
ENSDARG00000020482	34.5609	1.65793	0.490855	0.0501938	0.101144
ENSDARG00000056793	14.5098	-1.88132	0.580021	0.0501943	0.101147
ENSDARG00000035540	52.3022	-1.12902	0.315692	0.0501948	0.101148
ENSDARG00000068199	21.8176	-1.76658	0.532755	0.0501948	0.101148
ENSDARG00000007135	141.177	1.47643	0.426727	0.050195	0.101149
ENSDARG00000006760	148.237	-0.966152	0.267289	0.0501953	0.10115
ENSDARG00000061233	132.01	1.18657	0.333334	0.0501953	0.10115
ENSDARG00000100206	192.602	1.30977	0.37198	0.0501956	0.101151
ENSDARG00000053753	18.6487	2.3182	0.821732	0.0501962	0.101154
ENSDARG00000035610	92.3525	1.8385	0.562544	0.0501969	0.101156
ENSDARG00000074126	12.538	-2.01024	0.639582	0.0501969	0.101156
ENSDARG00000020841	16.1295	2.24353	0.769678	0.0501973	0.101158
ENSDARG00000014634	25.1855	2.05354	0.66124	0.0501976	0.101159
ENSDARG00000100397	177.644	1.78512	0.540849	0.0501976	0.101159
ENSDARG00000032532	23.6565	1.72986	0.519067	0.0501979	0.10116
ENSDARG00000088810	42.3406	-1.65473	0.490573	0.0501981	0.10116
ENSDARG00000011672	81.7782	1.18769	0.334035	0.0501982	0.10116
ENSDARG00000069615	9.39876	2.45384	0.959522	0.0501983	0.10116
ENSDARG00000036840	263.802	2.09529	0.683246	0.0501986	0.101161
ENSDARG00000070150	56.7521	-1.28505	0.364565	0.0501989	0.101162
ENSDARG00000009280	10.69	2.19603	0.740503	0.0501989	0.101162
ENSDARG00000078902	108.592	-1.08465	0.302874	0.0501998	0.101166
ENSDARG00000067717	16.4374	2.2119	0.750808	0.0502001	0.101167
ENSDARG00000087402	270.656	-0.872534	0.240596	0.0502006	0.101169
ENSDARG00000003776	45.5127	1.94527	0.610315	0.050201	0.101171
ENSDARG00000006290	73.3845	1.8438	0.565918	0.0502013	0.101172
ENSDARG00000097750	10.8539	2.36339	0.862779	0.0502019	0.101175
ENSDARG00000095974	30.6767	-1.82073	0.556561	0.0502023	0.101177
ENSDARG00000014591	19.4903	2.15293	0.716722	0.0502028	0.101178
ENSDARG00000063218	51.3836	1.49727	0.435207	0.0502028	0.101178
ENSDARG00000034396	66.6078	-1.51437	0.44126	0.0502036	0.101182
ENSDARG00000005861	114.191	-1.05965	0.295911	0.0502047	0.101188
ENSDARG00000013443	19.8125	2.43455	0.941064	0.0502051	0.10119
ENSDARG00000052082	95.418	1.65271	0.491315	0.0502053	0.101191
ENSDARG00000101812	22.9064	-1.57607	0.463401	0.0502057	0.101192
ENSDARG00000053665	96.9433	1.65806	0.493481	0.0502061	0.101194
ENSDARG00000089663	15.9328	2.35094	0.855016	0.0502062	0.101194
ENSDARG00000069425	25.7462	2.14942	0.71625	0.0502065	0.101195
ENSDARG00000034497	9.5221	2.33437	0.841468	0.0502069	0.101196
ENSDARG00000101560	154.264	1.26806	0.360293	0.0502071	0.101197
ENSDARG00000026595	26.8367	1.47018	0.426814	0.0502081	0.101202
ENSDARG00000025972	39.4467	1.91221	0.597602	0.0502087	0.101205
ENSDARG00000037919	253.957	1.29594	0.369425	0.050209	0.101206
ENSDARG00000058603	41.5854	-1.52811	0.447142	0.0502098	0.10121
ENSDARG00000099997	11.243	2.23178	0.768349	0.05021	0.10121
ENSDARG00000102923	14.4057	2.00444	0.641599	0.0502118	0.10122
ENSDARG00000043644	48.7206	-1.41008	0.407119	0.0502119	0.10122
ENSDARG00000011376	6.54133	2.4215	0.93276	0.0502127	0.101223
ENSDARG00000037116	36.4566	1.98959	0.634675	0.0502127	0.101223
ENSDARG00000093022	35.7104	1.99161	0.635688	0.0502129	0.101223
ENSDARG00000036942	13.5624	2.13243	0.709358	0.0502135	0.101226
ENSDARG00000025391	125.849	1.3885	0.400182	0.0502135	0.101226
ENSDARG00000002131	302.975	1.26458	0.360067	0.0502138	0.101227
ENSDARG00000060326	34.0068	1.50926	0.441342	0.0502145	0.10123
ENSDARG00000078072	15.441	2.22363	0.765219	0.0502146	0.10123
ENSDARG00000061948	28.4812	-1.60728	0.476653	0.0502162	0.101239
ENSDARG00000105201	62.7077	1.68029	0.504369	0.0502184	0.101251
ENSDARG00000019726	46.3882	-1.72699	0.522523	0.0502187	0.101251
ENSDARG00000098686	35.1813	-1.45545	0.423482	0.0502187	0.101251
ENSDARG00000079779	27.6472	-1.50015	0.438893	0.0502188	0.101251
ENSDARG00000089124	17.4964	2.42935	0.952242	0.0502203	0.101259
ENSDARG00000079446	17.071	2.28411	0.810442	0.0502206	0.10126
ENSDARG00000027088	62.9479	1.73668	0.526836	0.050221	0.101261
ENSDARG00000015866	146.236	2.16243	0.729981	0.0502214	0.101263
ENSDARG00000035505	8.66885	2.38075	0.894909	0.0502217	0.101264
ENSDARG00000009585	97.167	1.60461	0.477021	0.0502236	0.101274
ENSDARG00000094043	19.1636	1.96495	0.626133	0.0502237	0.101274
ENSDARG00000101246	34.6717	1.61614	0.481635	0.0502256	0.101284
ENSDARG00000071684	113.363	-1.26975	0.36323	0.0502258	0.101285
ENSDARG00000075296	23.0025	-1.68611	0.508098	0.0502259	0.101285
ENSDARG00000086150	6.48264	2.26403	0.798837	0.0502265	0.101287
ENSDARG00000056214	8.29762	2.30446	0.832185	0.0502311	0.101312
ENSDARG00000025703	25.9995	-1.7106	0.518746	0.0502316	0.101315
ENSDARG00000059391	84.5807	-1.369	0.396649	0.0502343	0.101329
ENSDARG00000026766	32.0895	-1.945	0.619875	0.0502351	0.101333
ENSDARG00000055216	922.517	2.14821	0.727037	0.0502354	0.101334
ENSDARG00000093469	74.3141	-1.16624	0.33181	0.0502365	0.101339
ENSDARG00000053424	14.9935	2.00581	0.649833	0.0502366	0.101339
ENSDARG00000074502	84.7533	1.60567	0.479722	0.0502366	0.101339
ENSDARG00000069378	16.7869	-1.81661	0.563019	0.0502368	0.101339
ENSDARG00000070174	74.9961	-0.998082	0.280624	0.0502374	0.101342
ENSDARG00000097753	41.3521	1.76531	0.542007	0.0502383	0.101346
ENSDARG00000004034	46.747	1.87282	0.587742	0.0502384	0.101346
ENSDARG00000068624	95.3782	-1.16623	0.332018	0.0502385	0.101346
ENSDARG00000104018	65.5398	1.51161	0.44612	0.050239	0.101347
ENSDARG00000058158	6.79996	2.35066	0.878	0.0502391	0.101347
ENSDARG00000078313	56.862	1.28967	0.371307	0.0502395	0.101349
ENSDARG00000058371	292.799	2.16794	0.740934	0.0502403	0.101353
ENSDARG00000022129	19.0066	2.16374	0.738445	0.0502405	0.101354
ENSDARG00000078748	352.941	-1.07408	0.303876	0.0502408	0.101355
ENSDARG00000092677	27.6613	1.88719	0.594808	0.0502411	0.101355
ENSDARG00000061372	21.5145	2.20955	0.76833	0.0502419	0.101359
ENSDARG00000029479	8.86688	2.31831	0.850312	0.050242	0.101359
ENSDARG00000029292	167.726	-1.11151	0.31556	0.0502432	0.101365
ENSDARG00000070495	17.4826	-1.90197	0.602624	0.0502456	0.101378
ENSDARG00000035188	67.593	-1.43021	0.418863	0.0502461	0.10138
ENSDARG00000071026	41.0774	1.91357	0.608454	0.0502477	0.101388
ENSDARG00000059227	83.2638	2.43427	1.00339	0.0502479	0.101388
ENSDARG00000102755	48.4064	-1.4647	0.431025	0.050248	0.101388
ENSDARG00000006604	8.63031	2.40782	0.953765	0.0502486	0.101391
ENSDARG00000090716	165.678	1.74579	0.536172	0.0502487	0.101391
ENSDARG00000078701	51.1303	-1.49976	0.443462	0.0502491	0.101392
ENSDARG00000070951	14.537	2.19181	0.759918	0.0502497	0.101395
ENSDARG00000019579	39.2337	1.43712	0.421931	0.0502511	0.101402
ENSDARG00000025595	7.0703	2.34169	0.877786	0.0502513	0.101402
ENSDARG00000056642	30.2504	-1.55548	0.463761	0.0502514	0.101402
ENSDARG00000102746	10.2136	2.14747	0.732754	0.0502518	0.101404
ENSDARG00000058349	12.1568	2.28308	0.826823	0.0502523	0.101406
ENSDARG00000092970	17.4988	2.29195	0.834776	0.0502537	0.101413
ENSDARG00000053467	294.542	-1.41653	0.41545	0.0502554	0.101421
ENSDARG00000104071	56.2343	1.42653	0.418983	0.0502562	0.101425
ENSDARG00000056630	66.9946	-1.67331	0.508812	0.0502563	0.101425
ENSDARG00000043283	14.2177	2.18692	0.759685	0.050257	0.101428
ENSDARG00000037284	24.7578	2.1238	0.721439	0.05026	0.101444
ENSDARG00000053200	50.5054	-1.60817	0.484653	0.0502605	0.101446
ENSDARG00000105187	125.591	1.95114	0.629618	0.0502611	0.101449
ENSDARG00000014230	64.6389	-1.33573	0.389097	0.050262	0.101453
ENSDARG00000060435	13.6805	-1.71493	0.526321	0.0502623	0.101454
ENSDARG00000098999	14.5963	2.02322	0.666463	0.0502632	0.101458
ENSDARG00000102976	34.393	1.83933	0.578759	0.0502639	0.101461
ENSDARG00000026489	84.2464	-1.10286	0.314871	0.0502642	0.101462
ENSDARG00000040851	10.7686	-1.93358	0.622263	0.0502655	0.101468
ENSDARG00000017454	73.6542	1.44279	0.425906	0.0502661	0.101471
ENSDARG00000079783	31.6436	1.97134	0.640852	0.0502663	0.101471
ENSDARG00000014727	90.2771	-1.37538	0.403006	0.0502673	0.101476
ENSDARG00000010052	63.3498	1.3616	0.398523	0.0502686	0.101482
ENSDARG00000018461	15.2271	2.25601	0.813955	0.0502691	0.101484
ENSDARG00000038018	110.41	2.26798	0.823652	0.0502697	0.101486
ENSDARG00000100056	64.6231	-1.23023	0.355533	0.0502697	0.101486
ENSDARG00000099390	21.8261	-1.78001	0.554669	0.0502709	0.101492
ENSDARG00000062390	106.817	1.63969	0.498517	0.0502722	0.101498
ENSDARG00000033655	189.724	1.25588	0.364065	0.0502722	0.101498
ENSDARG00000103956	50.9677	-1.28341	0.373105	0.0502729	0.101501
ENSDARG00000057249	117.267	-1.07147	0.305986	0.0502732	0.101502
ENSDARG00000097102	246.704	1.46309	0.433994	0.0502737	0.101503
ENSDARG00000006399	220.008	1.08293	0.309608	0.0502742	0.101505
ENSDARG00000019902	149.509	1.8004	0.564012	0.0502743	0.101505
ENSDARG00000103046	137.428	-1.09102	0.312117	0.0502743	0.101505
ENSDARG00000069940	46.7791	1.92266	0.619485	0.0502756	0.101511
ENSDARG00000054154	309.998	-1.18052	0.3403	0.0502761	0.101512
ENSDARG00000070371	37.5636	-1.51281	0.451988	0.0502761	0.101512
ENSDARG00000059711	13.4036	2.01037	0.663722	0.0502776	0.10152
ENSDARG00000074850	34.0077	-1.35068	0.395961	0.050278	0.101521
ENSDARG00000098497	39.2476	-1.74804	0.543065	0.0502801	0.101531
ENSDARG00000045399	88.6487	1.52803	0.458057	0.0502802	0.101531
ENSDARG00000056453	18.744	2.06542	0.69431	0.0502805	0.101532
ENSDARG00000059177	23.2165	1.72375	0.533389	0.0502818	0.101538
ENSDARG00000019335	28.5189	1.97351	0.645909	0.0502819	0.101538
ENSDARG00000103187	17.5826	-1.54775	0.465598	0.0502826	0.101541
ENSDARG00000044525	76.7508	-1.32627	0.388412	0.0502834	0.101545
ENSDARG00000057910	45.5112	-1.59947	0.485024	0.0502838	0.101546
ENSDARG00000013240	13.4711	-1.96458	0.642005	0.0502842	0.101548
ENSDARG00000045254	85.9244	1.74125	0.541116	0.0502849	0.10155
ENSDARG00000040917	67.9752	2.06175	0.693764	0.0502856	0.101554
ENSDARG00000024276	85.0032	1.32621	0.388757	0.0502868	0.101559
ENSDARG00000098608	14.0657	2.06083	0.693764	0.0502874	0.101561
ENSDARG00000042793	74.189	-1.35644	0.39898	0.0502874	0.101561
ENSDARG00000103714	105.823	-1.19809	0.347113	0.0502888	0.101568
ENSDARG00000005916	91.6818	1.76468	0.551793	0.0502899	0.101573
ENSDARG00000006266	51.9153	1.68512	0.519217	0.05029	0.101573
ENSDARG00000010773	302.921	-0.887315	0.25158	0.0502904	0.101574
ENSDARG00000104068	20.7377	2.27795	0.842428	0.0502906	0.101574
ENSDARG00000006508	36.2995	-1.64159	0.502212	0.0502908	0.101574
ENSDARG00000073883	194.707	-0.859093	0.243376	0.0502932	0.101587
ENSDARG00000095577	29.6715	-1.45102	0.432384	0.0502943	0.101591
ENSDARG00000060849	94.6585	1.64714	0.504919	0.0502943	0.101591
[truncated: 29,702 more rows]

## Sheet: MTZ+olmesartan_MTZ
gene	baseMean	log2FoldChange	lfcSE	pvalue	padj
ENSDARG00000011841	279.165	-5.09602	0.562188	6.69254e-20	1.09892e-16
ENSDARG00000009447	207.39	-4.61581	0.509793	2.01486e-19	1.6542e-16
ENSDARG00000041619	578.84	-3.80081	0.440033	3.34443e-17	1.83052e-14
ENSDARG00000006691	642.892	-3.43714	0.397809	5.53726e-17	2.27304e-14
ENSDARG00000003599	1239.75	-1.83327	0.212685	1.31061e-16	4.30405e-14
ENSDARG00000014690	806.075	-3.36364	0.398125	3.18759e-16	8.72337e-14
ENSDARG00000103007	578.4	-3.65316	0.438634	5.85681e-16	1.37384e-13
ENSDARG00000070437	893.612	-3.25798	0.389973	8.15835e-16	1.6745e-13
ENSDARG00000081423	187.139	-3.90607	0.477123	1.28652e-15	2.34719e-13
ENSDARG00000037071	214.268	-4.88523	0.61629	1.57487e-15	2.58594e-13
ENSDARG00000095273	89.8196	-4.87871	0.623236	3.4493e-15	5.14886e-13
[truncated: 31,690 more rows]
