# Supplementary material for: A zebrafish screen reveals Renin-angiotensin system inhibitors as neuroprotective via mitochondrial restoration in dopamine neurons
Source: eLife. 2021 Sep 22;10:e69795. doi: 10.7554/eLife.69795 (PMC8457844; doi:10.7554/eLife.69795)
Supplement: Figure 5—source data 2. — -CBE/control vs MTZ/control annotations.-CBE/control vs MTZ/control pathway enrichment. -CBE+ olm/CBE vs MTZ+ olm/MTZ annotations. -CBE+ olm/CBE vs MTZ+ olm/MTZ pathway enrichment. [file elife-69795-fig5-data2.xlsx]

## Sheet: Sheet1
Figure 5 - source data 2
GO enrichment analysis with KEGG and Reactome for MTZ, CBE, and olmesartan treatment
Worksheet 1 - Gene annotations for MTZ/Control and CBE/Control
Worksheet 2 - Pathway enrichment for MTZ/Control and CBE/Control
Worksheet 3 -Gene annotations for MTZ+olmesartan/Control and CBE+olmesartan/Control
Worksheet 4 - Pathway enrichment for MTZ+olmesartan/Control and CBE+olmesartan/Control

## Sheet: Annotations_MTZ_CBE
MyList	Gene ID	Type	Tax ID	Homologene Gene ID	Homologene Gene Tax ID	Gene Symbol	Description	Biological Process (GO)	Kinase Class (UniProt)	Protein Function (Protein Atlas)	Subcellular Location (Protein Atlas)	Drug (DrugBank)	Canonical Pathways_x000D_	Hallmark Gene Sets_x000D_	R-HSA-156842 Eukaryotic Translation Elongat	GO:0006119 oxidative phosphorylation	GO:1902600 proton transmembrane transport	WP3888 VEGFA-VEGFR2 Signaling Pathway	GO:0006979 response to oxidative stress	GO:0016236 macroautophagy	GO:0022613 ribonucleoprotein complex biog	CORUM:2920 Respiratory chain complex I (l	GO:0031331 positive regulation of cellula	GO:1903320 regulation of protein modifica	GO:0006123 mitochondrial electron transpo	GO:0055080 cation homeostasis	GO:0051129 negative regulation of cellula	GO:0022411 cellular component disassembly	GO:0031647 regulation of protein stabilit	GO:0099537 trans-synaptic signaling	GO:0080135 regulation of cellular respons	R-HSA-112316 Neuronal System	hsa04072 Phospholipase D signaling path	GO:0045834 positive regulation of lipid m
initial_alias						None	None	None	None	None	None	None	None	None	nan	nan	nan	nan	nan	nan	nan	nan	nan	nan	nan	nan	nan	nan	nan	nan	nan	nan	nan	nan
ENSDARG00000068478	352928	ensembl_gene_id	D. rerio			None	None	None	None	None	None	None	None	None	nan	nan	nan	nan	nan	nan	nan	nan	nan	nan	nan	nan	nan	nan	nan	nan	nan	nan	nan	nan
ENSDARG00000077776	30428	ensembl_gene_id	D. rerio	1460	H. sapiens	CSNK2B	casein kinase 2 beta	GO:0032927 positive regulation of activin receptor signaling pathway;GO:0033211 adiponectin-activated signaling pathway;GO:0003159 morphogenesis of an endothelium		Predicted intracellular proteins; Cancer-related genes:Candidate cancer biomarkers		ATP; Quercetin	(M42)PID DNA PK PATHWAY; (M26)PID NFKAPPAB ATYPICAL PATHWAY; (M185)PID ALK1 PATHWAY	(M5923)HALLMARK PI3K AKT MTOR SIGNALING	1.0	0.0	1.0	1.0	0.0	1.0	0.0	0.0	0.0	0.0	1.0	0.0	0.0	0.0	0.0	0.0	0.0	0.0	1.0	0.0
ENSDARG00000011125	402966	ensembl_gene_id	D. rerio	6638	H. sapiens	SNRPN	small nuclear ribonucleoprotein polypeptide N	GO:0000377 RNA splicing, via transesterification reactions with bulged adenosine as nucleophile;GO:0000398 mRNA splicing, via spliceosome;GO:0000375 RNA splicing, via transesterification reactions		Predicted intracellular proteins	Nucleoplasm (Approved)				1.0	0.0	0.0	0.0	0.0	0.0	0.0	0.0	0.0	0.0	0.0	0.0	0.0	0.0	0.0	0.0	0.0	0.0	0.0	0.0
ENSDARG00000069826	436855	ensembl_gene_id	D. rerio	1415	H. sapiens	CRYBB2	crystallin beta B2	GO:0002088 lens development in camera-type eye;GO:0007601 visual perception;GO:0050953 sensory perception of light stimulus		Disease related genes; Predicted intracellular proteins	Nucleoplasm (Approved)				0.0	0.0	0.0	0.0	0.0	0.0	0.0	0.0	0.0	0.0	0.0	0.0	0.0	0.0	0.0	0.0	0.0	0.0	0.0	0.0
ENSDARG00000105551	100333117	ensembl_gene_id	D. rerio			None	None	None	None	None	None	None	None	None	nan	nan	nan	nan	nan	nan	nan	nan	nan	nan	nan	nan	nan	nan	nan	nan	nan	nan	nan	nan
ENSDARG00000071060	406643	ensembl_gene_id	D. rerio	8260	H. sapiens	NAA10	N-alpha-acetyltransferase 10, NatA catalytic subunit	GO:0071960 maintenance of mitotic sister chromatid cohesion, centromeric;GO:2000718 regulation of maintenance of mitotic sister chromatid cohesion, centromeric;GO:2000719 negative regulation of maintenance of mitotic sister chromatid cohesion, centromeric		Disease related genes; ENZYME proteins:Transferases; Enzymes; Potential drug targets; Predicted intracellular proteins	Cytosol (Supported); Additional: Nucleoli		(M180)PID HIF1A PATHWAY		0.0	0.0	0.0	0.0	0.0	0.0	0.0	0.0	0.0	0.0	0.0	0.0	1.0	0.0	0.0	0.0	0.0	0.0	0.0	0.0
ENSDARG00000068912	777626	ensembl_gene_id	D. rerio	81628	H. sapiens	TSC22D4	TSC22 domain family member 4	GO:0006970 response to osmotic stress;GO:0009628 response to abiotic stimulus;GO:0045892 negative regulation of transcription, DNA-templated		Transcription factors:Basic domains; Predicted intracellular proteins	Cytosol (Approved)				0.0	0.0	0.0	0.0	0.0	0.0	0.0	0.0	0.0	0.0	0.0	0.0	0.0	0.0	0.0	0.0	0.0	0.0	0.0	0.0
ENSDARG00000053502	100000769	ensembl_gene_id	D. rerio	1409	H. sapiens	CRYAA	crystallin alpha A	GO:0042026 protein refolding;GO:0032387 negative regulation of intracellular transport;GO:0050821 protein stabilization		Disease related genes; Predicted intracellular proteins	Cytosol (Approved); Additional: Nucleoplasm				0.0	0.0	0.0	0.0	0.0	0.0	0.0	0.0	0.0	0.0	0.0	0.0	0.0	0.0	1.0	0.0	0.0	0.0	0.0	0.0
ENSDARG00000096003	794625	ensembl_gene_id	D. rerio	84833	H. sapiens	ATP5MK	ATP synthase membrane subunit k				Mitochondria (Supported)				0.0	0.0	0.0	0.0	0.0	0.0	0.0	0.0	0.0	0.0	0.0	0.0	0.0	0.0	0.0	0.0	0.0	0.0	0.0	0.0
ENSDARG00000101009	100006037	ensembl_gene_id	D. rerio			None	None	None	None	None	None	None	None	None	nan	nan	nan	nan	nan	nan	nan	nan	nan	nan	nan	nan	nan	nan	nan	nan	nan	nan	nan	nan
ENSDARG00000069801	100000256	ensembl_gene_id	D. rerio	1415	H. sapiens	CRYBB2	crystallin beta B2	GO:0002088 lens development in camera-type eye;GO:0007601 visual perception;GO:0050953 sensory perception of light stimulus		Disease related genes; Predicted intracellular proteins	Nucleoplasm (Approved)				0.0	0.0	0.0	0.0	0.0	0.0	0.0	0.0	0.0	0.0	0.0	0.0	0.0	0.0	0.0	0.0	0.0	0.0	0.0	0.0
ENSDARG00000086917	558501	ensembl_gene_id	D. rerio	1415	H. sapiens	CRYBB2	crystallin beta B2	GO:0002088 lens development in camera-type eye;GO:0007601 visual perception;GO:0050953 sensory perception of light stimulus		Disease related genes; Predicted intracellular proteins	Nucleoplasm (Approved)				0.0	0.0	0.0	0.0	0.0	0.0	0.0	0.0	0.0	0.0	0.0	0.0	0.0	0.0	0.0	0.0	0.0	0.0	0.0	0.0
ENSDARG00000063912	140541	ensembl_gene_id	D. rerio	4514	H. sapiens	COX3	cytochrome c oxidase subunit III	GO:0006123 mitochondrial electron transport, cytochrome c to oxygen;GO:0019646 aerobic electron transport chain;GO:0008535 respiratory chain complex IV assembly		Disease related genes; Transporters:Primary Active Transporters; Potential drug targets		Cholic Acid; N-Formylmethionine			0.0	1.0	1.0	0.0	0.0	0.0	0.0	0.0	0.0	0.0	1.0	0.0	0.0	0.0	0.0	0.0	0.0	0.0	0.0	0.0
ENSDARG00000035993	436950	ensembl_gene_id	D. rerio	6612	H. sapiens	SUMO3	small ubiquitin like modifier 3	GO:0043392 negative regulation of DNA binding;GO:0016925 protein sumoylation;GO:0051101 regulation of DNA binding		Predicted intracellular proteins	Nuclear bodies;Nucleoplasm (Enhanced)				0.0	0.0	0.0	0.0	0.0	0.0	0.0	0.0	0.0	0.0	0.0	0.0	0.0	0.0	0.0	0.0	0.0	0.0	0.0	0.0
ENSDARG00000044719						None	None	None	None	None	None	None	None	None	nan	nan	nan	nan	nan	nan	nan	nan	nan	nan	nan	nan	nan	nan	nan	nan	nan	nan	nan	nan
ENSDARG00000029995	445029	ensembl_gene_id	D. rerio	7136	H. sapiens	TNNI2	troponin I2, fast skeletal type	GO:0030049 muscle filament sliding;GO:0033275 actin-myosin filament sliding;GO:0003009 skeletal muscle contraction		Disease related genes; Predicted intracellular proteins	Plasma membrane (Approved); Additional: Intermediate filaments			(M5909)HALLMARK MYOGENESIS	0.0	0.0	0.0	0.0	0.0	0.0	0.0	0.0	0.0	0.0	0.0	0.0	0.0	0.0	0.0	1.0	0.0	0.0	0.0	0.0
ENSDARG00000013615	58140	ensembl_gene_id	D. rerio			None	None	None	None	None	None	None	None	None	nan	nan	nan	nan	nan	nan	nan	nan	nan	nan	nan	nan	nan	nan	nan	nan	nan	nan	nan	nan
ENSDARG00000003058	415215	ensembl_gene_id	D. rerio	11116	H. sapiens	CEP43	centrosomal protein 43	GO:0034453 microtubule anchoring;GO:0061099 negative regulation of protein tyrosine kinase activity;GO:0050732 negative regulation of peptidyl-tyrosine phosphorylation		Cancer-related genes; Disease related genes; Predicted intracellular proteins	Centrosome (Supported)				0.0	0.0	1.0	1.0	0.0	0.0	0.0	0.0	0.0	0.0	0.0	0.0	0.0	0.0	0.0	0.0	0.0	0.0	0.0	0.0
ENSDARG00000104839	100009658	ensembl_gene_id	D. rerio			None	None	None	None	None	None	None	None	None	nan	nan	nan	nan	nan	nan	nan	nan	nan	nan	nan	nan	nan	nan	nan	nan	nan	nan	nan	nan
ENSDARG00000036329	415243	ensembl_gene_id	D. rerio	4694	H. sapiens	NDUFA1	NADH:ubiquinone oxidoreductase subunit A1	GO:0006120 mitochondrial electron transport, NADH to ubiquinone;GO:0010257 NADH dehydrogenase complex assembly;GO:0032981 mitochondrial respiratory chain complex I assembly		Disease related genes	Cytosol;Mitochondria (Approved)	NADH		(M5936)HALLMARK OXIDATIVE PHOSPHORYLATION	0.0	1.0	0.0	0.0	0.0	0.0	0.0	0.0	0.0	0.0	0.0	0.0	0.0	0.0	0.0	0.0	0.0	0.0	0.0	0.0
ENSDARG00000014690	449547	ensembl_gene_id	D. rerio	6191	H. sapiens	RPS4X	ribosomal protein S4 X-linked	GO:0006614 SRP-dependent cotranslational protein targeting to membrane;GO:0006613 cotranslational protein targeting to membrane;GO:0045047 protein targeting to ER		Ribosomal proteins; Predicted intracellular proteins			(M16801)SIG REGULATION OF THE ACTIN CYTOSKELETON BY RHO GTPASES; (M5193)SIG CHEMOTAXIS		1.0	0.0	0.0	0.0	1.0	0.0	0.0	0.0	0.0	0.0	0.0	0.0	0.0	0.0	0.0	0.0	0.0	0.0	0.0	0.0
ENSDARG00000099664	352923	ensembl_gene_id	D. rerio	9403	H. sapiens	SELENOF	selenoprotein F	GO:0051084 'de novo' posttranslational protein folding;GO:0006458 'de novo' protein folding;GO:0006457 protein folding		Predicted intracellular proteins	Nucleoli (Approved); Additional: Cytosol				0.0	0.0	0.0	0.0	0.0	0.0	0.0	0.0	0.0	0.0	0.0	0.0	0.0	0.0	0.0	0.0	0.0	0.0	0.0	0.0
ENSDARG00000035023	321686	ensembl_gene_id	D. rerio	22889	H. sapiens	KHDC4	KH domain containing 4, pre-mRNA splicing factor	GO:0006376 mRNA splice site selection;GO:0000245 spliceosomal complex assembly;GO:0022618 ribonucleoprotein complex assembly		Predicted intracellular proteins	Nucleoplasm (Supported)				0.0	0.0	0.0	0.0	0.0	0.0	1.0	0.0	0.0	0.0	0.0	0.0	0.0	0.0	0.0	0.0	0.0	0.0	0.0	0.0
ENSDARG00000096721						None	None	None	None	None	None	None	None	None	nan	nan	nan	nan	nan	nan	nan	nan	nan	nan	nan	nan	nan	nan	nan	nan	nan	nan	nan	nan
ENSDARG00000028581	393454	ensembl_gene_id	D. rerio	51528	H. sapiens	JKAMP	JNK1/MAPK8 associated membrane protein	GO:0030433 ubiquitin-dependent ERAD pathway;GO:0036503 ERAD pathway;GO:0006986 response to unfolded protein		Cancer-related genes:Candidate cancer biomarkers	Vesicles (Approved); Additional: Nucleoplasm				0.0	0.0	0.0	0.0	0.0	0.0	0.0	0.0	1.0	0.0	0.0	0.0	0.0	0.0	0.0	0.0	0.0	0.0	0.0	0.0
ENSDARG00000100392	192300	ensembl_gene_id	D. rerio	6222	H. sapiens	RPS18	ribosomal protein S18	GO:0006614 SRP-dependent cotranslational protein targeting to membrane;GO:0006613 cotranslational protein targeting to membrane;GO:0045047 protein targeting to ER		Ribosomal proteins; Predicted intracellular proteins	Cytosol (Supported)	Artenimol			1.0	0.0	0.0	0.0	0.0	0.0	0.0	0.0	0.0	0.0	0.0	0.0	0.0	0.0	0.0	0.0	0.0	0.0	0.0	0.0
ENSDARG00000079455	561122	ensembl_gene_id	D. rerio	57502	H. sapiens	NLGN4X	neuroligin 4 X-linked	GO:0003360 brainstem development;GO:0097105 presynaptic membrane assembly;GO:0090394 negative regulation of excitatory postsynaptic potential		Disease related genes; Predicted intracellular proteins					0.0	0.0	0.0	0.0	0.0	0.0	0.0	0.0	0.0	0.0	0.0	0.0	0.0	0.0	0.0	1.0	0.0	1.0	0.0	0.0
ENSDARG00000081103						None	None	None	None	None	None	None	None	None	nan	nan	nan	nan	nan	nan	nan	nan	nan	nan	nan	nan	nan	nan	nan	nan	nan	nan	nan	nan
ENSDARG00000099269						None	None	None	None	None	None	None	None	None	nan	nan	nan	nan	nan	nan	nan	nan	nan	nan	nan	nan	nan	nan	nan	nan	nan	nan	nan	nan
ENSDARG00000055514	100005083	ensembl_gene_id	D. rerio	6275	H. sapiens	S100A4	S100 calcium binding protein A4	GO:0001837 epithelial to mesenchymal transition;GO:0043123 positive regulation of I-kappaB kinase/NF-kappaB signaling;GO:0048762 mesenchymal cell differentiation		Predicted intracellular proteins; Cancer-related genes:Candidate cancer biomarkers	Plasma membrane (Enhanced)	Trifluoperazine; Copper	(M5883)NABA SECRETED FACTORS; (M5885)NABA MATRISOME ASSOCIATED; (M5889)NABA MATRISOME	(M5944)HALLMARK ANGIOGENESIS; (M5891)HALLMARK HYPOXIA; (M5939)HALLMARK P53 PATHWAY	0.0	0.0	0.0	0.0	0.0	0.0	0.0	0.0	0.0	1.0	0.0	0.0	0.0	0.0	0.0	0.0	0.0	0.0	0.0	0.0
ENSDARG00000103929	393364	ensembl_gene_id	D. rerio	286676	H. sapiens	ILDR1	immunoglobulin like domain containing receptor 1	GO:1990830 cellular response to leukemia inhibitory factor;GO:1990823 response to leukemia inhibitory factor;GO:0090277 positive regulation of peptide hormone secretion		Disease related genes; Predicted intracellular proteins					0.0	0.0	0.0	0.0	0.0	0.0	0.0	0.0	0.0	0.0	0.0	0.0	0.0	0.0	0.0	0.0	0.0	0.0	0.0	0.0
ENSDARG00000039493	541516	ensembl_gene_id	D. rerio	51126	H. sapiens	NAA20	N-alpha-acetyltransferase 20, NatB catalytic subunit	GO:0017196 N-terminal peptidyl-methionine acetylation;GO:0018206 peptidyl-methionine modification;GO:0006474 N-terminal protein amino acid acetylation		ENZYME proteins:Transferases; Enzymes; Predicted intracellular proteins	Cytosol (Supported)				0.0	0.0	0.0	0.0	0.0	0.0	0.0	0.0	0.0	0.0	0.0	0.0	0.0	0.0	0.0	0.0	0.0	0.0	0.0	0.0
ENSDARG00000025397	368925	ensembl_gene_id	D. rerio	6428	H. sapiens	SRSF3	serine and arginine rich splicing factor 3	GO:1990830 cellular response to leukemia inhibitory factor;GO:1990823 response to leukemia inhibitory factor;GO:0031124 mRNA 3'-end processing		Cancer-related genes; Predicted intracellular proteins	Nucleoplasm (Supported)			(M5926)HALLMARK MYC TARGETS V1	1.0	0.0	0.0	0.0	0.0	0.0	0.0	0.0	0.0	0.0	0.0	0.0	0.0	0.0	0.0	0.0	0.0	0.0	0.0	0.0
ENSDARG00000076719						None	None	None	None	None	None	None	None	None	nan	nan	nan	nan	nan	nan	nan	nan	nan	nan	nan	nan	nan	nan	nan	nan	nan	nan	nan	nan
ENSDARG00000019444	326701	ensembl_gene_id	D. rerio	6748	H. sapiens	SSR4	signal sequence receptor subunit 4			Disease related genes	Endoplasmic reticulum (Supported)				1.0	0.0	0.0	1.0	0.0	0.0	0.0	0.0	0.0	0.0	0.0	0.0	0.0	0.0	0.0	0.0	0.0	0.0	0.0	0.0
ENSDARG00000023160	393292	ensembl_gene_id	D. rerio	9410	H. sapiens	SNRNP40	small nuclear ribonucleoprotein U5 subunit 40	GO:0000377 RNA splicing, via transesterification reactions with bulged adenosine as nucleophile;GO:0000398 mRNA splicing, via spliceosome;GO:0000375 RNA splicing, via transesterification reactions		Predicted intracellular proteins	Nuclear speckles (Supported)				1.0	0.0	0.0	0.0	0.0	0.0	0.0	0.0	0.0	0.0	0.0	0.0	0.0	0.0	0.0	0.0	0.0	0.0	0.0	0.0
ENSDARG00000078785	393742	ensembl_gene_id	D. rerio	746	H. sapiens	TMEM258	transmembrane protein 258	GO:0006487 protein N-linked glycosylation;GO:0006486 protein glycosylation;GO:0043413 macromolecule glycosylation			Cytosol (Approved); Additional: Plasma membrane				0.0	0.0	1.0	0.0	0.0	0.0	0.0	0.0	0.0	0.0	0.0	0.0	0.0	0.0	0.0	0.0	0.0	0.0	0.0	0.0
ENSDARG00000079274	322453	ensembl_gene_id	D. rerio	5645	H. sapiens	PRSS2	serine protease 2	GO:0030574 collagen catabolic process;GO:0022617 extracellular matrix disassembly;GO:0032963 collagen metabolic process		Peptidases:Serine-type peptidases; Enzymes; Predicted secreted proteins; ENZYME proteins:Hydrolases	Vesicles (Approved); Additional: Endoplasmic reticulum	Monoisopropylphosphorylserine; O-Benzylsulfonyl-Serine; Benzylamine; Benzamidine; Phosphorylisopropane; Phenethylamine; 3-Phenylpropylamine	(M3468)NABA ECM REGULATORS; (M5885)NABA MATRISOME ASSOCIATED; (M5889)NABA MATRISOME	(M5930)HALLMARK EPITHELIAL MESENCHYMAL TRANSITION	0.0	0.0	0.0	0.0	0.0	0.0	0.0	0.0	0.0	0.0	0.0	0.0	0.0	1.0	0.0	0.0	0.0	0.0	0.0	0.0
ENSDARG00000041435	641289	ensembl_gene_id	D. rerio	7311	H. sapiens	UBA52	ubiquitin A-52 residue ribosomal protein fusion product 1	GO:0042276 error-prone translesion synthesis;GO:0000717 nucleotide-excision repair, DNA duplex unwinding;GO:0070987 error-free translesion synthesis		Ribosomal proteins; Predicted intracellular proteins	Cytosol;Endoplasmic reticulum (Approved); Additional: Nucleoplasm;Plasma membrane				1.0	0.0	0.0	0.0	0.0	0.0	0.0	0.0	1.0	1.0	1.0	0.0	0.0	0.0	0.0	0.0	1.0	0.0	1.0	0.0
ENSDARG00000035871	336713	ensembl_gene_id	D. rerio	6156	H. sapiens	RPL30	ribosomal protein L30	GO:1904571 positive regulation of selenocysteine incorporation;GO:1904569 regulation of selenocysteine incorporation;GO:0045901 positive regulation of translational elongation		Ribosomal proteins; Predicted intracellular proteins	Cytosol;Endoplasmic reticulum (Approved)				1.0	0.0	0.0	0.0	0.0	0.0	0.0	0.0	0.0	0.0	0.0	0.0	0.0	1.0	0.0	0.0	0.0	0.0	0.0	0.0
ENSDARG00000040778	445255	ensembl_gene_id	D. rerio	5899	H. sapiens	RALB	RAS like proto-oncogene B	GO:0001927 exocyst assembly;GO:0001928 regulation of exocyst assembly;GO:0060178 regulation of exocyst localization		RAS pathway related proteins; Predicted intracellular proteins			(M76)PID P38 ALPHA BETA PATHWAY; (M136)PID FOXO PATHWAY; (M124)PID CXCR4 PATHWAY	(M5923)HALLMARK PI3K AKT MTOR SIGNALING	0.0	0.0	0.0	0.0	0.0	1.0	0.0	0.0	1.0	0.0	0.0	0.0	0.0	0.0	0.0	0.0	1.0	0.0	1.0	0.0
ENSDARG00000000069	58093	ensembl_gene_id	D. rerio	1611	H. sapiens	DAP	death associated protein	GO:0034198 cellular response to amino acid starvation;GO:1990928 response to amino acid starvation;GO:0010507 negative regulation of autophagy		Predicted intracellular proteins	Mitochondria;Vesicles (Approved); Additional: Nucleoplasm			(M5902)HALLMARK APOPTOSIS	0.0	0.0	0.0	0.0	0.0	1.0	0.0	0.0	0.0	0.0	0.0	0.0	0.0	0.0	0.0	0.0	0.0	0.0	0.0	0.0
ENSDARG00000037790	360208	ensembl_gene_id	D. rerio	654231	H. sapiens	OCM	oncomodulin			Predicted intracellular proteins	Plasma membrane (Approved); Additional: Cytosol				0.0	0.0	0.0	0.0	0.0	0.0	0.0	0.0	0.0	0.0	0.0	0.0	0.0	0.0	0.0	0.0	0.0	0.0	0.0	0.0
ENSDARG00000026582	550498	ensembl_gene_id	D. rerio	23479	H. sapiens	ISCU	iron-sulfur cluster assembly enzyme	GO:1904439 negative regulation of ferrous iron import across plasma membrane;GO:0034757 negative regulation of iron ion transport;GO:0034760 negative regulation of iron ion transmembrane transport		Disease related genes; Predicted intracellular proteins	Cytosol (Supported)			(M5946)HALLMARK COAGULATION; (M5936)HALLMARK OXIDATIVE PHOSPHORYLATION; (M5939)HALLMARK P53 PATHWAY	0.0	1.0	1.0	0.0	0.0	0.0	0.0	0.0	0.0	0.0	0.0	1.0	0.0	0.0	0.0	0.0	0.0	0.0	0.0	0.0
ENSDARG00000092947	30327	ensembl_gene_id	D. rerio	3872	H. sapiens	KRT17	keratin 17	GO:0051798 positive regulation of hair follicle development;GO:0042635 positive regulation of hair cycle;GO:0051797 regulation of hair follicle development		Predicted intracellular proteins; Disease related genes; Cancer-related genes:Candidate cancer biomarkers	Intermediate filaments (Enhanced)		(M115)PID REG GR PATHWAY	(M5939)HALLMARK P53 PATHWAY	1.0	0.0	0.0	0.0	0.0	0.0	0.0	0.0	0.0	0.0	0.0	0.0	0.0	0.0	0.0	0.0	0.0	0.0	0.0	0.0
ENSDARG00000100703	336034	ensembl_gene_id	D. rerio			None	None	None	None	None	None	None	None	None	nan	nan	nan	nan	nan	nan	nan	nan	nan	nan	nan	nan	nan	nan	nan	nan	nan	nan	nan	nan
ENSDARG00000103566	436971	ensembl_gene_id	D. rerio	9804	H. sapiens	TOMM20	translocase of outer mitochondrial membrane 20	GO:0016031 tRNA import into mitochondrion;GO:1905242 response to 3,3',5-triiodo-L-thyronine;GO:0035927 RNA import into mitochondrion			Mitochondria (Enhanced)				1.0	1.0	1.0	0.0	0.0	1.0	0.0	0.0	0.0	0.0	0.0	0.0	0.0	0.0	0.0	0.0	0.0	0.0	0.0	0.0
ENSDARG00000056099	751713	ensembl_gene_id	D. rerio	404672	H. sapiens	GTF2H5	general transcription factor IIH subunit 5	GO:0070816 phosphorylation of RNA polymerase II C-terminal domain;GO:0006293 nucleotide-excision repair, preincision complex stabilization;GO:0006295 nucleotide-excision repair, DNA incision, 3'-to lesion		Disease related genes; Predicted intracellular proteins				(M5898)HALLMARK DNA REPAIR	1.0	0.0	0.0	0.0	0.0	0.0	1.0	0.0	0.0	0.0	1.0	0.0	0.0	0.0	0.0	0.0	0.0	0.0	0.0	0.0
ENSDARG00000026109	792763	ensembl_gene_id	D. rerio	55652	H. sapiens	SLC48A1	solute carrier family 48 member 1	GO:0015886 heme transport;GO:1901678 iron coordination entity transport;GO:0051181 cofactor transport		Transporters:Electrochemical Potential-driven transporters; Predicted intracellular proteins	Vesicles (Supported)				0.0	0.0	0.0	0.0	0.0	0.0	0.0	0.0	0.0	0.0	0.0	0.0	0.0	0.0	0.0	0.0	0.0	0.0	0.0	0.0
ENSDARG00000023220	352917	ensembl_gene_id	D. rerio	51714	H. sapiens	SELENOT	selenoprotein T	GO:0060124 positive regulation of growth hormone secretion;GO:0001514 selenocysteine incorporation;GO:0006451 translational readthrough		Potential drug targets; Disease related genes; ENZYME proteins:Oxidoreductases; Enzymes					1.0	0.0	0.0	0.0	1.0	0.0	0.0	0.0	0.0	0.0	0.0	1.0	0.0	1.0	0.0	0.0	0.0	0.0	0.0	0.0
ENSDARG00000030602	393723	ensembl_gene_id	D. rerio	6223	H. sapiens	RPS19	ribosomal protein S19	GO:0060265 positive regulation of respiratory burst involved in inflammatory response;GO:0060266 negative regulation of respiratory burst involved in inflammatory response;GO:0060268 negative regulation of respiratory burst		Disease related genes; Ribosomal proteins; Predicted intracellular proteins	Nucleoplasm (Supported)	Artenimol		(M5950)HALLMARK ALLOGRAFT REJECTION	1.0	0.0	0.0	1.0	0.0	1.0	1.0	0.0	0.0	0.0	0.0	0.0	0.0	0.0	0.0	0.0	0.0	0.0	0.0	0.0
ENSDARG00000083179	100033768	ensembl_gene_id	D. rerio			None	None	None	None	None	None	None	None	None	nan	nan	nan	nan	nan	nan	nan	nan	nan	nan	nan	nan	nan	nan	nan	nan	nan	nan	nan	nan
ENSDARG00000014577	321330	ensembl_gene_id	D. rerio	85415	H. sapiens	RHPN2	rhophilin Rho GTPase binding protein 2	GO:0007165 signal transduction;GO:0023052 signaling;GO:0007154 cell communication		Predicted intracellular proteins					0.0	0.0	0.0	0.0	0.0	0.0	0.0	0.0	0.0	0.0	0.0	0.0	0.0	0.0	0.0	0.0	0.0	0.0	0.0	0.0
ENSDARG00000039830	337838	ensembl_gene_id	D. rerio	2787	H. sapiens	GNG5	G protein subunit gamma 5	GO:0007186 G protein-coupled receptor signaling pathway;GO:0007165 signal transduction;GO:0023052 signaling		RAS pathway related proteins; Predicted intracellular proteins					0.0	1.0	0.0	0.0	0.0	0.0	0.0	0.0	0.0	0.0	0.0	0.0	0.0	0.0	0.0	0.0	0.0	1.0	0.0	0.0
ENSDARG00000093844	692313	ensembl_gene_id	D. rerio	440387	H. sapiens	CTRB2	chymotrypsinogen B2	GO:0009235 cobalamin metabolic process;GO:0033013 tetrapyrrole metabolic process;GO:0022617 extracellular matrix disassembly		ENZYME proteins:Hydrolases; Enzymes; Peptidases:Serine-type peptidases; Predicted secreted proteins; Predicted intracellular proteins					0.0	0.0	0.0	0.0	0.0	0.0	0.0	0.0	0.0	0.0	0.0	0.0	0.0	1.0	0.0	0.0	0.0	0.0	0.0	0.0
ENSDARG00000022438	335774	ensembl_gene_id	D. rerio	1337	H. sapiens	COX6A1	cytochrome c oxidase subunit 6A1	GO:0006123 mitochondrial electron transport, cytochrome c to oxygen;GO:0019646 aerobic electron transport chain;GO:0009060 aerobic respiration		Disease related genes	Mitochondria (Supported)			(M5905)HALLMARK ADIPOGENESIS; (M5936)HALLMARK OXIDATIVE PHOSPHORYLATION	0.0	1.0	1.0	0.0	0.0	0.0	0.0	0.0	0.0	0.0	1.0	0.0	0.0	0.0	0.0	0.0	0.0	0.0	0.0	0.0
ENSDARG00000003068	492770	ensembl_gene_id	D. rerio			None	None	None	None	None	None	None	None	None	nan	nan	nan	nan	nan	nan	nan	nan	nan	nan	nan	nan	nan	nan	nan	nan	nan	nan	nan	nan
ENSDARG00000103736	555179	ensembl_gene_id	D. rerio	196996	H. sapiens	GRAMD2A	GRAM domain containing 2A	GO:0061817 endoplasmic reticulum-plasma membrane tethering;GO:0051643 endoplasmic reticulum localization;GO:2001256 regulation of store-operated calcium entry		Predicted intracellular proteins	Nuclear speckles;Nucleoli (Approved); Additional: Cytosol				0.0	0.0	0.0	0.0	0.0	0.0	0.0	0.0	0.0	0.0	0.0	0.0	0.0	0.0	0.0	0.0	0.0	0.0	0.0	0.0
ENSDARG00000102558	393758	ensembl_gene_id	D. rerio			None	None	None	None	None	None	None	None	None	nan	nan	nan	nan	nan	nan	nan	nan	nan	nan	nan	nan	nan	nan	nan	nan	nan	nan	nan	nan
ENSDARG00000011208						None	None	None	None	None	None	None	None	None	nan	nan	nan	nan	nan	nan	nan	nan	nan	nan	nan	nan	nan	nan	nan	nan	nan	nan	nan	nan
ENSDARG00000013623	322126	ensembl_gene_id	D. rerio	7417	H. sapiens	VDAC2	voltage dependent anion channel 2	GO:0007339 binding of sperm to zona pellucida;GO:0097345 mitochondrial outer membrane permeabilization;GO:1902110 positive regulation of mitochondrial membrane permeability involved in apoptotic process		Transporters:Transporter channels and pores; Predicted intracellular proteins	Mitochondria (Supported)	Aluminium monostearate; PRLX 93936		(M5902)HALLMARK APOPTOSIS; (M5936)HALLMARK OXIDATIVE PHOSPHORYLATION	0.0	1.0	1.0	0.0	0.0	0.0	0.0	0.0	0.0	0.0	0.0	0.0	1.0	0.0	0.0	0.0	0.0	0.0	0.0	0.0
ENSDARG00000076790	798701	ensembl_gene_id	D. rerio	1415	H. sapiens	CRYBB2	crystallin beta B2	GO:0002088 lens development in camera-type eye;GO:0007601 visual perception;GO:0050953 sensory perception of light stimulus		Disease related genes; Predicted intracellular proteins	Nucleoplasm (Approved)				0.0	0.0	0.0	0.0	0.0	0.0	0.0	0.0	0.0	0.0	0.0	0.0	0.0	0.0	0.0	0.0	0.0	0.0	0.0	0.0
ENSDARG00000027200	403036	ensembl_gene_id	D. rerio	11345	H. sapiens	GABARAPL2	GABA type A receptor associated protein like 2	GO:0006995 cellular response to nitrogen starvation;GO:0043562 cellular response to nitrogen levels;GO:0006891 intra-Golgi vesicle-mediated transport		Predicted intracellular proteins	Cytosol;Nucleoplasm (Uncertain); Additional: Nuclear bodies			(M5909)HALLMARK MYOGENESIS	1.0	1.0	0.0	0.0	0.0	1.0	0.0	0.0	1.0	0.0	0.0	0.0	0.0	1.0	0.0	0.0	0.0	0.0	0.0	0.0
ENSDARG00000022684	335335	ensembl_gene_id	D. rerio	2280	H. sapiens	FKBP1A	FKBP prolyl isomerase 1A	GO:1901393 negative regulation of transforming growth factor beta1 activation;GO:1901389 negative regulation of transforming growth factor beta activation;GO:1901392 regulation of transforming growth factor beta1 activation		Enzymes; FDA approved drug targets:Small molecule drugs; ENZYME proteins:Isomerase; Transporters:Accessory Factors Involved in Transport; Predicted intracellular proteins		Pimecrolimus; Tacrolimus; Sirolimus; (3R)-4-(p-toluenesulfonyl)-1,4-thiazane-3-carboxylicacid-L-phenylalanine ethyl ester; {3-[3-(3,4-Dimethoxy-Phenyl)-1-(1-{1-[2-(3,4,5-Trimethoxy-Phenyl)-Butyryl]-Piperidin-2yl}-Vinyloxy)-Propyl]-Phenoxy}-Acetic Acid; Gpi-1046; Methyl Methylsulfinylmethyl Sulfide; FKB-001; Heptyl glucoside; L-709,587; (3r)-4-(P-Toluenesulfonyl)-1,4-Thiazane-3-Carboxylicacid-L-Le…	(M203)PID ALK2 PATHWAY; (M185)PID ALK1 PATHWAY; (M235)PID TCR CALCIUM PATHWAY	(M5896)HALLMARK TGF BETA SIGNALING	0.0	0.0	1.0	0.0	0.0	0.0	0.0	0.0	0.0	1.0	0.0	1.0	0.0	0.0	0.0	0.0	0.0	0.0	0.0	0.0
ENSDARG00000015222	394041	ensembl_gene_id	D. rerio	79872	H. sapiens	CBLL1	Cbl proto-oncogene like 1	GO:0035635 entry of bacterium into host cell;GO:0080009 mRNA methylation;GO:0016556 mRNA modification		ENZYME proteins:Transferases; Enzymes; Predicted intracellular proteins	Nuclear speckles (Supported)		(M142)PID AJDISS 2PATHWAY		0.0	0.0	0.0	1.0	0.0	0.0	0.0	0.0	0.0	0.0	0.0	0.0	0.0	0.0	0.0	0.0	0.0	0.0	0.0	0.0
ENSDARG00000055901	550429	ensembl_gene_id	D. rerio	79689	H. sapiens	STEAP4	STEAP4 metalloreductase	GO:0015677 copper ion import;GO:0070207 protein homotrimerization;GO:0006825 copper ion transport		Transporters:Transport Electron Carriers	Nucleoplasm;Plasma membrane (Approved)			(M5908)HALLMARK ANDROGEN RESPONSE	0.0	1.0	0.0	0.0	0.0	0.0	0.0	0.0	0.0	0.0	0.0	1.0	0.0	0.0	0.0	0.0	0.0	0.0	0.0	0.0
ENSDARG00000043453	192297	ensembl_gene_id	D. rerio	6193	H. sapiens	RPS5	ribosomal protein S5	GO:0006450 regulation of translational fidelity;GO:0000028 ribosomal small subunit assembly;GO:0042255 ribosome assembly		Ribosomal proteins; Predicted intracellular proteins	Cytosol;Endoplasmic reticulum (Supported)	Artenimol		(M5926)HALLMARK MYC TARGETS V1	1.0	0.0	0.0	0.0	0.0	0.0	1.0	0.0	0.0	0.0	0.0	0.0	0.0	0.0	0.0	0.0	0.0	0.0	0.0	0.0
ENSDARG00000005926	321793	ensembl_gene_id	D. rerio	204	H. sapiens	AK2	adenylate kinase 2	GO:0006172 ADP biosynthetic process;GO:0009180 purine ribonucleoside diphosphate biosynthetic process;GO:0009136 purine nucleoside diphosphate biosynthetic process		Disease related genes; ENZYME proteins:Transferases; Enzymes; Potential drug targets; Predicted intracellular proteins	Mitochondria (Approved)	Bis(Adenosine)-5'-Pentaphosphate; Imidazole		(M5905)HALLMARK ADIPOGENESIS; (M5925)HALLMARK E2F TARGETS	0.0	1.0	1.0	0.0	0.0	0.0	0.0	0.0	0.0	0.0	0.0	0.0	0.0	0.0	0.0	0.0	0.0	0.0	0.0	0.0
ENSDARG00000041925	436857	ensembl_gene_id	D. rerio	1412	H. sapiens	CRYBA2	crystallin beta A2	GO:0002088 lens development in camera-type eye;GO:0007601 visual perception;GO:0050953 sensory perception of light stimulus		Disease related genes; Predicted intracellular proteins					0.0	0.0	0.0	0.0	0.0	0.0	0.0	0.0	0.0	0.0	0.0	0.0	0.0	0.0	0.0	0.0	0.0	0.0	0.0	0.0
ENSDARG00000105098	768171	ensembl_gene_id	D. rerio	1810	H. sapiens	DR1	down-regulator of transcription 1	GO:0051123 RNA polymerase II preinitiation complex assembly;GO:0070897 transcription preinitiation complex assembly;GO:0043966 histone H3 acetylation		Predicted intracellular proteins	Nucleoplasm (Supported)			(M5901)HALLMARK G2M CHECKPOINT	0.0	0.0	0.0	0.0	0.0	0.0	0.0	0.0	0.0	0.0	0.0	0.0	0.0	0.0	0.0	0.0	0.0	0.0	0.0	0.0
ENSDARG00000054890	550575	ensembl_gene_id	D. rerio	5995	H. sapiens	RGR	retinal G protein coupled receptor	GO:0018298 protein-chromophore linkage;GO:0007602 phototransduction;GO:0009584 detection of visible light		Disease related genes; G-protein coupled receptors:GPCRs excl olfactory receptors; Potential drug targets; G-protein coupled receptors:Opsins; Predicted intracellular proteins					0.0	0.0	0.0	0.0	0.0	0.0	0.0	0.0	0.0	0.0	0.0	0.0	0.0	0.0	0.0	0.0	0.0	0.0	0.0	0.0
ENSDARG00000014348	393507	ensembl_gene_id	D. rerio	9262	H. sapiens	STK17B	serine/threonine kinase 17b	GO:2000271 positive regulation of fibroblast apoptotic process;GO:2000269 regulation of fibroblast apoptotic process;GO:0044346 fibroblast apoptotic process	CAMK Ser/Thr protein kinase family	ENZYME proteins:Transferases; Enzymes; Kinases:CAMK Ser/Thr protein kinases; Predicted intracellular proteins	Cytosol;Plasma membrane (Uncertain)	Quercetin; Fostamatinib			0.0	0.0	0.0	0.0	0.0	0.0	0.0	0.0	0.0	0.0	0.0	0.0	0.0	0.0	0.0	0.0	0.0	0.0	0.0	0.0
ENSDARG00000095897	798291	ensembl_gene_id	D. rerio	514	H. sapiens	ATP5F1E	ATP synthase F1 subunit epsilon	GO:0042776 mitochondrial ATP synthesis coupled proton transport;GO:0015985 energy coupled proton transport, down electrochemical gradient;GO:0015986 ATP synthesis coupled proton transport		Disease related genes; Predicted intracellular proteins				(M5936)HALLMARK OXIDATIVE PHOSPHORYLATION	0.0	1.0	1.0	0.0	0.0	0.0	0.0	0.0	0.0	0.0	0.0	0.0	0.0	0.0	0.0	0.0	0.0	0.0	0.0	0.0
ENSDARG00000053829	30558	ensembl_gene_id	D. rerio	5083	H. sapiens	PAX9	paired box 9	GO:0042481 regulation of odontogenesis;GO:0060325 face morphogenesis;GO:0060323 head morphogenesis		Predicted intracellular proteins; Disease related genes; Transcription factors:Helix-turn-helix domains	Mitochondria (Approved); Additional: Nucleoplasm				0.0	0.0	0.0	0.0	0.0	0.0	0.0	0.0	0.0	0.0	0.0	0.0	0.0	0.0	0.0	0.0	0.0	0.0	0.0	0.0
ENSDARG00000042845	352920	ensembl_gene_id	D. rerio	551	H. sapiens	AVP	arginine vasopressin	GO:0002125 maternal aggressive behavior;GO:0007621 negative regulation of female receptivity;GO:0032849 positive regulation of cellular pH reduction		Disease related genes; Predicted secreted proteins					0.0	1.0	0.0	0.0	1.0	0.0	0.0	0.0	0.0	0.0	0.0	1.0	1.0	0.0	0.0	1.0	0.0	0.0	1.0	1.0
ENSDARG00000040286	393331	ensembl_gene_id	D. rerio	84993	H. sapiens	UBL7	ubiquitin like 7	GO:0006511 ubiquitin-dependent protein catabolic process;GO:0019941 modification-dependent protein catabolic process;GO:0043632 modification-dependent macromolecule catabolic process		Predicted intracellular proteins	Nucleoplasm (Approved); Additional: Cytosol				0.0	0.0	0.0	0.0	0.0	0.0	0.0	0.0	1.0	0.0	0.0	0.0	0.0	0.0	0.0	0.0	0.0	0.0	0.0	0.0
ENSDARG00000083528	100033610	ensembl_gene_id	D. rerio			None	None	None	None	None	None	None	None	None	nan	nan	nan	nan	nan	nan	nan	nan	nan	nan	nan	nan	nan	nan	nan	nan	nan	nan	nan	nan
ENSDARG00000023852	393669	ensembl_gene_id	D. rerio	25804	H. sapiens	LSM4	LSM4 homolog, U6 small nuclear RNA and mRNA degradation associated	GO:0033962 cytoplasmic mRNA processing body assembly;GO:0043928 exonucleolytic nuclear-transcribed mRNA catabolic process involved in deadenylation-dependent decay;GO:0000291 nuclear-transcribed mRNA catabolic process, exonucleolytic		Predicted intracellular proteins	Vesicles (Approved)			(M5922)HALLMARK UNFOLDED PROTEIN RESPONSE	1.0	0.0	0.0	0.0	0.0	0.0	1.0	0.0	0.0	0.0	0.0	0.0	0.0	0.0	0.0	0.0	0.0	0.0	0.0	0.0
ENSDARG00000032929	550433	ensembl_gene_id	D. rerio	1415	H. sapiens	CRYBB2	crystallin beta B2	GO:0002088 lens development in camera-type eye;GO:0007601 visual perception;GO:0050953 sensory perception of light stimulus		Disease related genes; Predicted intracellular proteins	Nucleoplasm (Approved)				0.0	0.0	0.0	0.0	0.0	0.0	0.0	0.0	0.0	0.0	0.0	0.0	0.0	0.0	0.0	0.0	0.0	0.0	0.0	0.0
ENSDARG00000069792	558470	ensembl_gene_id	D. rerio	1415	H. sapiens	CRYBB2	crystallin beta B2	GO:0002088 lens development in camera-type eye;GO:0007601 visual perception;GO:0050953 sensory perception of light stimulus		Disease related genes; Predicted intracellular proteins	Nucleoplasm (Approved)				0.0	0.0	0.0	0.0	0.0	0.0	0.0	0.0	0.0	0.0	0.0	0.0	0.0	0.0	0.0	0.0	0.0	0.0	0.0	0.0
ENSDARG00000034777	402938	ensembl_gene_id	D. rerio	25828	H. sapiens	TXN2	thioredoxin 2	GO:0006662 glycerol ether metabolic process;GO:0000098 sulfur amino acid catabolic process;GO:0018904 ether metabolic process		Disease related genes; Predicted intracellular proteins	Mitochondria (Enhanced)				1.0	0.0	0.0	0.0	1.0	1.0	0.0	0.0	0.0	0.0	0.0	0.0	0.0	0.0	0.0	0.0	0.0	0.0	0.0	0.0
ENSDARG00000105018	492485	ensembl_gene_id	D. rerio	55222	H. sapiens	LRRC20	leucine rich repeat containing 20			Predicted intracellular proteins	Nucleoplasm (Approved); Additional: Cytosol				0.0	0.0	0.0	0.0	0.0	0.0	0.0	0.0	0.0	0.0	0.0	0.0	0.0	0.0	0.0	0.0	0.0	0.0	0.0	0.0
ENSDARG00000018637	436772	ensembl_gene_id	D. rerio	23480	H. sapiens	SEC61G	SEC61 translocon subunit gamma	GO:0031204 posttranslational protein targeting to membrane, translocation;GO:0006620 posttranslational protein targeting to endoplasmic reticulum membrane;GO:0065002 intracellular protein transmembrane transport		Transporters:Primary Active Transporters					1.0	0.0	0.0	0.0	0.0	0.0	0.0	0.0	0.0	0.0	0.0	0.0	0.0	0.0	0.0	0.0	0.0	0.0	0.0	0.0
ENSDARG00000038901	550283	ensembl_gene_id	D. rerio	254863	H. sapiens	TMEM256	transmembrane protein 256	GO:0008150 biological_process		Predicted intracellular proteins	Vesicles (Approved)				0.0	0.0	0.0	0.0	0.0	0.0	0.0	0.0	0.0	0.0	0.0	0.0	0.0	0.0	0.0	0.0	0.0	0.0	0.0	0.0
ENSDARG00000057322	406640	ensembl_gene_id	D. rerio	83604	H. sapiens	TMEM47	transmembrane protein 47	GO:0098609 cell-cell adhesion;GO:0007155 cell adhesion;GO:0022610 biological adhesion			Nuclear membrane (Approved)				0.0	0.0	0.0	0.0	0.0	0.0	0.0	0.0	0.0	0.0	0.0	0.0	0.0	0.0	0.0	0.0	0.0	0.0	0.0	0.0
ENSDARG00000015915	558307	ensembl_gene_id	D. rerio			None	None	None	None	None	None	None	None	None	nan	nan	nan	nan	nan	nan	nan	nan	nan	nan	nan	nan	nan	nan	nan	nan	nan	nan	nan	nan
ENSDARG00000080152	100033605	ensembl_gene_id	D. rerio			None	None	None	None	None	None	None	None	None	nan	nan	nan	nan	nan	nan	nan	nan	nan	nan	nan	nan	nan	nan	nan	nan	nan	nan	nan	nan
ENSDARG00000063908	140540	ensembl_gene_id	D. rerio	4513	H. sapiens	COX2	cytochrome c oxidase subunit II	GO:0010729 positive regulation of hydrogen peroxide biosynthetic process;GO:0010726 positive regulation of hydrogen peroxide metabolic process;GO:0010728 regulation of hydrogen peroxide biosynthetic process		Disease related genes; Transporters:Primary Active Transporters; Potential drug targets		Cholic Acid; N-Formylmethionine; Talmapimod	(M223)PID BETA CATENIN NUC PATHWAY		0.0	1.0	1.0	0.0	0.0	0.0	0.0	0.0	0.0	0.0	1.0	0.0	0.0	0.0	0.0	0.0	0.0	0.0	0.0	0.0
ENSDARG00000006588	550501	ensembl_gene_id	D. rerio	4153	H. sapiens	MBL2	mannose binding lectin 2	GO:0008228 opsonization;GO:0001867 complement activation, lectin pathway;GO:0006953 acute-phase response		Predicted secreted proteins		O3-Sulfonylgalactose; Methyl alpha-D-mannoside; 4-(Hydrogen sulfate)-beta-D-galactopyranose; Methyl beta-L-fucopyranoside; N-acetyl-alpha-neuraminic acid; alpha-L-methyl-fucose; Alpha-Methyl-N-Acetyl-D-Glucosamine	(M5880)NABA ECM AFFILIATED; (M5885)NABA MATRISOME ASSOCIATED; (M5889)NABA MATRISOME	(M5946)HALLMARK COAGULATION; (M5934)HALLMARK XENOBIOTIC METABOLISM; (M5950)HALLMARK ALLOGRAFT REJECTION	0.0	0.0	0.0	0.0	1.0	0.0	0.0	0.0	0.0	0.0	0.0	0.0	0.0	0.0	0.0	0.0	0.0	0.0	0.0	0.0
ENSDARG00000040674	553744	ensembl_gene_id	D. rerio	10217	H. sapiens	CTDSPL	CTD small phosphatase like	GO:2000134 negative regulation of G1/S transition of mitotic cell cycle;GO:1902807 negative regulation of cell cycle G1/S phase transition;GO:2000045 regulation of G1/S transition of mitotic cell cycle		Enzymes; Predicted intracellular proteins; ENZYME proteins:Hydrolases	Vesicles (Approved); Additional: Nucleoplasm		(M228)PID SMAD2 3PATHWAY; (M181)PID BMP PATHWAY		0.0	0.0	0.0	0.0	0.0	0.0	0.0	0.0	0.0	0.0	0.0	0.0	0.0	0.0	0.0	0.0	0.0	0.0	0.0	0.0
ENSDARG00000069624	569841	ensembl_gene_id	D. rerio	51023	H. sapiens	MRPS18C	mitochondrial ribosomal protein S18C	GO:0070125 mitochondrial translational elongation;GO:0070126 mitochondrial translational termination;GO:0006415 translational termination		Ribosomal proteins; Predicted intracellular proteins					1.0	0.0	0.0	0.0	0.0	0.0	0.0	0.0	0.0	0.0	0.0	0.0	0.0	1.0	0.0	0.0	0.0	0.0	0.0	0.0
ENSDARG00000074001	554132	ensembl_gene_id	D. rerio	1415	H. sapiens	CRYBB2	crystallin beta B2	GO:0002088 lens development in camera-type eye;GO:0007601 visual perception;GO:0050953 sensory perception of light stimulus		Disease related genes; Predicted intracellular proteins	Nucleoplasm (Approved)				0.0	0.0	0.0	0.0	0.0	0.0	0.0	0.0	0.0	0.0	0.0	0.0	0.0	0.0	0.0	0.0	0.0	0.0	0.0	0.0
ENSDARG00000097797	100001229	ensembl_gene_id	D. rerio	100188893	H. sapiens	TOMM6	translocase of outer mitochondrial membrane 6	GO:0016236 macroautophagy;GO:0006914 autophagy;GO:0061919 process utilizing autophagic mechanism		Predicted intracellular proteins	Mitochondria (Supported)				0.0	0.0	0.0	0.0	0.0	1.0	0.0	0.0	0.0	0.0	0.0	0.0	0.0	0.0	0.0	0.0	0.0	0.0	0.0	0.0
ENSDARG00000054355	337565	ensembl_gene_id	D. rerio	10238	H. sapiens	DCAF7	DDB1 and CUL4 associated factor 7	GO:0043687 post-translational protein modification;GO:0016567 protein ubiquitination;GO:0032446 protein modification by small protein conjugation		Predicted intracellular proteins	Nucleoplasm (Supported); Additional: Cytosol				0.0	0.0	0.0	0.0	0.0	0.0	0.0	0.0	0.0	0.0	0.0	0.0	0.0	0.0	0.0	0.0	0.0	0.0	0.0	0.0
ENSDARG00000037867	402883	ensembl_gene_id	D. rerio	9551	H. sapiens	ATP5MF	ATP synthase membrane subunit f	GO:0042776 mitochondrial ATP synthesis coupled proton transport;GO:0015985 energy coupled proton transport, down electrochemical gradient;GO:0015986 ATP synthesis coupled proton transport		Predicted intracellular proteins	Mitochondria (Supported); Additional: Nuclear membrane			(M5936)HALLMARK OXIDATIVE PHOSPHORYLATION	0.0	1.0	1.0	0.0	0.0	0.0	0.0	0.0	0.0	0.0	0.0	0.0	0.0	0.0	0.0	0.0	0.0	0.0	0.0	0.0
ENSDARG00000089204	100190889	ensembl_gene_id	D. rerio	221710	H. sapiens	SMIM13	small integral membrane protein 13				Golgi apparatus;Nuclear membrane;Nucleoplasm (Approved)				0.0	0.0	0.0	0.0	0.0	0.0	0.0	0.0	0.0	0.0	0.0	0.0	0.0	0.0	0.0	0.0	0.0	0.0	0.0	0.0
ENSDARG00000010244	735250	ensembl_gene_id	D. rerio	200916	H. sapiens	RPL22L1	ribosomal protein L22 like 1	GO:0002181 cytoplasmic translation;GO:0006412 translation;GO:0043043 peptide biosynthetic process		Ribosomal proteins; Predicted intracellular proteins	Nucleoli;Nucleoli rim (Approved); Additional: Nucleoplasm				1.0	0.0	0.0	0.0	0.0	0.0	0.0	0.0	0.0	0.0	0.0	0.0	0.0	0.0	0.0	0.0	0.0	0.0	0.0	0.0
ENSDARG00000039626	567608	ensembl_gene_id	D. rerio	4900	H. sapiens	NRGN	neurogranin	GO:0099170 postsynaptic modulation of chemical synaptic transmission;GO:1900273 positive regulation of long-term synaptic potentiation;GO:1900271 regulation of long-term synaptic potentiation		Predicted intracellular proteins					0.0	0.0	0.0	0.0	0.0	0.0	0.0	0.0	0.0	0.0	0.0	0.0	0.0	0.0	0.0	1.0	0.0	1.0	0.0	0.0
ENSDARG00000091001	677757	ensembl_gene_id	D. rerio	26292	H. sapiens	MYCBP	MYC binding protein	GO:0007283 spermatogenesis;GO:0048232 male gamete generation;GO:0007276 gamete generation		Predicted intracellular proteins	Nucleoplasm (Approved); Additional: Mitochondria		(M17)PID NOTCH PATHWAY		0.0	0.0	0.0	0.0	0.0	0.0	0.0	0.0	0.0	0.0	0.0	0.0	0.0	0.0	0.0	0.0	0.0	0.0	0.0	0.0
ENSDARG00000045490	393764	ensembl_gene_id	D. rerio	4708	H. sapiens	NDUFB2	NADH:ubiquinone oxidoreductase subunit B2	GO:0006120 mitochondrial electron transport, NADH to ubiquinone;GO:0010257 NADH dehydrogenase complex assembly;GO:0032981 mitochondrial respiratory chain complex I assembly		Predicted intracellular proteins	Nucleoplasm (Uncertain); Additional: Mitochondria	NADH		(M5936)HALLMARK OXIDATIVE PHOSPHORYLATION	0.0	1.0	0.0	0.0	0.0	0.0	0.0	0.0	0.0	0.0	0.0	0.0	0.0	0.0	0.0	0.0	0.0	0.0	0.0	0.0
ENSDARG00000086658	569000	ensembl_gene_id	D. rerio	1415	H. sapiens	CRYBB2	crystallin beta B2	GO:0002088 lens development in camera-type eye;GO:0007601 visual perception;GO:0050953 sensory perception of light stimulus		Disease related genes; Predicted intracellular proteins	Nucleoplasm (Approved)				0.0	0.0	0.0	0.0	0.0	0.0	0.0	0.0	0.0	0.0	0.0	0.0	0.0	0.0	0.0	0.0	0.0	0.0	0.0	0.0
ENSDARG00000016903	406372	ensembl_gene_id	D. rerio	11091	H. sapiens	WDR5	WD repeat domain 5	GO:0051572 negative regulation of histone H3-K4 methylation;GO:0045722 positive regulation of gluconeogenesis;GO:0043981 histone H4-K5 acetylation		Predicted intracellular proteins	Nucleoplasm (Supported)		(M95)PID CIRCADIAN PATHWAY		0.0	0.0	0.0	0.0	0.0	0.0	0.0	0.0	0.0	0.0	0.0	0.0	1.0	0.0	0.0	0.0	0.0	0.0	0.0	0.0
ENSDARG00000062463	100002370	ensembl_gene_id	D. rerio	340554	H. sapiens	ZC3H12B	zinc finger CCCH-type containing 12B	GO:0090502 RNA phosphodiester bond hydrolysis, endonucleolytic;GO:0090501 RNA phosphodiester bond hydrolysis;GO:0090305 nucleic acid phosphodiester bond hydrolysis		Predicted intracellular proteins	Endoplasmic reticulum (Approved); Additional: Golgi apparatus;Vesicles				0.0	0.0	0.0	0.0	0.0	0.0	0.0	0.0	0.0	0.0	0.0	0.0	0.0	0.0	0.0	0.0	0.0	0.0	0.0	0.0
ENSDARG00000006691	327089	ensembl_gene_id	D. rerio	6136	H. sapiens	RPL12	ribosomal protein L12	GO:0006614 SRP-dependent cotranslational protein targeting to membrane;GO:0006613 cotranslational protein targeting to membrane;GO:0045047 protein targeting to ER		Ribosomal proteins; Predicted intracellular proteins	Golgi apparatus (Approved)				1.0	0.0	0.0	0.0	0.0	0.0	0.0	0.0	0.0	0.0	0.0	0.0	0.0	0.0	0.0	0.0	0.0	0.0	0.0	0.0
ENSDARG00000039185	550227	ensembl_gene_id	D. rerio	4801	H. sapiens	NFYB	nuclear transcription factor Y subunit beta	GO:0045540 regulation of cholesterol biosynthetic process;GO:0106118 regulation of sterol biosynthetic process;GO:0090181 regulation of cholesterol metabolic process		Transcription factors:Other all-alpha-helical DNA-binding domains; Predicted intracellular proteins	Nucleoplasm (Supported)		(M254)PID MYC REPRESS PATHWAY; (M145)PID P53 DOWNSTREAM PATHWAY	(M5922)HALLMARK UNFOLDED PROTEIN RESPONSE	0.0	0.0	0.0	0.0	0.0	0.0	0.0	0.0	0.0	0.0	0.0	0.0	0.0	0.0	0.0	0.0	0.0	0.0	0.0	1.0
ENSDARG00000030408	393715	ensembl_gene_id	D. rerio	6231	H. sapiens	RPS26	ribosomal protein S26	GO:0033119 negative regulation of RNA splicing;GO:0002181 cytoplasmic translation;GO:0006614 SRP-dependent cotranslational protein targeting to membrane		Disease related genes; Ribosomal proteins; Predicted intracellular proteins	Cytosol;Endoplasmic reticulum (Enhanced); Additional: Nucleoli				1.0	0.0	0.0	0.0	0.0	0.0	0.0	0.0	0.0	0.0	0.0	0.0	0.0	0.0	0.0	0.0	0.0	0.0	0.0	0.0
ENSDARG00000102055	336606	ensembl_gene_id	D. rerio	3032	H. sapiens	HADHB	hydroxyacyl-CoA dehydrogenase trifunctional multienzyme complex subunit beta	GO:0035965 cardiolipin acyl-chain remodeling;GO:0032048 cardiolipin metabolic process;GO:0046471 phosphatidylglycerol metabolic process		Disease related genes; ENZYME proteins:Transferases; Enzymes; Potential drug targets; Predicted intracellular proteins	Mitochondria (Supported)			(M5935)HALLMARK FATTY ACID METABOLISM; (M5936)HALLMARK OXIDATIVE PHOSPHORYLATION	0.0	1.0	0.0	0.0	0.0	0.0	0.0	0.0	0.0	0.0	0.0	0.0	0.0	0.0	0.0	0.0	0.0	0.0	0.0	1.0
ENSDARG00000005799	402894	ensembl_gene_id	D. rerio	201895	H. sapiens	SMIM14	small integral membrane protein 14	GO:0001835 blastocyst hatching;GO:0035188 hatching;GO:0071684 organism emergence from protective structure		Predicted intracellular proteins					0.0	0.0	0.0	0.0	0.0	0.0	0.0	0.0	0.0	0.0	0.0	0.0	0.0	0.0	0.0	0.0	0.0	0.0	0.0	0.0
ENSDARG00000104537	336118	ensembl_gene_id	D. rerio			None	None	None	None	None	None	None	None	None	nan	nan	nan	nan	nan	nan	nan	nan	nan	nan	nan	nan	nan	nan	nan	nan	nan	nan	nan	nan
ENSDARG00000094561	794522	ensembl_gene_id	D. rerio			None	None	None	None	None	None	None	None	None	nan	nan	nan	nan	nan	nan	nan	nan	nan	nan	nan	nan	nan	nan	nan	nan	nan	nan	nan	nan
ENSDARG00000041592	415246	ensembl_gene_id	D. rerio	54165	H. sapiens	DCUN1D1	defective in cullin neddylation 1 domain containing 1	GO:2000436 positive regulation of protein neddylation;GO:2000434 regulation of protein neddylation;GO:0045116 protein neddylation		Predicted intracellular proteins	Nucleoplasm (Approved); Additional: Cytosol			(M5945)HALLMARK HEME METABOLISM	0.0	0.0	0.0	0.0	0.0	0.0	0.0	0.0	0.0	1.0	0.0	0.0	0.0	0.0	0.0	0.0	1.0	0.0	0.0	0.0
ENSDARG00000070427	100144627	ensembl_gene_id	D. rerio			None	None	None	None	None	None	None	None	None	nan	nan	nan	nan	nan	nan	nan	nan	nan	nan	nan	nan	nan	nan	nan	nan	nan	nan	nan	nan
ENSDARG00000038577	494577	ensembl_gene_id	D. rerio	1345	H. sapiens	COX6C	cytochrome c oxidase subunit 6C	GO:0006123 mitochondrial electron transport, cytochrome c to oxygen;GO:0019646 aerobic electron transport chain;GO:0009060 aerobic respiration			Mitochondria (Supported)	Cholic Acid; N-Formylmethionine		(M5907)HALLMARK ESTROGEN RESPONSE LATE; (M5936)HALLMARK OXIDATIVE PHOSPHORYLATION	0.0	1.0	1.0	0.0	0.0	0.0	0.0	0.0	0.0	0.0	1.0	0.0	0.0	0.0	0.0	0.0	0.0	0.0	0.0	0.0
ENSDARG00000024548	553178	ensembl_gene_id	D. rerio	1413	H. sapiens	CRYBA4	crystallin beta A4	GO:0002088 lens development in camera-type eye;GO:0007601 visual perception;GO:0050953 sensory perception of light stimulus		Disease related genes; Predicted intracellular proteins					0.0	0.0	0.0	0.0	0.0	0.0	0.0	0.0	0.0	0.0	0.0	0.0	0.0	0.0	0.0	0.0	0.0	0.0	0.0	0.0
ENSDARG00000036500	445072	ensembl_gene_id	D. rerio	116224	H. sapiens	PABIR1	PP2A Aalpha (PPP2R1A) and B55A (PPP2R2A) interacting phosphatase regulator 1	GO:0044818 mitotic G2/M transition checkpoint;GO:0032515 negative regulation of phosphoprotein phosphatase activity;GO:0035308 negative regulation of protein dephosphorylation		Predicted intracellular proteins	Nuclear bodies (Approved); Additional: Nucleoplasm				0.0	0.0	0.0	0.0	0.0	0.0	0.0	0.0	1.0	0.0	0.0	0.0	0.0	0.0	0.0	0.0	0.0	0.0	0.0	0.0
ENSDARG00000041623	100174951	ensembl_gene_id	D. rerio			None	None	None	None	None	None	None	None	None	nan	nan	nan	nan	nan	nan	nan	nan	nan	nan	nan	nan	nan	nan	nan	nan	nan	nan	nan	nan
ENSDARG00000060489	751730	ensembl_gene_id	D. rerio	64983	H. sapiens	MRPL32	mitochondrial ribosomal protein L32	GO:0070125 mitochondrial translational elongation;GO:0070126 mitochondrial translational termination;GO:0006415 translational termination		Ribosomal proteins; Predicted intracellular proteins					1.0	0.0	0.0	0.0	0.0	0.0	0.0	0.0	0.0	0.0	0.0	0.0	0.0	1.0	0.0	0.0	0.0	0.0	0.0	0.0
ENSDARG00000015790	30468	ensembl_gene_id	D. rerio	483	H. sapiens	ATP1B3	ATPase Na+/K+ transporting subunit beta 3	GO:1903276 regulation of sodium ion export across plasma membrane;GO:1903278 positive regulation of sodium ion export across plasma membrane;GO:1903288 positive regulation of potassium ion import		CD markers; Transporters:Primary Active Transporters; Predicted intracellular proteins	Plasma membrane (Supported)			(M5905)HALLMARK ADIPOGENESIS	1.0	0.0	1.0	0.0	0.0	0.0	0.0	0.0	0.0	0.0	1.0	1.0	0.0	0.0	1.0	1.0	0.0	0.0	0.0	0.0
ENSDARG00000103288	100330789	ensembl_gene_id	D. rerio	55066	H. sapiens	PDPR	pyruvate dehydrogenase phosphatase regulatory subunit	GO:0010510 regulation of acetyl-CoA biosynthetic process from pyruvate;GO:0050812 regulation of acyl-CoA biosynthetic process;GO:0042762 regulation of sulfur metabolic process		Predicted intracellular proteins	Mitochondria (Approved)				0.0	1.0	1.0	0.0	0.0	0.0	0.0	0.0	0.0	0.0	0.0	0.0	0.0	0.0	0.0	0.0	0.0	0.0	0.0	1.0
ENSDARG00000029500	394097	ensembl_gene_id	D. rerio	6164	H. sapiens	RPL34	ribosomal protein L34	GO:0006614 SRP-dependent cotranslational protein targeting to membrane;GO:0006613 cotranslational protein targeting to membrane;GO:0045047 protein targeting to ER		Ribosomal proteins; Predicted intracellular proteins	Cytosol;Endoplasmic reticulum;Nucleoli (Supported)			(M5926)HALLMARK MYC TARGETS V1	1.0	0.0	0.0	0.0	0.0	0.0	0.0	0.0	0.0	0.0	0.0	0.0	0.0	0.0	0.0	0.0	0.0	0.0	0.0	0.0
ENSDARG00000020976	553697	ensembl_gene_id	D. rerio	124402	H. sapiens	UBALD1	UBA like domain containing 1			Predicted intracellular proteins	Cytosol;Nucleoplasm (Approved); Additional: Cell Junctions				0.0	0.0	0.0	0.0	0.0	0.0	0.0	0.0	0.0	0.0	0.0	0.0	0.0	0.0	0.0	0.0	0.0	0.0	0.0	0.0
ENSDARG00000039346	541328	ensembl_gene_id	D. rerio	4698	H. sapiens	NDUFA5	NADH:ubiquinone oxidoreductase subunit A5	GO:0006120 mitochondrial electron transport, NADH to ubiquinone;GO:0010257 NADH dehydrogenase complex assembly;GO:0032981 mitochondrial respiratory chain complex I assembly		Predicted intracellular proteins		NADH		(M5905)HALLMARK ADIPOGENESIS; (M5936)HALLMARK OXIDATIVE PHOSPHORYLATION	0.0	1.0	0.0	0.0	0.0	0.0	0.0	1.0	0.0	0.0	0.0	0.0	0.0	0.0	0.0	0.0	0.0	0.0	0.0	0.0
ENSDARG00000070780	503864	ensembl_gene_id	D. rerio	117579	H. sapiens	RLN3	relaxin 3	GO:0007186 G protein-coupled receptor signaling pathway;GO:0007165 signal transduction;GO:0023052 signaling		Predicted secreted proteins					0.0	0.0	0.0	0.0	0.0	0.0	0.0	0.0	0.0	0.0	0.0	0.0	0.0	0.0	0.0	0.0	0.0	0.0	0.0	0.0
ENSDARG00000101465						None	None	None	None	None	None	None	None	None	nan	nan	nan	nan	nan	nan	nan	nan	nan	nan	nan	nan	nan	nan	nan	nan	nan	nan	nan	nan
ENSDARG00000039730	550419	ensembl_gene_id	D. rerio	440387	H. sapiens	CTRB2	chymotrypsinogen B2	GO:0009235 cobalamin metabolic process;GO:0033013 tetrapyrrole metabolic process;GO:0022617 extracellular matrix disassembly		ENZYME proteins:Hydrolases; Enzymes; Peptidases:Serine-type peptidases; Predicted secreted proteins; Predicted intracellular proteins					0.0	0.0	0.0	0.0	0.0	0.0	0.0	0.0	0.0	0.0	0.0	0.0	0.0	1.0	0.0	0.0	0.0	0.0	0.0	0.0
ENSDARG00000013044	393720	ensembl_gene_id	D. rerio	4729	H. sapiens	NDUFV2	NADH:ubiquinone oxidoreductase core subunit V2	GO:0006120 mitochondrial electron transport, NADH to ubiquinone;GO:0010257 NADH dehydrogenase complex assembly;GO:0032981 mitochondrial respiratory chain complex I assembly		Enzymes; ENZYME proteins:Oxidoreductases; Predicted intracellular proteins	Mitochondria (Supported); Additional: Cytosol;Nucleoplasm	NADH		(M5936)HALLMARK OXIDATIVE PHOSPHORYLATION	0.0	1.0	0.0	0.0	0.0	0.0	0.0	1.0	0.0	0.0	0.0	0.0	0.0	0.0	0.0	0.0	0.0	0.0	0.0	0.0
ENSDARG00000098957						None	None	None	None	None	None	None	None	None	nan	nan	nan	nan	nan	nan	nan	nan	nan	nan	nan	nan	nan	nan	nan	nan	nan	nan	nan	nan
ENSDARG00000016793	560055	ensembl_gene_id	D. rerio	1415	H. sapiens	CRYBB2	crystallin beta B2	GO:0002088 lens development in camera-type eye;GO:0007601 visual perception;GO:0050953 sensory perception of light stimulus		Disease related genes; Predicted intracellular proteins	Nucleoplasm (Approved)				0.0	0.0	0.0	0.0	0.0	0.0	0.0	0.0	0.0	0.0	0.0	0.0	0.0	0.0	0.0	0.0	0.0	0.0	0.0	0.0
ENSDARG00000053217	554103	ensembl_gene_id	D. rerio	1347	H. sapiens	COX7A2	cytochrome c oxidase subunit 7A2	GO:0097250 mitochondrial respiratory chain supercomplex assembly;GO:0002082 regulation of oxidative phosphorylation;GO:1903578 regulation of ATP metabolic process		Predicted intracellular proteins				(M5936)HALLMARK OXIDATIVE PHOSPHORYLATION	0.0	1.0	1.0	0.0	0.0	0.0	0.0	0.0	0.0	0.0	1.0	0.0	0.0	0.0	0.0	0.0	0.0	0.0	0.0	0.0
ENSDARG00000039578	368737	ensembl_gene_id	D. rerio	5036	H. sapiens	PA2G4	proliferation-associated 2G4	GO:0006364 rRNA processing;GO:0016072 rRNA metabolic process;GO:0042254 ribosome biogenesis		Enzymes; Peptidases:Metallopeptidases; Predicted intracellular proteins	Cytosol (Approved)		(M58)PID AR PATHWAY	(M5928)HALLMARK MYC TARGETS V2; (M5908)HALLMARK ANDROGEN RESPONSE; (M5925)HALLMARK E2F TARGETS	1.0	0.0	0.0	0.0	0.0	0.0	1.0	0.0	0.0	0.0	0.0	0.0	0.0	0.0	0.0	0.0	0.0	0.0	0.0	0.0
ENSDARG00000052073	57918	ensembl_gene_id	D. rerio	10904	H. sapiens	BLCAP	BLCAP apoptosis inducing factor	GO:0030262 apoptotic nuclear changes;GO:0006921 cellular component disassembly involved in execution phase of apoptosis;GO:0097194 execution phase of apoptosis		Predicted intracellular proteins	Nucleoli (Approved)			(M5939)HALLMARK P53 PATHWAY	0.0	0.0	0.0	0.0	0.0	0.0	0.0	0.0	0.0	0.0	0.0	0.0	0.0	1.0	0.0	0.0	0.0	0.0	0.0	0.0
ENSDARG00000019362	323490	ensembl_gene_id	D. rerio	5725	H. sapiens	PTBP1	polypyrimidine tract binding protein 1	GO:0075522 IRES-dependent viral translational initiation;GO:0070886 positive regulation of calcineurin-NFAT signaling cascade;GO:0106058 positive regulation of calcineurin-mediated signaling		Predicted intracellular proteins	Nucleoplasm (Supported)				1.0	0.0	0.0	0.0	0.0	0.0	0.0	0.0	0.0	0.0	0.0	0.0	0.0	0.0	0.0	0.0	0.0	0.0	0.0	0.0
ENSDARG00000003564	321732	ensembl_gene_id	D. rerio	83475	H. sapiens	DOHH	deoxyhypusine hydroxylase	GO:0008612 peptidyl-lysine modification to peptidyl-hypusine;GO:0018215 protein phosphopantetheinylation;GO:0018205 peptidyl-lysine modification		Enzymes; ENZYME proteins:Oxidoreductases; Predicted intracellular proteins	Cytosol (Approved); Additional: Nucleoli;Nucleoplasm				0.0	0.0	0.0	0.0	0.0	0.0	0.0	0.0	0.0	0.0	0.0	0.0	0.0	0.0	0.0	0.0	0.0	0.0	0.0	0.0
ENSDARG00000008748	406807	ensembl_gene_id	D. rerio	7334	H. sapiens	UBE2N	ubiquitin conjugating enzyme E2 N	GO:0033182 regulation of histone ubiquitination;GO:0000729 DNA double-strand break processing;GO:0051443 positive regulation of ubiquitin-protein transferase activity		Predicted intracellular proteins; ENZYME proteins:Transferases; Enzymes; Cancer-related genes:Candidate cancer biomarkers	Nucleoplasm (Supported); Additional: Nucleoli fibrillar center		(M84)PID ATM PATHWAY; (M110)PID IL1 PATHWAY	(M5923)HALLMARK PI3K AKT MTOR SIGNALING; (M5950)HALLMARK ALLOGRAFT REJECTION	0.0	0.0	0.0	0.0	0.0	0.0	0.0	0.0	1.0	1.0	0.0	0.0	0.0	0.0	0.0	0.0	1.0	0.0	0.0	0.0
ENSDARG00000105463						None	None	None	None	None	None	None	None	None	nan	nan	nan	nan	nan	nan	nan	nan	nan	nan	nan	nan	nan	nan	nan	nan	nan	nan	nan	nan
ENSDARG00000103163	406309	ensembl_gene_id	D. rerio			None	None	None	None	None	None	None	None	None	nan	nan	nan	nan	nan	nan	nan	nan	nan	nan	nan	nan	nan	nan	nan	nan	nan	nan	nan	nan
ENSDARG00000063899	140532	ensembl_gene_id	D. rerio	4536	H. sapiens	ND2	NADH dehydrogenase subunit 2	GO:0006120 mitochondrial electron transport, NADH to ubiquinone;GO:0010257 NADH dehydrogenase complex assembly;GO:0032981 mitochondrial respiratory chain complex I assembly		Potential drug targets; Disease related genes; ENZYME proteins:Oxidoreductases; Enzymes		NADH			0.0	1.0	0.0	0.0	0.0	0.0	0.0	0.0	0.0	0.0	0.0	0.0	0.0	0.0	0.0	0.0	0.0	0.0	0.0	0.0
ENSDARG00000009447	81541	ensembl_gene_id	D. rerio	517	H. sapiens	ATP5MC2	ATP synthase membrane subunit c locus 2	GO:0042776 mitochondrial ATP synthesis coupled proton transport;GO:0015985 energy coupled proton transport, down electrochemical gradient;GO:0015986 ATP synthesis coupled proton transport		Predicted intracellular proteins				(M5936)HALLMARK OXIDATIVE PHOSPHORYLATION	0.0	1.0	1.0	0.0	0.0	0.0	0.0	0.0	0.0	0.0	0.0	0.0	0.0	0.0	0.0	0.0	0.0	0.0	0.0	0.0
ENSDARG00000043865	282678	ensembl_gene_id	D. rerio	26520	H. sapiens	TIMM9	translocase of inner mitochondrial membrane 9	GO:0072321 chaperone-mediated protein transport;GO:0045039 protein import into mitochondrial inner membrane;GO:0090151 establishment of protein localization to mitochondrial membrane		Predicted intracellular proteins	Mitochondria (Supported)			(M5936)HALLMARK OXIDATIVE PHOSPHORYLATION	1.0	1.0	1.0	0.0	0.0	0.0	0.0	0.0	0.0	0.0	0.0	0.0	0.0	0.0	0.0	0.0	0.0	0.0	0.0	0.0
ENSDARG00000068507	114418	ensembl_gene_id	D. rerio	1414	H. sapiens	CRYBB1	crystallin beta B1	GO:0002088 lens development in camera-type eye;GO:0007601 visual perception;GO:0050953 sensory perception of light stimulus		Disease related genes; Predicted intracellular proteins					0.0	0.0	0.0	0.0	0.0	0.0	0.0	0.0	0.0	0.0	0.0	0.0	0.0	0.0	0.0	0.0	0.0	0.0	0.0	0.0
ENSDARG00000086912						None	None	None	None	None	None	None	None	None	nan	nan	nan	nan	nan	nan	nan	nan	nan	nan	nan	nan	nan	nan	nan	nan	nan	nan	nan	nan
ENSDARG00000038693	436670	ensembl_gene_id	D. rerio	2788	H. sapiens	GNG7	G protein subunit gamma 7	GO:0008277 regulation of G protein-coupled receptor signaling pathway;GO:0007186 G protein-coupled receptor signaling pathway;GO:0009966 regulation of signal transduction		RAS pathway related proteins; Predicted intracellular proteins					0.0	1.0	0.0	0.0	0.0	0.0	0.0	0.0	0.0	0.0	0.0	0.0	0.0	0.0	0.0	0.0	0.0	1.0	0.0	0.0
ENSDARG00000027236	445044	ensembl_gene_id	D. rerio	6247	H. sapiens	RS1	retinoschisin 1	GO:0016062 adaptation of rhodopsin mediated signaling;GO:0036367 light adaption;GO:0009642 response to light intensity		Disease related genes; Predicted secreted proteins					0.0	0.0	0.0	0.0	0.0	0.0	0.0	0.0	0.0	0.0	0.0	0.0	0.0	0.0	0.0	0.0	0.0	0.0	0.0	0.0
ENSDARG00000068820	252913	ensembl_gene_id	D. rerio	94239	H. sapiens	H2AZ2	H2A.Z variant histone 2	GO:0006342 chromatin silencing;GO:0045814 negative regulation of gene expression, epigenetic;GO:0006325 chromatin organization		Predicted intracellular proteins				(M5901)HALLMARK G2M CHECKPOINT	1.0	0.0	0.0	0.0	0.0	0.0	0.0	0.0	0.0	0.0	0.0	0.0	0.0	0.0	0.0	0.0	0.0	0.0	0.0	0.0
ENSDARG00000058734	541344	ensembl_gene_id	D. rerio	5052	H. sapiens	PRDX1	peroxiredoxin 1	GO:0019430 removal of superoxide radicals;GO:0071450 cellular response to oxygen radical;GO:0071451 cellular response to superoxide		Enzymes; ENZYME proteins:Oxidoreductases; Predicted intracellular proteins	Mitochondria (Approved)	Zinc; Copper; Artenimol; Zinc acetate; Zinc chloride; Zinc sulfate, unspecified form	(M58)PID AR PATHWAY	(M5938)HALLMARK REACTIVE OXYGEN SPECIES PATHWAY; (M5949)HALLMARK PEROXISOME; (M5924)HALLMARK MTORC1 SIGNALING	1.0	0.0	0.0	0.0	1.0	0.0	0.0	0.0	0.0	0.0	1.0	0.0	0.0	0.0	0.0	0.0	0.0	0.0	0.0	0.0
ENSDARG00000100630						None	None	None	None	None	None	None	None	None	nan	nan	nan	nan	nan	nan	nan	nan	nan	nan	nan	nan	nan	nan	nan	nan	nan	nan	nan	nan
ENSDARG00000011405	114420	ensembl_gene_id	D. rerio	6203	H. sapiens	RPS9	ribosomal protein S9	GO:0045903 positive regulation of translational fidelity;GO:0006450 regulation of translational fidelity;GO:0006614 SRP-dependent cotranslational protein targeting to membrane		Ribosomal proteins; Predicted intracellular proteins		Artenimol		(M5950)HALLMARK ALLOGRAFT REJECTION	1.0	0.0	0.0	0.0	0.0	0.0	1.0	0.0	0.0	0.0	0.0	0.0	0.0	0.0	0.0	0.0	0.0	0.0	0.0	0.0
ENSDARG00000034897	394121	ensembl_gene_id	D. rerio	100529239	H. sapiens	RPS10-NUDT3	RPS10-NUDT3 readthrough			Predicted intracellular proteins	Cytosol (Approved)				1.0	0.0	0.0	0.0	0.0	0.0	0.0	0.0	0.0	0.0	0.0	0.0	0.0	0.0	0.0	0.0	0.0	0.0	0.0	0.0
ENSDARG00000045808	402990	ensembl_gene_id	D. rerio	6017	H. sapiens	RLBP1	retinaldehyde binding protein 1	GO:0006776 vitamin A metabolic process;GO:0006775 fat-soluble vitamin metabolic process;GO:0001523 retinoid metabolic process		Disease related genes; Predicted intracellular proteins	Cytosol (Supported); Additional: Centrosome;Nucleoplasm				0.0	0.0	0.0	0.0	0.0	0.0	0.0	0.0	0.0	0.0	0.0	0.0	0.0	0.0	0.0	0.0	0.0	0.0	0.0	0.0
ENSDARG00000057460	436681	ensembl_gene_id	D. rerio			None	None	None	None	None	None	None	None	None	nan	nan	nan	nan	nan	nan	nan	nan	nan	nan	nan	nan	nan	nan	nan	nan	nan	nan	nan	nan
ENSDARG00000025850	394166	ensembl_gene_id	D. rerio	6227	H. sapiens	RPS21	ribosomal protein S21	GO:0000461 endonucleolytic cleavage to generate mature 3'-end of SSU-rRNA from (SSU-rRNA, 5.8S rRNA, LSU-rRNA);GO:0000447 endonucleolytic cleavage in ITS1 to separate SSU-rRNA from 5.8S rRNA and LSU-rRNA from tricistronic rRNA transcript (SSU-rRNA, 5.8S rRNA, LSU-rRNA);GO:0031125 rRNA 3'-end processing		Ribosomal proteins; Predicted intracellular proteins	Cytosol;Endoplasmic reticulum (Supported)				1.0	0.0	0.0	0.0	0.0	0.0	1.0	0.0	0.0	0.0	0.0	0.0	0.0	0.0	0.0	0.0	0.0	0.0	0.0	0.0
ENSDARG00000053858	541319	ensembl_gene_id	D. rerio	1396	H. sapiens	CRIP1	cysteine rich protein 1	GO:0060741 prostate gland stromal morphogenesis;GO:0071493 cellular response to UV-B;GO:0010224 response to UV-B		Predicted intracellular proteins	Cytosol;Nuclear speckles (Approved); Additional: Centrosome;Plasma membrane				0.0	0.0	0.0	0.0	1.0	0.0	0.0	0.0	0.0	0.0	0.0	0.0	0.0	0.0	0.0	0.0	0.0	0.0	0.0	0.0
ENSDARG00000007791	406685	ensembl_gene_id	D. rerio	5518	H. sapiens	PPP2R1A	protein phosphatase 2 scaffold subunit Aalpha	GO:0007084 mitotic nuclear envelope reassembly;GO:0042532 negative regulation of tyrosine phosphorylation of STAT protein;GO:0031468 nuclear envelope reassembly		Cancer-related genes:Mutational cancer driver genes; Disease related genes; Cancer-related genes:Mutated cancer genes; Predicted intracellular proteins	Cytosol (Approved)	2,6,8-Trimethyl-3-Amino-9-Benzyl-9-Methoxynonanoic Acid; (2S,3S,4E,6E,8S,9S)-3-amino-9-methoxy-2,6,8-trimethyl-10-phenyldeca-4,6-dienoic acid	(M210)PID IL8 CXCR2 PATHWAY; (M46)PID ATR PATHWAY; (M129)PID PLK1 PATHWAY		1.0	0.0	1.0	0.0	0.0	0.0	0.0	0.0	0.0	0.0	1.0	0.0	0.0	0.0	0.0	0.0	1.0	0.0	1.0	0.0
ENSDARG00000074552	796997	ensembl_gene_id	D. rerio	374291	H. sapiens	NDUFS7	NADH:ubiquinone oxidoreductase core subunit S7	GO:0015988 energy coupled proton transmembrane transport, against electrochemical gradient;GO:0015990 electron transport coupled proton transport;GO:0006120 mitochondrial electron transport, NADH to ubiquinone		ENZYME proteins:Oxidoreductases; Disease related genes; Enzymes; Potential drug targets; Predicted intracellular proteins		NADH		(M5936)HALLMARK OXIDATIVE PHOSPHORYLATION	0.0	1.0	1.0	0.0	0.0	0.0	0.0	1.0	0.0	0.0	1.0	0.0	0.0	0.0	0.0	0.0	0.0	0.0	0.0	0.0
ENSDARG00000098852	100000862	ensembl_gene_id	D. rerio			None	None	None	None	None	None	None	None	None	nan	nan	nan	nan	nan	nan	nan	nan	nan	nan	nan	nan	nan	nan	nan	nan	nan	nan	nan	nan
ENSDARG00000055589	541368	ensembl_gene_id	D. rerio			None	None	None	None	None	None	None	None	None	nan	nan	nan	nan	nan	nan	nan	nan	nan	nan	nan	nan	nan	nan	nan	nan	nan	nan	nan	nan
ENSDARG00000043334	335905	ensembl_gene_id	D. rerio	8030	H. sapiens	CCDC6	coiled-coil domain containing 6	GO:0007010 cytoskeleton organization;GO:0006996 organelle organization;GO:0016043 cellular component organization		Disease related genes; Cancer-related genes:Mutated cancer genes; Predicted intracellular proteins	Cytosol (Supported)				0.0	0.0	0.0	0.0	0.0	0.0	0.0	0.0	0.0	0.0	0.0	0.0	0.0	0.0	0.0	0.0	0.0	0.0	0.0	0.0
ENSDARG00000018757	562670	ensembl_gene_id	D. rerio	6667	H. sapiens	SP1	Sp1 transcription factor	GO:1904828 positive regulation of hydrogen sulfide biosynthetic process;GO:0051176 positive regulation of sulfur metabolic process;GO:1904826 regulation of hydrogen sulfide biosynthetic process		Transcription factors:Zinc-coordinating DNA-binding domains; Predicted intracellular proteins; Cancer-related genes:Candidate cancer biomarkers	Nucleoplasm (Enhanced)		(M234)PID IL2 STAT5 PATHWAY; (M44)PID HIF2PATHWAY; (M65)PID FRA PATHWAY	(M5939)HALLMARK P53 PATHWAY	1.0	1.0	0.0	1.0	1.0	0.0	1.0	0.0	0.0	0.0	0.0	0.0	0.0	0.0	0.0	0.0	0.0	0.0	1.0	1.0
ENSDARG00000104517	100333064	ensembl_gene_id	D. rerio			None	None	None	None	None	None	None	None	None	nan	nan	nan	nan	nan	nan	nan	nan	nan	nan	nan	nan	nan	nan	nan	nan	nan	nan	nan	nan
ENSDARG00000088383	554101	ensembl_gene_id	D. rerio	9377	H. sapiens	COX5A	cytochrome c oxidase subunit 5A	GO:0006123 mitochondrial electron transport, cytochrome c to oxygen;GO:0019646 aerobic electron transport chain;GO:0009060 aerobic respiration		Predicted intracellular proteins; Disease related genes; Transporters:Primary Active Transporters; Potential drug targets		Cholic Acid; N-Formylmethionine		(M5926)HALLMARK MYC TARGETS V1; (M5936)HALLMARK OXIDATIVE PHOSPHORYLATION	0.0	1.0	1.0	0.0	0.0	0.0	0.0	0.0	0.0	0.0	1.0	0.0	0.0	0.0	0.0	0.0	0.0	0.0	0.0	0.0
ENSDARG00000010113	393829	ensembl_gene_id	D. rerio	4714	H. sapiens	NDUFB8	NADH:ubiquinone oxidoreductase subunit B8	GO:0006120 mitochondrial electron transport, NADH to ubiquinone;GO:0010257 NADH dehydrogenase complex assembly;GO:0032981 mitochondrial respiratory chain complex I assembly			Mitochondria (Enhanced)	NADH		(M5936)HALLMARK OXIDATIVE PHOSPHORYLATION	0.0	1.0	0.0	0.0	0.0	0.0	0.0	1.0	0.0	0.0	0.0	0.0	0.0	0.0	0.0	0.0	0.0	0.0	0.0	0.0
ENSDARG00000077372	494478	ensembl_gene_id	D. rerio	7037	H. sapiens	TFRC	transferrin receptor	GO:0010637 negative regulation of mitochondrial fusion;GO:0010635 regulation of mitochondrial fusion;GO:0045780 positive regulation of bone resorption		CD markers; Peptidases:Metallopeptidases; Transporters; Disease related genes; Enzymes; Predicted secreted proteins; Cancer-related genes:Candidate cancer biomarkers; Potential drug targets; Predicted intracellular proteins	Endosomes;Lysosomes (Supported)	Iron; Ferrous sulfate anhydrous; Ferric cation; Ferrous gluconate; Ferrous succinate; Ferrous ascorbate; Ferrous fumarate; Ferrous glycine sulfate; Tetraferric tricitrate decahydrate; Ferric derisomaltose	(M106)PID HNF3B PATHWAY; (M255)PID HIF1 TFPATHWAY; (M66)PID MYC ACTIV PATHWAY	(M5941)HALLMARK UV RESPONSE UP; (M5924)HALLMARK MTORC1 SIGNALING; (M5925)HALLMARK E2F TARGETS	0.0	1.0	0.0	0.0	1.0	0.0	0.0	0.0	0.0	1.0	0.0	1.0	1.0	0.0	0.0	0.0	0.0	0.0	0.0	0.0
ENSDARG00000043802	100002785	ensembl_gene_id	D. rerio			None	None	None	None	None	None	None	None	None	nan	nan	nan	nan	nan	nan	nan	nan	nan	nan	nan	nan	nan	nan	nan	nan	nan	nan	nan	nan
ENSDARG00000097441						None	None	None	None	None	None	None	None	None	nan	nan	nan	nan	nan	nan	nan	nan	nan	nan	nan	nan	nan	nan	nan	nan	nan	nan	nan	nan
ENSDARG00000020893	406717	ensembl_gene_id	D. rerio	79751	H. sapiens	SLC25A22	solute carrier family 25 member 22	GO:0043490 malate-aspartate shuttle;GO:0015810 aspartate transmembrane transport;GO:0070778 L-aspartate transmembrane transport		Disease related genes; Transporters:Electrochemical Potential-driven transporters; Potential drug targets	Mitochondria (Uncertain); Additional: Nucleoplasm				0.0	1.0	1.0	0.0	0.0	0.0	0.0	0.0	0.0	0.0	0.0	0.0	0.0	0.0	0.0	0.0	0.0	0.0	0.0	0.0
ENSDARG00000062116	767676	ensembl_gene_id	D. rerio	10217	H. sapiens	CTDSPL	CTD small phosphatase like	GO:2000134 negative regulation of G1/S transition of mitotic cell cycle;GO:1902807 negative regulation of cell cycle G1/S phase transition;GO:2000045 regulation of G1/S transition of mitotic cell cycle		Enzymes; Predicted intracellular proteins; ENZYME proteins:Hydrolases	Vesicles (Approved); Additional: Nucleoplasm		(M228)PID SMAD2 3PATHWAY; (M181)PID BMP PATHWAY		0.0	0.0	0.0	0.0	0.0	0.0	0.0	0.0	0.0	0.0	0.0	0.0	0.0	0.0	0.0	0.0	0.0	0.0	0.0	0.0
ENSDARG00000042133	558617	ensembl_gene_id	D. rerio			None	None	None	None	None	None	None	None	None	nan	nan	nan	nan	nan	nan	nan	nan	nan	nan	nan	nan	nan	nan	nan	nan	nan	nan	nan	nan
ENSDARG00000013966	436862	ensembl_gene_id	D. rerio	5687	H. sapiens	PSMA6	proteasome 20S subunit alpha 6	GO:0010499 proteasomal ubiquitin-independent protein catabolic process;GO:0006521 regulation of cellular amino acid metabolic process;GO:1902036 regulation of hematopoietic stem cell differentiation		Predicted intracellular proteins; Enzymes; Peptidases:Threonine-type peptidases; ENZYME proteins:Hydrolases	Nucleoplasm (Supported)	(3AR,6R,6AS)-6-((S)-((S)-CYCLOHEX-2-ENYL)(HYDROXY)METHYL)-6A-METHYL-4-OXO-HEXAHYDRO-2H-FURO[3,2-C]PYRROLE-6-CARBALDEHYDE		(M5926)HALLMARK MYC TARGETS V1	1.0	0.0	0.0	0.0	0.0	0.0	0.0	0.0	1.0	0.0	0.0	0.0	0.0	0.0	0.0	0.0	0.0	0.0	1.0	1.0
ENSDARG00000036995	415167	ensembl_gene_id	D. rerio	11157	H. sapiens	LSM6	LSM6 homolog, U6 small nuclear RNA and mRNA degradation associated	GO:0043928 exonucleolytic nuclear-transcribed mRNA catabolic process involved in deadenylation-dependent decay;GO:0000291 nuclear-transcribed mRNA catabolic process, exonucleolytic;GO:0030490 maturation of SSU-rRNA		Predicted intracellular proteins	Actin filaments (Approved)	Uridine; Uridine monophosphate; Citric acid			1.0	0.0	0.0	0.0	0.0	0.0	1.0	0.0	0.0	0.0	0.0	0.0	0.0	0.0	0.0	0.0	0.0	0.0	0.0	0.0
ENSDARG00000055524	503534	ensembl_gene_id	D. rerio	9616	H. sapiens	RNF7	ring finger protein 7	GO:0051775 response to redox state;GO:0045116 protein neddylation;GO:0018215 protein phosphopantetheinylation		Predicted intracellular proteins	Nucleoplasm (Supported); Additional: Cytosol				0.0	0.0	0.0	0.0	0.0	0.0	0.0	0.0	1.0	0.0	0.0	0.0	0.0	0.0	0.0	0.0	0.0	0.0	0.0	0.0
ENSDARG00000076239	560941	ensembl_gene_id	D. rerio	54976	H. sapiens	C20orf27	chromosome 20 open reading frame 27	GO:0008150 biological_process		Predicted intracellular proteins	Cytosol;Nucleoplasm (Approved)				0.0	0.0	0.0	0.0	0.0	0.0	0.0	0.0	0.0	0.0	0.0	0.0	0.0	0.0	0.0	0.0	0.0	0.0	0.0	0.0
ENSDARG00000038185	407639	ensembl_gene_id	D. rerio	1444	H. sapiens	CSHL1	chorionic somatomammotropin hormone like 1	GO:0060396 growth hormone receptor signaling pathway;GO:0071378 cellular response to growth hormone stimulus;GO:0060416 response to growth hormone		Predicted secreted proteins; Predicted intracellular proteins			(M5883)NABA SECRETED FACTORS; (M5885)NABA MATRISOME ASSOCIATED; (M5889)NABA MATRISOME		0.0	0.0	0.0	0.0	0.0	1.0	0.0	0.0	0.0	0.0	0.0	0.0	0.0	0.0	0.0	0.0	0.0	0.0	0.0	0.0
ENSDARG00000100409	404622	ensembl_gene_id	D. rerio	819	H. sapiens	CAMLG	calcium modulating ligand	GO:0032435 negative regulation of proteasomal ubiquitin-dependent protein catabolic process;GO:2000059 negative regulation of ubiquitin-dependent protein catabolic process;GO:1901799 negative regulation of proteasomal protein catabolic process		Transporters:Primary Active Transporters; FDA approved drug targets:Small molecule drugs; Predicted intracellular proteins	Vesicles (Approved); Additional: Nucleoli;Nucleoplasm	Cyclosporine			0.0	0.0	0.0	0.0	0.0	1.0	0.0	0.0	1.0	1.0	0.0	0.0	0.0	0.0	1.0	0.0	0.0	0.0	0.0	0.0
ENSDARG00000059057	553767	ensembl_gene_id	D. rerio	155066	H. sapiens	ATP6V0E2	ATPase H+ transporting V0 subunit e2	GO:0007035 vacuolar acidification;GO:0090383 phagosome acidification;GO:0015682 ferric iron transport							1.0	1.0	1.0	0.0	0.0	1.0	0.0	0.0	0.0	0.0	0.0	1.0	0.0	0.0	0.0	0.0	0.0	0.0	0.0	0.0
ENSDARG00000039913	436757	ensembl_gene_id	D. rerio	10430	H. sapiens	TMEM147	transmembrane protein 147				Actin filaments;Golgi apparatus (Approved)				0.0	0.0	0.0	0.0	0.0	0.0	0.0	0.0	0.0	0.0	0.0	0.0	0.0	0.0	0.0	0.0	0.0	0.0	0.0	0.0
ENSDARG00000019702	369193	ensembl_gene_id	D. rerio	230	H. sapiens	ALDOC	aldolase, fructose-bisphosphate C	GO:0030388 fructose 1,6-bisphosphate metabolic process;GO:0006000 fructose metabolic process;GO:0006735 NADH regeneration		Enzymes; ENZYME proteins:Lyases; Cancer-related genes:Candidate cancer biomarkers; Candidate cardiovascular disease genes; Predicted intracellular proteins	Nucleoli fibrillar center;Nucleoplasm (Approved); Additional: Cytosol;Vesicles			(M5892)HALLMARK CHOLESTEROL HOMEOSTASIS; (M5891)HALLMARK HYPOXIA	1.0	1.0	1.0	0.0	0.0	0.0	0.0	0.0	0.0	0.0	0.0	0.0	0.0	0.0	0.0	0.0	0.0	0.0	0.0	1.0
ENSDARG00000054818	556556	ensembl_gene_id	D. rerio	6161	H. sapiens	RPL32	ribosomal protein L32	GO:0002181 cytoplasmic translation;GO:0006614 SRP-dependent cotranslational protein targeting to membrane;GO:0006613 cotranslational protein targeting to membrane		Ribosomal proteins; Predicted intracellular proteins	Cytosol;Endoplasmic reticulum (Approved)				1.0	0.0	0.0	0.0	0.0	0.0	0.0	0.0	0.0	0.0	0.0	0.0	0.0	0.0	0.0	0.0	0.0	0.0	0.0	0.0
ENSDARG00000038040	450054	ensembl_gene_id	D. rerio	27010	H. sapiens	TPK1	thiamin pyrophosphokinase 1	GO:0009229 thiamine diphosphate biosynthetic process;GO:0042357 thiamine diphosphate metabolic process;GO:0006772 thiamine metabolic process		Disease related genes; ENZYME proteins:Transferases; Enzymes; FDA approved drug targets:Small molecule drugs; Predicted intracellular proteins	Vesicles (Approved)	Thiamine; Pyrithiamine Pyrophosphate			0.0	0.0	1.0	0.0	0.0	0.0	0.0	0.0	0.0	0.0	0.0	0.0	0.0	0.0	0.0	0.0	0.0	0.0	0.0	0.0
ENSDARG00000053365	677758	ensembl_gene_id	D. rerio	6160	H. sapiens	RPL31	ribosomal protein L31	GO:0002181 cytoplasmic translation;GO:0006614 SRP-dependent cotranslational protein targeting to membrane;GO:0006613 cotranslational protein targeting to membrane		Ribosomal proteins; Predicted intracellular proteins					1.0	0.0	0.0	0.0	0.0	0.0	0.0	0.0	0.0	0.0	0.0	0.0	0.0	0.0	0.0	0.0	0.0	0.0	0.0	0.0
ENSDARG00000041974	415187	ensembl_gene_id	D. rerio	55845	H. sapiens	BRK1	BRICK1 subunit of SCAR/WAVE actin nucleating complex	GO:2000601 positive regulation of Arp2/3 complex-mediated actin nucleation;GO:0051127 positive regulation of actin nucleation;GO:0034315 regulation of Arp2/3 complex-mediated actin nucleation		Predicted intracellular proteins	Nuclear speckles (Approved); Additional: Cell Junctions		(M278)PID RAC1 PATHWAY; (M164)PID ERBB1 DOWNSTREAM PATHWAY; (M186)PID PDGFRB PATHWAY		0.0	0.0	0.0	0.0	0.0	0.0	0.0	0.0	0.0	0.0	0.0	0.0	0.0	0.0	0.0	0.0	0.0	0.0	1.0	0.0
ENSDARG00000019404	335709	ensembl_gene_id	D. rerio	513	H. sapiens	ATP5F1D	ATP synthase F1 subunit delta	GO:0033615 mitochondrial proton-transporting ATP synthase complex assembly;GO:0043461 proton-transporting ATP synthase complex assembly;GO:0070071 proton-transporting two-sector ATPase complex assembly		Predicted intracellular proteins		Isoflurane; Desflurane		(M5936)HALLMARK OXIDATIVE PHOSPHORYLATION	0.0	1.0	1.0	0.0	1.0	0.0	0.0	0.0	0.0	0.0	1.0	0.0	0.0	0.0	0.0	0.0	0.0	0.0	0.0	0.0
ENSDARG00000029057	791179	ensembl_gene_id	D. rerio	53345	H. sapiens	TM6SF2	transmembrane 6 superfamily member 2	GO:0055088 lipid homeostasis;GO:0019216 regulation of lipid metabolic process;GO:0048878 chemical homeostasis							0.0	0.0	0.0	0.0	0.0	0.0	0.0	0.0	0.0	0.0	0.0	0.0	0.0	0.0	0.0	0.0	0.0	0.0	0.0	1.0
ENSDARG00000007682	338304	ensembl_gene_id	D. rerio	79144	H. sapiens	PPDPF	pancreatic progenitor cell differentiation and proliferation factor	GO:0030154 cell differentiation;GO:0048869 cellular developmental process;GO:0007275 multicellular organism development		Predicted intracellular proteins	Microtubules;Nucleoplasm (Approved); Additional: Nucleoli				0.0	0.0	0.0	0.0	0.0	0.0	0.0	0.0	0.0	0.0	0.0	0.0	0.0	0.0	0.0	0.0	0.0	0.0	0.0	0.0
ENSDARG00000051783	58101	ensembl_gene_id	D. rerio	6175	H. sapiens	RPLP0	ribosomal protein lateral stalk subunit P0	GO:0000027 ribosomal large subunit assembly;GO:0071353 cellular response to interleukin-4;GO:0070670 response to interleukin-4		Ribosomal proteins; Predicted intracellular proteins	Cytosol;Endoplasmic reticulum (Supported)			(M5926)HALLMARK MYC TARGETS V1	1.0	0.0	0.0	0.0	0.0	0.0	1.0	0.0	0.0	0.0	0.0	0.0	0.0	0.0	0.0	0.0	0.0	0.0	0.0	0.0
ENSDARG00000056744	403061	ensembl_gene_id	D. rerio	63036	H. sapiens	CELA2A	chymotrypsin like elastase 2A	GO:1901143 insulin catabolic process;GO:1901142 insulin metabolic process;GO:0090330 regulation of platelet aggregation		Peptidases:Serine-type peptidases; Enzymes; Predicted secreted proteins; ENZYME proteins:Hydrolases		2-(2-HYDROXY-CYCLOPENTYL)-PENT-4-ENAL	(M3468)NABA ECM REGULATORS; (M5885)NABA MATRISOME ASSOCIATED; (M5889)NABA MATRISOME		0.0	0.0	0.0	0.0	0.0	0.0	0.0	0.0	0.0	0.0	0.0	0.0	0.0	0.0	0.0	0.0	0.0	0.0	0.0	0.0
ENSDARG00000053559	569864	ensembl_gene_id	D. rerio	10099	H. sapiens	TSPAN3	tetraspanin 3	GO:0008150 biological_process		Transporters:Accessory Factors Involved in Transport; Predicted intracellular proteins	Golgi apparatus;Nucleoplasm (Approved)				0.0	0.0	0.0	0.0	0.0	0.0	0.0	0.0	0.0	0.0	0.0	0.0	0.0	0.0	0.0	0.0	0.0	0.0	0.0	0.0
ENSDARG00000091609	100331208	ensembl_gene_id	D. rerio	27290	H. sapiens	SPINK4	serine peptidase inhibitor Kazal type 4	GO:0010951 negative regulation of endopeptidase activity;GO:0010466 negative regulation of peptidase activity;GO:0045861 negative regulation of proteolysis		Predicted secreted proteins; Predicted intracellular proteins	Golgi apparatus;Vesicles (Approved); Additional: Nucleoplasm				0.0	0.0	0.0	0.0	0.0	0.0	0.0	0.0	0.0	0.0	0.0	0.0	0.0	0.0	0.0	0.0	0.0	0.0	0.0	0.0
ENSDARG00000029230	402940	ensembl_gene_id	D. rerio	4860	H. sapiens	PNP	purine nucleoside phosphorylase	GO:0006148 inosine catabolic process;GO:0006738 nicotinamide riboside catabolic process;GO:0046495 nicotinamide riboside metabolic process		Disease related genes; ENZYME proteins:Transferases; Enzymes; FDA approved drug targets:Small molecule drugs; Predicted intracellular proteins	Cytosol (Supported)	Cladribine; Didanosine; 8-azaguanine; 2,6-Diamino-(S)-9-[2-(Phosphonomethoxy)Propyl]Purine; Immucillin-G; Guanine; 2-Amino-7-[2-(2-Hydroxy-1-Hydroxymethyl-Ethylamino)-Ethyl]-1,7-Dihydro-Purin-6-One; Peldesine; 9-deazainosine; Guanosine; Ribose-1-Phosphate; (3R,4R)-3-Hydroxy-4-(hydroxymethyl)-1-[(4-oxo-4,4a,5,7a-tetrahydro-3H-pyrrolo[3,2-d]pyrimidin-7-yl)methyl]pyrrolidinium; 3'-deoxyguanosine; (2…		(M5898)HALLMARK DNA REPAIR; (M5947)HALLMARK IL2 STAT5 SIGNALING; (M5913)HALLMARK INTERFERON GAMMA RESPONSE	1.0	1.0	1.0	1.0	0.0	0.0	0.0	0.0	0.0	0.0	0.0	0.0	0.0	0.0	0.0	0.0	0.0	0.0	0.0	0.0
ENSDARG00000095147	321502	ensembl_gene_id	D. rerio	3872	H. sapiens	KRT17	keratin 17	GO:0051798 positive regulation of hair follicle development;GO:0042635 positive regulation of hair cycle;GO:0051797 regulation of hair follicle development		Predicted intracellular proteins; Disease related genes; Cancer-related genes:Candidate cancer biomarkers	Intermediate filaments (Enhanced)		(M115)PID REG GR PATHWAY	(M5939)HALLMARK P53 PATHWAY	1.0	0.0	0.0	0.0	0.0	0.0	0.0	0.0	0.0	0.0	0.0	0.0	0.0	0.0	0.0	0.0	0.0	0.0	0.0	0.0
ENSDARG00000057936	30465	ensembl_gene_id	D. rerio	64211	H. sapiens	LHX5	LIM homeobox 5	GO:0021937 cerebellar Purkinje cell-granule cell precursor cell signaling involved in regulation of granule cell precursor cell proliferation;GO:0021940 positive regulation of cerebellar granule cell precursor proliferation;GO:0021702 cerebellar Purkinje cell differentiation		Transcription factors:Helix-turn-helix domains; Predicted intracellular proteins	Cytosol (Approved); Additional: Nuclear bodies;Nucleoplasm				0.0	0.0	0.0	0.0	0.0	0.0	0.0	0.0	0.0	0.0	0.0	0.0	0.0	0.0	0.0	0.0	0.0	0.0	0.0	0.0
ENSDARG00000097902	100148757	ensembl_gene_id	D. rerio			None	None	None	None	None	None	None	None	None	nan	nan	nan	nan	nan	nan	nan	nan	nan	nan	nan	nan	nan	nan	nan	nan	nan	nan	nan	nan
ENSDARG00000088091	799355	ensembl_gene_id	D. rerio	5216	H. sapiens	PFN1	profilin 1	GO:1900029 positive regulation of ruffle assembly;GO:1900027 regulation of ruffle assembly;GO:0051497 negative regulation of stress fiber assembly		Disease related genes; Predicted intracellular proteins	Cytosol (Approved)	7-HYDROXY-4-METHYL-3-(2-HYDROXY-ETHYL)COUMARIN; Artenimol	(M16801)SIG REGULATION OF THE ACTIN CYTOSKELETON BY RHO GTPASES; (M8873)ST FAS SIGNALING PATHWAY	(M5923)HALLMARK PI3K AKT MTOR SIGNALING; (M5915)HALLMARK APICAL JUNCTION; (M5921)HALLMARK COMPLEMENT	1.0	0.0	0.0	1.0	0.0	0.0	0.0	0.0	0.0	0.0	0.0	0.0	1.0	0.0	1.0	0.0	0.0	0.0	1.0	0.0
ENSDARG00000042566	393725	ensembl_gene_id	D. rerio	6201	H. sapiens	RPS7	ribosomal protein S7	GO:1902255 positive regulation of intrinsic apoptotic signaling pathway by p53 class mediator;GO:1904667 negative regulation of ubiquitin protein ligase activity;GO:0051444 negative regulation of ubiquitin-protein transferase activity		Disease related genes; Ribosomal proteins; Predicted intracellular proteins	Cytosol;Endoplasmic reticulum (Approved)				1.0	0.0	0.0	0.0	0.0	1.0	1.0	0.0	1.0	1.0	0.0	0.0	0.0	0.0	1.0	0.0	0.0	0.0	0.0	0.0
ENSDARG00000025326	337084	ensembl_gene_id	D. rerio	103910	H. sapiens	MYL12B	myosin light chain 12B	GO:0006936 muscle contraction;GO:0003012 muscle system process;GO:0003008 system process		Predicted intracellular proteins	Nucleoli fibrillar center;Nucleoplasm (Approved)			(M5915)HALLMARK APICAL JUNCTION	1.0	0.0	0.0	0.0	0.0	0.0	0.0	0.0	0.0	0.0	0.0	0.0	0.0	0.0	0.0	0.0	0.0	0.0	1.0	0.0
ENSDARG00000036834	550522	ensembl_gene_id	D. rerio	3872	H. sapiens	KRT17	keratin 17	GO:0051798 positive regulation of hair follicle development;GO:0042635 positive regulation of hair cycle;GO:0051797 regulation of hair follicle development		Predicted intracellular proteins; Disease related genes; Cancer-related genes:Candidate cancer biomarkers	Intermediate filaments (Enhanced)		(M115)PID REG GR PATHWAY	(M5939)HALLMARK P53 PATHWAY	1.0	0.0	0.0	0.0	0.0	0.0	0.0	0.0	0.0	0.0	0.0	0.0	0.0	0.0	0.0	0.0	0.0	0.0	0.0	0.0
ENSDARG00000009978	336655	ensembl_gene_id	D. rerio	6275	H. sapiens	S100A4	S100 calcium binding protein A4	GO:0001837 epithelial to mesenchymal transition;GO:0043123 positive regulation of I-kappaB kinase/NF-kappaB signaling;GO:0048762 mesenchymal cell differentiation		Predicted intracellular proteins; Cancer-related genes:Candidate cancer biomarkers	Plasma membrane (Enhanced)	Trifluoperazine; Copper	(M5883)NABA SECRETED FACTORS; (M5885)NABA MATRISOME ASSOCIATED; (M5889)NABA MATRISOME	(M5944)HALLMARK ANGIOGENESIS; (M5891)HALLMARK HYPOXIA; (M5939)HALLMARK P53 PATHWAY	0.0	0.0	0.0	0.0	0.0	0.0	0.0	0.0	0.0	1.0	0.0	0.0	0.0	0.0	0.0	0.0	0.0	0.0	0.0	0.0
ENSDARG00000013979	324047	ensembl_gene_id	D. rerio	80762	H. sapiens	NDFIP1	Nedd4 family interacting protein 1	GO:0048294 negative regulation of isotype switching to IgE isotypes;GO:0045829 negative regulation of isotype switching;GO:0048289 isotype switching to IgE isotypes							0.0	0.0	0.0	0.0	0.0	0.0	0.0	0.0	1.0	1.0	0.0	1.0	0.0	0.0	0.0	0.0	0.0	0.0	0.0	0.0
ENSDARG00000035557	326974	ensembl_gene_id	D. rerio	11337	H. sapiens	GABARAP	GABA type A receptor-associated protein	GO:0006995 cellular response to nitrogen starvation;GO:0043562 cellular response to nitrogen levels;GO:0097352 autophagosome maturation		Transporters:Transporter channels and pores; Predicted intracellular proteins	Vesicles (Approved)				1.0	1.0	0.0	0.0	0.0	1.0	0.0	0.0	0.0	0.0	0.0	0.0	0.0	1.0	0.0	1.0	0.0	0.0	0.0	0.0
ENSDARG00000091148	100000175	ensembl_gene_id	D. rerio	1415	H. sapiens	CRYBB2	crystallin beta B2	GO:0002088 lens development in camera-type eye;GO:0007601 visual perception;GO:0050953 sensory perception of light stimulus		Disease related genes; Predicted intracellular proteins	Nucleoplasm (Approved)				0.0	0.0	0.0	0.0	0.0	0.0	0.0	0.0	0.0	0.0	0.0	0.0	0.0	0.0	0.0	0.0	0.0	0.0	0.0	0.0
ENSDARG00000026829	336381	ensembl_gene_id	D. rerio	23406	H. sapiens	COTL1	coactosin like F-actin binding protein 1	GO:0050832 defense response to fungus;GO:0009620 response to fungus;GO:0030833 regulation of actin filament polymerization		Predicted intracellular proteins	Cytosol (Supported)				0.0	0.0	0.0	0.0	0.0	0.0	0.0	0.0	0.0	0.0	0.0	0.0	0.0	0.0	0.0	0.0	0.0	0.0	0.0	0.0
ENSDARG00000002217	791709	ensembl_gene_id	D. rerio	60592	H. sapiens	SCOC	short coiled-coil protein	GO:0061635 regulation of protein complex stability;GO:0016239 positive regulation of macroautophagy;GO:0010508 positive regulation of autophagy		Predicted intracellular proteins	Golgi apparatus;Nucleoplasm (Approved)				0.0	0.0	0.0	0.0	0.0	1.0	0.0	0.0	1.0	0.0	0.0	0.0	0.0	0.0	0.0	0.0	0.0	0.0	0.0	0.0
ENSDARG00000089963						None	None	None	None	None	None	None	None	None	nan	nan	nan	nan	nan	nan	nan	nan	nan	nan	nan	nan	nan	nan	nan	nan	nan	nan	nan	nan
ENSDARG00000045359	436713	ensembl_gene_id	D. rerio	6921	H. sapiens	ELOC	elongin C	GO:0061418 regulation of transcription from RNA polymerase II promoter in response to hypoxia;GO:0006368 transcription elongation from RNA polymerase II promoter;GO:0043618 regulation of transcription from RNA polymerase II promoter in response to stress		Predicted intracellular proteins	Vesicles (Approved); Additional: Cell Junctions;Nucleoli		(M180)PID HIF1A PATHWAY; (M44)PID HIF2PATHWAY		1.0	0.0	0.0	1.0	0.0	0.0	0.0	0.0	1.0	0.0	1.0	0.0	0.0	0.0	0.0	0.0	0.0	0.0	0.0	0.0
ENSDARG00000041223	100000855	ensembl_gene_id	D. rerio	65990	H. sapiens	ANTKMT	adenine nucleotide translocase lysine methyltransferase	GO:1905271 regulation of proton-transporting ATP synthase activity, rotational mechanism;GO:1905273 positive regulation of proton-transporting ATP synthase activity, rotational mechanism;GO:1905706 regulation of mitochondrial ATP synthesis coupled proton transport		Predicted intracellular proteins	Cytosol (Approved)				0.0	1.0	1.0	0.0	0.0	0.0	0.0	0.0	0.0	0.0	0.0	0.0	0.0	0.0	0.0	0.0	0.0	0.0	0.0	0.0
ENSDARG00000052905	100101646	ensembl_gene_id	D. rerio	83886	H. sapiens	PRSS27	serine protease 27	GO:0006508 proteolysis;GO:0019538 protein metabolic process;GO:1901564 organonitrogen compound metabolic process		Peptidases:Serine-type peptidases; Enzymes; Predicted secreted proteins	Vesicles (Approved)				0.0	0.0	0.0	0.0	0.0	0.0	0.0	0.0	0.0	0.0	0.0	0.0	0.0	0.0	0.0	0.0	0.0	0.0	0.0	0.0
ENSDARG00000015385	550451	ensembl_gene_id	D. rerio	4722	H. sapiens	NDUFS3	NADH:ubiquinone oxidoreductase core subunit S3	GO:0021762 substantia nigra development;GO:0006120 mitochondrial electron transport, NADH to ubiquinone;GO:0048857 neural nucleus development		Enzymes; ENZYME proteins:Oxidoreductases; Predicted intracellular proteins	Mitochondria (Supported); Additional: Nuclear bodies	NADH		(M5905)HALLMARK ADIPOGENESIS; (M5936)HALLMARK OXIDATIVE PHOSPHORYLATION	0.0	1.0	0.0	0.0	0.0	0.0	0.0	1.0	0.0	0.0	0.0	0.0	0.0	0.0	0.0	0.0	0.0	0.0	0.0	0.0
ENSDARG00000059304	393740	ensembl_gene_id	D. rerio	51142	H. sapiens	CHCHD2	coiled-coil-helix-coiled-coil-helix domain containing 2	GO:1905448 positive regulation of mitochondrial ATP synthesis coupled electron transport;GO:1903862 positive regulation of oxidative phosphorylation;GO:1905446 regulation of mitochondrial ATP synthesis coupled electron transport		Disease related genes; Predicted intracellular proteins	Mitochondria (Enhanced)				0.0	1.0	0.0	0.0	1.0	0.0	0.0	0.0	0.0	0.0	0.0	0.0	0.0	0.0	0.0	0.0	1.0	0.0	0.0	0.0
ENSDARG00000104042	492760	ensembl_gene_id	D. rerio	83394	H. sapiens	PITPNM3	PITPNM family member 3	GO:0006661 phosphatidylinositol biosynthetic process;GO:0046488 phosphatidylinositol metabolic process;GO:0046474 glycerophospholipid biosynthetic process		Disease related genes; Predicted intracellular proteins	Plasma membrane (Approved)				0.0	0.0	1.0	0.0	0.0	0.0	0.0	0.0	0.0	0.0	0.0	0.0	0.0	0.0	0.0	0.0	0.0	0.0	0.0	0.0
ENSDARG00000022213	327057	ensembl_gene_id	D. rerio	7371	H. sapiens	UCK2	uridine-cytidine kinase 2	GO:0044211 CTP salvage;GO:0010138 pyrimidine ribonucleotide salvage;GO:0032262 pyrimidine nucleotide salvage		ENZYME proteins:Transferases; Enzymes; Predicted intracellular proteins	Nucleoplasm (Approved)	Cytidine; Cytidine-5'-Triphosphate; Cytidine-5'-Monophosphate; Uridine 5'-triphosphate		(M5947)HALLMARK IL2 STAT5 SIGNALING; (M5901)HALLMARK G2M CHECKPOINT	0.0	1.0	1.0	0.0	0.0	0.0	0.0	0.0	0.0	0.0	0.0	0.0	0.0	0.0	0.0	0.0	0.0	0.0	0.0	0.0
ENSDARG00000069422	100003787	ensembl_gene_id	D. rerio	55651	H. sapiens	NHP2	NHP2 ribonucleoprotein	GO:0031120 snRNA pseudouridine synthesis;GO:0040031 snRNA modification;GO:0031118 rRNA pseudouridine synthesis		Disease related genes; Ribosomal proteins; Predicted intracellular proteins	Nucleoplasm (Supported); Additional: Cytosol			(M5922)HALLMARK UNFOLDED PROTEIN RESPONSE; (M5926)HALLMARK MYC TARGETS V1	1.0	0.0	0.0	0.0	0.0	0.0	1.0	0.0	0.0	0.0	0.0	0.0	0.0	0.0	0.0	0.0	0.0	0.0	0.0	0.0
ENSDARG00000105747						None	None	None	None	None	None	None	None	None	nan	nan	nan	nan	nan	nan	nan	nan	nan	nan	nan	nan	nan	nan	nan	nan	nan	nan	nan	nan
ENSDARG00000007276	554107	ensembl_gene_id	D. rerio	63036	H. sapiens	CELA2A	chymotrypsin like elastase 2A	GO:1901143 insulin catabolic process;GO:1901142 insulin metabolic process;GO:0090330 regulation of platelet aggregation		Peptidases:Serine-type peptidases; Enzymes; Predicted secreted proteins; ENZYME proteins:Hydrolases		2-(2-HYDROXY-CYCLOPENTYL)-PENT-4-ENAL	(M3468)NABA ECM REGULATORS; (M5885)NABA MATRISOME ASSOCIATED; (M5889)NABA MATRISOME		0.0	0.0	0.0	0.0	0.0	0.0	0.0	0.0	0.0	0.0	0.0	0.0	0.0	0.0	0.0	0.0	0.0	0.0	0.0	0.0
ENSDARG00000088745	100126122	ensembl_gene_id	D. rerio	4239	H. sapiens	MFAP4	microfibril associated protein 4	GO:0071493 cellular response to UV-B;GO:0048251 elastic fiber assembly;GO:0001867 complement activation, lectin pathway		Predicted secreted proteins	Endoplasmic reticulum (Approved)		(M3008)NABA ECM GLYCOPROTEINS; (M5884)NABA CORE MATRISOME; (M5889)NABA MATRISOME		0.0	0.0	0.0	0.0	0.0	0.0	0.0	0.0	0.0	0.0	0.0	0.0	0.0	0.0	0.0	0.0	0.0	0.0	0.0	0.0
ENSDARG00000094833	751633	ensembl_gene_id	D. rerio	493753	H. sapiens	COA5	cytochrome c oxidase assembly factor 5	GO:0033617 mitochondrial respiratory chain complex IV assembly;GO:0008535 respiratory chain complex IV assembly;GO:0017004 cytochrome complex assembly		Disease related genes; Predicted intracellular proteins	Mitochondria (Supported)				0.0	1.0	0.0	0.0	0.0	0.0	0.0	0.0	0.0	0.0	0.0	0.0	0.0	0.0	0.0	0.0	0.0	0.0	0.0	0.0
ENSDARG00000090428	322451	ensembl_gene_id	D. rerio	440387	H. sapiens	CTRB2	chymotrypsinogen B2	GO:0009235 cobalamin metabolic process;GO:0033013 tetrapyrrole metabolic process;GO:0022617 extracellular matrix disassembly		ENZYME proteins:Hydrolases; Enzymes; Peptidases:Serine-type peptidases; Predicted secreted proteins; Predicted intracellular proteins					0.0	0.0	0.0	0.0	0.0	0.0	0.0	0.0	0.0	0.0	0.0	0.0	0.0	1.0	0.0	0.0	0.0	0.0	0.0	0.0
ENSDARG00000017617	445327	ensembl_gene_id	D. rerio	29929	H. sapiens	ALG6	ALG6 alpha-1,3-glucosyltransferase	GO:0006488 dolichol-linked oligosaccharide biosynthetic process;GO:0006490 oligosaccharide-lipid intermediate biosynthetic process;GO:0006487 protein N-linked glycosylation		Disease related genes; Enzymes; Potential drug targets; ENZYME proteins:Transferases	Endoplasmic reticulum (Approved)				0.0	0.0	1.0	0.0	0.0	0.0	0.0	0.0	0.0	0.0	0.0	0.0	0.0	0.0	0.0	0.0	0.0	0.0	0.0	0.0
ENSDARG00000059400	445304	ensembl_gene_id	D. rerio	56900	H. sapiens	TMEM167B	transmembrane protein 167B	GO:0045054 constitutive secretory pathway;GO:0006887 exocytosis;GO:0032940 secretion by cell							0.0	0.0	0.0	0.0	0.0	0.0	0.0	0.0	0.0	0.0	0.0	0.0	0.0	0.0	0.0	0.0	0.0	0.0	0.0	0.0
ENSDARG00000095556	795545	ensembl_gene_id	D. rerio			None	None	None	None	None	None	None	None	None	nan	nan	nan	nan	nan	nan	nan	nan	nan	nan	nan	nan	nan	nan	nan	nan	nan	nan	nan	nan
ENSDARG00000036875	337007	ensembl_gene_id	D. rerio	6206	H. sapiens	RPS12	ribosomal protein S12	GO:0006614 SRP-dependent cotranslational protein targeting to membrane;GO:0006613 cotranslational protein targeting to membrane;GO:0045047 protein targeting to ER		Ribosomal proteins; Predicted intracellular proteins	Cytosol (Supported); Additional: Golgi apparatus;Vesicles			(M5939)HALLMARK P53 PATHWAY	1.0	0.0	0.0	0.0	0.0	0.0	0.0	0.0	0.0	0.0	0.0	0.0	0.0	0.0	0.0	0.0	0.0	0.0	0.0	0.0
ENSDARG00000097157	559783	ensembl_gene_id	D. rerio			None	None	None	None	None	None	None	None	None	nan	nan	nan	nan	nan	nan	nan	nan	nan	nan	nan	nan	nan	nan	nan	nan	nan	nan	nan	nan
ENSDARG00000073750	415232	ensembl_gene_id	D. rerio	1415	H. sapiens	CRYBB2	crystallin beta B2	GO:0002088 lens development in camera-type eye;GO:0007601 visual perception;GO:0050953 sensory perception of light stimulus		Disease related genes; Predicted intracellular proteins	Nucleoplasm (Approved)				0.0	0.0	0.0	0.0	0.0	0.0	0.0	0.0	0.0	0.0	0.0	0.0	0.0	0.0	0.0	0.0	0.0	0.0	0.0	0.0
ENSDARG00000006260	393154	ensembl_gene_id	D. rerio	7277	H. sapiens	TUBA4A	tubulin alpha 4a	GO:0097711 ciliary basal body-plasma membrane docking;GO:0002576 platelet degranulation;GO:0140056 organelle localization by membrane tethering		Disease related genes; FDA approved drug targets:Small molecule drugs; Predicted intracellular proteins	Microtubules (Enhanced)	Vincristine; Podofilox; Epothilone D; Patupilone; CYT997; Cabazitaxel; Phenethyl Isothiocyanate		(M5941)HALLMARK UV RESPONSE UP; (M5893)HALLMARK MITOTIC SPINDLE; (M5924)HALLMARK MTORC1 SIGNALING	1.0	0.0	1.0	0.0	0.0	0.0	0.0	0.0	0.0	0.0	0.0	0.0	0.0	0.0	0.0	0.0	0.0	1.0	0.0	0.0
ENSDARG00000087456						None	None	None	None	None	None	None	None	None	nan	nan	nan	nan	nan	nan	nan	nan	nan	nan	nan	nan	nan	nan	nan	nan	nan	nan	nan	nan
ENSDARG00000087324	553710	ensembl_gene_id	D. rerio	1415	H. sapiens	CRYBB2	crystallin beta B2	GO:0002088 lens development in camera-type eye;GO:0007601 visual perception;GO:0050953 sensory perception of light stimulus		Disease related genes; Predicted intracellular proteins	Nucleoplasm (Approved)				0.0	0.0	0.0	0.0	0.0	0.0	0.0	0.0	0.0	0.0	0.0	0.0	0.0	0.0	0.0	0.0	0.0	0.0	0.0	0.0
ENSDARG00000035899	447837	ensembl_gene_id	D. rerio	120892	H. sapiens	LRRK2	leucine rich repeat kinase 2	GO:1903123 regulation of thioredoxin peroxidase activity;GO:1903124 negative regulation of thioredoxin peroxidase activity;GO:1903125 negative regulation of thioredoxin peroxidase activity by peptidyl-threonine phosphorylation	TKL Ser/Thr protein kinase family	Kinases:TKL Ser/Thr protein kinases; Cancer-related genes:Mutational cancer driver genes; Disease related genes; ENZYME proteins:Transferases; Enzymes; Potential drug targets; Predicted intracellular proteins	Vesicles (Supported)	Fostamatinib			1.0	1.0	1.0	0.0	1.0	1.0	0.0	0.0	1.0	1.0	0.0	1.0	1.0	0.0	1.0	1.0	1.0	0.0	0.0	0.0
ENSDARG00000070867	57924	ensembl_gene_id	D. rerio	57819	H. sapiens	LSM2	LSM2 homolog, U6 small nuclear RNA and mRNA degradation associated	GO:0000244 spliceosomal tri-snRNP complex assembly;GO:0043928 exonucleolytic nuclear-transcribed mRNA catabolic process involved in deadenylation-dependent decay;GO:0000291 nuclear-transcribed mRNA catabolic process, exonucleolytic		Predicted intracellular proteins	Nucleoplasm (Enhanced)			(M5926)HALLMARK MYC TARGETS V1	1.0	0.0	0.0	0.0	0.0	0.0	1.0	0.0	0.0	0.0	0.0	0.0	0.0	0.0	0.0	0.0	0.0	0.0	0.0	0.0
ENSDARG00000098735						None	None	None	None	None	None	None	None	None	nan	nan	nan	nan	nan	nan	nan	nan	nan	nan	nan	nan	nan	nan	nan	nan	nan	nan	nan	nan
ENSDARG00000033447	437006	ensembl_gene_id	D. rerio	30010	H. sapiens	NXPH1	neurexophilin 1			Predicted secreted proteins; Predicted intracellular proteins					0.0	0.0	0.0	0.0	0.0	0.0	0.0	0.0	0.0	0.0	0.0	0.0	0.0	0.0	0.0	0.0	0.0	0.0	0.0	0.0
ENSDARG00000094191	436892	ensembl_gene_id	D. rerio	79023	H. sapiens	NUP37	nucleoporin 37	GO:0006409 tRNA export from nucleus;GO:0071431 tRNA-containing ribonucleoprotein complex export from nucleus;GO:0051031 tRNA transport		Transporters:Transporter channels and pores; Predicted intracellular proteins	Nucleoplasm (Approved)				1.0	1.0	1.0	0.0	0.0	0.0	0.0	0.0	0.0	0.0	0.0	0.0	0.0	0.0	0.0	0.0	1.0	0.0	0.0	1.0
ENSDARG00000097706	101885944	ensembl_gene_id	D. rerio			None	None	None	None	None	None	None	None	None	nan	nan	nan	nan	nan	nan	nan	nan	nan	nan	nan	nan	nan	nan	nan	nan	nan	nan	nan	nan
ENSDARG00000022165	431762	ensembl_gene_id	D. rerio	4257	H. sapiens	MGST1	microsomal glutathione S-transferase 1	GO:0071449 cellular response to lipid hydroperoxide;GO:0006982 response to lipid hydroperoxide;GO:0071447 cellular response to hydroperoxide		ENZYME proteins:Transferases; Enzymes; Predicted intracellular proteins	Mitochondria (Approved); Additional: Endoplasmic reticulum	Glutathione; Glutathione disulfide		(M5938)HALLMARK REACTIVE OXYGEN SPECIES PATHWAY	0.0	0.0	0.0	0.0	1.0	0.0	0.0	0.0	0.0	0.0	0.0	0.0	0.0	0.0	0.0	0.0	0.0	0.0	0.0	0.0
ENSDARG00000042660	431750	ensembl_gene_id	D. rerio	26017	H. sapiens	FAM32A	family with sequence similarity 32 member A	GO:0007049 cell cycle;GO:0006915 apoptotic process;GO:0012501 programmed cell death		Predicted intracellular proteins	Nucleoli;Nucleoplasm (Supported)				0.0	0.0	0.0	0.0	0.0	0.0	0.0	0.0	0.0	0.0	0.0	0.0	0.0	0.0	0.0	0.0	0.0	0.0	0.0	0.0
ENSDARG00000057882	415204	ensembl_gene_id	D. rerio	10094	H. sapiens	ARPC3	actin related protein 2/3 complex subunit 3	GO:0070358 actin polymerization-dependent cell motility;GO:0034314 Arp2/3 complex-mediated actin nucleation;GO:1990090 cellular response to nerve growth factor stimulus		Predicted intracellular proteins	Nucleoplasm (Uncertain)	N-[2-(2-methyl-1H-indol-3-yl)ethyl]thiophene-2-carboxamide; (2S)-2-(3-bromophenyl)-3-(5-chloro-2-hydroxyphenyl)-1,3-thiazolidin-4-one	(M278)PID RAC1 PATHWAY; (M81)PID CDC42 PATHWAY; (M164)PID ERBB1 DOWNSTREAM PATHWAY	(M5923)HALLMARK PI3K AKT MTOR SIGNALING	1.0	0.0	0.0	0.0	0.0	0.0	0.0	0.0	0.0	0.0	0.0	0.0	0.0	0.0	0.0	0.0	0.0	0.0	1.0	0.0
ENSDARG00000074340	100333424	ensembl_gene_id	D. rerio	8293	H. sapiens	SERF1A	small EDRK-rich factor 1A	GO:1990000 amyloid fibril formation;GO:0031648 protein destabilization;GO:0031647 regulation of protein stability		Predicted intracellular proteins	Nuclear bodies (Uncertain)				0.0	0.0	0.0	0.0	0.0	0.0	0.0	0.0	0.0	0.0	0.0	0.0	0.0	0.0	1.0	0.0	0.0	0.0	0.0	0.0
ENSDARG00000035129	449555	ensembl_gene_id	D. rerio	10202	H. sapiens	DHRS2	dehydrogenase/reductase 2	GO:0043011 myeloid dendritic cell differentiation;GO:0001773 myeloid dendritic cell activation;GO:0008207 C21-steroid hormone metabolic process		Predicted intracellular proteins	Mitochondria (Supported); Additional: Nucleoplasm			(M5906)HALLMARK ESTROGEN RESPONSE EARLY; (M5907)HALLMARK ESTROGEN RESPONSE LATE	0.0	0.0	0.0	0.0	1.0	0.0	0.0	0.0	0.0	0.0	0.0	0.0	0.0	0.0	0.0	0.0	0.0	0.0	0.0	0.0
ENSDARG00000013475	393555	ensembl_gene_id	D. rerio	10575	H. sapiens	CCT4	chaperonin containing TCP1 subunit 4	GO:0090666 scaRNA localization to Cajal body;GO:1904851 positive regulation of establishment of protein localization to telomere;GO:0070203 regulation of establishment of protein localization to telomere		Predicted intracellular proteins	Cytosol (Supported); Additional: Nucleoplasm			(M5926)HALLMARK MYC TARGETS V1	1.0	0.0	1.0	0.0	0.0	0.0	0.0	0.0	0.0	0.0	0.0	0.0	0.0	0.0	1.0	0.0	1.0	0.0	0.0	0.0
ENSDARG00000014907	565082	ensembl_gene_id	D. rerio	5654	H. sapiens	HTRA1	HtrA serine peptidase 1	GO:0060718 chorionic trophoblast cell differentiation;GO:0060717 chorion development;GO:0097187 dentinogenesis		Disease related genes; Enzymes; Peptidases:Serine-type peptidases; Predicted secreted proteins; Potential drug targets; Predicted intracellular proteins	Plasma membrane (Supported)		(M3468)NABA ECM REGULATORS; (M5885)NABA MATRISOME ASSOCIATED; (M5889)NABA MATRISOME	(M5946)HALLMARK COAGULATION; (M5930)HALLMARK EPITHELIAL MESENCHYMAL TRANSITION	0.0	0.0	0.0	1.0	0.0	0.0	0.0	0.0	0.0	0.0	0.0	0.0	0.0	1.0	0.0	0.0	0.0	0.0	0.0	0.0
ENSDARG00000018146	352926	ensembl_gene_id	D. rerio	2876	H. sapiens	GPX1	glutathione peroxidase 1	GO:0009608 response to symbiont;GO:0009609 response to symbiotic bacterium;GO:0010269 response to selenium ion				Glutathione; Cannabidiol; Medical Cannabis; Nabiximols	(M145)PID P53 DOWNSTREAM PATHWAY	(M5902)HALLMARK APOPTOSIS	1.0	1.0	0.0	1.0	1.0	0.0	0.0	0.0	1.0	0.0	0.0	0.0	1.0	0.0	0.0	0.0	1.0	0.0	0.0	1.0
ENSDARG00000039887	334619	ensembl_gene_id	D. rerio	708	H. sapiens	C1QBP	complement C1q binding protein	GO:0039534 negative regulation of MDA-5 signaling pathway;GO:0042256 mature ribosome assembly;GO:1901165 positive regulation of trophoblast cell migration		Transporters; Disease related genes; Potential drug targets; Cancer-related genes:Candidate cancer biomarkers; Predicted intracellular proteins	Plasma membrane (Approved); Additional: Mitochondria	Hyaluronic acid; Copper		(M5926)HALLMARK MYC TARGETS V1	1.0	0.0	0.0	1.0	0.0	0.0	1.0	0.0	0.0	0.0	0.0	0.0	0.0	0.0	0.0	0.0	0.0	0.0	0.0	0.0
ENSDARG00000058105	195819	ensembl_gene_id	D. rerio	6173	H. sapiens	RPL36A	ribosomal protein L36a	GO:0002181 cytoplasmic translation;GO:0006614 SRP-dependent cotranslational protein targeting to membrane;GO:0006613 cotranslational protein targeting to membrane		Ribosomal proteins; Predicted intracellular proteins	Cytosol;Endoplasmic reticulum (Supported); Additional: Plasma membrane				1.0	0.0	0.0	0.0	0.0	0.0	0.0	0.0	0.0	0.0	0.0	0.0	0.0	0.0	0.0	0.0	0.0	0.0	0.0	0.0
ENSDARG00000068680	447843	ensembl_gene_id	D. rerio	1506	H. sapiens	CTRL	chymotrypsin like	GO:0030163 protein catabolic process;GO:1901565 organonitrogen compound catabolic process;GO:0009057 macromolecule catabolic process		Peptidases:Serine-type peptidases; Enzymes; Predicted secreted proteins					0.0	0.0	0.0	0.0	0.0	0.0	0.0	0.0	0.0	0.0	0.0	0.0	0.0	0.0	0.0	0.0	0.0	0.0	0.0	0.0
ENSDARG00000069827	100126132	ensembl_gene_id	D. rerio	1415	H. sapiens	CRYBB2	crystallin beta B2	GO:0002088 lens development in camera-type eye;GO:0007601 visual perception;GO:0050953 sensory perception of light stimulus		Disease related genes; Predicted intracellular proteins	Nucleoplasm (Approved)				0.0	0.0	0.0	0.0	0.0	0.0	0.0	0.0	0.0	0.0	0.0	0.0	0.0	0.0	0.0	0.0	0.0	0.0	0.0	0.0
ENSDARG00000056141	550442	ensembl_gene_id	D. rerio	80219	H. sapiens	COQ10B	coenzyme Q10B	GO:0006744 ubiquinone biosynthetic process;GO:1901663 quinone biosynthetic process;GO:0006743 ubiquinone metabolic process		Predicted intracellular proteins	Cytosol (Approved)				0.0	1.0	0.0	0.0	0.0	0.0	0.0	0.0	0.0	0.0	0.0	0.0	0.0	0.0	0.0	0.0	0.0	0.0	0.0	0.0
ENSDARG00000042667	117508	ensembl_gene_id	D. rerio	10365	H. sapiens	KLF2	Kruppel like factor 2	GO:0097532 stress response to acid chemical;GO:0097533 cellular stress response to acid chemical;GO:0046898 response to cycloheximide		Transcription factors:Zinc-coordinating DNA-binding domains; Predicted intracellular proteins	Nucleoplasm (Approved)			(M5890)HALLMARK TNFA SIGNALING VIA NFKB	0.0	0.0	0.0	0.0	1.0	0.0	0.0	0.0	0.0	0.0	0.0	0.0	0.0	0.0	0.0	0.0	0.0	0.0	0.0	0.0
ENSDARG00000075034	797613	ensembl_gene_id	D. rerio	55225	H. sapiens	RAVER2	ribonucleoprotein, PTB binding 2	GO:0000377 RNA splicing, via transesterification reactions with bulged adenosine as nucleophile;GO:0000398 mRNA splicing, via spliceosome;GO:0000375 RNA splicing, via transesterification reactions		Predicted intracellular proteins	Nucleoplasm (Approved)				0.0	0.0	0.0	0.0	0.0	0.0	0.0	0.0	0.0	0.0	0.0	0.0	0.0	0.0	0.0	0.0	0.0	0.0	0.0	0.0
ENSDARG00000103576	555957	ensembl_gene_id	D. rerio	2049	H. sapiens	EPHB3	EPH receptor B3	GO:0022038 corpus callosum development;GO:0031290 retinal ganglion cell axon guidance;GO:0007413 axonal fasciculation	Tyr protein kinase family	ENZYME proteins:Transferases; Kinases:Tyr protein kinases; Enzymes; Cancer-related genes:Candidate cancer biomarkers			(M62)PID EPHB FWD PATHWAY	(M5909)HALLMARK MYOGENESIS	1.0	0.0	0.0	0.0	0.0	0.0	0.0	0.0	0.0	0.0	0.0	0.0	0.0	0.0	0.0	0.0	1.0	0.0	0.0	0.0
ENSDARG00000041619	30722	ensembl_gene_id	D. rerio	10399	H. sapiens	RACK1	receptor for activated C kinase 1	GO:0042998 positive regulation of Golgi to plasma membrane protein transport;GO:0072344 rescue of stalled ribosome;GO:0051343 positive regulation of cyclic-nucleotide phosphodiesterase activity		Ribosomal proteins; Predicted intracellular proteins	Cytosol;Nucleoplasm (Supported)	Copper	(M180)PID HIF1A PATHWAY; (M125)PID IGF1 PATHWAY; (M240)PID SYNDECAN 2 PATHWAY	(M5926)HALLMARK MYC TARGETS V1; (M5939)HALLMARK P53 PATHWAY	1.0	0.0	0.0	1.0	1.0	0.0	0.0	0.0	1.0	0.0	0.0	0.0	1.0	1.0	0.0	1.0	1.0	0.0	0.0	1.0
ENSDARG00000103007	336550	ensembl_gene_id	D. rerio	6188	H. sapiens	RPS3	ribosomal protein S3	GO:0061481 response to TNF agonist;GO:1902546 positive regulation of DNA N-glycosylase activity;GO:2001272 positive regulation of cysteine-type endopeptidase activity involved in execution phase of apoptosis		Ribosomal proteins; Enzymes; ENZYME proteins:Lyases; Cancer-related genes:Candidate cancer biomarkers; Predicted intracellular proteins	Cytosol;Endoplasmic reticulum (Supported)			(M5926)HALLMARK MYC TARGETS V1	1.0	0.0	0.0	0.0	1.0	0.0	0.0	0.0	0.0	1.0	0.0	0.0	0.0	0.0	0.0	0.0	1.0	0.0	0.0	0.0
ENSDARG00000011648	192331	ensembl_gene_id	D. rerio	6632	H. sapiens	SNRPD1	small nuclear ribonucleoprotein D1 polypeptide	GO:0000387 spliceosomal snRNP assembly;GO:0000245 spliceosomal complex assembly;GO:0051170 import into nucleus		Predicted intracellular proteins				(M5901)HALLMARK G2M CHECKPOINT; (M5926)HALLMARK MYC TARGETS V1	1.0	0.0	0.0	0.0	0.0	0.0	1.0	0.0	0.0	0.0	0.0	0.0	0.0	0.0	0.0	0.0	0.0	0.0	0.0	0.0
ENSDARG00000098486	336876	ensembl_gene_id	D. rerio	54472	H. sapiens	TOLLIP	toll interacting protein	GO:0033235 positive regulation of protein sumoylation;GO:0036010 protein localization to endosome;GO:0033233 regulation of protein sumoylation		Predicted intracellular proteins	Cytosol;Plasma membrane (Approved)		(M110)PID IL1 PATHWAY		0.0	0.0	0.0	0.0	0.0	1.0	0.0	0.0	1.0	1.0	0.0	0.0	0.0	0.0	0.0	0.0	0.0	0.0	0.0	0.0
ENSDARG00000099663	326962	ensembl_gene_id	D. rerio			None	None	None	None	None	None	None	None	None	nan	nan	nan	nan	nan	nan	nan	nan	nan	nan	nan	nan	nan	nan	nan	nan	nan	nan	nan	nan
ENSDARG00000018328	436718	ensembl_gene_id	D. rerio	389	H. sapiens	RHOC	ras homolog family member C	GO:1902766 skeletal muscle satellite cell migration;GO:0044319 wound healing, spreading of cells;GO:0090505 epiboly involved in wound healing		Predicted intracellular proteins; Cancer-related genes:Candidate cancer biomarkers			(M11)PID PRL SIGNALING EVENTS PATHWAY; (M153)PID P75 NTR PATHWAY; (M124)PID CXCR4 PATHWAY		1.0	0.0	0.0	1.0	0.0	0.0	0.0	0.0	0.0	1.0	0.0	0.0	0.0	0.0	0.0	0.0	0.0	0.0	0.0	0.0
ENSDARG00000002593	558311	ensembl_gene_id	D. rerio	51151	H. sapiens	SLC45A2	solute carrier family 45 member 2	GO:0015766 disaccharide transport;GO:0015770 sucrose transport;GO:0015772 oligosaccharide transport		Disease related genes; Transporters:Electrochemical Potential-driven transporters; Potential drug targets					1.0	0.0	0.0	0.0	0.0	0.0	0.0	0.0	0.0	0.0	0.0	0.0	0.0	0.0	0.0	0.0	0.0	0.0	0.0	0.0
ENSDARG00000101526	797793	ensembl_gene_id	D. rerio			None	None	None	None	None	None	None	None	None	nan	nan	nan	nan	nan	nan	nan	nan	nan	nan	nan	nan	nan	nan	nan	nan	nan	nan	nan	nan
ENSDARG00000025566	322362	ensembl_gene_id	D. rerio	5250	H. sapiens	SLC25A3	solute carrier family 25 member 3	GO:0035435 phosphate ion transmembrane transport;GO:0006817 phosphate ion transport;GO:0098661 inorganic anion transmembrane transport		Predicted intracellular proteins; Disease related genes; Transporters:Electrochemical Potential-driven transporters; Potential drug targets	Mitochondria (Supported)		(M195)PID CMYB PATHWAY	(M5926)HALLMARK MYC TARGETS V1; (M5936)HALLMARK OXIDATIVE PHOSPHORYLATION	0.0	0.0	1.0	0.0	0.0	0.0	0.0	0.0	0.0	0.0	0.0	0.0	0.0	0.0	0.0	0.0	0.0	0.0	0.0	0.0
ENSDARG00000021891	393602	ensembl_gene_id	D. rerio	51043	H. sapiens	ZBTB7B	zinc finger and BTB domain containing 7B	GO:0051141 negative regulation of NK T cell proliferation;GO:0043377 negative regulation of CD8-positive, alpha-beta T cell differentiation;GO:0051134 negative regulation of NK T cell activation		Transcription factors:Zinc-coordinating DNA-binding domains; Predicted intracellular proteins	Nucleoplasm (Enhanced)				0.0	0.0	0.0	0.0	0.0	0.0	0.0	0.0	0.0	0.0	0.0	0.0	0.0	0.0	0.0	0.0	1.0	0.0	0.0	0.0
ENSDARG00000102643	393535	ensembl_gene_id	D. rerio	5119	H. sapiens	CHMP1A	charged multivesicular body protein 1A	GO:1904896 ESCRT complex disassembly;GO:1904903 ESCRT III complex disassembly;GO:0007076 mitotic chromosome condensation		Disease related genes; Predicted intracellular proteins				(M5901)HALLMARK G2M CHECKPOINT	0.0	0.0	0.0	0.0	0.0	0.0	0.0	0.0	0.0	0.0	0.0	0.0	0.0	1.0	0.0	0.0	0.0	0.0	0.0	0.0
ENSDARG00000034734	415174	ensembl_gene_id	D. rerio	10001	H. sapiens	MED6	mediator complex subunit 6	GO:0006367 transcription initiation from RNA polymerase II promoter;GO:0006352 DNA-templated transcription, initiation;GO:0045944 positive regulation of transcription by RNA polymerase II		Predicted intracellular proteins	Nucleoplasm (Enhanced)				0.0	0.0	0.0	0.0	0.0	0.0	0.0	0.0	0.0	0.0	0.0	0.0	0.0	0.0	0.0	0.0	0.0	0.0	0.0	0.0
ENSDARG00000017235	406464	ensembl_gene_id	D. rerio	143244	H. sapiens	EIF5AL1	eukaryotic translation initiation factor 5A like 1	GO:0045905 positive regulation of translational termination;GO:0045901 positive regulation of translational elongation;GO:0006449 regulation of translational termination		Transporters:Transporter channels and pores; Predicted intracellular proteins					1.0	0.0	0.0	0.0	0.0	0.0	0.0	0.0	0.0	0.0	0.0	0.0	0.0	1.0	0.0	0.0	0.0	0.0	0.0	0.0
ENSDARG00000007989	368667	ensembl_gene_id	D. rerio	4738	H. sapiens	NEDD8	NEDD8 ubiquitin like modifier	GO:0045116 protein neddylation;GO:0006879 cellular iron ion homeostasis;GO:0055072 iron ion homeostasis		Predicted intracellular proteins; Cancer-related genes:Candidate cancer biomarkers	Nucleoplasm (Enhanced); Additional: Cytosol		(M119)PID ERB GENOMIC PATHWAY; (M261)PID P53 REGULATION PATHWAY; (M200)PID ERA GENOMIC PATHWAY		0.0	0.0	0.0	0.0	0.0	0.0	0.0	0.0	1.0	0.0	0.0	1.0	0.0	0.0	0.0	0.0	0.0	0.0	0.0	0.0
ENSDARG00000028017	568021	ensembl_gene_id	D. rerio	94241	H. sapiens	TP53INP1	tumor protein p53 inducible nuclear protein 1	GO:0072702 response to methyl methanesulfonate;GO:0072703 cellular response to methyl methanesulfonate;GO:1904761 negative regulation of myofibroblast differentiation		Predicted intracellular proteins	Cytosol (Supported)		(M145)PID P53 DOWNSTREAM PATHWAY	(M5892)HALLMARK CHOLESTEROL HOMEOSTASIS	0.0	0.0	0.0	0.0	1.0	1.0	0.0	0.0	1.0	0.0	1.0	0.0	0.0	0.0	0.0	0.0	0.0	0.0	0.0	0.0
ENSDARG00000021257	336498	ensembl_gene_id	D. rerio	8664	H. sapiens	EIF3D	eukaryotic translation initiation factor 3 subunit D	GO:0002191 cap-dependent translational initiation;GO:0075525 viral translational termination-reinitiation;GO:1902416 positive regulation of mRNA binding		Disease related genes; Predicted intracellular proteins	Cytosol (Supported)			(M5926)HALLMARK MYC TARGETS V1; (M5950)HALLMARK ALLOGRAFT REJECTION	1.0	0.0	0.0	1.0	0.0	0.0	1.0	0.0	0.0	0.0	0.0	0.0	0.0	0.0	0.0	0.0	0.0	0.0	0.0	0.0
ENSDARG00000017843	393565	ensembl_gene_id	D. rerio			None	None	None	None	None	None	None	None	None	nan	nan	nan	nan	nan	nan	nan	nan	nan	nan	nan	nan	nan	nan	nan	nan	nan	nan	nan	nan
ENSDARG00000035880	449655	ensembl_gene_id	D. rerio	528	H. sapiens	ATP6V1C1	ATPase H+ transporting V1 subunit C1	GO:0090383 phagosome acidification;GO:0015682 ferric iron transport;GO:0033572 transferrin transport		Transporters:Primary Active Transporters; FDA approved drug targets:Small molecule drugs; Predicted intracellular proteins	Nucleoplasm (Supported); Additional: Cytosol	D-tartaric acid; Thonzonium		(M5941)HALLMARK UV RESPONSE UP; (M5936)HALLMARK OXIDATIVE PHOSPHORYLATION	1.0	1.0	1.0	0.0	0.0	1.0	0.0	0.0	0.0	0.0	0.0	1.0	0.0	0.0	0.0	0.0	0.0	0.0	0.0	0.0
ENSDARG00000070873	795788	ensembl_gene_id	D. rerio	6366	H. sapiens	CCL21	C-C motif chemokine ligand 21	GO:2000527 regulation of myeloid dendritic cell chemotaxis;GO:2000529 positive regulation of myeloid dendritic cell chemotaxis;GO:2000548 negative regulation of dendritic cell dendrite assembly		Predicted secreted proteins; Cancer-related genes:Candidate cancer biomarkers			(M5883)NABA SECRETED FACTORS; (M5885)NABA MATRISOME ASSOCIATED; (M5889)NABA MATRISOME		0.0	0.0	1.0	1.0	0.0	0.0	0.0	0.0	0.0	1.0	0.0	1.0	1.0	0.0	0.0	0.0	1.0	0.0	0.0	1.0
ENSDARG00000086842	58094	ensembl_gene_id	D. rerio			None	None	None	None	None	None	None	None	None	nan	nan	nan	nan	nan	nan	nan	nan	nan	nan	nan	nan	nan	nan	nan	nan	nan	nan	nan	nan
ENSDARG00000021984	554125	ensembl_gene_id	D. rerio	4695	H. sapiens	NDUFA2	NADH:ubiquinone oxidoreductase subunit A2	GO:0001835 blastocyst hatching;GO:0035188 hatching;GO:0071684 organism emergence from protective structure		Predicted intracellular proteins		NADH		(M5936)HALLMARK OXIDATIVE PHOSPHORYLATION	0.0	1.0	0.0	0.0	0.0	0.0	0.0	1.0	0.0	0.0	0.0	0.0	0.0	0.0	0.0	0.0	0.0	0.0	0.0	0.0
ENSDARG00000034146	569432	ensembl_gene_id	D. rerio	8812	H. sapiens	CCNK	cyclin K	GO:0071619 phosphorylation of RNA polymerase II C-terminal domain serine 2 residues;GO:1901409 positive regulation of phosphorylation of RNA polymerase II C-terminal domain;GO:2001163 regulation of phosphorylation of RNA polymerase II C-terminal domain serine 2 residues		Predicted intracellular proteins	Nucleoplasm (Enhanced)		(M145)PID P53 DOWNSTREAM PATHWAY	(M5939)HALLMARK P53 PATHWAY	0.0	0.0	0.0	0.0	0.0	0.0	1.0	0.0	0.0	0.0	1.0	0.0	0.0	0.0	0.0	0.0	1.0	0.0	0.0	0.0
ENSDARG00000028336	406433	ensembl_gene_id	D. rerio	27294	H. sapiens	DHDH	dihydrodiol dehydrogenase	GO:0042843 D-xylose catabolic process;GO:0042732 D-xylose metabolic process;GO:0019323 pentose catabolic process		Enzymes; ENZYME proteins:Oxidoreductases; Predicted intracellular proteins	Actin filaments;Nucleoplasm (Approved)				0.0	1.0	0.0	0.0	0.0	0.0	0.0	0.0	0.0	0.0	0.0	0.0	0.0	0.0	0.0	0.0	0.0	0.0	0.0	0.0
ENSDARG00000012113	286778	ensembl_gene_id	D. rerio	54955	H. sapiens	C1orf109	chromosome 1 open reading frame 109			Predicted intracellular proteins	Cytosol (Supported); Additional: Nucleoli;Nucleoplasm				0.0	0.0	0.0	0.0	0.0	0.0	0.0	0.0	0.0	0.0	0.0	0.0	0.0	0.0	0.0	0.0	0.0	0.0	0.0	0.0
ENSDARG00000076572	566558	ensembl_gene_id	D. rerio	1415	H. sapiens	CRYBB2	crystallin beta B2	GO:0002088 lens development in camera-type eye;GO:0007601 visual perception;GO:0050953 sensory perception of light stimulus		Disease related genes; Predicted intracellular proteins	Nucleoplasm (Approved)				0.0	0.0	0.0	0.0	0.0	0.0	0.0	0.0	0.0	0.0	0.0	0.0	0.0	0.0	0.0	0.0	0.0	0.0	0.0	0.0
ENSDARG00000043279	436844	ensembl_gene_id	D. rerio	375318	H. sapiens	AQP12A	aquaporin 12A	GO:0055085 transmembrane transport;GO:0006810 transport;GO:0051234 establishment of localization		Transporters:Transporter channels and pores					0.0	0.0	0.0	0.0	0.0	0.0	0.0	0.0	0.0	0.0	0.0	0.0	0.0	0.0	0.0	0.0	0.0	0.0	0.0	0.0
ENSDARG00000052746	394183	ensembl_gene_id	D. rerio	2907	H. sapiens	GRINA	glutamate ionotropic receptor NMDA type subunit associated protein 1	GO:1902236 negative regulation of endoplasmic reticulum stress-induced intrinsic apoptotic signaling pathway;GO:0032469 endoplasmic reticulum calcium ion homeostasis;GO:1902235 regulation of endoplasmic reticulum stress-induced intrinsic apoptotic signaling pathway		Predicted intracellular proteins	Nucleoli fibrillar center (Approved); Additional: Cytosol			(M5941)HALLMARK UV RESPONSE UP	0.0	0.0	0.0	0.0	0.0	0.0	0.0	0.0	0.0	0.0	0.0	1.0	0.0	0.0	0.0	0.0	1.0	0.0	0.0	0.0
ENSDARG00000096849	100536712	ensembl_gene_id	D. rerio			None	None	None	None	None	None	None	None	None	nan	nan	nan	nan	nan	nan	nan	nan	nan	nan	nan	nan	nan	nan	nan	nan	nan	nan	nan	nan
ENSDARG00000103919	556254	ensembl_gene_id	D. rerio			None	None	None	None	None	None	None	None	None	nan	nan	nan	nan	nan	nan	nan	nan	nan	nan	nan	nan	nan	nan	nan	nan	nan	nan	nan	nan
ENSDARG00000032102	373079	ensembl_gene_id	D. rerio	10935	H. sapiens	PRDX3	peroxiredoxin 3	GO:0018171 peptidyl-cysteine oxidation;GO:0018158 protein oxidation;GO:0001893 maternal placenta development		Enzymes; ENZYME proteins:Oxidoreductases; Predicted intracellular proteins	Mitochondria (Supported)		(M66)PID MYC ACTIV PATHWAY	(M5905)HALLMARK ADIPOGENESIS; (M5926)HALLMARK MYC TARGETS V1; (M5936)HALLMARK OXIDATIVE PHOSPHORYLATION	1.0	1.0	0.0	0.0	1.0	0.0	0.0	0.0	0.0	0.0	0.0	0.0	0.0	0.0	0.0	1.0	0.0	0.0	0.0	0.0
ENSDARG00000076693						None	None	None	None	None	None	None	None	None	nan	nan	nan	nan	nan	nan	nan	nan	nan	nan	nan	nan	nan	nan	nan	nan	nan	nan	nan	nan
ENSDARG00000070480	335616	ensembl_gene_id	D. rerio	10551	H. sapiens	AGR2	anterior gradient 2, protein disulphide isomerase family member	GO:1903899 positive regulation of PERK-mediated unfolded protein response;GO:1903896 positive regulation of IRE1-mediated unfolded protein response;GO:0070254 mucus secretion		Predicted intracellular proteins	Endoplasmic reticulum (Supported)			(M5907)HALLMARK ESTROGEN RESPONSE LATE	1.0	0.0	0.0	0.0	0.0	0.0	0.0	0.0	0.0	0.0	0.0	0.0	0.0	0.0	0.0	0.0	1.0	0.0	0.0	0.0
ENSDARG00000045355	447935	ensembl_gene_id	D. rerio	6921	H. sapiens	ELOC	elongin C	GO:0061418 regulation of transcription from RNA polymerase II promoter in response to hypoxia;GO:0006368 transcription elongation from RNA polymerase II promoter;GO:0043618 regulation of transcription from RNA polymerase II promoter in response to stress		Predicted intracellular proteins	Vesicles (Approved); Additional: Cell Junctions;Nucleoli		(M180)PID HIF1A PATHWAY; (M44)PID HIF2PATHWAY		1.0	0.0	0.0	1.0	0.0	0.0	0.0	0.0	1.0	0.0	1.0	0.0	0.0	0.0	0.0	0.0	0.0	0.0	0.0	0.0
ENSDARG00000013333	321951	ensembl_gene_id	D. rerio	4705	H. sapiens	NDUFA10	NADH:ubiquinone oxidoreductase subunit A10	GO:0006120 mitochondrial electron transport, NADH to ubiquinone;GO:0010257 NADH dehydrogenase complex assembly;GO:0032981 mitochondrial respiratory chain complex I assembly		Disease related genes; Predicted intracellular proteins	Mitochondria (Supported)	NADH			0.0	1.0	0.0	0.0	0.0	0.0	0.0	1.0	0.0	0.0	0.0	0.0	0.0	0.0	0.0	0.0	0.0	0.0	0.0	0.0
ENSDARG00000102121						None	None	None	None	None	None	None	None	None	nan	nan	nan	nan	nan	nan	nan	nan	nan	nan	nan	nan	nan	nan	nan	nan	nan	nan	nan	nan
ENSDARG00000036298	415169	ensembl_gene_id	D. rerio	6207	H. sapiens	RPS13	ribosomal protein S13	GO:0033119 negative regulation of RNA splicing;GO:0006614 SRP-dependent cotranslational protein targeting to membrane;GO:0006613 cotranslational protein targeting to membrane		Ribosomal proteins; Predicted intracellular proteins	Endoplasmic reticulum (Approved)	Artenimol			1.0	0.0	0.0	0.0	0.0	0.0	0.0	0.0	0.0	0.0	0.0	0.0	0.0	0.0	0.0	0.0	0.0	0.0	0.0	0.0
ENSDARG00000020504	406269	ensembl_gene_id	D. rerio	3020	H. sapiens	H3-3A	H3.3 histone A	GO:1902340 negative regulation of chromosome condensation;GO:0031509 telomeric heterochromatin assembly;GO:0031508 pericentric heterochromatin assembly		Cancer-related genes; Disease related genes; Predicted intracellular proteins	Nucleoplasm (Supported)				1.0	0.0	0.0	0.0	0.0	0.0	0.0	0.0	0.0	0.0	0.0	0.0	1.0	0.0	0.0	0.0	0.0	0.0	0.0	0.0
ENSDARG00000091656	566017	ensembl_gene_id	D. rerio	51691	H. sapiens	LSM8	LSM8 homolog, U6 small nuclear RNA associated	GO:0000377 RNA splicing, via transesterification reactions with bulged adenosine as nucleophile;GO:0000398 mRNA splicing, via spliceosome;GO:0000375 RNA splicing, via transesterification reactions		Predicted intracellular proteins	Nucleoplasm;Vesicles (Approved)				1.0	0.0	0.0	0.0	0.0	0.0	0.0	0.0	0.0	0.0	0.0	0.0	0.0	0.0	0.0	0.0	0.0	0.0	0.0	0.0
ENSDARG00000039268	402956	ensembl_gene_id	D. rerio	51234	H. sapiens	EMC4	ER membrane protein complex subunit 4	GO:0045050 protein insertion into ER membrane by stop-transfer membrane-anchor sequence;GO:0071816 tail-anchored membrane protein insertion into ER membrane;GO:0045048 protein insertion into ER membrane		Transporters:Primary Active Transporters; Predicted intracellular proteins	Focal adhesion sites (Supported)				1.0	0.0	0.0	0.0	0.0	0.0	0.0	0.0	0.0	0.0	0.0	0.0	0.0	0.0	0.0	0.0	0.0	0.0	0.0	0.0
ENSDARG00000094310	799480	ensembl_gene_id	D. rerio			None	None	None	None	None	None	None	None	None	nan	nan	nan	nan	nan	nan	nan	nan	nan	nan	nan	nan	nan	nan	nan	nan	nan	nan	nan	nan
ENSDARG00000101584						None	None	None	None	None	None	None	None	None	nan	nan	nan	nan	nan	nan	nan	nan	nan	nan	nan	nan	nan	nan	nan	nan	nan	nan	nan	nan
ENSDARG00000099014	503884	ensembl_gene_id	D. rerio			None	None	None	None	None	None	None	None	None	nan	nan	nan	nan	nan	nan	nan	nan	nan	nan	nan	nan	nan	nan	nan	nan	nan	nan	nan	nan
ENSDARG00000036438	445291	ensembl_gene_id	D. rerio	4723	H. sapiens	NDUFV1	NADH:ubiquinone oxidoreductase core subunit V1	GO:0006120 mitochondrial electron transport, NADH to ubiquinone;GO:0010257 NADH dehydrogenase complex assembly;GO:0032981 mitochondrial respiratory chain complex I assembly		ENZYME proteins:Oxidoreductases; Disease related genes; Enzymes; Potential drug targets; Predicted intracellular proteins	Mitochondria (Supported); Additional: Cytosol	NADH		(M5936)HALLMARK OXIDATIVE PHOSPHORYLATION	0.0	1.0	0.0	0.0	0.0	0.0	0.0	1.0	0.0	0.0	0.0	0.0	0.0	0.0	0.0	0.0	0.0	0.0	0.0	0.0
ENSDARG00000092873	557217	ensembl_gene_id	D. rerio			None	None	None	None	None	None	None	None	None	nan	nan	nan	nan	nan	nan	nan	nan	nan	nan	nan	nan	nan	nan	nan	nan	nan	nan	nan	nan
ENSDARG00000037071	336662	ensembl_gene_id	D. rerio	6231	H. sapiens	RPS26	ribosomal protein S26	GO:0033119 negative regulation of RNA splicing;GO:0002181 cytoplasmic translation;GO:0006614 SRP-dependent cotranslational protein targeting to membrane		Disease related genes; Ribosomal proteins; Predicted intracellular proteins	Cytosol;Endoplasmic reticulum (Enhanced); Additional: Nucleoli				1.0	0.0	0.0	0.0	0.0	0.0	0.0	0.0	0.0	0.0	0.0	0.0	0.0	0.0	0.0	0.0	0.0	0.0	0.0	0.0
ENSDARG00000045367	373080	ensembl_gene_id	D. rerio	84790	H. sapiens	TUBA1C	tubulin alpha 1c	GO:0030705 cytoskeleton-dependent intracellular transport;GO:0051301 cell division;GO:0000226 microtubule cytoskeleton organization		Predicted intracellular proteins	Microtubules (Supported)	Epothilone D; Patupilone; CYT997; 2-MERCAPTO-N-[1,2,3,10-TETRAMETHOXY-9-OXO-5,6,7,9-TETRAHYDRO-BENZO[A]HEPTALEN-7-YL]ACETAMIDE			1.0	0.0	1.0	1.0	0.0	0.0	0.0	0.0	0.0	0.0	0.0	0.0	0.0	0.0	0.0	0.0	0.0	1.0	0.0	0.0
ENSDARG00000011841	326977	ensembl_gene_id	D. rerio	10632	H. sapiens	ATP5MG	ATP synthase membrane subunit g	GO:0042776 mitochondrial ATP synthesis coupled proton transport;GO:0015985 energy coupled proton transport, down electrochemical gradient;GO:0015986 ATP synthesis coupled proton transport		Predicted intracellular proteins	Mitochondria (Supported)	Artenimol; Phenethyl Isothiocyanate		(M5936)HALLMARK OXIDATIVE PHOSPHORYLATION	0.0	1.0	1.0	0.0	0.0	0.0	0.0	0.0	0.0	0.0	0.0	0.0	0.0	0.0	0.0	0.0	0.0	0.0	0.0	0.0
ENSDARG00000093382	558925	ensembl_gene_id	D. rerio	790955	H. sapiens	UQCC3	ubiquinol-cytochrome c reductase complex assembly factor 3	GO:0017062 respiratory chain complex III assembly;GO:0034551 mitochondrial respiratory chain complex III assembly;GO:0006122 mitochondrial electron transport, ubiquinol to cytochrome c		Disease related genes	Mitochondria;Nucleoplasm (Approved); Additional: Cytosol				0.0	1.0	1.0	0.0	0.0	0.0	0.0	0.0	0.0	0.0	0.0	0.0	0.0	0.0	0.0	0.0	0.0	0.0	0.0	0.0
ENSDARG00000056903	553555	ensembl_gene_id	D. rerio	28998	H. sapiens	MRPL13	mitochondrial ribosomal protein L13	GO:0070125 mitochondrial translational elongation;GO:0070126 mitochondrial translational termination;GO:0006415 translational termination		Ribosomal proteins; Predicted intracellular proteins					1.0	0.0	0.0	0.0	0.0	0.0	0.0	0.0	0.0	0.0	0.0	0.0	0.0	1.0	0.0	0.0	0.0	0.0	0.0	0.0
ENSDARG00000078075	541415	ensembl_gene_id	D. rerio	64771	H. sapiens	ILRUN	inflammation and lipid regulator with UBA-like and NBR1-like domains	GO:0050687 negative regulation of defense response to virus;GO:1900181 negative regulation of protein localization to nucleus;GO:0002832 negative regulation of response to biotic stimulus		Predicted intracellular proteins	Nuclear speckles (Supported); Additional: Centrosome;Cytosol				0.0	0.0	0.0	0.0	0.0	1.0	0.0	0.0	0.0	0.0	0.0	0.0	0.0	0.0	0.0	0.0	0.0	0.0	0.0	0.0
ENSDARG00000038030	449846	ensembl_gene_id	D. rerio	9978	H. sapiens	RBX1	ring-box 1	GO:1902499 positive regulation of protein autoubiquitination;GO:0010265 SCF complex assembly;GO:1902498 regulation of protein autoubiquitination		ENZYME proteins:Transferases; Enzymes; Predicted intracellular proteins	Nucleoplasm (Supported)		(M180)PID HIF1A PATHWAY	(M5903)HALLMARK NOTCH SIGNALING; (M5898)HALLMARK DNA REPAIR	1.0	0.0	0.0	0.0	0.0	0.0	0.0	0.0	1.0	1.0	0.0	0.0	0.0	0.0	0.0	0.0	0.0	0.0	0.0	0.0
ENSDARG00000098451	571836	ensembl_gene_id	D. rerio	148534	H. sapiens	TLCD4	TLC domain containing 4	GO:0055088 lipid homeostasis;GO:0048878 chemical homeostasis;GO:0042592 homeostatic process			Nuclear speckles (Approved)				0.0	0.0	0.0	0.0	0.0	0.0	0.0	0.0	0.0	0.0	0.0	0.0	0.0	0.0	0.0	0.0	0.0	0.0	0.0	0.0
ENSDARG00000104181	798430	ensembl_gene_id	D. rerio			None	None	None	None	None	None	None	None	None	nan	nan	nan	nan	nan	nan	nan	nan	nan	nan	nan	nan	nan	nan	nan	nan	nan	nan	nan	nan
ENSDARG00000075883	403012	ensembl_gene_id	D. rerio	9184	H. sapiens	BUB3	BUB3 mitotic checkpoint protein	GO:0034501 protein localization to kinetochore;GO:0071459 protein localization to chromosome, centromeric region;GO:0008608 attachment of spindle microtubules to kinetochore		Predicted intracellular proteins	Nucleoplasm (Supported)		(M19)PID P73PATHWAY	(M5901)HALLMARK G2M CHECKPOINT; (M5926)HALLMARK MYC TARGETS V1	0.0	0.0	0.0	0.0	0.0	0.0	0.0	0.0	1.0	0.0	0.0	0.0	1.0	0.0	0.0	0.0	0.0	0.0	0.0	0.0
ENSDARG00000030265	553734	ensembl_gene_id	D. rerio	6319	H. sapiens	SCD	stearoyl-CoA desaturase	GO:1903966 monounsaturated fatty acid biosynthetic process;GO:1903964 monounsaturated fatty acid metabolic process;GO:0046949 fatty-acyl-CoA biosynthetic process		Enzymes; ENZYME proteins:Oxidoreductases	Endoplasmic reticulum (Enhanced)			(M5892)HALLMARK CHOLESTEROL HOMEOSTASIS; (M5908)HALLMARK ANDROGEN RESPONSE; (M5909)HALLMARK MYOGENESIS	0.0	1.0	1.0	0.0	0.0	0.0	0.0	0.0	0.0	0.0	0.0	0.0	0.0	0.0	0.0	0.0	0.0	0.0	0.0	1.0
ENSDARG00000017314	445282	ensembl_gene_id	D. rerio	1990	H. sapiens	CELA1	chymotrypsin like elastase 1	GO:0061113 pancreas morphogenesis;GO:0060309 elastin catabolic process;GO:0031017 exocrine pancreas development		ENZYME proteins:Hydrolases; Enzymes; Peptidases:Serine-type peptidases; Predicted secreted proteins; Predicted intracellular proteins		N,N-dimethylformamide; Cumidine; Mdl 101,146; 2-[5-Methanesulfonylamino-2-(4-Aminophenyl)-6-Oxo-1,6-Dihydro-1-Pyrimidinyl]-N-(3,3,3-Trifluoro-1-Isopropyl-2-Oxopropyl)Acetamide; N-{4-[(Carboxymethyl)carbamoyl]benzoyl}-L-valyl-N-[(3S)-1,1,1-trifluoro-4-methyl-2-oxo-3-pentanyl]-L-prolinamide; N-{[(2-Methyl-2-propanyl)oxy]carbonyl}-L-alanyl-L-alaninamide; N-[2-(1-Formyl-2-Methyl-Propyl)-1-(4-Piperidi…	(M3468)NABA ECM REGULATORS; (M5885)NABA MATRISOME ASSOCIATED; (M5889)NABA MATRISOME		0.0	0.0	0.0	0.0	0.0	0.0	0.0	0.0	0.0	0.0	0.0	0.0	0.0	0.0	0.0	0.0	0.0	0.0	0.0	0.0
ENSDARG00000088823	790908	ensembl_gene_id	D. rerio	1415	H. sapiens	CRYBB2	crystallin beta B2	GO:0002088 lens development in camera-type eye;GO:0007601 visual perception;GO:0050953 sensory perception of light stimulus		Disease related genes; Predicted intracellular proteins	Nucleoplasm (Approved)				0.0	0.0	0.0	0.0	0.0	0.0	0.0	0.0	0.0	0.0	0.0	0.0	0.0	0.0	0.0	0.0	0.0	0.0	0.0	0.0
ENSDARG00000056549	393881	ensembl_gene_id	D. rerio	9559	H. sapiens	VPS26A	VPS26, retromer complex component A	GO:1990126 retrograde transport, endosome to plasma membrane;GO:0098876 vesicle-mediated transport to the plasma membrane;GO:0042147 retrograde transport, endosome to Golgi		Predicted intracellular proteins	Endosomes;Lysosomes (Enhanced)				0.0	0.0	0.0	0.0	0.0	1.0	0.0	0.0	0.0	0.0	0.0	0.0	0.0	0.0	0.0	0.0	0.0	0.0	0.0	0.0
ENSDARG00000095908	431716	ensembl_gene_id	D. rerio	6303	H. sapiens	SAT1	spermidine/spermine N1-acetyltransferase 1	GO:0009447 putrescine catabolic process;GO:0032917 polyamine acetylation;GO:0032918 spermidine acetylation		Disease related genes; ENZYME proteins:Transferases; Enzymes; Potential drug targets; Predicted intracellular proteins		N-ethyl-N-[3-(propylamino)propyl]propane-1,3-diamine	(M118)PID INTEGRIN A9B1 PATHWAY	(M5908)HALLMARK ANDROGEN RESPONSE; (M5902)HALLMARK APOPTOSIS; (M5890)HALLMARK TNFA SIGNALING VIA NFKB	1.0	0.0	0.0	0.0	0.0	0.0	0.0	0.0	0.0	0.0	0.0	0.0	0.0	0.0	0.0	0.0	0.0	0.0	0.0	0.0
ENSDARG00000070437	557397	ensembl_gene_id	D. rerio	6146	H. sapiens	RPL22	ribosomal protein L22	GO:0099577 regulation of translation at presynapse, modulating synaptic transmission;GO:0140244 regulation of translation at presynapse;GO:0099547 regulation of translation at synapse, modulating synaptic transmission		Cancer-related genes:Mutational cancer driver genes; Ribosomal proteins; Predicted intracellular proteins	Nucleoli (Approved); Additional: Nucleoplasm			(M5926)HALLMARK MYC TARGETS V1	1.0	0.0	0.0	0.0	0.0	0.0	0.0	0.0	0.0	0.0	0.0	0.0	0.0	0.0	0.0	1.0	0.0	0.0	0.0	0.0
ENSDARG00000092693	30723	ensembl_gene_id	D. rerio	7178	H. sapiens	TPT1	tumor protein, translationally-controlled 1	GO:1902230 negative regulation of intrinsic apoptotic signaling pathway in response to DNA damage;GO:1902229 regulation of intrinsic apoptotic signaling pathway in response to DNA damage;GO:2001021 negative regulation of response to DNA damage stimulus		Predicted intracellular proteins	Cytosol (Supported)	Calcium citrate; Calcium Phosphate; Calcium phosphate dihydrate	(M129)PID PLK1 PATHWAY		0.0	0.0	0.0	0.0	0.0	0.0	0.0	0.0	0.0	0.0	0.0	1.0	0.0	0.0	0.0	0.0	1.0	0.0	0.0	0.0
ENSDARG00000015128	325618	ensembl_gene_id	D. rerio	6155	H. sapiens	RPL27	ribosomal protein L27	GO:0006614 SRP-dependent cotranslational protein targeting to membrane;GO:0006613 cotranslational protein targeting to membrane;GO:0045047 protein targeting to ER		Predicted intracellular proteins; Disease related genes; Ribosomal proteins; Cancer-related genes:Candidate cancer biomarkers	Nucleoli (Enhanced); Additional: Nucleoplasm				1.0	0.0	0.0	1.0	0.0	0.0	1.0	0.0	0.0	0.0	0.0	0.0	0.0	0.0	0.0	0.0	0.0	0.0	0.0	0.0
ENSDARG00000006370	286779	ensembl_gene_id	D. rerio	51606	H. sapiens	ATP6V1H	ATPase H+ transporting V1 subunit H	GO:0007035 vacuolar acidification;GO:0090383 phagosome acidification;GO:0050690 regulation of defense response to virus by virus		Transporters:Primary Active Transporters; Predicted intracellular proteins	Actin filaments;Cytosol (Supported); Additional: Plasma membrane			(M5910)HALLMARK PROTEIN SECRETION; (M5936)HALLMARK OXIDATIVE PHOSPHORYLATION	1.0	1.0	1.0	0.0	0.0	1.0	0.0	0.0	0.0	0.0	0.0	1.0	0.0	0.0	0.0	0.0	0.0	0.0	0.0	0.0
ENSDARG00000045618	406318	ensembl_gene_id	D. rerio	1211	H. sapiens	CLTA	clathrin light chain A	GO:0032799 low-density lipoprotein receptor particle metabolic process;GO:0032802 low-density lipoprotein particle receptor catabolic process;GO:0048268 clathrin coat assembly		Predicted intracellular proteins	Endosomes;Lysosomes;Vesicles (Enhanced)		(M243)PID ARF 3PATHWAY; (M195)PID CMYB PATHWAY	(M5910)HALLMARK PROTEIN SECRETION	1.0	1.0	0.0	0.0	0.0	0.0	0.0	0.0	1.0	0.0	0.0	0.0	0.0	0.0	0.0	0.0	0.0	0.0	0.0	0.0
ENSDARG00000040764	30493	ensembl_gene_id	D. rerio	3397	H. sapiens	ID1	inhibitor of DNA binding 1, HLH protein	GO:0036164 cell-abiotic substrate adhesion;GO:0010621 negative regulation of transcription by transcription factor localization;GO:0045602 negative regulation of endothelial cell differentiation		Predicted intracellular proteins; Transcription factors:Basic domains; Cancer-related genes:Candidate cancer biomarkers	Nucleoplasm (Enhanced)		(M182)PID IL3 PATHWAY; (M185)PID ALK1 PATHWAY; (M288)PID HES HEY PATHWAY	(M5896)HALLMARK TGF BETA SIGNALING; (M5942)HALLMARK UV RESPONSE DN	1.0	0.0	0.0	1.0	1.0	0.0	0.0	0.0	0.0	0.0	0.0	0.0	1.0	0.0	0.0	0.0	0.0	0.0	0.0	0.0
ENSDARG00000070985	100073334	ensembl_gene_id	D. rerio	54460	H. sapiens	MRPS21	mitochondrial ribosomal protein S21	GO:0070125 mitochondrial translational elongation;GO:0070126 mitochondrial translational termination;GO:0006415 translational termination		Predicted intracellular proteins	Mitochondria (Supported)				1.0	0.0	0.0	0.0	0.0	0.0	0.0	0.0	0.0	0.0	0.0	0.0	0.0	1.0	0.0	0.0	0.0	0.0	0.0	0.0
ENSDARG00000053457	336812	ensembl_gene_id	D. rerio	9349	H. sapiens	RPL23	ribosomal protein L23	GO:0072717 cellular response to actinomycin D;GO:0006610 ribosomal protein import into nucleus;GO:0072716 response to actinomycin D		Ribosomal proteins; Predicted intracellular proteins	Cytosol (Supported)	(S)-3-phenyllactic acid; Anisomycin; Puromycin	(M261)PID P53 REGULATION PATHWAY		1.0	0.0	0.0	0.0	1.0	1.0	0.0	0.0	1.0	1.0	0.0	0.0	0.0	1.0	1.0	0.0	0.0	0.0	0.0	0.0
ENSDARG00000036044	406485	ensembl_gene_id	D. rerio	6224	H. sapiens	RPS20	ribosomal protein S20	GO:0006614 SRP-dependent cotranslational protein targeting to membrane;GO:0006613 cotranslational protein targeting to membrane;GO:0045047 protein targeting to ER		Ribosomal proteins; Predicted intracellular proteins	Cytosol;Endoplasmic reticulum (Supported)				1.0	0.0	0.0	0.0	0.0	0.0	0.0	0.0	0.0	0.0	0.0	0.0	0.0	0.0	0.0	0.0	0.0	0.0	0.0	0.0
ENSDARG00000058463	573619	ensembl_gene_id	D. rerio	4706	H. sapiens	NDUFAB1	NADH:ubiquinone oxidoreductase subunit AB1	GO:0009249 protein lipoylation;GO:0018065 protein-cofactor linkage;GO:0006120 mitochondrial electron transport, NADH to ubiquinone		Predicted intracellular proteins	Mitochondria (Supported); Additional: Nucleoplasm	NADH		(M5905)HALLMARK ADIPOGENESIS; (M5926)HALLMARK MYC TARGETS V1; (M5936)HALLMARK OXIDATIVE PHOSPHORYLATION	1.0	1.0	0.0	0.0	0.0	0.0	0.0	0.0	0.0	0.0	0.0	0.0	0.0	0.0	0.0	0.0	0.0	0.0	0.0	1.0
ENSDARG00000103505	378451	ensembl_gene_id	D. rerio	26224	H. sapiens	FBXL3	F-box and leucine rich repeat protein 3	GO:0043153 entrainment of circadian clock by photoperiod;GO:0009648 photoperiodism;GO:0009649 entrainment of circadian clock		Predicted intracellular proteins	Nuclear bodies (Enhanced)				0.0	0.0	0.0	0.0	0.0	0.0	0.0	0.0	1.0	0.0	0.0	0.0	0.0	0.0	1.0	0.0	0.0	0.0	0.0	0.0
ENSDARG00000017084	445383	ensembl_gene_id	D. rerio	8896	H. sapiens	BUD31	BUD31 homolog	GO:2000823 regulation of androgen receptor activity;GO:2000825 positive regulation of androgen receptor activity;GO:0033145 positive regulation of intracellular steroid hormone receptor signaling pathway		Predicted intracellular proteins	Nucleoplasm (Approved); Additional: Centrosome;Microtubules				1.0	0.0	0.0	0.0	0.0	0.0	0.0	0.0	0.0	0.0	0.0	0.0	0.0	0.0	0.0	0.0	0.0	0.0	0.0	0.0
ENSDARG00000063911	140519	ensembl_gene_id	D. rerio	4508	H. sapiens	ATP6	ATP synthase F0 subunit 6	GO:0055093 response to hyperoxia;GO:0042776 mitochondrial ATP synthesis coupled proton transport;GO:0015985 energy coupled proton transport, down electrochemical gradient		Disease related genes		Estradiol; Estradiol acetate; Estradiol benzoate; Estradiol cypionate; Estradiol dienanthate; Estradiol valerate			0.0	1.0	1.0	0.0	0.0	0.0	0.0	0.0	0.0	0.0	0.0	0.0	0.0	0.0	0.0	0.0	0.0	0.0	0.0	0.0
ENSDARG00000007320	336710	ensembl_gene_id	D. rerio	6129	H. sapiens	RPL7	ribosomal protein L7	GO:0000463 maturation of LSU-rRNA from tricistronic rRNA transcript (SSU-rRNA, 5.8S rRNA, LSU-rRNA);GO:0000470 maturation of LSU-rRNA;GO:0042273 ribosomal large subunit biogenesis		Ribosomal proteins; Predicted intracellular proteins	Cytosol;Endoplasmic reticulum (Approved); Additional: Nucleoli				1.0	0.0	0.0	1.0	0.0	0.0	1.0	0.0	0.0	0.0	0.0	0.0	0.0	0.0	0.0	0.0	0.0	0.0	0.0	0.0
ENSDARG00000033175	393979	ensembl_gene_id	D. rerio	6635	H. sapiens	SNRPE	small nuclear ribonucleoprotein polypeptide E	GO:0008334 histone mRNA metabolic process;GO:0006369 termination of RNA polymerase II transcription;GO:0000387 spliceosomal snRNP assembly		Disease related genes; Predicted intracellular proteins					1.0	0.0	0.0	0.0	0.0	0.0	1.0	0.0	0.0	0.0	0.0	0.0	0.0	0.0	0.0	0.0	0.0	0.0	0.0	0.0
ENSDARG00000030349	415139	ensembl_gene_id	D. rerio	1412	H. sapiens	CRYBA2	crystallin beta A2	GO:0002088 lens development in camera-type eye;GO:0007601 visual perception;GO:0050953 sensory perception of light stimulus		Disease related genes; Predicted intracellular proteins					0.0	0.0	0.0	0.0	0.0	0.0	0.0	0.0	0.0	0.0	0.0	0.0	0.0	0.0	0.0	0.0	0.0	0.0	0.0	0.0
ENSDARG00000102317	406387	ensembl_gene_id	D. rerio	6154	H. sapiens	RPL26	ribosomal protein L26	GO:1902167 positive regulation of intrinsic apoptotic signaling pathway in response to DNA damage by p53 class mediator;GO:1904803 regulation of translation involved in cellular response to UV;GO:1902162 regulation of DNA damage response, signal transduction by p53 class mediator resulting in transcription of p21 class mediator		Disease related genes; Ribosomal proteins; Predicted intracellular proteins	Cytosol;Endoplasmic reticulum (Supported); Additional: Nucleoli				1.0	0.0	0.0	1.0	0.0	0.0	1.0	0.0	0.0	0.0	0.0	0.0	0.0	0.0	0.0	0.0	1.0	0.0	0.0	0.0
ENSDARG00000035914	541340	ensembl_gene_id	D. rerio	153339	H. sapiens	TMEM167A	transmembrane protein 167A	GO:0045054 constitutive secretory pathway;GO:0009306 protein secretion;GO:0002790 peptide secretion			Vesicles (Approved)				0.0	0.0	0.0	0.0	0.0	0.0	0.0	0.0	0.0	0.0	0.0	0.0	0.0	0.0	0.0	0.0	0.0	0.0	0.0	0.0
ENSDARG00000019096	30592	ensembl_gene_id	D. rerio	58498	H. sapiens	MYL7	myosin light chain 7	GO:0006936 muscle contraction;GO:0003012 muscle system process;GO:0003008 system process		Predicted intracellular proteins				(M5909)HALLMARK MYOGENESIS	0.0	0.0	0.0	0.0	0.0	0.0	0.0	0.0	0.0	0.0	0.0	0.0	0.0	0.0	0.0	0.0	0.0	0.0	1.0	0.0
ENSDARG00000006019	378713	ensembl_gene_id	D. rerio	84076	H. sapiens	TKTL2	transketolase like 2			ENZYME proteins:Transferases; Enzymes; Predicted intracellular proteins					0.0	0.0	0.0	0.0	0.0	0.0	0.0	0.0	0.0	0.0	0.0	0.0	0.0	0.0	0.0	0.0	0.0	0.0	0.0	0.0
ENSDARG00000016904	282677	ensembl_gene_id	D. rerio	10295	H. sapiens	BCKDK	branched chain keto acid dehydrogenase kinase	GO:0009083 branched-chain amino acid catabolic process;GO:0009081 branched-chain amino acid metabolic process;GO:0010906 regulation of glucose metabolic process	Atypical: PDK/BCKDK protein kinase family	Disease related genes; ENZYME proteins:Transferases; Enzymes; Kinases:Atypical kinases; Potential drug targets; Predicted intracellular proteins	Mitochondria (Supported)	Adenosine 5'-[gamma-thio]triphosphate			1.0	0.0	0.0	0.0	0.0	0.0	0.0	0.0	0.0	0.0	0.0	0.0	0.0	0.0	0.0	0.0	0.0	0.0	0.0	0.0
ENSDARG00000094695	100537752	ensembl_gene_id	D. rerio	79870	H. sapiens	BAALC	BAALC binder of MAP3K1 and KLF4			Predicted intracellular proteins	Cytosol (Supported); Additional: Nucleoplasm				0.0	0.0	0.0	0.0	0.0	0.0	0.0	0.0	0.0	0.0	0.0	0.0	0.0	0.0	0.0	0.0	0.0	0.0	0.0	0.0
ENSDARG00000104458	336290	ensembl_gene_id	D. rerio	440400	H. sapiens	RNASEK	ribonuclease K	GO:0090502 RNA phosphodiester bond hydrolysis, endonucleolytic;GO:0090501 RNA phosphodiester bond hydrolysis;GO:0090305 nucleic acid phosphodiester bond hydrolysis		Transporters:Primary Active Transporters; Predicted intracellular proteins					0.0	0.0	0.0	0.0	0.0	0.0	0.0	0.0	0.0	0.0	0.0	0.0	0.0	0.0	0.0	0.0	0.0	0.0	0.0	0.0
ENSDARG00000070447	541413	ensembl_gene_id	D. rerio	55334	H. sapiens	SLC39A9	solute carrier family 39 member 9	GO:0006829 zinc ion transport;GO:0000041 transition metal ion transport;GO:0070838 divalent metal ion transport		Transporters:Electrochemical Potential-driven transporters	Endoplasmic reticulum (Approved)				0.0	0.0	0.0	0.0	0.0	0.0	0.0	0.0	0.0	0.0	0.0	0.0	0.0	0.0	0.0	0.0	0.0	0.0	0.0	0.0
ENSDARG00000104996	436792	ensembl_gene_id	D. rerio	94107	H. sapiens	TMEM203	transmembrane protein 203	GO:0006874 cellular calcium ion homeostasis;GO:0055074 calcium ion homeostasis;GO:0072503 cellular divalent inorganic cation homeostasis		Transporters:Accessory Factors Involved in Transport					0.0	0.0	0.0	0.0	0.0	0.0	0.0	0.0	0.0	0.0	0.0	1.0	0.0	0.0	0.0	0.0	0.0	0.0	0.0	0.0
ENSDARG00000031649	751721	ensembl_gene_id	D. rerio	1325	H. sapiens	CORT	cortistatin	GO:0000712 resolution of meiotic recombination intermediates;GO:0051307 meiotic chromosome separation;GO:0031297 replication fork processing		Predicted secreted proteins					0.0	0.0	0.0	0.0	0.0	0.0	0.0	0.0	0.0	0.0	0.0	0.0	0.0	0.0	0.0	1.0	0.0	0.0	0.0	0.0
ENSDARG00000041314	573021	ensembl_gene_id	D. rerio	4715	H. sapiens	NDUFB9	NADH:ubiquinone oxidoreductase subunit B9	GO:0006120 mitochondrial electron transport, NADH to ubiquinone;GO:0010257 NADH dehydrogenase complex assembly;GO:0032981 mitochondrial respiratory chain complex I assembly		Predicted intracellular proteins	Mitochondria (Supported)	NADH			0.0	1.0	0.0	0.0	0.0	0.0	0.0	0.0	0.0	0.0	0.0	0.0	0.0	0.0	0.0	0.0	0.0	0.0	0.0	0.0
ENSDARG00000036359	393308	ensembl_gene_id	D. rerio	84864	H. sapiens	RIOX2	ribosomal oxygenase 2	GO:0034720 histone H3-K4 demethylation;GO:0070544 histone H3-K36 demethylation;GO:0070076 histone lysine demethylation		Predicted intracellular proteins	Nucleoli;Nucleoplasm (Supported)		(M66)PID MYC ACTIV PATHWAY		0.0	0.0	0.0	0.0	0.0	0.0	1.0	0.0	0.0	0.0	0.0	0.0	0.0	0.0	0.0	0.0	0.0	0.0	0.0	0.0
ENSDARG00000087164	790917	ensembl_gene_id	D. rerio	1415	H. sapiens	CRYBB2	crystallin beta B2	GO:0002088 lens development in camera-type eye;GO:0007601 visual perception;GO:0050953 sensory perception of light stimulus		Disease related genes; Predicted intracellular proteins	Nucleoplasm (Approved)				0.0	0.0	0.0	0.0	0.0	0.0	0.0	0.0	0.0	0.0	0.0	0.0	0.0	0.0	0.0	0.0	0.0	0.0	0.0	0.0
ENSDARG00000002082	30502	ensembl_gene_id	D. rerio	283106	H. sapiens	CSNK2A3	casein kinase 2 alpha 3		Other	Kinases; ENZYME proteins:Transferases; Enzymes; Predicted intracellular proteins	Nucleoplasm (Approved)				0.0	0.0	0.0	0.0	0.0	0.0	0.0	0.0	0.0	0.0	0.0	0.0	0.0	0.0	0.0	0.0	0.0	0.0	0.0	0.0
ENSDARG00000042993	65223	ensembl_gene_id	D. rerio	5644	H. sapiens	PRSS1	serine protease 1	GO:0009235 cobalamin metabolic process;GO:0033013 tetrapyrrole metabolic process;GO:0022617 extracellular matrix disassembly		ENZYME proteins:Hydrolases; Disease related genes; Enzymes; FDA approved drug targets:Small molecule drugs; Peptidases:Serine-type peptidases; Predicted secreted proteins; Cancer-related genes:Candidate cancer biomarkers; Predicted intracellular proteins	Vesicles (Approved); Additional: Endoplasmic reticulum	2H-Benzimidazol-2-amine; Bis(5-Amidino-Benzimidazolyl)Methane; 2-{2-hydroxy-[1,1'-biphenyl]-3-yl}-1H-1,3-benzodiazole-5-carboximidamide; Nalpha-(2-Naphthylsulfonylglycyl)-3-Amidino-D,L-Phenylalanine-Isopropylester; CRA_17693; N-Alpha-(2-Naphthylsulfonyl)-N(3-Amidino-L-Phenylalaninyl)Isopipecolinic Acid Methyl Ester; Hemi-Babim; CRA_10991; Monoisopropylphosphorylserine; [4-(6-Chloro-Naphthalene-2-…	(M3468)NABA ECM REGULATORS; (M5885)NABA MATRISOME ASSOCIATED; (M5889)NABA MATRISOME		0.0	0.0	0.0	0.0	0.0	0.0	0.0	0.0	0.0	0.0	0.0	0.0	0.0	1.0	0.0	0.0	0.0	0.0	0.0	0.0
ENSDARG00000038559	321618	ensembl_gene_id	D. rerio	3005	H. sapiens	H1-0	H1.0 linker histone	GO:0016584 nucleosome positioning;GO:0031936 negative regulation of chromatin silencing;GO:0006309 apoptotic DNA fragmentation		Predicted intracellular proteins	Nuclear bodies;Nucleoplasm (Supported); Additional: Actin filaments;Golgi apparatus			(M5908)HALLMARK ANDROGEN RESPONSE; (M5902)HALLMARK APOPTOSIS; (M5945)HALLMARK HEME METABOLISM	1.0	0.0	0.0	0.0	0.0	0.0	0.0	0.0	0.0	0.0	0.0	0.0	1.0	1.0	0.0	0.0	0.0	0.0	0.0	0.0
ENSDARG00000104814						None	None	None	None	None	None	None	None	None	nan	nan	nan	nan	nan	nan	nan	nan	nan	nan	nan	nan	nan	nan	nan	nan	nan	nan	nan	nan
ENSDARG00000030753	550330	ensembl_gene_id	D. rerio	79056	H. sapiens	PRRG4	proline rich and Gla domain 4	GO:0008150 biological_process			Golgi apparatus (Approved)				0.0	0.0	0.0	0.0	0.0	0.0	0.0	0.0	0.0	0.0	0.0	0.0	0.0	0.0	0.0	0.0	0.0	0.0	0.0	0.0
ENSDARG00000017775	394151	ensembl_gene_id	D. rerio	518	H. sapiens	ATP5MC3	ATP synthase membrane subunit c locus 3	GO:0042776 mitochondrial ATP synthesis coupled proton transport;GO:0015985 energy coupled proton transport, down electrochemical gradient;GO:0015986 ATP synthesis coupled proton transport						(M5936)HALLMARK OXIDATIVE PHOSPHORYLATION	0.0	1.0	1.0	0.0	0.0	0.0	0.0	0.0	0.0	0.0	0.0	0.0	0.0	0.0	0.0	0.0	0.0	0.0	0.0	0.0
ENSDARG00000033789	393821	ensembl_gene_id	D. rerio	4713	H. sapiens	NDUFB7	NADH:ubiquinone oxidoreductase subunit B7	GO:0006120 mitochondrial electron transport, NADH to ubiquinone;GO:0010257 NADH dehydrogenase complex assembly;GO:0032981 mitochondrial respiratory chain complex I assembly		Predicted intracellular proteins		NADH		(M5905)HALLMARK ADIPOGENESIS; (M5936)HALLMARK OXIDATIVE PHOSPHORYLATION	0.0	1.0	0.0	0.0	0.0	0.0	0.0	0.0	0.0	0.0	0.0	0.0	0.0	0.0	0.0	0.0	0.0	0.0	0.0	0.0
ENSDARG00000012125	572249	ensembl_gene_id	D. rerio	1259	H. sapiens	CNGA1	cyclic nucleotide gated channel subunit alpha 1	GO:0022400 regulation of rhodopsin mediated signaling pathway;GO:0016056 rhodopsin mediated signaling pathway;GO:0007603 phototransduction, visible light		Disease related genes; Transporters:Transporter channels and pores; Potential drug targets; Voltage-gated ion channels:Cyclic Nucleotide-Regulated Channels; Predicted intracellular proteins	Plasma membrane;Vesicles (Approved); Additional: Nucleoplasm	Dequalinium	(M204)PID RHODOPSIN PATHWAY		0.0	0.0	0.0	0.0	0.0	0.0	0.0	0.0	0.0	0.0	0.0	0.0	0.0	0.0	0.0	0.0	0.0	0.0	0.0	0.0
ENSDARG00000053129	393534	ensembl_gene_id	D. rerio	23589	H. sapiens	CARHSP1	calcium regulated heat stable protein 1	GO:0043488 regulation of mRNA stability;GO:0043487 regulation of RNA stability;GO:0061013 regulation of mRNA catabolic process		Predicted intracellular proteins					1.0	0.0	0.0	0.0	0.0	0.0	0.0	0.0	0.0	0.0	0.0	0.0	0.0	0.0	0.0	0.0	0.0	0.0	0.0	0.0
ENSDARG00000092610	563328	ensembl_gene_id	D. rerio	3916	H. sapiens	LAMP1	lysosomal associated membrane protein 1	GO:0043321 regulation of natural killer cell degranulation;GO:0043323 positive regulation of natural killer cell degranulation;GO:0048102 autophagic cell death		CD markers; Transporters					1.0	0.0	0.0	0.0	0.0	0.0	0.0	0.0	0.0	0.0	0.0	0.0	0.0	0.0	1.0	0.0	0.0	0.0	0.0	0.0
ENSDARG00000104011	393818	ensembl_gene_id	D. rerio			None	None	None	None	None	None	None	None	None	nan	nan	nan	nan	nan	nan	nan	nan	nan	nan	nan	nan	nan	nan	nan	nan	nan	nan	nan	nan
ENSDARG00000019008	393866	ensembl_gene_id	D. rerio	23071	H. sapiens	ERP44	endoplasmic reticulum protein 44	GO:0045454 cell redox homeostasis;GO:0006986 response to unfolded protein;GO:0035966 response to topologically incorrect protein		Predicted intracellular proteins					0.0	0.0	0.0	0.0	0.0	0.0	0.0	0.0	0.0	0.0	0.0	0.0	0.0	0.0	0.0	0.0	0.0	0.0	0.0	0.0
ENSDARG00000036371	550445	ensembl_gene_id	D. rerio	59	H. sapiens	ACTA2	actin alpha 2, smooth muscle	GO:0090131 mesenchyme migration;GO:0072144 glomerular mesangial cell development;GO:0072008 glomerular mesangial cell differentiation		Disease related genes; Predicted intracellular proteins	Actin filaments (Supported)	Phenethyl Isothiocyanate	(M186)PID PDGFRB PATHWAY	(M5930)HALLMARK EPITHELIAL MESENCHYMAL TRANSITION	1.0	0.0	0.0	1.0	0.0	0.0	0.0	0.0	0.0	0.0	0.0	0.0	0.0	0.0	0.0	0.0	0.0	0.0	0.0	0.0
ENSDARG00000081423	100033630	ensembl_gene_id	D. rerio			None	None	None	None	None	None	None	None	None	nan	nan	nan	nan	nan	nan	nan	nan	nan	nan	nan	nan	nan	nan	nan	nan	nan	nan	nan	nan
ENSDARG00000099833	558097	ensembl_gene_id	D. rerio	25793	H. sapiens	FBXO7	F-box protein 7	GO:1903204 negative regulation of oxidative stress-induced neuron death;GO:1903599 positive regulation of autophagy of mitochondrion;GO:1903203 regulation of oxidative stress-induced neuron death		Disease related genes; Predicted intracellular proteins	Cytosol;Nucleoplasm (Supported)			(M5945)HALLMARK HEME METABOLISM	1.0	1.0	1.0	0.0	1.0	1.0	0.0	0.0	1.0	0.0	0.0	0.0	0.0	1.0	1.0	0.0	1.0	0.0	0.0	0.0
ENSDARG00000024314	565499	ensembl_gene_id	D. rerio	9709	H. sapiens	HERPUD1	homocysteine inducible ER protein with ubiquitin like domain 1	GO:1903071 positive regulation of ER-associated ubiquitin-dependent protein catabolic process;GO:1903069 regulation of ER-associated ubiquitin-dependent protein catabolic process;GO:1904294 positive regulation of ERAD pathway		Cancer-related genes; Predicted intracellular proteins	Cytosol;Plasma membrane (Uncertain)			(M5922)HALLMARK UNFOLDED PROTEIN RESPONSE	1.0	0.0	0.0	1.0	0.0	0.0	0.0	0.0	1.0	1.0	0.0	1.0	0.0	0.0	0.0	0.0	1.0	0.0	0.0	0.0
ENSDARG00000059360	100145909	ensembl_gene_id	D. rerio	6428	H. sapiens	SRSF3	serine and arginine rich splicing factor 3	GO:1990830 cellular response to leukemia inhibitory factor;GO:1990823 response to leukemia inhibitory factor;GO:0031124 mRNA 3'-end processing		Cancer-related genes; Predicted intracellular proteins	Nucleoplasm (Supported)			(M5926)HALLMARK MYC TARGETS V1	1.0	0.0	0.0	0.0	0.0	0.0	0.0	0.0	0.0	0.0	0.0	0.0	0.0	0.0	0.0	0.0	0.0	0.0	0.0	0.0
ENSDARG00000016132	321837	ensembl_gene_id	D. rerio	9817	H. sapiens	KEAP1	kelch like ECH associated protein 1	GO:0042994 cytoplasmic sequestering of transcription factor;GO:0051220 cytoplasmic sequestering of protein;GO:0071353 cellular response to interleukin-4		Cancer-related genes:Mutational cancer driver genes; Cancer-related genes:Mutated cancer genes; FDA approved drug targets:Small molecule drugs; Predicted intracellular proteins	Centriolar satellite;Nucleoplasm (Supported); Additional: Cytosol	Dimethyl fumarate			0.0	0.0	0.0	0.0	1.0	1.0	0.0	0.0	1.0	0.0	0.0	0.0	0.0	0.0	0.0	0.0	0.0	0.0	0.0	0.0
ENSDARG00000062794	406849	ensembl_gene_id	D. rerio	55521	H. sapiens	TRIM36	tripartite motif containing 36	GO:0007340 acrosome reaction;GO:0000281 mitotic cytokinesis;GO:0061640 cytoskeleton-dependent cytokinesis		Disease related genes; ENZYME proteins:Transferases; Enzymes; Potential drug targets; Predicted intracellular proteins	Cytosol;Nucleoplasm (Approved)				0.0	0.0	0.0	0.0	0.0	0.0	0.0	0.0	0.0	0.0	0.0	0.0	0.0	0.0	0.0	0.0	0.0	0.0	0.0	0.0
ENSDARG00000044684	335651	ensembl_gene_id	D. rerio			None	None	None	None	None	None	None	None	None	nan	nan	nan	nan	nan	nan	nan	nan	nan	nan	nan	nan	nan	nan	nan	nan	nan	nan	nan	nan
ENSDARG00000091631	560245	ensembl_gene_id	D. rerio			None	None	None	None	None	None	None	None	None	nan	nan	nan	nan	nan	nan	nan	nan	nan	nan	nan	nan	nan	nan	nan	nan	nan	nan	nan	nan
ENSDARG00000073874	415228	ensembl_gene_id	D. rerio	1415	H. sapiens	CRYBB2	crystallin beta B2	GO:0002088 lens development in camera-type eye;GO:0007601 visual perception;GO:0050953 sensory perception of light stimulus		Disease related genes; Predicted intracellular proteins	Nucleoplasm (Approved)				0.0	0.0	0.0	0.0	0.0	0.0	0.0	0.0	0.0	0.0	0.0	0.0	0.0	0.0	0.0	0.0	0.0	0.0	0.0	0.0
ENSDARG00000094910	572300	ensembl_gene_id	D. rerio			None	None	None	None	None	None	None	None	None	nan	nan	nan	nan	nan	nan	nan	nan	nan	nan	nan	nan	nan	nan	nan	nan	nan	nan	nan	nan
ENSDARG00000029533	445038	ensembl_gene_id	D. rerio	6141	H. sapiens	RPL18	ribosomal protein L18	GO:0002181 cytoplasmic translation;GO:0006614 SRP-dependent cotranslational protein targeting to membrane;GO:0006613 cotranslational protein targeting to membrane		Ribosomal proteins; Predicted intracellular proteins	Cytosol;Endoplasmic reticulum (Supported); Additional: Nucleoli	Artenimol		(M5926)HALLMARK MYC TARGETS V1; (M5939)HALLMARK P53 PATHWAY	1.0	0.0	0.0	0.0	0.0	0.0	0.0	0.0	0.0	0.0	0.0	0.0	0.0	0.0	0.0	0.0	0.0	0.0	0.0	0.0
ENSDARG00000031164	393664	ensembl_gene_id	D. rerio	7846	H. sapiens	TUBA1A	tubulin alpha 1a	GO:0097711 ciliary basal body-plasma membrane docking;GO:0140056 organelle localization by membrane tethering;GO:0022406 membrane docking		Cancer-related genes:Mutational cancer driver genes; Disease related genes; FDA approved drug targets:Small molecule drugs; Predicted intracellular proteins	Microtubules (Enhanced)	Albendazole; Vinblastine; Mebendazole; Epothilone D; Patupilone; CYT997; 2-MERCAPTO-N-[1,2,3,10-TETRAMETHOXY-9-OXO-5,6,7,9-TETRAHYDRO-BENZO[A]HEPTALEN-7-YL]ACETAMIDE; Artenimol; Phenethyl Isothiocyanate; Colchiceine	(M2579)ST DIFFERENTIATION PATHWAY IN PC12 CELLS; (M19)PID P73PATHWAY		1.0	0.0	1.0	0.0	0.0	0.0	0.0	0.0	0.0	0.0	0.0	0.0	0.0	0.0	0.0	0.0	0.0	1.0	0.0	0.0
ENSDARG00000070607	100093703	ensembl_gene_id	D. rerio	64979	H. sapiens	MRPL36	mitochondrial ribosomal protein L36	GO:0070125 mitochondrial translational elongation;GO:0070126 mitochondrial translational termination;GO:0006415 translational termination		Ribosomal proteins; Predicted intracellular proteins	Mitochondria;Nuclear bodies (Supported)				1.0	0.0	0.0	0.0	0.0	0.0	1.0	0.0	0.0	0.0	0.0	0.0	0.0	1.0	0.0	0.0	0.0	0.0	0.0	0.0
ENSDARG00000053301	323882	ensembl_gene_id	D. rerio	3642	H. sapiens	INSM1	INSM transcriptional repressor 1	GO:0061104 adrenal chromaffin cell differentiation;GO:0003358 noradrenergic neuron development;GO:0003357 noradrenergic neuron differentiation		Transcription factors:Zinc-coordinating DNA-binding domains; Predicted intracellular proteins				(M5957)HALLMARK PANCREAS BETA CELLS	0.0	0.0	0.0	1.0	0.0	0.0	0.0	0.0	0.0	0.0	0.0	0.0	0.0	0.0	0.0	0.0	0.0	0.0	0.0	0.0
ENSDARG00000039914	406367	ensembl_gene_id	D. rerio	26330	H. sapiens	GAPDHS	glyceraldehyde-3-phosphate dehydrogenase, spermatogenic	GO:0045821 positive regulation of glycolytic process;GO:0030813 positive regulation of nucleotide catabolic process;GO:0051197 positive regulation of coenzyme metabolic process		Enzymes; ENZYME proteins:Oxidoreductases; Predicted intracellular proteins	Nucleoplasm (Approved); Additional: Centrosome	NADH; Zinc; (+)-Rutamarin alcohol; N-naphthalen-1-ylmethyl-2'-[3,5-dimethoxybenzamido]-2'-deoxy-adenosine; 2'-Deoxy-2'-[(3,5-dimethoxybenzoyl)amino]-N-[(1R)-1,2,3,4-tetrahydro-1-naphthalenyl]adenosine; Artenimol; Zinc acetate; Zinc chloride; Zinc sulfate, unspecified form		(M5951)HALLMARK SPERMATOGENESIS; (M5935)HALLMARK FATTY ACID METABOLISM; (M5891)HALLMARK HYPOXIA	1.0	1.0	1.0	0.0	0.0	0.0	0.0	0.0	1.0	0.0	0.0	0.0	0.0	0.0	0.0	0.0	0.0	0.0	0.0	1.0
ENSDARG00000012387	406702	ensembl_gene_id	D. rerio	5160	H. sapiens	PDHA1	pyruvate dehydrogenase E1 subunit alpha 1	GO:0061732 mitochondrial acetyl-CoA biosynthetic process from pyruvate;GO:0006086 acetyl-CoA biosynthetic process from pyruvate;GO:0006085 acetyl-CoA biosynthetic process		ENZYME proteins:Oxidoreductases; Disease related genes; Enzymes; Citric acid cycle related proteins; Potential drug targets; Predicted intracellular proteins	Mitochondria (Supported)	NADH		(M5935)HALLMARK FATTY ACID METABOLISM; (M5936)HALLMARK OXIDATIVE PHOSPHORYLATION	1.0	1.0	1.0	0.0	0.0	0.0	0.0	0.0	0.0	0.0	1.0	0.0	0.0	0.0	0.0	0.0	0.0	0.0	0.0	1.0
ENSDARG00000030441	550531	ensembl_gene_id	D. rerio	5464	H. sapiens	PPA1	inorganic pyrophosphatase 1	GO:0071344 diphosphate metabolic process;GO:0006418 tRNA aminoacylation for protein translation;GO:0043039 tRNA aminoacylation		Enzymes; Predicted intracellular proteins; ENZYME proteins:Hydrolases	Vesicles (Supported)			(M5924)HALLMARK MTORC1 SIGNALING	1.0	1.0	0.0	0.0	0.0	0.0	1.0	0.0	0.0	0.0	0.0	0.0	0.0	0.0	0.0	0.0	0.0	0.0	0.0	0.0
ENSDARG00000098250						None	None	None	None	None	None	None	None	None	nan	nan	nan	nan	nan	nan	nan	nan	nan	nan	nan	nan	nan	nan	nan	nan	nan	nan	nan	nan
ENSDARG00000091655	541329	ensembl_gene_id	D. rerio	2653	H. sapiens	GCSH	glycine cleavage system protein H	GO:0006546 glycine catabolic process;GO:0019464 glycine decarboxylation via glycine cleavage system;GO:0009249 protein lipoylation		Disease related genes; Predicted intracellular proteins	Vesicles (Approved)	6-(Hydroxyethyldithio)-8-(Aminomethylthio)Octanoic Acid; Dihydrolipoic Acid			1.0	0.0	0.0	0.0	0.0	0.0	0.0	0.0	0.0	0.0	0.0	0.0	0.0	0.0	0.0	0.0	0.0	0.0	0.0	0.0
ENSDARG00000045850	556080	ensembl_gene_id	D. rerio			None	None	None	None	None	None	None	None	None	nan	nan	nan	nan	nan	nan	nan	nan	nan	nan	nan	nan	nan	nan	nan	nan	nan	nan	nan	nan
ENSDARG00000030053	560745	ensembl_gene_id	D. rerio	1936	H. sapiens	EEF1D	eukaryotic translation elongation factor 1 delta	GO:0071479 cellular response to ionizing radiation;GO:0006414 translational elongation;GO:0010212 response to ionizing radiation		Predicted intracellular proteins	Nucleoli fibrillar center;Nucleoplasm (Supported)				1.0	0.0	0.0	0.0	0.0	0.0	0.0	0.0	0.0	1.0	0.0	0.0	0.0	1.0	0.0	0.0	0.0	0.0	0.0	0.0
ENSDARG00000037402	436860	ensembl_gene_id	D. rerio	3982	H. sapiens	LIM2	lens intrinsic membrane protein 2	GO:0002088 lens development in camera-type eye;GO:0007043 cell-cell junction assembly;GO:0045216 cell-cell junction organization		Disease related genes					0.0	0.0	0.0	0.0	0.0	0.0	0.0	0.0	0.0	0.0	0.0	0.0	0.0	0.0	0.0	0.0	0.0	0.0	0.0	0.0
ENSDARG00000019230	337010	ensembl_gene_id	D. rerio	6130	H. sapiens	RPL7A	ribosomal protein L7a	GO:0000470 maturation of LSU-rRNA;GO:0042273 ribosomal large subunit biogenesis;GO:0006614 SRP-dependent cotranslational protein targeting to membrane		Disease related genes; Ribosomal proteins; Predicted intracellular proteins	Nucleoli (Approved); Additional: Vesicles				1.0	0.0	0.0	0.0	0.0	0.0	1.0	0.0	0.0	0.0	0.0	0.0	0.0	0.0	0.0	0.0	0.0	0.0	0.0	0.0
ENSDARG00000042056	794129	ensembl_gene_id	D. rerio	23383	H. sapiens	MAU2	MAU2 sister chromatid cohesion factor	GO:0071921 cohesin loading;GO:0034085 establishment of sister chromatid cohesion;GO:0034086 maintenance of sister chromatid cohesion		Predicted intracellular proteins	Nucleoplasm (Supported); Additional: Nuclear bodies				0.0	0.0	0.0	0.0	0.0	0.0	0.0	0.0	0.0	0.0	0.0	0.0	0.0	0.0	0.0	0.0	0.0	0.0	0.0	0.0
ENSDARG00000004261	613145	ensembl_gene_id	D. rerio	54732	H. sapiens	TMED9	transmembrane p24 trafficking protein 9	GO:0035964 COPI-coated vesicle budding;GO:0048200 Golgi transport vesicle coating;GO:0048205 COPI coating of Golgi vesicle							0.0	0.0	0.0	0.0	0.0	0.0	0.0	0.0	0.0	0.0	0.0	0.0	0.0	0.0	0.0	0.0	0.0	0.0	0.0	0.0
ENSDARG00000036282	791890	ensembl_gene_id	D. rerio	8635	H. sapiens	RNASET2	ribonuclease T2	GO:0090502 RNA phosphodiester bond hydrolysis, endonucleolytic;GO:0090501 RNA phosphodiester bond hydrolysis;GO:0090305 nucleic acid phosphodiester bond hydrolysis		Disease related genes; Predicted secreted proteins; Predicted intracellular proteins					1.0	0.0	0.0	0.0	0.0	0.0	0.0	0.0	0.0	0.0	0.0	0.0	0.0	0.0	0.0	0.0	0.0	0.0	0.0	0.0
ENSDARG00000013685	564423	ensembl_gene_id	D. rerio			None	None	None	None	None	None	None	None	None	nan	nan	nan	nan	nan	nan	nan	nan	nan	nan	nan	nan	nan	nan	nan	nan	nan	nan	nan	nan
ENSDARG00000045402	494135	ensembl_gene_id	D. rerio	23412	H. sapiens	COMMD3	COMM domain containing 3	GO:0006814 sodium ion transport;GO:0043312 neutrophil degranulation;GO:0002283 neutrophil activation involved in immune response		Predicted intracellular proteins					0.0	0.0	1.0	0.0	0.0	0.0	0.0	0.0	0.0	0.0	0.0	0.0	0.0	0.0	0.0	0.0	0.0	0.0	0.0	0.0
ENSDARG00000021838	100000341	ensembl_gene_id	D. rerio	6228	H. sapiens	RPS23	ribosomal protein S23	GO:1990145 maintenance of translational fidelity;GO:0034063 stress granule assembly;GO:0002181 cytoplasmic translation		Disease related genes; Ribosomal proteins; Predicted intracellular proteins	Cytosol;Endoplasmic reticulum (Enhanced)				1.0	0.0	0.0	0.0	0.0	0.0	1.0	0.0	0.0	0.0	0.0	0.0	0.0	0.0	0.0	0.0	0.0	0.0	0.0	0.0
ENSDARG00000037203						None	None	None	None	None	None	None	None	None	nan	nan	nan	nan	nan	nan	nan	nan	nan	nan	nan	nan	nan	nan	nan	nan	nan	nan	nan	nan
ENSDARG00000045296	393820	ensembl_gene_id	D. rerio	150678	H. sapiens	COPS9	COP9 signalosome subunit 9	GO:2000435 negative regulation of protein neddylation;GO:2000434 regulation of protein neddylation;GO:0045116 protein neddylation		Predicted intracellular proteins	Cytosol;Nucleoplasm (Approved)				0.0	0.0	0.0	0.0	0.0	0.0	0.0	0.0	0.0	1.0	0.0	0.0	0.0	0.0	0.0	0.0	0.0	0.0	0.0	0.0
ENSDARG00000098600	404606	ensembl_gene_id	D. rerio	57095	H. sapiens	PITHD1	PITH domain containing 1	GO:0061956 penetration of cumulus oophorus;GO:0007341 penetration of zona pellucida;GO:0045654 positive regulation of megakaryocyte differentiation		Predicted intracellular proteins					0.0	0.0	0.0	0.0	0.0	0.0	0.0	0.0	1.0	0.0	0.0	0.0	0.0	0.0	0.0	0.0	0.0	0.0	0.0	0.0
ENSDARG00000034427	321880	ensembl_gene_id	D. rerio	90861	H. sapiens	JPT2	Jupiter microtubule associated homolog 2			Predicted intracellular proteins	Cytosol;Plasma membrane (Enhanced)				0.0	0.0	0.0	0.0	0.0	0.0	0.0	0.0	0.0	0.0	0.0	0.0	0.0	0.0	0.0	0.0	0.0	0.0	0.0	0.0
ENSDARG00000043371	406405	ensembl_gene_id	D. rerio	4191	H. sapiens	MDH2	malate dehydrogenase 2	GO:0006108 malate metabolic process;GO:0006107 oxaloacetate metabolic process;GO:0006099 tricarboxylic acid cycle		ENZYME proteins:Oxidoreductases; Disease related genes; Enzymes; FDA approved drug targets:Small molecule drugs; Citric acid cycle related proteins; Predicted intracellular proteins	Mitochondria (Enhanced)	NADH; Citric acid; Xanthinol		(M5935)HALLMARK FATTY ACID METABOLISM; (M5905)HALLMARK ADIPOGENESIS; (M5936)HALLMARK OXIDATIVE PHOSPHORYLATION	0.0	1.0	0.0	0.0	0.0	0.0	0.0	0.0	0.0	0.0	1.0	0.0	0.0	0.0	0.0	0.0	0.0	0.0	0.0	0.0
ENSDARG00000052840	573689	ensembl_gene_id	D. rerio	4724	H. sapiens	NDUFS4	NADH:ubiquinone oxidoreductase subunit S4	GO:0048146 positive regulation of fibroblast proliferation;GO:0006120 mitochondrial electron transport, NADH to ubiquinone;GO:0010257 NADH dehydrogenase complex assembly		Disease related genes; Predicted intracellular proteins	Mitochondria (Supported)	NADH		(M5936)HALLMARK OXIDATIVE PHOSPHORYLATION	0.0	1.0	0.0	0.0	0.0	0.0	0.0	1.0	0.0	0.0	0.0	0.0	0.0	0.0	0.0	0.0	0.0	0.0	0.0	0.0
ENSDARG00000009844	323834	ensembl_gene_id	D. rerio	54935	H. sapiens	DUSP23	dual specificity phosphatase 23	GO:0035335 peptidyl-tyrosine dephosphorylation;GO:0006470 protein dephosphorylation;GO:0016311 dephosphorylation		Enzymes; Predicted intracellular proteins; ENZYME proteins:Hydrolases	Nucleoplasm (Supported)	4-Nitrophenyl Phosphate			0.0	0.0	0.0	0.0	0.0	0.0	0.0	0.0	0.0	0.0	0.0	0.0	0.0	0.0	0.0	0.0	0.0	0.0	0.0	0.0
ENSDARG00000020298	30079	ensembl_gene_id	D. rerio	7832	H. sapiens	BTG2	BTG anti-proliferation factor 2	GO:0060213 positive regulation of nuclear-transcribed mRNA poly(A) tail shortening;GO:0021542 dentate gyrus development;GO:0060211 regulation of nuclear-transcribed mRNA poly(A) tail shortening		Predicted intracellular proteins; Cancer-related genes:Candidate cancer biomarkers	Vesicles (Approved); Additional: Nucleoplasm		(M145)PID P53 DOWNSTREAM PATHWAY	(M5941)HALLMARK UV RESPONSE UP; (M5902)HALLMARK APOPTOSIS; (M5890)HALLMARK TNFA SIGNALING VIA NFKB	1.0	0.0	0.0	0.0	0.0	0.0	0.0	0.0	1.0	0.0	1.0	0.0	0.0	0.0	0.0	1.0	0.0	0.0	0.0	0.0
ENSDARG00000057789	677744	ensembl_gene_id	D. rerio	119180	H. sapiens	LYZL2	lysozyme like 2	GO:0008152 metabolic process;GO:0008150 biological_process		Enzymes; Predicted secreted proteins; ENZYME proteins:Hydrolases					0.0	0.0	0.0	0.0	0.0	0.0	0.0	0.0	0.0	0.0	0.0	0.0	0.0	0.0	0.0	0.0	0.0	0.0	0.0	0.0
ENSDARG00000053862	335789	ensembl_gene_id	D. rerio	1418	H. sapiens	CRYGA	crystallin gamma A	GO:0002088 lens development in camera-type eye;GO:0007601 visual perception;GO:0050953 sensory perception of light stimulus		Predicted intracellular proteins	Cytosol;Vesicles (Uncertain)				0.0	0.0	0.0	0.0	0.0	0.0	0.0	0.0	0.0	0.0	0.0	0.0	0.0	0.0	0.0	0.0	0.0	0.0	0.0	0.0
ENSDARG00000023298	554155	ensembl_gene_id	D. rerio	6232	H. sapiens	RPS27	ribosomal protein S27	GO:0000028 ribosomal small subunit assembly;GO:0042255 ribosome assembly;GO:0042274 ribosomal small subunit biogenesis		Disease related genes; Ribosomal proteins; Predicted intracellular proteins	Cytosol;Endoplasmic reticulum (Approved); Additional: Nucleoli				1.0	0.0	0.0	0.0	0.0	0.0	1.0	0.0	0.0	0.0	0.0	0.0	0.0	0.0	0.0	0.0	0.0	0.0	0.0	0.0
ENSDARG00000069831						None	None	None	None	None	None	None	None	None	nan	nan	nan	nan	nan	nan	nan	nan	nan	nan	nan	nan	nan	nan	nan	nan	nan	nan	nan	nan
ENSDARG00000012987	246094	ensembl_gene_id	D. rerio	2821	H. sapiens	GPI	glucose-6-phosphate isomerase	GO:0051156 glucose 6-phosphate metabolic process;GO:0006735 NADH regeneration;GO:0061621 canonical glycolysis		Disease related genes; Enzymes; ENZYME proteins:Isomerase; Predicted secreted proteins; Potential drug targets; Cancer-related genes:Candidate cancer biomarkers; Predicted intracellular proteins	Cytosol;Plasma membrane (Supported); Additional: Nucleoplasm	alpha-D-glucose 6-phosphate; 6-phospho-D-gluconic acid; 5-phospho-D-arabinohydroxamic acid; D-glucitol 6-phosphate; 5-Phosphoarabinonic Acid; Glucose-6-Phosphate; D-erythrose 4-phosphate; Fructose-6-phosphate; Copper; Artenimol		(M5891)HALLMARK HYPOXIA; (M5924)HALLMARK MTORC1 SIGNALING; (M5936)HALLMARK OXIDATIVE PHOSPHORYLATION	1.0	1.0	1.0	1.0	0.0	0.0	0.0	0.0	0.0	0.0	1.0	0.0	0.0	0.0	0.0	0.0	0.0	0.0	0.0	1.0
ENSDARG00000104945	393944	ensembl_gene_id	D. rerio	6620	H. sapiens	SNCB	synuclein beta	GO:0042417 dopamine metabolic process;GO:0006584 catecholamine metabolic process;GO:0009712 catechol-containing compound metabolic process		Transporters:Transporter channels and pores; Predicted intracellular proteins				(M5956)HALLMARK KRAS SIGNALING DN	1.0	0.0	0.0	0.0	1.0	0.0	0.0	0.0	0.0	0.0	0.0	0.0	0.0	0.0	0.0	1.0	0.0	0.0	0.0	0.0
ENSDARG00000093688	100535107	ensembl_gene_id	D. rerio			None	None	None	None	None	None	None	None	None	nan	nan	nan	nan	nan	nan	nan	nan	nan	nan	nan	nan	nan	nan	nan	nan	nan	nan	nan	nan
ENSDARG00000078134	558389	ensembl_gene_id	D. rerio			None	None	None	None	None	None	None	None	None	nan	nan	nan	nan	nan	nan	nan	nan	nan	nan	nan	nan	nan	nan	nan	nan	nan	nan	nan	nan
ENSDARG00000057676	798622	ensembl_gene_id	D. rerio	51125	H. sapiens	GOLGA7	golgin A7	GO:0018230 peptidyl-L-cysteine S-palmitoylation;GO:0018231 peptidyl-S-diacylglycerol-L-cysteine biosynthetic process from peptidyl-cysteine;GO:0018345 protein palmitoylation		Predicted intracellular proteins; Transporters					1.0	0.0	0.0	0.0	0.0	0.0	0.0	0.0	0.0	0.0	0.0	0.0	0.0	0.0	1.0	0.0	0.0	0.0	0.0	0.0
ENSDARG00000041232	405889	ensembl_gene_id	D. rerio	6235	H. sapiens	RPS29	ribosomal protein S29	GO:0002181 cytoplasmic translation;GO:0006614 SRP-dependent cotranslational protein targeting to membrane;GO:0006613 cotranslational protein targeting to membrane		Disease related genes; Ribosomal proteins; Predicted intracellular proteins	Cytosol;Endoplasmic reticulum (Supported)				1.0	0.0	0.0	0.0	0.0	0.0	0.0	0.0	0.0	0.0	0.0	0.0	0.0	0.0	0.0	0.0	0.0	0.0	0.0	0.0
ENSDARG00000044562	415158	ensembl_gene_id	D. rerio	54205	H. sapiens	CYCS	cytochrome c, somatic	GO:0008635 activation of cysteine-type endopeptidase activity involved in apoptotic process by cytochrome c;GO:0006122 mitochondrial electron transport, ubiquinol to cytochrome c;GO:0006123 mitochondrial electron transport, cytochrome c to oxygen		Disease related genes; Predicted intracellular proteins	Mitochondria (Supported)	Minocycline; Protoporphyrin Ix Containing Co; Ferroheme C; Imidazole; Protoporphyrin Ix Containing Zn; Trimethyllysine; Zinc Substituted Heme C; Artenimol	(M197)PID HIV NEF PATHWAY; (M144)PID CERAMIDE PATHWAY; (M220)PID CASPASE PATHWAY	(M5936)HALLMARK OXIDATIVE PHOSPHORYLATION	1.0	1.0	1.0	1.0	1.0	0.0	0.0	0.0	0.0	0.0	1.0	0.0	0.0	0.0	0.0	0.0	0.0	0.0	0.0	0.0
ENSDARG00000036784	445183	ensembl_gene_id	D. rerio	149951	H. sapiens	COMMD7	COMM domain containing 7	GO:0032088 negative regulation of NF-kappaB transcription factor activity;GO:0033209 tumor necrosis factor-mediated signaling pathway;GO:0043433 negative regulation of DNA-binding transcription factor activity		Predicted intracellular proteins	Vesicles (Approved)				0.0	0.0	0.0	0.0	0.0	0.0	0.0	0.0	0.0	0.0	0.0	0.0	0.0	0.0	0.0	0.0	0.0	0.0	0.0	0.0
ENSDARG00000090697	325102	ensembl_gene_id	D. rerio	3646	H. sapiens	EIF3E	eukaryotic translation initiation factor 3 subunit E	GO:1902416 positive regulation of mRNA binding;GO:1905216 positive regulation of RNA binding;GO:1902415 regulation of mRNA binding		Cancer-related genes; Predicted intracellular proteins	Cytosol (Supported)		(M44)PID HIF2PATHWAY		1.0	0.0	0.0	0.0	0.0	0.0	1.0	0.0	0.0	0.0	0.0	0.0	0.0	0.0	0.0	0.0	0.0	0.0	0.0	0.0
ENSDARG00000060029	777718	ensembl_gene_id	D. rerio	64760	H. sapiens	FHIP2B	FHF complex subunit HOOK interacting protein 2B			Predicted intracellular proteins	Nucleoplasm (Approved); Additional: Cytosol				0.0	0.0	0.0	0.0	0.0	0.0	0.0	0.0	0.0	0.0	0.0	0.0	0.0	0.0	0.0	0.0	0.0	0.0	0.0	0.0
ENSDARG00000053875	436859	ensembl_gene_id	D. rerio			None	None	None	None	None	None	None	None	None	nan	nan	nan	nan	nan	nan	nan	nan	nan	nan	nan	nan	nan	nan	nan	nan	nan	nan	nan	nan
ENSDARG00000070083	554135	ensembl_gene_id	D. rerio	506	H. sapiens	ATP5F1B	ATP synthase F1 subunit beta	GO:0006933 negative regulation of cell adhesion involved in substrate-bound cell migration;GO:0042776 mitochondrial ATP synthesis coupled proton transport;GO:0006929 substrate-dependent cell migration		Enzymes; Predicted intracellular proteins; ENZYME proteins:Hydrolases	Mitochondria (Enhanced)	Quercetin; 1-ACETYL-2-CARBOXYPIPERIDINE; AUROVERTIN B; Piceatannol; N1-(2-AMINO-4-METHYLPENTYL)OCTAHYDRO-PYRROLO[1,2-A] PYRIMIDINE; Phenethyl Isothiocyanate		(M5936)HALLMARK OXIDATIVE PHOSPHORYLATION	0.0	1.0	1.0	1.0	0.0	0.0	0.0	0.0	0.0	0.0	0.0	1.0	0.0	0.0	0.0	0.0	0.0	0.0	0.0	0.0
ENSDARG00000082131	100033623	ensembl_gene_id	D. rerio			None	None	None	None	None	None	None	None	None	nan	nan	nan	nan	nan	nan	nan	nan	nan	nan	nan	nan	nan	nan	nan	nan	nan	nan	nan	nan
ENSDARG00000046157	541327	ensembl_gene_id	D. rerio	6218	H. sapiens	RPS17	ribosomal protein S17	GO:0042274 ribosomal small subunit biogenesis;GO:0006614 SRP-dependent cotranslational protein targeting to membrane;GO:0006613 cotranslational protein targeting to membrane		Disease related genes; Ribosomal proteins; Predicted intracellular proteins	Cytosol;Endoplasmic reticulum (Approved); Additional: Nucleoli	Artenimol			1.0	0.0	0.0	0.0	0.0	0.0	1.0	0.0	0.0	0.0	0.0	0.0	0.0	0.0	0.0	0.0	0.0	0.0	0.0	0.0
ENSDARG00000008735	406296	ensembl_gene_id	D. rerio	10159	H. sapiens	ATP6AP2	ATPase H+ transporting accessory protein 2	GO:0021626 central nervous system maturation;GO:0032914 positive regulation of transforming growth factor beta1 production;GO:0048069 eye pigmentation		Predicted intracellular proteins; Disease related genes; Transporters:Accessory Factors Involved in Transport; Potential drug targets			(M77)PID WNT SIGNALING PATHWAY		0.0	1.0	0.0	0.0	0.0	0.0	0.0	0.0	0.0	0.0	0.0	1.0	0.0	0.0	0.0	0.0	1.0	0.0	0.0	0.0
ENSDARG00000056085	445045	ensembl_gene_id	D. rerio	25843	H. sapiens	MOB4	MOB family member 4, phocein			Predicted intracellular proteins					0.0	0.0	0.0	0.0	0.0	0.0	0.0	0.0	0.0	0.0	0.0	0.0	0.0	0.0	0.0	0.0	0.0	0.0	0.0	0.0
ENSDARG00000076283	327011	ensembl_gene_id	D. rerio	6634	H. sapiens	SNRPD3	small nuclear ribonucleoprotein D3 polypeptide	GO:0008334 histone mRNA metabolic process;GO:0006369 termination of RNA polymerase II transcription;GO:0000387 spliceosomal snRNP assembly		Predicted intracellular proteins	Nucleoplasm (Supported); Additional: Cytosol;Nuclear bodies			(M5926)HALLMARK MYC TARGETS V1	1.0	0.0	0.0	0.0	0.0	0.0	1.0	0.0	0.0	0.0	0.0	0.0	0.0	0.0	0.0	0.0	0.0	0.0	0.0	0.0
ENSDARG00000018600	325922	ensembl_gene_id	D. rerio	54884	H. sapiens	RETSAT	retinol saturase	GO:0042572 retinol metabolic process;GO:0034308 primary alcohol metabolic process;GO:0001523 retinoid metabolic process		Enzymes; ENZYME proteins:Oxidoreductases; Predicted intracellular proteins	Nucleoli (Uncertain)	Vitamin A		(M5949)HALLMARK PEROXISOME; (M5948)HALLMARK BILE ACID METABOLISM; (M5935)HALLMARK FATTY ACID METABOLISM	0.0	0.0	0.0	0.0	0.0	0.0	0.0	0.0	0.0	0.0	0.0	0.0	0.0	0.0	0.0	0.0	0.0	0.0	0.0	0.0
ENSDARG00000041332	327214	ensembl_gene_id	D. rerio	55161	H. sapiens	TMEM33	transmembrane protein 33	GO:1903899 positive regulation of PERK-mediated unfolded protein response;GO:1903371 regulation of endoplasmic reticulum tubular network organization;GO:1903896 positive regulation of IRE1-mediated unfolded protein response		Transporters					0.0	0.0	0.0	0.0	0.0	0.0	0.0	0.0	0.0	0.0	0.0	0.0	0.0	0.0	0.0	0.0	1.0	0.0	0.0	0.0
ENSDARG00000095273	557348	ensembl_gene_id	D. rerio	1351	H. sapiens	COX8A	cytochrome c oxidase subunit 8A	GO:0006123 mitochondrial electron transport, cytochrome c to oxygen;GO:0019646 aerobic electron transport chain;GO:0009060 aerobic respiration		Transporters:Primary Active Transporters		Cholic Acid; N-Formylmethionine		(M5905)HALLMARK ADIPOGENESIS; (M5936)HALLMARK OXIDATIVE PHOSPHORYLATION	0.0	1.0	1.0	0.0	0.0	0.0	0.0	0.0	0.0	0.0	1.0	0.0	0.0	0.0	0.0	0.0	0.0	0.0	0.0	0.0
ENSDARG00000031776	436651	ensembl_gene_id	D. rerio	94033	H. sapiens	FTMT	ferritin mitochondrial	GO:1904229 regulation of succinate dehydrogenase activity;GO:1904231 positive regulation of succinate dehydrogenase activity;GO:1904234 positive regulation of aconitate hydratase activity		Enzymes; ENZYME proteins:Oxidoreductases; Predicted intracellular proteins					0.0	0.0	0.0	0.0	0.0	0.0	0.0	0.0	0.0	0.0	0.0	1.0	0.0	0.0	0.0	0.0	0.0	0.0	0.0	0.0
ENSDARG00000076978	100216485	ensembl_gene_id	D. rerio	5367	H. sapiens	PMCH	pro-melanin concentrating hormone	GO:0007631 feeding behavior;GO:0007218 neuropeptide signaling pathway;GO:0007610 behavior		Predicted secreted proteins					0.0	0.0	0.0	0.0	0.0	0.0	0.0	0.0	0.0	0.0	0.0	0.0	0.0	0.0	0.0	1.0	0.0	0.0	0.0	0.0
ENSDARG00000010553	402891	ensembl_gene_id	D. rerio	93380	H. sapiens	MMGT1	membrane magnesium transporter 1	GO:0006824 cobalt ion transport;GO:0045050 protein insertion into ER membrane by stop-transfer membrane-anchor sequence;GO:0071816 tail-anchored membrane protein insertion into ER membrane		Transporters:Primary Active Transporters					1.0	0.0	1.0	0.0	0.0	0.0	0.0	0.0	0.0	0.0	0.0	0.0	0.0	0.0	0.0	0.0	0.0	0.0	0.0	0.0
ENSDARG00000095553	100002665	ensembl_gene_id	D. rerio	55891	H. sapiens	LENEP	lens epithelial protein	GO:0007275 multicellular organism development;GO:0048856 anatomical structure development;GO:0032502 developmental process		Predicted intracellular proteins					0.0	0.0	0.0	0.0	0.0	0.0	0.0	0.0	0.0	0.0	0.0	0.0	0.0	0.0	0.0	0.0	0.0	0.0	0.0	0.0
ENSDARG00000103712	402958	ensembl_gene_id	D. rerio	84814	H. sapiens	PLPP7	phospholipid phosphatase 7 (inactive)	GO:0010832 negative regulation of myotube differentiation;GO:0051154 negative regulation of striated muscle cell differentiation;GO:0010830 regulation of myotube differentiation		Predicted intracellular proteins	Vesicles (Approved); Additional: Nucleoplasm				0.0	0.0	0.0	0.0	0.0	0.0	0.0	0.0	0.0	0.0	0.0	0.0	0.0	0.0	0.0	0.0	0.0	0.0	0.0	0.0
ENSDARG00000089877	566718	ensembl_gene_id	D. rerio	401115	H. sapiens	C4orf48	chromosome 4 open reading frame 48			Predicted secreted proteins	Cytosol (Approved)				0.0	0.0	0.0	0.0	0.0	0.0	0.0	0.0	0.0	0.0	0.0	0.0	0.0	0.0	0.0	0.0	0.0	0.0	0.0	0.0
ENSDARG00000104149	325358	ensembl_gene_id	D. rerio	10670	H. sapiens	RRAGA	Ras related GTP binding A	GO:1904263 positive regulation of TORC1 signaling;GO:0019048 modulation by virus of host morphology or physiology;GO:1903432 regulation of TORC1 signaling		Predicted intracellular proteins	Golgi apparatus;Vesicles (Approved)		(M121)PID MTOR 4PATHWAY		1.0	0.0	0.0	0.0	0.0	1.0	0.0	0.0	0.0	0.0	1.0	0.0	0.0	0.0	0.0	0.0	0.0	0.0	1.0	0.0
ENSDARG00000015422	558042	ensembl_gene_id	D. rerio	51645	H. sapiens	PPIL1	peptidylprolyl isomerase like 1	GO:0000413 protein peptidyl-prolyl isomerization;GO:0018208 peptidyl-proline modification;GO:0006457 protein folding		ENZYME proteins:Isomerase; Enzymes; Predicted intracellular proteins	Nucleoli (Supported)				1.0	0.0	0.0	0.0	0.0	0.0	0.0	0.0	0.0	0.0	0.0	0.0	0.0	0.0	0.0	0.0	0.0	0.0	0.0	0.0
ENSDARG00000018903	406647	ensembl_gene_id	D. rerio	7965	H. sapiens	AIMP2	aminoacyl tRNA synthetase complex interacting multifunctional protein 2	GO:1903632 positive regulation of aminoacyl-tRNA ligase activity;GO:1903630 regulation of aminoacyl-tRNA ligase activity;GO:0060510 type II pneumocyte differentiation		Predicted intracellular proteins	Cytosol (Approved)			(M5928)HALLMARK MYC TARGETS V2; (M5926)HALLMARK MYC TARGETS V1	1.0	0.0	0.0	0.0	0.0	0.0	1.0	0.0	0.0	1.0	0.0	0.0	0.0	0.0	0.0	0.0	0.0	0.0	0.0	0.0
ENSDARG00000034753	565579	ensembl_gene_id	D. rerio	10099	H. sapiens	TSPAN3	tetraspanin 3	GO:0008150 biological_process		Transporters:Accessory Factors Involved in Transport; Predicted intracellular proteins	Golgi apparatus;Nucleoplasm (Approved)				0.0	0.0	0.0	0.0	0.0	0.0	0.0	0.0	0.0	0.0	0.0	0.0	0.0	0.0	0.0	0.0	0.0	0.0	0.0	0.0
ENSDARG00000035860	406307	ensembl_gene_id	D. rerio	6234	H. sapiens	RPS28	ribosomal protein S28	GO:0000028 ribosomal small subunit assembly;GO:0030490 maturation of SSU-rRNA;GO:0042255 ribosome assembly		Disease related genes; Ribosomal proteins; Predicted intracellular proteins	Cytosol (Approved)	Artenimol			1.0	0.0	0.0	0.0	0.0	0.0	1.0	0.0	0.0	0.0	0.0	0.0	0.0	0.0	0.0	0.0	0.0	0.0	0.0	0.0
ENSDARG00000043402	564733	ensembl_gene_id	D. rerio	128308	H. sapiens	MRPL55	mitochondrial ribosomal protein L55	GO:0070125 mitochondrial translational elongation;GO:0070126 mitochondrial translational termination;GO:0006415 translational termination		Ribosomal proteins; Predicted intracellular proteins					1.0	0.0	0.0	0.0	0.0	0.0	0.0	0.0	0.0	0.0	0.0	0.0	0.0	1.0	0.0	0.0	0.0	0.0	0.0	0.0
ENSDARG00000007359	393270	ensembl_gene_id	D. rerio	8266	H. sapiens	UBL4A	ubiquitin like 4A	GO:0071816 tail-anchored membrane protein insertion into ER membrane;GO:0045048 protein insertion into ER membrane;GO:0051205 protein insertion into membrane		Predicted intracellular proteins	Cytosol;Nucleoplasm (Supported)				1.0	0.0	0.0	0.0	0.0	0.0	0.0	0.0	0.0	0.0	0.0	0.0	0.0	0.0	0.0	0.0	0.0	0.0	0.0	0.0
ENSDARG00000070849	337148	ensembl_gene_id	D. rerio	6209	H. sapiens	RPS15	ribosomal protein S15	GO:0000056 ribosomal small subunit export from nucleus;GO:0000054 ribosomal subunit export from nucleus;GO:0033750 ribosome localization		Ribosomal proteins; Cancer-related genes:Mutated cancer genes; Predicted intracellular proteins	Cytosol;Endoplasmic reticulum (Approved)				1.0	0.0	0.0	0.0	0.0	0.0	1.0	0.0	0.0	0.0	0.0	0.0	0.0	0.0	0.0	0.0	0.0	0.0	0.0	0.0
ENSDARG00000092488	100536128	ensembl_gene_id	D. rerio	23351	H. sapiens	KHNYN	KH and NYN domain containing	GO:0090502 RNA phosphodiester bond hydrolysis, endonucleolytic;GO:0090501 RNA phosphodiester bond hydrolysis;GO:0090305 nucleic acid phosphodiester bond hydrolysis		Predicted intracellular proteins	Nucleoplasm (Approved); Additional: Cytosol			(M5945)HALLMARK HEME METABOLISM	0.0	0.0	0.0	0.0	0.0	0.0	0.0	0.0	0.0	0.0	0.0	0.0	0.0	0.0	0.0	0.0	0.0	0.0	0.0	0.0
ENSDARG00000099381						None	None	None	None	None	None	None	None	None	nan	nan	nan	nan	nan	nan	nan	nan	nan	nan	nan	nan	nan	nan	nan	nan	nan	nan	nan	nan
ENSDARG00000090804	100535239	ensembl_gene_id	D. rerio	151556	H. sapiens	GPR155	G protein-coupled receptor 155	GO:0050890 cognition;GO:0050877 nervous system process;GO:0055085 transmembrane transport			Cytosol;Nuclear bodies (Approved)				0.0	0.0	0.0	0.0	0.0	0.0	0.0	0.0	0.0	0.0	0.0	0.0	0.0	0.0	0.0	0.0	0.0	0.0	0.0	0.0
ENSDARG00000092123	556245	ensembl_gene_id	D. rerio			None	None	None	None	None	None	None	None	None	nan	nan	nan	nan	nan	nan	nan	nan	nan	nan	nan	nan	nan	nan	nan	nan	nan	nan	nan	nan
ENSDARG00000004539	246227	ensembl_gene_id	D. rerio	5743	H. sapiens	PTGS2	prostaglandin-endoperoxide synthase 2	GO:0090362 positive regulation of platelet-derived growth factor production;GO:0090360 platelet-derived growth factor production;GO:0090361 regulation of platelet-derived growth factor production		ENZYME proteins:Oxidoreductases; Enzymes; FDA approved drug targets:Small molecule drugs; Cancer-related genes:Candidate cancer biomarkers; Predicted intracellular proteins	Endoplasmic reticulum (Supported)	Dihomo-gamma-linolenic acid; Icosapent; Aminosalicylic acid; Mesalazine; Acetaminophen; Indomethacin; Nabumetone; Ketorolac; Tenoxicam; Lenalidomide; Celecoxib; Tolmetin; Rofecoxib; Piroxicam; Fenoprofen; Valdecoxib; Diclofenac; Sulindac; Flurbiprofen; Etodolac; Mefenamic acid; Naproxen; Sulfasalazine; Phenylbutazone; Meloxicam; Carprofen; Diflunisal; Suprofen; Salicylic acid; Meclofenamic acid; …	(M103)PID S1P S1P1 PATHWAY; (M235)PID TCR CALCIUM PATHWAY; (M229)PID P38 ALPHA BETA DOWNSTREAM PATHWAY	(M5890)HALLMARK TNFA SIGNALING VIA NFKB; (M5913)HALLMARK INTERFERON GAMMA RESPONSE; (M5953)HALLMARK KRAS SIGNALING UP	0.0	1.0	1.0	1.0	1.0	0.0	0.0	0.0	0.0	0.0	1.0	0.0	0.0	0.0	0.0	0.0	0.0	0.0	0.0	1.0
ENSDARG00000104869	100332622	ensembl_gene_id	D. rerio	166378	H. sapiens	SPATA5	spermatogenesis associated 5	GO:0007283 spermatogenesis;GO:0048232 male gamete generation;GO:0007276 gamete generation		Disease related genes; Predicted intracellular proteins	Cytosol (Approved)				0.0	0.0	0.0	0.0	0.0	0.0	0.0	0.0	0.0	0.0	0.0	0.0	0.0	0.0	0.0	0.0	0.0	0.0	0.0	0.0
ENSDARG00000000796	431720	ensembl_gene_id	D. rerio	3164	H. sapiens	NR4A1	nuclear receptor subfamily 4 group A member 1	GO:0043435 response to corticotropin-releasing hormone;GO:0071376 cellular response to corticotropin-releasing hormone stimulus;GO:0061469 regulation of type B pancreatic cell proliferation		Transcription factors:Zinc-coordinating DNA-binding domains; Nuclear receptors; Predicted intracellular proteins	Nucleoplasm (Supported); Additional: Cytosol;Nuclear membrane		(M162)PID RXR VDR PATHWAY; (M113)PID NFAT 3PATHWAY; (M115)PID REG GR PATHWAY	(M5941)HALLMARK UV RESPONSE UP; (M5890)HALLMARK TNFA SIGNALING VIA NFKB	0.0	0.0	0.0	1.0	0.0	0.0	0.0	0.0	0.0	0.0	0.0	0.0	0.0	0.0	0.0	0.0	0.0	0.0	1.0	0.0
ENSDARG00000003251	64809	ensembl_gene_id	D. rerio	9278	H. sapiens	ZBTB22	zinc finger and BTB domain containing 22	GO:0006357 regulation of transcription by RNA polymerase II;GO:0006366 transcription by RNA polymerase II;GO:0006355 regulation of transcription, DNA-templated		Transcription factors:Zinc-coordinating DNA-binding domains; Predicted intracellular proteins	Nucleoplasm (Approved)				0.0	0.0	0.0	0.0	0.0	0.0	0.0	0.0	0.0	0.0	0.0	0.0	0.0	0.0	0.0	0.0	0.0	0.0	0.0	0.0
ENSDARG00000060435	100149386	ensembl_gene_id	D. rerio	149428	H. sapiens	BNIPL	BCL2 interacting protein like	GO:0006798 polyphosphate catabolic process;GO:0006797 polyphosphate metabolic process;GO:0040009 regulation of growth rate		Predicted intracellular proteins	Cytosol (Uncertain)				0.0	0.0	0.0	0.0	0.0	0.0	0.0	0.0	0.0	0.0	0.0	0.0	0.0	0.0	0.0	0.0	0.0	0.0	0.0	0.0
ENSDARG00000056678	393254	ensembl_gene_id	D. rerio	4210	H. sapiens	MEFV	MEFV innate immuity regulator, pyrin	GO:0071641 negative regulation of macrophage inflammatory protein 1 alpha production;GO:0071608 macrophage inflammatory protein-1 alpha production;GO:0071640 regulation of macrophage inflammatory protein 1 alpha production		Disease related genes; Predicted intracellular proteins	Nucleoplasm (Supported); Additional: Cytosol			(M5932)HALLMARK INFLAMMATORY RESPONSE; (M5956)HALLMARK KRAS SIGNALING DN	0.0	0.0	0.0	0.0	0.0	1.0	0.0	0.0	1.0	0.0	0.0	0.0	1.0	0.0	0.0	0.0	0.0	0.0	0.0	0.0
ENSDARG00000032072	559750	ensembl_gene_id	D. rerio	5127	H. sapiens	CDK16	cyclin dependent kinase 16	GO:0030252 growth hormone secretion;GO:0000083 regulation of transcription involved in G1/S transition of mitotic cell cycle;GO:0061178 regulation of insulin secretion involved in cellular response to glucose stimulus	CMGC Ser/Thr protein kinase family	Predicted intracellular proteins; ENZYME proteins:Transferases; Enzymes; Kinases:CMGC Ser/Thr protein kinases	Cytosol;Microtubules (Approved); Additional: Plasma membrane	(2Z,3E)-2,3'-biindole-2',3(1H,1'H)-dione 3-{O-[(3R)-3,4-dihydroxybutyl]oxime}; Fostamatinib			0.0	0.0	0.0	0.0	0.0	0.0	0.0	0.0	0.0	0.0	0.0	0.0	0.0	0.0	0.0	0.0	0.0	0.0	0.0	0.0
ENSDARG00000061021	100000787	ensembl_gene_id	D. rerio	729830	H. sapiens	FHIP1A	FHF complex subunit HOOK interacting protein 1A			Predicted intracellular proteins	Cytosol (Approved)				0.0	0.0	0.0	0.0	0.0	0.0	0.0	0.0	0.0	0.0	0.0	0.0	0.0	0.0	0.0	0.0	0.0	0.0	0.0	0.0
ENSDARG00000097800						None	None	None	None	None	None	None	None	None	nan	nan	nan	nan	nan	nan	nan	nan	nan	nan	nan	nan	nan	nan	nan	nan	nan	nan	nan	nan
ENSDARG00000098273	406857	ensembl_gene_id	D. rerio	7541	H. sapiens	ZBTB14	zinc finger and BTB domain containing 14	GO:0060976 coronary vasculature development;GO:0003170 heart valve development;GO:0003279 cardiac septum development		Transcription factors:Zinc-coordinating DNA-binding domains; Predicted intracellular proteins	Nucleoplasm (Supported); Additional: Cytosol;Nucleoli				0.0	0.0	0.0	0.0	0.0	0.0	0.0	0.0	0.0	0.0	0.0	0.0	0.0	0.0	0.0	0.0	0.0	0.0	0.0	0.0
ENSDARG00000038954	58117	ensembl_gene_id	D. rerio	56998	H. sapiens	CTNNBIP1	catenin beta interacting protein 1	GO:0002528 regulation of vascular permeability involved in acute inflammatory response;GO:0060633 negative regulation of transcription initiation from RNA polymerase II promoter;GO:0072201 negative regulation of mesenchymal cell proliferation		Predicted intracellular proteins	Cell Junctions;Mitochondria;Plasma membrane (Approved)		(M223)PID BETA CATENIN NUC PATHWAY; (M5493)WNT SIGNALING		0.0	0.0	0.0	0.0	0.0	0.0	0.0	0.0	0.0	0.0	0.0	0.0	1.0	0.0	0.0	0.0	0.0	0.0	0.0	0.0
ENSDARG00000002601	140746	ensembl_gene_id	D. rerio	4211	H. sapiens	MEIS1	Meis homeobox 1	GO:0035855 megakaryocyte development;GO:0060216 definitive hemopoiesis;GO:0002089 lens morphogenesis in camera-type eye		Predicted intracellular proteins; Disease related genes; Transcription factors:Helix-turn-helix domains	Nucleoplasm (Approved)			(M5901)HALLMARK G2M CHECKPOINT	0.0	0.0	0.0	0.0	0.0	0.0	0.0	0.0	0.0	0.0	0.0	0.0	0.0	0.0	0.0	1.0	0.0	0.0	0.0	0.0
ENSDARG00000076752	572194	ensembl_gene_id	D. rerio	91147	H. sapiens	TMEM67	transmembrane protein 67	GO:0010826 negative regulation of centrosome duplication;GO:0046606 negative regulation of centrosome cycle;GO:0010824 regulation of centrosome duplication		Predicted intracellular proteins; Disease related genes; Potential drug targets; Transporters					0.0	0.0	1.0	0.0	0.0	0.0	0.0	0.0	1.0	0.0	0.0	0.0	1.0	0.0	0.0	0.0	0.0	0.0	0.0	0.0
ENSDARG00000100664						None	None	None	None	None	None	None	None	None	nan	nan	nan	nan	nan	nan	nan	nan	nan	nan	nan	nan	nan	nan	nan	nan	nan	nan	nan	nan
ENSDARG00000104264	777704	ensembl_gene_id	D. rerio	114786	H. sapiens	XKR4	XK related 4	GO:0070782 phosphatidylserine exposure on apoptotic cell surface;GO:0043652 engulfment of apoptotic cell;GO:0017121 phospholipid scrambling		Transporters:Electrochemical Potential-driven transporters	Vesicles (Approved)				0.0	0.0	0.0	0.0	0.0	0.0	0.0	0.0	0.0	0.0	0.0	0.0	0.0	0.0	0.0	0.0	0.0	0.0	0.0	0.0
ENSDARG00000100151	100329494	ensembl_gene_id	D. rerio			None	None	None	None	None	None	None	None	None	nan	nan	nan	nan	nan	nan	nan	nan	nan	nan	nan	nan	nan	nan	nan	nan	nan	nan	nan	nan
ENSDARG00000069031	797097	ensembl_gene_id	D. rerio	153770	H. sapiens	PLAC8L1	PLAC8 like 1			Predicted intracellular proteins	Nucleoplasm (Approved)				0.0	0.0	0.0	0.0	0.0	0.0	0.0	0.0	0.0	0.0	0.0	0.0	0.0	0.0	0.0	0.0	0.0	0.0	0.0	0.0
ENSDARG00000075936						None	None	None	None	None	None	None	None	None	nan	nan	nan	nan	nan	nan	nan	nan	nan	nan	nan	nan	nan	nan	nan	nan	nan	nan	nan	nan
ENSDARG00000104934						None	None	None	None	None	None	None	None	None	nan	nan	nan	nan	nan	nan	nan	nan	nan	nan	nan	nan	nan	nan	nan	nan	nan	nan	nan	nan
ENSDARG00000036473	566292	ensembl_gene_id	D. rerio	6618	H. sapiens	SNAPC2	small nuclear RNA activating complex polypeptide 2	GO:0006383 transcription by RNA polymerase III;GO:0042795 snRNA transcription by RNA polymerase II;GO:0009301 snRNA transcription		Predicted intracellular proteins	Nuclear bodies;Nucleoplasm (Supported); Additional: Cytosol				0.0	0.0	0.0	0.0	0.0	0.0	1.0	0.0	0.0	0.0	0.0	0.0	0.0	0.0	0.0	0.0	0.0	0.0	0.0	0.0
ENSDARG00000060929	561654	ensembl_gene_id	D. rerio	55182	H. sapiens	RNF220	ring finger protein 220	GO:0051865 protein autoubiquitination;GO:0090263 positive regulation of canonical Wnt signaling pathway;GO:0030177 positive regulation of Wnt signaling pathway		ENZYME proteins:Transferases; Enzymes; Predicted intracellular proteins	Nucleoplasm (Approved)				0.0	0.0	0.0	0.0	0.0	0.0	0.0	0.0	0.0	0.0	0.0	0.0	0.0	0.0	0.0	0.0	0.0	0.0	0.0	0.0
ENSDARG00000001888	30672	ensembl_gene_id	D. rerio	5495	H. sapiens	PPM1B	protein phosphatase, Mg2+/Mn2+ dependent 1B	GO:0006499 N-terminal protein myristoylation;GO:0018377 protein myristoylation;GO:0006498 N-terminal protein lipidation		Enzymes; Predicted intracellular proteins; ENZYME proteins:Hydrolases	Cytosol;Nucleoli (Approved)			(M5905)HALLMARK ADIPOGENESIS	0.0	0.0	0.0	0.0	0.0	0.0	0.0	0.0	0.0	1.0	0.0	0.0	0.0	0.0	0.0	0.0	0.0	0.0	0.0	0.0
ENSDARG00000062983	567995	ensembl_gene_id	D. rerio	84893	H. sapiens	FBH1	F-box DNA helicase 1	GO:0072429 response to intra-S DNA damage checkpoint signaling;GO:1902231 positive regulation of intrinsic apoptotic signaling pathway in response to DNA damage;GO:0072396 response to cell cycle checkpoint signaling		Disease related genes; Enzymes; Potential drug targets; ENZYME proteins:Hydrolases					1.0	0.0	0.0	0.0	0.0	0.0	0.0	0.0	0.0	0.0	0.0	0.0	0.0	0.0	0.0	0.0	1.0	0.0	0.0	0.0
ENSDARG00000063718	100001285	ensembl_gene_id	D. rerio	6944	H. sapiens	VPS72	vacuolar protein sorting 72 homolog	GO:0043486 histone exchange;GO:0035019 somatic stem cell population maintenance;GO:0043044 ATP-dependent chromatin remodeling		Predicted intracellular proteins	Nuclear speckles (Approved)				0.0	0.0	0.0	0.0	0.0	0.0	0.0	0.0	0.0	0.0	0.0	0.0	0.0	0.0	0.0	0.0	0.0	0.0	1.0	0.0
ENSDARG00000074034	555224	ensembl_gene_id	D. rerio	10276	H. sapiens	NET1	neuroepithelial cell transforming 1	GO:0051451 myoblast migration;GO:0035025 positive regulation of Rho protein signal transduction;GO:0071479 cellular response to ionizing radiation		Predicted intracellular proteins	Nucleoplasm (Approved); Additional: Vesicles		(M68)PID RHOA REG PATHWAY	(M5893)HALLMARK MITOTIC SPINDLE	0.0	0.0	0.0	0.0	1.0	0.0	0.0	0.0	0.0	0.0	0.0	0.0	0.0	0.0	0.0	0.0	0.0	0.0	0.0	0.0
ENSDARG00000062025	321294	ensembl_gene_id	D. rerio	1371	H. sapiens	CPOX	coproporphyrinogen oxidase	GO:0006782 protoporphyrinogen IX biosynthetic process;GO:0046501 protoporphyrinogen IX metabolic process;GO:0006783 heme biosynthetic process		Potential drug targets; Disease related genes; ENZYME proteins:Oxidoreductases; Enzymes	Mitochondria (Enhanced)			(M5935)HALLMARK FATTY ACID METABOLISM; (M5945)HALLMARK HEME METABOLISM	0.0	0.0	0.0	0.0	0.0	0.0	0.0	0.0	0.0	0.0	0.0	0.0	0.0	0.0	0.0	0.0	0.0	0.0	0.0	0.0
ENSDARG00000036456	353362	ensembl_gene_id	D. rerio	307	H. sapiens	ANXA4	annexin A4	GO:0032717 negative regulation of interleukin-8 production;GO:0032088 negative regulation of NF-kappaB transcription factor activity;GO:0032677 regulation of interleukin-8 production		Predicted intracellular proteins; Cancer-related genes:Candidate cancer biomarkers	Cytosol (Approved)	Fluocinolone acetonide; Copper	(M5880)NABA ECM AFFILIATED; (M5885)NABA MATRISOME ASSOCIATED; (M5889)NABA MATRISOME	(M5942)HALLMARK UV RESPONSE DN; (M5947)HALLMARK IL2 STAT5 SIGNALING	0.0	0.0	0.0	0.0	0.0	0.0	0.0	0.0	0.0	0.0	0.0	0.0	0.0	0.0	0.0	0.0	0.0	0.0	0.0	0.0
ENSDARG00000088817	103909113	ensembl_gene_id	D. rerio	79726	H. sapiens	WDR59	WD repeat domain 59	GO:0032008 positive regulation of TOR signaling;GO:0034198 cellular response to amino acid starvation;GO:1990928 response to amino acid starvation		Predicted intracellular proteins	Cytosol (Approved)				1.0	0.0	0.0	0.0	0.0	1.0	0.0	0.0	0.0	0.0	0.0	0.0	0.0	0.0	0.0	0.0	0.0	0.0	0.0	0.0
ENSDARG00000105435	101883062	ensembl_gene_id	D. rerio			None	None	None	None	None	None	None	None	None	nan	nan	nan	nan	nan	nan	nan	nan	nan	nan	nan	nan	nan	nan	nan	nan	nan	nan	nan	nan
ENSDARG00000004875						None	None	None	None	None	None	None	None	None	nan	nan	nan	nan	nan	nan	nan	nan	nan	nan	nan	nan	nan	nan	nan	nan	nan	nan	nan	nan
ENSDARG00000092006						None	None	None	None	None	None	None	None	None	nan	nan	nan	nan	nan	nan	nan	nan	nan	nan	nan	nan	nan	nan	nan	nan	nan	nan	nan	nan
ENSDARG00000098816	564371	ensembl_gene_id	D. rerio	3748	H. sapiens	KCNC3	potassium voltage-gated channel subfamily C member 3	GO:0051262 protein tetramerization;GO:0051260 protein homooligomerization;GO:0071804 cellular potassium ion transport		Disease related genes; Transporters:Transporter channels and pores; FDA approved drug targets:Small molecule drugs; Predicted intracellular proteins; Voltage-gated ion channels:Voltage-Gated Potassium Channels		Dalfampridine			0.0	0.0	1.0	1.0	0.0	0.0	0.0	0.0	0.0	0.0	0.0	0.0	0.0	0.0	0.0	0.0	0.0	1.0	0.0	0.0
ENSDARG00000003421	100136839	ensembl_gene_id	D. rerio	10644	H. sapiens	IGF2BP2	insulin like growth factor 2 mRNA binding protein 2	GO:0051028 mRNA transport;GO:0043488 regulation of mRNA stability;GO:0043487 regulation of RNA stability		Predicted intracellular proteins	Cytosol (Enhanced)				1.0	0.0	0.0	0.0	0.0	0.0	0.0	0.0	0.0	0.0	0.0	0.0	0.0	0.0	0.0	0.0	0.0	0.0	0.0	0.0
ENSDARG00000105059	100003690	ensembl_gene_id	D. rerio	79414	H. sapiens	LRFN3	leucine rich repeat and fibronectin type III domain containing 3	GO:0099179 regulation of synaptic membrane adhesion;GO:0099560 synaptic membrane adhesion;GO:0099174 regulation of presynapse organization							0.0	0.0	0.0	0.0	0.0	0.0	0.0	0.0	0.0	0.0	0.0	0.0	0.0	0.0	0.0	0.0	0.0	1.0	0.0	0.0
ENSDARG00000002167	436925	ensembl_gene_id	D. rerio			None	None	None	None	None	None	None	None	None	nan	nan	nan	nan	nan	nan	nan	nan	nan	nan	nan	nan	nan	nan	nan	nan	nan	nan	nan	nan
ENSDARG00000101635	405799	ensembl_gene_id	D. rerio	51339	H. sapiens	DACT1	dishevelled binding antagonist of beta catenin 1	GO:0048619 embryonic hindgut morphogenesis;GO:1904863 regulation of beta-catenin-TCF complex assembly;GO:1904864 negative regulation of beta-catenin-TCF complex assembly		Disease related genes; Predicted intracellular proteins	Nucleoplasm (Supported)		(M17761)ST WNT BETA CATENIN PATHWAY		0.0	0.0	0.0	0.0	0.0	0.0	0.0	0.0	1.0	0.0	0.0	0.0	1.0	0.0	1.0	0.0	1.0	0.0	0.0	0.0
ENSDARG00000100310						None	None	None	None	None	None	None	None	None	nan	nan	nan	nan	nan	nan	nan	nan	nan	nan	nan	nan	nan	nan	nan	nan	nan	nan	nan	nan
ENSDARG00000044422	30457	ensembl_gene_id	D. rerio	93	H. sapiens	ACVR2B	activin A receptor type 2B	GO:0032927 positive regulation of activin receptor signaling pathway;GO:0060836 lymphatic endothelial cell differentiation;GO:0060841 venous blood vessel development	TKL Ser/Thr protein kinase family	Kinases:TKL Ser/Thr protein kinases; Disease related genes; ENZYME proteins:Transferases; Enzymes; Cancer-related genes:Mutated cancer genes; Cancer-related genes:Candidate cancer biomarkers; Potential drug targets	Cytosol (Uncertain); Additional: Nuclear bodies;Nucleoplasm		(M185)PID ALK1 PATHWAY		0.0	0.0	0.0	0.0	0.0	0.0	0.0	0.0	0.0	0.0	0.0	0.0	0.0	0.0	0.0	0.0	0.0	0.0	0.0	0.0
ENSDARG00000032197	100126139	ensembl_gene_id	D. rerio	11278	H. sapiens	KLF12	Kruppel like factor 12	GO:0000122 negative regulation of transcription by RNA polymerase II;GO:0045944 positive regulation of transcription by RNA polymerase II;GO:0045892 negative regulation of transcription, DNA-templated		Transcription factors:Zinc-coordinating DNA-binding domains; Predicted intracellular proteins	Nucleoplasm (Approved); Additional: Cytosol				0.0	0.0	0.0	0.0	0.0	0.0	0.0	0.0	0.0	0.0	0.0	0.0	0.0	0.0	0.0	0.0	0.0	0.0	0.0	0.0
ENSDARG00000045145	541382	ensembl_gene_id	D. rerio	729993	H. sapiens	SHISA9	shisa family member 9	GO:0048172 regulation of short-term neuronal synaptic plasticity;GO:0098962 regulation of postsynaptic neurotransmitter receptor activity;GO:2000311 regulation of AMPA receptor activity		Transporters:Accessory Factors Involved in Transport	Cytosol;Vesicles (Approved)				0.0	0.0	0.0	0.0	0.0	0.0	0.0	0.0	0.0	0.0	0.0	0.0	0.0	0.0	0.0	1.0	0.0	0.0	0.0	0.0
ENSDARG00000042221	100034522	ensembl_gene_id	D. rerio	25902	H. sapiens	MTHFD1L	methylenetetrahydrofolate dehydrogenase (NADP+ dependent) 1 like	GO:0009257 10-formyltetrahydrofolate biosynthetic process;GO:0009256 10-formyltetrahydrofolate metabolic process;GO:0015942 formate metabolic process		ENZYME proteins:Ligase; Enzymes; Predicted intracellular proteins	Mitochondria (Enhanced)				0.0	0.0	0.0	0.0	0.0	0.0	0.0	0.0	0.0	0.0	0.0	0.0	0.0	0.0	0.0	0.0	0.0	0.0	0.0	1.0
ENSDARG00000077002	557878	ensembl_gene_id	D. rerio	3321	H. sapiens	IGSF3	immunoglobulin superfamily member 3	GO:0032808 lacrimal gland development;GO:0035272 exocrine system development;GO:0048732 gland development		Disease related genes; Predicted intracellular proteins	Nucleoplasm (Approved); Additional: Cytosol			(M5945)HALLMARK HEME METABOLISM	0.0	0.0	0.0	0.0	0.0	0.0	0.0	0.0	0.0	0.0	0.0	0.0	0.0	0.0	0.0	0.0	0.0	0.0	0.0	0.0
ENSDARG00000067832	692261	ensembl_gene_id	D. rerio			None	None	None	None	None	None	None	None	None	nan	nan	nan	nan	nan	nan	nan	nan	nan	nan	nan	nan	nan	nan	nan	nan	nan	nan	nan	nan
ENSDARG00000033993	497434	ensembl_gene_id	D. rerio	6573	H. sapiens	SLC19A1	solute carrier family 19 member 1	GO:0051958 methotrexate transport;GO:1904447 folate import across plasma membrane;GO:0098838 folate transmembrane transport		Transporters:Electrochemical Potential-driven transporters; Cancer-related genes:Candidate cancer biomarkers	Plasma membrane (Approved)			(M5928)HALLMARK MYC TARGETS V2; (M5905)HALLMARK ADIPOGENESIS	0.0	0.0	0.0	0.0	0.0	0.0	0.0	0.0	0.0	0.0	0.0	0.0	0.0	0.0	0.0	0.0	0.0	0.0	0.0	0.0
ENSDARG00000095397						None	None	None	None	None	None	None	None	None	nan	nan	nan	nan	nan	nan	nan	nan	nan	nan	nan	nan	nan	nan	nan	nan	nan	nan	nan	nan
ENSDARG00000097328						None	None	None	None	None	None	None	None	None	nan	nan	nan	nan	nan	nan	nan	nan	nan	nan	nan	nan	nan	nan	nan	nan	nan	nan	nan	nan
ENSDARG00000101350						None	None	None	None	None	None	None	None	None	nan	nan	nan	nan	nan	nan	nan	nan	nan	nan	nan	nan	nan	nan	nan	nan	nan	nan	nan	nan
ENSDARG00000029370	378477	ensembl_gene_id	D. rerio	22881	H. sapiens	ANKRD6	ankyrin repeat domain 6	GO:2000096 positive regulation of Wnt signaling pathway, planar cell polarity pathway;GO:2000052 positive regulation of non-canonical Wnt signaling pathway;GO:2000095 regulation of Wnt signaling pathway, planar cell polarity pathway		Predicted intracellular proteins	Vesicles (Enhanced)		(M17761)ST WNT BETA CATENIN PATHWAY		0.0	0.0	0.0	0.0	0.0	0.0	0.0	0.0	0.0	0.0	0.0	0.0	0.0	0.0	0.0	0.0	1.0	0.0	0.0	0.0
ENSDARG00000029907	563772	ensembl_gene_id	D. rerio	57159	H. sapiens	TRIM54	tripartite motif containing 54	GO:0007026 negative regulation of microtubule depolymerization;GO:0031114 regulation of microtubule depolymerization;GO:0031111 negative regulation of microtubule polymerization or depolymerization		Predicted intracellular proteins	Cytosol;Plasma membrane (Approved)				0.0	0.0	0.0	0.0	0.0	0.0	0.0	0.0	0.0	0.0	0.0	0.0	1.0	1.0	0.0	0.0	0.0	0.0	0.0	0.0
ENSDARG00000098666	449943	ensembl_gene_id	D. rerio			None	None	None	None	None	None	None	None	None	nan	nan	nan	nan	nan	nan	nan	nan	nan	nan	nan	nan	nan	nan	nan	nan	nan	nan	nan	nan
ENSDARG00000039500	100333421	ensembl_gene_id	D. rerio	79414	H. sapiens	LRFN3	leucine rich repeat and fibronectin type III domain containing 3	GO:0099179 regulation of synaptic membrane adhesion;GO:0099560 synaptic membrane adhesion;GO:0099174 regulation of presynapse organization							0.0	0.0	0.0	0.0	0.0	0.0	0.0	0.0	0.0	0.0	0.0	0.0	0.0	0.0	0.0	0.0	0.0	1.0	0.0	0.0
ENSDARG00000055054	449532	ensembl_gene_id	D. rerio	283149	H. sapiens	BCL9L	BCL9 like	GO:1904837 beta-catenin-TCF complex assembly;GO:0010718 positive regulation of epithelial to mesenchymal transition;GO:0035914 skeletal muscle cell differentiation		Cancer-related genes; Predicted intracellular proteins	Nucleoplasm (Enhanced)				0.0	0.0	0.0	0.0	0.0	0.0	0.0	0.0	0.0	0.0	0.0	0.0	0.0	0.0	0.0	0.0	0.0	0.0	0.0	0.0
ENSDARG00000087529	406563	ensembl_gene_id	D. rerio	120892	H. sapiens	LRRK2	leucine rich repeat kinase 2	GO:1903123 regulation of thioredoxin peroxidase activity;GO:1903124 negative regulation of thioredoxin peroxidase activity;GO:1903125 negative regulation of thioredoxin peroxidase activity by peptidyl-threonine phosphorylation	TKL Ser/Thr protein kinase family	Kinases:TKL Ser/Thr protein kinases; Cancer-related genes:Mutational cancer driver genes; Disease related genes; ENZYME proteins:Transferases; Enzymes; Potential drug targets; Predicted intracellular proteins	Vesicles (Supported)	Fostamatinib			1.0	1.0	1.0	0.0	1.0	1.0	0.0	0.0	1.0	1.0	0.0	1.0	1.0	0.0	1.0	1.0	1.0	0.0	0.0	0.0
ENSDARG00000075805	564106	ensembl_gene_id	D. rerio	6874	H. sapiens	TAF4	TATA-box binding protein associated factor 4	GO:0001541 ovarian follicle development;GO:0008585 female gonad development;GO:0046545 development of primary female sexual characteristics		Predicted intracellular proteins	Nucleoplasm (Enhanced)				0.0	1.0	0.0	0.0	0.0	0.0	0.0	0.0	0.0	0.0	1.0	0.0	0.0	0.0	0.0	0.0	0.0	0.0	0.0	0.0
ENSDARG00000020982	777736	ensembl_gene_id	D. rerio	144165	H. sapiens	PRICKLE1	prickle planar cell polarity protein 1	GO:2000690 regulation of cardiac muscle cell myoblast differentiation;GO:2000691 negative regulation of cardiac muscle cell myoblast differentiation;GO:0051892 negative regulation of cardioblast differentiation		Disease related genes; Predicted intracellular proteins	Nucleoplasm (Approved)				1.0	0.0	0.0	0.0	0.0	0.0	0.0	0.0	1.0	1.0	0.0	0.0	0.0	0.0	0.0	0.0	0.0	0.0	0.0	0.0
ENSDARG00000060124	562144	ensembl_gene_id	D. rerio	10245	H. sapiens	TIMM17B	translocase of inner mitochondrial membrane 17B	GO:0030150 protein import into mitochondrial matrix;GO:0044743 protein transmembrane import into intracellular organelle;GO:0065002 intracellular protein transmembrane transport		Predicted intracellular proteins	Microtubules (Approved); Additional: Mitochondria				1.0	1.0	1.0	0.0	0.0	0.0	0.0	0.0	0.0	0.0	0.0	0.0	0.0	0.0	0.0	0.0	0.0	0.0	0.0	0.0
ENSDARG00000003797	567986	ensembl_gene_id	D. rerio	51676	H. sapiens	ASB2	ankyrin repeat and SOCS box containing 2	GO:0035914 skeletal muscle cell differentiation;GO:0007519 skeletal muscle tissue development;GO:0060538 skeletal muscle organ development		Predicted intracellular proteins	Nucleoli fibrillar center (Approved); Additional: Cytosol;Nucleoplasm				0.0	0.0	0.0	0.0	0.0	0.0	0.0	0.0	1.0	0.0	0.0	0.0	0.0	0.0	0.0	0.0	0.0	0.0	0.0	0.0
ENSDARG00000098320	100150246	ensembl_gene_id	D. rerio	2911	H. sapiens	GRM1	glutamate metabotropic receptor 1	GO:0099566 regulation of postsynaptic cytosolic calcium ion concentration;GO:0071257 cellular response to electrical stimulus;GO:0051938 L-glutamate import		Transporters; Disease related genes; G-protein coupled receptors:GPCRs excl olfactory receptors; G-protein coupled receptors:Family 3 (C) receptors; Potential drug targets	Vesicles (Approved)	Glutamic acid; (S)-alpha-methyl-4-carboxyphenylglycine			0.0	1.0	0.0	0.0	0.0	0.0	0.0	0.0	0.0	0.0	0.0	1.0	0.0	0.0	0.0	1.0	1.0	1.0	1.0	0.0
ENSDARG00000076542	561483	ensembl_gene_id	D. rerio	23126	H. sapiens	POGZ	pogo transposable element derived with ZNF domain	GO:0051382 kinetochore assembly;GO:0051383 kinetochore organization;GO:0007064 mitotic sister chromatid cohesion		Transcription factors:Zinc-coordinating DNA-binding domains; Disease related genes; Predicted intracellular proteins	Nucleoplasm (Enhanced)				0.0	0.0	0.0	0.0	0.0	0.0	0.0	0.0	0.0	0.0	0.0	0.0	0.0	0.0	0.0	0.0	0.0	0.0	0.0	0.0
ENSDARG00000011171	568845	ensembl_gene_id	D. rerio	55714	H. sapiens	TENM3	teneurin transmembrane protein 3	GO:1903385 regulation of homophilic cell adhesion;GO:0007157 heterophilic cell-cell adhesion via plasma membrane cell adhesion molecules;GO:0048593 camera-type eye morphogenesis		Disease related genes; Predicted intracellular proteins	Nucleoplasm (Approved)				0.0	0.0	0.0	0.0	0.0	0.0	0.0	0.0	0.0	0.0	0.0	0.0	0.0	0.0	0.0	0.0	0.0	0.0	0.0	0.0
ENSDARG00000102106	566581	ensembl_gene_id	D. rerio	7051	H. sapiens	TGM1	transglutaminase 1	GO:0043163 cell envelope organization;GO:0045229 external encapsulating structure organization;GO:0010838 positive regulation of keratinocyte proliferation		Disease related genes; ENZYME proteins:Transferases; Enzymes; Potential drug targets; Predicted intracellular proteins	Plasma membrane;Vesicles (Approved)		(M3468)NABA ECM REGULATORS; (M5885)NABA MATRISOME ASSOCIATED; (M5889)NABA MATRISOME	(M5956)HALLMARK KRAS SIGNALING DN	0.0	0.0	0.0	0.0	0.0	0.0	0.0	0.0	0.0	0.0	0.0	0.0	0.0	0.0	0.0	0.0	0.0	0.0	0.0	0.0
ENSDARG00000026024	492327	ensembl_gene_id	D. rerio	158747	H. sapiens	MOSPD2	motile sperm domain containing 2	GO:0090026 positive regulation of monocyte chemotaxis;GO:0090023 positive regulation of neutrophil chemotaxis;GO:0071677 positive regulation of mononuclear cell migration		Predicted intracellular proteins	Endoplasmic reticulum (Approved)				0.0	0.0	0.0	1.0	0.0	0.0	0.0	0.0	0.0	0.0	0.0	0.0	0.0	0.0	0.0	0.0	0.0	0.0	0.0	0.0
ENSDARG00000098064						None	None	None	None	None	None	None	None	None	nan	nan	nan	nan	nan	nan	nan	nan	nan	nan	nan	nan	nan	nan	nan	nan	nan	nan	nan	nan
ENSDARG00000083699						None	None	None	None	None	None	None	None	None	nan	nan	nan	nan	nan	nan	nan	nan	nan	nan	nan	nan	nan	nan	nan	nan	nan	nan	nan	nan
ENSDARG00000079470	798487	ensembl_gene_id	D. rerio	5128	H. sapiens	CDK17	cyclin dependent kinase 17	GO:0000083 regulation of transcription involved in G1/S transition of mitotic cell cycle;GO:0000082 G1/S transition of mitotic cell cycle;GO:0044843 cell cycle G1/S phase transition	CMGC Ser/Thr protein kinase family	Predicted intracellular proteins; ENZYME proteins:Transferases; Enzymes; Kinases:CMGC Ser/Thr protein kinases	Cytosol;Nucleoplasm (Approved)	Fostamatinib			0.0	0.0	0.0	0.0	0.0	0.0	0.0	0.0	0.0	0.0	0.0	0.0	0.0	0.0	0.0	0.0	0.0	0.0	0.0	0.0
ENSDARG00000059600	568064	ensembl_gene_id	D. rerio	9135	H. sapiens	RABEP1	rabaptin, RAB GTPase binding effector protein 1	GO:1903441 protein localization to ciliary membrane;GO:0061512 protein localization to cilium;GO:0006893 Golgi to plasma membrane transport		Cancer-related genes; Predicted intracellular proteins	Vesicles (Supported)			(M5907)HALLMARK ESTROGEN RESPONSE LATE	1.0	0.0	0.0	0.0	0.0	0.0	0.0	0.0	0.0	0.0	0.0	0.0	0.0	0.0	0.0	0.0	0.0	0.0	0.0	0.0
ENSDARG00000071469	100330008	ensembl_gene_id	D. rerio	114991	H. sapiens	ZNF618	zinc finger protein 618	GO:0035563 positive regulation of chromatin binding;GO:0035561 regulation of chromatin binding;GO:0051099 positive regulation of binding		Transcription factors:Zinc-coordinating DNA-binding domains; Predicted intracellular proteins	Nucleoplasm (Approved)				0.0	0.0	0.0	0.0	0.0	0.0	0.0	0.0	0.0	0.0	0.0	0.0	0.0	0.0	0.0	0.0	0.0	0.0	0.0	0.0
ENSDARG00000063711	562489	ensembl_gene_id	D. rerio	10612	H. sapiens	TRIM3	tripartite motif containing 3	GO:0000209 protein polyubiquitination;GO:0043161 proteasome-mediated ubiquitin-dependent protein catabolic process;GO:0010498 proteasomal protein catabolic process		Predicted intracellular proteins	Mitochondria (Approved)				0.0	0.0	0.0	0.0	0.0	0.0	0.0	0.0	1.0	0.0	0.0	0.0	0.0	0.0	0.0	0.0	0.0	0.0	0.0	0.0
ENSDARG00000018228	100000981	ensembl_gene_id	D. rerio	3358	H. sapiens	HTR2C	5-hydroxytryptamine receptor 2C	GO:0007208 phospholipase C-activating serotonin receptor signaling pathway;GO:0043396 corticotropin-releasing hormone secretion;GO:0043397 regulation of corticotropin-releasing hormone secretion		G-protein coupled receptors:GPCRs excl olfactory receptors; G-protein coupled receptors:Serotonin receptors; FDA approved drug targets:Small molecule drugs		Tramadol; Ziprasidone; Methysergide; Cabergoline; Amitriptyline; Olanzapine; Clozapine; Mirtazapine; Loxapine; Promazine; Cyproheptadine; Imipramine; Fluoxetine; Chlorpromazine; Haloperidol; Nortriptyline; Amoxapine; Fenfluramine; Lisuride; Fluphenazine; Trazodone; Ergotamine; Apomorphine; Trimipramine; Risperidone; Propiomazine; Minaprine; Cyclobenzaprine; Maprotiline; Tegaserod; Doxepin; Nefazo…			0.0	0.0	1.0	0.0	0.0	1.0	0.0	0.0	0.0	0.0	0.0	1.0	0.0	0.0	0.0	1.0	1.0	0.0	0.0	1.0
ENSDARG00000101507	101883461	ensembl_gene_id	D. rerio	23130	H. sapiens	ATG2A	autophagy related 2A	GO:0016237 lysosomal microautophagy;GO:0034727 piecemeal microautophagy of the nucleus;GO:0044805 late nucleophagy		Predicted intracellular proteins; Transporters	Vesicles (Supported); Additional: Nucleoplasm				0.0	1.0	0.0	0.0	0.0	1.0	0.0	0.0	0.0	0.0	0.0	0.0	0.0	1.0	0.0	0.0	0.0	0.0	0.0	0.0
ENSDARG00000068199	571938	ensembl_gene_id	D. rerio	23646	H. sapiens	PLD3	phospholipase D family member 3	GO:1900015 regulation of cytokine production involved in inflammatory response;GO:0002534 cytokine production involved in inflammatory response;GO:0002532 production of molecular mediator involved in inflammatory response		ENZYME proteins:Hydrolases; Disease related genes; Enzymes; Potential drug targets; Predicted intracellular proteins	Cytosol;Endoplasmic reticulum (Approved); Additional: Nucleoplasm		(M15743)ST GA12 PATHWAY; (M7416)ST GAQ PATHWAY; (M12645)ST GA13 PATHWAY		0.0	0.0	0.0	0.0	0.0	0.0	0.0	0.0	0.0	0.0	0.0	0.0	0.0	0.0	0.0	0.0	0.0	0.0	0.0	0.0
ENSDARG00000074949	564609	ensembl_gene_id	D. rerio	114905	H. sapiens	C1QTNF7	C1q and TNF related 7			Predicted secreted proteins	Vesicles (Approved)		(M5880)NABA ECM AFFILIATED; (M5885)NABA MATRISOME ASSOCIATED; (M5889)NABA MATRISOME		0.0	0.0	0.0	0.0	0.0	0.0	0.0	0.0	0.0	0.0	0.0	0.0	0.0	0.0	0.0	0.0	0.0	0.0	0.0	0.0
ENSDARG00000063451	555345	ensembl_gene_id	D. rerio	152206	H. sapiens	CCDC13	coiled-coil domain containing 13	GO:1905515 non-motile cilium assembly;GO:0031122 cytoplasmic microtubule organization;GO:0060271 cilium assembly		Predicted intracellular proteins	Centrosome (Supported)				0.0	0.0	0.0	0.0	0.0	0.0	0.0	0.0	0.0	0.0	0.0	0.0	0.0	0.0	0.0	0.0	0.0	0.0	0.0	0.0
ENSDARG00000093851						None	None	None	None	None	None	None	None	None	nan	nan	nan	nan	nan	nan	nan	nan	nan	nan	nan	nan	nan	nan	nan	nan	nan	nan	nan	nan
ENSDARG00000067676	563105	ensembl_gene_id	D. rerio	51196	H. sapiens	PLCE1	phospholipase C epsilon 1	GO:0006651 diacylglycerol biosynthetic process;GO:0046339 diacylglycerol metabolic process;GO:0010592 positive regulation of lamellipodium assembly		ENZYME proteins:Hydrolases; Disease related genes; Enzymes; RAS pathway related proteins; Potential drug targets; Predicted intracellular proteins	Cytosol (Supported)		(M269)PID RAS PATHWAY		0.0	0.0	0.0	0.0	0.0	0.0	0.0	0.0	0.0	0.0	0.0	1.0	0.0	0.0	0.0	1.0	1.0	0.0	1.0	0.0
ENSDARG00000104658						None	None	None	None	None	None	None	None	None	nan	nan	nan	nan	nan	nan	nan	nan	nan	nan	nan	nan	nan	nan	nan	nan	nan	nan	nan	nan
ENSDARG00000011219	378972	ensembl_gene_id	D. rerio	208	H. sapiens	AKT2	AKT serine/threonine kinase 2	GO:0071486 cellular response to high light intensity;GO:0097473 retinal rod cell apoptotic process;GO:0009644 response to high light intensity	AGC Ser/Thr protein kinase family	Kinases:AGC Ser/Thr protein kinases; Disease related genes; ENZYME proteins:Transferases; Enzymes; RAS pathway related proteins; Cancer-related genes:Candidate cancer biomarkers; Potential drug targets; Predicted intracellular proteins	Cytosol;Nucleoplasm;Vesicles (Supported)	N-[(1S)-2-amino-1-phenylethyl]-5-(1H-pyrrolo[2,3-b]pyridin-4-yl)thiophene-2-carboxamide; 4-(4-CHLOROPHENYL)-4-[4-(1H-PYRAZOL-4-YL)PHENYL]PIPERIDINE; ISOQUINOLINE-5-SULFONIC ACID (2-(2-(4-CHLOROBENZYLOXY)ETHYLAMINO)ETHYL)AMIDE; (2S)-1-(1H-INDOL-3-YL)-3-{[5-(3-METHYL-1H-INDAZOL-5-YL)PYRIDIN-3-YL]OXY}PROPAN-2-AMINE	(M12771)SA PTEN PATHWAY; (M18895)SA TRKA RECEPTOR; (M184)PID ECADHERIN KERATINOCYTE PATHWAY	(M5909)HALLMARK MYOGENESIS; (M5915)HALLMARK APICAL JUNCTION; (M5953)HALLMARK KRAS SIGNALING UP	1.0	1.0	0.0	1.0	0.0	0.0	0.0	0.0	1.0	0.0	1.0	0.0	0.0	0.0	0.0	1.0	0.0	0.0	1.0	1.0
ENSDARG00000020176	566513	ensembl_gene_id	D. rerio	6667	H. sapiens	SP1	Sp1 transcription factor	GO:1904828 positive regulation of hydrogen sulfide biosynthetic process;GO:0051176 positive regulation of sulfur metabolic process;GO:1904826 regulation of hydrogen sulfide biosynthetic process		Transcription factors:Zinc-coordinating DNA-binding domains; Predicted intracellular proteins; Cancer-related genes:Candidate cancer biomarkers	Nucleoplasm (Enhanced)		(M234)PID IL2 STAT5 PATHWAY; (M44)PID HIF2PATHWAY; (M65)PID FRA PATHWAY	(M5939)HALLMARK P53 PATHWAY	1.0	1.0	0.0	1.0	1.0	0.0	1.0	0.0	0.0	0.0	0.0	0.0	0.0	0.0	0.0	0.0	0.0	0.0	1.0	1.0
ENSDARG00000060597	791141	ensembl_gene_id	D. rerio	5290	H. sapiens	PIK3CA	phosphatidylinositol-4,5-bisphosphate 3-kinase catalytic subunit alpha	GO:0071464 cellular response to hydrostatic pressure;GO:0044028 DNA hypomethylation;GO:0044029 hypomethylation of CpG island	Atypical: PI3/PI4-kinase family	Cancer-related genes:Mutational cancer driver genes; Disease related genes; ENZYME proteins:Transferases; Cancer-related genes:Mutated cancer genes; Enzymes; FDA approved drug targets:Small molecule drugs; Kinases:Atypical kinases; RAS pathway related proteins; Cancer-related genes:Candidate cancer biomarkers; Predicted intracellular proteins	Cytosol (Supported); Additional: Mitochondria	ATP; Caffeine; XL765; Wortmannin; Pilaralisib; Alpelisib; Copanlisib	(M135)PID IL5 PATHWAY; (M26)PID NFKAPPAB ATYPICAL PATHWAY; (M12771)SA PTEN PATHWAY	(M5921)HALLMARK COMPLEMENT	1.0	1.0	1.0	1.0	1.0	1.0	0.0	0.0	0.0	0.0	0.0	0.0	1.0	1.0	0.0	0.0	1.0	0.0	1.0	0.0
ENSDARG00000003403	563094	ensembl_gene_id	D. rerio	10178	H. sapiens	TENM1	teneurin transmembrane protein 1	GO:0006359 regulation of transcription by RNA polymerase III;GO:0051491 positive regulation of filopodium assembly;GO:0051489 regulation of filopodium assembly							0.0	0.0	0.0	0.0	0.0	0.0	0.0	0.0	0.0	0.0	0.0	0.0	0.0	0.0	0.0	0.0	1.0	0.0	0.0	0.0
ENSDARG00000052072	574005	ensembl_gene_id	D. rerio	4189	H. sapiens	DNAJB9	DnaJ heat shock protein family (Hsp40) member B9	GO:1903895 negative regulation of IRE1-mediated unfolded protein response;GO:1903894 regulation of IRE1-mediated unfolded protein response;GO:1900102 negative regulation of endoplasmic reticulum unfolded protein response		Predicted intracellular proteins	Cytosol;Endoplasmic reticulum (Approved)			(M5908)HALLMARK ANDROGEN RESPONSE; (M5922)HALLMARK UNFOLDED PROTEIN RESPONSE; (M5905)HALLMARK ADIPOGENESIS	0.0	0.0	0.0	1.0	0.0	0.0	0.0	0.0	1.0	0.0	0.0	0.0	0.0	0.0	0.0	0.0	1.0	0.0	0.0	0.0
ENSDARG00000033327	494130	ensembl_gene_id	D. rerio	219699	H. sapiens	UNC5B	unc-5 netrin receptor B	GO:0033564 anterior/posterior axon guidance;GO:0038007 netrin-activated signaling pathway;GO:1901099 negative regulation of signal transduction in absence of ligand					(M108)PID NETRIN PATHWAY		1.0	0.0	0.0	0.0	0.0	0.0	0.0	0.0	0.0	0.0	0.0	0.0	0.0	0.0	0.0	0.0	0.0	0.0	0.0	0.0
ENSDARG00000021201	30260	ensembl_gene_id	D. rerio	2018	H. sapiens	EMX2	empty spiracles homeobox 2	GO:0021796 cerebral cortex regionalization;GO:0072197 ureter morphogenesis;GO:0021978 telencephalon regionalization		Predicted intracellular proteins; Disease related genes; Transcription factors:Helix-turn-helix domains	Nucleoplasm (Approved)				0.0	0.0	0.0	0.0	0.0	0.0	0.0	0.0	0.0	0.0	0.0	0.0	0.0	0.0	0.0	0.0	0.0	0.0	0.0	0.0
ENSDARG00000008575	100150726	ensembl_gene_id	D. rerio	1130	H. sapiens	LYST	lysosomal trafficking regulator	GO:0033364 mast cell secretory granule organization;GO:0032510 endosome to lysosome transport via multivesicular body sorting pathway;GO:0001562 response to protozoan		Disease related genes; Predicted intracellular proteins	Nucleoplasm (Supported); Additional: Centriolar satellite;Plasma membrane				0.0	0.0	0.0	0.0	0.0	0.0	0.0	0.0	0.0	0.0	0.0	0.0	0.0	0.0	0.0	0.0	0.0	0.0	0.0	0.0
ENSDARG00000007461	570262	ensembl_gene_id	D. rerio	57522	H. sapiens	SRGAP1	SLIT-ROBO Rho GTPase activating protein 1	GO:0051056 regulation of small GTPase mediated signal transduction;GO:0030336 negative regulation of cell migration;GO:2000146 negative regulation of cell motility		Disease related genes; Predicted intracellular proteins	Cytosol (Approved)		(M68)PID RHOA REG PATHWAY		1.0	0.0	0.0	0.0	0.0	0.0	0.0	0.0	0.0	0.0	0.0	0.0	0.0	0.0	0.0	0.0	0.0	0.0	0.0	0.0
ENSDARG00000071413	564723	ensembl_gene_id	D. rerio	54531	H. sapiens	MIER2	MIER family member 2	GO:0016575 histone deacetylation;GO:0006476 protein deacetylation;GO:0035601 protein deacylation		Transcription factors:Helix-turn-helix domains; Predicted intracellular proteins	Cytosol;Nucleoplasm (Approved)				0.0	0.0	0.0	0.0	0.0	0.0	0.0	0.0	0.0	0.0	0.0	0.0	0.0	0.0	0.0	0.0	0.0	0.0	0.0	0.0
ENSDARG00000015592	100005110	ensembl_gene_id	D. rerio	165257	H. sapiens	C1QL2	complement C1q like 2			Predicted secreted proteins			(M5880)NABA ECM AFFILIATED; (M5885)NABA MATRISOME ASSOCIATED; (M5889)NABA MATRISOME		0.0	0.0	0.0	0.0	0.0	0.0	0.0	0.0	0.0	0.0	0.0	0.0	0.0	0.0	0.0	0.0	0.0	0.0	0.0	0.0
ENSDARG00000035074	503732	ensembl_gene_id	D. rerio	51750	H. sapiens	RTEL1	regulator of telomere elongation helicase 1	GO:0000732 strand displacement;GO:1904535 positive regulation of telomeric loop disassembly;GO:1902990 mitotic telomere maintenance via semi-conservative replication		ENZYME proteins:Hydrolases; Disease related genes; Enzymes; Potential drug targets; Predicted intracellular proteins	Nuclear bodies;Nuclear speckles (Approved)				0.0	0.0	0.0	0.0	0.0	0.0	0.0	0.0	0.0	0.0	0.0	0.0	1.0	0.0	0.0	0.0	1.0	0.0	0.0	0.0
ENSDARG00000004049	554102	ensembl_gene_id	D. rerio			None	None	None	None	None	None	None	None	None	nan	nan	nan	nan	nan	nan	nan	nan	nan	nan	nan	nan	nan	nan	nan	nan	nan	nan	nan	nan
ENSDARG00000021739	768198	ensembl_gene_id	D. rerio	54800	H. sapiens	KLHL24	kelch like family member 24	GO:2000312 regulation of kainate selective glutamate receptor activity;GO:0045109 intermediate filament organization;GO:0045104 intermediate filament cytoskeleton organization		Disease related genes; Predicted intracellular proteins				(M5891)HALLMARK HYPOXIA	0.0	0.0	1.0	0.0	0.0	0.0	0.0	0.0	0.0	0.0	0.0	0.0	0.0	0.0	0.0	0.0	0.0	0.0	0.0	0.0
ENSDARG00000052114	570024	ensembl_gene_id	D. rerio	64784	H. sapiens	CRTC3	CREB regulated transcription coactivator 3	GO:0032793 positive regulation of CREB transcription factor activity;GO:0043951 negative regulation of cAMP-mediated signaling;GO:0050995 negative regulation of lipid catabolic process		Cancer-related genes:Mutational cancer driver genes; Predicted intracellular proteins	Nucleoplasm (Enhanced); Additional: Cytosol				0.0	0.0	1.0	0.0	0.0	1.0	0.0	0.0	0.0	0.0	0.0	0.0	0.0	0.0	0.0	0.0	0.0	0.0	0.0	1.0
ENSDARG00000102142	793465	ensembl_gene_id	D. rerio			None	None	None	None	None	None	None	None	None	nan	nan	nan	nan	nan	nan	nan	nan	nan	nan	nan	nan	nan	nan	nan	nan	nan	nan	nan	nan
ENSDARG00000075296	570133	ensembl_gene_id	D. rerio	128876	H. sapiens	FAM83C	family with sequence similarity 83 member C	GO:0007165 signal transduction;GO:0023052 signaling;GO:0007154 cell communication		Predicted intracellular proteins					0.0	0.0	0.0	0.0	0.0	0.0	0.0	0.0	0.0	0.0	0.0	0.0	0.0	0.0	0.0	0.0	0.0	0.0	0.0	0.0
ENSDARG00000060395	100007612	ensembl_gene_id	D. rerio			None	None	None	None	None	None	None	None	None	nan	nan	nan	nan	nan	nan	nan	nan	nan	nan	nan	nan	nan	nan	nan	nan	nan	nan	nan	nan
ENSDARG00000035187	100000720	ensembl_gene_id	D. rerio	25	H. sapiens	ABL1	ABL proto-oncogene 1, non-receptor tyrosine kinase	GO:0002332 transitional stage B cell differentiation;GO:0002333 transitional one stage B cell differentiation;GO:1904531 positive regulation of actin filament binding	Tyr protein kinase family	Cancer-related genes:Mutational cancer driver genes; Disease related genes; ENZYME proteins:Transferases; Enzymes; FDA approved drug targets:Small molecule drugs; Kinases:Tyr protein kinases; RAS pathway related proteins; Cancer-related genes:Candidate cancer biomarkers; Predicted intracellular proteins	Nucleoplasm (Enhanced); Additional: Nuclear bodies	ATP; Imatinib; Dasatinib; N-[4-Methyl-3-[[4-(3-Pyridinyl)-2-Pyrimidinyl]Amino]Phenyl]-3-Pyridinecarboxamide; Nilotinib; XL228; Bosutinib; 2-{[(6-OXO-1,6-DIHYDROPYRIDIN-3-YL)METHYL]AMINO}-N-[4-PROPYL-3-(TRIFLUOROMETHYL)PHENYL]BENZAMIDE; 1-[4-(PYRIDIN-4-YLOXY)PHENYL]-3-[3-(TRIFLUOROMETHYL)PHENYL]UREA; Myristic acid; PD-166326; 5-[3-(2-METHOXYPHENYL)-1H-PYRROLO[2,3-B]PYRIDIN-5-YL]-N,N-DIMETHYLPYRIDI…	(M163)PID LIS1 PATHWAY; (M84)PID ATM PATHWAY; (M142)PID AJDISS 2PATHWAY	(M5893)HALLMARK MITOTIC SPINDLE; (M5901)HALLMARK G2M CHECKPOINT	1.0	0.0	1.0	1.0	1.0	1.0	0.0	0.0	0.0	1.0	0.0	1.0	0.0	0.0	0.0	1.0	1.0	0.0	0.0	0.0
ENSDARG00000025468	323563	ensembl_gene_id	D. rerio	665	H. sapiens	BNIP3L	BCL2 interacting protein 3 like	GO:0035694 mitochondrial protein catabolic process;GO:0010917 negative regulation of mitochondrial membrane potential;GO:0045837 negative regulation of membrane potential		Transporters:Transporter channels and pores; Cancer-related genes:Candidate cancer biomarkers	Mitochondria (Supported); Additional: Nuclear speckles		(M145)PID P53 DOWNSTREAM PATHWAY	(M5902)HALLMARK APOPTOSIS; (M5891)HALLMARK HYPOXIA; (M5945)HALLMARK HEME METABOLISM	1.0	1.0	1.0	0.0	0.0	1.0	0.0	0.0	1.0	0.0	1.0	0.0	0.0	1.0	0.0	1.0	0.0	0.0	0.0	0.0
ENSDARG00000013935						None	None	None	None	None	None	None	None	None	nan	nan	nan	nan	nan	nan	nan	nan	nan	nan	nan	nan	nan	nan	nan	nan	nan	nan	nan	nan
ENSDARG00000020759	30396	ensembl_gene_id	D. rerio	1997	H. sapiens	ELF1	E74 like ETS transcription factor 1	GO:0050855 regulation of B cell receptor signaling pathway;GO:0050854 regulation of antigen receptor-mediated signaling pathway;GO:0050853 B cell receptor signaling pathway		Transcription factors:Helix-turn-helix domains; Predicted intracellular proteins	Nucleoplasm (Supported)		(M234)PID IL2 STAT5 PATHWAY; (M92)PID ANGIOPOIETIN RECEPTOR PATHWAY; (M279)PID RB 1PATHWAY	(M5911)HALLMARK INTERFERON ALPHA RESPONSE; (M5906)HALLMARK ESTROGEN RESPONSE EARLY	0.0	0.0	0.0	0.0	0.0	0.0	0.0	0.0	0.0	0.0	0.0	0.0	0.0	0.0	0.0	0.0	0.0	0.0	0.0	0.0
ENSDARG00000099220						None	None	None	None	None	None	None	None	None	nan	nan	nan	nan	nan	nan	nan	nan	nan	nan	nan	nan	nan	nan	nan	nan	nan	nan	nan	nan
ENSDARG00000027497	796739	ensembl_gene_id	D. rerio	22983	H. sapiens	MAST1	microtubule associated serine/threonine kinase 1	GO:0018105 peptidyl-serine phosphorylation;GO:0018209 peptidyl-serine modification;GO:0007420 brain development	AGC Ser/Thr protein kinase family	ENZYME proteins:Transferases; Kinases:AGC Ser/Thr protein kinases; Enzymes; Predicted intracellular proteins	Vesicles (Supported); Additional: Cytosol	Fostamatinib			0.0	0.0	0.0	0.0	0.0	0.0	0.0	0.0	0.0	0.0	0.0	0.0	0.0	0.0	0.0	0.0	0.0	0.0	0.0	0.0
ENSDARG00000089665						None	None	None	None	None	None	None	None	None	nan	nan	nan	nan	nan	nan	nan	nan	nan	nan	nan	nan	nan	nan	nan	nan	nan	nan	nan	nan
ENSDARG00000032838	560719	ensembl_gene_id	D. rerio	114	H. sapiens	ADCY8	adenylate cyclase 8	GO:0071315 cellular response to morphine;GO:0071317 cellular response to isoquinoline alkaloid;GO:1900454 positive regulation of long-term synaptic depression		Enzymes; ENZYME proteins:Lyases; Predicted intracellular proteins			(M56)PID LPA4 PATHWAY; (M8)PID ENDOTHELIN PATHWAY; (M15)PID LYSOPHOSPHOLIPID PATHWAY		0.0	1.0	1.0	0.0	1.0	0.0	0.0	0.0	0.0	0.0	0.0	1.0	0.0	0.0	0.0	1.0	1.0	1.0	1.0	0.0
ENSDARG00000020866	570354	ensembl_gene_id	D. rerio	337	H. sapiens	APOA4	apolipoprotein A4	GO:0006982 response to lipid hydroperoxide;GO:0034444 regulation of plasma lipoprotein oxidation;GO:0034445 negative regulation of plasma lipoprotein oxidation		Predicted secreted proteins; Candidate cardiovascular disease genes	Vesicles (Approved)	Zinc; Copper; Zinc acetate		(M5921)HALLMARK COMPLEMENT	0.0	0.0	0.0	0.0	1.0	0.0	0.0	0.0	1.0	0.0	0.0	0.0	1.0	0.0	0.0	1.0	0.0	0.0	0.0	1.0
ENSDARG00000042249	564713	ensembl_gene_id	D. rerio	55691	H. sapiens	FRMD4A	FERM domain containing 4A	GO:0090162 establishment of epithelial cell polarity;GO:0050709 negative regulation of protein secretion;GO:0002792 negative regulation of peptide secretion		Disease related genes; Predicted intracellular proteins	Golgi apparatus (Approved); Additional: Nucleoplasm				0.0	0.0	0.0	0.0	0.0	0.0	0.0	0.0	0.0	0.0	0.0	0.0	0.0	0.0	0.0	0.0	0.0	0.0	0.0	0.0
ENSDARG00000089390	101887155	ensembl_gene_id	D. rerio	80339	H. sapiens	PNPLA3	patatin like phospholipase domain containing 3	GO:0036153 triglyceride acyl-chain remodeling;GO:1905243 cellular response to 3,3',5-triiodo-L-thyronine;GO:1905242 response to 3,3',5-triiodo-L-thyronine		ENZYME proteins:Hydrolases; Disease related genes; Enzymes; Potential drug targets; Predicted intracellular proteins	Nucleoli (Approved); Additional: Cytosol;Mitochondria				0.0	0.0	1.0	0.0	0.0	0.0	0.0	0.0	0.0	0.0	0.0	0.0	0.0	0.0	0.0	0.0	0.0	0.0	0.0	1.0
ENSDARG00000100805						None	None	None	None	None	None	None	None	None	nan	nan	nan	nan	nan	nan	nan	nan	nan	nan	nan	nan	nan	nan	nan	nan	nan	nan	nan	nan
ENSDARG00000015502	393392	ensembl_gene_id	D. rerio			None	None	None	None	None	None	None	None	None	nan	nan	nan	nan	nan	nan	nan	nan	nan	nan	nan	nan	nan	nan	nan	nan	nan	nan	nan	nan
ENSDARG00000068128	571470	ensembl_gene_id	D. rerio	84919	H. sapiens	PPP1R15B	protein phosphatase 1 regulatory subunit 15B	GO:1903912 negative regulation of endoplasmic reticulum stress-induced eIF2 alpha phosphorylation;GO:1903898 negative regulation of PERK-mediated unfolded protein response;GO:0036492 eiF2alpha phosphorylation in response to endoplasmic reticulum stress		Disease related genes; Predicted intracellular proteins	Golgi apparatus (Approved)			(M5905)HALLMARK ADIPOGENESIS	1.0	0.0	0.0	0.0	1.0	0.0	0.0	0.0	0.0	0.0	0.0	0.0	0.0	0.0	0.0	0.0	1.0	0.0	0.0	0.0
ENSDARG00000091408						None	None	None	None	None	None	None	None	None	nan	nan	nan	nan	nan	nan	nan	nan	nan	nan	nan	nan	nan	nan	nan	nan	nan	nan	nan	nan
ENSDARG00000101279	30292	ensembl_gene_id	D. rerio			None	None	None	None	None	None	None	None	None	nan	nan	nan	nan	nan	nan	nan	nan	nan	nan	nan	nan	nan	nan	nan	nan	nan	nan	nan	nan
ENSDARG00000076001	798876	ensembl_gene_id	D. rerio	23396	H. sapiens	PIP5K1C	phosphatidylinositol-4-phosphate 5-kinase type 1 gamma	GO:0072583 clathrin-dependent endocytosis;GO:0046854 phosphatidylinositol phosphorylation;GO:0048488 synaptic vesicle endocytosis		Disease related genes; ENZYME proteins:Transferases; Enzymes; Potential drug targets; Predicted intracellular proteins	Cytosol;Nucleoplasm (Approved)		(M72)PID NECTIN PATHWAY; (M266)PID NCADHERIN PATHWAY; (M127)PID ERBB1 RECEPTOR PROXIMAL PATHWAY		1.0	0.0	1.0	0.0	0.0	0.0	0.0	0.0	0.0	0.0	0.0	0.0	0.0	0.0	0.0	1.0	0.0	0.0	1.0	0.0
ENSDARG00000011404	386707	ensembl_gene_id	D. rerio	2237	H. sapiens	FEN1	flap structure-specific endonuclease 1	GO:0043137 DNA replication, removal of RNA primer;GO:0033567 DNA replication, Okazaki fragment processing;GO:0006273 lagging strand elongation		Predicted intracellular proteins; Cancer-related genes:Candidate cancer biomarkers	Nucleoplasm (Enhanced); Additional: Nucleoli	Iron; Ferrous gluconate; Ferrous succinate; Ferrous ascorbate; Ferrous fumarate; Ferrous glycine sulfate		(M5898)HALLMARK DNA REPAIR; (M5941)HALLMARK UV RESPONSE UP	1.0	0.0	0.0	0.0	0.0	0.0	0.0	0.0	0.0	0.0	0.0	0.0	0.0	0.0	0.0	1.0	0.0	0.0	0.0	0.0
ENSDARG00000102585	100332943	ensembl_gene_id	D. rerio			None	None	None	None	None	None	None	None	None	nan	nan	nan	nan	nan	nan	nan	nan	nan	nan	nan	nan	nan	nan	nan	nan	nan	nan	nan	nan
ENSDARG00000101366	100004124	ensembl_gene_id	D. rerio	2825	H. sapiens	GPR1	G protein-coupled receptor 1	GO:0007218 neuropeptide signaling pathway;GO:0007186 G protein-coupled receptor signaling pathway;GO:0007165 signal transduction		G-protein coupled receptors:GPCRs excl olfactory receptors; Predicted intracellular proteins	Plasma membrane (Supported); Additional: Nucleoplasm;Vesicles				0.0	0.0	0.0	0.0	0.0	0.0	0.0	0.0	0.0	0.0	0.0	0.0	0.0	0.0	0.0	0.0	0.0	0.0	0.0	0.0
ENSDARG00000080987						None	None	None	None	None	None	None	None	None	nan	nan	nan	nan	nan	nan	nan	nan	nan	nan	nan	nan	nan	nan	nan	nan	nan	nan	nan	nan
ENSDARG00000016527	562461	ensembl_gene_id	D. rerio	85441	H. sapiens	HELZ2	helicase with zinc finger 2	GO:0000184 nuclear-transcribed mRNA catabolic process, nonsense-mediated decay;GO:0090501 RNA phosphodiester bond hydrolysis;GO:0000956 nuclear-transcribed mRNA catabolic process		Predicted intracellular proteins				(M5911)HALLMARK INTERFERON ALPHA RESPONSE; (M5913)HALLMARK INTERFERON GAMMA RESPONSE	1.0	0.0	1.0	0.0	0.0	0.0	0.0	0.0	0.0	0.0	0.0	0.0	0.0	0.0	0.0	0.0	0.0	0.0	0.0	1.0
ENSDARG00000055162	386660	ensembl_gene_id	D. rerio	22882	H. sapiens	ZHX2	zinc fingers and homeoboxes 2	GO:0060040 retinal bipolar neuron differentiation;GO:0060042 retina morphogenesis in camera-type eye;GO:0003407 neural retina development		Transcription factors:Helix-turn-helix domains; Predicted intracellular proteins	Nucleoplasm (Enhanced)				1.0	0.0	0.0	0.0	0.0	0.0	0.0	0.0	0.0	0.0	0.0	0.0	0.0	0.0	0.0	0.0	0.0	0.0	0.0	0.0
ENSDARG00000019501	107992390	ensembl_gene_id	D. rerio	399909	H. sapiens	PCNX3	pecanex 3				Cytosol (Approved)				0.0	0.0	0.0	0.0	0.0	0.0	0.0	0.0	0.0	0.0	0.0	0.0	0.0	0.0	0.0	0.0	0.0	0.0	0.0	0.0
ENSDARG00000052606	768170	ensembl_gene_id	D. rerio	91039	H. sapiens	DPP9	dipeptidyl peptidase 9	GO:0006508 proteolysis;GO:0019538 protein metabolic process;GO:1901564 organonitrogen compound metabolic process		Peptidases:Serine-type peptidases; Enzymes; Predicted intracellular proteins; ENZYME proteins:Hydrolases	Cytosol (Supported)				0.0	0.0	0.0	0.0	0.0	0.0	0.0	0.0	0.0	0.0	0.0	0.0	0.0	0.0	0.0	0.0	0.0	0.0	0.0	0.0
ENSDARG00000055350	553188	ensembl_gene_id	D. rerio	23353	H. sapiens	SUN1	Sad1 and UNC84 domain containing 1	GO:0090292 nuclear matrix anchoring at nuclear membrane;GO:0043578 nuclear matrix organization;GO:0051457 maintenance of protein location in nucleus		Transporters:Transporter channels and pores; Predicted intracellular proteins	Nuclear membrane (Enhanced)				0.0	0.0	0.0	0.0	0.0	0.0	0.0	0.0	0.0	0.0	0.0	0.0	0.0	0.0	0.0	0.0	0.0	0.0	0.0	0.0
ENSDARG00000006467	30456	ensembl_gene_id	D. rerio	27253	H. sapiens	PCDH17	protocadherin 17	GO:1904071 presynaptic active zone assembly;GO:2000807 regulation of synaptic vesicle clustering;GO:1990709 presynaptic active zone organization		Predicted intracellular proteins	Cytosol (Approved); Additional: Plasma membrane;Vesicles				0.0	0.0	0.0	0.0	0.0	0.0	0.0	0.0	0.0	0.0	0.0	0.0	0.0	0.0	0.0	1.0	0.0	0.0	0.0	0.0
ENSDARG00000077068	566957	ensembl_gene_id	D. rerio	64127	H. sapiens	NOD2	nucleotide binding oligomerization domain containing 2	GO:0002805 regulation of antimicrobial peptide biosynthetic process;GO:0002807 positive regulation of antimicrobial peptide biosynthetic process;GO:0002808 regulation of antibacterial peptide biosynthetic process		Disease related genes; FDA approved drug targets:Small molecule drugs; Predicted intracellular proteins	Cytosol;Golgi apparatus (Approved)	Mifamurtide	(M37)PID NFKAPPAB CANONICAL PATHWAY	(M5932)HALLMARK INFLAMMATORY RESPONSE	1.0	0.0	0.0	0.0	1.0	1.0	0.0	0.0	1.0	1.0	0.0	0.0	0.0	0.0	0.0	0.0	1.0	0.0	0.0	1.0
ENSDARG00000055154	568512	ensembl_gene_id	D. rerio	6546	H. sapiens	SLC8A1	solute carrier family 8 member A1	GO:0098735 positive regulation of the force of heart contraction;GO:0044557 relaxation of smooth muscle;GO:0071313 cellular response to caffeine		Transporters:Electrochemical Potential-driven transporters; FDA approved drug targets:Small molecule drugs; Predicted intracellular proteins	Nucleoplasm;Plasma membrane (Supported)	alpha-Linolenic acid; Icosapent; Dronedarone; Caldaret			0.0	0.0	1.0	1.0	1.0	1.0	0.0	0.0	0.0	0.0	1.0	1.0	0.0	0.0	0.0	1.0	1.0	0.0	0.0	0.0
ENSDARG00000037008	567403	ensembl_gene_id	D. rerio	26580	H. sapiens	BSCL2	BSCL2 lipid droplet biogenesis associated, seipin	GO:0140042 lipid droplet formation;GO:0050995 negative regulation of lipid catabolic process;GO:0034389 lipid droplet organization		Disease related genes; Predicted intracellular proteins					0.0	0.0	0.0	0.0	0.0	1.0	0.0	0.0	0.0	0.0	0.0	0.0	0.0	0.0	0.0	0.0	0.0	0.0	0.0	1.0
ENSDARG00000104809	415098	ensembl_gene_id	D. rerio	116447	H. sapiens	TOP1MT	DNA topoisomerase I mitochondrial	GO:0006265 DNA topological change;GO:0006260 DNA replication;GO:0071103 DNA conformation change		ENZYME proteins:Isomerase; Enzymes; FDA approved drug targets:Small molecule drugs; Predicted intracellular proteins	Mitochondria (Supported)	Irinotecan; Topotecan			0.0	0.0	0.0	0.0	0.0	0.0	0.0	0.0	0.0	0.0	0.0	0.0	0.0	0.0	0.0	0.0	0.0	0.0	0.0	0.0
ENSDARG00000099390						None	None	None	None	None	None	None	None	None	nan	nan	nan	nan	nan	nan	nan	nan	nan	nan	nan	nan	nan	nan	nan	nan	nan	nan	nan	nan
ENSDARG00000101627	373100	ensembl_gene_id	D. rerio	6745	H. sapiens	SSR1	signal sequence receptor subunit 1	GO:0036498 IRE1-mediated unfolded protein response;GO:0006613 cotranslational protein targeting to membrane;GO:0030968 endoplasmic reticulum unfolded protein response			Endoplasmic reticulum (Supported)			(M5922)HALLMARK UNFOLDED PROTEIN RESPONSE; (M5924)HALLMARK MTORC1 SIGNALING	1.0	0.0	0.0	0.0	0.0	0.0	0.0	0.0	0.0	0.0	0.0	0.0	0.0	0.0	0.0	0.0	0.0	0.0	0.0	0.0
ENSDARG00000015732	558687	ensembl_gene_id	D. rerio			None	None	None	None	None	None	None	None	None	nan	nan	nan	nan	nan	nan	nan	nan	nan	nan	nan	nan	nan	nan	nan	nan	nan	nan	nan	nan
ENSDARG00000070495	557811	ensembl_gene_id	D. rerio	90167	H. sapiens	FRMD7	FERM domain containing 7	GO:0010592 positive regulation of lamellipodium assembly;GO:0051497 negative regulation of stress fiber assembly;GO:0032232 negative regulation of actin filament bundle assembly		Disease related genes; Cancer-related genes:Mutated cancer genes; Predicted intracellular proteins	Cytosol;Plasma membrane (Supported); Additional: Nucleoplasm				0.0	0.0	0.0	0.0	0.0	0.0	0.0	0.0	0.0	0.0	0.0	0.0	1.0	0.0	0.0	0.0	0.0	0.0	0.0	0.0
ENSDARG00000090930	556805	ensembl_gene_id	D. rerio			None	None	None	None	None	None	None	None	None	nan	nan	nan	nan	nan	nan	nan	nan	nan	nan	nan	nan	nan	nan	nan	nan	nan	nan	nan	nan
ENSDARG00000031100	387591	ensembl_gene_id	D. rerio	10625	H. sapiens	IVNS1ABP	influenza virus NS1A binding protein	GO:0006383 transcription by RNA polymerase III;GO:0031397 negative regulation of protein ubiquitination;GO:1903321 negative regulation of protein modification by small protein conjugation or removal		Predicted intracellular proteins	Cytosol (Supported)				0.0	1.0	0.0	0.0	0.0	0.0	0.0	0.0	0.0	1.0	0.0	0.0	0.0	0.0	0.0	0.0	0.0	0.0	0.0	0.0
ENSDARG00000104868	563670	ensembl_gene_id	D. rerio			None	None	None	None	None	None	None	None	None	nan	nan	nan	nan	nan	nan	nan	nan	nan	nan	nan	nan	nan	nan	nan	nan	nan	nan	nan	nan
ENSDARG00000079348	110438919	ensembl_gene_id	D. rerio	2904	H. sapiens	GRIN2B	glutamate ionotropic receptor NMDA type subunit 2B	GO:1902951 negative regulation of dendritic spine maintenance;GO:0098976 excitatory chemical synaptic transmission;GO:1902950 regulation of dendritic spine maintenance		Disease related genes; RAS pathway related proteins; FDA approved drug targets:Small molecule drugs; Predicted intracellular proteins		Glutamic acid; Meperidine; Haloperidol; Felbamate; Tenocyclidine; Taurine; EVT-101; Lumateperone; Acetylcysteine; Ifenprodil; Esketamine	(M69)PID REELIN PATHWAY; (M13)PID ERBB4 PATHWAY		1.0	1.0	1.0	0.0	1.0	0.0	0.0	0.0	0.0	0.0	0.0	1.0	1.0	0.0	0.0	1.0	0.0	1.0	0.0	0.0
ENSDARG00000077304	494073	ensembl_gene_id	D. rerio	2078	H. sapiens	ERG	ETS transcription factor ERG	GO:0045944 positive regulation of transcription by RNA polymerase II;GO:0045893 positive regulation of transcription, DNA-templated;GO:1903508 positive regulation of nucleic acid-templated transcription		Cancer-related genes; Disease related genes; Predicted intracellular proteins; Transcription factors:Helix-turn-helix domains	Nucleoplasm (Approved); Additional: Cytosol				0.0	0.0	0.0	1.0	0.0	0.0	0.0	0.0	0.0	0.0	0.0	0.0	0.0	0.0	0.0	0.0	0.0	0.0	0.0	0.0
ENSDARG00000104981	100329687	ensembl_gene_id	D. rerio			None	None	None	None	None	None	None	None	None	nan	nan	nan	nan	nan	nan	nan	nan	nan	nan	nan	nan	nan	nan	nan	nan	nan	nan	nan	nan
ENSDARG00000036944	569530	ensembl_gene_id	D. rerio			None	None	None	None	None	None	None	None	None	nan	nan	nan	nan	nan	nan	nan	nan	nan	nan	nan	nan	nan	nan	nan	nan	nan	nan	nan	nan
ENSDARG00000017590	402904	ensembl_gene_id	D. rerio	56954	H. sapiens	NIT2	nitrilase family member 2	GO:0006528 asparagine metabolic process;GO:0006107 oxaloacetate metabolic process;GO:0006541 glutamine metabolic process		Enzymes; Predicted intracellular proteins; ENZYME proteins:Hydrolases	Cytosol (Supported); Additional: Centrosome				0.0	0.0	0.0	0.0	0.0	0.0	0.0	0.0	0.0	0.0	0.0	0.0	0.0	0.0	0.0	0.0	0.0	0.0	0.0	1.0
ENSDARG00000054690	100001249	ensembl_gene_id	D. rerio			None	None	None	None	None	None	None	None	None	nan	nan	nan	nan	nan	nan	nan	nan	nan	nan	nan	nan	nan	nan	nan	nan	nan	nan	nan	nan
ENSDARG00000079420	100301982	ensembl_gene_id	D. rerio	1803	H. sapiens	DPP4	dipeptidyl peptidase 4	GO:0036343 psychomotor behavior;GO:0071623 negative regulation of granulocyte chemotaxis;GO:0090024 negative regulation of neutrophil chemotaxis		CD markers; ENZYME proteins:Hydrolases; Enzymes; FDA approved drug targets:Small molecule drugs; Peptidases:Serine-type peptidases; Predicted secreted proteins; Predicted intracellular proteins		Atorvastatin; Sitagliptin; 2-Amino-3-Methyl-1-Pyrrolidin-1-Yl-Butan-1-One; 5-(Aminomethyl)-6-(2,4-Dichlorophenyl)-2-(3,5-Dimethoxyphenyl)Pyrimidin-4-Amine; (2s)-Pyrrolidin-2-Ylmethylamine; 4-Iodo-L-phenylalanine; Diisopropylphosphono Group; 1-(1-phenylcyclopentyl)methylamine; (S)-2-[(R)-3-amino-4-(2-fluorophenyl)butyryl]-1,2,3,4-tetrahydroisoquinoline-3-carboxamide; Vildagliptin; PSN9301; AMG-222…		(M5957)HALLMARK PANCREAS BETA CELLS; (M5946)HALLMARK COAGULATION; (M5921)HALLMARK COMPLEMENT	0.0	0.0	0.0	1.0	0.0	0.0	0.0	0.0	0.0	0.0	0.0	0.0	1.0	1.0	0.0	1.0	0.0	0.0	0.0	0.0
ENSDARG00000101831	403019	ensembl_gene_id	D. rerio	79192	H. sapiens	IRX1	iroquois homeobox 1	GO:0072272 proximal/distal pattern formation involved in metanephric nephron development;GO:0072268 pattern specification involved in metanephros development;GO:0072086 specification of loop of Henle identity		Transcription factors:Helix-turn-helix domains; Predicted intracellular proteins	Golgi apparatus (Approved); Additional: Nucleoplasm				0.0	0.0	0.0	0.0	0.0	0.0	0.0	0.0	0.0	0.0	0.0	0.0	0.0	0.0	0.0	0.0	0.0	0.0	0.0	0.0
ENSDARG00000079283	570019	ensembl_gene_id	D. rerio	10144	H. sapiens	FAM13A	family with sequence similarity 13 member A	GO:0051056 regulation of small GTPase mediated signal transduction;GO:0043547 positive regulation of GTPase activity;GO:0043087 regulation of GTPase activity		Predicted intracellular proteins	Cell Junctions;Cytosol (Approved); Additional: Nucleoli				0.0	0.0	0.0	0.0	0.0	0.0	0.0	0.0	0.0	0.0	0.0	0.0	0.0	0.0	0.0	0.0	0.0	0.0	0.0	0.0
ENSDARG00000005456	406291	ensembl_gene_id	D. rerio	10300	H. sapiens	KATNB1	katanin regulatory subunit B1	GO:0007079 mitotic chromosome movement towards spindle pole;GO:0031117 positive regulation of microtubule depolymerization;GO:0051305 chromosome movement towards spindle pole		Disease related genes; Predicted intracellular proteins	Cytosol;Plasma membrane (Supported); Additional: Microtubules			(M5893)HALLMARK MITOTIC SPINDLE	1.0	0.0	0.0	0.0	0.0	0.0	0.0	0.0	0.0	0.0	0.0	0.0	1.0	1.0	0.0	0.0	0.0	0.0	0.0	0.0
ENSDARG00000051761	793099	ensembl_gene_id	D. rerio	54765	H. sapiens	TRIM44	tripartite motif containing 44	GO:0061944 negative regulation of protein K48-linked ubiquitination;GO:0061945 regulation of protein K48-linked ubiquitination;GO:1902915 negative regulation of protein polyubiquitination		Disease related genes; Predicted intracellular proteins	Vesicles (Approved); Additional: Plasma membrane				0.0	0.0	0.0	0.0	0.0	0.0	0.0	0.0	0.0	1.0	0.0	0.0	0.0	0.0	1.0	0.0	0.0	0.0	0.0	0.0
ENSDARG00000100164	103911019	ensembl_gene_id	D. rerio			None	None	None	None	None	None	None	None	None	nan	nan	nan	nan	nan	nan	nan	nan	nan	nan	nan	nan	nan	nan	nan	nan	nan	nan	nan	nan
ENSDARG00000100084						None	None	None	None	None	None	None	None	None	nan	nan	nan	nan	nan	nan	nan	nan	nan	nan	nan	nan	nan	nan	nan	nan	nan	nan	nan	nan
ENSDARG00000079889	570807	ensembl_gene_id	D. rerio	90102	H. sapiens	PHLDB2	pleckstrin homology like domain family B member 2	GO:1903690 negative regulation of wound healing, spreading of epidermal cells;GO:0110011 regulation of basement membrane organization;GO:1904259 regulation of basement membrane assembly involved in embryonic body morphogenesis		Predicted intracellular proteins	Cytosol;Plasma membrane (Supported)				0.0	0.0	0.0	0.0	0.0	0.0	0.0	0.0	0.0	0.0	0.0	0.0	1.0	0.0	0.0	0.0	0.0	0.0	0.0	0.0
ENSDARG00000045976	796833	ensembl_gene_id	D. rerio	51092	H. sapiens	SIDT2	SID1 transmembrane family member 2	GO:0050657 nucleic acid transport;GO:0050658 RNA transport;GO:0051236 establishment of RNA localization		Transporters:Transporter channels and pores; Predicted intracellular proteins				(M5945)HALLMARK HEME METABOLISM	1.0	0.0	0.0	0.0	0.0	0.0	0.0	0.0	0.0	0.0	0.0	0.0	0.0	0.0	0.0	0.0	0.0	0.0	0.0	0.0
ENSDARG00000089888	565287	ensembl_gene_id	D. rerio	221955	H. sapiens	DAGLB	diacylglycerol lipase beta	GO:0098920 retrograde trans-synaptic signaling by lipid;GO:0098921 retrograde trans-synaptic signaling by endocannabinoid;GO:0071926 endocannabinoid signaling pathway			Plasma membrane (Supported); Additional: Nucleoplasm		(M266)PID NCADHERIN PATHWAY		0.0	1.0	0.0	0.0	0.0	0.0	0.0	0.0	1.0	0.0	0.0	0.0	0.0	0.0	0.0	1.0	0.0	0.0	0.0	1.0
ENSDARG00000074583	793756	ensembl_gene_id	D. rerio	2894	H. sapiens	GRID1	glutamate ionotropic receptor delta type subunit 1	GO:0035235 ionotropic glutamate receptor signaling pathway;GO:0035176 social behavior;GO:0051703 intraspecies interaction between organisms							0.0	0.0	0.0	0.0	0.0	0.0	0.0	0.0	0.0	0.0	0.0	0.0	0.0	0.0	0.0	1.0	0.0	0.0	0.0	0.0
ENSDARG00000061017	568117	ensembl_gene_id	D. rerio	124976	H. sapiens	SPNS2	sphingolipid transporter 2	GO:0048073 regulation of eye pigmentation;GO:0048069 eye pigmentation;GO:0003376 sphingosine-1-phosphate receptor signaling pathway		Transporters:Electrochemical Potential-driven transporters					0.0	0.0	0.0	0.0	0.0	0.0	0.0	0.0	0.0	0.0	0.0	0.0	0.0	0.0	0.0	0.0	0.0	0.0	0.0	0.0
ENSDARG00000089917	100535152	ensembl_gene_id	D. rerio	79628	H. sapiens	SH3TC2	SH3 domain and tetratricopeptide repeats 2	GO:0032287 peripheral nervous system myelin maintenance;GO:0043217 myelin maintenance;GO:0022011 myelination in peripheral nervous system		Disease related genes; Predicted intracellular proteins	Cytosol;Nucleoplasm (Approved)				0.0	0.0	0.0	0.0	0.0	0.0	0.0	0.0	0.0	0.0	0.0	0.0	0.0	0.0	0.0	0.0	0.0	0.0	0.0	0.0
ENSDARG00000020811	572703	ensembl_gene_id	D. rerio	2202	H. sapiens	EFEMP1	EGF containing fibulin extracellular matrix protein 1	GO:0048050 post-embryonic eye morphogenesis;GO:0048563 post-embryonic animal organ morphogenesis;GO:0009886 post-embryonic animal morphogenesis		Disease related genes; Predicted secreted proteins; Predicted intracellular proteins	Mitochondria (Supported)		(M3008)NABA ECM GLYCOPROTEINS; (M5884)NABA CORE MATRISOME; (M5889)NABA MATRISOME	(M5942)HALLMARK UV RESPONSE DN	0.0	0.0	0.0	0.0	0.0	0.0	0.0	0.0	0.0	0.0	0.0	0.0	0.0	0.0	0.0	0.0	0.0	0.0	0.0	0.0
ENSDARG00000080562						None	None	None	None	None	None	None	None	None	nan	nan	nan	nan	nan	nan	nan	nan	nan	nan	nan	nan	nan	nan	nan	nan	nan	nan	nan	nan
ENSDARG00000088844	563776	ensembl_gene_id	D. rerio	10522	H. sapiens	DEAF1	DEAF1 transcription factor	GO:0033599 regulation of mammary gland epithelial cell proliferation;GO:0033598 mammary gland epithelial cell proliferation;GO:0061180 mammary gland epithelium development		Predicted intracellular proteins; Disease related genes; Transcription factors:alpha-Helices exposed by beta-structures	Nucleoplasm (Supported); Additional: Nucleoli fibrillar center				0.0	0.0	0.0	0.0	0.0	0.0	0.0	0.0	0.0	0.0	0.0	0.0	0.0	0.0	0.0	0.0	0.0	0.0	0.0	0.0
ENSDARG00000052279	393155	ensembl_gene_id	D. rerio	29948	H. sapiens	OSGIN1	oxidative stress induced growth inhibitor 1	GO:0030308 negative regulation of cell growth;GO:0045926 negative regulation of growth;GO:0001558 regulation of cell growth		Predicted intracellular proteins	Cytosol;Nucleoplasm (Approved)			(M5939)HALLMARK P53 PATHWAY	0.0	0.0	0.0	0.0	0.0	0.0	0.0	0.0	0.0	0.0	0.0	0.0	0.0	0.0	0.0	0.0	0.0	0.0	0.0	0.0
ENSDARG00000037405	550461	ensembl_gene_id	D. rerio	25988	H. sapiens	HINFP	histone H4 transcription factor	GO:0000083 regulation of transcription involved in G1/S transition of mitotic cell cycle;GO:0045445 myoblast differentiation;GO:0000077 DNA damage checkpoint		Transcription factors:Zinc-coordinating DNA-binding domains; Predicted intracellular proteins					0.0	0.0	0.0	0.0	0.0	0.0	0.0	0.0	0.0	0.0	0.0	0.0	0.0	0.0	0.0	0.0	0.0	0.0	0.0	0.0
ENSDARG00000100152	100535414	ensembl_gene_id	D. rerio			None	None	None	None	None	None	None	None	None	nan	nan	nan	nan	nan	nan	nan	nan	nan	nan	nan	nan	nan	nan	nan	nan	nan	nan	nan	nan
ENSDARG00000003041	100334245	ensembl_gene_id	D. rerio	57162	H. sapiens	PELI1	pellino E3 ubiquitin protein ligase 1	GO:0008592 regulation of Toll signaling pathway;GO:0034141 positive regulation of toll-like receptor 3 signaling pathway;GO:0008063 Toll signaling pathway		ENZYME proteins:Transferases; Enzymes; Predicted intracellular proteins	Intermediate filaments;Nucleoli;Nucleoplasm (Approved)			(M5913)HALLMARK INTERFERON GAMMA RESPONSE	0.0	0.0	0.0	0.0	0.0	0.0	0.0	0.0	1.0	1.0	0.0	0.0	0.0	0.0	0.0	0.0	0.0	0.0	0.0	0.0
ENSDARG00000043902	568984	ensembl_gene_id	D. rerio	2569	H. sapiens	GABRR1	gamma-aminobutyric acid type A receptor subunit rho1	GO:0099505 regulation of presynaptic membrane potential;GO:0007214 gamma-aminobutyric acid signaling pathway;GO:1902476 chloride transmembrane transport		Transporters:Transporter channels and pores; FDA approved drug targets:Small molecule drugs		Lindane; Picrotoxin; Fludiazepam			0.0	1.0	0.0	0.0	0.0	0.0	0.0	0.0	0.0	0.0	0.0	0.0	0.0	0.0	0.0	1.0	0.0	1.0	0.0	0.0
ENSDARG00000019726	560426	ensembl_gene_id	D. rerio	1952	H. sapiens	CELSR2	cadherin EGF LAG seven-pass G-type receptor 2	GO:0033326 cerebrospinal fluid secretion;GO:0021999 neural plate anterior/posterior regionalization;GO:0060897 neural plate regionalization		G-protein coupled receptors:Family 2 (B) receptors; G-protein coupled receptors:GPCRs excl olfactory receptors	Cytosol (Approved)			(M5906)HALLMARK ESTROGEN RESPONSE EARLY; (M5907)HALLMARK ESTROGEN RESPONSE LATE; (M5956)HALLMARK KRAS SIGNALING DN	0.0	0.0	0.0	0.0	0.0	0.0	0.0	0.0	0.0	0.0	0.0	0.0	0.0	0.0	0.0	0.0	0.0	0.0	0.0	0.0
ENSDARG00000060641	572074	ensembl_gene_id	D. rerio	5563	H. sapiens	PRKAA2	protein kinase AMP-activated catalytic subunit alpha 2	GO:1904428 negative regulation of tubulin deacetylation;GO:0062028 regulation of stress granule assembly;GO:0090043 regulation of tubulin deacetylation	CAMK Ser/Thr protein kinase family	ENZYME proteins:Transferases; Transporters:Accessory Factors Involved in Transport; Enzymes; Kinases:CAMK Ser/Thr protein kinases	Nuclear speckles (Supported); Additional: Golgi apparatus		(M87)PID LKB1 PATHWAY; (M237)PID VEGFR1 2 PATHWAY	(M5923)HALLMARK PI3K AKT MTOR SIGNALING	1.0	1.0	1.0	1.0	1.0	1.0	1.0	0.0	1.0	0.0	1.0	0.0	0.0	0.0	0.0	0.0	0.0	1.0	0.0	1.0
ENSDARG00000061042	560267	ensembl_gene_id	D. rerio	9568	H. sapiens	GABBR2	gamma-aminobutyric acid type B receptor subunit 2	GO:0007194 negative regulation of adenylate cyclase activity;GO:0031280 negative regulation of cyclase activity;GO:0051350 negative regulation of lyase activity		Transporters; FDA approved drug targets:Small molecule drugs; G-protein coupled receptors:GPCRs excl olfactory receptors; G-protein coupled receptors:Family 3 (C) receptors; Predicted intracellular proteins		Baclofen; gamma-Aminobutyric acid; SGS-742; Arbaclofen; Arbaclofen Placarbil			0.0	0.0	0.0	0.0	0.0	0.0	0.0	0.0	0.0	0.0	0.0	0.0	0.0	0.0	0.0	1.0	0.0	1.0	0.0	0.0
ENSDARG00000102645	100101645	ensembl_gene_id	D. rerio			None	None	None	None	None	None	None	None	None	nan	nan	nan	nan	nan	nan	nan	nan	nan	nan	nan	nan	nan	nan	nan	nan	nan	nan	nan	nan
ENSDARG00000098237	571786	ensembl_gene_id	D. rerio	84467	H. sapiens	FBN3	fibrillin 3	GO:0009653 anatomical structure morphogenesis;GO:0048856 anatomical structure development;GO:0032502 developmental process		Predicted secreted proteins; Predicted intracellular proteins		Calcium citrate; Calcium Phosphate; Calcium phosphate dihydrate	(M3008)NABA ECM GLYCOPROTEINS; (M5884)NABA CORE MATRISOME; (M5889)NABA MATRISOME		0.0	0.0	0.0	0.0	0.0	0.0	0.0	0.0	0.0	0.0	0.0	0.0	0.0	0.0	0.0	0.0	0.0	0.0	0.0	0.0
ENSDARG00000001777	393125	ensembl_gene_id	D. rerio	9631	H. sapiens	NUP155	nucleoporin 155	GO:0036228 protein localization to nuclear inner membrane;GO:0000972 transcription-dependent tethering of RNA polymerase II gene DNA at nuclear periphery;GO:0090435 protein localization to nuclear envelope		Predicted intracellular proteins; Disease related genes; Transporters:Transporter channels and pores; Potential drug targets	Nuclear membrane (Enhanced)				1.0	1.0	1.0	0.0	0.0	0.0	0.0	0.0	0.0	0.0	0.0	0.0	0.0	0.0	0.0	1.0	1.0	0.0	0.0	1.0
ENSDARG00000075567	100331130	ensembl_gene_id	D. rerio	84961	H. sapiens	FBXL20	F-box and leucine rich repeat protein 20	GO:0031146 SCF-dependent proteasomal ubiquitin-dependent protein catabolic process;GO:0000209 protein polyubiquitination;GO:0043687 post-translational protein modification		Predicted intracellular proteins	Microtubules (Supported)				0.0	0.0	0.0	0.0	0.0	0.0	0.0	0.0	1.0	0.0	0.0	0.0	0.0	0.0	0.0	0.0	0.0	0.0	0.0	0.0
ENSDARG00000098497	550286	ensembl_gene_id	D. rerio	3265	H. sapiens	HRAS	HRas proto-oncogene, GTPase	GO:0035900 response to isolation stress;GO:2000630 positive regulation of miRNA metabolic process;GO:0098696 regulation of neurotransmitter receptor localization to postsynaptic specialization membrane		Cancer-related genes:Mutational cancer driver genes; Disease related genes; Cancer-related genes:Mutated cancer genes; RAS pathway related proteins; Cancer-related genes:Candidate cancer biomarkers; Predicted intracellular proteins	Cytosol;Nucleoplasm (Approved)	Hexane-1,6-Diol; Trifluoroethanol; Guanosine-5'-Triphosphate; Guanosine-5'-Diphosphate; N,N'-DIMETHYL-N-(ACETYL)-N'-(7-NITROBENZ-2-OXA-1,3-DIAZOL-4-YL)ETHYLENEDIAMINE	(M134)PID TCR RAS PATHWAY; (M18895)SA TRKA RECEPTOR; (M17200)SA B CELL RECEPTOR COMPLEXES	(M5949)HALLMARK PEROXISOME; (M5923)HALLMARK PI3K AKT MTOR SIGNALING; (M5915)HALLMARK APICAL JUNCTION	1.0	1.0	0.0	1.0	0.0	0.0	1.0	0.0	0.0	0.0	0.0	0.0	0.0	0.0	0.0	1.0	1.0	1.0	1.0	0.0
ENSDARG00000037362	503728	ensembl_gene_id	D. rerio	57758	H. sapiens	SCUBE2	signal peptide, CUB domain and EGF like domain containing 2	GO:0007275 multicellular organism development;GO:0048856 anatomical structure development;GO:0007165 signal transduction		Predicted secreted proteins; Predicted intracellular proteins			(M5883)NABA SECRETED FACTORS; (M5885)NABA MATRISOME ASSOCIATED; (M5889)NABA MATRISOME	(M5907)HALLMARK ESTROGEN RESPONSE LATE	0.0	0.0	0.0	1.0	0.0	0.0	0.0	0.0	0.0	0.0	0.0	0.0	0.0	0.0	0.0	0.0	0.0	0.0	0.0	0.0
ENSDARG00000103054						None	None	None	None	None	None	None	None	None	nan	nan	nan	nan	nan	nan	nan	nan	nan	nan	nan	nan	nan	nan	nan	nan	nan	nan	nan	nan
ENSDARG00000077177	568951	ensembl_gene_id	D. rerio	6416	H. sapiens	MAP2K4	mitogen-activated protein kinase kinase 4	GO:0072709 cellular response to sorbitol;GO:2000672 negative regulation of motor neuron apoptotic process;GO:2000671 regulation of motor neuron apoptotic process	STE Ser/Thr protein kinase family	Kinases:STE Ser/Thr protein kinases; Cancer-related genes:Mutational cancer driver genes; ENZYME proteins:Transferases; Enzymes; Cancer-related genes:Mutated cancer genes; Cancer-related genes:Candidate cancer biomarkers; Predicted intracellular proteins	Nucleoplasm (Approved); Additional: Cell Junctions		(M190)PID TCR JNK PATHWAY; (M267)PID ANTHRAX PATHWAY; (M274)PID LYMPH ANGIOGENESIS PATHWAY		1.0	0.0	0.0	1.0	0.0	1.0	0.0	0.0	0.0	0.0	0.0	0.0	0.0	0.0	0.0	0.0	1.0	0.0	0.0	0.0
ENSDARG00000082960						None	None	None	None	None	None	None	None	None	nan	nan	nan	nan	nan	nan	nan	nan	nan	nan	nan	nan	nan	nan	nan	nan	nan	nan	nan	nan
ENSDARG00000102128	393212	ensembl_gene_id	D. rerio	2059	H. sapiens	EPS8	epidermal growth factor receptor pathway substrate 8	GO:0070358 actin polymerization-dependent cell motility;GO:0051764 actin crosslink formation;GO:1900029 positive regulation of ruffle assembly		Disease related genes; Predicted intracellular proteins	Golgi apparatus (Approved)		(M241)PID RAC1 REG PATHWAY; (M81)PID CDC42 PATHWAY; (M164)PID ERBB1 DOWNSTREAM PATHWAY		0.0	0.0	0.0	0.0	0.0	0.0	0.0	0.0	0.0	0.0	0.0	0.0	1.0	1.0	0.0	0.0	0.0	0.0	0.0	0.0
ENSDARG00000068286	796100	ensembl_gene_id	D. rerio	6545	H. sapiens	SLC7A4	solute carrier family 7 member 4	GO:1990822 basic amino acid transmembrane transport;GO:0015802 basic amino acid transport;GO:0003333 amino acid transmembrane transport		Transporters:Electrochemical Potential-driven transporters; Predicted intracellular proteins		L-Lysine; Arginine			0.0	0.0	0.0	0.0	0.0	0.0	0.0	0.0	0.0	0.0	0.0	0.0	0.0	0.0	0.0	0.0	0.0	0.0	0.0	0.0
ENSDARG00000008674	100003503	ensembl_gene_id	D. rerio	1136	H. sapiens	CHRNA3	cholinergic receptor nicotinic alpha 3 subunit	GO:0014055 acetylcholine secretion, neurotransmission;GO:0014056 regulation of acetylcholine secretion, neurotransmission;GO:0060084 synaptic transmission involved in micturition		FDA approved drug targets:Small molecule drugs; Predicted intracellular proteins		Nicotine; Methadone; Fluoxetine; Dextromethorphan; Levamisole; Ethanol; Amantadine; Pentolinium; Bupropion; Levacetylmethadol; Varenicline; Gantacurium; Epibatidine; Cytisine			0.0	0.0	0.0	0.0	1.0	0.0	0.0	0.0	0.0	0.0	0.0	0.0	0.0	0.0	0.0	1.0	1.0	1.0	0.0	0.0
ENSDARG00000059409	100537809	ensembl_gene_id	D. rerio	215	H. sapiens	ABCD1	ATP binding cassette subfamily D member 1	GO:0036113 very long-chain fatty-acyl-CoA catabolic process;GO:0015916 fatty-acyl-CoA transport;GO:1901337 thioester transport		Disease related genes; Transporters:Primary Active Transporters; Potential drug targets				(M5949)HALLMARK PEROXISOME; (M5948)HALLMARK BILE ACID METABOLISM	1.0	1.0	0.0	0.0	1.0	0.0	0.0	0.0	1.0	0.0	0.0	0.0	0.0	0.0	0.0	1.0	1.0	0.0	0.0	1.0
ENSDARG00000090149						None	None	None	None	None	None	None	None	None	nan	nan	nan	nan	nan	nan	nan	nan	nan	nan	nan	nan	nan	nan	nan	nan	nan	nan	nan	nan
ENSDARG00000102977	445201	ensembl_gene_id	D. rerio			None	None	None	None	None	None	None	None	None	nan	nan	nan	nan	nan	nan	nan	nan	nan	nan	nan	nan	nan	nan	nan	nan	nan	nan	nan	nan
ENSDARG00000004451	114461	ensembl_gene_id	D. rerio	8795	H. sapiens	TNFRSF10B	TNF receptor superfamily member 10b	GO:0036462 TRAIL-activated apoptotic signaling pathway;GO:0007250 activation of NF-kappaB-inducing kinase activity;GO:1902042 negative regulation of extrinsic apoptotic signaling pathway via death domain receptors		CD markers; Disease related genes; Cancer-related genes:Candidate cancer biomarkers		HGS-TR2J; Lexatumumab	(M79)PID TRAIL PATHWAY; (M145)PID P53 DOWNSTREAM PATHWAY		0.0	0.0	0.0	0.0	0.0	1.0	0.0	0.0	0.0	1.0	1.0	0.0	0.0	0.0	0.0	0.0	1.0	0.0	0.0	0.0
ENSDARG00000093048	560966	ensembl_gene_id	D. rerio			None	None	None	None	None	None	None	None	None	nan	nan	nan	nan	nan	nan	nan	nan	nan	nan	nan	nan	nan	nan	nan	nan	nan	nan	nan	nan
ENSDARG00000002231	563806	ensembl_gene_id	D. rerio	8612	H. sapiens	PLPP2	phospholipid phosphatase 2	GO:0006670 sphingosine metabolic process;GO:0046519 sphingoid metabolic process;GO:0034311 diol metabolic process		Enzymes; ENZYME proteins:Hydrolases	Mitochondria (Approved)				0.0	0.0	0.0	0.0	0.0	0.0	0.0	0.0	0.0	0.0	0.0	0.0	0.0	0.0	0.0	0.0	0.0	0.0	1.0	0.0
ENSDARG00000079352	335897	ensembl_gene_id	D. rerio	79595	H. sapiens	SAP130	Sin3A associated protein 130	GO:0000122 negative regulation of transcription by RNA polymerase II;GO:0045892 negative regulation of transcription, DNA-templated;GO:1903507 negative regulation of nucleic acid-templated transcription		Predicted intracellular proteins	Nuclear speckles (Supported)				0.0	0.0	0.0	0.0	0.0	0.0	0.0	0.0	0.0	0.0	0.0	0.0	0.0	0.0	0.0	0.0	0.0	0.0	0.0	0.0
ENSDARG00000059363	100334928	ensembl_gene_id	D. rerio	7048	H. sapiens	TGFBR2	transforming growth factor beta receptor 2	GO:0002649 regulation of tolerance induction to self antigen;GO:0002651 positive regulation of tolerance induction to self antigen;GO:1905315 cell proliferation involved in endocardial cushion morphogenesis	TKL Ser/Thr protein kinase family	Kinases:TKL Ser/Thr protein kinases; Cancer-related genes:Mutational cancer driver genes; Disease related genes; ENZYME proteins:Transferases; Cancer-related genes:Mutated cancer genes; Enzymes; Potential drug targets	Plasma membrane (Supported)	Foreskin fibroblast (neonatal); Foreskin keratinocyte (neonatal); Fostamatinib	(M185)PID ALK1 PATHWAY; (M33)PID GLYPICAN 1PATHWAY; (M53)PID INTEGRIN3 PATHWAY	(M5942)HALLMARK UV RESPONSE DN	0.0	0.0	0.0	1.0	0.0	1.0	0.0	0.0	0.0	0.0	0.0	0.0	0.0	0.0	0.0	0.0	1.0	0.0	0.0	0.0
ENSDARG00000037852	492796	ensembl_gene_id	D. rerio			None	None	None	None	None	None	None	None	None	nan	nan	nan	nan	nan	nan	nan	nan	nan	nan	nan	nan	nan	nan	nan	nan	nan	nan	nan	nan
ENSDARG00000006508	447840	ensembl_gene_id	D. rerio	8395	H. sapiens	PIP5K1B	phosphatidylinositol-4-phosphate 5-kinase type 1 beta	GO:0046854 phosphatidylinositol phosphorylation;GO:0046834 lipid phosphorylation;GO:0006661 phosphatidylinositol biosynthetic process		ENZYME proteins:Transferases; Enzymes; Predicted intracellular proteins	Nucleoplasm (Approved); Additional: Vesicles		(M90)PID WNT CANONICAL PATHWAY; (M12)PID RHOA PATHWAY; (M278)PID RAC1 PATHWAY		0.0	0.0	1.0	0.0	0.0	0.0	0.0	0.0	0.0	0.0	0.0	0.0	0.0	0.0	0.0	0.0	0.0	0.0	1.0	0.0
ENSDARG00000087425						None	None	None	None	None	None	None	None	None	nan	nan	nan	nan	nan	nan	nan	nan	nan	nan	nan	nan	nan	nan	nan	nan	nan	nan	nan	nan
ENSDARG00000075188	564734	ensembl_gene_id	D. rerio	81794	H. sapiens	ADAMTS10	ADAM metallopeptidase with thrombospondin type 1 motif 10	GO:0030198 extracellular matrix organization;GO:0043062 extracellular structure organization;GO:0006508 proteolysis		Disease related genes; Predicted secreted proteins; Predicted intracellular proteins			(M3468)NABA ECM REGULATORS; (M5885)NABA MATRISOME ASSOCIATED; (M5889)NABA MATRISOME		0.0	0.0	0.0	0.0	0.0	0.0	0.0	0.0	0.0	0.0	0.0	0.0	0.0	0.0	0.0	0.0	0.0	0.0	0.0	0.0
ENSDARG00000058522	567601	ensembl_gene_id	D. rerio	55164	H. sapiens	SHQ1	SHQ1, H/ACA ribonucleoprotein assembly factor	GO:0000493 box H/ACA snoRNP assembly;GO:2000233 negative regulation of rRNA processing;GO:0090071 negative regulation of ribosome biogenesis		Predicted intracellular proteins	Nucleoplasm (Supported)				0.0	0.0	0.0	0.0	0.0	0.0	1.0	0.0	0.0	0.0	0.0	0.0	0.0	0.0	0.0	0.0	0.0	0.0	0.0	0.0
ENSDARG00000003054	559201	ensembl_gene_id	D. rerio	6870	H. sapiens	TACR3	tachykinin receptor 3	GO:0070474 positive regulation of uterine smooth muscle contraction;GO:0007217 tachykinin receptor signaling pathway;GO:0070471 uterine smooth muscle contraction		Disease related genes; G-protein coupled receptors:GPCRs excl olfactory receptors; Potential drug targets		Osanetant; Talnetant; Pavinetant		(M5941)HALLMARK UV RESPONSE UP; (M5932)HALLMARK INFLAMMATORY RESPONSE	0.0	0.0	0.0	1.0	0.0	0.0	0.0	0.0	0.0	0.0	0.0	0.0	0.0	0.0	0.0	1.0	0.0	0.0	0.0	0.0
ENSDARG00000004889	566517	ensembl_gene_id	D. rerio	175	H. sapiens	AGA	aspartylglucosaminidase	GO:0006517 protein deglycosylation;GO:0009100 glycoprotein metabolic process;GO:0043312 neutrophil degranulation		ENZYME proteins:Hydrolases; Disease related genes; Enzymes; Potential drug targets; Predicted intracellular proteins					0.0	0.0	0.0	0.0	0.0	0.0	0.0	0.0	0.0	0.0	0.0	0.0	0.0	0.0	0.0	0.0	0.0	0.0	0.0	0.0
ENSDARG00000101356						None	None	None	None	None	None	None	None	None	nan	nan	nan	nan	nan	nan	nan	nan	nan	nan	nan	nan	nan	nan	nan	nan	nan	nan	nan	nan
ENSDARG00000056258	30450	ensembl_gene_id	D. rerio	996	H. sapiens	CDC27	cell division cycle 27	GO:0045842 positive regulation of mitotic metaphase/anaphase transition;GO:1901970 positive regulation of mitotic sister chromatid separation;GO:1902101 positive regulation of metaphase/anaphase transition of cell cycle		Cancer-related genes:Mutated cancer genes; Predicted intracellular proteins	Nucleoplasm (Enhanced)			(M5893)HALLMARK MITOTIC SPINDLE; (M5901)HALLMARK G2M CHECKPOINT; (M5945)HALLMARK HEME METABOLISM	1.0	0.0	0.0	0.0	0.0	0.0	0.0	0.0	1.0	0.0	0.0	0.0	0.0	0.0	0.0	0.0	0.0	0.0	0.0	0.0
ENSDARG00000102566	796432	ensembl_gene_id	D. rerio			None	None	None	None	None	None	None	None	None	nan	nan	nan	nan	nan	nan	nan	nan	nan	nan	nan	nan	nan	nan	nan	nan	nan	nan	nan	nan
ENSDARG00000071076	436747	ensembl_gene_id	D. rerio	3945	H. sapiens	LDHB	lactate dehydrogenase B	GO:0006090 pyruvate metabolic process;GO:0005975 carbohydrate metabolic process;GO:0032787 monocarboxylic acid metabolic process		ENZYME proteins:Oxidoreductases; Disease related genes; Enzymes; FDA approved drug targets:Small molecule drugs; Predicted intracellular proteins	Cytosol (Supported)	NADH; 4-Hydroxy-1,2,5-oxadiazole-3-carboxylic acid; Oxamic Acid; Stiripentol; Artenimol		(M5936)HALLMARK OXIDATIVE PHOSPHORYLATION; (M5939)HALLMARK P53 PATHWAY	0.0	1.0	0.0	0.0	0.0	0.0	0.0	0.0	0.0	0.0	0.0	0.0	0.0	0.0	0.0	0.0	0.0	0.0	0.0	1.0
ENSDARG00000061352	678650	ensembl_gene_id	D. rerio	53335	H. sapiens	BCL11A	BAF chromatin remodeling complex subunit BCL11A	GO:1904799 regulation of neuron remodeling;GO:1904800 negative regulation of neuron remodeling;GO:2000173 negative regulation of branching morphogenesis of a nerve		Transcription factors:Zinc-coordinating DNA-binding domains; Disease related genes; Predicted intracellular proteins; Cancer-related genes:Candidate cancer biomarkers	Nucleoplasm (Supported); Additional: Nuclear bodies				0.0	0.0	0.0	0.0	1.0	1.0	0.0	0.0	0.0	0.0	0.0	0.0	1.0	0.0	0.0	0.0	0.0	0.0	0.0	0.0
ENSDARG00000104082	795613	ensembl_gene_id	D. rerio	7227	H. sapiens	TRPS1	transcriptional repressor GATA binding 1	GO:0032330 regulation of chondrocyte differentiation;GO:0061035 regulation of cartilage development;GO:0002062 chondrocyte differentiation		Transcription factors:Zinc-coordinating DNA-binding domains; Disease related genes; Predicted intracellular proteins	Nucleoplasm (Supported)				0.0	0.0	0.0	0.0	0.0	0.0	0.0	0.0	0.0	0.0	0.0	0.0	0.0	0.0	0.0	0.0	0.0	0.0	0.0	0.0
ENSDARG00000014058	780839	ensembl_gene_id	D. rerio	9609	H. sapiens	RAB36	RAB36, member RAS oncogene family	GO:0015031 protein transport;GO:0015833 peptide transport;GO:0042886 amide transport		Predicted intracellular proteins	Vesicles (Approved)				0.0	0.0	0.0	0.0	0.0	0.0	0.0	0.0	0.0	0.0	0.0	0.0	0.0	0.0	0.0	0.0	0.0	0.0	0.0	0.0
ENSDARG00000062148	571373	ensembl_gene_id	D. rerio	57337	H. sapiens	SENP7	SUMO specific peptidase 7	GO:0016926 protein desumoylation;GO:0070646 protein modification by small protein removal;GO:0018205 peptidyl-lysine modification		Peptidases:Cysteine-type peptidases; Enzymes; Predicted intracellular proteins	Nucleoplasm (Supported); Additional: Centrosome;Cytosol;Nuclear bodies				0.0	0.0	0.0	0.0	0.0	0.0	0.0	0.0	0.0	0.0	0.0	0.0	0.0	0.0	0.0	0.0	0.0	0.0	0.0	0.0
ENSDARG00000101019	497280	ensembl_gene_id	D. rerio	2131	H. sapiens	EXT1	exostosin glycosyltransferase 1	GO:0036339 lymphocyte adhesion to endothelial cell of high endothelial venule;GO:0060506 smoothened signaling pathway involved in lung development;GO:0061973 membrane bone morphogenesis		Disease related genes; ENZYME proteins:Transferases; Enzymes; Potential drug targets; Cancer-related genes:Candidate cancer biomarkers; Predicted intracellular proteins				(M5891)HALLMARK HYPOXIA; (M5937)HALLMARK GLYCOLYSIS	0.0	0.0	1.0	0.0	0.0	0.0	0.0	0.0	0.0	0.0	0.0	1.0	0.0	0.0	0.0	1.0	0.0	0.0	0.0	0.0
ENSDARG00000100958	103909734	ensembl_gene_id	D. rerio			None	None	None	None	None	None	None	None	None	nan	nan	nan	nan	nan	nan	nan	nan	nan	nan	nan	nan	nan	nan	nan	nan	nan	nan	nan	nan
ENSDARG00000059455	100002601	ensembl_gene_id	D. rerio	55760	H. sapiens	DHX32	DEAH-box helicase 32 (putative)			Enzymes; Predicted intracellular proteins; ENZYME proteins:Hydrolases					0.0	0.0	0.0	0.0	0.0	0.0	0.0	0.0	0.0	0.0	0.0	0.0	0.0	0.0	0.0	0.0	0.0	0.0	0.0	0.0
ENSDARG00000076974	100332580	ensembl_gene_id	D. rerio	79955	H. sapiens	PDZD7	PDZ domain containing 7	GO:0050910 detection of mechanical stimulus involved in sensory perception of sound;GO:0060088 auditory receptor cell stereocilium organization;GO:0002093 auditory receptor cell morphogenesis		Disease related genes; Predicted intracellular proteins	Nucleoplasm (Supported)				0.0	0.0	0.0	0.0	0.0	0.0	0.0	0.0	0.0	0.0	0.0	0.0	0.0	0.0	0.0	0.0	0.0	0.0	0.0	0.0
ENSDARG00000042933	791215	ensembl_gene_id	D. rerio	26258	H. sapiens	BLOC1S6	biogenesis of lysosomal organelles complex 1 subunit 6	GO:0050942 positive regulation of pigment cell differentiation;GO:0050932 regulation of pigment cell differentiation;GO:0048087 positive regulation of developmental pigmentation		Disease related genes; Predicted intracellular proteins					0.0	0.0	0.0	0.0	0.0	0.0	0.0	0.0	0.0	0.0	0.0	0.0	0.0	0.0	0.0	1.0	0.0	0.0	0.0	0.0
ENSDARG00000031387	259250	ensembl_gene_id	D. rerio	79603	H. sapiens	CERS4	ceramide synthase 4	GO:0046513 ceramide biosynthetic process;GO:0006672 ceramide metabolic process;GO:0030148 sphingolipid biosynthetic process		Predicted intracellular proteins	Nucleoplasm;Vesicles (Supported)				0.0	0.0	0.0	0.0	0.0	0.0	0.0	0.0	0.0	0.0	0.0	0.0	0.0	0.0	0.0	0.0	0.0	0.0	0.0	0.0
ENSDARG00000091138	406250	ensembl_gene_id	D. rerio	10096	H. sapiens	ACTR3	actin related protein 3	GO:0016344 meiotic chromosome movement towards spindle pole;GO:0051305 chromosome movement towards spindle pole;GO:0070358 actin polymerization-dependent cell motility		Predicted intracellular proteins		N-[2-(2-methyl-1H-indol-3-yl)ethyl]thiophene-2-carboxamide; (2S)-2-(3-bromophenyl)-3-(5-chloro-2-hydroxyphenyl)-1,3-thiazolidin-4-one	(M16801)SIG REGULATION OF THE ACTIN CYTOSKELETON BY RHO GTPASES; (M5193)SIG CHEMOTAXIS; (M278)PID RAC1 PATHWAY	(M5923)HALLMARK PI3K AKT MTOR SIGNALING; (M5924)HALLMARK MTORC1 SIGNALING	1.0	0.0	0.0	0.0	0.0	0.0	0.0	0.0	0.0	0.0	0.0	0.0	0.0	0.0	0.0	0.0	0.0	0.0	0.0	0.0
ENSDARG00000041300	777619	ensembl_gene_id	D. rerio	83450	H. sapiens	DRC3	dynein regulatory complex subunit 3			Predicted intracellular proteins					0.0	0.0	0.0	0.0	0.0	0.0	0.0	0.0	0.0	0.0	0.0	0.0	0.0	0.0	0.0	0.0	0.0	0.0	0.0	0.0
ENSDARG00000004581	568615	ensembl_gene_id	D. rerio	6400	H. sapiens	SEL1L	SEL1L adaptor subunit of ERAD E3 ubiquitin ligase	GO:1904380 endoplasmic reticulum mannose trimming;GO:0036507 protein demannosylation;GO:0036508 protein alpha-1,2-demannosylation		Predicted intracellular proteins					0.0	0.0	0.0	0.0	0.0	0.0	0.0	0.0	1.0	0.0	0.0	0.0	0.0	0.0	1.0	0.0	0.0	0.0	0.0	0.0
ENSDARG00000014717						None	None	None	None	None	None	None	None	None	nan	nan	nan	nan	nan	nan	nan	nan	nan	nan	nan	nan	nan	nan	nan	nan	nan	nan	nan	nan
ENSDARG00000008859	335888	ensembl_gene_id	D. rerio	29116	H. sapiens	MYLIP	myosin regulatory light chain interacting protein	GO:0032803 regulation of low-density lipoprotein particle receptor catabolic process;GO:2000644 regulation of receptor catabolic process;GO:0010989 negative regulation of low-density lipoprotein particle clearance		ENZYME proteins:Transferases; Enzymes; Predicted intracellular proteins					0.0	0.0	0.0	0.0	0.0	0.0	0.0	0.0	1.0	0.0	0.0	0.0	1.0	0.0	1.0	0.0	0.0	0.0	0.0	0.0
ENSDARG00000101143	566797	ensembl_gene_id	D. rerio	79720	H. sapiens	VPS37B	VPS37B subunit of ESCRT-I	GO:1903774 positive regulation of viral budding via host ESCRT complex;GO:1903772 regulation of viral budding via host ESCRT complex;GO:1902188 positive regulation of viral release from host cell		Predicted intracellular proteins				(M5898)HALLMARK DNA REPAIR	1.0	0.0	1.0	1.0	0.0	1.0	0.0	0.0	1.0	0.0	0.0	0.0	0.0	0.0	0.0	0.0	0.0	0.0	0.0	0.0
ENSDARG00000078942	566327	ensembl_gene_id	D. rerio	10495	H. sapiens	ENOX2	ecto-NOX disulfide-thiol exchanger 2	GO:0007624 ultradian rhythm;GO:0048511 rhythmic process;GO:0040008 regulation of growth		Predicted intracellular proteins	Cytosol (Approved); Additional: Plasma membrane	Idronoxil			0.0	0.0	0.0	0.0	0.0	0.0	0.0	0.0	0.0	0.0	0.0	0.0	0.0	0.0	0.0	0.0	0.0	0.0	0.0	0.0
ENSDARG00000099791	791206	ensembl_gene_id	D. rerio			None	None	None	None	None	None	None	None	None	nan	nan	nan	nan	nan	nan	nan	nan	nan	nan	nan	nan	nan	nan	nan	nan	nan	nan	nan	nan
ENSDARG00000004459	557454	ensembl_gene_id	D. rerio	9094	H. sapiens	UNC119	unc-119 lipid binding chaperone	GO:2001287 negative regulation of caveolin-mediated endocytosis;GO:1900186 negative regulation of clathrin-dependent endocytosis;GO:2001286 regulation of caveolin-mediated endocytosis		Disease related genes; Predicted intracellular proteins				(M5906)HALLMARK ESTROGEN RESPONSE EARLY	0.0	0.0	0.0	0.0	0.0	0.0	0.0	0.0	0.0	0.0	0.0	0.0	1.0	0.0	0.0	1.0	1.0	0.0	0.0	0.0
ENSDARG00000061746	559868	ensembl_gene_id	D. rerio	23229	H. sapiens	ARHGEF9	Cdc42 guanine nucleotide exchange factor 9	GO:0051056 regulation of small GTPase mediated signal transduction;GO:0007264 small GTPase mediated signal transduction;GO:0043065 positive regulation of apoptotic process		Disease related genes; Predicted intracellular proteins	Cytosol (Supported)		(M83)PID CDC42 REG PATHWAY	(M5942)HALLMARK UV RESPONSE DN	0.0	0.0	0.0	0.0	0.0	0.0	0.0	0.0	0.0	0.0	0.0	0.0	0.0	0.0	0.0	0.0	0.0	1.0	0.0	0.0
ENSDARG00000093786						None	None	None	None	None	None	None	None	None	nan	nan	nan	nan	nan	nan	nan	nan	nan	nan	nan	nan	nan	nan	nan	nan	nan	nan	nan	nan
ENSDARG00000062469	564413	ensembl_gene_id	D. rerio	10114	H. sapiens	HIPK3	homeodomain interacting protein kinase 3	GO:0009299 mRNA transcription;GO:0043508 negative regulation of JUN kinase activity;GO:0046329 negative regulation of JNK cascade	CMGC Ser/Thr protein kinase family	Predicted intracellular proteins; ENZYME proteins:Transferases; Enzymes; Kinases:CMGC Ser/Thr protein kinases	Cytosol (Supported); Additional: Nuclear bodies	Fostamatinib			0.0	0.0	0.0	0.0	0.0	0.0	0.0	0.0	0.0	0.0	0.0	0.0	0.0	0.0	0.0	0.0	1.0	0.0	0.0	0.0
ENSDARG00000092054						None	None	None	None	None	None	None	None	None	nan	nan	nan	nan	nan	nan	nan	nan	nan	nan	nan	nan	nan	nan	nan	nan	nan	nan	nan	nan
ENSDARG00000016788	100004929	ensembl_gene_id	D. rerio	6935	H. sapiens	ZEB1	zinc finger E-box binding homeobox 1	GO:0045602 negative regulation of endothelial cell differentiation;GO:0045601 regulation of endothelial cell differentiation;GO:0030857 negative regulation of epithelial cell differentiation		Predicted intracellular proteins; Disease related genes; Transcription factors:Helix-turn-helix domains	Nucleoplasm (Supported); Additional: Nucleoli		(M71)PID ILK PATHWAY	(M5921)HALLMARK COMPLEMENT	0.0	0.0	0.0	0.0	0.0	0.0	0.0	0.0	0.0	0.0	0.0	0.0	0.0	0.0	0.0	0.0	0.0	0.0	0.0	0.0
ENSDARG00000026759	393460	ensembl_gene_id	D. rerio			None	None	None	None	None	None	None	None	None	nan	nan	nan	nan	nan	nan	nan	nan	nan	nan	nan	nan	nan	nan	nan	nan	nan	nan	nan	nan
ENSDARG00000058044	394117	ensembl_gene_id	D. rerio	81876	H. sapiens	RAB1B	RAB1B, member RAS oncogene family	GO:0090557 establishment of endothelial intestinal barrier;GO:1903020 positive regulation of glycoprotein metabolic process;GO:2000785 regulation of autophagosome assembly		Predicted intracellular proteins	Golgi apparatus (Supported); Additional: Endoplasmic reticulum				0.0	0.0	0.0	0.0	0.0	1.0	0.0	0.0	0.0	0.0	0.0	0.0	0.0	0.0	0.0	0.0	0.0	0.0	0.0	0.0
ENSDARG00000103651	404626	ensembl_gene_id	D. rerio	7786	H. sapiens	MAP3K12	mitogen-activated protein kinase kinase kinase 12	GO:2000672 negative regulation of motor neuron apoptotic process;GO:2000671 regulation of motor neuron apoptotic process;GO:0097049 motor neuron apoptotic process	STE Ser/Thr protein kinase family	Predicted intracellular proteins; ENZYME proteins:Transferases; Enzymes; Kinases:STE Ser/Thr protein kinases	Nucleoplasm;Plasma membrane (Approved)	Fostamatinib	(M76)PID P38 ALPHA BETA PATHWAY; (M3721)ST JNK MAPK PATHWAY		0.0	0.0	0.0	0.0	0.0	0.0	0.0	0.0	0.0	0.0	0.0	0.0	0.0	0.0	0.0	0.0	1.0	0.0	0.0	0.0
ENSDARG00000101021	100000685	ensembl_gene_id	D. rerio	6583	H. sapiens	SLC22A4	solute carrier family 22 member 4	GO:1902603 carnitine transmembrane transport;GO:0015879 carnitine transport;GO:0015838 amino-acid betaine transport		Disease related genes	Mitochondria (Approved)	Levocarnitine		(M5945)HALLMARK HEME METABOLISM	0.0	0.0	1.0	0.0	0.0	0.0	0.0	0.0	0.0	0.0	0.0	0.0	0.0	0.0	0.0	0.0	0.0	0.0	1.0	0.0
ENSDARG00000101835						None	None	None	None	None	None	None	None	None	nan	nan	nan	nan	nan	nan	nan	nan	nan	nan	nan	nan	nan	nan	nan	nan	nan	nan	nan	nan
ENSDARG00000054152	561834	ensembl_gene_id	D. rerio	4829	H. sapiens	NMBR	neuromedin B receptor	GO:0031989 bombesin receptor signaling pathway;GO:0007200 phospholipase C-activating G protein-coupled receptor signaling pathway;GO:0007186 G protein-coupled receptor signaling pathway		G-protein coupled receptors:GPCRs excl olfactory receptors	Cytosol;Plasma membrane (Supported)				0.0	0.0	0.0	0.0	0.0	0.0	0.0	0.0	0.0	0.0	0.0	0.0	0.0	0.0	0.0	0.0	0.0	0.0	0.0	0.0
ENSDARG00000012446	552926	ensembl_gene_id	D. rerio	85441	H. sapiens	HELZ2	helicase with zinc finger 2	GO:0000184 nuclear-transcribed mRNA catabolic process, nonsense-mediated decay;GO:0090501 RNA phosphodiester bond hydrolysis;GO:0000956 nuclear-transcribed mRNA catabolic process		Predicted intracellular proteins				(M5911)HALLMARK INTERFERON ALPHA RESPONSE; (M5913)HALLMARK INTERFERON GAMMA RESPONSE	1.0	0.0	1.0	0.0	0.0	0.0	0.0	0.0	0.0	0.0	0.0	0.0	0.0	0.0	0.0	0.0	0.0	0.0	0.0	1.0
ENSDARG00000086269	793524	ensembl_gene_id	D. rerio	8509	H. sapiens	NDST2	N-deacetylase and N-sulfotransferase 2	GO:0015014 heparan sulfate proteoglycan biosynthetic process, polysaccharide chain biosynthetic process;GO:0030210 heparin biosynthetic process;GO:0030202 heparin metabolic process		ENZYME proteins:Transferases; Enzymes; Predicted intracellular proteins	Cytosol (Approved)			(M5891)HALLMARK HYPOXIA	0.0	0.0	1.0	0.0	0.0	0.0	0.0	0.0	0.0	0.0	0.0	0.0	0.0	0.0	0.0	0.0	0.0	0.0	0.0	0.0
ENSDARG00000058471	280649	ensembl_gene_id	D. rerio	5347	H. sapiens	PLK1	polo like kinase 1	GO:0070194 synaptonemal complex disassembly;GO:0016321 female meiosis chromosome segregation;GO:0090435 protein localization to nuclear envelope	Other	Kinases; Disease related genes; ENZYME proteins:Transferases; Enzymes; Cancer-related genes:Candidate cancer biomarkers; Potential drug targets; Predicted intracellular proteins		3-[3-chloro-5-(5-{[(1S)-1-phenylethyl]amino}isoxazolo[5,4-c]pyridin-3-yl)phenyl]propan-1-ol; 3-[3-(3-methyl-6-{[(1S)-1-phenylethyl]amino}-1H-pyrazolo[4,3-c]pyridin-1-yl)phenyl]propanamide; 4-(4-METHYLPIPERAZIN-1-YL)-N-[5-(2-THIENYLACETYL)-1,5-DIHYDROPYRROLO[3,4-C]PYRAZOL-3-YL]BENZAMIDE; 1-[5-Methyl-2-(trifluoromethyl)furan-3-yl]-3-[5-[2-[[6-(1H-1,2,4-triazol-5-ylamino)pyrimidin-4-yl]amino]ethyl]-…	(M46)PID ATR PATHWAY; (M176)PID FOXM1 PATHWAY; (M129)PID PLK1 PATHWAY	(M5928)HALLMARK MYC TARGETS V2; (M5893)HALLMARK MITOTIC SPINDLE; (M5901)HALLMARK G2M CHECKPOINT	0.0	0.0	1.0	0.0	0.0	0.0	0.0	0.0	1.0	1.0	0.0	0.0	1.0	1.0	1.0	0.0	1.0	0.0	0.0	0.0
ENSDARG00000046007	560064	ensembl_gene_id	D. rerio	9911	H. sapiens	TMCC2	transmembrane and coiled-coil domain family 2	GO:0042982 amyloid precursor protein metabolic process;GO:0019538 protein metabolic process;GO:1901564 organonitrogen compound metabolic process						(M5945)HALLMARK HEME METABOLISM	0.0	0.0	0.0	0.0	0.0	0.0	0.0	0.0	0.0	0.0	0.0	0.0	0.0	0.0	0.0	0.0	0.0	0.0	0.0	0.0
ENSDARG00000074642						None	None	None	None	None	None	None	None	None	nan	nan	nan	nan	nan	nan	nan	nan	nan	nan	nan	nan	nan	nan	nan	nan	nan	nan	nan	nan
ENSDARG00000038467	404631	ensembl_gene_id	D. rerio	93185	H. sapiens	IGSF8	immunoglobulin superfamily member 8	GO:0007519 skeletal muscle tissue development;GO:0060538 skeletal muscle organ development;GO:0007338 single fertilization		CD markers; Predicted intracellular proteins	Vesicles (Supported)		(M277)PID INTEGRIN A4B1 PATHWAY; (M18)PID INTEGRIN1 PATHWAY		0.0	0.0	0.0	0.0	0.0	0.0	0.0	0.0	0.0	0.0	0.0	0.0	0.0	0.0	0.0	0.0	0.0	0.0	0.0	0.0
ENSDARG00000104793	100150463	ensembl_gene_id	D. rerio	8526	H. sapiens	DGKE	diacylglycerol kinase epsilon	GO:0046339 diacylglycerol metabolic process;GO:0007205 protein kinase C-activating G protein-coupled receptor signaling pathway;GO:0006654 phosphatidic acid biosynthetic process		Disease related genes; ENZYME proteins:Transferases; Enzymes; Potential drug targets; Predicted intracellular proteins	Cytosol;Nucleoplasm (Approved)				0.0	0.0	1.0	0.0	0.0	0.0	0.0	0.0	0.0	0.0	0.0	0.0	0.0	0.0	0.0	1.0	0.0	0.0	1.0	0.0
ENSDARG00000088293	100006713	ensembl_gene_id	D. rerio	8447	H. sapiens	DOC2B	double C2 domain beta	GO:0031340 positive regulation of vesicle fusion;GO:0048791 calcium ion-regulated exocytosis of neurotransmitter;GO:0045956 positive regulation of calcium ion-dependent exocytosis		Predicted intracellular proteins					0.0	0.0	0.0	0.0	0.0	0.0	0.0	0.0	0.0	0.0	0.0	0.0	0.0	0.0	0.0	1.0	0.0	0.0	0.0	0.0
ENSDARG00000087377						None	None	None	None	None	None	None	None	None	nan	nan	nan	nan	nan	nan	nan	nan	nan	nan	nan	nan	nan	nan	nan	nan	nan	nan	nan	nan
ENSDARG00000037815	724080	ensembl_gene_id	D. rerio	9334	H. sapiens	B4GALT5	beta-1,4-galactosyltransferase 5	GO:0010706 ganglioside biosynthetic process via lactosylceramide;GO:0046478 lactosylceramide metabolic process;GO:0030311 poly-N-acetyllactosamine biosynthetic process		Predicted intracellular proteins				(M5890)HALLMARK TNFA SIGNALING VIA NFKB	0.0	0.0	1.0	0.0	0.0	0.0	0.0	0.0	0.0	0.0	0.0	0.0	0.0	0.0	1.0	0.0	0.0	0.0	0.0	0.0
ENSDARG00000103525	567114	ensembl_gene_id	D. rerio	64848	H. sapiens	YTHDC2	YTH domain containing 2	GO:0051728 cell cycle switching, mitotic to meiotic cell cycle;GO:0051729 germline cell cycle switching, mitotic to meiotic cell cycle;GO:0060184 cell cycle switching		Enzymes; Predicted intracellular proteins; ENZYME proteins:Hydrolases	Nucleoplasm (Approved); Additional: Cytoplasmic bodies;Nuclear bodies				0.0	0.0	0.0	0.0	0.0	0.0	0.0	0.0	0.0	0.0	0.0	0.0	0.0	0.0	0.0	0.0	0.0	0.0	0.0	0.0
ENSDARG00000063054	566152	ensembl_gene_id	D. rerio	85358	H. sapiens	SHANK3	SH3 and multiple ankyrin repeat domains 3	GO:0097117 guanylate kinase-associated protein clustering;GO:0097114 NMDA glutamate receptor clustering;GO:0051835 positive regulation of synapse structural plasticity		Predicted intracellular proteins	Nucleoplasm;Plasma membrane (Approved)		(M82)PID RET PATHWAY		1.0	0.0	0.0	0.0	0.0	0.0	0.0	0.0	0.0	0.0	0.0	0.0	1.0	0.0	0.0	1.0	0.0	0.0	0.0	0.0
ENSDARG00000051879	553281	ensembl_gene_id	D. rerio	6833	H. sapiens	ABCC8	ATP binding cassette subfamily C member 8	GO:0050796 regulation of insulin secretion;GO:0030073 insulin secretion;GO:0090276 regulation of peptide hormone secretion		Disease related genes; Transporters:Primary Active Transporters; FDA approved drug targets:Small molecule drugs	Nucleoli (Approved); Additional: Cytosol;Golgi apparatus	ATP; Glimepiride; Chlorpropamide; Nateglinide; Tolazamide; Repaglinide; Glyburide; Glipizide; Gliclazide; Tolbutamide; Gliquidone; Mitiglinide; Glymidine	(M106)PID HNF3B PATHWAY	(M5957)HALLMARK PANCREAS BETA CELLS; (M5949)HALLMARK PEROXISOME	0.0	0.0	1.0	0.0	0.0	0.0	0.0	0.0	0.0	0.0	0.0	0.0	0.0	0.0	0.0	0.0	0.0	1.0	0.0	0.0
ENSDARG00000004634	564372	ensembl_gene_id	D. rerio	5007	H. sapiens	OSBP	oxysterol binding protein	GO:0032366 intracellular sterol transport;GO:0032367 intracellular cholesterol transport;GO:0006699 bile acid biosynthetic process		Predicted intracellular proteins	Golgi apparatus (Supported); Additional: Cytosol;Nucleoplasm				0.0	0.0	0.0	0.0	0.0	0.0	0.0	0.0	0.0	0.0	0.0	0.0	0.0	0.0	0.0	0.0	0.0	0.0	0.0	1.0
ENSDARG00000077107	571743	ensembl_gene_id	D. rerio	220323	H. sapiens	OAF	out at first homolog			Predicted secreted proteins; Predicted intracellular proteins	Nucleoplasm (Approved)				0.0	0.0	0.0	0.0	0.0	0.0	0.0	0.0	0.0	0.0	0.0	0.0	0.0	0.0	0.0	0.0	0.0	0.0	0.0	0.0
ENSDARG00000041644	402976	ensembl_gene_id	D. rerio	57393	H. sapiens	CLTRN	collectrin, amino acid transport regulator	GO:0035543 positive regulation of SNARE complex assembly;GO:0070881 regulation of proline transport;GO:1902834 regulation of proline import across plasma membrane		Transporters:Electrochemical Potential-driven transporters	Endoplasmic reticulum;Vesicles (Approved)				0.0	0.0	0.0	0.0	0.0	0.0	0.0	0.0	0.0	0.0	0.0	0.0	0.0	0.0	0.0	0.0	0.0	0.0	0.0	0.0
ENSDARG00000018382	100144561	ensembl_gene_id	D. rerio	5583	H. sapiens	PRKCH	protein kinase C eta	GO:0034351 negative regulation of glial cell apoptotic process;GO:0050861 positive regulation of B cell receptor signaling pathway;GO:0034350 regulation of glial cell apoptotic process	AGC Ser/Thr protein kinase family	Kinases:AGC Ser/Thr protein kinases; Disease related genes; ENZYME proteins:Transferases; Enzymes; Cancer-related genes:Candidate cancer biomarkers; Potential drug targets; Predicted intracellular proteins	Cytosol (Approved); Additional: Plasma membrane		(M113)PID NFAT 3PATHWAY; (M99)PID TXA2PATHWAY; (M8)PID ENDOTHELIN PATHWAY	(M5947)HALLMARK IL2 STAT5 SIGNALING	1.0	0.0	0.0	0.0	0.0	0.0	0.0	0.0	0.0	0.0	0.0	0.0	0.0	0.0	0.0	0.0	0.0	0.0	0.0	0.0
ENSDARG00000027159	556288	ensembl_gene_id	D. rerio	23219	H. sapiens	FBXO28	F-box protein 28	GO:0000209 protein polyubiquitination;GO:0016567 protein ubiquitination;GO:0032446 protein modification by small protein conjugation		Predicted intracellular proteins	Nucleoplasm (Supported); Additional: Focal adhesion sites				0.0	0.0	0.0	0.0	0.0	0.0	0.0	0.0	0.0	0.0	0.0	0.0	0.0	0.0	0.0	0.0	0.0	0.0	0.0	0.0
ENSDARG00000015794						None	None	None	None	None	None	None	None	None	nan	nan	nan	nan	nan	nan	nan	nan	nan	nan	nan	nan	nan	nan	nan	nan	nan	nan	nan	nan
ENSDARG00000053624	568405	ensembl_gene_id	D. rerio	1436	H. sapiens	CSF1R	colony stimulating factor 1 receptor	GO:0038145 macrophage colony-stimulating factor signaling pathway;GO:0120041 positive regulation of macrophage proliferation;GO:0120040 regulation of macrophage proliferation	Tyr protein kinase family	CD markers; Disease related genes; ENZYME proteins:Transferases; Kinases:Tyr protein kinases; Enzymes; FDA approved drug targets:Small molecule drugs; RAS pathway related proteins; Cancer-related genes:Candidate cancer biomarkers; Predicted intracellular proteins	Plasma membrane;Vesicles (Supported)	Imatinib; Sunitinib; ABT-869; 5-CYANO-FURAN-2-CARBOXYLIC ACID [5-HYDROXYMETHYL-2-(4-METHYL-PIPERIDIN-1-YL)-PHENYL]-AMIDE; 6-CHLORO-3-(3-METHYLISOXAZOL-5-YL)-4-PHENYLQUINOLIN-2(1H)-ONE; Fostamatinib; Erdafitinib; Pexidartinib	(M91)PID TCPTP PATHWAY; (M50)PID PTP1B PATHWAY; (M160)PID AVB3 INTEGRIN PATHWAY		0.0	0.0	0.0	1.0	0.0	0.0	0.0	0.0	0.0	0.0	0.0	0.0	0.0	0.0	0.0	0.0	1.0	0.0	0.0	0.0
ENSDARG00000026766	373113	ensembl_gene_id	D. rerio	596	H. sapiens	BCL2	BCL2 apoptosis regulator	GO:0032848 negative regulation of cellular pH reduction;GO:0046671 negative regulation of retinal cell programmed cell death;GO:0021747 cochlear nucleus development		Predicted intracellular proteins; Disease related genes; FDA approved drug targets:Small molecule drugs; Cancer-related genes:Candidate cancer biomarkers	Nuclear membrane (Supported); Additional: Nucleoplasm	Ibuprofen; Paclitaxel; Docetaxel; Rasagiline; Paclitaxel docosahexaenoic acid; Apoptone; Glycine betaine; Eribulin; Dexibuprofen; Isosorbide; Venetoclax; Obatoclax; Navitoclax	(M5060)SA FAS SIGNALING; (M13096)SA PROGRAMMED CELL DEATH; (M162)PID RXR VDR PATHWAY	(M5947)HALLMARK IL2 STAT5 SIGNALING; (M5891)HALLMARK HYPOXIA; (M5906)HALLMARK ESTROGEN RESPONSE EARLY	1.0	1.0	1.0	1.0	1.0	1.0	0.0	0.0	0.0	0.0	0.0	1.0	0.0	0.0	1.0	1.0	1.0	0.0	0.0	0.0
ENSDARG00000079363	564554	ensembl_gene_id	D. rerio	121227	H. sapiens	LRIG3	leucine rich repeats and immunoglobulin like domains 3	GO:0032474 otolith morphogenesis;GO:0048840 otolith development;GO:0042472 inner ear morphogenesis		Cancer-related genes; Predicted intracellular proteins	Cytosol (Approved)				0.0	0.0	0.0	0.0	0.0	0.0	0.0	0.0	0.0	0.0	0.0	0.0	0.0	0.0	0.0	0.0	0.0	0.0	0.0	0.0
ENSDARG00000088354						None	None	None	None	None	None	None	None	None	nan	nan	nan	nan	nan	nan	nan	nan	nan	nan	nan	nan	nan	nan	nan	nan	nan	nan	nan	nan
ENSDARG00000101859	559570	ensembl_gene_id	D. rerio			None	None	None	None	None	None	None	None	None	nan	nan	nan	nan	nan	nan	nan	nan	nan	nan	nan	nan	nan	nan	nan	nan	nan	nan	nan	nan
ENSDARG00000063672	566221	ensembl_gene_id	D. rerio	7289	H. sapiens	TULP3	TUB like protein 3	GO:0060434 bronchus morphogenesis;GO:0021914 negative regulation of smoothened signaling pathway involved in ventral spinal cord patterning;GO:1901621 negative regulation of smoothened signaling pathway involved in dorsal/ventral neural tube patterning		Predicted secreted proteins; Predicted intracellular proteins	Nucleoli;Nucleoplasm (Supported); Additional: Plasma membrane				0.0	0.0	0.0	0.0	0.0	0.0	0.0	0.0	0.0	0.0	0.0	0.0	0.0	0.0	0.0	0.0	0.0	0.0	0.0	0.0
ENSDARG00000068702	100149102	ensembl_gene_id	D. rerio	145748	H. sapiens	LYSMD4	LysM domain containing 4			Predicted intracellular proteins	Cytosol (Approved); Additional: Actin filaments				0.0	0.0	0.0	0.0	0.0	0.0	0.0	0.0	0.0	0.0	0.0	0.0	0.0	0.0	0.0	0.0	0.0	0.0	0.0	0.0
ENSDARG00000027423	245701	ensembl_gene_id	D. rerio	3480	H. sapiens	IGF1R	insulin like growth factor 1 receptor	GO:0051389 inactivation of MAPKK activity;GO:0045056 transcytosis;GO:0097062 dendritic spine maintenance	Tyr protein kinase family	CD markers; Disease related genes; ENZYME proteins:Transferases; Kinases:Tyr protein kinases; Enzymes; RAS pathway related proteins; Cancer-related genes:Candidate cancer biomarkers; FDA approved drug targets:Biotech drugs; Predicted intracellular proteins		Insulin human; Insulin lispro; Insulin glargine; Insulin pork; Mecasermin; Insulin aspart; Insulin detemir; Insulin glulisine; Phosphoaminophosphonic Acid-Adenylate Ester; ATL1101; XL228; rhIGFBP-3; Linsitinib; Teprotumumab; (4Z)-6-bromo-4-({[4-(pyrrolidin-1-ylmethyl)phenyl]amino}methylidene)isoquinoline-1,3(2H,4H)-dione; 3-[5-(1H-IMIDAZOL-1-YL)-7-METHYL-1H-BENZIMIDAZOL-2-YL]-4-[(PYRIDIN-2-YLMETH…	(M125)PID IGF1 PATHWAY; (M41)PID ER NONGENOMIC PATHWAY; (M232)PID ECADHERIN STABILIZATION PATHWAY	(M5942)HALLMARK UV RESPONSE DN; (M5947)HALLMARK IL2 STAT5 SIGNALING; (M5906)HALLMARK ESTROGEN RESPONSE EARLY	0.0	0.0	0.0	1.0	0.0	0.0	0.0	0.0	0.0	0.0	0.0	0.0	0.0	1.0	0.0	0.0	1.0	0.0	0.0	0.0
ENSDARG00000086848	403004	ensembl_gene_id	D. rerio	55210	H. sapiens	ATAD3A	ATPase family AAA domain containing 3A	GO:0001558 regulation of cell growth;GO:0016049 cell growth;GO:0007005 mitochondrion organization		Disease related genes; Predicted intracellular proteins	Mitochondria (Enhanced)				0.0	1.0	0.0	0.0	0.0	0.0	0.0	0.0	0.0	0.0	0.0	0.0	0.0	0.0	0.0	0.0	0.0	0.0	0.0	0.0
ENSDARG00000075823						None	None	None	None	None	None	None	None	None	nan	nan	nan	nan	nan	nan	nan	nan	nan	nan	nan	nan	nan	nan	nan	nan	nan	nan	nan	nan
ENSDARG00000055989	406680	ensembl_gene_id	D. rerio	153396	H. sapiens	TMEM161B	transmembrane protein 161B								0.0	0.0	0.0	0.0	0.0	0.0	0.0	0.0	0.0	0.0	0.0	0.0	0.0	0.0	0.0	0.0	0.0	0.0	0.0	0.0
ENSDARG00000094460						None	None	None	None	None	None	None	None	None	nan	nan	nan	nan	nan	nan	nan	nan	nan	nan	nan	nan	nan	nan	nan	nan	nan	nan	nan	nan
ENSDARG00000013390						None	None	None	None	None	None	None	None	None	nan	nan	nan	nan	nan	nan	nan	nan	nan	nan	nan	nan	nan	nan	nan	nan	nan	nan	nan	nan
ENSDARG00000013847	378478	ensembl_gene_id	D. rerio	1956	H. sapiens	EGFR	epidermal growth factor receptor	GO:0043006 activation of phospholipase A2 activity by calcium-mediated signaling;GO:1902722 positive regulation of prolactin secretion;GO:0032431 activation of phospholipase A2 activity	Tyr protein kinase family	Cancer-related genes:Mutational cancer driver genes; Disease related genes; ENZYME proteins:Transferases; Cancer-related genes:Mutated cancer genes; Enzymes; FDA approved drug targets:Small molecule drugs; Kinases:Tyr protein kinases; RAS pathway related proteins; Cancer-related genes:Candidate cancer biomarkers; FDA approved drug targets:Biotech drugs; Predicted secreted proteins; Predicted intr…	Cell Junctions;Plasma membrane (Enhanced)	Cetuximab; Lidocaine; Gefitinib; Erlotinib; Lapatinib; Panitumumab; Alvocidib; IGN311; Matuzumab; Vandetanib; Rindopepimut; Canertinib; Pelitinib; Varlitinib; AV-412; S-{3-[(4-ANILINOQUINAZOLIN-6-YL)AMINO]-3-OXOPROPYL}-L-CYSTEINE; PD-168393; Afatinib; Osimertinib; Necitumumab; Foreskin keratinocyte (neonatal); Depatuxizumab mafodotin; Icotinib; Neratinib; Dacomitinib; Fostamatinib; Zalutumumab; B…	(M201)PID ERBB NETWORK PATHWAY; (M251)PID SYNDECAN 3 PATHWAY; (M184)PID ECADHERIN KERATINOCYTE PATHWAY	(M5910)HALLMARK PROTEIN SECRETION; (M5923)HALLMARK PI3K AKT MTOR SIGNALING; (M5891)HALLMARK HYPOXIA	1.0	0.0	0.0	1.0	1.0	1.0	0.0	0.0	1.0	0.0	0.0	1.0	0.0	0.0	0.0	1.0	1.0	0.0	1.0	0.0
ENSDARG00000073784	100334565	ensembl_gene_id	D. rerio	9637	H. sapiens	FEZ2	fasciculation and elongation protein zeta 2	GO:1902902 negative regulation of autophagosome assembly;GO:0016242 negative regulation of macroautophagy;GO:2000785 regulation of autophagosome assembly		Predicted intracellular proteins	Nucleoli;Nucleoli rim (Approved); Additional: Cytosol;Golgi apparatus				0.0	0.0	0.0	0.0	0.0	1.0	0.0	0.0	0.0	0.0	0.0	0.0	1.0	0.0	0.0	0.0	0.0	0.0	0.0	0.0
ENSDARG00000060303	557642	ensembl_gene_id	D. rerio	57282	H. sapiens	SLC4A10	solute carrier family 4 member 10	GO:0021860 pyramidal neuron development;GO:0021859 pyramidal neuron differentiation;GO:0035641 locomotory exploration behavior		Transporters:Electrochemical Potential-driven transporters					0.0	0.0	1.0	0.0	0.0	0.0	0.0	0.0	0.0	0.0	0.0	1.0	0.0	0.0	0.0	1.0	0.0	0.0	0.0	0.0
ENSDARG00000060766	565130	ensembl_gene_id	D. rerio	5829	H. sapiens	PXN	paxillin	GO:0007172 signal complex assembly;GO:0060396 growth hormone receptor signaling pathway;GO:0071378 cellular response to growth hormone stimulus		Predicted intracellular proteins	Focal adhesion sites (Enhanced); Additional: Centrosome;Cytosol		(M118)PID INTEGRIN A9B1 PATHWAY; (M125)PID IGF1 PATHWAY; (M277)PID INTEGRIN A4B1 PATHWAY	(M5893)HALLMARK MITOTIC SPINDLE	0.0	0.0	0.0	1.0	1.0	0.0	0.0	0.0	0.0	0.0	0.0	0.0	0.0	0.0	0.0	0.0	0.0	0.0	1.0	0.0
ENSDARG00000074126	100320357	ensembl_gene_id	D. rerio	22996	H. sapiens	TTC39A	tetratricopeptide repeat domain 39A	GO:0008150 biological_process		Predicted intracellular proteins	Centrosome (Enhanced)			(M5906)HALLMARK ESTROGEN RESPONSE EARLY	0.0	0.0	0.0	0.0	0.0	0.0	0.0	0.0	0.0	0.0	0.0	0.0	0.0	0.0	0.0	0.0	0.0	0.0	0.0	0.0
ENSDARG00000021225	117507	ensembl_gene_id	D. rerio	5584	H. sapiens	PRKCI	protein kinase C iota	GO:0034351 negative regulation of glial cell apoptotic process;GO:0034350 regulation of glial cell apoptotic process;GO:0034349 glial cell apoptotic process	AGC Ser/Thr protein kinase family	Kinases:AGC Ser/Thr protein kinases; ENZYME proteins:Transferases; Enzymes; Cancer-related genes:Candidate cancer biomarkers; Predicted intracellular proteins	Cytosol (Supported); Additional: Cytokinetic bridge;Microtubules	Bisindolylmaleimide I; Fostamatinib	(M247)PID INSULIN GLUCOSE PATHWAY; (M193)PID NEPHRIN NEPH1 PATHWAY; (M110)PID IL1 PATHWAY		1.0	0.0	0.0	1.0	0.0	0.0	0.0	0.0	0.0	0.0	0.0	0.0	0.0	0.0	0.0	0.0	0.0	0.0	0.0	0.0
ENSDARG00000101722	327175	ensembl_gene_id	D. rerio	23367	H. sapiens	LARP1	La ribonucleoprotein 1, translational regulator	GO:0072752 cellular response to rapamycin;GO:1901355 response to rapamycin;GO:0071362 cellular response to ether		Predicted intracellular proteins	Cytosol;Endoplasmic reticulum;Nucleoplasm (Supported)				1.0	0.0	0.0	0.0	1.0	1.0	0.0	0.0	1.0	0.0	0.0	0.0	0.0	0.0	0.0	0.0	0.0	0.0	0.0	0.0
ENSDARG00000068417	100149117	ensembl_gene_id	D. rerio	668	H. sapiens	FOXL2	forkhead box L2	GO:0002074 extraocular skeletal muscle development;GO:0006309 apoptotic DNA fragmentation;GO:0000737 DNA catabolic process, endonucleolytic		Cancer-related genes; Disease related genes; Predicted intracellular proteins; Transcription factors:Helix-turn-helix domains	Nucleoplasm (Supported); Additional: Midbody ring				1.0	0.0	0.0	0.0	0.0	0.0	0.0	0.0	0.0	0.0	0.0	0.0	0.0	1.0	0.0	0.0	0.0	0.0	0.0	0.0
ENSDARG00000039661	504109	ensembl_gene_id	D. rerio	120103	H. sapiens	SLC36A4	solute carrier family 36 member 4	GO:1904556 L-tryptophan transmembrane transport;GO:1904271 L-proline import across plasma membrane;GO:1904555 L-proline transmembrane transport		Transporters:Electrochemical Potential-driven transporters	Cytosol;Golgi apparatus;Plasma membrane (Approved)				1.0	0.0	0.0	0.0	0.0	0.0	0.0	0.0	0.0	0.0	0.0	0.0	0.0	0.0	0.0	0.0	0.0	0.0	0.0	0.0
ENSDARG00000081270	100272168	ensembl_gene_id	D. rerio			None	None	None	None	None	None	None	None	None	nan	nan	nan	nan	nan	nan	nan	nan	nan	nan	nan	nan	nan	nan	nan	nan	nan	nan	nan	nan
ENSDARG00000069560	100006614	ensembl_gene_id	D. rerio	23416	H. sapiens	KCNH3	potassium voltage-gated channel subfamily H member 3	GO:0071804 cellular potassium ion transport;GO:0071805 potassium ion transmembrane transport;GO:0006813 potassium ion transport		Transporters:Transporter channels and pores; Voltage-gated ion channels:Voltage-Gated Potassium Channels	Mitochondria;Nucleoplasm (Approved)				0.0	0.0	1.0	0.0	0.0	0.0	0.0	0.0	0.0	0.0	0.0	0.0	0.0	0.0	0.0	1.0	0.0	1.0	0.0	0.0
ENSDARG00000056630	566212	ensembl_gene_id	D. rerio	253935	H. sapiens	ANGPTL5	angiopoietin like 5			Predicted secreted proteins			(M5883)NABA SECRETED FACTORS; (M5885)NABA MATRISOME ASSOCIATED; (M5889)NABA MATRISOME		0.0	0.0	0.0	0.0	0.0	0.0	0.0	0.0	0.0	0.0	0.0	0.0	0.0	0.0	0.0	0.0	0.0	0.0	0.0	0.0
ENSDARG00000037415	571372	ensembl_gene_id	D. rerio	9229	H. sapiens	DLGAP1	DLG associated protein 1	GO:0098962 regulation of postsynaptic neurotransmitter receptor activity;GO:0099601 regulation of neurotransmitter receptor activity;GO:0031644 regulation of neurological system process		Predicted intracellular proteins					0.0	0.0	0.0	0.0	0.0	0.0	0.0	0.0	0.0	0.0	0.0	0.0	0.0	0.0	0.0	1.0	0.0	1.0	0.0	0.0
ENSDARG00000061023	562545	ensembl_gene_id	D. rerio	54785	H. sapiens	BORCS6	BLOC-1 related complex subunit 6	GO:0032418 lysosome localization;GO:0051640 organelle localization;GO:0051641 cellular localization		Predicted intracellular proteins	Golgi apparatus;Vesicles (Approved)				0.0	0.0	0.0	0.0	0.0	0.0	0.0	0.0	0.0	0.0	0.0	0.0	0.0	0.0	0.0	0.0	0.0	0.0	0.0	0.0
ENSDARG00000061862	559005	ensembl_gene_id	D. rerio	399687	H. sapiens	MYO18A	myosin XVIIIA	GO:1903028 positive regulation of opsonization;GO:0090164 asymmetric Golgi ribbon formation;GO:1903027 regulation of opsonization		Predicted intracellular proteins					0.0	0.0	0.0	0.0	0.0	0.0	0.0	0.0	0.0	0.0	0.0	0.0	0.0	0.0	0.0	0.0	0.0	0.0	0.0	0.0
ENSDARG00000003311	570866	ensembl_gene_id	D. rerio	80025	H. sapiens	PANK2	pantothenate kinase 2	GO:0015939 pantothenate metabolic process;GO:0015937 coenzyme A biosynthetic process;GO:0015936 coenzyme A metabolic process		Disease related genes; ENZYME proteins:Transferases; Enzymes; Potential drug targets; Predicted intracellular proteins	Cytosol (Supported)				0.0	1.0	1.0	0.0	0.0	0.0	0.0	0.0	0.0	0.0	1.0	0.0	0.0	0.0	0.0	1.0	0.0	0.0	0.0	1.0
ENSDARG00000025797	393888	ensembl_gene_id	D. rerio	11057	H. sapiens	ABHD2	abhydrolase domain containing 2, acylglycerol lipase	GO:0051793 medium-chain fatty acid catabolic process;GO:0051792 medium-chain fatty acid biosynthetic process;GO:0051791 medium-chain fatty acid metabolic process		Enzymes; ENZYME proteins:Hydrolases	Cytosol (Approved); Additional: Nucleoplasm			(M5908)HALLMARK ANDROGEN RESPONSE; (M5906)HALLMARK ESTROGEN RESPONSE EARLY; (M5907)HALLMARK ESTROGEN RESPONSE LATE	0.0	0.0	0.0	0.0	0.0	0.0	0.0	0.0	0.0	0.0	0.0	0.0	0.0	0.0	0.0	0.0	0.0	0.0	0.0	1.0
ENSDARG00000099256	394176	ensembl_gene_id	D. rerio	9698	H. sapiens	PUM1	pumilio RNA binding family member 1	GO:1900246 positive regulation of RIG-I signaling pathway;GO:0039535 regulation of RIG-I signaling pathway;GO:0039531 regulation of viral-induced cytoplasmic pattern recognition receptor signaling pathway		Predicted intracellular proteins	Cytosol (Enhanced); Additional: Nucleoplasm				1.0	0.0	0.0	0.0	0.0	0.0	0.0	0.0	1.0	0.0	0.0	0.0	0.0	0.0	0.0	1.0	0.0	0.0	0.0	0.0
ENSDARG00000083389						None	None	None	None	None	None	None	None	None	nan	nan	nan	nan	nan	nan	nan	nan	nan	nan	nan	nan	nan	nan	nan	nan	nan	nan	nan	nan
ENSDARG00000032859	767732	ensembl_gene_id	D. rerio	157638	H. sapiens	LRATD2	LRAT domain containing 2			Predicted intracellular proteins	Nucleoplasm (Approved)				0.0	0.0	0.0	0.0	0.0	0.0	0.0	0.0	0.0	0.0	0.0	0.0	0.0	0.0	0.0	0.0	0.0	0.0	0.0	0.0
ENSDARG00000001817	798602	ensembl_gene_id	D. rerio	10927	H. sapiens	SPIN1	spindlin 1	GO:0009303 rRNA transcription;GO:0098781 ncRNA transcription;GO:0030177 positive regulation of Wnt signaling pathway		Predicted intracellular proteins	Nucleoplasm (Supported)				0.0	0.0	0.0	0.0	0.0	0.0	1.0	0.0	0.0	0.0	0.0	0.0	0.0	0.0	0.0	0.0	0.0	0.0	0.0	0.0
ENSDARG00000062978	555601	ensembl_gene_id	D. rerio	115948	H. sapiens	ODAD3	outer dynein arm docking complex subunit 3	GO:0036158 outer dynein arm assembly;GO:0070286 axonemal dynein complex assembly;GO:0035082 axoneme assembly		Disease related genes; Predicted intracellular proteins	Nucleoplasm (Approved)				0.0	0.0	0.0	0.0	0.0	0.0	0.0	0.0	0.0	0.0	0.0	0.0	0.0	0.0	0.0	0.0	0.0	0.0	0.0	0.0
ENSDARG00000086034						None	None	None	None	None	None	None	None	None	nan	nan	nan	nan	nan	nan	nan	nan	nan	nan	nan	nan	nan	nan	nan	nan	nan	nan	nan	nan
ENSDARG00000044246	548603	ensembl_gene_id	D. rerio	112574	H. sapiens	SNX18	sorting nexin 18	GO:0036089 cleavage furrow formation;GO:0032506 cytokinetic process;GO:0000281 mitotic cytokinesis		Predicted intracellular proteins	Cytosol (Approved)				0.0	0.0	0.0	0.0	0.0	0.0	0.0	0.0	0.0	0.0	0.0	0.0	0.0	0.0	0.0	0.0	0.0	0.0	0.0	0.0
ENSDARG00000014792	100535350	ensembl_gene_id	D. rerio	94030	H. sapiens	LRRC4B	leucine rich repeat containing 4B	GO:0099151 regulation of postsynaptic density assembly;GO:0099150 regulation of postsynaptic specialization assembly;GO:0150052 regulation of postsynapse assembly		Predicted intracellular proteins					0.0	0.0	0.0	0.0	0.0	0.0	0.0	0.0	0.0	0.0	0.0	0.0	0.0	0.0	0.0	0.0	0.0	1.0	0.0	0.0
ENSDARG00000067829	553418	ensembl_gene_id	D. rerio	10891	H. sapiens	PPARGC1A	PPARG coactivator 1 alpha	GO:0071250 cellular response to nitrite;GO:0080033 response to nitrite;GO:2000184 positive regulation of progesterone biosynthetic process		Predicted intracellular proteins; Cancer-related genes:Candidate cancer biomarkers	Nucleoplasm (Supported)		(M32)PID HDAC CLASSIII PATHWAY; (M229)PID P38 ALPHA BETA DOWNSTREAM PATHWAY; (M166)PID ATF2 PATHWAY	(M5891)HALLMARK HYPOXIA	1.0	1.0	1.0	0.0	1.0	1.0	0.0	0.0	0.0	0.0	0.0	0.0	1.0	1.0	1.0	1.0	0.0	0.0	0.0	1.0
ENSDARG00000086535						None	None	None	None	None	None	None	None	None	nan	nan	nan	nan	nan	nan	nan	nan	nan	nan	nan	nan	nan	nan	nan	nan	nan	nan	nan	nan
ENSDARG00000088689	100535360	ensembl_gene_id	D. rerio	114548	H. sapiens	NLRP3	NLR family pyrin domain containing 3	GO:0045630 positive regulation of T-helper 2 cell differentiation;GO:2000553 positive regulation of T-helper 2 cell cytokine production;GO:0045628 regulation of T-helper 2 cell differentiation		Cancer-related genes:Mutational cancer driver genes; Disease related genes; Predicted intracellular proteins				(M5932)HALLMARK INFLAMMATORY RESPONSE; (M5950)HALLMARK ALLOGRAFT REJECTION	0.0	0.0	0.0	0.0	1.0	0.0	0.0	0.0	0.0	0.0	0.0	0.0	0.0	0.0	0.0	0.0	0.0	0.0	1.0	0.0
ENSDARG00000060532	100126805	ensembl_gene_id	D. rerio	53616	H. sapiens	ADAM22	ADAM metallopeptidase domain 22	GO:0099633 protein localization to postsynaptic specialization membrane;GO:0099645 neurotransmitter receptor localization to postsynaptic specialization membrane;GO:0022011 myelination in peripheral nervous system		Predicted intracellular proteins	Cell Junctions (Approved)		(M3468)NABA ECM REGULATORS; (M5885)NABA MATRISOME ASSOCIATED; (M5889)NABA MATRISOME		1.0	0.0	0.0	0.0	0.0	0.0	0.0	0.0	0.0	0.0	0.0	0.0	0.0	0.0	0.0	1.0	0.0	0.0	0.0	0.0
ENSDARG00000103934						None	None	None	None	None	None	None	None	None	nan	nan	nan	nan	nan	nan	nan	nan	nan	nan	nan	nan	nan	nan	nan	nan	nan	nan	nan	nan
ENSDARG00000078001	794299	ensembl_gene_id	D. rerio	84078	H. sapiens	KBTBD7	kelch repeat and BTB domain containing 7	GO:0043687 post-translational protein modification;GO:0000165 MAPK cascade;GO:0023014 signal transduction by protein phosphorylation		Predicted intracellular proteins					0.0	0.0	0.0	0.0	0.0	0.0	0.0	0.0	0.0	0.0	0.0	0.0	0.0	0.0	0.0	0.0	0.0	0.0	0.0	0.0
ENSDARG00000100222	100034367	ensembl_gene_id	D. rerio	7402	H. sapiens	UTRN	utrophin	GO:0014877 response to muscle inactivity involved in regulation of muscle adaptation;GO:0014894 response to denervation involved in regulation of muscle adaptation;GO:0014870 response to muscle inactivity		Predicted intracellular proteins	Nucleoplasm;Plasma membrane (Approved)	Zinc; Zinc acetate; Zinc chloride; Zinc sulfate, unspecified form			1.0	0.0	1.0	0.0	0.0	0.0	0.0	0.0	0.0	0.0	0.0	0.0	0.0	0.0	0.0	1.0	0.0	0.0	0.0	0.0
ENSDARG00000078694	100331906	ensembl_gene_id	D. rerio	23239	H. sapiens	PHLPP1	PH domain and leucine rich repeat protein phosphatase 1	GO:0002249 lymphocyte anergy;GO:0002667 regulation of T cell anergy;GO:0002870 T cell anergy		Enzymes; Predicted intracellular proteins; ENZYME proteins:Hydrolases					0.0	0.0	0.0	0.0	0.0	0.0	0.0	0.0	0.0	0.0	0.0	0.0	0.0	0.0	0.0	0.0	1.0	0.0	1.0	0.0
ENSDARG00000060469	564088	ensembl_gene_id	D. rerio	30849	H. sapiens	PIK3R4	phosphoinositide-3-kinase regulatory subunit 4	GO:0030242 autophagy of peroxisome;GO:0045324 late endosome to vacuole transport;GO:0034162 toll-like receptor 9 signaling pathway	Other	Kinases; ENZYME proteins:Transferases; Enzymes; Predicted intracellular proteins	Vesicles (Approved); Additional: Microtubules				1.0	0.0	1.0	0.0	0.0	1.0	0.0	0.0	0.0	0.0	0.0	0.0	0.0	0.0	0.0	0.0	1.0	0.0	1.0	1.0
ENSDARG00000096264	100332319	ensembl_gene_id	D. rerio			None	None	None	None	None	None	None	None	None	nan	nan	nan	nan	nan	nan	nan	nan	nan	nan	nan	nan	nan	nan	nan	nan	nan	nan	nan	nan
ENSDARG00000105214	554164	ensembl_gene_id	D. rerio	23287	H. sapiens	AGTPBP1	ATP/GTP binding protein 1	GO:0035609 C-terminal protein deglutamylation;GO:0035610 protein side chain deglutamylation;GO:0035608 protein deglutamylation		Enzymes; Peptidases:Metallopeptidases; Predicted intracellular proteins	Nucleoli;Vesicles (Approved)				0.0	1.0	0.0	0.0	0.0	0.0	0.0	0.0	0.0	0.0	0.0	0.0	0.0	0.0	0.0	0.0	0.0	0.0	0.0	0.0
ENSDARG00000032565	393614	ensembl_gene_id	D. rerio	10369	H. sapiens	CACNG2	calcium voltage-gated channel auxiliary subunit gamma 2	GO:0060082 eye blink reflex;GO:1904508 regulation of protein localization to basolateral plasma membrane;GO:1904510 positive regulation of protein localization to basolateral plasma membrane		Disease related genes; Transporters:Accessory Factors Involved in Transport; Potential drug targets		Ethanol			1.0	0.0	1.0	0.0	1.0	0.0	0.0	0.0	0.0	0.0	1.0	0.0	0.0	0.0	0.0	1.0	0.0	1.0	0.0	0.0
ENSDARG00000075747	794689	ensembl_gene_id	D. rerio	9765	H. sapiens	ZFYVE16	zinc finger FYVE-type containing 16	GO:0006622 protein targeting to lysosome;GO:0006623 protein targeting to vacuole;GO:0061462 protein localization to lysosome		Predicted intracellular proteins	Cytosol;Vesicles (Enhanced)		(M181)PID BMP PATHWAY; (M286)PID TGFBR PATHWAY		1.0	0.0	0.0	0.0	0.0	0.0	0.0	0.0	0.0	0.0	0.0	0.0	0.0	0.0	0.0	0.0	0.0	0.0	0.0	0.0
ENSDARG00000015803	407723	ensembl_gene_id	D. rerio	140775	H. sapiens	SMCR8	SMCR8-C9orf72 complex subunit	GO:1901098 positive regulation of autophagosome maturation;GO:1901096 regulation of autophagosome maturation;GO:1902902 negative regulation of autophagosome assembly		Predicted intracellular proteins	Nucleoplasm (Enhanced)				0.0	0.0	0.0	0.0	0.0	1.0	0.0	0.0	1.0	0.0	0.0	0.0	1.0	1.0	0.0	0.0	0.0	0.0	0.0	0.0
ENSDARG00000060115	568527	ensembl_gene_id	D. rerio	57633	H. sapiens	LRRN1	leucine rich repeat neuronal 1	GO:0051965 positive regulation of synapse assembly;GO:0051963 regulation of synapse assembly;GO:0007416 synapse assembly							0.0	0.0	0.0	0.0	0.0	0.0	0.0	0.0	0.0	0.0	0.0	0.0	0.0	0.0	0.0	0.0	0.0	0.0	0.0	0.0
ENSDARG00000036613	403084	ensembl_gene_id	D. rerio	10454	H. sapiens	TAB1	TGF-beta activated kinase 1 (MAP3K7) binding protein 1	GO:0000185 activation of MAPKKK activity;GO:0002755 MyD88-dependent toll-like receptor signaling pathway;GO:0070423 nucleotide-binding oligomerization domain containing signaling pathway		Predicted intracellular proteins	Nuclear speckles (Enhanced); Additional: Cytosol	Manganese	(M20)PID P38 MKK3 6PATHWAY; (M76)PID P38 ALPHA BETA PATHWAY; (M23)PID WNT NONCANONICAL PATHWAY		0.0	0.0	0.0	0.0	0.0	0.0	0.0	0.0	0.0	1.0	0.0	0.0	0.0	0.0	0.0	0.0	1.0	0.0	0.0	0.0
ENSDARG00000036844	553550	ensembl_gene_id	D. rerio	283989	H. sapiens	TSEN54	tRNA splicing endonuclease subunit 54	GO:0000379 tRNA-type intron splice site recognition and cleavage;GO:0006388 tRNA splicing, via endonucleolytic cleavage and ligation;GO:0000394 RNA splicing, via endonucleolytic cleavage and ligation		Disease related genes; Predicted intracellular proteins	Nucleoplasm (Approved)				1.0	0.0	0.0	0.0	0.0	0.0	1.0	0.0	0.0	0.0	0.0	0.0	0.0	0.0	0.0	0.0	0.0	0.0	0.0	0.0
ENSDARG00000051754	557688	ensembl_gene_id	D. rerio	23322	H. sapiens	RPGRIP1L	RPGRIP1 like	GO:0046548 retinal rod cell development;GO:0021670 lateral ventricle development;GO:0043584 nose development		Disease related genes; Predicted intracellular proteins	Cytosol;Plasma membrane (Supported)				0.0	0.0	1.0	0.0	0.0	0.0	0.0	0.0	0.0	0.0	0.0	0.0	0.0	0.0	0.0	0.0	0.0	0.0	0.0	0.0
ENSDARG00000078981	563796	ensembl_gene_id	D. rerio	84553	H. sapiens	FAXC	failed axon connections homolog, metaxin like GST domain containing			Predicted intracellular proteins	Nucleoplasm (Approved)				0.0	0.0	0.0	0.0	0.0	0.0	0.0	0.0	0.0	0.0	0.0	0.0	0.0	0.0	0.0	0.0	0.0	0.0	0.0	0.0
ENSDARG00000080021	561535	ensembl_gene_id	D. rerio	64393	H. sapiens	ZMAT3	zinc finger matrin-type 3	GO:0040008 regulation of growth;GO:0006974 cellular response to DNA damage stimulus;GO:0040007 growth		Predicted intracellular proteins	Nucleoplasm (Supported)			(M5939)HALLMARK P53 PATHWAY	0.0	0.0	0.0	0.0	0.0	0.0	0.0	0.0	0.0	0.0	0.0	0.0	0.0	0.0	0.0	0.0	0.0	0.0	0.0	0.0
ENSDARG00000011579	58056	ensembl_gene_id	D. rerio	3205	H. sapiens	HOXA9	homeobox A9	GO:0042118 endothelial cell activation;GO:0060065 uterus development;GO:0060216 definitive hemopoiesis		Predicted intracellular proteins; Disease related genes; Cancer-related genes:Candidate cancer biomarkers; Transcription factors:Helix-turn-helix domains	Nucleoplasm (Enhanced)				0.0	0.0	0.0	0.0	0.0	0.0	0.0	0.0	0.0	0.0	0.0	0.0	0.0	0.0	0.0	0.0	0.0	0.0	0.0	0.0
ENSDARG00000075850	108179047	ensembl_gene_id	D. rerio	2778	H. sapiens	GNAS	GNAS complex locus	GO:0040032 post-embryonic body morphogenesis;GO:2000828 regulation of parathyroid hormone secretion;GO:0035898 parathyroid hormone secretion		Cancer-related genes:Mutational cancer driver genes; Disease related genes; Potential drug targets; Cancer-related genes:Candidate cancer biomarkers; Transporters:Accessory Factors Involved in Transport; Predicted intracellular proteins	Nucleoplasm (Approved); Additional: Cytosol;Plasma membrane	Colforsin; 2',5'-DIDEOXY-ADENOSINE 3'-MONOPHOSPHATE		(M5910)HALLMARK PROTEIN SECRETION	0.0	1.0	0.0	0.0	0.0	0.0	0.0	0.0	0.0	0.0	0.0	0.0	0.0	0.0	0.0	1.0	0.0	0.0	1.0	0.0
ENSDARG00000076867	557356	ensembl_gene_id	D. rerio	57496	H. sapiens	MRTFB	myocardin related transcription factor B	GO:0051145 smooth muscle cell differentiation;GO:0045844 positive regulation of striated muscle tissue development;GO:0048636 positive regulation of muscle organ development		Disease related genes; Predicted intracellular proteins	Nuclear speckles (Supported)				0.0	0.0	0.0	0.0	0.0	0.0	0.0	0.0	0.0	0.0	0.0	0.0	0.0	0.0	0.0	0.0	0.0	0.0	0.0	0.0
ENSDARG00000073743	387000	ensembl_gene_id	D. rerio	51312	H. sapiens	SLC25A37	solute carrier family 25 member 37	GO:0048250 iron import into the mitochondrion;GO:0097286 iron ion import;GO:0034755 iron ion transmembrane transport		Transporters:Electrochemical Potential-driven transporters; Predicted intracellular proteins	Mitochondria (Approved); Additional: Cytosol			(M5945)HALLMARK HEME METABOLISM	0.0	0.0	1.0	0.0	0.0	0.0	0.0	0.0	0.0	0.0	0.0	1.0	0.0	0.0	0.0	0.0	0.0	0.0	0.0	0.0
ENSDARG00000021086	550421	ensembl_gene_id	D. rerio	195828	H. sapiens	ZNF367	zinc finger protein 367	GO:0006357 regulation of transcription by RNA polymerase II;GO:0006366 transcription by RNA polymerase II;GO:0006355 regulation of transcription, DNA-templated		Predicted intracellular proteins	Nucleoplasm (Supported)				0.0	0.0	0.0	0.0	0.0	0.0	0.0	0.0	0.0	0.0	0.0	0.0	0.0	0.0	0.0	0.0	0.0	0.0	0.0	0.0
ENSDARG00000055607	561423	ensembl_gene_id	D. rerio	57530	H. sapiens	CGN	cingulin	GO:0007179 transforming growth factor beta receptor signaling pathway;GO:0071560 cellular response to transforming growth factor beta stimulus;GO:0071559 response to transforming growth factor beta		Predicted intracellular proteins	Cell Junctions;Plasma membrane (Supported)				0.0	0.0	0.0	0.0	0.0	0.0	0.0	0.0	0.0	0.0	0.0	0.0	0.0	0.0	0.0	0.0	0.0	0.0	0.0	0.0
ENSDARG00000074645	562358	ensembl_gene_id	D. rerio	79670	H. sapiens	TUT7	terminal uridylyl transferase 7	GO:0010525 regulation of transposition, RNA-mediated;GO:0010526 negative regulation of transposition, RNA-mediated;GO:1990074 polyuridylation-dependent mRNA catabolic process		ENZYME proteins:Transferases; Enzymes; Predicted intracellular proteins	Cytosol (Supported); Additional: Nucleoplasm				1.0	0.0	0.0	0.0	0.0	0.0	1.0	0.0	1.0	0.0	0.0	0.0	0.0	0.0	0.0	0.0	0.0	0.0	0.0	0.0
ENSDARG00000093207						None	None	None	None	None	None	None	None	None	nan	nan	nan	nan	nan	nan	nan	nan	nan	nan	nan	nan	nan	nan	nan	nan	nan	nan	nan	nan
ENSDARG00000002235	373882	ensembl_gene_id	D. rerio	4323	H. sapiens	MMP14	matrix metallopeptidase 14	GO:1990834 response to odorant;GO:0043615 astrocyte cell migration;GO:0045579 positive regulation of B cell differentiation		Peptidases:Metallopeptidases; ENZYME proteins:Hydrolases; Disease related genes; Enzymes; FDA approved drug targets:Small molecule drugs; Cancer-related genes:Candidate cancer biomarkers; Predicted intracellular proteins	Cytosol (Approved); Additional: Intermediate filaments	Marimastat	(M44)PID HIF2PATHWAY; (M281)PID FAK PATHWAY; (M3468)NABA ECM REGULATORS	(M5946)HALLMARK COAGULATION; (M5941)HALLMARK UV RESPONSE UP; (M5921)HALLMARK COMPLEMENT	1.0	0.0	0.0	1.0	1.0	0.0	0.0	0.0	0.0	0.0	0.0	0.0	1.0	1.0	0.0	0.0	0.0	0.0	0.0	0.0
ENSDARG00000062630	552915	ensembl_gene_id	D. rerio			None	None	None	None	None	None	None	None	None	nan	nan	nan	nan	nan	nan	nan	nan	nan	nan	nan	nan	nan	nan	nan	nan	nan	nan	nan	nan
ENSDARG00000063621	100148912	ensembl_gene_id	D. rerio	13	H. sapiens	AADAC	arylacetamide deacetylase	GO:0010898 positive regulation of triglyceride catabolic process;GO:0010896 regulation of triglyceride catabolic process;GO:0090208 positive regulation of triglyceride metabolic process		Enzymes; Predicted intracellular proteins; ENZYME proteins:Hydrolases					0.0	0.0	0.0	0.0	0.0	0.0	0.0	0.0	1.0	0.0	0.0	0.0	0.0	0.0	0.0	0.0	0.0	0.0	0.0	1.0
ENSDARG00000043237						None	None	None	None	None	None	None	None	None	nan	nan	nan	nan	nan	nan	nan	nan	nan	nan	nan	nan	nan	nan	nan	nan	nan	nan	nan	nan
ENSDARG00000054930	570573	ensembl_gene_id	D. rerio	131601	H. sapiens	TPRA1	transmembrane protein adipocyte associated 1	GO:0040016 embryonic cleavage;GO:1901991 negative regulation of mitotic cell cycle phase transition;GO:1901988 negative regulation of cell cycle phase transition		Predicted intracellular proteins	Vesicles (Approved)				0.0	0.0	0.0	0.0	0.0	0.0	0.0	0.0	0.0	0.0	0.0	0.0	0.0	0.0	0.0	0.0	0.0	0.0	0.0	0.0
ENSDARG00000097718	402943	ensembl_gene_id	D. rerio	10809	H. sapiens	STARD10	StAR related lipid transfer domain containing 10	GO:0006656 phosphatidylcholine biosynthetic process;GO:0046470 phosphatidylcholine metabolic process;GO:0097164 ammonium ion metabolic process		Predicted intracellular proteins	Cytosol (Supported)				0.0	0.0	1.0	0.0	0.0	0.0	0.0	0.0	0.0	0.0	0.0	0.0	0.0	0.0	0.0	0.0	0.0	0.0	0.0	0.0
ENSDARG00000070658	559081	ensembl_gene_id	D. rerio			None	None	None	None	None	None	None	None	None	nan	nan	nan	nan	nan	nan	nan	nan	nan	nan	nan	nan	nan	nan	nan	nan	nan	nan	nan	nan
ENSDARG00000100075	735312	ensembl_gene_id	D. rerio	9429	H. sapiens	ABCG2	ATP binding cassette subfamily G member 2 (Junior blood group)	GO:0097744 urate salt excretion;GO:0015878 biotin transport;GO:1990962 drug transport across blood-brain barrier		Predicted intracellular proteins; CD markers; Cancer-related genes:Candidate cancer biomarkers	Plasma membrane (Supported); Additional: Nucleoplasm	Biricodar; Avatrombopag	(M44)PID HIF2PATHWAY; (M255)PID HIF1 TFPATHWAY	(M5945)HALLMARK HEME METABOLISM	0.0	1.0	0.0	0.0	1.0	0.0	0.0	0.0	0.0	0.0	0.0	1.0	0.0	0.0	0.0	0.0	0.0	0.0	0.0	0.0
ENSDARG00000022841	557258	ensembl_gene_id	D. rerio	2185	H. sapiens	PTK2B	protein tyrosine kinase 2 beta	GO:2000537 regulation of B cell chemotaxis;GO:2000538 positive regulation of B cell chemotaxis;GO:0032960 regulation of inositol trisphosphate biosynthetic process	Tyr protein kinase family	Disease related genes; Kinases:Tyr protein kinases; ENZYME proteins:Transferases; Enzymes; FDA approved drug targets:Small molecule drugs; Predicted intracellular proteins	Cytosol;Plasma membrane (Supported)	Leflunomide; Genistein; 4-{[4-{[(1R,2R)-2-(dimethylamino)cyclopentyl]amino}-5-(trifluoromethyl)pyrimidin-2-yl]amino}-N-methylbenzenesulfonamide; Baricitinib; Fostamatinib	(M12771)SA PTEN PATHWAY; (M63)PID AVB3 OPN PATHWAY; (M275)PID ALPHA SYNUCLEIN PATHWAY	(M5908)HALLMARK ANDROGEN RESPONSE	1.0	0.0	1.0	1.0	1.0	0.0	0.0	0.0	1.0	0.0	0.0	1.0	0.0	0.0	0.0	1.0	1.0	0.0	1.0	1.0
ENSDARG00000020228	567297	ensembl_gene_id	D. rerio	7392	H. sapiens	USF2	upstream transcription factor 2, c-fos interacting	GO:0000430 regulation of transcription from RNA polymerase II promoter by glucose;GO:0000432 positive regulation of transcription from RNA polymerase II promoter by glucose;GO:0019086 late viral transcription		Transcription factors:Basic domains; Predicted intracellular proteins	Nucleoplasm (Supported); Additional: Vesicles		(M65)PID FRA PATHWAY		1.0	0.0	0.0	0.0	0.0	1.0	0.0	0.0	0.0	0.0	0.0	0.0	0.0	0.0	0.0	0.0	0.0	0.0	0.0	0.0
ENSDARG00000088117	100331714	ensembl_gene_id	D. rerio	2530	H. sapiens	FUT8	fucosyltransferase 8	GO:0036071 N-glycan fucosylation;GO:0033578 protein glycosylation in Golgi;GO:0046368 GDP-L-fucose metabolic process		ENZYME proteins:Transferases; Enzymes; Predicted intracellular proteins	Golgi apparatus (Approved); Additional: Cytosol;Nucleoplasm			(M5937)HALLMARK GLYCOLYSIS	0.0	0.0	1.0	0.0	1.0	0.0	0.0	0.0	0.0	0.0	0.0	0.0	0.0	0.0	0.0	0.0	1.0	0.0	0.0	0.0
ENSDARG00000102372	797430	ensembl_gene_id	D. rerio	10087	H. sapiens	CERT1	ceramide transporter 1	GO:0120012 intermembrane sphingolipid transfer;GO:0035621 ER to Golgi ceramide transport;GO:1902389 ceramide 1-phosphate transport		Disease related genes; Predicted intracellular proteins	Golgi apparatus (Enhanced); Additional: Nucleoplasm				0.0	1.0	0.0	0.0	0.0	0.0	0.0	0.0	0.0	0.0	0.0	0.0	0.0	0.0	0.0	0.0	0.0	0.0	0.0	0.0
ENSDARG00000076376	100002086	ensembl_gene_id	D. rerio	84286	H. sapiens	TMEM175	transmembrane protein 175	GO:0090385 phagosome-lysosome fusion;GO:0035751 regulation of lysosomal lumen pH;GO:0001845 phagolysosome assembly		Disease related genes; Transporters:Transporter channels and pores; Potential drug targets	Nuclear membrane;Nucleoplasm (Approved)				0.0	0.0	1.0	0.0	0.0	0.0	0.0	0.0	0.0	0.0	0.0	1.0	0.0	0.0	0.0	0.0	0.0	0.0	0.0	0.0
ENSDARG00000098824	100536716	ensembl_gene_id	D. rerio			None	None	None	None	None	None	None	None	None	nan	nan	nan	nan	nan	nan	nan	nan	nan	nan	nan	nan	nan	nan	nan	nan	nan	nan	nan	nan
ENSDARG00000102353	553715	ensembl_gene_id	D. rerio	51202	H. sapiens	DDX47	DEAD-box helicase 47	GO:0008625 extrinsic apoptotic signaling pathway via death domain receptors;GO:0097191 extrinsic apoptotic signaling pathway;GO:0006364 rRNA processing		Enzymes; Predicted intracellular proteins; ENZYME proteins:Hydrolases	Nucleoli (Supported)				1.0	0.0	0.0	0.0	0.0	0.0	1.0	0.0	0.0	0.0	0.0	0.0	0.0	0.0	0.0	0.0	0.0	0.0	0.0	0.0
ENSDARG00000063522	768303	ensembl_gene_id	D. rerio	585	H. sapiens	BBS4	Bardet-Biedl syndrome 4	GO:0038108 negative regulation of appetite by leptin-mediated signaling pathway;GO:0050893 sensory processing;GO:0060295 regulation of cilium movement involved in cell motility		Disease related genes; Predicted intracellular proteins	Cytosol (Supported)				0.0	0.0	1.0	0.0	0.0	1.0	0.0	0.0	0.0	0.0	0.0	0.0	0.0	0.0	0.0	1.0	0.0	0.0	0.0	1.0
ENSDARG00000036994	450056	ensembl_gene_id	D. rerio	125058	H. sapiens	TBC1D16	TBC1 domain family member 16	GO:0001919 regulation of receptor recycling;GO:0001881 receptor recycling;GO:1902017 regulation of cilium assembly		Predicted intracellular proteins	Intermediate filaments (Approved)				0.0	0.0	0.0	0.0	0.0	0.0	0.0	0.0	0.0	0.0	0.0	0.0	0.0	0.0	0.0	0.0	0.0	0.0	0.0	0.0
ENSDARG00000105215	796537	ensembl_gene_id	D. rerio			None	None	None	None	None	None	None	None	None	nan	nan	nan	nan	nan	nan	nan	nan	nan	nan	nan	nan	nan	nan	nan	nan	nan	nan	nan	nan
ENSDARG00000096322	100334958	ensembl_gene_id	D. rerio	7852	H. sapiens	CXCR4	C-X-C motif chemokine receptor 4	GO:0038159 C-X-C chemokine receptor CXCR4 signaling pathway;GO:0038160 CXCL12-activated CXCR4 signaling pathway;GO:2000448 positive regulation of macrophage migration inhibitory factor signaling pathway		CD markers; Transporters; Disease related genes; FDA approved drug targets:Small molecule drugs; G-protein coupled receptors:GPCRs excl olfactory receptors; Cancer-related genes:Candidate cancer biomarkers; G-protein coupled receptors:Chemokines and chemotactic factors receptors		Framycetin; AMD-070; Plerixafor; Ibalizumab	(M55)PID S1P S1P3 PATHWAY; (M257)PID EPHRINB REV PATHWAY; (M165)PID SYNDECAN 4 PATHWAY	(M5923)HALLMARK PI3K AKT MTOR SIGNALING; (M5891)HALLMARK HYPOXIA; (M5924)HALLMARK MTORC1 SIGNALING	1.0	0.0	0.0	1.0	1.0	0.0	0.0	0.0	0.0	0.0	0.0	1.0	0.0	0.0	0.0	0.0	1.0	0.0	1.0	0.0
ENSDARG00000099049	100000325	ensembl_gene_id	D. rerio			None	None	None	None	None	None	None	None	None	nan	nan	nan	nan	nan	nan	nan	nan	nan	nan	nan	nan	nan	nan	nan	nan	nan	nan	nan	nan
ENSDARG00000069113	561153	ensembl_gene_id	D. rerio	1627	H. sapiens	DBN1	drebrin 1	GO:0010643 cell communication by chemical coupling;GO:1902685 positive regulation of receptor localization to synapse;GO:0031915 positive regulation of synaptic plasticity		Predicted intracellular proteins	Actin filaments;Plasma membrane (Supported)				0.0	0.0	0.0	0.0	0.0	0.0	0.0	0.0	0.0	0.0	0.0	0.0	0.0	0.0	0.0	1.0	0.0	0.0	0.0	0.0
ENSDARG00000044954	556123	ensembl_gene_id	D. rerio	6585	H. sapiens	SLIT1	slit guidance ligand 1	GO:0033563 dorsal/ventral axon guidance;GO:0021834 chemorepulsion involved in embryonic olfactory bulb interneuron precursor migration;GO:0021831 embryonic olfactory bulb interneuron precursor migration		Predicted secreted proteins	Plasma membrane (Approved)		(M142)PID AJDISS 2PATHWAY; (M3008)NABA ECM GLYCOPROTEINS; (M5884)NABA CORE MATRISOME	(M5919)HALLMARK HEDGEHOG SIGNALING	1.0	0.0	0.0	0.0	0.0	0.0	0.0	0.0	0.0	0.0	0.0	0.0	1.0	0.0	0.0	0.0	0.0	0.0	0.0	0.0
ENSDARG00000068460	103911405	ensembl_gene_id	D. rerio			None	None	None	None	None	None	None	None	None	nan	nan	nan	nan	nan	nan	nan	nan	nan	nan	nan	nan	nan	nan	nan	nan	nan	nan	nan	nan
ENSDARG00000098674	100003520	ensembl_gene_id	D. rerio	8500	H. sapiens	PPFIA1	PTPRF interacting protein alpha 1	GO:1903077 negative regulation of protein localization to plasma membrane;GO:1904376 negative regulation of protein localization to cell periphery;GO:1905476 negative regulation of protein localization to membrane		Predicted intracellular proteins	Cytosol (Supported); Additional: Focal adhesion sites				1.0	0.0	0.0	0.0	0.0	0.0	0.0	0.0	0.0	0.0	0.0	0.0	1.0	0.0	0.0	1.0	0.0	1.0	0.0	0.0
ENSDARG00000041086	101886560	ensembl_gene_id	D. rerio	283652	H. sapiens	SLC24A5	solute carrier family 24 member 5	GO:0048022 negative regulation of melanin biosynthetic process;GO:1900377 negative regulation of secondary metabolite biosynthetic process;GO:0048021 regulation of melanin biosynthetic process		Disease related genes; Transporters:Electrochemical Potential-driven transporters; Potential drug targets					0.0	0.0	1.0	0.0	0.0	0.0	0.0	0.0	0.0	0.0	0.0	1.0	0.0	0.0	0.0	0.0	0.0	0.0	0.0	0.0
ENSDARG00000003631	352927	ensembl_gene_id	D. rerio	9575	H. sapiens	CLOCK	clock circadian regulator	GO:2000323 negative regulation of glucocorticoid receptor signaling pathway;GO:2000074 regulation of type B pancreatic cell development;GO:2000322 regulation of glucocorticoid receptor signaling pathway		ENZYME proteins:Transferases; Transcription factors:Basic domains; Enzymes; Predicted intracellular proteins	Nucleoplasm (Enhanced); Additional: Vesicles		(M95)PID CIRCADIAN PATHWAY		0.0	0.0	0.0	0.0	0.0	0.0	0.0	0.0	1.0	0.0	0.0	0.0	0.0	0.0	0.0	0.0	0.0	0.0	0.0	0.0
ENSDARG00000058369	569582	ensembl_gene_id	D. rerio	84206	H. sapiens	MEX3B	mex-3 RNA binding family member B	GO:0046777 protein autophosphorylation;GO:0006468 protein phosphorylation;GO:0016310 phosphorylation		Predicted intracellular proteins	Cytosol;Nucleoplasm (Approved)				0.0	0.0	0.0	0.0	0.0	0.0	0.0	0.0	0.0	0.0	0.0	0.0	0.0	0.0	0.0	0.0	0.0	0.0	0.0	0.0
ENSDARG00000098540	100003994	ensembl_gene_id	D. rerio			None	None	None	None	None	None	None	None	None	nan	nan	nan	nan	nan	nan	nan	nan	nan	nan	nan	nan	nan	nan	nan	nan	nan	nan	nan	nan
ENSDARG00000062134	565014	ensembl_gene_id	D. rerio			None	None	None	None	None	None	None	None	None	nan	nan	nan	nan	nan	nan	nan	nan	nan	nan	nan	nan	nan	nan	nan	nan	nan	nan	nan	nan
ENSDARG00000078172	101883373	ensembl_gene_id	D. rerio	5738	H. sapiens	PTGFRN	prostaglandin F2 receptor inhibitor	GO:0014905 myoblast fusion involved in skeletal muscle regeneration;GO:0014908 myotube differentiation involved in skeletal muscle regeneration;GO:0034389 lipid droplet organization		CD markers					0.0	0.0	0.0	0.0	0.0	0.0	0.0	0.0	0.0	0.0	0.0	0.0	0.0	0.0	0.0	0.0	0.0	0.0	0.0	0.0
ENSDARG00000078650	559036	ensembl_gene_id	D. rerio	3739	H. sapiens	KCNA4	potassium voltage-gated channel subfamily A member 4	GO:0051260 protein homooligomerization;GO:0071804 cellular potassium ion transport;GO:0071805 potassium ion transmembrane transport		FDA approved drug targets:Small molecule drugs; Voltage-gated ion channels:Voltage-Gated Potassium Channels		Arginineamide; Dalfampridine			0.0	0.0	1.0	0.0	0.0	0.0	0.0	0.0	0.0	0.0	0.0	0.0	0.0	0.0	0.0	0.0	0.0	1.0	0.0	0.0
ENSDARG00000094181	559364	ensembl_gene_id	D. rerio	134549	H. sapiens	SHROOM1	shroom family member 1	GO:0051017 actin filament bundle assembly;GO:0061572 actin filament bundle organization;GO:0007015 actin filament organization		Predicted intracellular proteins	Vesicles (Approved)			(M5893)HALLMARK MITOTIC SPINDLE	0.0	0.0	0.0	0.0	0.0	0.0	0.0	0.0	0.0	0.0	0.0	0.0	0.0	0.0	0.0	0.0	0.0	0.0	0.0	0.0
ENSDARG00000103144	492333	ensembl_gene_id	D. rerio	129285	H. sapiens	PPP1R21	protein phosphatase 1 regulatory subunit 21			Predicted intracellular proteins	Vesicles (Approved); Additional: Nucleoplasm				0.0	0.0	0.0	0.0	0.0	0.0	0.0	0.0	0.0	0.0	0.0	0.0	0.0	0.0	0.0	0.0	0.0	0.0	0.0	0.0
ENSDARG00000089200						None	None	None	None	None	None	None	None	None	nan	nan	nan	nan	nan	nan	nan	nan	nan	nan	nan	nan	nan	nan	nan	nan	nan	nan	nan	nan

## Sheet: Enrichment_MTZ_CBE
GroupID	Category	Term	Description	LogP	Log(q-value)	InTerm_InList	Genes	Symbols
1_Summary	Reactome Gene Sets	R-HSA-156842	Eukaryotic Translation Elongation	-34.2761	-30.179	35/93	1936,6129,6130,6136,6141,6146,6154,6155,6156,6160,6161,6164,6173,6175,6188,6191,6193,6201,6203,6206,6207,6209,6218,6222,6223,6224,6227,6228,6231,6232,6234,6235,7311,9349,200916,3646,8664,6745,6748,23480,28998,51023,54460,64979,64983,100529239,5518,85441,7965,9709,9631,79023,5464,128308,11345,120892,1211,25,5216,5687,6585,6921,7852,9978,57522,7832,11157,25804,57819,79670,208,3265,5584,10369,51125,…	EEF1D,RPL7,RPL7A,RPL12,RPL18,RPL22,RPL26,RPL27,RPL30,RPL31,RPL32,RPL34,RPL36A,RPLP0,RPS3,RPS4X,RPS5,RPS7,RPS9,RPS12,RPS13,RPS15,RPS17,RPS18,RPS19,RPS20,RPS21,RPS23,RPS26,RPS27,RPS28,RPS29,UBA52,RPL23,RPL22L1,EIF3E,EIF3D,SSR1,SSR4,SEC61G,MRPL13,MRPS18C,MRPS21,MRPL36,MRPL32,RPS10-NUDT3,PPP2R1A,HELZ2,AIMP2,HERPUD1,NUP155,NUP37,PPA1,MRPL55,GABARAPL2,LRRK2,CLTA,ABL1,PFN1,PSMA6,SLIT1,ELOC,CXCR4,RBX1,SR…
1_Member	Reactome Gene Sets	R-HSA-72764	Eukaryotic Translation Termination	-32.7994	-29.3435	34/93	6129,6130,6136,6141,6146,6154,6155,6156,6160,6161,6164,6173,6175,6188,6191,6193,6201,6203,6206,6207,6209,6218,6222,6223,6224,6227,6228,6231,6232,6234,6235,7311,9349,200916	RPL7,RPL7A,RPL12,RPL18,RPL22,RPL26,RPL27,RPL30,RPL31,RPL32,RPL34,RPL36A,RPLP0,RPS3,RPS4X,RPS5,RPS7,RPS9,RPS12,RPS13,RPS15,RPS17,RPS18,RPS19,RPS20,RPS21,RPS23,RPS26,RPS27,RPS28,RPS29,UBA52,RPL23,RPL22L1
1_Member	Reactome Gene Sets	R-HSA-156827	L13a-mediated translational silencing of Ceruloplasmin expression	-32.5258	-29.1211	36/111	3646,6129,6130,6136,6141,6146,6154,6155,6156,6160,6161,6164,6173,6175,6188,6191,6193,6201,6203,6206,6207,6209,6218,6222,6223,6224,6227,6228,6231,6232,6234,6235,7311,8664,9349,200916	EIF3E,RPL7,RPL7A,RPL12,RPL18,RPL22,RPL26,RPL27,RPL30,RPL31,RPL32,RPL34,RPL36A,RPLP0,RPS3,RPS4X,RPS5,RPS7,RPS9,RPS12,RPS13,RPS15,RPS17,RPS18,RPS19,RPS20,RPS21,RPS23,RPS26,RPS27,RPS28,RPS29,UBA52,EIF3D,RPL23,RPL22L1
1_Member	Reactome Gene Sets	R-HSA-975956	Nonsense Mediated Decay (NMD) independent of the Exon Junction Complex (EJC)	-32.4285	-29.0696	34/95	6129,6130,6136,6141,6146,6154,6155,6156,6160,6161,6164,6173,6175,6188,6191,6193,6201,6203,6206,6207,6209,6218,6222,6223,6224,6227,6228,6231,6232,6234,6235,7311,9349,200916	RPL7,RPL7A,RPL12,RPL18,RPL22,RPL26,RPL27,RPL30,RPL31,RPL32,RPL34,RPL36A,RPLP0,RPS3,RPS4X,RPS5,RPS7,RPS9,RPS12,RPS13,RPS15,RPS17,RPS18,RPS19,RPS20,RPS21,RPS23,RPS26,RPS27,RPS28,RPS29,UBA52,RPL23,RPL22L1
1_Member	Reactome Gene Sets	R-HSA-72706	GTP hydrolysis and joining of the 60S ribosomal subunit	-32.3657	-29.0482	36/112	3646,6129,6130,6136,6141,6146,6154,6155,6156,6160,6161,6164,6173,6175,6188,6191,6193,6201,6203,6206,6207,6209,6218,6222,6223,6224,6227,6228,6231,6232,6234,6235,7311,8664,9349,200916	EIF3E,RPL7,RPL7A,RPL12,RPL18,RPL22,RPL26,RPL27,RPL30,RPL31,RPL32,RPL34,RPL36A,RPLP0,RPS3,RPS4X,RPS5,RPS7,RPS9,RPS12,RPS13,RPS15,RPS17,RPS18,RPS19,RPS20,RPS21,RPS23,RPS26,RPS27,RPS28,RPS29,UBA52,EIF3D,RPL23,RPL22L1
1_Member	WikiPathways	WP477	Cytoplasmic Ribosomal Proteins	-32.0874	-28.8077	33/89	6129,6130,6136,6141,6146,6154,6155,6156,6160,6161,6164,6173,6175,6188,6191,6193,6201,6203,6206,6207,6209,6218,6222,6223,6224,6227,6228,6231,6232,6234,6235,7311,9349	RPL7,RPL7A,RPL12,RPL18,RPL22,RPL26,RPL27,RPL30,RPL31,RPL32,RPL34,RPL36A,RPLP0,RPS3,RPS4X,RPS5,RPS7,RPS9,RPS12,RPS13,RPS15,RPS17,RPS18,RPS19,RPS20,RPS21,RPS23,RPS26,RPS27,RPS28,RPS29,UBA52,RPL23
1_Member	KEGG Pathway	ko03010	Ribosome	-31.9346	-28.6896	40/153	6129,6130,6136,6141,6146,6154,6155,6156,6160,6161,6164,6173,6175,6188,6191,6193,6201,6203,6206,6207,6209,6218,6222,6223,6224,6227,6228,6231,6232,6234,6235,7311,9349,28998,51023,54460,64979,64983,200916,100529239	RPL7,RPL7A,RPL12,RPL18,RPL22,RPL26,RPL27,RPL30,RPL31,RPL32,RPL34,RPL36A,RPLP0,RPS3,RPS4X,RPS5,RPS7,RPS9,RPS12,RPS13,RPS15,RPS17,RPS18,RPS19,RPS20,RPS21,RPS23,RPS26,RPS27,RPS28,RPS29,UBA52,RPL23,MRPL13,MRPS18C,MRPS21,MRPL36,MRPL32,RPL22L1,RPS10-NUDT3
1_Member	Reactome Gene Sets	R-HSA-9633012	Response of EIF2AK4 (GCN2) to amino acid deficiency	-31.3744	-28.1616	34/101	6129,6130,6136,6141,6146,6154,6155,6156,6160,6161,6164,6173,6175,6188,6191,6193,6201,6203,6206,6207,6209,6218,6222,6223,6224,6227,6228,6231,6232,6234,6235,7311,9349,200916	RPL7,RPL7A,RPL12,RPL18,RPL22,RPL26,RPL27,RPL30,RPL31,RPL32,RPL34,RPL36A,RPLP0,RPS3,RPS4X,RPS5,RPS7,RPS9,RPS12,RPS13,RPS15,RPS17,RPS18,RPS19,RPS20,RPS21,RPS23,RPS26,RPS27,RPS28,RPS29,UBA52,RPL23,RPL22L1
1_Member	Reactome Gene Sets	R-HSA-72766	Translation	-28.3963	-25.4688	48/291	1936,3646,5464,6129,6130,6136,6141,6146,6154,6155,6156,6160,6161,6164,6173,6175,6188,6191,6193,6201,6203,6206,6207,6209,6218,6222,6223,6224,6227,6228,6231,6232,6234,6235,6745,6748,7311,7965,8664,9349,23480,28998,51023,54460,64979,64983,128308,200916	EEF1D,EIF3E,PPA1,RPL7,RPL7A,RPL12,RPL18,RPL22,RPL26,RPL27,RPL30,RPL31,RPL32,RPL34,RPL36A,RPLP0,RPS3,RPS4X,RPS5,RPS7,RPS9,RPS12,RPS13,RPS15,RPS17,RPS18,RPS19,RPS20,RPS21,RPS23,RPS26,RPS27,RPS28,RPS29,SSR1,SSR4,UBA52,AIMP2,EIF3D,RPL23,SEC61G,MRPL13,MRPS18C,MRPS21,MRPL36,MRPL32,MRPL55,RPL22L1
1_Member	GO Biological Processes	GO:0070972	protein localization to endoplasmic reticulum	-28.3373	-25.4256	37/152	6129,6130,6136,6141,6146,6154,6155,6156,6160,6161,6164,6173,6175,6188,6191,6193,6201,6203,6206,6207,6209,6218,6222,6223,6224,6227,6228,6231,6232,6234,6235,7311,9349,9709,11345,23480,120892	RPL7,RPL7A,RPL12,RPL18,RPL22,RPL26,RPL27,RPL30,RPL31,RPL32,RPL34,RPL36A,RPLP0,RPS3,RPS4X,RPS5,RPS7,RPS9,RPS12,RPS13,RPS15,RPS17,RPS18,RPS19,RPS20,RPS21,RPS23,RPS26,RPS27,RPS28,RPS29,UBA52,RPL23,HERPUD1,GABARAPL2,SEC61G,LRRK2
1_Member	Reactome Gene Sets	R-HSA-376176	Signaling by ROBO receptors	-27.6952	-24.8134	42/218	25,5216,5687,6129,6130,6136,6141,6146,6154,6155,6156,6160,6161,6164,6173,6175,6188,6191,6193,6201,6203,6206,6207,6209,6218,6222,6223,6224,6227,6228,6231,6232,6234,6235,6585,6921,7311,7852,9349,9978,57522,200916	ABL1,PFN1,PSMA6,RPL7,RPL7A,RPL12,RPL18,RPL22,RPL26,RPL27,RPL30,RPL31,RPL32,RPL34,RPL36A,RPLP0,RPS3,RPS4X,RPS5,RPS7,RPS9,RPS12,RPS13,RPS15,RPS17,RPS18,RPS19,RPS20,RPS21,RPS23,RPS26,RPS27,RPS28,RPS29,SLIT1,ELOC,UBA52,CXCR4,RPL23,RBX1,SRGAP1,RPL22L1
1_Member	Reactome Gene Sets	R-HSA-9010553	Regulation of expression of SLITs and ROBOs	-27.5094	-24.6556	38/171	5687,6129,6130,6136,6141,6146,6154,6155,6156,6160,6161,6164,6173,6175,6188,6191,6193,6201,6203,6206,6207,6209,6218,6222,6223,6224,6227,6228,6231,6232,6234,6235,6585,6921,7311,9349,9978,200916	PSMA6,RPL7,RPL7A,RPL12,RPL18,RPL22,RPL26,RPL27,RPL30,RPL31,RPL32,RPL34,RPL36A,RPLP0,RPS3,RPS4X,RPS5,RPS7,RPS9,RPS12,RPS13,RPS15,RPS17,RPS18,RPS19,RPS20,RPS21,RPS23,RPS26,RPS27,RPS28,RPS29,SLIT1,ELOC,UBA52,RPL23,RBX1,RPL22L1
1_Member	Reactome Gene Sets	R-HSA-72312	rRNA processing	-22.4259	-19.8151	36/204	6129,6130,6136,6141,6146,6154,6155,6156,6160,6161,6164,6173,6175,6188,6191,6193,6201,6203,6206,6207,6209,6218,6222,6223,6224,6227,6228,6231,6232,6234,6235,7311,9349,51202,55651,200916	RPL7,RPL7A,RPL12,RPL18,RPL22,RPL26,RPL27,RPL30,RPL31,RPL32,RPL34,RPL36A,RPLP0,RPS3,RPS4X,RPS5,RPS7,RPS9,RPS12,RPS13,RPS15,RPS17,RPS18,RPS19,RPS20,RPS21,RPS23,RPS26,RPS27,RPS28,RPS29,UBA52,RPL23,DDX47,NHP2,RPL22L1
1_Member	GO Biological Processes	GO:0006402	mRNA catabolic process	-22.3537	-19.7583	47/378	3646,5518,5687,6129,6130,6136,6141,6146,6154,6155,6156,6160,6161,6164,6173,6175,6188,6191,6193,6201,6203,6206,6207,6209,6218,6222,6223,6224,6227,6228,6231,6232,6234,6235,7311,7832,9349,9698,10644,11157,22882,23367,23589,25804,57819,79670,85441	EIF3E,PPP2R1A,PSMA6,RPL7,RPL7A,RPL12,RPL18,RPL22,RPL26,RPL27,RPL30,RPL31,RPL32,RPL34,RPL36A,RPLP0,RPS3,RPS4X,RPS5,RPS7,RPS9,RPS12,RPS13,RPS15,RPS17,RPS18,RPS19,RPS20,RPS21,RPS23,RPS26,RPS27,RPS28,RPS29,UBA52,BTG2,RPL23,PUM1,IGF2BP2,LSM6,ZHX2,LARP1,CARHSP1,LSM4,LSM2,TUT7,HELZ2
1_Member	CORUM	CORUM:305	40S ribosomal subunit, cytoplasmic	-21.5797	-19.0201	18/33	6188,6191,6193,6201,6203,6206,6207,6209,6218,6222,6223,6224,6227,6228,6231,6232,6234,6235	RPS3,RPS4X,RPS5,RPS7,RPS9,RPS12,RPS13,RPS15,RPS17,RPS18,RPS19,RPS20,RPS21,RPS23,RPS26,RPS27,RPS28,RPS29
1_Member	GO Biological Processes	GO:0046700	heterocycle catabolic process	-21.3464	-18.8004	63/725	215,230,668,2237,2821,2876,3005,3646,4860,5518,5563,5687,6129,6130,6136,6141,6146,6154,6155,6156,6160,6161,6164,6173,6175,6188,6191,6193,6201,6203,6206,6207,6209,6218,6222,6223,6224,6227,6228,6231,6232,6234,6235,7311,7832,8635,9349,9631,9698,10644,10891,11157,22882,23367,23589,25804,26330,51092,57819,79023,79670,84893,85441	ABCD1,ALDOC,FOXL2,FEN1,GPI,GPX1,H1-0,EIF3E,PNP,PPP2R1A,PRKAA2,PSMA6,RPL7,RPL7A,RPL12,RPL18,RPL22,RPL26,RPL27,RPL30,RPL31,RPL32,RPL34,RPL36A,RPLP0,RPS3,RPS4X,RPS5,RPS7,RPS9,RPS12,RPS13,RPS15,RPS17,RPS18,RPS19,RPS20,RPS21,RPS23,RPS26,RPS27,RPS28,RPS29,UBA52,BTG2,RNASET2,RPL23,NUP155,PUM1,IGF2BP2,PPARGC1A,LSM6,ZHX2,LARP1,CARHSP1,LSM4,GAPDHS,SIDT2,LSM2,NUP37,TUT7,FBH1,HELZ2
1_Member	GO Biological Processes	GO:0044270	cellular nitrogen compound catabolic process	-21.3151	-18.7757	63/726	215,230,668,2237,2821,2876,3005,3646,4860,5518,5563,5687,6129,6130,6136,6141,6146,6154,6155,6156,6160,6161,6164,6173,6175,6188,6191,6193,6201,6203,6206,6207,6209,6218,6222,6223,6224,6227,6228,6231,6232,6234,6235,7311,7832,8635,9349,9631,9698,10644,10891,11157,22882,23367,23589,25804,26330,51092,57819,79023,79670,84893,85441	ABCD1,ALDOC,FOXL2,FEN1,GPI,GPX1,H1-0,EIF3E,PNP,PPP2R1A,PRKAA2,PSMA6,RPL7,RPL7A,RPL12,RPL18,RPL22,RPL26,RPL27,RPL30,RPL31,RPL32,RPL34,RPL36A,RPLP0,RPS3,RPS4X,RPS5,RPS7,RPS9,RPS12,RPS13,RPS15,RPS17,RPS18,RPS19,RPS20,RPS21,RPS23,RPS26,RPS27,RPS28,RPS29,UBA52,BTG2,RNASET2,RPL23,NUP155,PUM1,IGF2BP2,PPARGC1A,LSM6,ZHX2,LARP1,CARHSP1,LSM4,GAPDHS,SIDT2,LSM2,NUP37,TUT7,FBH1,HELZ2
1_Member	GO Biological Processes	GO:0019439	aromatic compound catabolic process	-20.9435	-18.4234	63/738	215,230,668,2237,2821,2876,3005,3646,4860,5518,5563,5687,6129,6130,6136,6141,6146,6154,6155,6156,6160,6161,6164,6173,6175,6188,6191,6193,6201,6203,6206,6207,6209,6218,6222,6223,6224,6227,6228,6231,6232,6234,6235,7311,7832,8635,9349,9631,9698,10644,10891,11157,22882,23367,23589,25804,26330,51092,57819,79023,79670,84893,85441	ABCD1,ALDOC,FOXL2,FEN1,GPI,GPX1,H1-0,EIF3E,PNP,PPP2R1A,PRKAA2,PSMA6,RPL7,RPL7A,RPL12,RPL18,RPL22,RPL26,RPL27,RPL30,RPL31,RPL32,RPL34,RPL36A,RPLP0,RPS3,RPS4X,RPS5,RPS7,RPS9,RPS12,RPS13,RPS15,RPS17,RPS18,RPS19,RPS20,RPS21,RPS23,RPS26,RPS27,RPS28,RPS29,UBA52,BTG2,RNASET2,RPL23,NUP155,PUM1,IGF2BP2,PPARGC1A,LSM6,ZHX2,LARP1,CARHSP1,LSM4,GAPDHS,SIDT2,LSM2,NUP37,TUT7,FBH1,HELZ2
1_Member	CORUM	CORUM:338	40S ribosomal subunit, cytoplasmic	-20.4643	-17.9688	17/31	6188,6191,6193,6201,6203,6206,6207,6209,6218,6222,6223,6224,6227,6228,6231,6234,6235	RPS3,RPS4X,RPS5,RPS7,RPS9,RPS12,RPS13,RPS15,RPS17,RPS18,RPS19,RPS20,RPS21,RPS23,RPS26,RPS28,RPS29
1_Member	Reactome Gene Sets	R-HSA-72695	Formation of the ternary complex, and subsequently, the 43S complex	-20.2398	-17.7501	20/51	3646,6188,6191,6193,6201,6203,6206,6207,6209,6218,6222,6223,6224,6227,6228,6231,6232,6234,6235,8664	EIF3E,RPS3,RPS4X,RPS5,RPS7,RPS9,RPS12,RPS13,RPS15,RPS17,RPS18,RPS19,RPS20,RPS21,RPS23,RPS26,RPS27,RPS28,RPS29,EIF3D
1_Member	Reactome Gene Sets	R-HSA-71291	Metabolism of amino acids and derivatives	-19.9883	-17.5159	44/374	2653,4706,5160,5687,6129,6130,6136,6141,6146,6154,6155,6156,6160,6161,6164,6173,6175,6188,6191,6193,6201,6203,6206,6207,6209,6218,6222,6223,6224,6227,6228,6231,6232,6234,6235,6303,7311,7965,9349,10295,25828,51151,120103,200916	GCSH,NDUFAB1,PDHA1,PSMA6,RPL7,RPL7A,RPL12,RPL18,RPL22,RPL26,RPL27,RPL30,RPL31,RPL32,RPL34,RPL36A,RPLP0,RPS3,RPS4X,RPS5,RPS7,RPS9,RPS12,RPS13,RPS15,RPS17,RPS18,RPS19,RPS20,RPS21,RPS23,RPS26,RPS27,RPS28,RPS29,SAT1,UBA52,AIMP2,RPL23,BCKDK,TXN2,SLC45A2,SLC36A4,RPL22L1
1_Member	GO Biological Processes	GO:1901361	organic cyclic compound catabolic process	-19.8465	-17.3852	63/775	215,230,668,2237,2821,2876,3005,3646,4860,5518,5563,5687,6129,6130,6136,6141,6146,6154,6155,6156,6160,6161,6164,6173,6175,6188,6191,6193,6201,6203,6206,6207,6209,6218,6222,6223,6224,6227,6228,6231,6232,6234,6235,7311,7832,8635,9349,9631,9698,10644,10891,11157,22882,23367,23589,25804,26330,51092,57819,79023,79670,84893,85441	ABCD1,ALDOC,FOXL2,FEN1,GPI,GPX1,H1-0,EIF3E,PNP,PPP2R1A,PRKAA2,PSMA6,RPL7,RPL7A,RPL12,RPL18,RPL22,RPL26,RPL27,RPL30,RPL31,RPL32,RPL34,RPL36A,RPLP0,RPS3,RPS4X,RPS5,RPS7,RPS9,RPS12,RPS13,RPS15,RPS17,RPS18,RPS19,RPS20,RPS21,RPS23,RPS26,RPS27,RPS28,RPS29,UBA52,BTG2,RNASET2,RPL23,NUP155,PUM1,IGF2BP2,PPARGC1A,LSM6,ZHX2,LARP1,CARHSP1,LSM4,GAPDHS,SIDT2,LSM2,NUP37,TUT7,FBH1,HELZ2
1_Member	GO Biological Processes	GO:0006412	translation	-19.2836	-16.8385	60/725	208,708,1936,1956,2185,3646,3872,5036,5464,5725,6129,6130,6136,6141,6146,6154,6155,6156,6160,6161,6164,6173,6175,6188,6191,6193,6201,6203,6206,6207,6209,6218,6222,6223,6224,6227,6228,6231,6232,6234,6235,7311,7832,7965,8664,9349,9698,10399,10644,23367,28998,51023,51714,54460,64979,64983,84919,128308,143244,200916	AKT2,C1QBP,EEF1D,EGFR,PTK2B,EIF3E,KRT17,PA2G4,PPA1,PTBP1,RPL7,RPL7A,RPL12,RPL18,RPL22,RPL26,RPL27,RPL30,RPL31,RPL32,RPL34,RPL36A,RPLP0,RPS3,RPS4X,RPS5,RPS7,RPS9,RPS12,RPS13,RPS15,RPS17,RPS18,RPS19,RPS20,RPS21,RPS23,RPS26,RPS27,RPS28,RPS29,UBA52,BTG2,AIMP2,EIF3D,RPL23,PUM1,RACK1,IGF2BP2,LARP1,MRPL13,MRPS18C,SELENOT,MRPS21,MRPL36,MRPL32,PPP1R15B,MRPL55,EIF5AL1,RPL22L1
1_Member	GO Biological Processes	GO:0072657	protein localization to membrane	-19.2552	-16.8154	57/658	208,483,596,1956,3265,4323,5583,5584,6129,6130,6136,6141,6146,6154,6155,6156,6160,6161,6164,6173,6175,6188,6191,6193,6201,6203,6206,6207,6209,6218,6222,6223,6224,6227,6228,6231,6232,6234,6235,6745,7311,8266,8500,9135,9349,9631,10369,10399,10551,23480,26520,51125,51234,53616,79720,85358,93380	AKT2,ATP1B3,BCL2,EGFR,HRAS,MMP14,PRKCH,PRKCI,RPL7,RPL7A,RPL12,RPL18,RPL22,RPL26,RPL27,RPL30,RPL31,RPL32,RPL34,RPL36A,RPLP0,RPS3,RPS4X,RPS5,RPS7,RPS9,RPS12,RPS13,RPS15,RPS17,RPS18,RPS19,RPS20,RPS21,RPS23,RPS26,RPS27,RPS28,RPS29,SSR1,UBA52,UBL4A,PPFIA1,RABEP1,RPL23,NUP155,CACNG2,RACK1,AGR2,SEC61G,TIMM9,GOLGA7,EMC4,ADAM22,VPS37B,SHANK3,MMGT1
1_Member	GO Biological Processes	GO:0043043	peptide biosynthetic process	-19.2002	-16.7656	61/751	208,708,1936,1956,2185,3646,3872,5036,5464,5725,6129,6130,6136,6141,6146,6154,6155,6156,6160,6161,6164,6173,6175,6188,6191,6193,6201,6203,6206,6207,6209,6218,6222,6223,6224,6227,6228,6231,6232,6234,6235,7311,7832,7965,8664,9349,9698,10399,10644,23367,28998,51023,51714,54460,64127,64979,64983,84919,128308,143244,200916	AKT2,C1QBP,EEF1D,EGFR,PTK2B,EIF3E,KRT17,PA2G4,PPA1,PTBP1,RPL7,RPL7A,RPL12,RPL18,RPL22,RPL26,RPL27,RPL30,RPL31,RPL32,RPL34,RPL36A,RPLP0,RPS3,RPS4X,RPS5,RPS7,RPS9,RPS12,RPS13,RPS15,RPS17,RPS18,RPS19,RPS20,RPS21,RPS23,RPS26,RPS27,RPS28,RPS29,UBA52,BTG2,AIMP2,EIF3D,RPL23,PUM1,RACK1,IGF2BP2,LARP1,MRPL13,MRPS18C,SELENOT,MRPS21,NOD2,MRPL36,MRPL32,PPP1R15B,MRPL55,EIF5AL1,RPL22L1
1_Member	Reactome Gene Sets	R-HSA-72649	Translation initiation complex formation	-18.9209	-16.4965	20/58	3646,6188,6191,6193,6201,6203,6206,6207,6209,6218,6222,6223,6224,6227,6228,6231,6232,6234,6235,8664	EIF3E,RPS3,RPS4X,RPS5,RPS7,RPS9,RPS12,RPS13,RPS15,RPS17,RPS18,RPS19,RPS20,RPS21,RPS23,RPS26,RPS27,RPS28,RPS29,EIF3D
1_Member	Reactome Gene Sets	R-HSA-72702	Ribosomal scanning and start codon recognition	-18.9209	-16.4965	20/58	3646,6188,6191,6193,6201,6203,6206,6207,6209,6218,6222,6223,6224,6227,6228,6231,6232,6234,6235,8664	EIF3E,RPS3,RPS4X,RPS5,RPS7,RPS9,RPS12,RPS13,RPS15,RPS17,RPS18,RPS19,RPS20,RPS21,RPS23,RPS26,RPS27,RPS28,RPS29,EIF3D
1_Member	Reactome Gene Sets	R-HSA-8953854	Metabolism of RNA	-18.7946	-16.3752	57/673	5518,5687,5725,6129,6130,6136,6141,6146,6154,6155,6156,6160,6161,6164,6173,6175,6188,6191,6193,6201,6203,6206,6207,6209,6218,6222,6223,6224,6227,6228,6231,6232,6234,6235,6428,6632,6634,6635,6638,7311,8896,9349,9410,9631,10644,11157,25804,51202,51645,51691,55651,57819,79023,79670,200916,283989,404672	PPP2R1A,PSMA6,PTBP1,RPL7,RPL7A,RPL12,RPL18,RPL22,RPL26,RPL27,RPL30,RPL31,RPL32,RPL34,RPL36A,RPLP0,RPS3,RPS4X,RPS5,RPS7,RPS9,RPS12,RPS13,RPS15,RPS17,RPS18,RPS19,RPS20,RPS21,RPS23,RPS26,RPS27,RPS28,RPS29,SRSF3,SNRPD1,SNRPD3,SNRPE,SNRPN,UBA52,BUD31,RPL23,SNRNP40,NUP155,IGF2BP2,LSM6,LSM4,DDX47,PPIL1,LSM8,NHP2,LSM2,NUP37,TUT7,RPL22L1,TSEN54,GTF2H5
1_Member	Reactome Gene Sets	R-HSA-72662	Activation of the mRNA upon binding of the cap-binding complex and eIFs, and subsequent binding to 43S	-18.7494	-16.335	20/59	3646,6188,6191,6193,6201,6203,6206,6207,6209,6218,6222,6223,6224,6227,6228,6231,6232,6234,6235,8664	EIF3E,RPS3,RPS4X,RPS5,RPS7,RPS9,RPS12,RPS13,RPS15,RPS17,RPS18,RPS19,RPS20,RPS21,RPS23,RPS26,RPS27,RPS28,RPS29,EIF3D
1_Member	CORUM	CORUM:3055	Nop56p-associated pre-rRNA complex	-17.9821	-15.5774	24/104	59,6129,6130,6136,6141,6146,6154,6155,6156,6160,6161,6173,6175,6201,6203,6206,6207,6209,6218,6222,6228,6235,7846,9349	ACTA2,RPL7,RPL7A,RPL12,RPL18,RPL22,RPL26,RPL27,RPL30,RPL31,RPL32,RPL36A,RPLP0,RPS7,RPS9,RPS12,RPS13,RPS15,RPS17,RPS18,RPS23,RPS29,TUBA1A,RPL23
1_Member	GO Biological Processes	GO:0072594	establishment of protein localization to organelle	-17.5617	-15.1759	50/557	596,665,3916,6129,6130,6136,6141,6146,6154,6155,6156,6160,6161,6164,6173,6175,6188,6191,6193,6201,6203,6206,6207,6209,6218,6222,6223,6224,6227,6228,6231,6232,6234,6235,7311,9349,9631,9709,9765,9804,10245,10369,10575,23480,25793,26520,30849,79720,120892,144165	BCL2,BNIP3L,LAMP1,RPL7,RPL7A,RPL12,RPL18,RPL22,RPL26,RPL27,RPL30,RPL31,RPL32,RPL34,RPL36A,RPLP0,RPS3,RPS4X,RPS5,RPS7,RPS9,RPS12,RPS13,RPS15,RPS17,RPS18,RPS19,RPS20,RPS21,RPS23,RPS26,RPS27,RPS28,RPS29,UBA52,RPL23,NUP155,HERPUD1,ZFYVE16,TOMM20,TIMM17B,CACNG2,CCT4,SEC61G,FBXO7,TIMM9,PIK3R4,VPS37B,LRRK2,PRICKLE1
1_Member	CORUM	CORUM:308	60S ribosomal subunit, cytoplasmic	-13.7635	-11.446	15/47	6129,6130,6136,6141,6146,6154,6155,6156,6160,6161,6164,6173,6175,7311,9349	RPL7,RPL7A,RPL12,RPL18,RPL22,RPL26,RPL27,RPL30,RPL31,RPL32,RPL34,RPL36A,RPLP0,UBA52,RPL23
1_Member	GO Biological Processes	GO:0002181	cytoplasmic translation	-9.50502	-7.22166	16/102	3646,6141,6146,6154,6156,6160,6161,6173,6175,6227,6228,6231,6234,6235,8664,200916	EIF3E,RPL18,RPL22,RPL26,RPL30,RPL31,RPL32,RPL36A,RPLP0,RPS21,RPS23,RPS26,RPS28,RPS29,EIF3D,RPL22L1
1_Member	CORUM	CORUM:5380	TRBP containing complex (DICER, RPL7A, EIF6, MOV10 and subunits of the 60S ribosomal particle)	-6.27942	-4.16355	7/25	6129,6130,6136,6155,6156,6161,6164	RPL7,RPL7A,RPL12,RPL27,RPL30,RPL32,RPL34
2_Summary	GO Biological Processes	GO:0006119	oxidative phosphorylation	-27.5709	-24.7033	36/148	215,506,513,514,517,518,1337,1345,1347,1351,4508,4513,4514,4536,4694,4695,4698,4705,4706,4708,4713,4714,4715,4722,4723,4724,4729,9377,9551,10632,23479,51142,54205,65990,374291,790955,528,5464,51606,155066,5743,10625,80219,3945,4191,5160,55066,204,230,2821,5563,9631,10891,26330,79023,10159,7371,120892,1211,2876,2904,6667,6874,7417,208,551,2778,5290,27294,79689,79751,80025,114,3265,493753,4860,6319…	ABCD1,ATP5F1B,ATP5F1D,ATP5F1E,ATP5MC2,ATP5MC3,COX6A1,COX6C,COX7A2,COX8A,ATP6,COX2,COX3,ND2,NDUFA1,NDUFA2,NDUFA5,NDUFA10,NDUFAB1,NDUFB2,NDUFB7,NDUFB8,NDUFB9,NDUFS3,NDUFV1,NDUFS4,NDUFV2,COX5A,ATP5MF,ATP5MG,ISCU,CHCHD2,CYCS,ANTKMT,NDUFS7,UQCC3,ATP6V1C1,PPA1,ATP6V1H,ATP6V0E2,PTGS2,IVNS1ABP,COQ10B,LDHB,MDH2,PDHA1,PDPR,AK2,ALDOC,GPI,PRKAA2,NUP155,PPARGC1A,GAPDHS,NUP37,ATP6AP2,UCK2,LRRK2,CLTA,GPX1,GRIN2…
2_Member	GO Biological Processes	GO:0006119	oxidative phosphorylation	-27.5709	-24.7033	36/148	215,506,513,514,517,518,1337,1345,1347,1351,4508,4513,4514,4536,4694,4695,4698,4705,4706,4708,4713,4714,4715,4722,4723,4724,4729,9377,9551,10632,23479,51142,54205,65990,374291,790955	ABCD1,ATP5F1B,ATP5F1D,ATP5F1E,ATP5MC2,ATP5MC3,COX6A1,COX6C,COX7A2,COX8A,ATP6,COX2,COX3,ND2,NDUFA1,NDUFA2,NDUFA5,NDUFA10,NDUFAB1,NDUFB2,NDUFB7,NDUFB8,NDUFB9,NDUFS3,NDUFV1,NDUFS4,NDUFV2,COX5A,ATP5MF,ATP5MG,ISCU,CHCHD2,CYCS,ANTKMT,NDUFS7,UQCC3
2_Member	KEGG Pathway	ko00190	Oxidative phosphorylation	-26.8491	-24.0343	34/133	506,513,514,517,518,528,1337,1345,1347,1351,4508,4513,4514,4536,4694,4695,4698,4705,4706,4708,4713,4714,4715,4722,4723,4724,4729,5464,9377,9551,10632,51606,155066,374291	ATP5F1B,ATP5F1D,ATP5F1E,ATP5MC2,ATP5MC3,ATP6V1C1,COX6A1,COX6C,COX7A2,COX8A,ATP6,COX2,COX3,ND2,NDUFA1,NDUFA2,NDUFA5,NDUFA10,NDUFAB1,NDUFB2,NDUFB7,NDUFB8,NDUFB9,NDUFS3,NDUFV1,NDUFS4,NDUFV2,PPA1,COX5A,ATP5MF,ATP5MG,ATP6V1H,ATP6V0E2,NDUFS7
2_Member	WikiPathways	WP111	Electron Transport Chain (OXPHOS system in mitochondria)	-25.605	-22.8143	30/103	506,513,514,517,518,1337,1345,1347,1351,4508,4513,4514,4536,4694,4695,4698,4705,4706,4708,4713,4714,4715,4722,4723,4724,4729,9377,9551,10632,374291	ATP5F1B,ATP5F1D,ATP5F1E,ATP5MC2,ATP5MC3,COX6A1,COX6C,COX7A2,COX8A,ATP6,COX2,COX3,ND2,NDUFA1,NDUFA2,NDUFA5,NDUFA10,NDUFAB1,NDUFB2,NDUFB7,NDUFB8,NDUFB9,NDUFS3,NDUFV1,NDUFS4,NDUFV2,COX5A,ATP5MF,ATP5MG,NDUFS7
2_Member	KEGG Pathway	hsa00190	Oxidative phosphorylation	-25.5909	-22.8118	36/167	506,513,514,517,518,528,1337,1345,1347,1351,4508,4513,4514,4536,4694,4695,4698,4705,4706,4708,4713,4714,4715,4722,4723,4724,4729,5464,5743,9377,9551,10625,10632,51606,155066,374291	ATP5F1B,ATP5F1D,ATP5F1E,ATP5MC2,ATP5MC3,ATP6V1C1,COX6A1,COX6C,COX7A2,COX8A,ATP6,COX2,COX3,ND2,NDUFA1,NDUFA2,NDUFA5,NDUFA10,NDUFAB1,NDUFB2,NDUFB7,NDUFB8,NDUFB9,NDUFS3,NDUFV1,NDUFS4,NDUFV2,PPA1,PTGS2,COX5A,ATP5MF,IVNS1ABP,ATP5MG,ATP6V1H,ATP6V0E2,NDUFS7
2_Member	Reactome Gene Sets	R-HSA-163200	Respiratory electron transport, ATP synthesis by chemiosmotic coupling, and heat production by uncoupling proteins.	-24.0863	-21.3506	31/125	506,513,514,517,518,1337,1345,1351,4508,4513,4514,4536,4694,4695,4698,4705,4706,4708,4713,4714,4715,4722,4723,4724,4729,9377,9551,10632,54205,80219,374291	ATP5F1B,ATP5F1D,ATP5F1E,ATP5MC2,ATP5MC3,COX6A1,COX6C,COX8A,ATP6,COX2,COX3,ND2,NDUFA1,NDUFA2,NDUFA5,NDUFA10,NDUFAB1,NDUFB2,NDUFB7,NDUFB8,NDUFB9,NDUFS3,NDUFV1,NDUFS4,NDUFV2,COX5A,ATP5MF,ATP5MG,CYCS,COQ10B,NDUFS7
2_Member	Reactome Gene Sets	R-HSA-1428517	The citric acid (TCA) cycle and respiratory electron transport	-23.6364	-20.9209	35/176	506,513,514,517,518,1337,1345,1351,3945,4191,4508,4513,4514,4536,4694,4695,4698,4705,4706,4708,4713,4714,4715,4722,4723,4724,4729,5160,9377,9551,10632,54205,55066,80219,374291	ATP5F1B,ATP5F1D,ATP5F1E,ATP5MC2,ATP5MC3,COX6A1,COX6C,COX8A,LDHB,MDH2,ATP6,COX2,COX3,ND2,NDUFA1,NDUFA2,NDUFA5,NDUFA10,NDUFAB1,NDUFB2,NDUFB7,NDUFB8,NDUFB9,NDUFS3,NDUFV1,NDUFS4,NDUFV2,PDHA1,COX5A,ATP5MF,ATP5MG,CYCS,PDPR,COQ10B,NDUFS7
2_Member	GO Biological Processes	GO:0046034	ATP metabolic process	-23.1233	-20.472	44/313	204,215,230,506,513,514,517,518,1337,1345,1347,1351,2821,4508,4513,4514,4536,4694,4695,4698,4705,4706,4708,4713,4714,4715,4722,4723,4724,4729,5563,9377,9551,9631,10632,10891,23479,26330,51142,54205,65990,79023,374291,790955	AK2,ABCD1,ALDOC,ATP5F1B,ATP5F1D,ATP5F1E,ATP5MC2,ATP5MC3,COX6A1,COX6C,COX7A2,COX8A,GPI,ATP6,COX2,COX3,ND2,NDUFA1,NDUFA2,NDUFA5,NDUFA10,NDUFAB1,NDUFB2,NDUFB7,NDUFB8,NDUFB9,NDUFS3,NDUFV1,NDUFS4,NDUFV2,PRKAA2,COX5A,ATP5MF,NUP155,ATP5MG,PPARGC1A,ISCU,GAPDHS,CHCHD2,CYCS,ANTKMT,NUP37,NDUFS7,UQCC3
2_Member	WikiPathways	WP623	Oxidative phosphorylation	-22.9173	-20.2908	23/60	506,513,514,517,518,4508,4536,4695,4698,4705,4706,4708,4713,4714,4715,4722,4723,4724,4729,9551,10159,10632,374291	ATP5F1B,ATP5F1D,ATP5F1E,ATP5MC2,ATP5MC3,ATP6,ND2,NDUFA2,NDUFA5,NDUFA10,NDUFAB1,NDUFB2,NDUFB7,NDUFB8,NDUFB9,NDUFS3,NDUFV1,NDUFS4,NDUFV2,ATP5MF,ATP6AP2,ATP5MG,NDUFS7
2_Member	GO Biological Processes	GO:0009199	ribonucleoside triphosphate metabolic process	-22.9044	-20.2858	46/350	204,215,230,506,513,514,517,518,1337,1345,1347,1351,2821,4508,4513,4514,4536,4694,4695,4698,4705,4706,4708,4713,4714,4715,4722,4723,4724,4729,5563,7371,9377,9551,9631,10632,10891,23479,26330,51142,54205,65990,79023,120892,374291,790955	AK2,ABCD1,ALDOC,ATP5F1B,ATP5F1D,ATP5F1E,ATP5MC2,ATP5MC3,COX6A1,COX6C,COX7A2,COX8A,GPI,ATP6,COX2,COX3,ND2,NDUFA1,NDUFA2,NDUFA5,NDUFA10,NDUFAB1,NDUFB2,NDUFB7,NDUFB8,NDUFB9,NDUFS3,NDUFV1,NDUFS4,NDUFV2,PRKAA2,UCK2,COX5A,ATP5MF,NUP155,ATP5MG,PPARGC1A,ISCU,GAPDHS,CHCHD2,CYCS,ANTKMT,NUP37,LRRK2,NDUFS7,UQCC3
2_Member	GO Biological Processes	GO:0009205	purine ribonucleoside triphosphate metabolic process	-22.3812	-19.7782	45/343	204,215,230,506,513,514,517,518,1337,1345,1347,1351,2821,4508,4513,4514,4536,4694,4695,4698,4705,4706,4708,4713,4714,4715,4722,4723,4724,4729,5563,9377,9551,9631,10632,10891,23479,26330,51142,54205,65990,79023,120892,374291,790955	AK2,ABCD1,ALDOC,ATP5F1B,ATP5F1D,ATP5F1E,ATP5MC2,ATP5MC3,COX6A1,COX6C,COX7A2,COX8A,GPI,ATP6,COX2,COX3,ND2,NDUFA1,NDUFA2,NDUFA5,NDUFA10,NDUFAB1,NDUFB2,NDUFB7,NDUFB8,NDUFB9,NDUFS3,NDUFV1,NDUFS4,NDUFV2,PRKAA2,COX5A,ATP5MF,NUP155,ATP5MG,PPARGC1A,ISCU,GAPDHS,CHCHD2,CYCS,ANTKMT,NUP37,LRRK2,NDUFS7,UQCC3
2_Member	KEGG Pathway	ko05016	Huntington's disease	-22.2273	-19.6393	35/193	506,513,514,517,518,1211,1337,1345,1347,1351,2876,2904,4508,4513,4514,4694,4695,4698,4705,4706,4708,4713,4714,4715,4722,4723,4724,4729,6667,6874,7417,9377,10891,54205,374291	ATP5F1B,ATP5F1D,ATP5F1E,ATP5MC2,ATP5MC3,CLTA,COX6A1,COX6C,COX7A2,COX8A,GPX1,GRIN2B,ATP6,COX2,COX3,NDUFA1,NDUFA2,NDUFA5,NDUFA10,NDUFAB1,NDUFB2,NDUFB7,NDUFB8,NDUFB9,NDUFS3,NDUFV1,NDUFS4,NDUFV2,SP1,TAF4,VDAC2,COX5A,PPARGC1A,CYCS,NDUFS7
2_Member	GO Biological Processes	GO:0006091	generation of precursor metabolites and energy	-22.1895	-19.6087	54/512	208,215,230,506,513,514,517,518,551,1337,1345,1347,1351,2778,2821,4191,4508,4513,4514,4536,4694,4695,4698,4705,4706,4708,4713,4714,4715,4722,4723,4724,4729,5160,5290,5563,9377,9551,9631,10632,10891,23479,26330,27294,51142,54205,65990,79023,79689,79751,80025,80219,374291,790955	AKT2,ABCD1,ALDOC,ATP5F1B,ATP5F1D,ATP5F1E,ATP5MC2,ATP5MC3,AVP,COX6A1,COX6C,COX7A2,COX8A,GNAS,GPI,MDH2,ATP6,COX2,COX3,ND2,NDUFA1,NDUFA2,NDUFA5,NDUFA10,NDUFAB1,NDUFB2,NDUFB7,NDUFB8,NDUFB9,NDUFS3,NDUFV1,NDUFS4,NDUFV2,PDHA1,PIK3CA,PRKAA2,COX5A,ATP5MF,NUP155,ATP5MG,PPARGC1A,ISCU,GAPDHS,DHDH,CHCHD2,CYCS,ANTKMT,NUP37,STEAP4,SLC25A22,PANK2,COQ10B,NDUFS7,UQCC3
2_Member	GO Biological Processes	GO:0009144	purine nucleoside triphosphate metabolic process	-22.068	-19.4944	45/349	204,215,230,506,513,514,517,518,1337,1345,1347,1351,2821,4508,4513,4514,4536,4694,4695,4698,4705,4706,4708,4713,4714,4715,4722,4723,4724,4729,5563,9377,9551,9631,10632,10891,23479,26330,51142,54205,65990,79023,120892,374291,790955	AK2,ABCD1,ALDOC,ATP5F1B,ATP5F1D,ATP5F1E,ATP5MC2,ATP5MC3,COX6A1,COX6C,COX7A2,COX8A,GPI,ATP6,COX2,COX3,ND2,NDUFA1,NDUFA2,NDUFA5,NDUFA10,NDUFAB1,NDUFB2,NDUFB7,NDUFB8,NDUFB9,NDUFS3,NDUFV1,NDUFS4,NDUFV2,PRKAA2,COX5A,ATP5MF,NUP155,ATP5MG,PPARGC1A,ISCU,GAPDHS,CHCHD2,CYCS,ANTKMT,NUP37,LRRK2,NDUFS7,UQCC3
2_Member	GO Biological Processes	GO:0009141	nucleoside triphosphate metabolic process	-21.9816	-19.415	46/368	204,215,230,506,513,514,517,518,1337,1345,1347,1351,2821,4508,4513,4514,4536,4694,4695,4698,4705,4706,4708,4713,4714,4715,4722,4723,4724,4729,5563,7371,9377,9551,9631,10632,10891,23479,26330,51142,54205,65990,79023,120892,374291,790955	AK2,ABCD1,ALDOC,ATP5F1B,ATP5F1D,ATP5F1E,ATP5MC2,ATP5MC3,COX6A1,COX6C,COX7A2,COX8A,GPI,ATP6,COX2,COX3,ND2,NDUFA1,NDUFA2,NDUFA5,NDUFA10,NDUFAB1,NDUFB2,NDUFB7,NDUFB8,NDUFB9,NDUFS3,NDUFV1,NDUFS4,NDUFV2,PRKAA2,UCK2,COX5A,ATP5MF,NUP155,ATP5MG,PPARGC1A,ISCU,GAPDHS,CHCHD2,CYCS,ANTKMT,NUP37,LRRK2,NDUFS7,UQCC3
2_Member	KEGG Pathway	hsa05012	Parkinson disease	-21.382	-18.8292	33/177	506,513,514,517,518,1337,1345,1347,1351,4508,4513,4514,4536,4694,4695,4698,4705,4706,4708,4713,4714,4715,4722,4723,4724,4729,5743,7417,9377,10625,54205,120892,374291	ATP5F1B,ATP5F1D,ATP5F1E,ATP5MC2,ATP5MC3,COX6A1,COX6C,COX7A2,COX8A,ATP6,COX2,COX3,ND2,NDUFA1,NDUFA2,NDUFA5,NDUFA10,NDUFAB1,NDUFB2,NDUFB7,NDUFB8,NDUFB9,NDUFS3,NDUFV1,NDUFS4,NDUFV2,PTGS2,VDAC2,COX5A,IVNS1ABP,CYCS,LRRK2,NDUFS7
2_Member	KEGG Pathway	hsa05016	Huntington disease	-21.1301	-18.5973	36/222	506,513,514,517,518,1211,1337,1345,1347,1351,2876,2904,4508,4513,4514,4694,4695,4698,4705,4706,4708,4713,4714,4715,4722,4723,4724,4729,5743,6667,6874,7417,9377,10891,54205,374291	ATP5F1B,ATP5F1D,ATP5F1E,ATP5MC2,ATP5MC3,CLTA,COX6A1,COX6C,COX7A2,COX8A,GPX1,GRIN2B,ATP6,COX2,COX3,NDUFA1,NDUFA2,NDUFA5,NDUFA10,NDUFAB1,NDUFB2,NDUFB7,NDUFB8,NDUFB9,NDUFS3,NDUFV1,NDUFS4,NDUFV2,PTGS2,SP1,TAF4,VDAC2,COX5A,PPARGC1A,CYCS,NDUFS7
2_Member	GO Biological Processes	GO:0009161	ribonucleoside monophosphate metabolic process	-20.9744	-18.448	45/371	204,215,230,506,513,514,517,518,1337,1345,1347,1351,2821,4508,4513,4514,4536,4694,4695,4698,4705,4706,4708,4713,4714,4715,4722,4723,4724,4729,5563,7371,9377,9551,9631,10632,10891,23479,26330,51142,54205,65990,79023,374291,790955	AK2,ABCD1,ALDOC,ATP5F1B,ATP5F1D,ATP5F1E,ATP5MC2,ATP5MC3,COX6A1,COX6C,COX7A2,COX8A,GPI,ATP6,COX2,COX3,ND2,NDUFA1,NDUFA2,NDUFA5,NDUFA10,NDUFAB1,NDUFB2,NDUFB7,NDUFB8,NDUFB9,NDUFS3,NDUFV1,NDUFS4,NDUFV2,PRKAA2,UCK2,COX5A,ATP5MF,NUP155,ATP5MG,PPARGC1A,ISCU,GAPDHS,CHCHD2,CYCS,ANTKMT,NUP37,NDUFS7,UQCC3
2_Member	GO Biological Processes	GO:0009167	purine ribonucleoside monophosphate metabolic process	-20.8922	-18.3784	44/355	204,215,230,506,513,514,517,518,1337,1345,1347,1351,2821,4508,4513,4514,4536,4694,4695,4698,4705,4706,4708,4713,4714,4715,4722,4723,4724,4729,5563,9377,9551,9631,10632,10891,23479,26330,51142,54205,65990,79023,374291,790955	AK2,ABCD1,ALDOC,ATP5F1B,ATP5F1D,ATP5F1E,ATP5MC2,ATP5MC3,COX6A1,COX6C,COX7A2,COX8A,GPI,ATP6,COX2,COX3,ND2,NDUFA1,NDUFA2,NDUFA5,NDUFA10,NDUFAB1,NDUFB2,NDUFB7,NDUFB8,NDUFB9,NDUFS3,NDUFV1,NDUFS4,NDUFV2,PRKAA2,COX5A,ATP5MF,NUP155,ATP5MG,PPARGC1A,ISCU,GAPDHS,CHCHD2,CYCS,ANTKMT,NUP37,NDUFS7,UQCC3
2_Member	GO Biological Processes	GO:0009126	purine nucleoside monophosphate metabolic process	-20.7942	-18.2866	44/357	204,215,230,506,513,514,517,518,1337,1345,1347,1351,2821,4508,4513,4514,4536,4694,4695,4698,4705,4706,4708,4713,4714,4715,4722,4723,4724,4729,5563,9377,9551,9631,10632,10891,23479,26330,51142,54205,65990,79023,374291,790955	AK2,ABCD1,ALDOC,ATP5F1B,ATP5F1D,ATP5F1E,ATP5MC2,ATP5MC3,COX6A1,COX6C,COX7A2,COX8A,GPI,ATP6,COX2,COX3,ND2,NDUFA1,NDUFA2,NDUFA5,NDUFA10,NDUFAB1,NDUFB2,NDUFB7,NDUFB8,NDUFB9,NDUFS3,NDUFV1,NDUFS4,NDUFV2,PRKAA2,COX5A,ATP5MF,NUP155,ATP5MG,PPARGC1A,ISCU,GAPDHS,CHCHD2,CYCS,ANTKMT,NUP37,NDUFS7,UQCC3
2_Member	GO Biological Processes	GO:0045333	cellular respiration	-20.5984	-18.0968	33/187	513,1337,1345,1351,4191,4513,4514,4536,4694,4695,4698,4705,4706,4708,4713,4714,4715,4722,4723,4724,4729,5160,5290,9377,10891,23479,51142,54205,79751,80025,80219,374291,790955	ATP5F1D,COX6A1,COX6C,COX8A,MDH2,COX2,COX3,ND2,NDUFA1,NDUFA2,NDUFA5,NDUFA10,NDUFAB1,NDUFB2,NDUFB7,NDUFB8,NDUFB9,NDUFS3,NDUFV1,NDUFS4,NDUFV2,PDHA1,PIK3CA,COX5A,PPARGC1A,ISCU,CHCHD2,CYCS,SLC25A22,PANK2,COQ10B,NDUFS7,UQCC3
2_Member	GO Biological Processes	GO:0009123	nucleoside monophosphate metabolic process	-20.1834	-17.6995	45/388	204,215,230,506,513,514,517,518,1337,1345,1347,1351,2821,4508,4513,4514,4536,4694,4695,4698,4705,4706,4708,4713,4714,4715,4722,4723,4724,4729,5563,7371,9377,9551,9631,10632,10891,23479,26330,51142,54205,65990,79023,374291,790955	AK2,ABCD1,ALDOC,ATP5F1B,ATP5F1D,ATP5F1E,ATP5MC2,ATP5MC3,COX6A1,COX6C,COX7A2,COX8A,GPI,ATP6,COX2,COX3,ND2,NDUFA1,NDUFA2,NDUFA5,NDUFA10,NDUFAB1,NDUFB2,NDUFB7,NDUFB8,NDUFB9,NDUFS3,NDUFV1,NDUFS4,NDUFV2,PRKAA2,UCK2,COX5A,ATP5MF,NUP155,ATP5MG,PPARGC1A,ISCU,GAPDHS,CHCHD2,CYCS,ANTKMT,NUP37,NDUFS7,UQCC3
2_Member	GO Biological Processes	GO:0022904	respiratory electron transport chain	-20.1562	-17.6782	27/117	1337,1345,1351,4513,4514,4536,4694,4695,4698,4705,4706,4708,4713,4714,4715,4722,4723,4724,4729,9377,10891,23479,51142,54205,79751,374291,790955	COX6A1,COX6C,COX8A,COX2,COX3,ND2,NDUFA1,NDUFA2,NDUFA5,NDUFA10,NDUFAB1,NDUFB2,NDUFB7,NDUFB8,NDUFB9,NDUFS3,NDUFV1,NDUFS4,NDUFV2,COX5A,PPARGC1A,ISCU,CHCHD2,CYCS,SLC25A22,NDUFS7,UQCC3
2_Member	KEGG Pathway	hsa04714	thermogenesis	-19.9291	-17.4623	38/272	114,506,513,514,517,518,1337,1345,1347,1351,2778,3265,4508,4513,4514,4536,4694,4695,4698,4705,4706,4708,4713,4714,4715,4722,4723,4724,4729,5563,5743,9377,9551,10625,10632,10891,374291,493753	ADCY8,ATP5F1B,ATP5F1D,ATP5F1E,ATP5MC2,ATP5MC3,COX6A1,COX6C,COX7A2,COX8A,GNAS,HRAS,ATP6,COX2,COX3,ND2,NDUFA1,NDUFA2,NDUFA5,NDUFA10,NDUFAB1,NDUFB2,NDUFB7,NDUFB8,NDUFB9,NDUFS3,NDUFV1,NDUFS4,NDUFV2,PRKAA2,PTGS2,COX5A,ATP5MF,IVNS1ABP,ATP5MG,PPARGC1A,NDUFS7,COA5
2_Member	GO Biological Processes	GO:0042775	mitochondrial ATP synthesis coupled electron transport	-19.7423	-17.2865	25/99	1337,1345,1351,4513,4514,4536,4694,4695,4698,4705,4706,4708,4713,4714,4715,4722,4723,4724,4729,9377,23479,51142,54205,374291,790955	COX6A1,COX6C,COX8A,COX2,COX3,ND2,NDUFA1,NDUFA2,NDUFA5,NDUFA10,NDUFAB1,NDUFB2,NDUFB7,NDUFB8,NDUFB9,NDUFS3,NDUFV1,NDUFS4,NDUFV2,COX5A,ISCU,CHCHD2,CYCS,NDUFS7,UQCC3
2_Member	GO Biological Processes	GO:0042773	ATP synthesis coupled electron transport	-19.6256	-17.1752	25/100	1337,1345,1351,4513,4514,4536,4694,4695,4698,4705,4706,4708,4713,4714,4715,4722,4723,4724,4729,9377,23479,51142,54205,374291,790955	COX6A1,COX6C,COX8A,COX2,COX3,ND2,NDUFA1,NDUFA2,NDUFA5,NDUFA10,NDUFAB1,NDUFB2,NDUFB7,NDUFB8,NDUFB9,NDUFS3,NDUFV1,NDUFS4,NDUFV2,COX5A,ISCU,CHCHD2,CYCS,NDUFS7,UQCC3
2_Member	GO Biological Processes	GO:0022900	electron transport chain	-18.1858	-15.7763	30/178	1337,1345,1347,1351,4513,4514,4536,4694,4695,4698,4705,4706,4708,4713,4714,4715,4722,4723,4724,4729,9377,10891,23479,27294,51142,54205,79689,79751,374291,790955	COX6A1,COX6C,COX7A2,COX8A,COX2,COX3,ND2,NDUFA1,NDUFA2,NDUFA5,NDUFA10,NDUFAB1,NDUFB2,NDUFB7,NDUFB8,NDUFB9,NDUFS3,NDUFV1,NDUFS4,NDUFV2,COX5A,PPARGC1A,ISCU,DHDH,CHCHD2,CYCS,STEAP4,SLC25A22,NDUFS7,UQCC3
2_Member	GO Biological Processes	GO:0006163	purine nucleotide metabolic process	-17.7809	-15.381	52/594	114,204,215,230,506,513,514,517,518,1337,1345,1347,1351,2821,2876,4508,4513,4514,4536,4694,4695,4698,4705,4706,4708,4713,4714,4715,4722,4723,4724,4729,4860,5160,5563,6319,9377,9551,9631,10632,10891,23479,26330,51142,54205,55066,65990,79023,80025,120892,374291,790955	ADCY8,AK2,ABCD1,ALDOC,ATP5F1B,ATP5F1D,ATP5F1E,ATP5MC2,ATP5MC3,COX6A1,COX6C,COX7A2,COX8A,GPI,GPX1,ATP6,COX2,COX3,ND2,NDUFA1,NDUFA2,NDUFA5,NDUFA10,NDUFAB1,NDUFB2,NDUFB7,NDUFB8,NDUFB9,NDUFS3,NDUFV1,NDUFS4,NDUFV2,PNP,PDHA1,PRKAA2,SCD,COX5A,ATP5MF,NUP155,ATP5MG,PPARGC1A,ISCU,GAPDHS,CHCHD2,CYCS,PDPR,ANTKMT,NUP37,PANK2,LRRK2,NDUFS7,UQCC3
2_Member	GO Biological Processes	GO:0009259	ribonucleotide metabolic process	-17.6853	-15.2902	51/575	114,204,215,230,506,513,514,517,518,1337,1345,1347,1351,2821,4508,4513,4514,4536,4694,4695,4698,4705,4706,4708,4713,4714,4715,4722,4723,4724,4729,5160,5563,6319,7371,9377,9551,9631,10632,10891,23479,26330,51142,54205,55066,65990,79023,80025,120892,374291,790955	ADCY8,AK2,ABCD1,ALDOC,ATP5F1B,ATP5F1D,ATP5F1E,ATP5MC2,ATP5MC3,COX6A1,COX6C,COX7A2,COX8A,GPI,ATP6,COX2,COX3,ND2,NDUFA1,NDUFA2,NDUFA5,NDUFA10,NDUFAB1,NDUFB2,NDUFB7,NDUFB8,NDUFB9,NDUFS3,NDUFV1,NDUFS4,NDUFV2,PDHA1,PRKAA2,SCD,UCK2,COX5A,ATP5MF,NUP155,ATP5MG,PPARGC1A,ISCU,GAPDHS,CHCHD2,CYCS,PDPR,ANTKMT,NUP37,PANK2,LRRK2,NDUFS7,UQCC3
2_Member	KEGG Pathway	ko05010	Alzheimer's disease	-17.6752	-15.2847	29/171	506,513,514,517,518,1337,1345,1347,1351,2904,4508,4513,4514,4694,4695,4698,4705,4706,4708,4713,4714,4715,4722,4723,4724,4729,9377,54205,374291	ATP5F1B,ATP5F1D,ATP5F1E,ATP5MC2,ATP5MC3,COX6A1,COX6C,COX7A2,COX8A,GRIN2B,ATP6,COX2,COX3,NDUFA1,NDUFA2,NDUFA5,NDUFA10,NDUFAB1,NDUFB2,NDUFB7,NDUFB8,NDUFB9,NDUFS3,NDUFV1,NDUFS4,NDUFV2,COX5A,CYCS,NDUFS7
2_Member	GO Biological Processes	GO:0009150	purine ribonucleotide metabolic process	-17.5291	-15.1479	50/558	114,204,215,230,506,513,514,517,518,1337,1345,1347,1351,2821,4508,4513,4514,4536,4694,4695,4698,4705,4706,4708,4713,4714,4715,4722,4723,4724,4729,5160,5563,6319,9377,9551,9631,10632,10891,23479,26330,51142,54205,55066,65990,79023,80025,120892,374291,790955	ADCY8,AK2,ABCD1,ALDOC,ATP5F1B,ATP5F1D,ATP5F1E,ATP5MC2,ATP5MC3,COX6A1,COX6C,COX7A2,COX8A,GPI,ATP6,COX2,COX3,ND2,NDUFA1,NDUFA2,NDUFA5,NDUFA10,NDUFAB1,NDUFB2,NDUFB7,NDUFB8,NDUFB9,NDUFS3,NDUFV1,NDUFS4,NDUFV2,PDHA1,PRKAA2,SCD,COX5A,ATP5MF,NUP155,ATP5MG,PPARGC1A,ISCU,GAPDHS,CHCHD2,CYCS,PDPR,ANTKMT,NUP37,PANK2,LRRK2,NDUFS7,UQCC3
2_Member	GO Biological Processes	GO:0072521	purine-containing compound metabolic process	-17.4224	-15.0458	53/628	114,204,215,230,506,513,514,517,518,1337,1345,1347,1351,2821,2876,4508,4513,4514,4536,4694,4695,4698,4705,4706,4708,4713,4714,4715,4722,4723,4724,4729,4860,5160,5563,6319,9377,9429,9551,9631,10632,10891,23479,26330,51142,54205,55066,65990,79023,80025,120892,374291,790955	ADCY8,AK2,ABCD1,ALDOC,ATP5F1B,ATP5F1D,ATP5F1E,ATP5MC2,ATP5MC3,COX6A1,COX6C,COX7A2,COX8A,GPI,GPX1,ATP6,COX2,COX3,ND2,NDUFA1,NDUFA2,NDUFA5,NDUFA10,NDUFAB1,NDUFB2,NDUFB7,NDUFB8,NDUFB9,NDUFS3,NDUFV1,NDUFS4,NDUFV2,PNP,PDHA1,PRKAA2,SCD,COX5A,ABCG2,ATP5MF,NUP155,ATP5MG,PPARGC1A,ISCU,GAPDHS,CHCHD2,CYCS,PDPR,ANTKMT,NUP37,PANK2,LRRK2,NDUFS7,UQCC3
2_Member	Reactome Gene Sets	R-HSA-611105	Respiratory electron transport	-17.1192	-14.747	23/101	1337,1345,1351,4513,4514,4536,4694,4695,4698,4705,4706,4708,4713,4714,4715,4722,4723,4724,4729,9377,54205,80219,374291	COX6A1,COX6C,COX8A,COX2,COX3,ND2,NDUFA1,NDUFA2,NDUFA5,NDUFA10,NDUFAB1,NDUFB2,NDUFB7,NDUFB8,NDUFB9,NDUFS3,NDUFV1,NDUFS4,NDUFV2,COX5A,CYCS,COQ10B,NDUFS7
2_Member	GO Biological Processes	GO:0019693	ribose phosphate metabolic process	-17.0883	-14.7206	51/594	114,204,215,230,506,513,514,517,518,1337,1345,1347,1351,2821,4508,4513,4514,4536,4694,4695,4698,4705,4706,4708,4713,4714,4715,4722,4723,4724,4729,5160,5563,6319,7371,9377,9551,9631,10632,10891,23479,26330,51142,54205,55066,65990,79023,80025,120892,374291,790955	ADCY8,AK2,ABCD1,ALDOC,ATP5F1B,ATP5F1D,ATP5F1E,ATP5MC2,ATP5MC3,COX6A1,COX6C,COX7A2,COX8A,GPI,ATP6,COX2,COX3,ND2,NDUFA1,NDUFA2,NDUFA5,NDUFA10,NDUFAB1,NDUFB2,NDUFB7,NDUFB8,NDUFB9,NDUFS3,NDUFV1,NDUFS4,NDUFV2,PDHA1,PRKAA2,SCD,UCK2,COX5A,ATP5MF,NUP155,ATP5MG,PPARGC1A,ISCU,GAPDHS,CHCHD2,CYCS,PDPR,ANTKMT,NUP37,PANK2,LRRK2,NDUFS7,UQCC3
2_Member	KEGG Pathway	hsa05010	Alzheimer disease	-16.971	-14.6078	30/196	506,513,514,517,518,1337,1345,1347,1351,2904,4508,4513,4514,4694,4695,4698,4705,4706,4708,4713,4714,4715,4722,4723,4724,4729,5743,9377,54205,374291	ATP5F1B,ATP5F1D,ATP5F1E,ATP5MC2,ATP5MC3,COX6A1,COX6C,COX7A2,COX8A,GRIN2B,ATP6,COX2,COX3,NDUFA1,NDUFA2,NDUFA5,NDUFA10,NDUFAB1,NDUFB2,NDUFB7,NDUFB8,NDUFB9,NDUFS3,NDUFV1,NDUFS4,NDUFV2,PTGS2,COX5A,CYCS,NDUFS7
2_Member	GO Biological Processes	GO:0015980	energy derivation by oxidation of organic compounds	-16.9282	-14.5693	35/278	208,513,1337,1345,1351,2778,4191,4513,4514,4536,4694,4695,4698,4705,4706,4708,4713,4714,4715,4722,4723,4724,4729,5160,5290,9377,10891,23479,51142,54205,79751,80025,80219,374291,790955	AKT2,ATP5F1D,COX6A1,COX6C,COX8A,GNAS,MDH2,COX2,COX3,ND2,NDUFA1,NDUFA2,NDUFA5,NDUFA10,NDUFAB1,NDUFB2,NDUFB7,NDUFB8,NDUFB9,NDUFS3,NDUFV1,NDUFS4,NDUFV2,PDHA1,PIK3CA,COX5A,PPARGC1A,ISCU,CHCHD2,CYCS,SLC25A22,PANK2,COQ10B,NDUFS7,UQCC3
2_Member	GO Biological Processes	GO:0007005	mitochondrion organization	-16.3518	-13.9972	48/551	506,513,514,517,518,551,596,665,1347,2876,4508,4536,4694,4695,4698,4705,4706,4708,4713,4714,4715,4722,4723,4724,4729,7037,7417,9551,9804,10087,10245,10632,10891,10935,11337,11345,23130,23287,25793,26520,51142,54205,55210,80025,120892,374291,493753,790955	ATP5F1B,ATP5F1D,ATP5F1E,ATP5MC2,ATP5MC3,AVP,BCL2,BNIP3L,COX7A2,GPX1,ATP6,ND2,NDUFA1,NDUFA2,NDUFA5,NDUFA10,NDUFAB1,NDUFB2,NDUFB7,NDUFB8,NDUFB9,NDUFS3,NDUFV1,NDUFS4,NDUFV2,TFRC,VDAC2,ATP5MF,TOMM20,CERT1,TIMM17B,ATP5MG,PPARGC1A,PRDX3,GABARAP,GABARAPL2,ATG2A,AGTPBP1,FBXO7,TIMM9,CHCHD2,CYCS,ATAD3A,PANK2,LRRK2,NDUFS7,COA5,UQCC3
2_Member	GO Biological Processes	GO:0009117	nucleotide metabolic process	-15.9931	-13.6428	55/726	114,204,215,230,506,513,514,517,518,1337,1345,1347,1351,2821,2876,4191,4508,4513,4514,4536,4694,4695,4698,4705,4706,4708,4713,4714,4715,4722,4723,4724,4729,4860,5160,5563,5743,6319,7371,9377,9551,9631,10632,10891,23479,26330,51142,54205,55066,65990,79023,80025,120892,374291,790955	ADCY8,AK2,ABCD1,ALDOC,ATP5F1B,ATP5F1D,ATP5F1E,ATP5MC2,ATP5MC3,COX6A1,COX6C,COX7A2,COX8A,GPI,GPX1,MDH2,ATP6,COX2,COX3,ND2,NDUFA1,NDUFA2,NDUFA5,NDUFA10,NDUFAB1,NDUFB2,NDUFB7,NDUFB8,NDUFB9,NDUFS3,NDUFV1,NDUFS4,NDUFV2,PNP,PDHA1,PRKAA2,PTGS2,SCD,UCK2,COX5A,ATP5MF,NUP155,ATP5MG,PPARGC1A,ISCU,GAPDHS,CHCHD2,CYCS,PDPR,ANTKMT,NUP37,PANK2,LRRK2,NDUFS7,UQCC3
2_Member	GO Biological Processes	GO:0006753	nucleoside phosphate metabolic process	-15.761	-13.4149	55/735	114,204,215,230,506,513,514,517,518,1337,1345,1347,1351,2821,2876,4191,4508,4513,4514,4536,4694,4695,4698,4705,4706,4708,4713,4714,4715,4722,4723,4724,4729,4860,5160,5563,5743,6319,7371,9377,9551,9631,10632,10891,23479,26330,51142,54205,55066,65990,79023,80025,120892,374291,790955	ADCY8,AK2,ABCD1,ALDOC,ATP5F1B,ATP5F1D,ATP5F1E,ATP5MC2,ATP5MC3,COX6A1,COX6C,COX7A2,COX8A,GPI,GPX1,MDH2,ATP6,COX2,COX3,ND2,NDUFA1,NDUFA2,NDUFA5,NDUFA10,NDUFAB1,NDUFB2,NDUFB7,NDUFB8,NDUFB9,NDUFS3,NDUFV1,NDUFS4,NDUFV2,PNP,PDHA1,PRKAA2,PTGS2,SCD,UCK2,COX5A,ATP5MF,NUP155,ATP5MG,PPARGC1A,ISCU,GAPDHS,CHCHD2,CYCS,PDPR,ANTKMT,NUP37,PANK2,LRRK2,NDUFS7,UQCC3
2_Member	GO Biological Processes	GO:0055114	oxidation-reduction process	-15.4968	-13.1549	45/512	208,215,230,513,1337,1345,1347,1351,2778,2821,2876,3032,4191,4513,4514,4536,4694,4695,4698,4705,4706,4708,4713,4714,4715,4722,4723,4724,4729,5160,5290,9377,10891,10935,23479,26330,27294,51142,54205,79689,79751,80025,80219,374291,790955	AKT2,ABCD1,ALDOC,ATP5F1D,COX6A1,COX6C,COX7A2,COX8A,GNAS,GPI,GPX1,HADHB,MDH2,COX2,COX3,ND2,NDUFA1,NDUFA2,NDUFA5,NDUFA10,NDUFAB1,NDUFB2,NDUFB7,NDUFB8,NDUFB9,NDUFS3,NDUFV1,NDUFS4,NDUFV2,PDHA1,PIK3CA,COX5A,PPARGC1A,PRDX3,ISCU,GAPDHS,DHDH,CHCHD2,CYCS,STEAP4,SLC25A22,PANK2,COQ10B,NDUFS7,UQCC3
2_Member	KEGG Pathway	ko04932	Non-alcoholic fatty liver disease (NAFLD)	-15.2054	-12.8677	25/149	208,1337,1345,1347,1351,4513,4514,4694,4695,4698,4705,4706,4708,4713,4714,4715,4722,4723,4724,4729,5290,5563,9377,54205,374291	AKT2,COX6A1,COX6C,COX7A2,COX8A,COX2,COX3,NDUFA1,NDUFA2,NDUFA5,NDUFA10,NDUFAB1,NDUFB2,NDUFB7,NDUFB8,NDUFB9,NDUFS3,NDUFV1,NDUFS4,NDUFV2,PIK3CA,PRKAA2,COX5A,CYCS,NDUFS7
2_Member	KEGG Pathway	hsa04932	Non-alcoholic fatty liver disease	-14.8421	-12.5085	26/169	208,1337,1345,1347,1351,4513,4514,4694,4695,4698,4705,4706,4708,4713,4714,4715,4722,4723,4724,4729,5290,5563,5743,9377,54205,374291	AKT2,COX6A1,COX6C,COX7A2,COX8A,COX2,COX3,NDUFA1,NDUFA2,NDUFA5,NDUFA10,NDUFAB1,NDUFB2,NDUFB7,NDUFB8,NDUFB9,NDUFS3,NDUFV1,NDUFS4,NDUFV2,PIK3CA,PRKAA2,PTGS2,COX5A,CYCS,NDUFS7
2_Member	WikiPathways	WP4396	Nonalcoholic fatty liver disease	-14.7887	-12.4591	25/155	208,1337,1345,1347,1351,4513,4514,4694,4695,4698,4705,4706,4708,4713,4714,4715,4722,4723,4724,4729,5290,5563,9377,54205,374291	AKT2,COX6A1,COX6C,COX7A2,COX8A,COX2,COX3,NDUFA1,NDUFA2,NDUFA5,NDUFA10,NDUFAB1,NDUFB2,NDUFB7,NDUFB8,NDUFB9,NDUFS3,NDUFV1,NDUFS4,NDUFV2,PIK3CA,PRKAA2,COX5A,CYCS,NDUFS7
2_Member	CORUM	CORUM:178	Respiratory chain complex I (holoenzyme), mitochondrial	-14.2532	-11.9278	15/44	4536,4694,4695,4698,4705,4706,4708,4713,4714,4715,4722,4723,4724,4729,374291	ND2,NDUFA1,NDUFA2,NDUFA5,NDUFA10,NDUFAB1,NDUFB2,NDUFB7,NDUFB8,NDUFB9,NDUFS3,NDUFV1,NDUFS4,NDUFV2,NDUFS7
2_Member	GO Biological Processes	GO:0006120	mitochondrial electron transport, NADH to ubiquinone	-13.9221	-11.6006	16/55	4536,4694,4695,4698,4705,4706,4708,4713,4714,4715,4722,4723,4724,4729,23479,374291	ND2,NDUFA1,NDUFA2,NDUFA5,NDUFA10,NDUFAB1,NDUFB2,NDUFB7,NDUFB8,NDUFB9,NDUFS3,NDUFV1,NDUFS4,NDUFV2,ISCU,NDUFS7
2_Member	Reactome Gene Sets	R-HSA-6799198	Complex I biogenesis	-12.6298	-10.3162	15/55	4536,4694,4695,4698,4705,4706,4708,4713,4714,4715,4722,4723,4724,4729,374291	ND2,NDUFA1,NDUFA2,NDUFA5,NDUFA10,NDUFAB1,NDUFB2,NDUFB7,NDUFB8,NDUFB9,NDUFS3,NDUFV1,NDUFS4,NDUFV2,NDUFS7
2_Member	KEGG Pathway	hsa04723	Retrograde endocannabinoid signaling	-12.155	-9.84535	23/167	114,2569,2787,2788,2911,4536,4694,4695,4698,4705,4706,4708,4713,4714,4715,4722,4723,4724,4729,5743,10625,221955,374291	ADCY8,GABRR1,GNG5,GNG7,GRM1,ND2,NDUFA1,NDUFA2,NDUFA5,NDUFA10,NDUFAB1,NDUFB2,NDUFB7,NDUFB8,NDUFB9,NDUFS3,NDUFV1,NDUFS4,NDUFV2,PTGS2,IVNS1ABP,DAGLB,NDUFS7
2_Member	GO Biological Processes	GO:0010257	NADH dehydrogenase complex assembly	-11.4709	-9.17268	15/65	4536,4694,4695,4698,4705,4706,4708,4713,4714,4715,4722,4723,4724,4729,374291	ND2,NDUFA1,NDUFA2,NDUFA5,NDUFA10,NDUFAB1,NDUFB2,NDUFB7,NDUFB8,NDUFB9,NDUFS3,NDUFV1,NDUFS4,NDUFV2,NDUFS7
2_Member	GO Biological Processes	GO:0032981	mitochondrial respiratory chain complex I assembly	-11.4709	-9.17268	15/65	4536,4694,4695,4698,4705,4706,4708,4713,4714,4715,4722,4723,4724,4729,374291	ND2,NDUFA1,NDUFA2,NDUFA5,NDUFA10,NDUFAB1,NDUFB2,NDUFB7,NDUFB8,NDUFB9,NDUFS3,NDUFV1,NDUFS4,NDUFV2,NDUFS7
2_Member	WikiPathways	WP4324	Mitochondrial complex I assembly model OXPHOS system	-11.2601	-8.96561	14/56	4536,4694,4695,4698,4705,4706,4708,4713,4714,4715,4722,4723,4724,4729	ND2,NDUFA1,NDUFA2,NDUFA5,NDUFA10,NDUFAB1,NDUFB2,NDUFB7,NDUFB8,NDUFB9,NDUFS3,NDUFV1,NDUFS4,NDUFV2
2_Member	GO Biological Processes	GO:0033108	mitochondrial respiratory chain complex assembly	-10.5636	-8.27286	17/101	4536,4694,4695,4698,4705,4706,4708,4713,4714,4715,4722,4723,4724,4729,374291,493753,790955	ND2,NDUFA1,NDUFA2,NDUFA5,NDUFA10,NDUFAB1,NDUFB2,NDUFB7,NDUFB8,NDUFB9,NDUFS3,NDUFV1,NDUFS4,NDUFV2,NDUFS7,COA5,UQCC3
3_Summary	GO Biological Processes	GO:1902600	proton transmembrane transport	-11.8085	-9.50266	22/157	506,513,514,517,518,528,1337,1345,1347,1351,4508,4513,4514,5250,9377,9551,10632,51606,57282,65990,155066,374291,483,2185,3739,3748,6546,6583,6833,7402,23412,23416,54800,84286,283652,114,204,230,2821,5160,5563,6319,7371,9631,10891,26330,55066,79023,80025,790955,25,2280,2904,3358,6366,10369,23479,51312,93380,4860,1460,5290,5743,8395,8526,10809,23396,27010,30849,80339,83394,9804,10245,26520,79751,58…	ATP5F1B,ATP5F1D,ATP5F1E,ATP5MC2,ATP5MC3,ATP6V1C1,COX6A1,COX6C,COX7A2,COX8A,ATP6,COX2,COX3,SLC25A3,COX5A,ATP5MF,ATP5MG,ATP6V1H,SLC4A10,ANTKMT,ATP6V0E2,NDUFS7,ATP1B3,PTK2B,KCNA4,KCNC3,SLC8A1,SLC22A4,ABCC8,UTRN,COMMD3,KCNH3,KLHL24,TMEM175,SLC24A5,ADCY8,AK2,ALDOC,GPI,PDHA1,PRKAA2,SCD,UCK2,NUP155,PPARGC1A,GAPDHS,PDPR,NUP37,PANK2,UQCC3,ABL1,FKBP1A,GRIN2B,HTR2C,CCL21,CACNG2,ISCU,SLC25A37,MMGT1,PNP,CSNK2…
3_Member	GO Biological Processes	GO:1902600	proton transmembrane transport	-11.8085	-9.50266	22/157	506,513,514,517,518,528,1337,1345,1347,1351,4508,4513,4514,5250,9377,9551,10632,51606,57282,65990,155066,374291	ATP5F1B,ATP5F1D,ATP5F1E,ATP5MC2,ATP5MC3,ATP6V1C1,COX6A1,COX6C,COX7A2,COX8A,ATP6,COX2,COX3,SLC25A3,COX5A,ATP5MF,ATP5MG,ATP6V1H,SLC4A10,ANTKMT,ATP6V0E2,NDUFS7
3_Member	GO Biological Processes	GO:0042776	mitochondrial ATP synthesis coupled proton transport	-9.61253	-7.32551	9/22	506,513,514,517,518,4508,9551,10632,65990	ATP5F1B,ATP5F1D,ATP5F1E,ATP5MC2,ATP5MC3,ATP6,ATP5MF,ATP5MG,ANTKMT
3_Member	Reactome Gene Sets	R-HSA-163210	Formation of ATP by chemiosmotic coupling	-8.95092	-6.6748	8/18	506,513,514,517,518,4508,9551,10632	ATP5F1B,ATP5F1D,ATP5F1E,ATP5MC2,ATP5MC3,ATP6,ATP5MF,ATP5MG
3_Member	GO Biological Processes	GO:0015985	energy coupled proton transport, down electrochemical gradient	-8.67825	-6.41277	9/27	506,513,514,517,518,4508,9551,10632,65990	ATP5F1B,ATP5F1D,ATP5F1E,ATP5MC2,ATP5MC3,ATP6,ATP5MF,ATP5MG,ANTKMT
3_Member	GO Biological Processes	GO:0015986	ATP synthesis coupled proton transport	-8.67825	-6.41277	9/27	506,513,514,517,518,4508,9551,10632,65990	ATP5F1B,ATP5F1D,ATP5F1E,ATP5MC2,ATP5MC3,ATP6,ATP5MF,ATP5MG,ANTKMT
3_Member	GO Biological Processes	GO:0015672	monovalent inorganic cation transport	-8.59226	-6.33026	35/537	483,506,513,514,517,518,528,1337,1345,1347,1351,2185,3739,3748,4508,4513,4514,5250,6546,6583,6833,7402,9377,9551,10632,23412,23416,51606,54800,57282,65990,84286,155066,283652,374291	ATP1B3,ATP5F1B,ATP5F1D,ATP5F1E,ATP5MC2,ATP5MC3,ATP6V1C1,COX6A1,COX6C,COX7A2,COX8A,PTK2B,KCNA4,KCNC3,ATP6,COX2,COX3,SLC25A3,SLC8A1,SLC22A4,ABCC8,UTRN,COX5A,ATP5MF,ATP5MG,COMMD3,KCNH3,ATP6V1H,KLHL24,SLC4A10,ANTKMT,TMEM175,ATP6V0E2,SLC24A5,NDUFS7
3_Member	GO Biological Processes	GO:0009260	ribonucleotide biosynthetic process	-8.53058	-6.27548	25/295	114,204,230,506,513,514,517,518,2821,4508,4513,5160,5563,6319,7371,9551,9631,10632,10891,26330,55066,65990,79023,80025,790955	ADCY8,AK2,ALDOC,ATP5F1B,ATP5F1D,ATP5F1E,ATP5MC2,ATP5MC3,GPI,ATP6,COX2,PDHA1,PRKAA2,SCD,UCK2,ATP5MF,NUP155,ATP5MG,PPARGC1A,GAPDHS,PDPR,ANTKMT,NUP37,PANK2,UQCC3
3_Member	GO Biological Processes	GO:0046390	ribose phosphate biosynthetic process	-8.32327	-6.07157	25/302	114,204,230,506,513,514,517,518,2821,4508,4513,5160,5563,6319,7371,9551,9631,10632,10891,26330,55066,65990,79023,80025,790955	ADCY8,AK2,ALDOC,ATP5F1B,ATP5F1D,ATP5F1E,ATP5MC2,ATP5MC3,GPI,ATP6,COX2,PDHA1,PRKAA2,SCD,UCK2,ATP5MF,NUP155,ATP5MG,PPARGC1A,GAPDHS,PDPR,ANTKMT,NUP37,PANK2,UQCC3
3_Member	GO Biological Processes	GO:0009152	purine ribonucleotide biosynthetic process	-8.25048	-6.00217	24/282	114,204,230,506,513,514,517,518,2821,4508,4513,5160,5563,6319,9551,9631,10632,10891,26330,55066,65990,79023,80025,790955	ADCY8,AK2,ALDOC,ATP5F1B,ATP5F1D,ATP5F1E,ATP5MC2,ATP5MC3,GPI,ATP6,COX2,PDHA1,PRKAA2,SCD,ATP5MF,NUP155,ATP5MG,PPARGC1A,GAPDHS,PDPR,ANTKMT,NUP37,PANK2,UQCC3
3_Member	GO Biological Processes	GO:0009201	ribonucleoside triphosphate biosynthetic process	-8.16731	-5.92235	19/180	230,506,513,514,517,518,2821,4508,4513,5563,7371,9551,9631,10632,10891,26330,65990,79023,790955	ALDOC,ATP5F1B,ATP5F1D,ATP5F1E,ATP5MC2,ATP5MC3,GPI,ATP6,COX2,PRKAA2,UCK2,ATP5MF,NUP155,ATP5MG,PPARGC1A,GAPDHS,ANTKMT,NUP37,UQCC3
3_Member	GO Biological Processes	GO:0009156	ribonucleoside monophosphate biosynthetic process	-8.15671	-5.91508	20/200	204,230,506,513,514,517,518,2821,4508,4513,5563,7371,9551,9631,10632,10891,26330,65990,79023,790955	AK2,ALDOC,ATP5F1B,ATP5F1D,ATP5F1E,ATP5MC2,ATP5MC3,GPI,ATP6,COX2,PRKAA2,UCK2,ATP5MF,NUP155,ATP5MG,PPARGC1A,GAPDHS,ANTKMT,NUP37,UQCC3
3_Member	GO Biological Processes	GO:0098662	inorganic cation transmembrane transport	-8.11074	-5.87241	42/757	25,483,506,513,514,517,518,528,1337,1345,1347,1351,2185,2280,2904,3358,3739,3748,4508,4513,4514,5250,6366,6546,6833,7402,9377,9551,10369,10632,23416,23479,51312,51606,54800,57282,65990,84286,93380,155066,283652,374291	ABL1,ATP1B3,ATP5F1B,ATP5F1D,ATP5F1E,ATP5MC2,ATP5MC3,ATP6V1C1,COX6A1,COX6C,COX7A2,COX8A,PTK2B,FKBP1A,GRIN2B,HTR2C,KCNA4,KCNC3,ATP6,COX2,COX3,SLC25A3,CCL21,SLC8A1,ABCC8,UTRN,COX5A,ATP5MF,CACNG2,ATP5MG,KCNH3,ISCU,SLC25A37,ATP6V1H,KLHL24,SLC4A10,ANTKMT,TMEM175,MMGT1,ATP6V0E2,SLC24A5,NDUFS7
3_Member	GO Biological Processes	GO:0006754	ATP biosynthetic process	-8.08091	-5.84585	18/163	230,506,513,514,517,518,2821,4508,4513,5563,9551,9631,10632,10891,26330,65990,79023,790955	ALDOC,ATP5F1B,ATP5F1D,ATP5F1E,ATP5MC2,ATP5MC3,GPI,ATP6,COX2,PRKAA2,ATP5MF,NUP155,ATP5MG,PPARGC1A,GAPDHS,ANTKMT,NUP37,UQCC3
3_Member	GO Biological Processes	GO:0072522	purine-containing compound biosynthetic process	-7.95485	-5.72628	25/315	114,204,230,506,513,514,517,518,2821,4508,4513,4860,5160,5563,6319,9551,9631,10632,10891,26330,55066,65990,79023,80025,790955	ADCY8,AK2,ALDOC,ATP5F1B,ATP5F1D,ATP5F1E,ATP5MC2,ATP5MC3,GPI,ATP6,COX2,PNP,PDHA1,PRKAA2,SCD,ATP5MF,NUP155,ATP5MG,PPARGC1A,GAPDHS,PDPR,ANTKMT,NUP37,PANK2,UQCC3
3_Member	GO Biological Processes	GO:0009168	purine ribonucleoside monophosphate biosynthetic process	-7.89379	-5.67476	19/187	204,230,506,513,514,517,518,2821,4508,4513,5563,9551,9631,10632,10891,26330,65990,79023,790955	AK2,ALDOC,ATP5F1B,ATP5F1D,ATP5F1E,ATP5MC2,ATP5MC3,GPI,ATP6,COX2,PRKAA2,ATP5MF,NUP155,ATP5MG,PPARGC1A,GAPDHS,ANTKMT,NUP37,UQCC3
3_Member	GO Biological Processes	GO:0009124	nucleoside monophosphate biosynthetic process	-7.86529	-5.6494	20/208	204,230,506,513,514,517,518,2821,4508,4513,5563,7371,9551,9631,10632,10891,26330,65990,79023,790955	AK2,ALDOC,ATP5F1B,ATP5F1D,ATP5F1E,ATP5MC2,ATP5MC3,GPI,ATP6,COX2,PRKAA2,UCK2,ATP5MF,NUP155,ATP5MG,PPARGC1A,GAPDHS,ANTKMT,NUP37,UQCC3
3_Member	GO Biological Processes	GO:0009127	purine nucleoside monophosphate biosynthetic process	-7.85578	-5.64301	19/188	204,230,506,513,514,517,518,2821,4508,4513,5563,9551,9631,10632,10891,26330,65990,79023,790955	AK2,ALDOC,ATP5F1B,ATP5F1D,ATP5F1E,ATP5MC2,ATP5MC3,GPI,ATP6,COX2,PRKAA2,ATP5MF,NUP155,ATP5MG,PPARGC1A,GAPDHS,ANTKMT,NUP37,UQCC3
3_Member	GO Biological Processes	GO:0009142	nucleoside triphosphate biosynthetic process	-7.7433	-5.53668	19/191	230,506,513,514,517,518,2821,4508,4513,5563,7371,9551,9631,10632,10891,26330,65990,79023,790955	ALDOC,ATP5F1B,ATP5F1D,ATP5F1E,ATP5MC2,ATP5MC3,GPI,ATP6,COX2,PRKAA2,UCK2,ATP5MF,NUP155,ATP5MG,PPARGC1A,GAPDHS,ANTKMT,NUP37,UQCC3
3_Member	GO Biological Processes	GO:0090407	organophosphate biosynthetic process	-7.73446	-5.53089	39/693	114,204,230,506,513,514,517,518,1460,2185,2821,3358,4508,4513,4860,5160,5290,5563,5743,6319,7371,8395,8526,9551,9631,10632,10809,10891,23396,26330,27010,30849,55066,65990,79023,80025,80339,83394,790955	ADCY8,AK2,ALDOC,ATP5F1B,ATP5F1D,ATP5F1E,ATP5MC2,ATP5MC3,CSNK2B,PTK2B,GPI,HTR2C,ATP6,COX2,PNP,PDHA1,PIK3CA,PRKAA2,PTGS2,SCD,UCK2,PIP5K1B,DGKE,ATP5MF,NUP155,ATP5MG,STARD10,PPARGC1A,PIP5K1C,GAPDHS,TPK1,PIK3R4,PDPR,ANTKMT,NUP37,PANK2,PNPLA3,PITPNM3,UQCC3
3_Member	GO Biological Processes	GO:1990542	mitochondrial transmembrane transport	-7.66457	-5.46703	15/118	506,513,514,517,518,4508,5563,9551,9804,10245,10632,26520,51312,65990,79751	ATP5F1B,ATP5F1D,ATP5F1E,ATP5MC2,ATP5MC3,ATP6,PRKAA2,ATP5MF,TOMM20,TIMM17B,ATP5MG,TIMM9,SLC25A37,ANTKMT,SLC25A22
3_Member	GO Biological Processes	GO:0009206	purine ribonucleoside triphosphate biosynthetic process	-7.63347	-5.43891	18/174	230,506,513,514,517,518,2821,4508,4513,5563,9551,9631,10632,10891,26330,65990,79023,790955	ALDOC,ATP5F1B,ATP5F1D,ATP5F1E,ATP5MC2,ATP5MC3,GPI,ATP6,COX2,PRKAA2,ATP5MF,NUP155,ATP5MG,PPARGC1A,GAPDHS,ANTKMT,NUP37,UQCC3
3_Member	GO Biological Processes	GO:0006164	purine nucleotide biosynthetic process	-7.61761	-5.42602	24/304	114,204,230,506,513,514,517,518,2821,4508,4513,5160,5563,6319,9551,9631,10632,10891,26330,55066,65990,79023,80025,790955	ADCY8,AK2,ALDOC,ATP5F1B,ATP5F1D,ATP5F1E,ATP5MC2,ATP5MC3,GPI,ATP6,COX2,PDHA1,PRKAA2,SCD,ATP5MF,NUP155,ATP5MG,PPARGC1A,GAPDHS,PDPR,ANTKMT,NUP37,PANK2,UQCC3
3_Member	GO Biological Processes	GO:0009145	purine nucleoside triphosphate biosynthetic process	-7.59458	-5.40594	18/175	230,506,513,514,517,518,2821,4508,4513,5563,9551,9631,10632,10891,26330,65990,79023,790955	ALDOC,ATP5F1B,ATP5F1D,ATP5F1E,ATP5MC2,ATP5MC3,GPI,ATP6,COX2,PRKAA2,ATP5MF,NUP155,ATP5MG,PPARGC1A,GAPDHS,ANTKMT,NUP37,UQCC3
3_Member	GO Biological Processes	GO:0042407	cristae formation	-7.56402	-5.38033	9/35	506,513,514,517,518,4508,9551,10632,790955	ATP5F1B,ATP5F1D,ATP5F1E,ATP5MC2,ATP5MC3,ATP6,ATP5MF,ATP5MG,UQCC3
3_Member	GO Biological Processes	GO:0009165	nucleotide biosynthetic process	-7.43203	-5.26346	27/384	114,204,230,506,513,514,517,518,2821,4508,4513,4860,5160,5563,5743,6319,7371,9551,9631,10632,10891,26330,55066,65990,79023,80025,790955	ADCY8,AK2,ALDOC,ATP5F1B,ATP5F1D,ATP5F1E,ATP5MC2,ATP5MC3,GPI,ATP6,COX2,PNP,PDHA1,PRKAA2,PTGS2,SCD,UCK2,ATP5MF,NUP155,ATP5MG,PPARGC1A,GAPDHS,PDPR,ANTKMT,NUP37,PANK2,UQCC3
3_Member	GO Biological Processes	GO:1901293	nucleoside phosphate biosynthetic process	-7.36248	-5.1967	27/387	114,204,230,506,513,514,517,518,2821,4508,4513,4860,5160,5563,5743,6319,7371,9551,9631,10632,10891,26330,55066,65990,79023,80025,790955	ADCY8,AK2,ALDOC,ATP5F1B,ATP5F1D,ATP5F1E,ATP5MC2,ATP5MC3,GPI,ATP6,COX2,PNP,PDHA1,PRKAA2,PTGS2,SCD,UCK2,ATP5MF,NUP155,ATP5MG,PPARGC1A,GAPDHS,PDPR,ANTKMT,NUP37,PANK2,UQCC3
3_Member	Reactome Gene Sets	R-HSA-1852241	Organelle biogenesis and maintenance	-7.19991	-5.03966	23/296	506,513,514,517,518,585,4508,5347,5518,5563,7277,7846,9551,10575,10632,10891,11116,23322,54205,64784,84790,85441,91147	ATP5F1B,ATP5F1D,ATP5F1E,ATP5MC2,ATP5MC3,BBS4,ATP6,PLK1,PPP2R1A,PRKAA2,TUBA4A,TUBA1A,ATP5MF,CCT4,ATP5MG,PPARGC1A,CEP43,RPGRIP1L,CYCS,CRTC3,TUBA1C,HELZ2,TMEM67
3_Member	Reactome Gene Sets	R-HSA-1592230	Mitochondrial biogenesis	-7.10987	-4.95779	13/95	506,513,514,517,518,4508,5563,9551,10632,10891,54205,64784,85441	ATP5F1B,ATP5F1D,ATP5F1E,ATP5MC2,ATP5MC3,ATP6,PRKAA2,ATP5MF,ATP5MG,PPARGC1A,CYCS,CRTC3,HELZ2
3_Member	Reactome Gene Sets	R-HSA-8949613	Cristae formation	-6.79745	-4.66126	8/31	506,513,514,517,518,4508,9551,10632	ATP5F1B,ATP5F1D,ATP5F1E,ATP5MC2,ATP5MC3,ATP6,ATP5MF,ATP5MG
3_Member	GO Biological Processes	GO:0007007	inner mitochondrial membrane organization	-6.71686	-4.58326	10/56	506,513,514,517,518,4508,9551,10632,26520,790955	ATP5F1B,ATP5F1D,ATP5F1E,ATP5MC2,ATP5MC3,ATP6,ATP5MF,ATP5MG,TIMM9,UQCC3
3_Member	CORUM	CORUM:563	F1F0-ATP synthase, mitochondrial	-6.30314	-4.18479	6/16	506,513,514,4508,9551,10632	ATP5F1B,ATP5F1D,ATP5F1E,ATP6,ATP5MF,ATP5MG
3_Member	GO Biological Processes	GO:0006839	mitochondrial transport	-5.9903	-3.88908	20/271	506,513,514,517,518,596,665,4508,5563,7417,9551,9804,10245,10632,25793,26520,51312,65990,79751,120892	ATP5F1B,ATP5F1D,ATP5F1E,ATP5MC2,ATP5MC3,BCL2,BNIP3L,ATP6,PRKAA2,VDAC2,ATP5MF,TOMM20,TIMM17B,ATP5MG,FBXO7,TIMM9,SLC25A37,ANTKMT,SLC25A22,LRRK2
3_Member	GO Biological Processes	GO:0007006	mitochondrial membrane organization	-5.02873	-3.01027	13/144	506,513,514,517,518,596,665,4508,7417,9551,10632,26520,790955	ATP5F1B,ATP5F1D,ATP5F1E,ATP5MC2,ATP5MC3,BCL2,BNIP3L,ATP6,VDAC2,ATP5MF,ATP5MG,TIMM9,UQCC3
3_Member	GO Biological Processes	GO:1901137	carbohydrate derivative biosynthetic process	-4.02061	-2.15025	33/783	114,204,230,506,513,514,517,518,596,746,2131,2530,2821,4508,4513,5160,5563,6319,6366,7371,8509,9334,9551,9631,10632,10891,26330,29929,55066,65990,79023,80025,790955	ADCY8,AK2,ALDOC,ATP5F1B,ATP5F1D,ATP5F1E,ATP5MC2,ATP5MC3,BCL2,TMEM258,EXT1,FUT8,GPI,ATP6,COX2,PDHA1,PRKAA2,SCD,CCL21,UCK2,NDST2,B4GALT5,ATP5MF,NUP155,ATP5MG,PPARGC1A,GAPDHS,ALG6,PDPR,ANTKMT,NUP37,PANK2,UQCC3
3_Member	WikiPathways	WP4932	7q11.23 copy number variation syndrome	-2.43022	-0.952127	7/96	506,513,514,517,518,4508,79720	ATP5F1B,ATP5F1D,ATP5F1E,ATP5MC2,ATP5MC3,ATP6,VPS37B
4_Summary	WikiPathways	WP3888	VEGFA-VEGFR2 Signaling Pathway	-9.18103	-6.9013	32/435	25,389,596,2078,2185,2876,3164,3265,3748,4189,4323,4860,5216,5290,5563,5584,5654,5743,5829,6129,6154,6155,6416,6546,6748,6921,8664,9709,10399,54205,57758,84790,208,506,708,1436,1956,2821,3480,3642,6223,6366,6667,6870,7048,7852,11116,79872,158747,79720,59,1460,1803,3397	ABL1,RHOC,BCL2,ERG,PTK2B,GPX1,NR4A1,HRAS,KCNC3,DNAJB9,MMP14,PNP,PFN1,PIK3CA,PRKAA2,PRKCI,HTRA1,PTGS2,PXN,RPL7,RPL26,RPL27,MAP2K4,SLC8A1,SSR4,ELOC,EIF3D,HERPUD1,RACK1,CYCS,SCUBE2,TUBA1C,AKT2,ATP5F1B,C1QBP,CSF1R,EGFR,GPI,IGF1R,INSM1,RPS19,CCL21,SP1,TACR3,TGFBR2,CXCR4,CEP43,CBLL1,MOSPD2,VPS37B,ACTA2,CSNK2B,DPP4,ID1
4_Member	WikiPathways	WP3888	VEGFA-VEGFR2 Signaling Pathway	-9.18103	-6.9013	32/435	25,389,596,2078,2185,2876,3164,3265,3748,4189,4323,4860,5216,5290,5563,5584,5654,5743,5829,6129,6154,6155,6416,6546,6748,6921,8664,9709,10399,54205,57758,84790	ABL1,RHOC,BCL2,ERG,PTK2B,GPX1,NR4A1,HRAS,KCNC3,DNAJB9,MMP14,PNP,PFN1,PIK3CA,PRKAA2,PRKCI,HTRA1,PTGS2,PXN,RPL7,RPL26,RPL27,MAP2K4,SLC8A1,SSR4,ELOC,EIF3D,HERPUD1,RACK1,CYCS,SCUBE2,TUBA1C
4_Member	GO Biological Processes	GO:0051272	positive regulation of cellular component movement	-3.87795	-2.04018	27/597	25,208,389,506,596,708,1436,1956,2185,2821,3265,3480,3642,4323,5216,5743,6223,6366,6546,6667,6870,7048,7852,10399,11116,79872,158747	ABL1,AKT2,RHOC,ATP5F1B,BCL2,C1QBP,CSF1R,EGFR,PTK2B,GPI,HRAS,IGF1R,INSM1,MMP14,PFN1,PTGS2,RPS19,CCL21,SLC8A1,SP1,TACR3,TGFBR2,CXCR4,RACK1,CEP43,CBLL1,MOSPD2
4_Member	GO Biological Processes	GO:0040017	positive regulation of locomotion	-3.76163	-1.95417	27/607	25,208,389,506,596,708,1436,1956,2185,2821,3265,3480,3642,4323,5216,5743,6366,6546,6667,6870,7048,7852,10399,11116,79720,79872,158747	ABL1,AKT2,RHOC,ATP5F1B,BCL2,C1QBP,CSF1R,EGFR,PTK2B,GPI,HRAS,IGF1R,INSM1,MMP14,PFN1,PTGS2,CCL21,SLC8A1,SP1,TACR3,TGFBR2,CXCR4,RACK1,CEP43,VPS37B,CBLL1,MOSPD2
4_Member	GO Biological Processes	GO:2000147	positive regulation of cell motility	-3.7077	-1.9205	26/579	25,208,389,506,596,708,1436,1956,2185,2821,3265,3480,3642,4323,5216,5743,6366,6546,6667,6870,7048,7852,10399,11116,79872,158747	ABL1,AKT2,RHOC,ATP5F1B,BCL2,C1QBP,CSF1R,EGFR,PTK2B,GPI,HRAS,IGF1R,INSM1,MMP14,PFN1,PTGS2,CCL21,SLC8A1,SP1,TACR3,TGFBR2,CXCR4,RACK1,CEP43,CBLL1,MOSPD2
4_Member	GO Biological Processes	GO:0030335	positive regulation of cell migration	-3.60775	-1.84213	25/555	25,208,389,506,596,708,1436,1956,2185,2821,3265,3480,3642,4323,5216,5743,6366,6546,6667,7048,7852,10399,11116,79872,158747	ABL1,AKT2,RHOC,ATP5F1B,BCL2,C1QBP,CSF1R,EGFR,PTK2B,GPI,HRAS,IGF1R,INSM1,MMP14,PFN1,PTGS2,CCL21,SLC8A1,SP1,TGFBR2,CXCR4,RACK1,CEP43,CBLL1,MOSPD2
4_Member	GO Biological Processes	GO:0090130	tissue migration	-2.38758	-0.926851	16/366	25,59,506,1460,1803,2185,2821,2876,3164,3397,5216,5290,5743,5829,6667,7048	ABL1,ACTA2,ATP5F1B,CSNK2B,DPP4,PTK2B,GPI,GPX1,NR4A1,ID1,PFN1,PIK3CA,PTGS2,PXN,SP1,TGFBR2
4_Member	GO Biological Processes	GO:0043542	endothelial cell migration	-2.26091	-0.8514	13/279	25,506,1460,1803,2185,2821,2876,3164,3397,5290,5743,5829,6667	ABL1,ATP5F1B,CSNK2B,DPP4,PTK2B,GPI,GPX1,NR4A1,ID1,PIK3CA,PTGS2,PXN,SP1
4_Member	GO Biological Processes	GO:0010631	epithelial cell migration	-2.10921	-0.750154	15/358	25,506,1460,1803,2185,2821,2876,3164,3397,5216,5290,5743,5829,6667,7048	ABL1,ATP5F1B,CSNK2B,DPP4,PTK2B,GPI,GPX1,NR4A1,ID1,PFN1,PIK3CA,PTGS2,PXN,SP1,TGFBR2
4_Member	GO Biological Processes	GO:0090132	epithelium migration	-2.0778	-0.727534	15/361	25,506,1460,1803,2185,2821,2876,3164,3397,5216,5290,5743,5829,6667,7048	ABL1,ATP5F1B,CSNK2B,DPP4,PTK2B,GPI,GPX1,NR4A1,ID1,PFN1,PIK3CA,PTGS2,PXN,SP1,TGFBR2
5_Summary	GO Biological Processes	GO:0006979	response to oxidative stress	-8.79363	-6.52109	32/451	25,215,337,596,1956,2185,2530,2876,4153,4257,4323,5052,5563,5743,5829,6188,6546,6667,9817,10202,10276,10365,10399,10891,10935,25793,25828,51142,54205,84919,94241,120892,114,551,1396,2904,6191,9349,23367,114548,1136,9429,51714,3397,7037,7852,53335,64127,513,5290,6620,10369	ABL1,ABCD1,APOA4,BCL2,EGFR,PTK2B,FUT8,GPX1,MBL2,MGST1,MMP14,PRDX1,PRKAA2,PTGS2,PXN,RPS3,SLC8A1,SP1,KEAP1,DHRS2,NET1,KLF2,RACK1,PPARGC1A,PRDX3,FBXO7,TXN2,CHCHD2,CYCS,PPP1R15B,TP53INP1,LRRK2,ADCY8,AVP,CRIP1,GRIN2B,RPS4X,RPL23,LARP1,NLRP3,CHRNA3,ABCG2,SELENOT,ID1,TFRC,CXCR4,BCL11A,NOD2,ATP5F1D,PIK3CA,SNCB,CACNG2
5_Member	GO Biological Processes	GO:0006979	response to oxidative stress	-8.79363	-6.52109	32/451	25,215,337,596,1956,2185,2530,2876,4153,4257,4323,5052,5563,5743,5829,6188,6546,6667,9817,10202,10276,10365,10399,10891,10935,25793,25828,51142,54205,84919,94241,120892	ABL1,ABCD1,APOA4,BCL2,EGFR,PTK2B,FUT8,GPX1,MBL2,MGST1,MMP14,PRDX1,PRKAA2,PTGS2,PXN,RPS3,SLC8A1,SP1,KEAP1,DHRS2,NET1,KLF2,RACK1,PPARGC1A,PRDX3,FBXO7,TXN2,CHCHD2,CYCS,PPP1R15B,TP53INP1,LRRK2
5_Member	GO Biological Processes	GO:0034599	cellular response to oxidative stress	-7.56314	-5.38033	24/306	25,215,337,596,1956,2530,2876,4257,5052,5563,5829,6188,9817,10202,10276,10365,10399,10891,10935,25793,51142,54205,94241,120892	ABL1,ABCD1,APOA4,BCL2,EGFR,FUT8,GPX1,MGST1,PRDX1,PRKAA2,PXN,RPS3,KEAP1,DHRS2,NET1,KLF2,RACK1,PPARGC1A,PRDX3,FBXO7,CHCHD2,CYCS,TP53INP1,LRRK2
5_Member	GO Biological Processes	GO:0046677	response to antibiotic	-5.61613	-3.54053	21/312	25,114,551,596,1396,2185,2876,2904,6188,6191,6546,9349,10276,10365,10399,10935,23367,84919,94241,114548,120892	ABL1,ADCY8,AVP,BCL2,CRIP1,PTK2B,GPX1,GRIN2B,RPS3,RPS4X,SLC8A1,RPL23,NET1,KLF2,RACK1,PRDX3,LARP1,PPP1R15B,TP53INP1,NLRP3,LRRK2
5_Member	GO Biological Processes	GO:0000302	response to reactive oxygen species	-5.21837	-3.18375	17/229	25,337,596,1956,2185,2876,5052,5829,6188,6546,10276,10365,10399,10891,10935,84919,120892	ABL1,APOA4,BCL2,EGFR,PTK2B,GPX1,PRDX1,PXN,RPS3,SLC8A1,NET1,KLF2,RACK1,PPARGC1A,PRDX3,PPP1R15B,LRRK2
5_Member	GO Biological Processes	GO:0009636	response to toxic substance	-4.66134	-2.67535	26/506	25,337,551,596,1136,2185,2876,2904,4257,5052,5743,6188,6191,6546,9429,10202,10276,10365,10399,10891,10935,51714,84919,94241,114548,120892	ABL1,APOA4,AVP,BCL2,CHRNA3,PTK2B,GPX1,GRIN2B,MGST1,PRDX1,PTGS2,RPS3,RPS4X,SLC8A1,ABCG2,DHRS2,NET1,KLF2,RACK1,PPARGC1A,PRDX3,SELENOT,PPP1R15B,TP53INP1,NLRP3,LRRK2
5_Member	GO Biological Processes	GO:0042542	response to hydrogen peroxide	-4.6201	-2.63959	12/135	25,596,2185,2876,6188,6546,10276,10365,10399,10935,84919,120892	ABL1,BCL2,PTK2B,GPX1,RPS3,SLC8A1,NET1,KLF2,RACK1,PRDX3,PPP1R15B,LRRK2
5_Member	GO Biological Processes	GO:0097237	cellular response to toxic substance	-4.26717	-2.34443	16/245	25,337,2876,4257,5052,5743,6188,9429,10276,10365,10399,10891,10935,51714,94241,120892	ABL1,APOA4,GPX1,MGST1,PRDX1,PTGS2,RPS3,ABCG2,NET1,KLF2,RACK1,PPARGC1A,PRDX3,SELENOT,TP53INP1,LRRK2
5_Member	GO Biological Processes	GO:0035690	cellular response to drug	-3.85328	-2.02201	19/351	25,114,1136,1956,3397,5563,6188,6546,7037,7852,10276,10365,10399,10891,23367,53335,64127,94241,120892	ABL1,ADCY8,CHRNA3,EGFR,ID1,PRKAA2,RPS3,SLC8A1,TFRC,CXCR4,NET1,KLF2,RACK1,PPARGC1A,LARP1,BCL11A,NOD2,TP53INP1,LRRK2
5_Member	GO Biological Processes	GO:0071236	cellular response to antibiotic	-3.80055	-1.98072	11/140	25,114,1396,6188,9349,10276,10365,10399,23367,94241,120892	ABL1,ADCY8,CRIP1,RPS3,RPL23,NET1,KLF2,RACK1,LARP1,TP53INP1,LRRK2
5_Member	GO Biological Processes	GO:0034614	cellular response to reactive oxygen species	-3.23196	-1.54051	11/163	25,337,1956,5052,5829,6188,10276,10365,10399,10935,120892	ABL1,APOA4,EGFR,PRDX1,PXN,RPS3,NET1,KLF2,RACK1,PRDX3,LRRK2
5_Member	GO Biological Processes	GO:0010035	response to inorganic substance	-3.00447	-1.35822	23/543	25,114,337,513,596,1396,1956,2185,2876,5052,5290,5563,6188,6546,6620,10276,10365,10369,10399,10891,10935,84919,120892	ABL1,ADCY8,APOA4,ATP5F1D,BCL2,CRIP1,EGFR,PTK2B,GPX1,PRDX1,PIK3CA,PRKAA2,RPS3,SLC8A1,SNCB,NET1,KLF2,CACNG2,RACK1,PPARGC1A,PRDX3,PPP1R15B,LRRK2
6_Summary	GO Biological Processes	GO:0016236	macroautophagy	-8.57568	-6.31714	26/316	528,665,1460,5290,5563,5899,9559,9637,9804,10670,11337,11345,23130,23367,30849,51606,60592,64127,64771,79720,81876,94241,120892,140775,155066,100188893,25,596,1611,4210,9817,10891,25793,54472,585,1444,1956,3358,6223,6546,7048,7392,25828,53335,79726,819,6201,9349,26580,64784,6416,8795	ATP6V1C1,BNIP3L,CSNK2B,PIK3CA,PRKAA2,RALB,VPS26A,FEZ2,TOMM20,RRAGA,GABARAP,GABARAPL2,ATG2A,LARP1,PIK3R4,ATP6V1H,SCOC,NOD2,ILRUN,VPS37B,RAB1B,TP53INP1,LRRK2,SMCR8,ATP6V0E2,TOMM6,ABL1,BCL2,DAP,MEFV,KEAP1,PPARGC1A,FBXO7,TOLLIP,BBS4,CSHL1,EGFR,HTR2C,RPS19,SLC8A1,TGFBR2,USF2,TXN2,BCL11A,WDR59,CAMLG,RPS7,RPL23,BSCL2,CRTC3,MAP2K4,TNFRSF10B
6_Member	GO Biological Processes	GO:0016236	macroautophagy	-8.57568	-6.31714	26/316	528,665,1460,5290,5563,5899,9559,9637,9804,10670,11337,11345,23130,23367,30849,51606,60592,64127,64771,79720,81876,94241,120892,140775,155066,100188893	ATP6V1C1,BNIP3L,CSNK2B,PIK3CA,PRKAA2,RALB,VPS26A,FEZ2,TOMM20,RRAGA,GABARAP,GABARAPL2,ATG2A,LARP1,PIK3R4,ATP6V1H,SCOC,NOD2,ILRUN,VPS37B,RAB1B,TP53INP1,LRRK2,SMCR8,ATP6V0E2,TOMM6
6_Member	GO Biological Processes	GO:0006914	autophagy	-7.92923	-5.70704	34/543	25,528,596,665,1460,1611,4210,5290,5563,5899,9559,9637,9804,9817,10670,10891,11337,11345,23130,23367,25793,30849,51606,54472,60592,64127,64771,79720,81876,94241,120892,140775,155066,100188893	ABL1,ATP6V1C1,BCL2,BNIP3L,CSNK2B,DAP,MEFV,PIK3CA,PRKAA2,RALB,VPS26A,FEZ2,TOMM20,KEAP1,RRAGA,PPARGC1A,GABARAP,GABARAPL2,ATG2A,LARP1,FBXO7,PIK3R4,ATP6V1H,TOLLIP,SCOC,NOD2,ILRUN,VPS37B,RAB1B,TP53INP1,LRRK2,SMCR8,ATP6V0E2,TOMM6
6_Member	GO Biological Processes	GO:0061919	process utilizing autophagic mechanism	-7.92923	-5.70704	34/543	25,528,596,665,1460,1611,4210,5290,5563,5899,9559,9637,9804,9817,10670,10891,11337,11345,23130,23367,25793,30849,51606,54472,60592,64127,64771,79720,81876,94241,120892,140775,155066,100188893	ABL1,ATP6V1C1,BCL2,BNIP3L,CSNK2B,DAP,MEFV,PIK3CA,PRKAA2,RALB,VPS26A,FEZ2,TOMM20,KEAP1,RRAGA,PPARGC1A,GABARAP,GABARAPL2,ATG2A,LARP1,FBXO7,PIK3R4,ATP6V1H,TOLLIP,SCOC,NOD2,ILRUN,VPS37B,RAB1B,TP53INP1,LRRK2,SMCR8,ATP6V0E2,TOMM6
6_Member	GO Biological Processes	GO:0016241	regulation of macroautophagy	-6.0232	-3.91715	16/178	528,665,5290,5563,5899,9559,9637,10670,23367,51606,60592,64127,81876,120892,140775,155066	ATP6V1C1,BNIP3L,PIK3CA,PRKAA2,RALB,VPS26A,FEZ2,RRAGA,LARP1,ATP6V1H,SCOC,NOD2,RAB1B,LRRK2,SMCR8,ATP6V0E2
6_Member	GO Biological Processes	GO:0010506	regulation of autophagy	-5.99897	-3.89534	23/346	25,528,596,665,1611,4210,5290,5563,5899,9559,9637,9817,10670,23367,25793,51606,60592,64127,81876,94241,120892,140775,155066	ABL1,ATP6V1C1,BCL2,BNIP3L,DAP,MEFV,PIK3CA,PRKAA2,RALB,VPS26A,FEZ2,KEAP1,RRAGA,LARP1,FBXO7,ATP6V1H,SCOC,NOD2,RAB1B,TP53INP1,LRRK2,SMCR8,ATP6V0E2
6_Member	GO Biological Processes	GO:0010508	positive regulation of autophagy	-4.08851	-2.19656	11/130	665,4210,5563,5899,23367,25793,60592,64127,94241,120892,140775	BNIP3L,MEFV,PRKAA2,RALB,LARP1,FBXO7,SCOC,NOD2,TP53INP1,LRRK2,SMCR8
6_Member	GO Biological Processes	GO:0016239	positive regulation of macroautophagy	-3.34594	-1.63246	7/67	665,5563,5899,23367,60592,64127,140775	BNIP3L,PRKAA2,RALB,LARP1,SCOC,NOD2,SMCR8
6_Member	GO Biological Processes	GO:0009991	response to extracellular stimulus	-3.31422	-1.60659	23/515	585,596,1444,1611,1956,3358,5563,5899,6223,6546,7048,7392,10670,10891,11337,11345,23367,25828,30849,53335,64127,79726,120892	BBS4,BCL2,CSHL1,DAP,EGFR,HTR2C,PRKAA2,RALB,RPS19,SLC8A1,TGFBR2,USF2,RRAGA,PPARGC1A,GABARAP,GABARAPL2,LARP1,TXN2,PIK3R4,BCL11A,NOD2,WDR59,LRRK2
6_Member	GO Biological Processes	GO:0031667	response to nutrient levels	-3.22558	-1.536	22/490	585,596,1444,1611,1956,3358,5563,5899,6546,7048,7392,10670,10891,11337,11345,23367,25828,30849,53335,64127,79726,120892	BBS4,BCL2,CSHL1,DAP,EGFR,HTR2C,PRKAA2,RALB,SLC8A1,TGFBR2,USF2,RRAGA,PPARGC1A,GABARAP,GABARAPL2,LARP1,TXN2,PIK3R4,BCL11A,NOD2,WDR59,LRRK2
6_Member	GO Biological Processes	GO:0042594	response to starvation	-3.09721	-1.43641	12/196	596,1611,5563,5899,10670,10891,11337,11345,23367,30849,79726,120892	BCL2,DAP,PRKAA2,RALB,RRAGA,PPARGC1A,GABARAP,GABARAPL2,LARP1,PIK3R4,WDR59,LRRK2
6_Member	GO Biological Processes	GO:0009895	negative regulation of catabolic process	-2.92781	-1.29482	16/323	596,819,1611,1956,5290,6201,9349,9637,10670,10891,11345,23367,26580,64784,120892,140775	BCL2,CAMLG,DAP,EGFR,PIK3CA,RPS7,RPL23,FEZ2,RRAGA,PPARGC1A,GABARAPL2,LARP1,BSCL2,CRTC3,LRRK2,SMCR8
6_Member	GO Biological Processes	GO:0031669	cellular response to nutrient levels	-2.88519	-1.26268	13/236	596,1611,5563,5899,7392,10670,11337,11345,25828,30849,53335,79726,120892	BCL2,DAP,PRKAA2,RALB,USF2,RRAGA,GABARAP,GABARAPL2,TXN2,PIK3R4,BCL11A,WDR59,LRRK2
6_Member	GO Biological Processes	GO:0071496	cellular response to external stimulus	-2.85905	-1.246	16/328	596,1611,1956,5563,5899,6416,7392,8795,10670,11337,11345,25828,30849,53335,79726,120892	BCL2,DAP,EGFR,PRKAA2,RALB,MAP2K4,USF2,TNFRSF10B,RRAGA,GABARAP,GABARAPL2,TXN2,PIK3R4,BCL11A,WDR59,LRRK2
6_Member	GO Biological Processes	GO:0009267	cellular response to starvation	-2.79879	-1.20171	10/157	596,1611,5563,5899,10670,11337,11345,30849,79726,120892	BCL2,DAP,PRKAA2,RALB,RRAGA,GABARAP,GABARAPL2,PIK3R4,WDR59,LRRK2
6_Member	GO Biological Processes	GO:0010507	negative regulation of autophagy	-2.70022	-1.12664	7/86	596,1611,5290,9637,10670,120892,140775	BCL2,DAP,PIK3CA,FEZ2,RRAGA,LRRK2,SMCR8
6_Member	GO Biological Processes	GO:0031668	cellular response to extracellular stimulus	-2.51673	-0.997264	13/260	596,1611,5563,5899,7392,10670,11337,11345,25828,30849,53335,79726,120892	BCL2,DAP,PRKAA2,RALB,USF2,RRAGA,GABARAP,GABARAPL2,TXN2,PIK3R4,BCL11A,WDR59,LRRK2
6_Member	GO Biological Processes	GO:0031330	negative regulation of cellular catabolic process	-2.26091	-0.8514	13/279	596,819,1611,5290,6201,9349,9637,10670,10891,11345,23367,120892,140775	BCL2,CAMLG,DAP,PIK3CA,RPS7,RPL23,FEZ2,RRAGA,PPARGC1A,GABARAPL2,LARP1,LRRK2,SMCR8
7_Summary	GO Biological Processes	GO:0022613	ribonucleoprotein complex biogenesis	-8.0366	-5.8048	33/511	708,3646,5036,5563,6129,6130,6154,6155,6175,6193,6201,6203,6209,6218,6223,6227,6228,6232,6234,6632,6634,6635,8664,11157,22889,25804,51202,55164,55651,57819,64979,84864,404672,10927,3265,5464,6618,6667,7965,8812,79670,283989	C1QBP,EIF3E,PA2G4,PRKAA2,RPL7,RPL7A,RPL26,RPL27,RPLP0,RPS5,RPS7,RPS9,RPS15,RPS17,RPS19,RPS21,RPS23,RPS27,RPS28,SNRPD1,SNRPD3,SNRPE,EIF3D,LSM6,KHDC4,LSM4,DDX47,SHQ1,NHP2,LSM2,MRPL36,RIOX2,GTF2H5,SPIN1,HRAS,PPA1,SNAPC2,SP1,AIMP2,CCNK,TUT7,TSEN54
7_Member	GO Biological Processes	GO:0022613	ribonucleoprotein complex biogenesis	-8.0366	-5.8048	33/511	708,3646,5036,5563,6129,6130,6154,6155,6175,6193,6201,6203,6209,6218,6223,6227,6228,6232,6234,6632,6634,6635,8664,11157,22889,25804,51202,55164,55651,57819,64979,84864,404672	C1QBP,EIF3E,PA2G4,PRKAA2,RPL7,RPL7A,RPL26,RPL27,RPLP0,RPS5,RPS7,RPS9,RPS15,RPS17,RPS19,RPS21,RPS23,RPS27,RPS28,SNRPD1,SNRPD3,SNRPE,EIF3D,LSM6,KHDC4,LSM4,DDX47,SHQ1,NHP2,LSM2,MRPL36,RIOX2,GTF2H5
7_Member	GO Biological Processes	GO:0042254	ribosome biogenesis	-6.91264	-4.76858	23/307	708,5036,6129,6130,6154,6155,6175,6193,6201,6203,6209,6218,6223,6227,6232,6234,11157,51202,55164,55651,64979,84864,404672	C1QBP,PA2G4,RPL7,RPL7A,RPL26,RPL27,RPLP0,RPS5,RPS7,RPS9,RPS15,RPS17,RPS19,RPS21,RPS27,RPS28,LSM6,DDX47,SHQ1,NHP2,MRPL36,RIOX2,GTF2H5
7_Member	GO Biological Processes	GO:0006364	rRNA processing	-5.8694	-3.77531	18/228	5036,6129,6130,6154,6155,6201,6203,6209,6218,6223,6227,6232,6234,11157,51202,55164,55651,404672	PA2G4,RPL7,RPL7A,RPL26,RPL27,RPS7,RPS9,RPS15,RPS17,RPS19,RPS21,RPS27,RPS28,LSM6,DDX47,SHQ1,NHP2,GTF2H5
7_Member	GO Biological Processes	GO:0016072	rRNA metabolic process	-5.53693	-3.47469	19/265	5036,6129,6130,6154,6155,6201,6203,6209,6218,6223,6227,6232,6234,10927,11157,51202,55164,55651,404672	PA2G4,RPL7,RPL7A,RPL26,RPL27,RPS7,RPS9,RPS15,RPS17,RPS19,RPS21,RPS27,RPS28,SPIN1,LSM6,DDX47,SHQ1,NHP2,GTF2H5
7_Member	GO Biological Processes	GO:0042274	ribosomal small subunit biogenesis	-5.50191	-3.44835	10/75	6193,6201,6209,6218,6223,6227,6232,6234,11157,404672	RPS5,RPS7,RPS15,RPS17,RPS19,RPS21,RPS27,RPS28,LSM6,GTF2H5
7_Member	GO Biological Processes	GO:0022618	ribonucleoprotein complex assembly	-4.7173	-2.72761	18/276	708,3646,5563,6175,6193,6209,6223,6228,6232,6234,6632,6634,6635,8664,22889,25804,55164,57819	C1QBP,EIF3E,PRKAA2,RPLP0,RPS5,RPS15,RPS19,RPS23,RPS27,RPS28,SNRPD1,SNRPD3,SNRPE,EIF3D,KHDC4,LSM4,SHQ1,LSM2
7_Member	GO Biological Processes	GO:0071826	ribonucleoprotein complex subunit organization	-4.43328	-2.48599	18/290	708,3646,5563,6175,6193,6209,6223,6228,6232,6234,6632,6634,6635,8664,22889,25804,55164,57819	C1QBP,EIF3E,PRKAA2,RPLP0,RPS5,RPS15,RPS19,RPS23,RPS27,RPS28,SNRPD1,SNRPD3,SNRPE,EIF3D,KHDC4,LSM4,SHQ1,LSM2
7_Member	GO Biological Processes	GO:0000028	ribosomal small subunit assembly	-4.25027	-2.33384	5/21	6193,6209,6223,6232,6234	RPS5,RPS15,RPS19,RPS27,RPS28
7_Member	GO Biological Processes	GO:0034660	ncRNA metabolic process	-4.08361	-2.196	27/580	3265,5036,5464,6129,6130,6154,6155,6201,6203,6209,6218,6223,6227,6232,6234,6618,6667,7965,8812,10927,11157,51202,55164,55651,79670,283989,404672	HRAS,PA2G4,PPA1,RPL7,RPL7A,RPL26,RPL27,RPS7,RPS9,RPS15,RPS17,RPS19,RPS21,RPS27,RPS28,SNAPC2,SP1,AIMP2,CCNK,SPIN1,LSM6,DDX47,SHQ1,NHP2,TUT7,TSEN54,GTF2H5
[truncated: 146 more rows]

## Sheet: Annotations_MTZO_CBEO
MyList	Gene ID	Type	Tax ID	Homologene Gene ID	Homologene Gene Tax ID	Gene Symbol	Description	Biological Process (GO)	Kinase Class (UniProt)	Protein Function (Protein Atlas)	Subcellular Location (Protein Atlas)	Drug (DrugBank)	Canonical Pathways_x000D_	Hallmark Gene Sets_x000D_	ko05016 Huntington's disease	R-HSA-72766 Translation	GO:0006979 response to oxidative stress	GO:0045664 regulation of neuron different	GO:0098662 inorganic cation transmembrane	R-HSA-1852241 Organelle biogenesis and maint	GO:0016049 cell growth	GO:0051129 negative regulation of cellula	R-HSA-5628897 TP53 Regulates Metabolic Genes	GO:0031647 regulation of protein stabilit	GO:0021700 developmental maturation	GO:0042254 ribosome biogenesis	CORUM:2920 Respiratory chain complex I (l	GO:0007423 sensory organ development	WP3888 VEGFA-VEGFR2 Signaling Pathway	GO:0043009 chordate embryonic development	WP408 Oxidative Stress	GO:0045050 protein insertion into ER memb	GO:0010638 positive regulation of organel	GO:0002275 myeloid cell activation involv
[truncated: 497 more rows]

[truncated: 1 more sheets: Enrichment_MTZO_CBEO]
