# Supplementary material for: A zebrafish screen reveals Renin-angiotensin system inhibitors as neuroprotective via mitochondrial restoration in dopamine neurons
Source: eLife. 2021 Sep 22;10:e69795. doi: 10.7554/eLife.69795 (PMC8457844; doi:10.7554/eLife.69795)
Supplement: Figure 7—source data 1. [file elife-69795-fig7-data1.xlsx]

## Sheet: Sheet2
Figure 7 - source data 1
PPMI Data (deidentified)
Worksheet 1 - Deidentified patient data from PPMI Database

## Sheet: Sheet1
STATUS	PATNO	BIRTHDT	AGE	CURRENTAGE	AGEONSET	GENDER	DURATION	RACE	TIMETOLEVO (Days)	TIMETOLEVO_YR	SMOKING	CAFFEINE	ALCOHOL	HEAD	COHORT	HTN
1	3002	1943	67.5781	77	65.5205	1	12.9	1	306	0.838356	NA	NA	NA	NA	0	0
1	3003	1954	56.7178	66	51.8274	1	24.6	1	1402	3.8411	0	0	1	0	0	0
1	3010	1964	46.9657	56	45.9657	0	4.3667	1	976	2.67397	0	1	1	1	0	0
1	3012	1953	58.8192	67	55.5462	0	3.4	1	1338	3.66575	NA	NA	NA	NA	0	0
1	3018	1951	61.882	69	59.7288	1	2.9	1	267.7	0.733425	0	1	1	1	0	0
1	3020	1938	73.9636	82	70.3652	1	3.0333	1	548	1.50137	NA	NA	NA	NA	0	1
0	3021	1948	64.0738	72	63.5267	1	3.0333	1	178	0.487672	NA	NA	NA	NA	0	0
0	3023	1941	71.1138	79	68.2	1	9.2333	1	484.943	1.32861	NA	NA	NA	NA	0	0
0	3024	1959	52.7439	61	51.7151	0	4.6333	1	283.051	0.775483	NA	NA	NA	NA	0	0
1	3051	1939	71.6356	81	69.0214	0	7.5667	1	1368.57	3.74951	0	1	1	0	0	1
1	3052	1944	65.9506	76	64.7178	1	10.6333	1	547.993	1.50135	0	1	1	0	0	0
1	3054	1936	74.2238	84	70.6704	0	7	1	455.974	1.24924	1	1	1	0	0	0
1	3056	1955	55.663	65	54.6164	0	12.6667	1	1034	2.83288	NA	NA	NA	NA	0	0
1	3058	1931	79.8904	89	75.7863	0	4.8	1	394	1.07945	NA	NA	NA	NA	0	0
1	3060	1936	75.0225	84	73.4801	0	12.2	1	549	1.50411	1	1	1	0	0	0
1	3061	1957	53.2301	63	52.2082	1	4.4	1	1461	4.00274	NA	NA	NA	NA	0	0
1	3066	1947	63.8356	73	62.1918	1	3.7667	1	853	2.33699	NA	NA	NA	NA	0	0
1	3078	1951	60.6539	69	59.8767	0	3.7	1	1163.9	3.18876	0	1	1	0	0	0
1	3083	1947	65.6823	73	64.0219	1	5.5333	1	761	2.08493	0	1	NA	0	0	0
1	3086	1956	56.3695	64	54.2572	1	3.3667	1	1767	4.8411	NA	NA	NA	NA	0	0
1	3088	1958	55.2548	62	52.4301	1	10.2	1	426	1.16712	0	1	1	1	0	0
1	3089	1957	56.2603	63	55.2513	1	5.3333	1	851.881	2.33392	0	1	1	0	0	0
1	3107	1941	69.611	79	66.0356	0	3.0333	1	275	0.753425	NA	NA	NA	NA	0	0
1	3108	1961	49.7671	59	47.1734	1	1.4333	1	274.27	0.751425	0	1	0	0	0	0
1	3110	1948	62.8453	72	62.1741	0	1.4667	1	944.977	2.58898	1	1	0	0	0	0
1	3111	1946	64.6356	74	61.6072	0	0.9667	1	1280	3.50685	NA	NA	NA	NA	0	0
1	3118	1951	60.2793	69	59.6658	0	1.3667	1	366	1.00274	NA	NA	NA	NA	0	0
1	3119	1947	64.3585	73	62.2356	0	2.5	1	1308	3.58356	0	0	1	0	0	0
1	3120	1962	49.5086	58	47.8603	1	2.5667	1	1064.99	2.91779	0	1	1	0	0	0
1	3123	1943	69.344	77	69.0981	0	2.9667	1	699	1.91507	0	1	0	1	0	0
1	3124	1955	57.1906	65	56.3616	0	4	1	273	0.747945	NA	NA	NA	NA	0	0
1	3125	1966	46.0068	54	45.6051	0	1.8333	1	549	1.50411	NA	NA	NA	NA	0	0
1	3126	1948	64.2432	72	62.6968	0	6.8	1	395.96	1.08482	1	1	1	1	0	0
1	3127	1963	49.1296	57	48.3014	1	4	1	90.9993	0.249313	1	1	1	1	0	0
1	3128	1952	60.0137	68	58.8293	1	1.9333	2	1673	4.58356	0	1	0	0	0	0
1	3130	1969	43.8688	51	43.0328	0	2.4	1	181	0.49589	1	1	1	0	0	0
1	3132	1963	49.8767	57	48.7832	0	1.3	1	1158.98	3.1753	1	1	1	1	0	0
1	3134	1974	38.5479	46	38.0307	0	1.8667	1	395	1.08219	NA	NA	NA	NA	0	0
1	3150	1953	57.3781	67	53.9753	1	22.5667	1	1216	3.33151	NA	NA	NA	NA	0	0
1	3173	1949	62.2874	71	61.0767	1	11	1	1705	4.67123	1	0	1	0	0	0
1	3174	1961	50.4979	59	48.9233	0	4.3333	1	973.5	2.66712	0	0	1	0	0	0
1	3175	1955	57.2321	65	52.9725	1	10	1	2831	7.75616	0	1	1	0	0	0
0	3176	1950	61.5086	70	59.2	0	0.7	1	915.516	2.50826	0	0	1	1	0	0
1	3178	1940	71.8115	80	66.7772	0	11.5333	3	182.943	0.501213	NA	NA	NA	NA	0	1
1	3179	1961	51.4095	59	50.7342	0	3.8667	1	1095.37	3.001	0	1	1	1	0	0
0	3181	1944	67.9126	76	63.8798	1	9.8	1	510.96	1.39989	NA	NA	NA	NA	0	1
1	3184	1953	59.1345	67	58.517	1	3.5667	1	1369	3.75068	NA	NA	NA	NA	0	0
0	3185	1958	54.5644	62	51.3726	1	3.1667	1	298.983	0.819132	0	1	1	1	0	0
0	3186	1951	61.5479	69	61.2223	1	1.4	1	110.417	0.302514	NA	NA	NA	NA	0	1
1	3203	1954	56.7534	66	55.3589	0	9.1667	1	700	1.91781	NA	NA	NA	NA	0	1
1	3209	1943	68.1863	77	66.2384	0	19.8667	1	244.051	0.668632	NA	NA	NA	NA	0	0
1	3218	1947	63.9534	73	63.0329	0	5.0333	1	639	1.75068	0	1	1	1	0	0
1	3220	1938	73.4932	82	72.6164	1	2	1	731	2.00274	0	1	NA	1	0	0
1	3223	1945	66.4546	75	61.5123	0	13.7667	1	731	2.00274	1	1	1	1	0	0
1	3224	1927	84.884	93	83.0082	0	1.1333	1	213.861	0.585921	NA	NA	NA	NA	0	0
1	3227	1961	50.703	59	49.4301	1	2.9	1	1065	2.91781	NA	NA	NA	NA	0	0
1	3228	1945	67.0863	75	62.9716	0	10.8333	1	1248	3.41918	0	1	1	NA	0	1
1	3230	1942	69.8149	78	68.0575	0	8.1	1	122.757	0.336321	1	1	1	0	0	0
1	3231	1956	55.8142	64	53.2239	1	9.4	1	184	0.50411	1	1	1	0	0	0
1	3234	1943	69.7589	77	69.3839	0	4.6667	1	456	1.24932	NA	NA	NA	NA	0	1
1	3251	1951	59.2986	69	57.7233	1	2.3	1	180.983	0.495844	NA	NA	NA	NA	0	0
0	3252	1963	47.3945	57	44.7305	1	5.5333	1	164.417	0.450457	1	1	1	1	0	1
1	3268	1950	61.537	70	59.3041	0	3.2	1	1035	2.83562	NA	NA	NA	NA	0	1
0	3269	1950	60.8137	70	58.7534	1	4.1333	1	454.123	1.24417	0	1	1	NA	0	0
1	3275	1942	69.0356	78	68.2247	0	2.5333	1	547	1.49863	NA	NA	NA	NA	0	0
1	3278	1946	65.6932	74	63.8712	0	13.5667	1	1131.58	3.10023	0	1	1	1	0	0
1	3282	1950	62.1816	70	59.9014	1	6.1	1	240.613	0.659213	NA	NA	NA	NA	0	0
1	3284	1948	64.1885	72	59.103	1	12.9	1	607.997	1.66575	NA	NA	NA	NA	0	0
1	3285	1944	68.2596	76	56.0601	0	2.5333	1	327.843	0.8982	0	0	1	1	0	0
1	3308	1944	67.2511	76	63.6257	0	5.9667	1	2526	6.92055	0	1	1	1	0	0
1	3309	1957	54.0383	63	52.0466	1	8.9333	1	365.046	1.00013	1	1	0	0	0	0
1	3312	1934	78.0161	86	72.9479	0	9.2667	1	90	0.246575	NA	NA	NA	NA	0	0
1	3325	1946	66.5652	74	65.4055	1	6.6333	1	518.95	1.42178	NA	NA	NA	NA	0	0
0	3327	1958	54.3509	62	54.146	1	5.3	1	620.396	1.69971	0	1	1	1	0	0
1	3333	1946	66.7781	74	66.4822	0	1.9333	2	518	1.41918	NA	NA	NA	NA	0	0
1	3354	1942	69.126	78	66.8631	0	23.6667	1	214	0.586301	0	1	1	0	0	0
1	3360	1944	67.0172	76	66.6775	0	2.7333	1	1218	3.33699	NA	NA	NA	NA	0	0
1	3371	1943	68.6464	77	66.4575	0	24.4333	1	182.137	0.499006	NA	NA	NA	NA	0	0
1	3372	1940	71.3907	80	68.0137	0	3.7667	1	153.052	0.419321	0	0	1	0	0	0
1	3373	1951	60.8156	69	59.9726	0	3.5	1	153	0.419178	NA	NA	NA	NA	0	0
1	3374	1941	71.937	79	69.5808	0	5.1333	1	730.044	2.00012	NA	NA	NA	NA	0	1
1	3377	1958	53.7191	62	51.7288	1	6	1	608	1.66575	0	1	1	1	0	0
1	3378	1964	48.0328	56	44.9575	0	5.3333	1	152.987	0.419142	NA	NA	NA	NA	0	0
1	3380	1942	70.0942	78	68.5315	1	1.4667	1	91.999	0.252052	NA	NA	NA	NA	0	0
1	3383	1964	48.4454	56	37.2064	0	7.6	1	396	1.08493	0	1	1	1	0	0
1	3387	1956	56.3443	64	54.8539	1	5.3	1	334	0.915068	NA	NA	NA	NA	0	0
1	3392	1962	51.342	58	49.5798	1	6.4667	1	974	2.66849	NA	NA	NA	NA	0	0
1	3400	1971	39.1863	49	35.8521	1	9.0333	1	1370	3.75342	0	1	1	0	0	1
1	3406	1975	34.7726	45	32.6399	0	6.7667	1	2496	6.83836	NA	NA	NA	NA	0	0
1	3409	1947	63.5123	73	62.4329	0	1.7	1	1066	2.92055	0	1	0	NA	0	0
1	3415	1949	61.4356	71	59.7425	0	1.8333	1	884	2.42192	0	0	1	0	0	1
1	3417	1954	56.7096	66	55.5534	0	7.9667	1	2102	5.7589	NA	NA	NA	NA	0	0
1	3418	1956	54.8096	64	51.9426	0	8.9667	1	1736	4.75616	NA	NA	NA	NA	0	1
1	3422	1953	57.5397	67	55.9534	0	5.6	1	1430.05	3.91795	NA	NA	NA	NA	0	1
1	3423	1942	69.4274	78	66.2675	0	20.3	1	2557	7.00548	0	0	NA	0	0	0
1	3429	1946	65.4	74	60.4685	0	2.9667	1	1090.97	2.98895	NA	NA	NA	NA	0	1
1	3434	1957	53.7808	63	47.4548	0	2.1333	1	2253	6.1726	0	1	1	0	0	0
1	3436	1960	51.0025	60	49.8792	0	1.8	1	912	2.49863	0	0	1	1	0	0
1	3439	1954	57.1397	66	55.1507	0	13.2667	1	1705	4.67123	NA	NA	NA	NA	0	0
1	3445	1964	48.082	56	46.3949	0	3.1	1	2011.99	5.51231	1	0	1	1	0	1
0	3454	1953	57.2301	67	56	1	6.5667	1	286.813	0.785788	NA	NA	NA	NA	0	1
1	3470	1954	57.353	66	55.8137	0	8.1667	1	2342	6.41644	1	1	1	1	0	0
1	3472	1951	61.2508	69	60.0712	0	2.4667	1	1979	5.42192	NA	NA	NA	NA	0	1
1	3473	1957	55.3681	63	53.4137	1	2.7333	1	304	0.832877	1	1	1	1	0	0
0	3475	1964	48.2951	56	45.7408	0	5.1333	1	516.372	1.41472	0	1	1	NA	0	0
1	3482	1959	53.8301	61	52.764	0	5.3333	1	821.616	2.251	NA	NA	NA	NA	0	0
1	3500	1961	49.0438	59	46.8065	1	4.0667	1	1126	3.08493	1	1	1	0	0	0
1	3516	1933	78.3205	87	77.9671	0	1.8333	1	1158	3.1726	1	0	1	0	0	1
1	3528	1952	59.0873	68	57.9038	1	5.2	1	2404	6.5863	NA	NA	NA	NA	0	0
1	3532	1950	61.7638	70	60.4219	0	4.6	1	2190.92	6.00252	NA	NA	NA	NA	0	0
1	3540	1948	64.3224	72	63.8852	0	1.9667	1	1278	3.50137	NA	NA	NA	NA	0	1
1	3542	1945	67.4027	75	65.0055	1	24.0667	1	1642	4.49863	NA	NA	NA	NA	0	0
1	3552	1951	59.6274	69	58.8438	0	5.9	1	425	1.16438	NA	NA	NA	NA	0	1
0	3559	1973	37.989	47	36.3397	0	5.7333	1	321.851	0.881784	0	1	1	1	0	1
1	3564	1942	68.9836	78	67.0192	0	17.6333	4	915	2.50685	1	0	1	1	0	0
1	3567	1945	65.7315	75	64.6849	1	4.1333	1	245	0.671233	NA	NA	NA	NA	0	0
1	3575	1950	61.0356	70	60.0904	0	3	1	244	0.668493	NA	NA	NA	NA	0	0
1	3577	1944	67.7346	76	64.9127	0	2.5667	1	577.999	1.58356	0	1	1	NA	0	0
1	3584	1969	43.092	51	38.2137	0	4.2667	1	1309	3.5863	NA	NA	NA	NA	0	0
0	3585	1963	49.2206	57	46.4438	0	23.8	1	2066.85	5.66261	NA	NA	NA	NA	0	0
1	3586	1949	62.9272	71	61.8932	0	3.5667	1	395.999	1.08493	0	1	1	1	0	0
1	3587	1960	52.5273	60	51.4386	0	1.3667	1	669	1.83288	NA	NA	NA	NA	0	1
1	3588	1963	49.1788	57	43.8055	1	29.7667	1	510.7	1.39918	1	1	1	0	0	0
1	3592	1950	62.3425	70	61.0958	0	3.8333	3	852	2.33425	0	1	1	0	0	0
1	3601	1948	63.1782	72	61.1536	1	8.3	1	1217.97	3.33689	0	1	NA	0	0	0
1	3604	1942	69.1479	78	67.3452	1	21.6333	1	1310	3.58904	0	1	1	1	0	1
1	3606	1961	50.2712	59	47.0599	1	1.8333	1	945	2.58904	NA	NA	NA	NA	0	0
1	3607	1956	55.2659	64	52.9837	1	5.3333	1	1735.62	4.75512	NA	NA	NA	NA	0	0
1	3609	1942	68.6274	78	66.1809	0	20.9	1	611	1.67397	NA	NA	NA	NA	0	1
1	3612	1943	67.7425	77	66.326	0	2.5	1	519	1.42192	1	1	1	0	0	0
1	3629	1959	53.2537	61	52.3781	0	1.4	1	790.668	2.16621	0	1	1	0	0	0
1	3634	1969	43.0796	51	42.167	0	2.1333	1	879.363	2.40921	1	1	1	0	0	0
1	3638	1947	66.0466	73	64.83	0	10.1	1	1583	4.33699	NA	NA	NA	NA	0	0
1	3654	1963	47.5096	57	45.0798	1	7.7333	1	1491	4.08493	0	1	0	1	0	0
1	3666	1960	52.4022	60	44.657	0	5.2	1	483.35	1.32425	0	1	0	0	0	0
1	3701	1965	46.9848	55	45.4575	0	2.3	4	2011.99	5.51231	NA	NA	NA	NA	0	0
1	3702	1940	71.724	80	70.1832	0	4.3667	4	913.994	2.50409	NA	NA	NA	NA	0	0
1	3705	1947	65.825	73	64.474	0	4.6333	1	1429.99	3.91779	NA	NA	NA	NA	0	0
1	3752	1959	52.1534	61	51.0384	0	2.3	1	2376	6.50959	NA	NA	NA	NA	0	0
0	3757	1941	70.3644	79	68.6247	0	9.3667	1	308.24	0.844494	NA	NA	NA	NA	0	1
0	3760	1943	68.5178	77	66.7096	0	5.2	1	166.078	0.455007	NA	NA	NA	NA	0	0
0	3762	1941	70.4986	79	65.0384	1	10.9667	1	550.678	1.50871	NA	NA	NA	NA	0	1
0	3770	1957	54.6901	63	53.5397	1	13.2333	1	611.194	1.6745	NA	NA	NA	NA	0	0
1	3773	1961	50.7475	59	49.1205	0	3.5	1	1855	5.08219	NA	NA	NA	NA	0	1
0	3775	1949	62.9961	71	59.0399	0	10.9667	1	569.101	1.55918	NA	NA	NA	NA	0	0
1	3776	1949	62.9388	71	56.6247	0	13.7667	1	1826	5.00274	NA	NA	NA	NA	0	0
0	3777	1950	62.0344	70	61397	0	12.0333	1	401.003	1.09864	NA	NA	NA	NA	0	1
0	3778	1960	51.9727	60	49.6231	1	4.8	1	406.688	1.11421	NA	NA	NA	NA	0	0
1	3785	1956	56.4098	64	55.7869	1	2.9	1	2222	6.08767	NA	NA	NA	NA	0	0
1	3789	1955	57.4715	65	55.0384	1	2.7	1	1552.68	4.25393	NA	NA	NA	NA	0	0
0	3792	1955	57.737	65	56.2904	1	7.8	1	393.848	1.07904	NA	NA	NA	NA	0	0
0	3793	1945	67.7973	75	66.6246	0	1.6333	1	74.8035	0.204941	NA	NA	NA	NA	0	0
0	3795	1939	73.874	81	71.9534	1	1.7	1	325.041	0.890524	NA	NA	NA	NA	0	0
1	3800	1970	40.8247	50	36.5397	0	3.6333	1	731	2.00274	NA	NA	NA	NA	0	0
1	3814	1944	67.5518	76	66.8696	0	3.2333	1	578	1.58356	NA	NA	NA	NA	0	0
1	3815	1949	62.4795	71	61.7096	0	2.0333	1	578	1.58356	NA	NA	NA	NA	0	0
1	3819	1959	52.8814	61	50.7863	1	3.1	1	685.817	1.87895	NA	NA	NA	NA	0	0
1	3823	1955	57.0535	65	56.2055	0	1.9333	1	774.275	2.1213	NA	NA	NA	NA	0	0
1	3830	1961	51.5098	59	50.3726	1	3.6333	1	972.976	2.66569	NA	NA	NA	NA	0	0
1	3831	1937	75.4907	83	73.0384	0	4.4	1	211.989	0.580792	NA	NA	NA	NA	0	0
1	3832	1948	64.5137	72	63.623	0	2.1667	1	182	0.49863	NA	NA	NA	NA	0	0
1	3835	1941	71.7014	79	71.3732	0	2.4667	1	730.336	2.00092	NA	NA	NA	NA	0	0
1	3869	1974	38.3401	46	34.9178	0	1.7	1	791	2.16712	NA	NA	NA	NA	0	0
1	3870	1971	41.5015	49	41.078	1	0.9333	1	881	2.4137	NA	NA	NA	NA	0	1
0	3900	1940	71.6585	80	70.3034	0	15.6	4	700.628	1.91953	0	1	1	NA	0	0
1	3905	1941	71.6553	79	68.2795	1	2.7	1	420.5	1.15205	NA	NA	NA	NA	0	0
0	3910	1954	58.6986	66	56.6466	0	9	1	316.012	0.865787	NA	NA	NA	NA	0	0
1	3911	1960	52.1231	60	50.0354	0	2.0333	1	1094.95	2.99985	0	1	1	NA	0	0
0	3914	1955	57.926	65	56.7969	0	2.8	1	148.352	0.406444	0	1	1	NA	0	0
1	3916	1943	69.6712	77	67.7836	1	9.8	1	442.38	1.212	NA	NA	NA	NA	0	0
1	3229	1939	72.9795	81	69.8466	0	8.5667	1	95.6499	0.262055	1	1	1	1	1	0
1	3818	1939	72.8213	81	71.9534	1	0.9333	1	121.955	0.334123	NA	NA	NA	NA	1	0
1	3080	1932	80.1639	88	75.0201	0	2.4333	1	150.445	0.412178	NA	NA	NA	NA	1	0
1	3328	1949	63.0522	71	62.1314	0	4.5333	1	151	0.413699	NA	NA	NA	NA	1	0
1	4076	1939	73.524	81	72.8273	0	3.9333	1	150.428	0.412132	NA	NA	NA	NA	1	0
1	3321	1941	70.7796	79	69.3671	1	7.1	2	152.981	0.419125	NA	NA	NA	NA	1	0
1	4074	1953	59.6226	67	58.7562	0	3.0333	1	152.987	0.419143	NA	NA	NA	NA	1	0
1	3367	1966	45.2137	54	44.1836	0	5.8333	1	153.223	0.41979	0	0	1	1	1	0
1	3828	1935	77.2858	85	76.5397	0	2.6333	1	181.011	0.495921	NA	NA	NA	NA	1	0
1	3826	1935	77.2666	85	76.7093	0	3.9667	1	180.723	0.495132	NA	NA	NA	NA	1	0
1	3116	1946	65.0082	74	61.9403	0	23.2667	1	181.924	0.498423	NA	NA	NA	NA	1	0
1	3359	1939	72.2932	81	70.4466	0	2.6	1	183.356	0.502347	NA	NA	NA	NA	1	0
1	3444	1943	68.8405	77	67.2603	0	6.9333	1	183.884	0.503793	1	0	1	1	1	0
1	4122	1949	64.0137	71	61.2849	0	4.2333	1	183.967	0.50402	1	1	1	NA	1	0
1	4126	1957	55.7342	63	55.0369	0	2.8	1	183.985	0.504069	0	1	1	NA	1	0
1	4111	1939	73.8795	81	71.8164	0	2.2667	1	218.315	0.598123	1	1	1	NA	1	0
1	3557	1951	59.0164	69	56.0821	0	23.3	1	211.989	0.580791	NA	NA	NA	NA	1	0
1	3214	1932	78.6547	88	77.5506	0	12.7	1	212.998	0.583556	1	1	1	0	1	0
1	3366	1950	61.2877	70	60.7014	0	1.7	1	213.16	0.584001	NA	NA	NA	NA	1	0
1	3365	1962	48.9342	58	47.6548	0	1.8667	1	213	0.583562	0	1	1	0	1	0
1	3077	1949	62.5584	71	61.0795	0	11.5	1	212.766	0.582921	0	1	0	1	1	0
1	4101	1946	66.6276	74	65.838	1	2.6333	1	272.374	0.746231	NA	NA	NA	NA	1	0
1	3386	1941	71.5864	79	70.4055	1	9.6333	1	334.972	0.917732	NA	NA	NA	NA	1	0
1	3068	1940	70.6789	80	69.9967	0	0.9667	1	335	0.917808	1	1	1	0	1	0
1	3605	1936	74.6208	84	72.1066	0	23.2333	1	366.103	1.00302	NA	NA	NA	NA	1	0
1	4094	1935	77.1846	85	76.5205	1	5	1	395.631	1.08392	NA	NA	NA	NA	1	0
1	3180	1951	60.6012	69	59.9753	1	3.5	1	396.318	1.0858	NA	NA	NA	NA	1	0
1	3322	1952	60.4126	68	59.3075	1	4.1667	1	396.224	1.08555	NA	NA	NA	NA	1	0
1	3332	1939	74.0658	81	72.8819	0	1.9667	1	425.926	1.16692	NA	NA	NA	NA	1	0
1	3808	1954	57.2274	66	55.0384	0	14.2333	1	427	1.16986	NA	NA	NA	NA	1	0
1	3168	1948	63.0948	72	59.6858	1	35.8333	1	488	1.33699	1	1	0	0	1	0
1	3420	1960	50.46	60	49.5368	0	2.0667	1	489	1.33973	1	0	1	1	1	0
1	3838	1952	60.8559	68	59.8716	1	2.4333	1	547.999	1.50137	NA	NA	NA	NA	1	0
1	3829	1945	67.3595	75	66.7885	1	2.1333	1	577	1.58082	NA	NA	NA	NA	1	0
1	3433	1929	81.7863	91	80.0877	1	2.2333	1	577.975	1.58349	0	1	1	0	1	0
1	3067	1937	73.9342	83	69.7041	0	20.7333	1	579.999	1.58904	NA	NA	NA	NA	1	0
1	3207	1952	58.2573	68	54.8655	1	31.4333	1	580	1.58904	0	1	1	0	1	0
1	3951	1953	57.9205	67	54.5631	0	15.7667	1	701	1.92055	0	1	1	NA	1	0
1	3709	1944	68.6917	76	68.1421	0	2.6333	1	725.438	1.9875	NA	NA	NA	NA	1	0
1	3225	1942	69.58	78	69.1425	0	5.4	1	730.562	2.00154	NA	NA	NA	NA	1	0
1	3403	1941	68.8877	79	67.8247	0	3.7	1	762	2.08767	NA	NA	NA	NA	1	0
1	3162	1950	61.1425	70	59.589	0	13.4667	1	792	2.16986	0	1	1	0	1	0
1	4106	1941	72.0384	79	71.2869	0	2.7	1	820	2.24658	1	1	1	NA	1	0
1	3591	1950	62.7288	70	61.4192	0	1.5	1	821.951	2.25192	0	1	1	1	1	0
1	3443	1958	53.9392	62	52.8822	0	7.3333	1	822	2.25205	0	0	1	1	1	0
1	3501	1964	46.7919	56	45.307	0	17.8667	4	882	2.41644	NA	NA	NA	NA	1	0
1	3448	1955	56.6729	65	54.3205	0	3.3333	1	883	2.41918	0	1	0	0	1	0
1	3122	1950	62.1196	70	61.3014	0	3.5333	1	914	2.50411	0	1	1	0	1	0
1	3825	1954	58.171	66	56.5397	0	3.1	1	942	2.58082	NA	NA	NA	NA	1	0
1	3028	1937	75.7205	83	75.444	0	1.7	1	944	2.5863	0	0	1	0	1	0
1	4108	1947	65.1151	73	64.0082	0	3.0333	1	973	2.66575	NA	NA	NA	NA	1	0
1	3970	1946	66.5288	74	65.4572	0	6.8	4	1005	2.75342	1	0	1	NA	1	0
1	3190	1931	82.2521	89	81.4752	0	5.5667	1	1036	2.83836	NA	NA	NA	NA	1	0
1	3461	1948	62.9466	72	59.4616	0	0.8	1	1065.03	2.9179	NA	NA	NA	NA	1	0
1	3704	1950	62.6498	70	62.1115	0	2.7667	1	1089.34	2.9845	NA	NA	NA	NA	1	0
1	3616	1934	77.4603	86	71.1918	0	10.1	3	1096	3.00274	NA	NA	NA	NA	1	0
1	3280	1964	47.8033	56	46.5652	0	2.7667	1	1124	3.07945	0	1	1	0	1	0
1	3281	1955	56.8404	65	56.0384	0	5.0667	1	1152.2	3.1567	NA	NA	NA	NA	1	0
1	4115	1946	66.5753	74	64.5589	0	2.1667	1	1157	3.16986	1	1	1	NA	1	0
1	3432	1948	63.2806	72	60.0464	0	6.8333	1	1217.95	3.33685	NA	NA	NA	NA	1	0
1	3625	1945	67.0048	75	64.9699	1	1.5667	4	1248.3	3.42001	NA	NA	NA	NA	1	0
1	3822	1956	55.9945	64	53.6231	0	2.0333	1	1279	3.50411	NA	NA	NA	NA	1	0
1	3451	1956	54.7676	64	52.7896	0	7.2	1	1307.58	3.58242	1	1	1	1	1	0
1	4117	1953	59.9315	67	58.5699	1	2.8333	1	1309.96	3.58893	NA	NA	NA	NA	1	0
1	3467	1945	66.8932	75	65.0685	0	9.5	1	1369.82	3.75292	NA	NA	NA	NA	1	0
1	3001	1946	65.1425	74	63.5918	0	11333	1	1371	3.75616	NA	NA	NA	NA	1	0
1	3469	1955	56.9751	65	55.6603	0	4.2	1	1430	3.91781	NA	NA	NA	NA	1	0
1	3758	1942	69.3644	78	68.3726	0	9.3667	1	1430.63	3.91952	NA	NA	NA	NA	1	0
1	4055	1942	69.8944	78	69.2247	0	3.6	1	1460.08	4.00022	0	1	1	NA	1	0
1	3711	1976	37.0389	44	36.5109	0	1.7667	1	1492	4.08767	NA	NA	NA	NA	1	0
1	3593	1957	55.3534	63	54.8255	1	1.3	1	1522.05	4.17	NA	NA	NA	NA	1	0
1	3459	1959	51.6712	61	48.6867	0	23	1	1522	4.16986	NA	NA	NA	NA	1	0
1	3205	1938	72.6192	82	71.5425	0	7.4667	1	1553	4.25479	0	1	1	1	1	0
1	3603	1953	58.0822	67	54.7684	0	34.7667	1	1613	4.41918	NA	NA	NA	NA	1	0
1	3622	1949	62.2655	71	61.1315	0	1.7667	1	1643	4.50137	NA	NA	NA	NA	1	0
1	4054	1950	62.2398	70	61.4767	1	2.5333	2	1644	4.50411	0	0	0	NA	1	0
1	3407	1945	65.2082	75	64.5068	0	7	1	1671.42	4.57923	NA	NA	NA	NA	1	0
1	3305	1946	64.7616	74	63.9671	0	1.1333	1	1674	4.5863	1	1	1	0	1	0
1	3530	1947	64.597	73	63.137	0	4.7	1	1678.35	4.59823	NA	NA	NA	NA	1	0
1	3787	1964	48.4863	56	46.6231	0	5.4333	1	1734	4.75068	NA	NA	NA	NA	1	0
1	3435	1957	54.4658	63	53.5178	0	2.5333	4	1766	4.83836	0	0	1	1	1	0
1	4056	1948	64.1612	72	63.8361	0	1.3667	1	2010	5.50685	1	1	1	NA	1	0
1	3522	1957	54.1671	63	53.3973	0	2.4667	1	2070	5.67123	0	1	1	1	1	0
1	3781	1940	72.1093	80	69.6231	0	18.3333	1	2130	5.83562	NA	NA	NA	NA	1	0
1	3062	1950	61.0438	70	58.5268	1	2.6667	3	2133	5.84384	0	1	0	1	1	0
1	4035	1952	60.4541	68	59.8798	0	1.8667	1	2191	6.00274	NA	NA	NA	NA	1	0
1	3780	1942	70.0535	78	68.7096	1	4.6	1	2221	6.08493	NA	NA	NA	NA	1	0
1	3431	1950	61.5671	70	60.6548	1	3.6667	4	2314	6.33973	NA	NA	NA	NA	1	0
1	3664	1951	61.8411	69	59.5616	1	19.3333	1	2341	6.4137	0	0	0	1	1	0
0	3791	1937	75.6822	83	72.3726	1	2.2	1	2671	7.3178	NA	NA	NA	NA	1	0
0	3027	1943	69.5096	77	67.5863	0	11	1	2734	7.4904	0	1	1	1	1	0
0	3954	1947	64.4492	73	64.0192	1	5.1333	1	3121.04	8.5508	1	0	1	NA	1	0
0	3574	1946	65.1315	74	64.0548	1	6.5	1	3237	8.8685	NA	NA	NA	NA	1	0
0	3856	1943	67.8986	77	66.6548	0	2.1333	1	3322.01	9.1014	NA	NA	NA	NA	1	0
0	3556	1945	65.4932	75	62.5503	0	6.3	1	3469.98	9.5068	NA	NA	NA	NA	1	0
0	3419	1943	67.4055	77	66.6932	1	1.1333	1	3501.99	9.5945	NA	NA	NA	NA	1	0
0	3953	1958	53.5945	62	52.5863	0	2.4333	1	454.838	1.24613	NA	NA	NA	NA	0	0
1	3957	1943	68.9	77	65.8658	0	3.6	1	943.964	2.5862	1	1	1	NA	0	1
1	3960	1960	52.7158	60	50.4634	0	7.8	1	941.412	2.57921	0	1	1	NA	0	0
1	3961	1976	36.6475	44	33.968	0	10.4333	4	972.952	2.66562	1	0	1	NA	0	1
1	3964	1973	39.2247	47	37.9288	0	3.4667	3	1460.7	4.00192	NA	NA	NA	NA	0	0
1	4001	1961	49.8932	59	47.3316	0	3.2333	1	670	1.83562	0	1	1	NA	0	1
1	4011	1960	51.5546	60	48.5411	1	31.4333	1	2161	5.92055	0	0	0	NA	0	0
0	4012	1961	51.288	59	49.9397	1	3.0333	1	122.445	0.335465	0	1	1	NA	0	0
1	4019	1957	54.912	63	49.8301	1	1.8333	1	2281	6.24932	NA	NA	NA	NA	0	0
1	4020	1951	60.7586	69	57.6904	0	1.8667	1	1073.95	2.94232	NA	NA	NA	NA	0	0
1	4021	1939	72.8325	81	52.7314	1	25.0667	1	274	0.750685	NA	NA	NA	NA	0	1
1	4022	1964	47.5246	56	46.6595	0	6.4	1	1522.03	4.16995	NA	NA	NA	NA	0	0
1	4024	1940	72.2923	80	70.7296	0	3.7	1	153.377	0.420212	0	1	1	NA	0	0
1	4025	1963	49.1655	57	45.6	1	1.9	1	122.363	0.335241	NA	NA	NA	NA	0	0
1	4026	1937	75.0528	83	74.0466	0	2.2	1	94.284	0.258312	NA	NA	NA	NA	0	0
1	4027	1946	66.3843	74	64.9315	0	7.2333	1	725.494	1.98765	NA	NA	NA	NA	0	0
1	4029	1964	48.7568	56	47.5809	0	3.4333	1	1125.99	3.08489	0	1	1	NA	0	0
0	4030	1938	74.6959	82	70.144	0	22.0667	1	828.178	2.26898	NA	NA	NA	NA	0	1
1	4033	1963	49.9726	57	45.0622	1	3.0333	1	913.994	2.50409	0	0	1	NA	0	0
1	4034	1958	54.9671	62	49.7561	1	31.9333	1	807.49	2.2123	0	1	0	NA	0	0
0	4037	1960	52.8315	60	51.1246	0	8.2333	1	821.281	2.25008	NA	NA	NA	NA	0	0
1	4038	1942	70.7973	78	69.9195	1	1.2333	1	183	0.50137	NA	NA	NA	NA	0	1
1	4051	1959	53.0564	61	47.1123	1	1.2	4	1431	3.92055	1	1	1	NA	0	0
1	4052	1945	66.541	75	65.5452	1	5.3667	3	152.907	0.418923	NA	NA	NA	NA	0	0
1	4057	1951	61.1573	69	60.2822	0	3.7333	1	1614	4.42192	0	0	1	NA	0	0
1	4058	1950	62.3711	70	60.2795	0	2.1	1	822.032	2.25214	NA	NA	NA	NA	0	1
0	4059	1965	46.582	55	46.041	1	1.8333	1	370.196	1.01423	0	1	1	NA	0	1
1	4071	1954	58.4259	66	56.4822	0	11.6667	1	183.994	0.504093	1	1	1	NA	0	0
1	4072	1955	57.1573	65	53.9425	1	9	1	183.994	0.504092	NA	NA	NA	NA	0	0
1	4073	1965	47.3542	55	43.5099	1	5.9333	1	212	0.580822	0	1	1	NA	0	0
1	4077	1964	48.2295	56	47.4426	0	5.9333	1	638	1.74795	NA	NA	NA	NA	0	0
1	4091	1944	68.377	76	66.228	1	14.8	1	183.99	0.504083	1	1	1	NA	0	0
1	4096	1963	49.5817	57	47.5233	1	2.3	1	87.3598	0.239342	NA	NA	NA	NA	0	0
1	4098	1953	58.8771	67	58.2104	0	6	1	242	0.663014	0	1	1	NA	0	0
0	4099	1953	59.5892	67	58.6	1	2.7667	1	626.338	1.71599	1	1	1	NA	0	0
1	4102	1944	68.776	76	68.1967	0	1.5667	1	774.972	2.12321	NA	NA	NA	NA	0	0
1	4103	1953	58.9919	67	58.0656	0	7.1333	1	699.994	1.91779	0	0	1	NA	0	0
1	4112	1959	53.4603	61	53.1456	0	3.3	1	493.865	1.35305	NA	NA	NA	NA	0	0
0	4113	1979	33.7178	41	30.9918	1	22.5	4	397.205	1.08823	NA	NA	NA	NA	0	1
1	4123	1952	60.2737	68	59.5383	1	4.2667	1	281.87	0.772247	0	1	NA	NA	0	0
1	4124	1942	71.1178	78	68.2137	0	3.9667	1	153.149	0.419588	0	0	0	NA	0	1
1	4125	1949	64.0192	71	62.9828	0	2.5667	1	184.56	0.505643	1	0	1	NA	0	1
