# Supplementary material for: A zebrafish screen reveals Renin-angiotensin system inhibitors as neuroprotective via mitochondrial restoration in dopamine neurons
Source: eLife. 2021 Sep 22;10:e69795. doi: 10.7554/eLife.69795 (PMC8457844; doi:10.7554/eLife.69795)
Supplement: Figure 7—source data 2. — -RAAS vs No RAAS time to levodopa. -Part 1, 2, 3. [file elife-69795-fig7-data2.xlsx]

## Sheet: Sheet1
Figure 7 - source data 2
PPMI database time to levodopa/UPDRS score analysis
Worksheet 1 - Time to levodopa data for RAAS and No RAAS patients
Worksheet 2 - UPDRS Part 1
Worksheet 3 - UPDRS Part 2
Worksheet 4 - UPDRS Part 3

## Sheet: Time to levodopa
RAAS	NO RAAS		Unpaired t test
34.0603	7.03562		P value	0.0346
19.0027	38.0712		P value summary	*
7.00274	12.9534		Significantly different (P < 0.05)?	Yes
5.95069	2.99178		One- or two-tailed P value?	Two-tailed
5.95069	18.0493		t, df	t=2.122, df=306
13.0192	6.96986
31.0356	2.9589
5.03014	24.0329
14.0055	31.4829
5.03014	24
87.8136	5.03014
12.0329	14.9918
4.01096	18.0164
6.96986	31.4829
51.0575	30.0493
26.9589	31.4829
36.0329	6.01644
6.01644	24
11.0137	14.9918
11.0137	22.9808
3.02466	45.0082
19.0685	31.4829
70.0274	3.02466
5.03014	15.0247
48.0329	17.9836
24	5.03014
73.0192	31.4829
47.0466	24
24	4.04384
25.0521	5.03014
89.8848	12
6.04931	43.0685
18.9699	30.0822
115.134	19.0027
109.217	7.03562
8.97534	6.01644
33.0411	31.4829
45.0411	40.0438
41.0301	31.4829
38.0384	17.0301
55.0027	5.98356
106.422	17.063
102.61	84.0657
31.989	8.02192
55.0356	6.04931
66.0822	20.0877
45.074	9.0411
55.0356	31.0356
114.082	5.03014
4.96438	10.0603
36	17.0301
5.98356	31.4829
54.0493	53.9836
27.0247	24
30.0493	19.0027
6.04931	52.0438
54.0164	18.0164
7.03562	8.0548
7.00274	47.0137
76.0767	25.0192
40.0438	42.0164
13.0192	31.4829
72.0329	36.0329
18.0164	83.0466
16.0438	5.98356
26.0384	31.4829
76.9644	21.0082
35.0137	6.01644
13.0192	41.0301
5.03014	13.0192
43.0685	35.0466
70.126	43.0027
30.9699	28.0438
6.96986	31.0685
36	13.0192
47.0137	19.0027
14.0384	42.0822
6.04931	24.0329
19.0685	31.4829
50.0384	31.4829
53.0301	40.0438
23.0466	28.011
29.0301	56.0548
42.0493	36.0329
58.0603	72.0329
68.0548	53.063
27.0247	27.0247
43.0027	8.02192
16.0767	65.063
50.0384	5.03014
7.00274	7.95616
57.0082	36
36.9534	29.063
28.9973	9.0411
5.03014	12.0329
49.0521	9.0411
	34.0274
	31.4829
	19.989
	31.4829
	13.9726
	55.0027
	31.4829
	31.4829
	45.0082
	7.95616
	23.0137
	79.0356
	5.95069
	36.0329
	31.4829
	31.4829
	60.0329
	6.04931
	8.97534
	31.4829
	24
	12
	31.4829
	47.0137
	76.9973
	73.052
	69.1068
	43.989
	23.0137
	28.011
	56.0548
	51.0575
	10.9808
	33.9945
	58.0932
	31.4829
	39.9781
	6.04931
	31.4829
	9.99452
	6.04931
	15.0247
	57.074
	93.074
	27.0247
	9.00822
	31.4829
	14.0055
	26.0055
	48.0329
	12.0329
	57.074
	46.0932
	19.989
	31.4829
	21.9945
	31.4829
	31.4829
	78.1151
	24
	36
	30.9699
	31.989
	36
	31.4829
	29.9836
	74.9918
	24
	31.4829
	32.0219
	35.0137
	60.9863
	32.0219
	36.0329
	71.0466
	2.99178
	35.0137
	37.0192
	2.99178
	74.0712
	20.9753
	22.0274
	9.0411
	47.0466
	31.0685
	37.0192
	50.0384
	31.4829
	66.0822
	31.4829
	32.0877
	31.4829
	18.0493
	4.01096
	66.0822
	49.0192
	30.0493
	5.03014
	31.4829
	16.011
	17.0301
	6.96986
	5.95069
	28.9644
	28.9644
	43.0356
	12.9863
	48.0329
	13.0192
	24.0329
	31.4829
	45.0411
	26.0055
	31.989
	82.0603
	31.4829

## Sheet: UPDRS1
Months	NO RAS		Other_HTN		RAS			ANOVA summary			Tukey's multiple comparisons test	Mean Diff.	95.00% CI of diff.	Significant?	Summary	Adjusted P Value
0	2.13636	0.135225	2.12264	0.121167	2.17241	0.154622		F	4.58		NO RAS vs. Other_HTN	0.02283	-0.2364 to 0.2821	No	ns	0.9748
3	2.38095	0.157408	2.40594	0.159317	2.15789	0.138602		P value	0.0169		NO RAS vs. RAS	0.2887	0.02945 to 0.5480	Yes	*	0.0262
6	2.27835	0.155953	2.32432	0.175159	2.24444	0.149477		P value summary	*		Other_HTN vs. RAS	0.2659	0.006615 to 0.5252	Yes	*	0.0434
9	2.25	0.158335	2.23256	0.154879	2.02	0.151846		Significant diff. among means (P < 0.05)?	Yes
12	2.248	0.16832	2.17	0.137109	2.30189	0.139484		R squared	0.2028
18	2.41803	0.163556	2.42424	0.166877	2.125	0.136265
24	2.55738	0.269996	2.64286	0.206282	2.33962	0.139977
30	2.62992	0.178976	2.61765	0.171806	2.27778	0.178481
36	2.77778	0.204309	2.76238	0.19959	2.35714	0.156587
42	2.608	0.18487	2.53465	0.162828	2.49091	0.178339
48	3.072	0.239683	3.0202	0.216311	2.30189	0.155149
54	2.98361	0.231768	2.89691	0.221039	2.24074	0.139994
60	3.0678	0.25943	2.95699	0.240244	2.625	0.165763

## Sheet: UPDRS2
Months	NORAS		NORAS_HTN		RAS			ANOVA summary
0	6.17424	0.407116	6.00943	0.334722	5	0.313154		F	2.584
3	6.99206	0.449554	6.9505	0.387778	5.75439	0.340545		P value	0.0894
6	7.09278	0.455317	6.98649	0.314328	6.73333	0.432777		P value summary	ns
9	7.3271	0.444244	7.2093	0.777399	6.66	0.413413		Significant diff. among means (P < 0.05)?	No
12	8	0.524981	7.67	0.415132	6.62264	0.375682		R squared	0.1255
18	8.21138	0.533557	8.19	0.465517	6.85714	0.424993
24	8.85246	0.574541	8.54082	0.500404	8.07547	0.484396
30	9.33858	0.640904	8.80392	0.499085	7.66667	0.493303
36	9.54762	0.57212	9.39604	0.494941	8.33929	0.470717
42	10.184	0.673428	9.55446	0.550693	8.61818	0.522291
48	10.6349	0.732885	9.87	0.601948	8.96154	0.540451
54	11.0656	0.776027	10.1031	0.617173	9.07407	0.510581
60	10.5509	0.726718	9.78495	0.64556	9.39286	0.530944

## Sheet: UPDRS3
Months	NORAAS		NORAAS_HTN		RAAS			ANOVA summary
0	19.2273	0.859633	18.7076	0.700272	18.2414	0.895912		F	0.202
3	20.7778	0.938856	20.4257	0.774385	20.3158	0.916664		P value	0.818
6	21.9278	1.02521	21.2027	0.970498	21.3409	0.984962		P value summary	ns
9	21.1651	1.09084	20.5977	0.995776	20.7	1.0563		Significant diff. among means (P < 0.05)?	No
12	22.3571	1.10471	21.823	0.879176	19.4849	1.06481		R squared	0.0111
18	24.5	1.11468	23.95	0.959837	23.7586	1.19327
24	24.7338	1.19554	23.6967	0.9049	25.3939	1.38274
30	25.4567	1.21101	24.6177	1.02484	23.3704	1.31684
36	25.6823	1.21212	25.3778	0.905292	25.948	1.29124
42	26.984	1.30925	26	1.10999	27.3091	1.19747
48	26.3037	1.32503	25.4183	0.928591	27.2143	1.15337
54	27.3197	1.3829	26.567	1.24371	28.7091	1.31535
60	25.6229	1.3289	24.4966	0.956045	27.2796	1.27211
